# Supplementary material for: Natural variation in autumn expression is the major adaptive determinant distinguishing Arabidopsis FLC haplotypes
Source: eLife. 2020 Sep 9;9:e57671. doi: 10.7554/eLife.57671 (PMC7518893; doi:10.7554/eLife.57671)
Supplement: Source data 1. [file elife-57671-data1.xlsx]

## Sheet: Key
Site	Sowing date
Norwich_14	2014-09-29
North_Sweden_early_14	2016-08-26
North_Sweden_late_14	2016-09-08
South_Sweden_14	2016-09-24
Norwich_16	2016-09-15
North_Sweden_16	2016-08-12
South_Sweden_16	2016-09-06
*Time 0 is 00:00 on the day of sowing.

## Sheet: Norwich_14
Days_from_sowing	Temperature_oC
0	13.7917
0.0152778	13.4672
0.0361111	13.2733
0.0569444	13.0733
0.0777778	12.919
0.0986111	12.6227
0.119444	12.5971
0.140278	12.4824
0.161111	12.2542
0.181944	11.9737
0.202778	11.9096
0.223611	11.8802
0.244444	11.6626
0.265278	11.7022
0.286111	11.7584
0.306944	12.1851
0.327778	13.0636
0.348611	14.4586
0.369444	15.7031
0.390278	17.5796
0.411111	19.535
0.431944	21.1854
0.452778	24.2843
0.473611	24.7987
0.494444	27.1574
0.515278	28.037
0.536111	27.3916
0.556944	26.2942
0.577778	25.1344
0.598611	24.6761
0.619444	25.5607
0.640278	24.1954
0.661111	22.8346
0.681944	21.618
0.702778	20.5875
0.723611	20.2498
0.744444	19.9078
0.765278	19.176
0.786111	18.6308
0.806944	18.2361
0.827778	17.9289
0.848611	17.647
0.869444	17.4811
0.890278	17.2795
0.911111	17.077
0.931944	16.6636
0.952778	16.1039
0.973611	15.8343
0.994444	15.7473
1.01528	15.8184
1.03611	15.7827
1.05694	15.6726
1.07778	15.4265
1.09861	15.0806
1.11944	15.02
1.14028	14.827
1.16111	15.0579
1.18194	15.2501
1.20278	15.3281
1.22361	15.4824
1.24444	15.394
1.26528	15.4661
1.28611	15.375
1.30694	15.4998
1.32778	16.0975
1.34861	16.884
1.36944	18.2451
1.39028	19.4096
1.41111	20.5751
1.43194	21.7087
1.45278	23.2596
1.47361	25.6252
1.49444	27.6031
1.51528	29.1189
1.53611	28.0763
1.55694	26.7814
1.57778	26.5594
1.59861	26.6281
1.61944	26.009
1.64028	27.8718
1.66111	27.7021
1.68194	25.7191
1.70278	23.793
1.72361	22.2375
1.74444	20.5495
1.76528	19.1904
1.78611	17.9636
1.80694	17.1196
1.82778	16.5312
1.84861	16.0337
1.86944	15.8046
1.89028	15.5144
1.91111	15.2094
1.93194	15.0641
1.95278	14.9867
1.97361	14.9142
1.99444	14.7735
2.01528	14.6121
2.03611	14.5656
2.05694	14.6715
2.07778	14.8114
2.09861	14.9716
2.11944	14.972
2.14028	14.9223
2.16111	14.8571
2.18194	14.9122
2.20278	14.8749
2.22361	15.0292
2.24444	15.1129
2.26528	15.3093
2.28611	15.4317
2.30694	15.8914
2.32778	16.5362
2.34861	17.549
2.36944	18.8065
2.39028	20.1438
2.41111	20.2293
2.43194	22.9141
2.45278	26.4801
2.47361	26.4369
2.49444	25.147
2.51528	24.4758
2.53611	25.4806
2.55694	24.8352
2.57778	24.5481
2.59861	23.7647
2.61944	24.0606
2.64028	22.8361
2.66111	22.6778
2.68194	22.6141
2.70278	22.3828
2.72361	21.2823
2.74444	20.0604
2.76528	19.1998
2.78611	18.292
2.80694	17.8235
2.82778	17.1668
2.84861	16.6827
2.86944	16.3472
2.89028	16.2028
2.91111	16.2225
2.93194	16.0634
2.95278	16.1206
2.97361	16.063
2.99444	15.9265
3.01528	15.9058
3.03611	15.7827
3.05694	15.7834
3.07778	15.7122
3.09861	15.8256
3.11944	15.7445
3.14028	15.7232
3.16111	15.8381
3.18194	15.8273
3.20278	15.832
3.22361	15.8514
3.24444	15.6952
3.26528	15.6065
3.28611	15.5109
3.30694	15.6939
3.32778	16.212
3.34861	16.9149
3.36944	18.0408
3.39028	19.1512
3.41111	20.4226
3.43194	21.3511
3.45278	22.0719
3.47361	23.8083
3.49444	23.6982
3.51528	23.5929
3.53611	24.4571
3.55694	25.5631
3.57778	24.8967
3.59861	23.7939
3.61944	24.7983
3.64028	23.8576
3.66111	23.1189
3.68194	21.5474
3.70278	21.0757
3.72361	20.2271
3.74444	19.3446
3.76528	18.7419
3.78611	17.8351
3.80694	17.4852
3.82778	16.9537
3.84861	16.5976
3.86944	16.2714
3.89028	15.9088
3.91111	15.7815
3.93194	15.5654
3.95278	15.2935
3.97361	15.14
3.99444	14.9863
4.01528	14.8652
4.03611	14.7793
4.05694	14.5948
4.07778	14.4937
4.09861	14.3275
4.11944	14.1724
4.14028	14.0025
4.16111	13.7506
4.18194	13.8323
4.20278	13.7923
4.22361	13.9413
4.24444	13.8896
4.26528	13.8658
4.28611	13.9621
4.30694	14.1382
4.32778	14.4955
4.34861	15.3677
4.36944	16.4965
4.39028	16.8221
4.41111	17.3987
4.43194	18.5331
4.45278	19.676
4.47361	21.6365
4.49444	23.1097
4.51528	23.9041
4.53611	25.1954
4.55694	24.6449
4.57778	24.4476
4.59861	24.5973
4.61944	23.8389
4.64028	23.3452
4.66111	23.5047
4.68194	23.2272
4.70278	22.1713
4.72361	21.5077
4.74444	20.3522
4.76528	18.9612
4.78611	17.9897
4.80694	17.4298
4.82778	16.7769
4.84861	16.4458
4.86944	16.1304
4.89028	15.8543
4.91111	15.5752
4.93194	15.2723
4.95278	14.9413
4.97361	14.6853
4.99444	14.5185
5.01528	14.405
5.03611	14.3107
5.05694	14.2818
5.07778	14.0154
5.09861	13.905
5.11944	13.8231
5.14028	13.8609
5.16111	13.8572
5.18194	13.921
5.20278	13.8977
5.22361	14.0368
5.24444	14.408
5.26528	14.5762
5.28611	14.9139
5.30694	15.1678
5.32778	15.72
5.34861	16.8569
5.36944	17.4404
5.39028	18.6946
5.41111	19.8479
5.43194	21.6054
5.45278	22.3222
5.47361	22.8581
5.49444	22.2065
5.51528	22.1737
5.53611	19.5465
5.55694	18.2442
5.57778	16.7813
5.59861	15.6028
5.61944	15.2976
5.64028	15.313
5.66111	15.4389
5.68194	15.3163
5.70278	15.1229
5.72361	14.5756
5.74444	14.5872
5.76528	13.6403
5.78611	12.6004
5.80694	11.9165
5.82778	11.4014
5.84861	10.9876
5.86944	10.7384
5.89028	10.4586
5.91111	10.3262
5.93194	10.2305
5.95278	9.94729
5.97361	9.66247
5.99444	9.26592
6.01528	9.13895
6.03611	8.78079
6.05694	8.4641
6.07778	8.10571
6.09861	7.8522
6.11944	7.48624
6.14028	7.28262
6.16111	6.94922
6.18194	6.83838
6.20278	6.59196
6.22361	6.42746
6.24444	6.13999
6.26528	6.05087
6.28611	6.05919
6.30694	6.43092
6.32778	8.07875
6.34861	9.467
6.36944	12.0154
6.39028	14.3179
6.41111	16.8568
6.43194	21.6002
6.45278	22.1649
6.47361	22.6644
6.49444	21.7905
6.51528	21.6671
6.53611	23.3444
6.55694	21.2336
6.57778	20.0177
6.59861	20.1438
6.61944	20.1318
6.64028	20.2285
6.66111	20.7574
6.68194	18.7985
6.70278	17.2322
6.72361	15.9309
6.74444	15.0132
6.76528	13.8879
6.78611	12.6778
6.80694	11.8281
6.82778	11.0031
6.84861	10.4517
6.86944	9.94493
6.89028	9.4127
6.91111	9.041
6.93194	8.64001
6.95278	8.326
6.97361	8.01213
6.99444	7.82897
7.01528	7.60844
7.03611	7.46819
7.05694	7.25107
7.07778	7.14751
7.09861	7.03134
7.11944	6.98473
7.14028	7.05694
7.16111	7.22149
7.18194	7.26964
7.20278	7.26521
7.22361	7.17132
7.24444	7.1976
7.26528	7.40862
7.28611	7.92653
7.30694	8.52529
7.32778	9.35544
7.34861	10.2822
7.36944	11.263
7.39028	11.9603
7.41111	12.6111
7.43194	13.2111
7.45278	13.4776
7.47361	13.4259
7.49444	13.2418
7.51528	13.2582
7.53611	13.31
7.55694	13.7068
7.57778	14.3261
7.59861	14.197
7.61944	13.9919
7.64028	13.7331
7.66111	13.6292
7.68194	13.7816
7.70278	13.7546
7.72361	13.6515
7.74444	13.2569
7.76528	12.8153
7.78611	12.4264
7.80694	12.0219
7.82778	11.9579
7.84861	11.9022
7.86944	11.909
7.89028	12.0822
7.91111	12.3323
7.93194	12.4555
7.95278	12.5266
7.97361	12.6467
7.99444	12.4756
8.01528	12.4095
8.03611	12.0123
8.05694	11.7643
8.07778	11.5189
8.09861	11.3336
8.11944	11.1091
8.14028	10.5046
8.16111	10.0658
8.18194	9.59715
8.20278	9.16874
8.22361	9.01845
8.24444	8.79181
8.26528	8.78275
8.28611	8.85048
8.30694	8.97316
8.32778	9.67039
8.34861	10.2175
8.36944	10.9645
8.39028	11.9099
8.41111	12.9894
8.43194	15.139
8.45278	15.2553
8.47361	17.7125
8.49444	17.2542
8.51528	16.0862
8.53611	17.716
8.55694	16.513
8.57778	17.488
8.59861	17.1148
8.61944	16.6159
8.64028	17.9549
8.66111	18.3461
8.68194	16.9899
8.70278	15.5262
8.72361	14.3214
8.74444	13.0713
8.76528	11.8648
8.78611	11.1952
8.80694	10.6319
8.82778	10.1382
8.84861	9.8294
8.86944	9.64782
8.89028	9.40535
8.91111	9.19393
8.93194	8.99174
8.95278	8.7598
8.97361	8.62027
8.99444	8.27882
9.01528	8.11877
9.03611	7.94679
9.05694	7.83336
9.07778	7.7513
9.09861	7.63934
9.11944	7.41393
9.14028	7.31343
9.16111	7.1772
9.18194	6.95744
9.20278	6.86658
9.22361	6.78335
9.24444	6.71816
9.26528	6.80446
9.28611	7.10607
9.30694	7.73854
9.32778	8.60456
9.34861	9.61864
9.36944	10.9274
9.39028	11.8204
9.41111	12.6541
9.43194	12.9709
9.45278	14.4706
9.47361	15.7458
9.49444	16.6509
9.51528	16.1484
9.53611	17.2478
9.55694	18.2373
9.57778	19.6198
9.59861	20.0595
9.61944	20.6129
9.64028	19.7655
9.66111	19.4446
9.68194	19.734
9.70278	18.6372
9.72361	17.156
9.74444	15.7166
9.76528	14.7791
9.78611	14.1431
9.80694	13.9641
9.82778	13.5968
9.84861	13.1873
9.86944	12.6915
9.89028	12.0615
9.91111	11.6737
9.93194	11.4308
9.95278	11.1921
9.97361	10.9721
9.99444	10.8222
10.0153	10.667
10.0361	10.5712
10.0569	10.4077
10.0778	10.2631
10.0986	10.0105
10.1194	9.99335
10.1403	9.85336
10.1611	9.88432
10.1819	9.83333
10.2028	9.73125
10.2236	9.79205
10.2444	9.89504
10.2653	9.89608
10.2861	10.0181
10.3069	10.3162
10.3278	11.3236
10.3486	13.1579
10.3694	14.9088
10.3903	16.4965
10.4111	17.6554
10.4319	20.9233
10.4528	22.3515
10.4736	23.0113
10.4944	23.2995
10.5153	22.2251
10.5361	21.5451
10.5569	18.5925
10.5778	20.0508
10.5986	19.1738
10.6194	20.0936
10.6403	20.7133
10.6611	20.3732
10.6819	18.2842
10.7028	16.6835
10.7236	15.5494
10.7444	14.4271
10.7653	13.7034
10.7861	12.9976
10.8069	12.6647
10.8278	12.4585
10.8486	12.3661
10.8694	12.3053
10.8903	12.1978
10.9111	12.1527
10.9319	11.9175
10.9528	11.7803
10.9736	11.6076
10.9944	11.4701
11.0153	11.4196
11.0361	11.3117
11.0569	11.3034
11.0778	11.1932
11.0986	10.9185
11.1194	10.6635
11.1403	10.54
11.1611	10.35
11.1819	10.2793
11.2028	10.1213
11.2236	9.97653
11.2444	9.89043
11.2653	9.66085
11.2861	9.4794
11.3069	9.54407
11.3278	10.2569
11.3486	11.6958
11.3694	13.3002
11.3903	14.8103
11.4111	15.5991
11.4319	18.5248
11.4528	19.665
11.4736	19.6392
11.4944	20.6254
11.5153	21.2876
11.5361	21.6313
11.5569	20.6375
11.5778	19.8932
11.5986	19.9438
11.6194	22.2207
11.6403	22.2591
11.6611	21.4502
11.6819	20.8724
11.7028	18.7699
11.7236	17.29
11.7444	16.4006
11.7653	14.8156
11.7861	13.7242
11.8069	13.1159
11.8278	12.577
11.8486	12.4669
11.8694	12.5199
11.8903	12.2722
11.9111	12.1614
11.9319	12.181
11.9528	12.0874
11.9736	12.2333
11.9944	12.1207
12.0153	11.8119
12.0361	11.622
12.0569	11.5219
12.0778	11.2927
12.0986	11.0167
12.1194	10.9815
12.1403	10.9688
12.1611	11.0128
12.1819	10.9308
12.2028	10.7996
12.2236	10.6914
12.2444	10.3899
12.2653	9.96975
12.2861	9.90715
12.3069	9.86339
12.3278	10.6616
12.3486	11.8082
12.3694	13.477
12.3903	14.6384
12.4111	16.1793
12.4319	16.8824
12.4528	18.1715
12.4736	18.8243
12.4944	19.3412
12.5153	20.0934
12.5361	19.8318
12.5569	20.5869
12.5778	20.6122
12.5986	19.7874
12.6194	19.7345
12.6403	19.5776
12.6611	18.6674
12.6819	19.1478
12.7028	17.9416
12.7236	16.3221
12.7444	15.183
12.7653	14.4934
12.7861	13.9219
12.8069	13.105
12.8278	12.6492
12.8486	11.9309
12.8694	11.2744
12.8903	10.9351
12.9111	10.3877
12.9319	10.0306
12.9528	9.66314
12.9736	9.37894
12.9944	9.07165
13.0153	8.89949
13.0361	8.75909
13.0569	8.73104
13.0778	8.36044
13.0986	8.15315
13.1194	7.85232
13.1403	7.5971
13.1611	7.37699
13.1819	7.14541
13.2028	7.01315
13.2236	6.71385
13.2444	6.64685
13.2653	6.42914
13.2861	6.42406
13.3069	6.40964
13.3278	6.93708
13.3486	8.12987
13.3694	9.61871
13.3903	11.1897
13.4111	13.0661
13.4319	15.1041
13.4528	17.467
13.4736	18.9766
13.4944	19.4958
13.5153	19.1925
13.5361	19.4435
13.5569	19.8774
13.5778	19.4523
13.5986	19.2644
13.6194	18.8138
13.6403	17.6696
13.6611	16.7002
13.6819	16.055
13.7028	15.2171
13.7236	14.4072
13.7444	13.8763
13.7653	13.3303
13.7861	13.0705
13.8069	12.7788
13.8278	12.63
13.8486	12.3801
13.8694	12.43
13.8903	12.4474
13.9111	12.3867
13.9319	12.5336
13.9528	12.5025
13.9736	12.4943
13.9944	12.4071
14.0153	12.3722
14.0361	12.225
14.0569	12.1542
14.0778	12.0258
14.0986	12.1732
14.1194	12.1818
14.1403	12.2736
14.1611	12.3413
14.1819	12.3986
14.2028	12.4015
14.2236	12.3263
14.2444	12.3266
14.2653	12.362
14.2861	12.4622
14.3069	12.6995
14.3278	12.8038
14.3486	13.0778
14.3694	13.4111
14.3903	13.5877
14.4111	14.3398
14.4319	14.6814
14.4528	16.1383
14.4736	17.2837
14.4944	18.0355
14.5153	19.468
14.5361	19.1132
14.5569	18.5579
14.5778	18.6481
14.5986	18.2657
14.6194	17.6632
14.6403	17.4663
14.6611	17.2779
14.6819	16.6476
14.7028	16.1857
14.7236	15.5681
14.7444	15.1724
14.7653	14.9068
14.7861	14.7908
14.8069	14.7695
14.8278	14.6369
14.8486	14.5106
14.8694	14.4102
14.8903	14.3328
14.9111	14.2781
14.9319	14.0156
14.9528	13.9596
14.9736	13.8848
14.9944	13.8225
15.0153	13.7518
15.0361	13.5869
15.0569	13.5337
15.0778	13.4384
15.0986	13.4671
15.1194	13.4021
15.1403	13.3224
15.1611	13.3412
15.1819	13.2719
15.2028	13.285
15.2236	13.1985
15.2444	13.1731
15.2653	13.1947
15.2861	13.2715
15.3069	13.3768
15.3278	13.8895
15.3486	14.8921
15.3694	16.6423
15.3903	17.7819
15.4111	18.3096
15.4319	19.9754
15.4528	21.7857
15.4736	23.2074
15.4944	23.2993
15.5153	22.1757
15.5361	20.7498
15.5569	20.2493
15.5778	20.1566
15.5986	20.6781
15.6194	21.4982
15.6403	23.3477
15.6611	20.7268
15.6819	17.9736
15.7028	16.79
15.7236	15.83
15.7444	14.9655
15.7653	14.0782
15.7861	13.5732
15.8069	13.122
15.8278	12.6424
15.8486	12.2156
15.8694	12.0651
15.8903	11.8297
15.9111	11.4839
15.9319	11.1604
15.9528	11.129
15.9736	11.0529
15.9944	10.9146
16.0153	10.8066
16.0361	10.6733
16.0569	10.6494
16.0778	10.4283
16.0986	10.3386
16.1194	10.2896
16.1403	10.3157
16.1611	10.5614
16.1819	10.7793
16.2028	10.8164
16.2236	10.8308
16.2444	10.8437
16.2653	10.816
16.2861	10.6901
16.3069	10.6705
16.3278	10.8847
16.3486	11.6653
16.3694	12.9341
16.3903	14.0175
16.4111	15.668
16.4319	17.5629
16.4528	19.733
16.4736	19.5362
16.4944	21.6631
16.5153	22.4399
16.5361	22.0223
16.5569	21.6486
16.5778	20.3063
16.5986	19.111
16.6194	18.4697
16.6403	17.9096
16.6611	17.0588
16.6819	16.5513
16.7028	15.9159
16.7236	15.2729
16.7444	14.7052
16.7653	14.1877
16.7861	13.9113
16.8069	13.8901
16.8278	13.7692
16.8486	13.6295
16.8694	13.5694
16.8903	13.5915
16.9111	13.4559
16.9319	13.5093
16.9528	13.4385
16.9736	13.3959
16.9944	13.3018
17.0153	13.3879
17.0361	13.4407
17.0569	13.5235
17.0778	13.6066
17.0986	13.7423
17.1194	13.7928
17.1403	13.9577
17.1611	14.0003
17.1819	14.0047
17.2028	13.9732
17.2236	13.7695
17.2444	13.3822
17.2653	13.3078
17.2861	13.1504
17.3069	12.6929
17.3278	12.8107
17.3486	13.0603
17.3694	13.6195
17.3903	14.1593
17.4111	14.8518
17.4319	16.2381
17.4528	17.4489
17.4736	18.3592
17.4944	18.1322
17.5153	19.0328
17.5361	20.6406
17.5569	20.2259
17.5778	18.5088
17.5986	19.6682
17.6194	19.4734
17.6403	19.5323
17.6611	18.8171
17.6819	17.9287
17.7028	17.0623
17.7236	16.1757
17.7444	15.1298
17.7653	14.2742
17.7861	13.7384
17.8069	13.3124
17.8278	13.0996
17.8486	12.8907
17.8694	12.903
17.8903	12.8512
17.9111	12.8591
17.9319	12.8145
17.9528	12.8168
17.9736	12.7972
17.9944	12.689
18.0153	12.4829
18.0361	12.4431
18.0569	12.4354
18.0778	12.4593
18.0986	12.4662
18.1194	12.4495
18.1403	12.3122
18.1611	12.3258
18.1819	12.0804
18.2028	12.0065
18.2236	11.8109
18.2444	11.7485
18.2653	11.9439
18.2861	12.2277
18.3069	12.6644
18.3278	13.2828
18.3486	14.1906
18.3694	15.423
18.3903	16.8682
18.4111	17.943
18.4319	19.9642
18.4528	21.6795
18.4736	23.1276
18.4944	24.0873
18.5153	22.8312
18.5361	23.2548
18.5569	22.3633
18.5778	21.9144
18.5986	21.2453
18.6194	21.0339
18.6403	20.5232
18.6611	19.8126
18.6819	19.3458
18.7028	18.6133
18.7236	17.9925
18.7444	17.1266
18.7653	16.6706
18.7861	16.1908
18.8069	15.8808
18.8278	15.578
18.8486	15.5581
18.8694	15.4636
18.8903	15.3481
18.9111	15.2231
18.9319	15.2166
18.9528	15.1591
18.9736	15.172
18.9944	15.1847
19.0153	15.2017
19.0361	15.1086
19.0569	15.107
19.0778	15.0184
19.0986	15.0026
19.1194	15.0535
19.1403	15.0479
19.1611	14.9965
19.1819	15.1258
19.2028	15.1988
19.2236	15.3
19.2444	15.4434
19.2653	15.4486
19.2861	15.5335
19.3069	15.6202
19.3278	15.7856
19.3486	16.4288
19.3694	17.1772
19.3903	18.2979
19.4111	19.0972
19.4319	21.2446
19.4528	21.2892
19.4736	22.3363
19.4944	23.0052
19.5153	22.7994
19.5361	22.0378
19.5569	23.1818
19.5778	22.149
19.5986	22.3657
19.6194	21.4242
19.6403	21.5862
19.6611	21.3816
19.6819	21.1083
19.7028	20.4368
19.7236	19.5139
19.7444	18.708
19.7653	17.9816
19.7861	17.6017
19.8069	17.3893
19.8278	17.2931
19.8486	17.0979
19.8694	17.0872
19.8903	17.1402
19.9111	16.9829
19.9319	16.8942
19.9528	16.733
19.9736	16.6487
19.9944	16.5352
20.0153	16.6207
20.0361	16.7309
20.0569	16.7509
20.0778	16.8067
20.0986	16.7342
20.1194	16.6085
20.1403	16.6342
20.1611	16.5675
20.1819	16.5364
20.2028	16.4567
20.2236	16.3525
20.2444	16.3409
20.2653	16.4259
20.2861	16.3856
20.3069	16.2957
20.3278	16.1206
20.3486	16.2535
20.3694	16.6325
20.3903	17.0631
20.4111	17.8391
20.4319	18.9023
20.4528	19.6835
20.4736	22.383
20.4944	22.4729
20.5153	21.2171
20.5361	21.1688
20.5569	21.5142
20.5778	20.2583
20.5986	20.6713
20.6194	22.2211
20.6403	22.2374
20.6611	20.626
20.6819	19.0813
20.7028	18.0229
20.7236	17.2032
20.7444	16.3558
20.7653	15.6925
20.7861	15.3217
20.8069	15.0148
20.8278	14.8067
20.8486	14.5867
20.8694	14.4171
20.8903	14.1752
20.9111	14.0445
20.9319	13.9181
20.9528	13.6535
20.9736	13.4038
20.9944	13.3058
21.0153	13.1597
21.0361	13.1051
21.0569	12.9747
21.0778	13.1924
21.0986	13.4364
21.1194	13.6353
21.1403	13.5089
21.1611	13.3574
21.1819	13.3336
21.2028	12.8959
21.2236	12.5177
21.2444	12.3451
21.2653	11.9834
21.2861	11.8205
21.3069	11.5845
21.3278	11.5919
21.3486	12.4005
21.3694	14.1679
21.3903	14.9765
21.4111	16.2362
21.4319	19.0992
21.4528	19.2851
21.4736	17.6892
21.4944	18.7404
21.5153	19.071
21.5361	19.2461
21.5569	19.215
21.5778	18.5608
21.5986	17.9272
21.6194	17.2732
21.6403	16.9273
21.6611	16.1962
21.6819	15.8896
21.7028	15.5702
21.7236	14.797
21.7444	14.2376
21.7653	13.7503
21.7861	13.5227
21.8069	13.4316
21.8278	13.3538
21.8486	13.2894
21.8694	12.9351
21.8903	12.6071
21.9111	12.6681
21.9319	12.6368
21.9528	12.608
21.9736	12.5699
21.9944	12.5003
22.0153	12.3687
22.0361	12.3816
22.0569	12.3508
22.0778	12.3285
22.0986	12.1624
22.1194	12.1963
22.1403	12.2415
22.1611	12.2068
22.1819	12.3424
22.2028	12.3393
22.2236	12.423
22.2444	12.5697
22.2653	12.5538
22.2861	12.4627
22.3069	12.6083
22.3278	12.9104
22.3486	13.1255
22.3694	13.7004
22.3903	14.7164
22.4111	15.0056
22.4319	14.6101
22.4528	14.5531
22.4736	15.1034
22.4944	17.061
22.5153	16.3619
22.5361	16.4379
22.5569	15.0237
22.5778	14.265
22.5986	15.1208
22.6194	13.0558
22.6403	13.5828
22.6611	12.2219
22.6819	12.2827
22.7028	11.5268
22.7236	10.8472
22.7444	10.014
22.7653	9.52244
22.7861	9.13242
22.8069	8.88412
22.8278	8.59592
22.8486	8.42946
22.8694	8.39536
22.8903	8.2694
22.9111	8.07208
22.9319	7.93133
22.9528	7.86775
22.9736	7.75402
22.9944	7.56176
23.0153	7.40175
23.0361	7.29639
23.0569	7.09001
23.0778	7.01286
23.0986	6.79329
23.1194	6.70473
23.1403	6.68899
23.1611	6.76121
23.1819	6.79465
23.2028	6.74826
23.2236	6.73007
23.2444	6.69508
23.2653	6.83455
23.2861	6.94888
23.3069	7.0248
23.3278	7.26657
23.3486	7.63274
23.3694	8.37973
23.3903	9.68444
23.4111	10.43
23.4319	11.9916
23.4528	14.0504
23.4736	15.5621
23.4944	17.9153
23.5153	17.3356
23.5361	16.7006
23.5569	17.0734
23.5778	16.6568
23.5986	14.5819
23.6194	16.1195
23.6403	15.2634
23.6611	14.6471
23.6819	14.1566
23.7028	13.1124
23.7236	12.4014
23.7444	11.9443
23.7653	11.5458
23.7861	11.2159
23.8069	11.2102
23.8278	11.1132
23.8486	11.0291
23.8694	10.9394
23.8903	10.9948
23.9111	10.7944
23.9319	10.5194
23.9528	10.478
23.9736	10.2269
23.9944	9.87706
24.0153	9.77351
24.0361	9.96838
24.0569	10.0918
24.0778	10.0659
24.0986	9.83708
24.1194	9.74817
24.1403	9.71131
24.1611	9.82584
24.1819	9.84605
24.2028	9.88521
24.2236	9.78273
24.2444	9.88746
24.2653	10.1191
24.2861	10.1336
24.3069	10.2961
24.3278	10.4378
24.3486	10.8162
24.3694	11.3448
24.3903	11.9989
24.4111	12.4082
24.4319	13.0121
24.4528	13.8849
24.4736	14.7261
24.4944	15.2884
24.5153	17.2284
24.5361	17.8833
24.5569	18.0033
24.5778	18.3384
24.5986	18.431
24.6194	18.6953
24.6403	19.7928
24.6611	19.1411
24.6819	17.7351
24.7028	16.9933
24.7236	15.9105
24.7444	15.2476
24.7653	14.9855
24.7861	14.8153
24.8069	14.6334
24.8278	14.4924
24.8486	14.4732
24.8694	14.3195
24.8903	14.2734
24.9111	14.1606
24.9319	13.9815
24.9528	13.9355
24.9736	14.0216
24.9944	14.0372
25.0153	14.0135
25.0361	14.0147
25.0569	14.1593
25.0778	14.0902
25.0986	14.1212
25.1194	14.1183
25.1403	14.154
25.1611	14.0102
25.1819	13.9302
25.2028	13.8009
25.2236	13.6883
25.2444	13.5475
25.2653	13.5342
25.2861	13.5052
25.3069	13.4037
25.3278	13.4098
25.3486	13.5667
25.3694	14.0029
25.3903	14.6439
25.4111	16.0193
25.4319	17.8751
25.4528	19.4036
25.4736	18.7501
25.4944	19.1748
25.5153	18.8781
25.5361	20.3954
25.5569	20.6563
25.5778	19.5581
25.5986	17.9946
25.6194	18.232
25.6403	18.4034
25.6611	18.2078
25.6819	17.457
25.7028	16.8927
25.7236	16.4221
25.7444	16.0042
25.7653	15.712
25.7861	15.5072
25.8069	15.0281
25.8278	14.897
25.8486	14.918
25.8694	14.857
25.8903	14.3903
25.9111	13.3731
25.9319	12.7923
25.9528	12.4999
25.9736	11.8999
25.9944	11.2604
26.0153	10.9095
26.0361	10.5246
26.0569	10.2174
26.0778	9.81599
26.0986	9.42708
26.1194	9.24753
26.1403	8.95731
26.1611	8.76479
26.1819	8.61311
26.2028	8.50488
26.2236	8.30486
26.2444	8.05563
26.2653	7.75379
26.2861	7.74811
26.3069	7.62059
26.3278	7.58698
26.3486	8.08019
26.3694	9.53294
26.3903	10.9365
26.4111	12.1062
26.4319	13.7809
26.4528	17.9943
26.4736	19.1466
26.4944	19.4019
26.5153	18.5202
26.5361	18.3781
26.5569	16.6645
26.5778	16.0926
26.5986	17.5769
26.6194	17.8516
26.6403	18.2746
26.6611	17.0084
26.6819	15.7697
26.7028	14.7691
26.7236	13.87
26.7444	13.1459
26.7653	12.7796
26.7861	12.2868
26.8069	12.2748
26.8278	12.1994
26.8486	11.9898
26.8694	11.7295
26.8903	11.7412
26.9111	11.3662
26.9319	10.882
26.9528	10.6323
26.9736	10.7745
26.9944	10.5872
27.0153	10.4335
27.0361	10.2949
27.0569	10.0519
27.0778	9.97036
27.0986	10.0812
27.1194	10.2046
27.1403	10.2614
27.1611	10.3062
27.1819	10.4267
27.2028	10.6536
27.2236	10.9436
27.2444	10.9672
27.2653	10.7543
27.2861	10.6458
27.3069	10.8676
27.3278	11.0334
27.3486	11.2834
27.3694	11.8269
27.3903	12.4961
27.4111	13.2951
27.4319	13.9259
27.4528	14.4314
27.4736	14.4283
27.4944	14.7945
27.5153	15.27
27.5361	15.5806
27.5569	15.7721
27.5778	16.0492
27.5986	15.5324
27.6194	15.3201
27.6403	15.2916
27.6611	15.3434
27.6819	15.0203
27.7028	14.6065
27.7236	14.1024
27.7444	13.5605
27.7653	13.3266
27.7861	13.1827
27.8069	13.0442
27.8278	12.9631
27.8486	12.8623
27.8694	12.1524
27.8903	11.5782
27.9111	11.1801
27.9319	10.98
27.9528	10.852
27.9736	10.9556
27.9944	10.8807
28.0153	10.8873
28.0361	10.9195
28.0569	10.8941
28.0778	10.8534
28.0986	10.8987
28.1194	11.3008
28.1403	11.729
28.1611	12.0282
28.1819	12.0359
28.2028	12.2419
28.2236	12.4568
28.2444	12.59
28.2653	12.7934
28.2861	12.9444
28.3069	13.0008
28.3278	13.1482
28.3486	13.3861
28.3694	13.9281
28.3903	15.4147
28.4111	17.4115
28.4319	18.7397
28.4528	19.7885
28.4736	20.4226
28.4944	20.6976
28.5153	20.5789
28.5361	20.8471
28.5569	19.8289
28.5778	19.1313
28.5986	19.3838
28.6194	20.1611
28.6403	20.2046
28.6611	19.0461
28.6819	18.1171
28.7028	17.3373
28.7236	16.3737
28.7444	15.3421
28.7653	14.678
28.7861	14.2404
28.8069	13.7405
28.8278	13.4418
28.8486	13.2536
28.8694	12.9536
28.8903	12.7253
28.9111	12.5456
28.9319	12.3665
28.9528	12.2906
28.9736	12.1561
28.9944	11.966
29.0153	11.8491
29.0361	11.8694
29.0569	11.7964
29.0778	11.7048
29.0986	11.5997
29.1194	11.5111
29.1403	11.4555
29.1611	11.4455
29.1819	11.4332
29.2028	11.4048
29.2236	11.3646
29.2444	11.347
29.2653	11.382
29.2861	11.4051
29.3069	11.5977
29.3278	11.6686
29.3486	12.1224
29.3694	13.1888
29.3903	14.8236
29.4111	16.662
29.4319	18.017
29.4528	20.9197
29.4736	22.6325
29.4944	22.6495
29.5153	21.9564
29.5361	21.6219
29.5569	19.6969
29.5778	18.8784
29.5986	18.856
29.6194	19.4173
29.6403	18.6568
29.6611	17.6079
29.6819	16.7061
29.7028	15.8349
29.7236	14.6839
29.7444	13.8117
29.7653	13.241
29.7861	12.8011
29.8069	12.5666
29.8278	12.3755
29.8486	12.4416
29.8694	12.3044
29.8903	12.2848
29.9111	12.2999
29.9319	12.432
29.9528	12.6235
29.9736	12.904
29.9944	13.1422
30.0153	13.4763
30.0361	13.6418
30.0569	13.8647
30.0778	13.9724
30.0986	14.0614
30.1194	14.1774
30.1403	13.8275
30.1611	13.2409
30.1819	13.0456
30.2028	12.8645
30.2236	12.5348
30.2444	12.2771
30.2653	11.8486
30.2861	11.561
30.3069	11.4758
30.3278	11.6576
30.3486	11.8817
30.3694	12.4174
30.3903	13.3411
30.4111	13.6892
30.4319	14.5834
30.4528	15.9458
30.4736	15.711
30.4944	16.5123
30.5153	16.8
30.5361	16.7554
30.5569	17.2267
30.5778	17.1424
30.5986	16.4049
30.6194	15.7255
30.6403	15.5875
30.6611	14.6491
30.6819	13.9398
30.7028	13.4193
30.7236	12.7461
30.7444	12.3674
30.7653	12.0904
30.7861	11.8307
30.8069	11.7913
30.8278	11.7351
30.8486	11.8406
30.8694	11.9259
30.8903	11.8519
30.9111	11.8153
30.9319	11.8413
30.9528	11.9404
30.9736	12.1487
30.9944	12.282
31.0153	12.4974
31.0361	12.582
31.0569	12.6749
31.0778	12.8158
31.0986	12.9605
31.1194	12.9246
31.1403	13.1205
31.1611	13.2178
31.1819	13.2889
31.2028	13.4491
31.2236	13.6114
31.2444	13.7205
31.2653	13.8597
31.2861	14.0403
31.3069	14.0819
31.3278	14.1223
31.3486	14.2442
31.3694	14.6433
31.3903	15.2954
31.4111	15.6562
31.4319	16.4398
31.4528	17.9598
31.4736	18.8248
31.4944	19.2338
31.5153	20.954
31.5361	21.6452
31.5569	21.3748
31.5778	20.5456
31.5986	19.8428
31.6194	19.6522
31.6403	19.0268
31.6611	18.7143
31.6819	18.9266
31.7028	17.8375
31.7236	16.9639
31.7444	16.4013
31.7653	15.6392
31.7861	15.0937
31.8069	14.7416
31.8278	14.4345
31.8486	14.1116
31.8694	13.9052
31.8903	13.8043
31.9111	13.5892
31.9319	13.444
31.9528	13.3515
31.9736	13.2535
31.9944	13.0434
32.0153	12.8574
32.0361	12.8221
32.0569	12.5506
32.0778	12.3795
32.0986	12.1878
32.1194	12.1921
32.1403	12.2482
32.1611	12.3857
32.1819	12.7169
32.2028	12.8322
32.2236	13.088
32.2444	12.9409
32.2653	12.6833
32.2861	12.4675
32.3069	12.4374
32.3278	12.4757
32.3486	12.7894
32.3694	13.4796
32.3903	14.2616
32.4111	15.1555
32.4319	16.1699
32.4528	17.8839
32.4736	20.3913
32.4944	22.3624
32.5153	23.2265
32.5361	22.7458
32.5569	22.3989
32.5778	21.9315
32.5986	22.3556
32.6194	22.6869
32.6403	22.3542
32.6611	21.3678
32.6819	19.9584
32.7028	18.8518
32.7236	17.6971
32.7444	16.5943
32.7653	15.5805
32.7861	15.2009
32.8069	14.9575
32.8278	14.6959
32.8486	14.4426
32.8694	14.2355
32.8903	14.0855
32.9111	14.0433
32.9319	14.0828
32.9528	14.0059
32.9736	13.8664
32.9944	13.7812
33.0153	13.5085
33.0361	13.414
33.0569	13.3961
33.0778	13.3466
33.0986	13.2687
33.1194	13.0493
33.1403	12.8899
33.1611	12.8103
33.1819	12.7318
33.2028	12.5725
33.2236	12.5568
33.2444	12.7461
33.2653	13.1044
33.2861	13.2648
33.3069	13.2824
33.3278	13.3117
33.3486	13.5074
33.3694	14.9521
33.3903	16.5724
33.4111	16.499
33.4319	16.6628
33.4528	16.8794
33.4736	16.9705
33.4944	17.4641
33.5153	17.3939
33.5361	17.8803
33.5569	18.2164
33.5778	17.8733
33.5986	17.5745
33.6194	18.14
33.6403	17.7415
33.6611	17.0409
33.6819	16.1634
33.7028	15.35
33.7236	14.2769
33.7444	13.1898
33.7653	12.3638
33.7861	12.0363
33.8069	12.074
33.8278	11.9263
33.8486	11.7536
33.8694	11.652
33.8903	11.5122
33.9111	11.3909
33.9319	11.2063
33.9528	11.1652
33.9736	11.0658
33.9944	11.1511
34.0153	11.2666
34.0361	11.3074
34.0569	11.3962
34.0778	11.7329
34.0986	12.0402
34.1194	12.264
34.1403	12.089
34.1611	12.0539
34.1819	12.1353
34.2028	12.3677
34.2236	12.5322
34.2444	12.6756
34.2653	12.8519
34.2861	12.981
34.3069	13.1796
34.3278	13.2675
34.3486	13.6106
34.3694	14.2797
34.3903	14.7203
34.4111	15.7708
34.4319	17.1844
34.4528	17.5959
34.4736	17.4632
34.4944	17.7016
34.5153	17.0664
34.5361	16.9554
34.5569	17.0206
34.5778	16.6484
34.5986	16.3801
34.6194	16.4811
34.6403	16.1433
34.6611	15.48
34.6819	15.0233
34.7028	14.8593
34.7236	14.7074
34.7444	14.1058
34.7653	13.3542
34.7861	12.9997
34.8069	12.9296
34.8278	12.9576
34.8486	13.0276
34.8694	12.8493
34.8903	12.6247
34.9111	12.4891
34.9319	12.5211
34.9528	12.0927
34.9736	11.7197
34.9944	11.2243
35.0153	10.9441
35.0361	10.6125
35.0569	10.2528
35.0778	9.99233
35.0986	9.86329
35.1194	10.1135
35.1403	10.144
35.1611	10.0488
35.1819	9.90612
35.2028	9.72387
35.2236	9.51206
35.2444	9.92603
35.2653	10.1538
35.2861	10.1569
35.3069	10.1607
35.3278	10.2924
35.3486	10.4452
35.3694	10.7499
35.3903	11.2635
35.4111	11.7511
35.4319	11.966
35.4528	11.9219
35.4736	12.4926
35.4944	12.4807
35.5153	12.6806
35.5361	12.9536
35.5569	12.645
35.5778	12.7071
35.5986	12.4281
35.6194	12.4376
35.6403	12.7147
35.6611	11.8767
35.6819	11.0096
35.7028	10.548
35.7236	9.93438
35.7444	9.62651
35.7653	9.19428
35.7861	8.52713
35.8069	8.08493
35.8278	7.8362
35.8486	7.6525
35.8694	7.58225
35.8903	7.30434
35.9111	7.10784
35.9319	6.82697
35.9528	6.50327
35.9736	6.37443
35.9944	6.178
36.0153	5.86566
36.0361	5.58805
36.0569	5.36643
36.0778	5.4993
36.0986	5.60635
36.1194	5.52756
36.1403	5.59455
36.1611	5.552
36.1819	5.37601
36.2028	5.38387
36.2236	5.45857
36.2444	5.3293
36.2653	5.13307
36.2861	4.85303
36.3069	4.86452
36.3278	5.20483
36.3486	5.358
36.3694	6.34131
36.3903	7.81986
36.4111	8.46961
36.4319	10.9229
36.4528	13.7819
36.4736	15.1779
36.4944	15.6806
36.5153	16.1002
36.5361	15.3903
36.5569	14.6365
36.5778	13.1829
36.5986	12.1808
36.6194	12.7726
36.6403	12.5167
36.6611	12.8561
36.6819	12.0998
36.7028	11.1034
36.7236	9.99154
36.7444	9.22831
36.7653	8.52351
36.7861	8.00002
36.8069	7.35884
36.8278	6.92152
36.8486	6.55376
36.8694	6.23148
36.8903	5.95589
36.9111	5.71327
36.9319	5.40652
36.9528	5.19977
36.9736	5.01335
36.9944	4.96406
37.0153	5.13276
37.0361	5.02975
37.0569	4.96741
37.0778	5.00192
37.0986	5.21261
37.1194	5.65634
37.1403	5.96693
37.1611	5.96664
37.1819	5.98956
37.2028	6.05536
37.2236	6.29681
37.2444	6.45112
37.2653	6.63855
37.2861	7.01272
37.3069	7.2645
37.3278	7.42542
37.3486	7.57203
37.3694	7.877
37.3903	8.06003
37.4111	8.30168
37.4319	9.00657
37.4528	9.09541
37.4736	9.36224
37.4944	9.8432
37.5153	11.2135
37.5361	11.2786
37.5569	10.7053
37.5778	10.4864
37.5986	9.88092
37.6194	9.77051
37.6403	9.91455
37.6611	9.9018
37.6819	9.75404
37.7028	9.72013
37.7236	9.79698
37.7444	9.40243
37.7653	9.07744
37.7861	8.69565
37.8069	8.41485
37.8278	8.3587
37.8486	8.3554
37.8694	8.36655
37.8903	8.41277
37.9111	8.41086
37.9319	8.24679
37.9528	8.05223
37.9736	7.97008
37.9944	7.88589
38.0153	7.85424
38.0361	7.69071
38.0569	7.19881
38.0778	6.89706
38.0986	6.74974
38.1194	6.48748
38.1403	6.226
38.1611	5.91457
38.1819	5.73224
38.2028	5.56018
38.2236	5.39503
38.2444	5.43998
38.2653	5.3656
38.2861	5.05679
38.3069	4.46069
38.3278	4.07598
38.3486	4.34414
38.3694	4.46089
38.3903	4.72371
38.4111	6.28124
38.4319	8.65202
38.4528	12.1062
38.4736	14.3503
38.4944	14.4624
38.5153	14.3197
38.5361	13.6242
38.5569	11.8789
38.5778	11.7113
38.5986	13.0818
38.6194	11.6374
38.6403	11.227
38.6611	10.8388
38.6819	10.2945
38.7028	9.5495
38.7236	9.06956
38.7444	8.70636
38.7653	8.43496
38.7861	8.36741
38.8069	8.57528
38.8278	8.79739
38.8486	9.11348
38.8694	9.27933
38.8903	9.46498
38.9111	9.50494
38.9319	9.64612
38.9528	9.68965
38.9736	9.72354
38.9944	9.84721
39.0153	9.94234
39.0361	9.99569
39.0569	10.0466
39.0778	10.0959
39.0986	10.1974
39.1194	10.0617
39.1403	10.0254
39.1611	9.98519
39.1819	10.16
39.2028	10.3576
39.2236	10.5213
39.2444	10.801
39.2653	10.9412
39.2861	10.8839
39.3069	10.7542
39.3278	10.758
39.3486	10.7241
39.3694	10.8872
39.3903	11.2289
39.4111	11.5787
39.4319	12.2281
39.4528	12.8648
39.4736	13.8785
39.4944	14.1108
39.5153	15.4639
39.5361	15.8251
39.5569	15.9456
39.5778	15.3263
39.5986	14.9936
39.6194	14.291
39.6403	13.6057
39.6611	12.878
39.6819	12.0418
39.7028	11.1112
39.7236	10.0064
39.7444	9.32254
39.7653	8.91886
39.7861	8.65206
39.8069	8.63283
39.8278	8.65796
39.8486	8.64721
39.8694	8.29674
39.8903	7.87149
39.9111	7.65297
39.9319	7.35789
39.9528	7.10393
39.9736	7.07955
39.9944	6.94157
40.0153	6.82587
40.0361	6.8147
40.0569	6.80586
40.0778	6.79526
40.0986	6.8312
40.1194	6.7563
40.1403	6.73855
40.1611	6.63655
40.1819	6.59313
40.2028	6.42816
40.2236	6.22925
40.2444	6.38701
40.2653	6.36713
40.2861	6.3656
40.3069	6.26986
40.3278	6.24807
40.3486	6.40714
40.3694	7.01768
40.3903	8.70053
40.4111	9.89037
40.4319	11.619
40.4528	13.8006
40.4736	15.7085
40.4944	15.39
40.5153	15.7977
40.5361	16.1335
40.5569	15.7035
40.5778	15.7261
40.5986	15.6911
40.6194	14.9359
40.6403	15.1949
40.6611	14.7563
40.6819	14.0187
40.7028	13.1528
40.7236	12.5976
40.7444	12.0926
40.7653	11.8906
40.7861	11.5987
40.8069	11.5001
40.8278	11.5239
40.8486	11.6258
40.8694	11.6124
40.8903	11.8099
40.9111	11.6377
40.9319	11.2429
40.9528	10.9026
40.9736	10.8826
40.9944	10.8366
41.0153	10.7247
41.0361	10.7045
41.0569	10.676
41.0778	10.6237
41.0986	10.6002
41.1194	10.5961
41.1403	10.4569
41.1611	10.4763
41.1819	10.4751
41.2028	10.428
41.2236	10.367
41.2444	10.3481
41.2653	10.3532
41.2861	10.3638
41.3069	10.3474
41.3278	10.341
41.3486	10.2381
41.3694	10.1968
41.3903	10.2433
41.4111	10.6485
41.4319	10.867
41.4528	11.2947
41.4736	11.9983
41.4944	13.1579
41.5153	13.6081
41.5361	14.843
41.5569	14.1576
41.5778	14.2028
41.5986	13.3493
41.6194	12.9718
[truncated: 7,857 more rows]

## Sheet: North_Sweden_early_14
Days_from_sowing	Temperature_oC
0	13.51
0.0416667	13.39
0.0833333	12.9
0.125	12.53
0.166667	12.25
0.208333	12.15
0.25	12.57
0.291667	13.29
0.333333	13.49
0.375	13.79
0.416667	14.73
0.458333	14.92
0.5	15.09
0.541667	15.31
0.583333	15.48
0.625	15.26
0.666667	15.07
0.708333	14.73
0.75	14.46
0.791667	14.13
0.833333	13.94
0.875	13.83
0.916667	13.75
0.958333	13.69
1	13.6
1.04167	13.52
1.08333	13.35
1.125	13.23
1.16667	13.13
1.20833	13.15
1.25	13.34
1.29167	13.96
1.33333	14.25
1.375	15.4
1.41667	19.73
1.45833	21.42
1.5	22.77
1.54167	20.38
1.58333	18.23
1.625	17.31
1.66667	16.13
1.70833	15.69
1.75	15.34
1.79167	14.47
1.83333	13.87
1.875	13.67
1.91667	13.69
1.95833	13.65
2	13.28
2.04167	12.91
2.08333	12.58
2.125	12.27
2.16667	12.25
2.20833	12.52
2.25	12.9
2.29167	13.4
2.33333	13.62
2.375	13.8
2.41667	14.35
2.45833	16.77
2.5	15.47
2.54167	14.64
2.58333	14.73
2.625	14.36
2.66667	14.34
2.70833	13.61
2.75	12.95
2.79167	12.4
2.83333	12.01
2.875	11.99
2.91667	12.09
2.95833	12.07
3	12.03
3.04167	11.98
3.08333	11.98
3.125	11.98
3.16667	11.9
3.20833	11.98
3.25	12.25
3.29167	12.71
3.33333	13.75
3.375	14.72
3.41667	20.82
3.45833	22.27
3.5	22.75
3.54167	19.49
3.58333	17.6
3.625	16.8
3.66667	15.97
3.70833	15.17
3.75	14.72
3.79167	14.35
3.83333	14.06
3.875	13.67
3.91667	13.23
3.95833	12.83
4	12.98
4.04167	12.99
4.08333	12.95
4.125	12.64
4.16667	12.71
4.20833	12.75
4.25	13.03
4.29167	13.41
4.33333	14.4
4.375	15.28
4.41667	20.1
4.45833	21.34
4.5	19.88
4.54167	17.82
4.58333	16.98
4.625	16.02
4.66667	15.23
4.70833	14.74
4.75	14.34
4.79167	13.92
4.83333	13.52
4.875	13.35
4.91667	13.1
4.95833	13.19
5	13.22
5.04167	13.17
5.08333	13.07
5.125	12.95
5.16667	12.8
5.20833	12.58
5.25	12.91
5.29167	13.62
5.33333	14.52
5.375	15.18
5.41667	20.64
5.45833	23.53
5.5	24.43
5.54167	20.68
5.58333	18.45
5.625	17.54
5.66667	17.21
5.70833	16.41
5.75	15.78
5.79167	15.22
5.83333	14.88
5.875	14.52
5.91667	14.35
5.95833	14.23
6	14.21
6.04167	14.07
6.08333	13.92
6.125	13.88
6.16667	13.89
6.20833	13.73
6.25	14.13
6.29167	14.68
6.33333	15.6
6.375	16.36
6.41667	20.6
6.45833	22.63
6.5	24.43
6.54167	21.44
6.58333	19.48
6.625	18.54
6.66667	17.73
6.70833	16.98
6.75	16.45
6.79167	15.81
6.83333	15.35
6.875	15.06
6.91667	14.78
6.95833	14.61
7	14.62
7.04167	14.57
7.08333	14.21
7.125	13.82
7.16667	13.64
7.20833	13.51
7.25	13.75
7.29167	14.45
7.33333	14.75
7.375	15.77
7.41667	20.22
7.45833	22.72
7.5	23.64
7.54167	20.9
7.58333	19.13
7.625	19.02
7.66667	17.98
7.70833	17.63
7.75	16.96
7.79167	16.61
7.83333	16.15
7.875	15.53
7.91667	15.11
7.95833	15.05
8	14.9
8.04167	14.89
8.08333	14.6
8.125	14.27
8.16667	14.02
8.20833	14.05
8.25	14.22
8.29167	14.5
8.33333	15.2
8.375	16.35
8.41667	19.86
8.45833	22.52
8.5	26.06
8.54167	20.82
8.58333	18.93
8.625	18.39
8.66667	17.45
8.70833	16.84
8.75	16.27
8.79167	15.69
8.83333	15.13
8.875	14.78
8.91667	14.42
8.95833	14.14
9	13.9
9.04167	13.81
9.08333	13.59
9.125	13.37
9.16667	13.4
9.20833	13.68
9.25	13.91
9.29167	14.27
9.33333	14.85
9.375	16.04
9.41667	18.76
9.45833	21.1
9.5	25.16
9.54167	20.39
9.58333	18.56
9.625	17.85
9.66667	16.89
9.70833	16.25
9.75	15.76
9.79167	15.58
9.83333	15.65
9.875	15.61
9.91667	15.53
9.95833	15.48
10	15.39
10.0417	15.3
10.0833	15.21
10.125	15.14
10.1667	15.08
10.2083	15.03
10.25	15.04
10.2917	15.24
10.3333	15.58
10.375	16.79
10.4167	18.45
10.4583	17.85
10.5	17.45
10.5417	17.29
10.5833	17.58
10.625	17.21
10.6667	16.03
10.7083	15.39
10.75	14.98
10.7917	14.58
10.8333	14.37
10.875	13.95
10.9167	13.58
10.9583	13.47
11	13.78
11.0417	13.95
11.0833	14.05
11.125	14.16
11.1667	14.14
11.2083	14.11
11.25	14.23
11.2917	14.7
11.3333	15.06
11.375	15.74
11.4167	16.59
11.4583	17.83
11.5	18.1
11.5417	17.19
11.5833	16.58
11.625	16.55
11.6667	16.11
11.7083	15.78
11.75	15.47
11.7917	15.32
11.8333	15.07
11.875	14.75
11.9167	14.78
11.9583	14.93
12	14.97
12.0417	15.05
12.0833	14.87
12.125	14.91
12.1667	14.95
12.2083	15.03
12.25	15.08
12.2917	15.28
12.3333	15.38
12.375	15.88
12.4167	16.15
12.4583	16.09
12.5	16.62
12.5417	16.62
12.5833	16.25
12.625	15.96
12.6667	15.79
12.7083	15.7
12.75	15.46
12.7917	15.31
12.8333	15.2
12.875	15.14
12.9167	15.1
12.9583	14.96
13	14.76
13.0417	14.46
13.0833	14.42
13.125	14.41
13.1667	14.42
13.2083	14.48
13.25	14.55
13.2917	14.7
13.3333	14.85
13.375	14.82
13.4167	16.31
13.4583	18.36
13.5	22.06
13.5417	18.81
13.5833	18.17
13.625	17.99
13.6667	16.89
13.7083	16.13
13.75	15.33
13.7917	14.74
13.8333	14.3
13.875	13.88
13.9167	13.58
13.9583	13.31
14	13
14.0417	12.69
14.0833	12.41
14.125	12.12
14.1667	11.94
14.2083	11.81
14.25	11.86
14.2917	21.96
14.3333	14.03
14.375	19.08
14.4167	26.62
14.4583	23.21
14.5	38.68
14.5417	48.19
14.5833	43.12
14.625	28.01
14.6667	24.93
14.7083	19.77
14.75	16.73
14.7917	14.99
14.8333	13.27
14.875	12.84
14.9167	13.2
14.9583	13.46
15	13.54
15.0417	13.51
15.0833	13.29
15.125	13.03
15.1667	12.67
15.2083	12.27
15.25	11.86
15.2917	12.78
15.3333	14.62
15.375	16.2
15.4167	19.13
15.4583	23.83
15.5	20.96
15.5417	24.07
15.5833	27.79
15.625	22.58
15.6667	23.4
15.7083	18.15
15.75	14.61
15.7917	12.21
15.8333	10.38
15.875	9.27
15.9167	8.54
15.9583	7.9
16	7.33
16.0417	6.88
16.0833	6.5
16.125	6.1
16.1667	5.73
16.2083	5.46
16.25	5.77
16.2917	6.45
16.3333	7.58
16.375	9.94
16.4167	20.56
16.4583	24.94
16.5	28.09
16.5417	29.76
16.5833	29.6
16.625	27.43
16.6667	24.12
16.7083	19.75
16.75	14.81
16.7917	12.88
16.8333	12.11
16.875	10.56
16.9167	9.79
16.9583	9.26
17	8.77
17.0417	9.7
17.0833	10.16
17.125	10.63
17.1667	10.87
17.2083	9.4
17.25	11.07
17.2917	12.61
17.3333	12.57
17.375	13.76
17.4167	18.95
17.4583	26.05
17.5	28.93
17.5417	28.41
17.5833	30.75
17.625	26.08
17.6667	24.88
17.7083	20.83
17.75	15.96
17.7917	13.15
17.8333	11.36
17.875	9.86
17.9167	8.84
17.9583	8.08
18	7.42
18.0417	6.88
18.0833	6.4
18.125	6.01
18.1667	5.57
18.2083	5.13
18.25	5.37
18.2917	6.06
18.3333	7
18.375	9.12
18.4167	20.72
18.4583	25.05
18.5	27.93
18.5417	28.04
18.5833	27.91
18.625	26.33
18.6667	22.77
18.7083	18.28
18.75	13.46
18.7917	11.16
18.8333	9.95
18.875	9.12
18.9167	8.5
18.9583	8.09
19	8.01
19.0417	9.19
19.0833	9.33
19.125	8.43
19.1667	8.95
19.2083	9.48
19.25	10.39
19.2917	11.39
19.3333	12.61
19.375	14.17
19.4167	15.7
19.4583	17.57
19.5	21.66
19.5417	20.63
19.5833	25.13
19.625	25
19.6667	21.69
19.7083	17.59
19.75	13.56
19.7917	12.94
19.8333	12.54
19.875	11.16
19.9167	11.44
19.9583	11.8
20	12.36
20.0417	12.59
20.0833	12.55
20.125	12.1
20.1667	11.69
20.2083	11.73
20.25	12.62
20.2917	13.69
20.3333	15.22
20.375	17.44
20.4167	22.81
20.4583	27.81
20.5	30.13
20.5417	31.01
20.5833	30.65
20.625	27.07
20.6667	23.53
20.7083	19.18
20.75	14.86
20.7917	13.03
20.8333	12.28
20.875	11.49
20.9167	10.86
20.9583	10
21	9.2
21.0417	8.47
21.0833	8
21.125	8.22
21.1667	9.32
21.2083	10.19
21.25	10.55
21.2917	11.81
21.3333	13.53
21.375	15.88
21.4167	18.01
21.4583	20.02
21.5	21.47
21.5417	27.28
21.5833	28.26
21.625	25.21
21.6667	22.49
21.7083	17.82
21.75	13.57
21.7917	11.97
21.8333	10.62
21.875	10.03
21.9167	9.16
21.9583	8.36
22	8.01
22.0417	7.62
22.0833	7.73
22.125	7.97
22.1667	7.74
22.2083	8.23
22.25	8.98
22.2917	10.79
22.3333	12.31
22.375	14.42
22.4167	18.69
22.4583	25.75
22.5	27.06
22.5417	29.71
22.5833	29.42
22.625	26.31
22.6667	22.54
22.7083	17.57
22.75	13.67
22.7917	11.74
22.8333	10.81
22.875	9.99
22.9167	9.06
22.9583	8.23
23	7.88
23.0417	7.46
23.0833	7.27
23.125	7.37
23.1667	7.08
23.2083	7.46
23.25	8.19
23.2917	9.01
23.3333	10.93
23.375	12.89
23.4167	22.08
23.4583	25.74
23.5	27.93
23.5417	28.29
23.5833	26.45
23.625	24.98
23.6667	21.58
23.7083	16.57
23.75	13.22
23.7917	11.5
23.8333	10.79
23.875	10.29
23.9167	9.04
23.9583	8.7
24	9.58
24.0417	9.6
24.0833	10.4
24.125	10.64
24.1667	10.86
24.2083	11.03
24.25	10.96
24.2917	11.26
24.3333	12.17
24.375	13.17
24.4167	14.08
24.4583	14.71
24.5	16.42
24.5417	16.9
24.5833	17.09
24.625	15.2
24.6667	14.24
24.7083	12.71
24.75	10.65
24.7917	9.59
24.8333	9.47
24.875	9.45
24.9167	8.75
24.9583	8.15
25	7.72
25.0417	7.34
25.0833	7.02
25.125	5.48
25.1667	3.95
25.2083	3.03
25.25	2.56
25.2917	2.75
25.3333	3.43
25.375	5.36
25.4167	15.01
25.4583	16.27
25.5	19.71
25.5417	16.5
25.5833	13.42
25.625	10.71
25.6667	10.6
25.7083	9.37
25.75	6.85
25.7917	6.65
25.8333	5.06
25.875	3.15
25.9167	2.41
25.9583	1.86
26	1.41
26.0417	1.02
26.0833	0.68
26.125	0.29
26.1667	-0.09
26.2083	-0.43
26.25	-0.45
26.2917	-0.14
26.3333	0.35
26.375	1.4
26.4167	11.41
26.4583	16.2
26.5	18.9
26.5417	20.66
26.5833	20.51
26.625	18.88
26.6667	15.39
26.7083	9.12
26.75	5.02
26.7917	3.03
26.8333	1.76
26.875	0.96
26.9167	0.46
26.9583	0.04
27	-0.41
27.0417	-0.73
27.0833	-1.06
27.125	-1.38
27.1667	-1.64
27.2083	-1.83
27.25	-1.84
27.2917	-1.3
27.3333	-0.69
27.375	1.13
27.4167	11.8
27.4583	16.5
27.5	19.11
27.5417	15.42
27.5833	11.38
27.625	9.33
27.6667	7.75
27.7083	6.76
27.75	5.66
27.7917	5.55
27.8333	5.5
27.875	5.45
27.9167	5.41
27.9583	5.41
28	5.39
28.0417	5.28
28.0833	5.12
28.125	5.12
28.1667	4.68
28.2083	4.44
28.25	4.63
28.2917	4.29
28.3333	4.18
28.375	5.97
28.4167	12.87
28.4583	18.5
28.5	21.11
28.5417	16.23
28.5833	14.79
28.625	13.25
28.6667	11.14
28.7083	9.32
28.75	6.76
28.7917	5.83
28.8333	6.03
28.875	6.07
28.9167	5.73
28.9583	5
29	5.08
29.0417	4.91
29.0833	4.91
29.125	5.38
29.1667	6.84
29.2083	7.21
29.25	7.43
29.2917	7.93
29.3333	8.73
29.375	9.65
29.4167	10.6
29.4583	11.32
29.5	10.11
29.5417	10.09
29.5833	10.32
29.625	10.1
29.6667	10.03
29.7083	9.32
29.75	8.46
29.7917	7.58
29.8333	6.33
29.875	5.5
29.9167	5.21
29.9583	4.85
30	4.87
30.0417	4.78
30.0833	4.95
30.125	4.92
30.1667	4.86
30.2083	4.24
30.25	4.36
30.2917	4.98
30.3333	5.35
30.375	7.32
30.4167	12.39
30.4583	10.87
30.5	12.81
30.5417	13.44
30.5833	16.42
30.625	14.18
30.6667	11.45
30.7083	8.57
30.75	7.06
30.7917	6.65
30.8333	6.08
30.875	5.53
30.9167	5.12
30.9583	4.83
31	4.93
31.0417	4.96
31.0833	5.27
31.125	6.37
31.1667	7.48
31.2083	8.11
31.25	8.53
31.2917	9.03
31.3333	9.41
31.375	9.78
31.4167	11.02
31.4583	11.98
31.5	12.02
31.5417	11.24
31.5833	11.28
31.625	15.32
31.6667	13.47
31.7083	10.72
31.75	10.34
31.7917	9.42
31.8333	8.1
31.875	6.51
31.9167	5.48
31.9583	4.89
32	5.11
32.0417	5.11
32.0833	5.16
32.125	5.58
32.1667	5.59
32.2083	5.03
32.25	4.92
32.2917	5.24
32.3333	5.6
32.375	7.88
32.4167	12.94
32.4583	14.51
32.5	15
32.5417	15.08
32.5833	14.6
32.625	13.31
32.6667	12.62
32.7083	9.16
32.75	7.4
32.7917	6.55
32.8333	5.85
32.875	5.33
32.9167	4.91
32.9583	4.56
33	4.01
33.0417	3.16
33.0833	2.83
33.125	2.37
33.1667	2.23
33.2083	1.78
33.25	1.58
33.2917	1.77
33.3333	2.37
33.375	4.66
33.4167	13.06
33.4583	16.84
33.5	19.31
33.5417	20.48
33.5833	19.3
33.625	17.52
33.6667	13.99
33.7083	8.61
33.75	5.98
33.7917	4.65
33.8333	3.58
33.875	2.81
33.9167	2.18
33.9583	1.73
34	1.29
34.0417	1.01
34.0833	0.72
34.125	0.61
34.1667	0.5
34.2083	0.48
34.25	0.85
34.2917	1.45
34.3333	3.94
34.375	6.69
34.4167	7.77
34.4583	12.58
34.5	16.45
34.5417	18.45
34.5833	18.04
34.625	17.17
34.6667	13.34
34.7083	8.86
34.75	7.28
34.7917	6.5
34.8333	6.64
34.875	6.42
34.9167	6.95
34.9583	6.99
35	7.2
35.0417	7.32
35.0833	7.41
35.125	7.76
35.1667	7.64
35.2083	7.49
35.25	6.99
35.2917	7.58
35.3333	8.21
35.375	10.24
35.4167	14.36
35.4583	15.76
35.5	16.44
35.5417	19.85
35.5833	20.45
35.625	18.92
35.6667	14.74
35.7083	9.63
35.75	7.22
35.7917	5.88
35.8333	4.91
35.875	4.1
35.9167	3.58
35.9583	3.01
36	2.58
36.0417	2.24
36.0833	1.91
36.125	1.71
36.1667	1.99
36.2083	1.89
36.25	1.76
36.2917	3.26
36.3333	5.94
36.375	7.22
36.4167	7.91
36.4583	9.05
36.5	9.79
36.5417	10.24
36.5833	10.05
36.625	10.09
36.6667	9.97
36.7083	9.62
36.75	9.45
36.7917	9.44
36.8333	9.41
36.875	9.27
36.9167	8.66
36.9583	7.27
37	7.03
37.0417	7.33
37.0833	6.52
37.125	6.78
37.1667	6.44
37.2083	6.08
37.25	5.96
37.2917	5.99
37.3333	7.15
37.375	9.37
37.4167	11.83
37.4583	15.29
37.5	18.04
37.5417	19.5
37.5833	19.96
37.625	18.5
37.6667	13.27
37.7083	11.35
37.75	10.69
37.7917	10.37
37.8333	10.24
37.875	10.12
37.9167	10.01
37.9583	10.09
38	10.09
38.0417	10.03
38.0833	9.92
38.125	9.98
38.1667	10.12
38.2083	10.22
38.25	10.34
38.2917	10.51
38.3333	10.63
38.375	10.74
38.4167	10.89
38.4583	10.95
38.5	11.31
38.5417	11.44
38.5833	11.12
38.625	11.08
38.6667	10.71
38.7083	10.4
38.75	9.96
38.7917	9.72
38.8333	9.59
38.875	9.5
38.9167	9.28
38.9583	9.28
39	8.97
39.0417	8.96
39.0833	8.82
39.125	8.14
39.1667	7.43
39.2083	7.26
39.25	5.91
39.2917	7.46
39.3333	8.39
39.375	9.28
39.4167	11.18
39.4583	12.01
39.5	11.85
39.5417	10.36
39.5833	9.74
39.625	9.13
39.6667	8.31
39.7083	7.77
39.75	7.49
39.7917	7.38
39.8333	7.3
39.875	7.13
39.9167	7.1
39.9583	7.02
40	6.95
40.0417	6.93
40.0833	6.84
40.125	6.53
40.1667	6.68
40.2083	6.13
40.25	6.4
40.2917	6.63
40.3333	7.07
40.375	7.21
40.4167	6.88
40.4583	6.82
40.5	6.87
40.5417	6.8
40.5833	6.83
40.625	6.57
40.6667	6.36
40.7083	6.11
40.75	6.34
40.7917	6.63
40.8333	6.83
40.875	7.03
40.9167	7.26
40.9583	7.35
41	7.4
41.0417	7.51
41.0833	7.52
41.125	7.46
41.1667	7.4
41.2083	7.36
41.25	7.29
41.2917	7.23
41.3333	7.23
41.375	7.17
41.4167	7.12
41.4583	7.07
41.5	7.03
41.5417	7.22
41.5833	7.24
41.625	7.61
41.6667	7.68
41.7083	7.14
41.75	6.88
41.7917	6.8
41.8333	6.74
41.875	6.59
41.9167	6.46
41.9583	6.6
42	6.56
42.0417	6.56
42.0833	6.64
42.125	6.63
42.1667	6.55
42.2083	6.36
42.25	6.23
42.2917	6.54
42.3333	7.83
42.375	8.17
42.4167	8.11
42.4583	7.97
42.5	7.57
42.5417	7.29
42.5833	7.03
42.625	6.79
42.6667	6.57
42.7083	6.39
42.75	6.27
42.7917	6.26
42.8333	6.36
42.875	6.38
42.9167	6.47
42.9583	6.67
43	6.92
43.0417	7.14
43.0833	7.26
43.125	7.28
43.1667	7.3
43.2083	6.98
43.25	6.61
43.2917	7.16
43.3333	8.16
43.375	8.73
43.4167	8.78
43.4583	8.88
43.5	9.48
43.5417	9.49
43.5833	9.05
43.625	8.86
43.6667	8.17
43.7083	7.75
43.75	7.46
43.7917	7.23
43.8333	6.95
43.875	6.76
43.9167	6.59
43.9583	6.43
44	6.25
44.0417	6.09
44.0833	5.97
44.125	5.75
44.1667	5.83
44.2083	5.61
44.25	5.71
44.2917	5.87
44.3333	6.27
44.375	6.69
44.4167	7.01
44.4583	7.26
44.5	7.45
44.5417	7.69
44.5833	7.75
44.625	7.5
44.6667	7.17
44.7083	6.65
44.75	6.47
44.7917	6.43
44.8333	6.43
44.875	6.46
44.9167	6.47
44.9583	6.46
45	6.48
45.0417	6.51
45.0833	6.54
45.125	6.58
45.1667	6.62
45.2083	6.59
45.25	6.58
45.2917	6.5
45.3333	6.67
45.375	6.87
45.4167	7.18
45.4583	7.33
45.5	7.2
45.5417	7.06
45.5833	7.04
45.625	7.08
45.6667	6.74
45.7083	6.53
45.75	6.12
45.7917	5.83
45.8333	5.71
45.875	5.67
45.9167	5.6
45.9583	5.54
46	5.49
46.0417	5.4
46.0833	5.31
46.125	5.3
46.1667	5.3
46.2083	5.26
46.25	5.19
46.2917	5.34
46.3333	5.82
46.375	6.82
46.4167	8.57
46.4583	8.72
46.5	8.93
46.5417	8.69
46.5833	8.18
46.625	7.68
46.6667	7.04
46.7083	6.44
46.75	5.97
46.7917	5.68
46.8333	5.76
46.875	5.45
46.9167	5.09
46.9583	4.72
47	4.33
47.0417	4.59
47.0833	4.66
47.125	4.67
47.1667	4.93
47.2083	5.17
47.25	5.31
47.2917	5.51
47.3333	5.85
47.375	6.64
47.4167	8.42
47.4583	8.33
47.5	8.48
47.5417	8.11
47.5833	8.14
47.625	7.55
47.6667	6.66
47.7083	6.1
47.75	5.87
47.7917	5.61
47.8333	4.69
47.875	4.17
47.9167	3.46
47.9583	3.81
48	3.95
48.0417	4.1
48.0833	4.03
48.125	3.76
48.1667	3.77
48.2083	3.63
48.25	2.82
48.2917	3.06
48.3333	2.35
48.375	3.08
48.4167	6.25
48.4583	8.78
48.5	7.99
48.5417	6.05
48.5833	5.52
48.625	7.29
48.6667	4.82
48.7083	3.29
48.75	3.23
48.7917	3.19
48.8333	3.26
48.875	3.14
48.9167	2.82
48.9583	2.15
49	2.54
49.0417	2.66
49.0833	2.51
49.125	2.12
49.1667	2.18
49.2083	1.96
49.25	2.18
49.2917	2.31
49.3333	2.53
49.375	2.72
49.4167	4.05
49.4583	5.28
49.5	5.24
49.5417	5.87
49.5833	5.27
49.625	4.42
49.6667	3.63
49.7083	3.07
49.75	2.81
49.7917	2.59
49.8333	2.44
49.875	2.33
49.9167	2.21
49.9583	2.09
50	1.72
50.0417	1.49
50.0833	1.27
50.125	0.39
50.1667	0.09
50.2083	-0.07
50.25	-0.3
50.2917	-0.46
50.3333	-0.49
50.375	-0.17
50.4167	1.01
50.4583	4.53
50.5	7.97
50.5417	9.22
50.5833	9.27
50.625	7.38
50.6667	3.19
50.7083	0.96
50.75	0.49
50.7917	0.15
50.8333	-0.17
50.875	-0.52
50.9167	-0.86
50.9583	-1.08
51	-1.25
51.0417	-0.21
51.0833	0.06
51.125	0.29
51.1667	0.51
51.2083	0.57
51.25	0.81
51.2917	0.83
51.3333	0.66
51.375	1.42
51.4167	3.39
51.4583	4.79
51.5	6.24
51.5417	5.77
51.5833	6
51.625	5.14
51.6667	3.94
51.7083	4
51.75	4.5
51.7917	4.04
51.8333	4.74
51.875	4.98
51.9167	5.2
51.9583	5.4
52	5.74
52.0417	6.19
52.0833	6.62
52.125	6.63
52.1667	6.7
52.2083	6.69
52.25	6.65
52.2917	6.7
52.3333	7.14
52.375	7.98
52.4167	9.14
52.4583	9.32
52.5	10.09
52.5417	10.31
52.5833	9.09
52.625	8.24
52.6667	7.27
52.7083	6.46
52.75	5.65
52.7917	5.23
52.8333	4.63
52.875	4.31
52.9167	4.21
52.9583	4
53	3.93
53.0417	3.87
53.0833	3.74
53.125	3.69
53.1667	3.6
53.2083	3.55
53.25	3.51
53.2917	3.59
53.3333	3.99
53.375	4.83
53.4167	5.41
53.4583	5.78
53.5	6.17
53.5417	5.85
53.5833	6.07
53.625	5.49
53.6667	4.76
53.7083	4.41
53.75	4.2
53.7917	4.03
53.8333	3.66
53.875	3.83
53.9167	3.8
53.9583	3.64
54	3.62
54.0417	3.58
54.0833	3.51
54.125	3.43
54.1667	3.41
54.2083	3.32
54.25	3.22
54.2917	3.27
54.3333	3.44
54.375	3.6
54.4167	4.15
54.4583	4.88
54.5	4.64
54.5417	4.49
54.5833	4.13
54.625	3.29
54.6667	2.76
54.7083	2.42
54.75	2.23
54.7917	2.14
54.8333	1.98
54.875	1.9
54.9167	1.75
54.9583	1.63
55	1.39
55.0417	1.42
55.0833	1.18
55.125	0.99
55.1667	1.08
55.2083	1.1
55.25	1.17
55.2917	1.23
55.3333	1.36
55.375	1.57
55.4167	1.85
55.4583	2.58
55.5	3.13
55.5417	2.99
55.5833	2.79
55.625	2.64
55.6667	2.36
55.7083	1.88
55.75	1.07
55.7917	1.42
55.8333	1.27
55.875	1.34
55.9167	1.26
55.9583	1.26
56	0.92
56.0417	1.44
56.0833	1.5
56.125	1.72
56.1667	1.85
56.2083	1.98
56.25	2.14
56.2917	2.32
56.3333	2.37
56.375	2.59
56.4167	2.72
56.4583	2.72
56.5	2.76
56.5417	2.82
56.5833	2.78
56.625	2.7
56.6667	2.62
56.7083	2.68
56.75	2.73
56.7917	2.8
56.8333	2.71
56.875	2.71
56.9167	2.9
56.9583	3.06
57	3.28
57.0417	3.48
57.0833	3.66
57.125	3.81
57.1667	3.98
57.2083	4.23
57.25	4.4
57.2917	4.55
57.3333	4.79
57.375	5.02
57.4167	5.24
57.4583	5.46
57.5	5.62
57.5417	5.7
57.5833	5.84
57.625	5.99
57.6667	6.12
57.7083	6.29
57.75	6.43
57.7917	6.54
57.8333	6.64
57.875	6.75
57.9167	6.82
57.9583	6.89
58	6.97
58.0417	7.04
58.0833	7.1
58.125	7.1
58.1667	7.21
58.2083	7.32
58.25	7.35
58.2917	7.39
58.3333	7.51
58.375	7.83
58.4167	7.89
58.4583	7.93
58.5	7.81
58.5417	8.02
58.5833	8.3
58.625	8.08
58.6667	7.58
58.7083	6.97
58.75	6.17
58.7917	6.18
58.8333	5.51
58.875	5.07
58.9167	4.31
58.9583	4.45
59	4.93
59.0417	5.35
59.0833	6.14
59.125	6.48
59.1667	6.58
59.2083	5.76
59.25	5.07
59.2917	4.86
59.3333	4.93
59.375	6.14
59.4167	6.84
59.4583	7.25
59.5	7.2
59.5417	7.4
59.5833	7.02
59.625	6.87
59.6667	6.78
59.7083	6.74
59.75	6.77
59.7917	6.6
59.8333	6.54
59.875	6.55
59.9167	6.42
59.9583	6.32
60	5.97
60.0417	5.6
60.0833	5.41
60.125	5.1
60.1667	6.08
60.2083	6.38
60.25	6.79
60.2917	6.33
60.3333	6.08
60.375	6.4
60.4167	5.93
60.4583	7.38
60.5	9.03
60.5417	10.91
60.5833	10.76
60.625	8.49
60.6667	6.01
60.7083	5.01
60.75	4.03
60.7917	3.64
60.8333	3.9
60.875	3.83
60.9167	4.29
60.9583	5.17
61	5.73
61.0417	5.96
61.0833	5.92
61.125	5.63
61.1667	5.35
61.2083	6.16
61.25	5.93
61.2917	5.1
61.3333	5.56
61.375	6.52
61.4167	8.48
61.4583	9.93
61.5	11.38
61.5417	11.81
61.5833	10.62
61.625	10.14
61.6667	8.98
61.7083	9.12
61.75	9.01
61.7917	8.15
61.8333	7.66
61.875	8.36
61.9167	8.76
61.9583	8.59
62	8.72
62.0417	8.35
62.0833	7.91
62.125	7.5
62.1667	7.2
62.2083	6.95
62.25	6.68
62.2917	6.35
62.3333	6.13
62.375	6.26
62.4167	6.39
62.4583	6.89
62.5	7.91
62.5417	9.28
62.5833	8.74
62.625	6.55
62.6667	4.39
62.7083	3.45
62.75	2.71
62.7917	2.19
62.8333	1.64
62.875	1.52
62.9167	1.43
62.9583	1.35
63	1.13
63.0417	0.62
63.0833	0.58
63.125	0.7
63.1667	0.47
63.2083	0.6
63.25	0.57
63.2917	0.4
63.3333	0.68
63.375	1.03
63.4167	3.1
63.4583	5.4
63.5	7.37
63.5417	7.98
63.5833	7.17
63.625	4.97
63.6667	3.36
63.7083	2.54
63.75	2.1
63.7917	1.78
63.8333	1.36
63.875	1.08
63.9167	0.8
63.9583	0.85
64	0.71
64.0417	0.63
64.0833	0.66
64.125	0.68
64.1667	0.51
64.2083	0.24
64.25	0.04
64.2917	0.23
64.3333	0.21
64.375	0.29
64.4167	0.99
64.4583	4.35
64.5	6.67
64.5417	7.84
64.5833	7.24
64.625	4.29
64.6667	1.95
64.7083	0.83
64.75	0.43
64.7917	0.21
64.8333	0.07
64.875	-0.06
64.9167	-0.1
64.9583	0.1
65	0.4
65.0417	0.54
65.0833	0.6
65.125	0.61
65.1667	0.67
65.2083	0.76
65.25	1.01
65.2917	1.61
65.3333	2.19
65.375	2.93
65.4167	3.39
65.4583	3.56
65.5	3.59
65.5417	3.67
65.5833	3.44
65.625	3.34
65.6667	3.45
65.7083	3.51
65.75	3.71
65.7917	4
65.8333	4.23
65.875	4.47
65.9167	4.88
65.9583	5.25
66	5.41
66.0417	5.6
66.0833	5.68
66.125	5.71
66.1667	5.7
66.2083	5.62
66.25	5.45
66.2917	4.07
66.3333	3.21
66.375	3.4
66.4167	5.11
66.4583	6.51
66.5	6.7
66.5417	6.83
66.5833	6.16
66.625	5.84
66.6667	5.72
66.7083	5.94
66.75	6.18
66.7917	6.11
66.8333	5.93
66.875	6.08
66.9167	6.12
66.9583	6.21
67	5.8
67.0417	6.69
67.0833	6.95
67.125	6.88
67.1667	6.88
67.2083	7.08
67.25	7.45
67.2917	7.38
67.3333	7.5
67.375	7.83
67.4167	8.3
67.4583	8.49
67.5	8.64
67.5417	8.41
67.5833	8.01
67.625	7.59
67.6667	7.48
67.7083	7.15
67.75	6.58
67.7917	5.69
67.8333	6.13
67.875	6.11
67.9167	5.4
67.9583	4.17
68	3.42
68.0417	2.71
68.0833	2.94
68.125	3.17
68.1667	3.15
68.2083	3.59
68.25	3.79
68.2917	3.96
68.3333	4.06
68.375	4.34
68.4167	4.35
68.4583	3.59
68.5	1.79
68.5417	1.52
68.5833	1.51
68.625	1.44
68.6667	1.43
68.7083	1.39
68.75	1.38
68.7917	1.37
68.8333	1.37
68.875	1.39
68.9167	1.41
68.9583	1.43
69	1.47
69.0417	1.5
69.0833	1.48
69.125	1.33
69.1667	0.93
69.2083	0.72
69.25	0.59
69.2917	0.5
69.3333	0.43
69.375	0.42
69.4167	0.65
69.4583	1.08
69.5	1.65
69.5417	1.79
69.5833	1.66
69.625	1.47
69.6667	1.02
69.7083	0.62
69.75	0.45
69.7917	0.36
69.8333	0.29
69.875	0.23
69.9167	0.2
69.9583	0.13
70	0.09
70.0417	0.06
70.0833	0.05
70.125	0.03
70.1667	0.07
70.2083	0.09
70.25	0.24
70.2917	0.29
70.3333	0.31
70.375	0.36
70.4167	0.43
70.4583	0.37
70.5	0.41
70.5417	0.37
70.5833	0.35
70.625	0.33
70.6667	0.28
70.7083	0.17
70.75	0.28
70.7917	0.36
70.8333	0.39
70.875	0.41
70.9167	0.44
70.9583	0.45
71	0.47
71.0417	0.51
71.0833	0.53
71.125	0.55
71.1667	0.57
71.2083	0.6
71.25	0.62
71.2917	0.65
71.3333	0.71
71.375	0.77
71.4167	0.85
71.4583	0.91
71.5	0.96
71.5417	0.96
71.5833	0.94
71.625	0.91
71.6667	0.89
71.7083	0.88
71.75	0.88
71.7917	0.88
71.8333	0.75
71.875	0.65
71.9167	0.79
71.9583	0.86
72	0.89
72.0417	0.91
72.0833	0.93
72.125	0.94
72.1667	0.95
72.2083	0.96
72.25	0.97
72.2917	0.98
72.3333	1
72.375	1.03
72.4167	1.07
72.4583	1.1
72.5	1.22
72.5417	1.14
72.5833	1.06
72.625	1.02
72.6667	0.99
72.7083	0.98
72.75	0.98
72.7917	0.97
72.8333	0.96
72.875	0.94
72.9167	0.91
72.9583	0.91
73	0.96
73.0417	0.9
73.0833	1.02
73.125	1.08
73.1667	1.11
73.2083	1.18
73.25	1.22
73.2917	0.84
73.3333	0.65
73.375	0.89
73.4167	1.3
73.4583	1.55
73.5	3.19
73.5417	2.79
73.5833	2.6
73.625	2.09
73.6667	2.63
73.7083	2.33
73.75	2.57
73.7917	2.46
73.8333	2.26
73.875	2.02
73.9167	2.3
73.9583	3.2
74	3.28
74.0417	3.68
74.0833	3.38
74.125	3.23
74.1667	3.59
74.2083	3.93
74.25	4.17
74.2917	3.91
74.3333	4.11
74.375	4.51
74.4167	4.78
74.4583	5.39
74.5	5.3
74.5417	5.15
74.5833	5.09
74.625	4.92
74.6667	4.92
74.7083	4.92
74.75	4.95
74.7917	4.98
74.8333	4.92
74.875	4.79
74.9167	4.73
74.9583	4.77
75	4.79
75.0417	4.55
75.0833	4.36
75.125	4.43
75.1667	4.27
75.2083	4.28
75.25	4.06
75.2917	4.02
75.3333	3.88
75.375	4.11
75.4167	4.96
75.4583	5.16
75.5	5.63
75.5417	5.5
75.5833	4.65
75.625	2.87
75.6667	1.66
75.7083	1.05
75.75	0.75
75.7917	0.55
75.8333	0.42
75.875	0.35
75.9167	0.25
75.9583	0.16
76	0.09
76.0417	0.04
76.0833	-0.11
76.125	-0.19
76.1667	-0.22
76.2083	0.24
76.25	0.42
76.2917	0.46
76.3333	0.44
76.375	0.55
76.4167	0.96
76.4583	1.88
76.5	2.2
76.5417	2.28
76.5833	2
76.625	1.78
76.6667	1.43
76.7083	1.23
76.75	1.17
76.7917	1.09
76.8333	1.04
76.875	0.62
76.9167	0.66
76.9583	0.78
77	0.6
77.0417	0.4
77.0833	0.57
77.125	0.64
77.1667	0.69
77.2083	0.71
77.25	0.69
77.2917	0.62
77.3333	0.39
77.375	0.56
77.4167	0.76
77.4583	1.06
77.5	1.26
77.5417	1.18
77.5833	0.97
77.625	0.77
77.6667	0.67
77.7083	0.58
77.75	0.56
77.7917	0.48
77.8333	0.45
77.875	0.44
77.9167	0.44
77.9583	0.45
78	0.49
78.0417	0.56
78.0833	0.59
78.125	0.69
78.1667	0.7
78.2083	0.73
78.25	0.8
78.2917	0.82
78.3333	0.88
78.375	1.03
78.4167	1.3
78.4583	1.57
78.5	1.69
78.5417	1.83
78.5833	1.99
78.625	1.85
78.6667	1.84
78.7083	1.83
78.75	2.02
78.7917	2.26
78.8333	2.44
78.875	2.48
78.9167	2.44
78.9583	2.4
79	2.34
79.0417	2.27
79.0833	2.2
79.125	2.23
79.1667	2.31
79.2083	2.43
79.25	2.52
79.2917	2.52
79.3333	2.54
79.375	2.67
79.4167	2.83
79.4583	2.92
79.5	2.96
79.5417	3.04
79.5833	3.08
79.625	3.08
79.6667	3.08
79.7083	3.13
79.75	3.14
79.7917	3.18
79.8333	3
79.875	3.18
79.9167	3.33
79.9583	3.38
80	3.3
80.0417	3.35
80.0833	3.37
80.125	3.46
80.1667	3.55
80.2083	3.53
80.25	3.55
80.2917	3.61
80.3333	3.71
80.375	3.76
80.4167	3.95
80.4583	4.08
80.5	4.07
80.5417	3.83
80.5833	3.71
80.625	3.61
80.6667	3.46
80.7083	3.38
80.75	3.28
80.7917	3.41
80.8333	3.31
80.875	2.8
80.9167	1.99
80.9583	2.31
81	2.7
81.0417	2.76
81.0833	2.69
81.125	2.64
81.1667	2.59
81.2083	2.66
81.25	2.7
81.2917	2.62
81.3333	2.63
81.375	2.69
81.4167	2.85
81.4583	2.97
81.5	2.99
81.5417	2.93
81.5833	2.81
81.625	2.56
81.6667	2.35
81.7083	2.28
81.75	2.29
81.7917	2.27
81.8333	2.26
81.875	2.27
81.9167	2.23
81.9583	2.22
82	2.23
82.0417	2.24
82.0833	2.29
82.125	2.38
82.1667	2.49
82.2083	2.56
82.25	2.62
82.2917	2.66
82.3333	2.74
82.375	2.89
82.4167	3.04
82.4583	3.15
82.5	3.2
82.5417	3.13
82.5833	3.01
82.625	2.87
82.6667	2.81
82.7083	2.77
82.75	2.73
82.7917	2.68
82.8333	2.6
82.875	2.52
82.9167	2.53
82.9583	2.51
83	2.48
83.0417	2.45
83.0833	2.42
83.125	1.12
83.1667	0.15
83.2083	0.6
83.25	0.78
[truncated: 3,809 more rows]

## Sheet: North_Sweden_late_14
Days_from_sowing	Temperature_oC
0	13
0.0416667	12.69
0.0833333	12.41
0.125	12.12
0.166667	11.94
0.208333	11.81
0.25	11.86
0.291667	12.32
0.333333	13.07
0.375	14.56
0.416667	16.34
0.458333	19.88
0.5	23.22
0.541667	19.26
0.583333	17.8
0.625	17.9
0.666667	16.95
0.708333	16.33
0.75	15.78
0.791667	15.33
0.833333	14.79
0.875	14.65
0.916667	14.65
0.958333	14.68
1	14.67
1.04167	14.58
1.08333	14.39
1.125	14.28
1.16667	14.17
1.20833	13.97
1.25	13.86
1.29167	14.16
1.33333	14.92
1.375	15.73
1.41667	16.63
1.45833	16.92
1.5	18.59
1.54167	17.6
1.58333	17.46
1.625	16.44
1.66667	16.29
1.70833	15.56
1.75	14.65
1.79167	14
1.83333	13.5
1.875	13.1
1.91667	12.68
1.95833	12.32
2	12.04
2.04167	11.79
2.08333	11.56
2.125	11.32
2.16667	11.08
2.20833	10.83
2.25	10.78
2.29167	11.13
2.33333	11.81
2.375	13.18
2.41667	15.31
2.45833	18.04
2.5	22.37
2.54167	17.68
2.58333	16.1
2.625	16.55
2.66667	15.29
2.70833	14.58
2.75	13.98
2.79167	13.54
2.83333	13.48
2.875	13.12
2.91667	12.73
2.95833	12.46
3	12.27
3.04167	12.43
3.08333	12.46
3.125	12.59
3.16667	12.58
3.20833	12.32
3.25	12.78
3.29167	13.7
3.33333	14.04
3.375	15.29
3.41667	16.48
3.45833	18.78
3.5	21.92
3.54167	19.03
3.58333	18.25
3.625	17.79
3.66667	16.92
3.70833	16.04
3.75	15.16
3.79167	14.46
3.83333	13.91
3.875	13.39
3.91667	13
3.95833	12.67
4	12.36
4.04167	12.05
4.08333	11.76
4.125	11.45
4.16667	11.16
4.20833	10.89
4.25	10.76
4.29167	11.11
4.33333	11.72
4.375	12.89
4.41667	15.33
4.45833	16.84
4.5	20.54
4.54167	17.02
4.58333	15.71
4.625	16.47
4.66667	15.11
4.70833	14.29
4.75	13.73
4.79167	13.17
4.83333	12.73
4.875	12.42
4.91667	12.32
4.95833	12.14
5	11.99
5.04167	11.88
5.08333	11.73
5.125	11.54
5.16667	11.4
5.20833	11.51
5.25	11.78
5.29167	12.12
5.33333	12.6
5.375	13.25
5.41667	14.09
5.45833	15.39
5.5	18.94
5.54167	16.89
5.58333	15.56
5.625	16.19
5.66667	14.96
5.70833	14.09
5.75	13.54
5.79167	13.56
5.83333	13.62
5.875	13.2
5.91667	12.97
5.95833	13.19
6	13.32
6.04167	13.42
6.08333	13.45
6.125	13.33
6.16667	13.33
6.20833	13.3
6.25	13.43
6.29167	13.83
6.33333	14.39
6.375	15.32
6.41667	16.72
6.45833	18.57
6.5	22.42
6.54167	18.26
6.58333	16.97
6.625	17.48
6.66667	16.43
6.70833	15.5
6.75	14.81
6.79167	14.33
6.83333	13.99
6.875	13.82
6.91667	13.54
6.95833	13.13
7	12.79
7.04167	12.52
7.08333	12.16
7.125	11.77
7.16667	12.09
7.20833	12.19
7.25	12.23
7.29167	12.58
7.33333	13.47
7.375	14.41
7.41667	14.86
7.45833	15.26
7.5	15.99
7.54167	15.53
7.58333	15.11
7.625	15.83
7.66667	15
7.70833	14.19
7.75	13.63
7.79167	13.25
7.83333	12.98
7.875	12.64
7.91667	12.26
7.95833	11.98
8	11.66
8.04167	11.37
8.08333	11.12
8.125	11.02
8.16667	10.99
8.20833	11.01
8.25	11.33
8.29167	11.75
8.33333	12.58
8.375	13.61
8.41667	14.31
8.45833	16.56
8.5	19.85
8.54167	16.69
8.58333	15.72
8.625	16.13
8.66667	15.23
8.70833	14.47
8.75	13.7
8.79167	13.16
8.83333	12.78
8.875	12.48
8.91667	12.18
8.95833	11.82
9	11.58
9.04167	11.33
9.08333	11.14
9.125	10.99
9.16667	10.86
9.20833	10.76
9.25	10.68
9.29167	11.13
9.33333	11.5
9.375	12.09
9.41667	13.95
9.45833	17.24
9.5	20.14
9.54167	16.93
9.58333	16.02
9.625	16.07
9.66667	15.2
9.70833	14.27
9.75	13.58
9.79167	13.04
9.83333	12.57
9.875	12.2
9.91667	11.95
9.95833	11.83
10	11.83
10.0417	11.89
10.0833	12.03
10.125	12.11
10.1667	12.21
10.2083	12.24
10.25	12.2
10.2917	12.37
10.3333	12.64
10.375	13.02
10.4167	13.31
10.4583	13.64
10.5	14.45
10.5417	14.77
10.5833	14.68
10.625	14.27
10.6667	13.89
10.7083	13.19
10.75	12.5
10.7917	12.12
10.8333	12.01
10.875	11.54
10.9167	10.98
10.9583	10.54
11	10.18
11.0417	9.9
11.0833	9.64
11.125	9.09
11.1667	8.56
11.2083	8.14
11.25	7.86
11.2917	8.02
11.3333	8.49
11.375	9.48
11.4167	11.11
11.4583	13.66
11.5	15.3
11.5417	12.69
11.5833	11.87
11.625	11.29
11.6667	10.8
11.7083	10.23
11.75	9.63
11.7917	9.23
11.8333	8.61
11.875	8.02
11.9167	7.62
11.9583	7.28
12	6.92
12.0417	6.66
12.0833	6.38
12.125	6.12
12.1667	5.86
12.2083	5.59
12.25	5.5
12.2917	5.81
12.3333	6.36
12.375	7.51
12.4167	8.72
12.4583	12.4
12.5	15.33
12.5417	11.46
12.5833	10.29
12.625	10.95
12.6667	9.91
12.7083	8.47
12.75	7.55
12.7917	6.93
12.8333	6.52
12.875	6.14
12.9167	5.8
12.9583	5.55
13	5.27
13.0417	5.03
13.0833	4.81
13.125	4.61
13.1667	4.43
13.2083	4.27
13.25	4.22
13.2917	4.54
13.3333	5.08
13.375	6.37
13.4167	7.56
13.4583	11.33
13.5	14.49
13.5417	10.91
13.5833	9.78
13.625	9.01
13.6667	8.41
13.7083	7.93
13.75	7.52
13.7917	7.44
13.8333	7.36
13.875	7.29
13.9167	7.19
13.9583	5.41
14	5.39
14.0417	5.28
14.0833	5.12
14.125	5.12
14.1667	4.68
14.2083	4.44
14.25	4.63
14.2917	4.29
14.3333	4.18
14.375	5.97
14.4167	12.87
14.4583	18.5
14.5	21.11
14.5417	16.23
14.5833	14.79
14.625	13.25
14.6667	11.14
14.7083	9.32
14.75	6.76
14.7917	5.83
14.8333	6.03
14.875	6.07
14.9167	5.73
14.9583	5
15	5.08
15.0417	4.91
15.0833	4.91
15.125	5.38
15.1667	6.84
15.2083	7.21
15.25	7.43
15.2917	7.93
15.3333	8.73
15.375	9.65
15.4167	10.6
15.4583	11.32
15.5	10.11
15.5417	10.09
15.5833	10.32
15.625	10.1
15.6667	10.03
15.7083	9.32
15.75	8.46
15.7917	7.58
15.8333	6.33
15.875	5.5
15.9167	5.21
15.9583	4.85
16	4.87
16.0417	4.78
16.0833	4.95
16.125	4.92
16.1667	4.86
16.2083	4.24
16.25	4.36
16.2917	4.98
16.3333	5.35
16.375	7.32
16.4167	12.39
16.4583	10.87
16.5	12.81
16.5417	13.44
16.5833	16.42
16.625	14.18
16.6667	11.45
16.7083	8.57
16.75	7.06
16.7917	6.65
16.8333	6.08
16.875	5.53
16.9167	5.12
16.9583	4.83
17	4.93
17.0417	4.96
17.0833	5.27
17.125	6.37
17.1667	7.48
17.2083	8.11
17.25	8.53
17.2917	9.03
17.3333	9.41
17.375	9.78
17.4167	11.02
17.4583	11.98
17.5	12.02
17.5417	11.24
17.5833	11.28
17.625	15.32
17.6667	13.47
17.7083	10.72
17.75	10.34
17.7917	9.42
17.8333	8.1
17.875	6.51
17.9167	5.48
17.9583	4.89
18	5.11
18.0417	5.11
18.0833	5.16
18.125	5.58
18.1667	5.59
18.2083	5.03
18.25	4.92
18.2917	5.24
18.3333	5.6
18.375	7.88
18.4167	12.94
18.4583	14.51
18.5	15
18.5417	15.08
18.5833	14.6
18.625	13.31
18.6667	12.62
18.7083	9.16
18.75	7.4
18.7917	6.55
18.8333	5.85
18.875	5.33
18.9167	4.91
18.9583	4.56
19	4.01
19.0417	3.16
19.0833	2.83
19.125	2.37
19.1667	2.23
19.2083	1.78
19.25	1.58
19.2917	1.77
19.3333	2.37
19.375	4.66
19.4167	13.06
19.4583	16.84
19.5	19.31
19.5417	20.48
19.5833	19.3
19.625	17.52
19.6667	13.99
19.7083	8.61
19.75	5.98
19.7917	4.65
19.8333	3.58
19.875	2.81
19.9167	2.18
19.9583	1.73
20	1.29
20.0417	1.01
20.0833	0.72
20.125	0.61
20.1667	0.5
20.2083	0.48
20.25	0.85
20.2917	1.45
20.3333	3.94
20.375	6.69
20.4167	7.77
20.4583	12.58
20.5	16.45
20.5417	18.45
20.5833	18.04
20.625	17.17
20.6667	13.34
20.7083	8.86
20.75	7.28
20.7917	6.5
20.8333	6.64
20.875	6.42
20.9167	6.95
20.9583	6.99
21	7.2
21.0417	7.32
21.0833	7.41
21.125	7.76
21.1667	7.64
21.2083	7.49
21.25	6.99
21.2917	7.58
21.3333	8.21
21.375	10.24
21.4167	14.36
21.4583	15.76
21.5	16.44
21.5417	19.85
21.5833	20.45
21.625	18.92
21.6667	14.74
21.7083	9.63
21.75	7.22
21.7917	5.88
21.8333	4.91
21.875	4.1
21.9167	3.58
21.9583	3.01
22	2.58
22.0417	2.24
22.0833	1.91
22.125	1.71
22.1667	1.99
22.2083	1.89
22.25	1.76
22.2917	3.26
22.3333	5.94
22.375	7.22
22.4167	7.91
22.4583	9.05
22.5	9.79
22.5417	10.24
22.5833	10.05
22.625	10.09
22.6667	9.97
22.7083	9.62
22.75	9.45
22.7917	9.44
22.8333	9.41
22.875	9.27
22.9167	8.66
22.9583	7.27
23	7.03
23.0417	7.33
23.0833	6.52
23.125	6.78
23.1667	6.44
23.2083	6.08
23.25	5.96
23.2917	5.99
23.3333	7.15
23.375	9.37
23.4167	11.83
23.4583	15.29
23.5	18.04
23.5417	19.5
23.5833	19.96
23.625	18.5
23.6667	13.27
23.7083	11.35
23.75	10.69
23.7917	10.37
23.8333	10.24
23.875	10.12
23.9167	10.01
23.9583	10.09
24	10.09
24.0417	10.03
24.0833	9.92
24.125	9.98
24.1667	10.12
24.2083	10.22
24.25	10.34
24.2917	10.51
24.3333	10.63
24.375	10.74
24.4167	10.89
24.4583	10.95
24.5	11.31
24.5417	11.44
24.5833	11.12
24.625	11.08
24.6667	10.71
24.7083	10.4
24.75	9.96
24.7917	9.72
24.8333	9.59
24.875	9.5
24.9167	9.28
24.9583	9.28
25	8.97
25.0417	8.96
25.0833	8.82
25.125	8.14
25.1667	7.43
25.2083	7.26
25.25	5.91
25.2917	7.46
25.3333	8.39
25.375	9.28
25.4167	11.18
25.4583	12.01
25.5	11.85
25.5417	10.36
25.5833	9.74
25.625	9.13
25.6667	8.31
25.7083	7.77
25.75	7.49
25.7917	7.38
25.8333	7.3
25.875	7.13
25.9167	7.1
25.9583	7.02
26	6.95
26.0417	6.93
26.0833	6.84
26.125	6.53
26.1667	6.68
26.2083	6.13
26.25	6.4
26.2917	6.63
26.3333	7.07
26.375	7.21
26.4167	6.88
26.4583	6.82
26.5	6.87
26.5417	6.8
26.5833	6.83
26.625	6.57
26.6667	6.36
26.7083	6.11
26.75	6.34
26.7917	6.63
26.8333	6.83
26.875	7.03
26.9167	7.26
26.9583	7.35
27	7.4
27.0417	7.51
27.0833	7.52
27.125	7.46
27.1667	7.4
27.2083	7.36
27.25	7.29
27.2917	7.23
27.3333	7.23
27.375	7.17
27.4167	7.12
27.4583	7.07
27.5	7.03
27.5417	7.22
27.5833	7.24
27.625	7.61
27.6667	7.68
27.7083	7.14
27.75	6.88
27.7917	6.8
27.8333	6.74
27.875	6.59
27.9167	6.46
27.9583	6.6
28	6.56
28.0417	6.56
28.0833	6.64
28.125	6.63
28.1667	6.55
28.2083	6.36
28.25	6.23
28.2917	6.54
28.3333	7.83
28.375	8.17
28.4167	8.11
28.4583	7.97
28.5	7.57
28.5417	7.29
28.5833	7.03
28.625	6.79
28.6667	6.57
28.7083	6.39
28.75	6.27
28.7917	6.26
28.8333	6.36
28.875	6.38
28.9167	6.47
28.9583	6.67
29	6.92
29.0417	7.14
29.0833	7.26
29.125	7.28
29.1667	7.3
29.2083	6.98
29.25	6.61
29.2917	7.16
29.3333	8.16
29.375	8.73
29.4167	8.78
29.4583	8.88
29.5	9.48
29.5417	9.49
29.5833	9.05
29.625	8.86
29.6667	8.17
29.7083	7.75
29.75	7.46
29.7917	7.23
29.8333	6.95
29.875	6.76
29.9167	6.59
29.9583	6.43
30	6.25
30.0417	6.09
30.0833	5.97
30.125	5.75
30.1667	5.83
30.2083	5.61
30.25	5.71
30.2917	5.87
30.3333	6.27
30.375	6.69
30.4167	7.01
30.4583	7.26
30.5	7.45
30.5417	7.69
30.5833	7.75
30.625	7.5
30.6667	7.17
30.7083	6.65
30.75	6.47
30.7917	6.43
30.8333	6.43
30.875	6.46
30.9167	6.47
30.9583	6.46
31	6.48
31.0417	6.51
31.0833	6.54
31.125	6.58
31.1667	6.62
31.2083	6.59
31.25	6.58
31.2917	6.5
31.3333	6.67
31.375	6.87
31.4167	7.18
31.4583	7.33
31.5	7.2
31.5417	7.06
31.5833	7.04
31.625	7.08
31.6667	6.74
31.7083	6.53
31.75	6.12
31.7917	5.83
31.8333	5.71
31.875	5.67
31.9167	5.6
31.9583	5.54
32	5.49
32.0417	5.4
32.0833	5.31
32.125	5.3
32.1667	5.3
32.2083	5.26
32.25	5.19
32.2917	5.34
32.3333	5.82
32.375	6.82
32.4167	8.57
32.4583	8.72
32.5	8.93
32.5417	8.69
32.5833	8.18
32.625	7.68
32.6667	7.04
32.7083	6.44
32.75	5.97
32.7917	5.68
32.8333	5.76
32.875	5.45
32.9167	5.09
32.9583	4.72
33	4.33
33.0417	4.59
33.0833	4.66
33.125	4.67
33.1667	4.93
33.2083	5.17
33.25	5.31
33.2917	5.51
33.3333	5.85
33.375	6.64
33.4167	8.42
33.4583	8.33
33.5	8.48
33.5417	8.11
33.5833	8.14
33.625	7.55
33.6667	6.66
33.7083	6.1
33.75	5.87
33.7917	5.61
33.8333	4.69
33.875	4.17
33.9167	3.46
33.9583	3.81
34	3.95
34.0417	4.1
34.0833	4.03
34.125	3.76
34.1667	3.77
34.2083	3.63
34.25	2.82
34.2917	3.06
34.3333	2.35
34.375	3.08
34.4167	6.25
34.4583	8.78
34.5	7.99
34.5417	6.05
34.5833	5.52
34.625	7.29
34.6667	4.82
34.7083	3.29
34.75	3.23
34.7917	3.19
34.8333	3.26
34.875	3.14
34.9167	2.82
34.9583	2.15
35	2.54
35.0417	2.66
35.0833	2.51
35.125	2.12
35.1667	2.18
35.2083	1.96
35.25	2.18
35.2917	2.31
35.3333	2.53
35.375	2.72
35.4167	4.05
35.4583	5.28
35.5	5.24
35.5417	5.87
35.5833	5.27
35.625	4.42
35.6667	3.63
35.7083	3.07
35.75	2.81
35.7917	2.59
35.8333	2.44
35.875	2.33
35.9167	2.21
35.9583	2.09
36	1.72
36.0417	1.49
36.0833	1.27
36.125	0.39
36.1667	0.09
36.2083	-0.07
36.25	-0.3
36.2917	-0.46
36.3333	-0.49
36.375	-0.17
36.4167	1.01
36.4583	4.53
36.5	7.97
36.5417	9.22
36.5833	9.27
36.625	7.38
36.6667	3.19
36.7083	0.96
36.75	0.49
36.7917	0.15
36.8333	-0.17
36.875	-0.52
36.9167	-0.86
36.9583	-1.08
37	-1.25
37.0417	-0.21
37.0833	0.06
37.125	0.29
37.1667	0.51
37.2083	0.57
37.25	0.81
37.2917	0.83
37.3333	0.66
37.375	1.42
37.4167	3.39
37.4583	4.79
37.5	6.24
37.5417	5.77
37.5833	6
37.625	5.14
37.6667	3.94
37.7083	4
37.75	4.5
37.7917	4.04
37.8333	4.74
37.875	4.98
37.9167	5.2
37.9583	5.4
38	5.74
38.0417	6.19
38.0833	6.62
38.125	6.63
38.1667	6.7
38.2083	6.69
38.25	6.65
38.2917	6.7
38.3333	7.14
38.375	7.98
38.4167	9.14
38.4583	9.32
38.5	10.09
38.5417	10.31
38.5833	9.09
38.625	8.24
38.6667	7.27
38.7083	6.46
38.75	5.65
38.7917	5.23
38.8333	4.63
38.875	4.31
38.9167	4.21
38.9583	4
39	3.93
39.0417	3.87
39.0833	3.74
39.125	3.69
39.1667	3.6
39.2083	3.55
39.25	3.51
39.2917	3.59
39.3333	3.99
39.375	4.83
39.4167	5.41
39.4583	5.78
39.5	6.17
39.5417	5.85
39.5833	6.07
39.625	5.49
39.6667	4.76
39.7083	4.41
39.75	4.2
39.7917	4.03
39.8333	3.66
39.875	3.83
39.9167	3.8
39.9583	3.64
40	3.62
40.0417	3.58
40.0833	3.51
40.125	3.43
40.1667	3.41
40.2083	3.32
40.25	3.22
40.2917	3.27
40.3333	3.44
40.375	3.6
40.4167	4.15
40.4583	4.88
40.5	4.64
40.5417	4.49
40.5833	4.13
40.625	3.29
40.6667	2.76
40.7083	2.42
40.75	2.23
40.7917	2.14
40.8333	1.98
40.875	1.9
40.9167	1.75
40.9583	1.63
41	1.39
41.0417	1.42
41.0833	1.18
41.125	0.99
41.1667	1.08
41.2083	1.1
41.25	1.17
41.2917	1.23
41.3333	1.36
41.375	1.57
41.4167	1.85
41.4583	2.58
41.5	3.13
41.5417	2.99
41.5833	2.79
41.625	2.64
41.6667	2.36
41.7083	1.88
41.75	1.07
41.7917	1.42
41.8333	1.27
41.875	1.34
41.9167	1.26
41.9583	1.26
42	0.92
42.0417	1.44
42.0833	1.5
42.125	1.72
42.1667	1.85
42.2083	1.98
42.25	2.14
42.2917	2.32
42.3333	2.37
42.375	2.59
42.4167	2.72
42.4583	2.72
42.5	2.76
42.5417	2.82
42.5833	2.78
42.625	2.7
42.6667	2.62
42.7083	2.68
42.75	2.73
42.7917	2.8
42.8333	2.71
42.875	2.71
42.9167	2.9
42.9583	3.06
43	3.28
43.0417	3.48
43.0833	3.66
43.125	3.81
43.1667	3.98
43.2083	4.23
43.25	4.4
43.2917	4.55
43.3333	4.79
43.375	5.02
43.4167	5.24
43.4583	5.46
43.5	5.62
43.5417	5.7
43.5833	5.84
43.625	5.99
43.6667	6.12
43.7083	6.29
43.75	6.43
43.7917	6.54
43.8333	6.64
43.875	6.75
43.9167	6.82
43.9583	6.89
44	6.97
44.0417	7.04
44.0833	7.1
44.125	7.1
44.1667	7.21
44.2083	7.32
44.25	7.35
44.2917	7.39
44.3333	7.51
44.375	7.83
44.4167	7.89
44.4583	7.93
44.5	7.81
44.5417	8.02
44.5833	8.3
44.625	8.08
44.6667	7.58
44.7083	6.97
44.75	6.17
44.7917	6.18
44.8333	5.51
44.875	5.07
44.9167	4.31
44.9583	4.45
45	4.93
45.0417	5.35
45.0833	6.14
45.125	6.48
45.1667	6.58
45.2083	5.76
45.25	5.07
45.2917	4.86
45.3333	4.93
45.375	6.14
45.4167	6.84
45.4583	7.25
45.5	7.2
45.5417	7.4
45.5833	7.02
45.625	6.87
45.6667	6.78
45.7083	6.74
45.75	6.77
45.7917	6.6
45.8333	6.54
45.875	6.55
45.9167	6.42
45.9583	6.32
46	5.97
46.0417	5.6
46.0833	5.41
46.125	5.1
46.1667	6.08
46.2083	6.38
46.25	6.79
46.2917	6.33
46.3333	6.08
46.375	6.4
46.4167	5.93
46.4583	7.38
46.5	9.03
46.5417	10.91
46.5833	10.76
46.625	8.49
46.6667	6.01
46.7083	5.01
46.75	4.03
46.7917	3.64
46.8333	3.9
46.875	3.83
46.9167	4.29
46.9583	5.17
47	5.73
47.0417	5.96
47.0833	5.92
47.125	5.63
47.1667	5.35
47.2083	6.16
47.25	5.93
47.2917	5.1
47.3333	5.56
47.375	6.52
47.4167	8.48
47.4583	9.93
47.5	11.38
47.5417	11.81
47.5833	10.62
47.625	10.14
47.6667	8.98
47.7083	9.12
47.75	9.01
47.7917	8.15
47.8333	7.66
47.875	8.36
47.9167	8.76
47.9583	8.59
48	8.72
48.0417	8.35
48.0833	7.91
48.125	7.5
48.1667	7.2
48.2083	6.95
48.25	6.68
48.2917	6.35
48.3333	6.13
48.375	6.26
48.4167	6.39
48.4583	6.89
48.5	7.91
48.5417	9.28
48.5833	8.74
48.625	6.55
48.6667	4.39
48.7083	3.45
48.75	2.71
48.7917	2.19
48.8333	1.64
48.875	1.52
48.9167	1.43
48.9583	1.35
49	1.13
49.0417	0.62
49.0833	0.58
49.125	0.7
49.1667	0.47
49.2083	0.6
49.25	0.57
49.2917	0.4
49.3333	0.68
49.375	1.03
49.4167	3.1
49.4583	5.4
49.5	7.37
49.5417	7.98
49.5833	7.17
49.625	4.97
49.6667	3.36
49.7083	2.54
49.75	2.1
49.7917	1.78
49.8333	1.36
49.875	1.08
49.9167	0.8
49.9583	0.85
50	0.71
50.0417	0.63
50.0833	0.66
50.125	0.68
50.1667	0.51
50.2083	0.24
50.25	0.04
50.2917	0.23
50.3333	0.21
50.375	0.29
50.4167	0.99
50.4583	4.35
50.5	6.67
50.5417	7.84
50.5833	7.24
50.625	4.29
50.6667	1.95
50.7083	0.83
50.75	0.43
50.7917	0.21
50.8333	0.07
50.875	-0.06
50.9167	-0.1
50.9583	0.1
51	0.4
51.0417	0.54
51.0833	0.6
51.125	0.61
51.1667	0.67
51.2083	0.76
51.25	1.01
51.2917	1.61
51.3333	2.19
51.375	2.93
51.4167	3.39
51.4583	3.56
51.5	3.59
51.5417	3.67
51.5833	3.44
51.625	3.34
51.6667	3.45
51.7083	3.51
51.75	3.71
51.7917	4
51.8333	4.23
51.875	4.47
51.9167	4.88
51.9583	5.25
52	5.41
52.0417	5.6
52.0833	5.68
52.125	5.71
52.1667	5.7
52.2083	5.62
52.25	5.45
52.2917	4.07
52.3333	3.21
52.375	3.4
52.4167	5.11
52.4583	6.51
52.5	6.7
52.5417	6.83
52.5833	6.16
52.625	5.84
52.6667	5.72
52.7083	5.94
52.75	6.18
52.7917	6.11
52.8333	5.93
52.875	6.08
52.9167	6.12
52.9583	6.21
53	5.8
53.0417	6.69
53.0833	6.95
53.125	6.88
53.1667	6.88
53.2083	7.08
53.25	7.45
53.2917	7.38
53.3333	7.5
53.375	7.83
53.4167	8.3
53.4583	8.49
53.5	8.64
53.5417	8.41
53.5833	8.01
53.625	7.59
53.6667	7.48
53.7083	7.15
53.75	6.58
53.7917	5.69
53.8333	6.13
53.875	6.11
53.9167	5.4
53.9583	4.17
54	3.42
54.0417	2.71
54.0833	2.94
54.125	3.17
54.1667	3.15
54.2083	3.59
54.25	3.79
54.2917	3.96
54.3333	4.06
54.375	4.34
54.4167	4.35
54.4583	3.59
54.5	1.79
54.5417	1.52
54.5833	1.51
54.625	1.44
54.6667	1.43
54.7083	1.39
54.75	1.38
54.7917	1.37
54.8333	1.37
54.875	1.39
54.9167	1.41
54.9583	1.43
55	1.47
55.0417	1.5
55.0833	1.48
55.125	1.33
55.1667	0.93
55.2083	0.72
55.25	0.59
55.2917	0.5
55.3333	0.43
55.375	0.42
55.4167	0.65
55.4583	1.08
55.5	1.65
55.5417	1.79
55.5833	1.66
55.625	1.47
55.6667	1.02
55.7083	0.62
55.75	0.45
55.7917	0.36
55.8333	0.29
55.875	0.23
55.9167	0.2
55.9583	0.13
56	0.09
56.0417	0.06
56.0833	0.05
56.125	0.03
56.1667	0.07
56.2083	0.09
56.25	0.24
56.2917	0.29
56.3333	0.31
56.375	0.36
56.4167	0.43
56.4583	0.37
56.5	0.41
56.5417	0.37
56.5833	0.35
56.625	0.33
56.6667	0.28
56.7083	0.17
56.75	0.28
56.7917	0.36
56.8333	0.39
56.875	0.41
56.9167	0.44
56.9583	0.45
57	0.47
57.0417	0.51
57.0833	0.53
57.125	0.55
57.1667	0.57
57.2083	0.6
57.25	0.62
57.2917	0.65
57.3333	0.71
57.375	0.77
57.4167	0.85
57.4583	0.91
57.5	0.96
57.5417	0.96
57.5833	0.94
57.625	0.91
57.6667	0.89
57.7083	0.88
57.75	0.88
57.7917	0.88
57.8333	0.75
57.875	0.65
57.9167	0.79
57.9583	0.86
58	0.89
58.0417	0.91
58.0833	0.93
58.125	0.94
58.1667	0.95
58.2083	0.96
58.25	0.97
58.2917	0.98
58.3333	1
58.375	1.03
58.4167	1.07
58.4583	1.1
58.5	1.22
58.5417	1.14
58.5833	1.06
58.625	1.02
58.6667	0.99
58.7083	0.98
58.75	0.98
58.7917	0.97
58.8333	0.96
58.875	0.94
58.9167	0.91
58.9583	0.91
59	0.96
59.0417	0.9
59.0833	1.02
59.125	1.08
59.1667	1.11
59.2083	1.18
59.25	1.22
59.2917	0.84
59.3333	0.65
59.375	0.89
59.4167	1.3
59.4583	1.55
59.5	3.19
59.5417	2.79
59.5833	2.6
59.625	2.09
59.6667	2.63
59.7083	2.33
59.75	2.57
59.7917	2.46
59.8333	2.26
59.875	2.02
59.9167	2.3
59.9583	3.2
60	3.28
60.0417	3.68
60.0833	3.38
60.125	3.23
60.1667	3.59
60.2083	3.93
60.25	4.17
60.2917	3.91
60.3333	4.11
60.375	4.51
60.4167	4.78
60.4583	5.39
60.5	5.3
60.5417	5.15
60.5833	5.09
60.625	4.92
60.6667	4.92
60.7083	4.92
60.75	4.95
60.7917	4.98
60.8333	4.92
60.875	4.79
60.9167	4.73
60.9583	4.77
61	4.79
61.0417	4.55
61.0833	4.36
61.125	4.43
61.1667	4.27
61.2083	4.28
61.25	4.06
61.2917	4.02
61.3333	3.88
61.375	4.11
61.4167	4.96
61.4583	5.16
61.5	5.63
61.5417	5.5
61.5833	4.65
61.625	2.87
61.6667	1.66
61.7083	1.05
61.75	0.75
61.7917	0.55
61.8333	0.42
61.875	0.35
61.9167	0.25
61.9583	0.16
62	0.09
62.0417	0.04
62.0833	-0.11
62.125	-0.19
62.1667	-0.22
62.2083	0.24
62.25	0.42
62.2917	0.46
62.3333	0.44
62.375	0.55
62.4167	0.96
62.4583	1.88
62.5	2.2
62.5417	2.28
62.5833	2
62.625	1.78
62.6667	1.43
62.7083	1.23
62.75	1.17
62.7917	1.09
62.8333	1.04
62.875	0.62
62.9167	0.66
62.9583	0.78
63	0.6
63.0417	0.4
63.0833	0.57
63.125	0.64
63.1667	0.69
63.2083	0.71
63.25	0.69
63.2917	0.62
63.3333	0.39
63.375	0.56
63.4167	0.76
63.4583	1.06
63.5	1.26
63.5417	1.18
63.5833	0.97
63.625	0.77
63.6667	0.67
63.7083	0.58
63.75	0.56
63.7917	0.48
63.8333	0.45
63.875	0.44
63.9167	0.44
63.9583	0.45
64	0.49
64.0417	0.56
64.0833	0.59
64.125	0.69
64.1667	0.7
64.2083	0.73
64.25	0.8
64.2917	0.82
64.3333	0.88
64.375	1.03
64.4167	1.3
64.4583	1.57
64.5	1.69
64.5417	1.83
64.5833	1.99
64.625	1.85
64.6667	1.84
64.7083	1.83
64.75	2.02
64.7917	2.26
64.8333	2.44
64.875	2.48
64.9167	2.44
64.9583	2.4
65	2.34
65.0417	2.27
65.0833	2.2
65.125	2.23
65.1667	2.31
65.2083	2.43
65.25	2.52
65.2917	2.52
65.3333	2.54
65.375	2.67
65.4167	2.83
65.4583	2.92
65.5	2.96
65.5417	3.04
65.5833	3.08
65.625	3.08
65.6667	3.08
65.7083	3.13
65.75	3.14
65.7917	3.18
65.8333	3
65.875	3.18
65.9167	3.33
65.9583	3.38
66	3.3
66.0417	3.35
66.0833	3.37
66.125	3.46
66.1667	3.55
66.2083	3.53
66.25	3.55
66.2917	3.61
66.3333	3.71
66.375	3.76
66.4167	3.95
66.4583	4.08
66.5	4.07
66.5417	3.83
66.5833	3.71
66.625	3.61
66.6667	3.46
66.7083	3.38
66.75	3.28
66.7917	3.41
66.8333	3.31
66.875	2.8
66.9167	1.99
66.9583	2.31
67	2.7
67.0417	2.76
67.0833	2.69
67.125	2.64
67.1667	2.59
67.2083	2.66
67.25	2.7
67.2917	2.62
67.3333	2.63
67.375	2.69
67.4167	2.85
67.4583	2.97
67.5	2.99
67.5417	2.93
67.5833	2.81
67.625	2.56
67.6667	2.35
67.7083	2.28
67.75	2.29
67.7917	2.27
67.8333	2.26
67.875	2.27
67.9167	2.23
67.9583	2.22
68	2.23
68.0417	2.24
68.0833	2.29
68.125	2.38
68.1667	2.49
68.2083	2.56
68.25	2.62
68.2917	2.66
68.3333	2.74
68.375	2.89
68.4167	3.04
68.4583	3.15
68.5	3.2
68.5417	3.13
68.5833	3.01
68.625	2.87
68.6667	2.81
68.7083	2.77
68.75	2.73
68.7917	2.68
68.8333	2.6
68.875	2.52
68.9167	2.53
68.9583	2.51
69	2.48
69.0417	2.45
69.0833	2.42
69.125	1.12
69.1667	0.15
69.2083	0.6
69.25	0.78
69.2917	0.96
69.3333	1.33
69.375	1.62
69.4167	2.04
69.4583	2.36
69.5	2.5
69.5417	2.55
69.5833	2.47
69.625	2.19
69.6667	2.14
69.7083	2.15
69.75	2.2
69.7917	2.31
69.8333	2.42
69.875	2.29
69.9167	2.12
69.9583	1.97
70	1.8
70.0417	1.85
70.0833	1.82
70.125	1.82
70.1667	1.81
70.2083	1.79
70.25	1.76
70.2917	1.71
70.3333	1.68
70.375	1.7
70.4167	1.84
70.4583	2.19
70.5	2.28
70.5417	2.24
70.5833	2.03
70.625	1.81
70.6667	1.69
70.7083	1.62
70.75	1.65
70.7917	1.64
70.8333	1.64
70.875	1.71
70.9167	1.72
70.9583	1.66
71	1.64
71.0417	1.58
71.0833	1.52
71.125	1.43
71.1667	1.31
71.2083	1.13
71.25	0.96
71.2917	0.88
71.3333	0.68
71.375	0.33
71.4167	-0.09
71.4583	0.01
71.5	0.32
71.5417	0.49
71.5833	0.46
71.625	0.31
71.6667	0.24
71.7083	0.22
71.75	0.23
71.7917	0.24
71.8333	0.23
71.875	0.26
71.9167	0.26
71.9583	0.26
72	0.25
72.0417	0.22
72.0833	0.17
72.125	0.08
72.1667	-0.04
72.2083	-0.41
72.25	-0.6
72.2917	-0.79
72.3333	-0.95
72.375	-1.04
72.4167	-0.76
72.4583	0.05
72.5	0.05
72.5417	0.22
72.5833	0.17
72.625	0.07
72.6667	0.09
72.7083	0.1
72.75	0.12
72.7917	0.14
72.8333	0.15
72.875	0.17
72.9167	0.17
72.9583	0.19
73	0.18
73.0417	0.21
73.0833	0.22
73.125	0.23
73.1667	0.24
73.2083	0.25
73.25	0.27
73.2917	0.28
73.3333	0.3
73.375	0.32
73.4167	0.36
73.4583	0.41
73.5	0.44
73.5417	0.52
73.5833	0.51
73.625	0.52
73.6667	0.56
73.7083	0.59
73.75	0.63
73.7917	0.69
73.8333	0.97
73.875	1.85
73.9167	2.39
73.9583	2.72
74	3.06
74.0417	3.2
74.0833	3.45
74.125	3.54
74.1667	3.61
74.2083	3.58
74.25	3.46
74.2917	3.44
74.3333	3.63
74.375	3.82
74.4167	4.07
74.4583	4.24
74.5	4.35
74.5417	4.44
74.5833	4.45
74.625	4.42
74.6667	4.38
74.7083	4.4
74.75	4.44
74.7917	4.52
74.8333	4.52
74.875	4.44
74.9167	4.51
74.9583	4.58
75	4.59
75.0417	4.57
75.0833	4.52
75.125	4.35
75.1667	4.18
75.2083	4.07
75.25	3.39
75.2917	2.78
75.3333	1.47
75.375	1.48
75.4167	2.47
75.4583	3.1
75.5	3.11
75.5417	2.79
75.5833	1.73
75.625	0.78
75.6667	0.97
75.7083	0.5
75.75	0.31
75.7917	0.11
75.8333	0.06
75.875	0.3
75.9167	0.32
75.9583	0.25
76	0.27
76.0417	0.19
76.0833	0.41
76.125	0.4
76.1667	0.36
76.2083	0.26
76.25	-0.12
76.2917	-0.19
76.3333	-0.18
76.375	-0.11
76.4167	0.04
76.4583	0.47
76.5	0.69
76.5417	0.9
76.5833	0.34
76.625	0.24
76.6667	0.26
76.7083	0.09
76.75	-0.1
76.7917	-0.18
76.8333	-0.26
76.875	-0.31
76.9167	-0.4
76.9583	-0.46
77	-0.5
77.0417	-0.51
77.0833	-0.58
77.125	-0.61
77.1667	-0.39
77.2083	-0.31
77.25	-0.59
77.2917	-0.43
77.3333	-0.14
77.375	-0.05
77.4167	0.06
77.4583	0.16
77.5	0.22
77.5417	0.24
77.5833	0.16
77.625	0.1
77.6667	-0.07
77.7083	-0.17
77.75	-0.36
77.7917	-0.51
77.8333	-0.62
77.875	-0.74
77.9167	-0.73
77.9583	-0.83
78	-0.9
78.0417	-0.94
78.0833	-1.02
78.125	-1.15
78.1667	-1.14
78.2083	-1.3
78.25	-1.24
78.2917	-1.11
78.3333	-0.98
78.375	-0.68
78.4167	-0.36
78.4583	-0.14
78.5	-0.1
78.5417	-0.02
78.5833	-0.34
78.625	-0.71
78.6667	-1.06
78.7083	-1.02
78.75	-0.91
78.7917	-1.05
78.8333	-1.03
78.875	-1.13
78.9167	-1.11
78.9583	-1.14
79	-1.12
79.0417	-1.21
79.0833	-1.14
79.125	-0.87
79.1667	-0.94
79.2083	-1.17
79.25	-1.28
79.2917	-1.38
79.3333	-1.43
79.375	-1.39
79.4167	-1.23
79.4583	-0.56
79.5	-0.57
79.5417	-0.81
79.5833	-1.37
79.625	-1.76
79.6667	-1.96
79.7083	-1.92
79.75	-1.26
79.7917	-0.89
79.8333	-0.71
79.875	-0.63
79.9167	-0.56
79.9583	-0.53
80	-0.48
80.0417	-0.44
80.0833	-0.42
80.125	-0.38
80.1667	-0.36
80.2083	-0.33
80.25	-0.33
80.2917	-0.3
80.3333	-0.27
80.375	-0.52
80.4167	-0.3
80.4583	-0.13
80.5	-0.21
80.5417	-0.24
80.5833	-0.39
80.625	-0.65
80.6667	-0.84
80.7083	-1.17
80.75	-1.29
80.7917	-1.11
80.8333	-1.16
80.875	-1.24
80.9167	-1.32
80.9583	-1.72
81	-1.17
81.0417	-0.79
81.0833	-1.39
81.125	-1.85
81.1667	-1.98
81.2083	-2.2
81.25	-2.4
81.2917	-2.48
81.3333	-2.65
81.375	-2.63
81.4167	-2.01
81.4583	-0.89
81.5	-0.74
81.5417	-0.93
81.5833	-1.1
81.625	-0.58
81.6667	-0.4
81.7083	-0.27
81.75	-0.24
81.7917	-0.25
81.8333	-0.26
81.875	-0.28
81.9167	-0.33
81.9583	-0.44
82	-0.52
82.0417	-0.63
82.0833	-0.74
82.125	-0.97
82.1667	-0.85
82.2083	-0.72
82.25	-0.92
82.2917	-0.88
82.3333	-0.64
82.375	-0.59
82.4167	-0.45
82.4583	-0.31
82.5	-0.42
82.5417	-0.61
82.5833	-0.92
82.625	-1.07
82.6667	-1.18
82.7083	-0.87
82.75	-0.6
82.7917	-0.45
82.8333	-0.26
82.875	-0.23
82.9167	-0.5
82.9583	-0.65
83	-0.76
83.0417	-0.98
83.0833	-1.26
83.125	-1.06
83.1667	-1.13
83.2083	-1.14
83.25	-1.03
[truncated: 3,785 more rows]

## Sheet: South_Sweden_14
Days_from_sowing	Temperature_oC
0	18.76
0.0416667	18.89
0.0833333	19.02
0.125	19.11
0.166667	19.19
0.208333	19.27
0.25	19.48
0.291667	19.56
0.333333	19.45
0.375	20.2
0.416667	20.97
0.458333	22.29
0.5	23.48
0.541667	23.54
0.583333	22.42
0.625	18.57
0.666667	17.49
0.708333	15.55
0.75	14.12
0.791667	13.5
0.833333	13.05
0.875	12.74
0.916667	12.56
0.958333	12.6
1	12.66
1.04167	12.67
1.08333	12.42
1.125	11.75
1.16667	10.92
1.20833	10.71
1.25	11.27
1.29167	11.5
1.33333	12.26
1.375	13.03
1.41667	13.59
1.45833	20.17
1.5	24.26
1.54167	26.09
1.58333	25.64
1.625	24.33
1.66667	17.8
1.70833	15.26
1.75	12.69
1.79167	11.5
1.83333	10.73
1.875	10.27
1.91667	10.14
1.95833	11.28
2	11.7
2.04167	10.79
2.08333	11.5
2.125	11.93
2.16667	12.28
2.20833	12.53
2.25	12.71
2.29167	13.04
2.33333	14.27
2.375	17.38
2.41667	18.97
2.45833	20.39
2.5	18.3
2.54167	17.94
2.58333	17.86
2.625	17.74
2.66667	16.9
2.70833	16.76
2.75	15.4
2.79167	14.69
2.83333	13.18
2.875	11.86
2.91667	11.05
2.95833	10.32
3	9.75
3.04167	9.51
3.08333	9.3
3.125	9.17
3.16667	9.07
3.20833	8.98
3.25	8.86
3.29167	9.22
3.33333	11.93
3.375	16.18
3.41667	21.58
3.45833	28.03
3.5	28.19
3.54167	33.15
3.58333	32.14
3.625	28.35
3.66667	18.63
3.70833	15.67
3.75	13.92
3.79167	12.65
3.83333	11.94
3.875	11.48
3.91667	10.89
3.95833	10.57
4	10.4
4.04167	10.36
4.08333	10.38
4.125	10.5
4.16667	10.22
4.20833	10.47
4.25	10.37
4.29167	11.17
4.33333	12.09
4.375	13.01
4.41667	17.34
4.45833	18.82
4.5	19.73
4.54167	20.98
4.58333	23.43
4.625	20.86
4.66667	18.64
4.70833	16.73
4.75	15.38
4.79167	14.32
4.83333	13.33
4.875	13.49
4.91667	12.97
4.95833	12.77
5	12.7
5.04167	12.61
5.08333	12.33
5.125	11.74
5.16667	10.9
5.20833	10.66
5.25	10.54
5.29167	10.75
5.33333	13.39
5.375	17.14
5.41667	21.5
5.45833	26.2
5.5	29.51
5.54167	30.2
5.58333	26.79
5.625	31.74
5.66667	22.77
5.70833	18.82
5.75	16.13
5.79167	14.38
5.83333	13.84
5.875	13.56
5.91667	13.21
5.95833	12.87
6	12.71
6.04167	12.77
6.08333	12.82
6.125	12.74
6.16667	12.38
6.20833	12.09
6.25	11.87
6.29167	11.75
6.33333	12.43
6.375	13.33
6.41667	13.9
6.45833	14.89
6.5	16.13
6.54167	17.54
6.58333	17.35
6.625	15.94
6.66667	15.34
6.70833	14.4
6.75	13.52
6.79167	13.03
6.83333	12.89
6.875	12.74
6.91667	12.43
6.95833	12.12
7	11.83
7.04167	11.68
7.08333	11.74
7.125	11.6
7.16667	11.48
7.20833	11.34
7.25	11.44
7.29167	11.64
7.33333	11.75
7.375	13.12
7.41667	12.97
7.45833	12.56
7.5	13.29
7.54167	15.28
7.58333	16.17
7.625	15.07
7.66667	14.51
7.70833	13.63
7.75	13.18
7.79167	13.02
7.83333	13.01
7.875	13.08
7.91667	13.16
7.95833	13.22
8	13.21
8.04167	13.13
8.08333	13.16
8.125	13.2
8.16667	13.17
8.20833	13.14
8.25	13.08
8.29167	13.26
8.33333	14.23
8.375	14.26
8.41667	15.04
8.45833	16.14
8.5	16.87
8.54167	18.89
8.58333	17.41
8.625	18.51
8.66667	18.06
8.70833	16.74
8.75	15.69
8.79167	15.18
8.83333	14.97
8.875	14.6
8.91667	14.36
8.95833	14.15
9	14.07
9.04167	13.77
9.08333	12.48
9.125	12.19
9.16667	11.6
9.20833	10.77
9.25	10.72
9.29167	11.16
9.33333	13.68
9.375	14.99
9.41667	17.09
9.45833	18.52
9.5	20.47
9.54167	22.35
9.58333	23.75
9.625	22.19
9.66667	19.34
9.70833	17.4
9.75	15.26
9.79167	14.48
9.83333	14.27
9.875	14.49
9.91667	14.31
9.95833	14.28
10	14.19
10.0417	13.93
10.0833	13.23
10.125	12.79
10.1667	12.56
10.2083	12.51
10.25	12.37
10.2917	12.44
10.3333	14.39
10.375	17.86
10.4167	20.25
10.4583	23.11
10.5	24.93
10.5417	24.68
10.5833	26.02
10.625	23.31
10.6667	17.1
10.7083	14.67
10.75	12.94
10.7917	11.6
10.8333	11.29
10.875	11.18
10.9167	11.03
10.9583	10.92
11	10.72
11.0417	10.61
11.0833	10.39
11.125	10.05
11.1667	9.59
11.2083	9.38
11.25	9.31
11.2917	9.4
11.3333	11.04
11.375	13.78
11.4167	15.52
11.4583	18.63
11.5	23.33
11.5417	24.59
11.5833	23.24
11.625	21.97
11.6667	15.33
11.7083	12.91
11.75	11.1
11.7917	9.95
11.8333	9.08
11.875	8.67
11.9167	8.61
11.9583	8.59
12	8.8
12.0417	8.68
12.0833	8.58
12.125	8.5
12.1667	8.54
12.2083	8.35
12.25	8.08
12.2917	8.21
12.3333	10.38
12.375	13.71
12.4167	14.52
12.4583	16.49
12.5	18.36
12.5417	18.21
12.5833	16.3
12.625	14.05
12.6667	11.81
12.7083	10.62
12.75	9.52
12.7917	8.69
12.8333	8.21
12.875	8.11
12.9167	7.78
12.9583	7.44
13	7.12
13.0417	6.98
13.0833	6.82
13.125	7.16
13.1667	7.53
13.2083	8.31
13.25	8.46
13.2917	8.92
13.3333	10.38
13.375	11.85
13.4167	12.61
13.4583	12.65
13.5	12.95
13.5417	12.89
13.5833	13.2
13.625	12.93
13.6667	12.37
13.7083	12.05
13.75	12.33
13.7917	12.49
13.8333	12.64
13.875	12.74
13.9167	12.33
13.9583	11.74
14	11.57
14.0417	11.18
14.0833	10.49
14.125	10.56
14.1667	10.22
14.2083	9.98
14.25	9.56
14.2917	9.47
14.3333	10.81
14.375	13.06
14.4167	15.63
14.4583	17.75
14.5	17.7
14.5417	17.73
14.5833	16.97
14.625	14.34
14.6667	12.81
14.7083	10.51
14.75	8.82
14.7917	9.47
14.8333	9.81
14.875	10.14
14.9167	10.33
14.9583	10.6
15	11.03
15.0417	11.41
15.0833	11.73
15.125	11.96
15.1667	12.53
15.2083	12.37
15.25	12.62
15.2917	12.97
15.3333	13.73
15.375	14.88
15.4167	18.32
15.4583	18.29
15.5	18.06
15.5417	18.84
15.5833	21.1
15.625	18.75
15.6667	17.13
15.7083	15.16
15.75	12.9
15.7917	11.35
15.8333	10.69
15.875	10.86
15.9167	11.02
15.9583	11.24
16	12.18
16.0417	10.66
16.0833	9.6
16.125	8.85
16.1667	7.56
16.2083	6.86
16.25	6.9
16.2917	6.68
16.3333	10.2
16.375	13.16
16.4167	15.31
16.4583	14.54
16.5	18.16
16.5417	18.25
16.5833	17.97
16.625	16.84
16.6667	13.97
16.7083	11.95
16.75	9.58
16.7917	8.8
16.8333	8.08
16.875	7.45
16.9167	7.72
16.9583	7.42
17	7.39
17.0417	6.89
17.0833	6.73
17.125	6
17.1667	5.85
17.2083	6.05
17.25	6.61
17.2917	6.51
17.3333	7.88
17.375	10.82
17.4167	12.66
17.4583	14.3
17.5	15.49
17.5417	15.11
17.5833	17.92
17.625	13.9
17.6667	12.46
17.7083	13.1
17.75	12.83
17.7917	12.31
17.8333	12.37
17.875	12.45
17.9167	11.91
17.9583	12.07
18	12.14
18.0417	12.11
18.0833	12.01
18.125	11.05
18.1667	11.2
18.2083	11.59
18.25	11.78
18.2917	11.69
18.3333	12.05
18.375	13.01
18.4167	13.89
18.4583	17.39
18.5	16.03
18.5417	19.03
18.5833	17.55
18.625	15.82
18.6667	14.57
18.7083	12.07
18.75	9.43
18.7917	8.68
18.8333	7.24
18.875	6.75
18.9167	6.1
18.9583	5.99
19	5.62
19.0417	4.49
19.0833	4.52
19.125	5.29
19.1667	5.45
19.2083	6.54
19.25	7.05
19.2917	7.38
19.3333	8.08
19.375	8.84
19.4167	9.21
19.4583	10.75
19.5	10.73
19.5417	11.77
19.5833	11.66
19.625	11.27
19.6667	10.85
19.7083	10.46
19.75	10.22
19.7917	10.07
19.8333	9.91
19.875	9.69
19.9167	9.52
19.9583	9.46
20	9.41
20.0417	9.37
20.0833	9.35
20.125	9.27
20.1667	9.23
20.2083	9.18
20.25	9.17
20.2917	9.2
20.3333	9.51
20.375	9.96
20.4167	10.73
20.4583	11.26
20.5	11.89
20.5417	13.27
20.5833	13.15
20.625	12.46
20.6667	11.43
20.7083	10.8
20.75	10.24
20.7917	9.92
20.8333	9.61
20.875	9.43
20.9167	9.32
20.9583	9.14
21	9.04
21.0417	8.92
21.0833	8.78
21.125	8.48
21.1667	8.61
21.2083	8.62
21.25	8.59
21.2917	8.68
21.3333	9.1
21.375	9.66
21.4167	10.37
21.4583	10.29
21.5	11.22
21.5417	11.3
21.5833	11.38
21.625	11.2
21.6667	10.65
21.7083	10.06
21.75	9.68
21.7917	9.48
21.8333	9.26
21.875	9.21
21.9167	8.62
21.9583	8.86
22	7.76
22.0417	6.37
22.0833	7.37
22.125	8.37
22.1667	8.49
22.2083	8.51
22.25	8.59
22.2917	8.64
22.3333	10.18
22.375	12.38
22.4167	12.22
22.4583	12.1
22.5	12.18
22.5417	11.32
22.5833	11.13
22.625	11
22.6667	10.65
22.7083	10.42
22.75	10.17
22.7917	9.99
22.8333	9.91
22.875	9.88
22.9167	9.87
22.9583	9.92
23	9.88
23.0417	9.82
23.0833	9.85
23.125	9.99
23.1667	10.01
23.2083	10.09
23.25	10.09
23.2917	9.96
23.3333	9.96
23.375	9.95
23.4167	10.1
23.4583	10.37
23.5	10.66
23.5417	10.54
23.5833	10.6
23.625	10.13
23.6667	9.68
23.7083	9.24
23.75	9.25
23.7917	9.25
23.8333	9.28
23.875	9.22
23.9167	9.03
23.9583	8.96
24	8.88
24.0417	8.78
24.0833	8.77
24.125	8.79
24.1667	8.88
24.2083	9.06
24.25	9.09
24.2917	9.16
24.3333	9.58
24.375	10.71
24.4167	11.68
24.4583	13.35
24.5	14.31
24.5417	14.04
24.5833	12.98
24.625	12.3
24.6667	11.99
24.7083	11.52
24.75	11.22
24.7917	11.16
24.8333	11.28
24.875	11.58
24.9167	11.81
24.9583	11.97
25	12.14
25.0417	12.25
25.0833	12.27
25.125	12.45
25.1667	12.76
25.2083	12.94
25.25	12.91
25.2917	12.88
25.3333	13.42
25.375	14.21
25.4167	15.41
25.4583	15.4
25.5	15.29
25.5417	15.2
25.5833	14.96
25.625	14.51
25.6667	13.89
25.7083	13.6
25.75	13.4
25.7917	13.6
25.8333	13.56
25.875	12.5
25.9167	11.78
25.9583	11.14
26	11.04
26.0417	11.33
26.0833	11.05
26.125	11.49
26.1667	11.06
26.2083	10.45
26.25	10.74
26.2917	11.32
26.3333	11.36
26.375	12.37
26.4167	13.94
26.4583	14.23
26.5	14.9
26.5417	14.01
26.5833	13.12
26.625	12.19
26.6667	12.17
26.7083	11.39
26.75	10.9
26.7917	10.68
26.8333	10.6
26.875	10.36
26.9167	10.09
26.9583	8.86
27	7.57
27.0417	7.02
27.0833	7.15
27.125	6.46
27.1667	7.48
27.2083	7.77
27.25	8.41
27.2917	7.91
27.3333	9.17
27.375	10.75
27.4167	11.7
27.4583	12.7
27.5	13.6
27.5417	14.28
27.5833	12.81
27.625	12.24
27.6667	11.74
27.7083	11.28
27.75	10.86
27.7917	10.76
27.8333	10.65
27.875	10.66
27.9167	10.52
27.9583	10.56
28	10.59
28.0417	10.66
28.0833	10.32
28.125	10.26
28.1667	10.58
28.2083	10.7
28.25	10.75
28.2917	10.82
28.3333	11.14
28.375	11.6
28.4167	12.05
28.4583	12.51
28.5	11.84
28.5417	11.56
28.5833	11.12
28.625	10.45
28.6667	9.84
28.7083	9.45
28.75	9.11
28.7917	8.81
28.8333	8.6
28.875	8.38
28.9167	8.32
28.9583	8.26
29	8.24
29.0417	8.14
29.0833	8.12
29.125	8.11
29.1667	8.1
29.2083	8.12
29.25	8.24
29.2917	8.41
29.3333	8.5
29.375	8.81
29.4167	9.19
29.4583	9.38
29.5	9.45
29.5417	9.53
29.5833	9.13
29.625	8.96
29.6667	8.67
29.7083	8.48
29.75	8.36
29.7917	8.33
29.8333	8.23
29.875	8.12
29.9167	8.01
29.9583	7.98
30	7.93
30.0417	7.71
30.0833	7.73
30.125	7.78
30.1667	7.76
30.2083	7.51
30.25	7.95
30.2917	8.12
30.3333	8.75
30.375	10.03
30.4167	10.45
30.4583	10.49
30.5	10.85
30.5417	10.8
30.5833	10.86
30.625	10.76
30.6667	10.28
30.7083	10.04
30.75	9.9
30.7917	9.77
30.8333	9.67
30.875	9.58
30.9167	9.49
30.9583	9.28
31	9.02
31.0417	9.11
31.0833	9.07
31.125	9.04
31.1667	8.96
31.2083	8.83
31.25	8.76
31.2917	8.69
31.3333	8.79
31.375	9.37
31.4167	10.03
31.4583	10.64
31.5	12.69
31.5417	13.15
31.5833	13.17
31.625	12.51
31.6667	11.21
31.7083	10.48
31.75	10.16
31.7917	10.06
31.8333	10.11
31.875	10.26
31.9167	10.4
31.9583	9.3
32	9.65
32.0417	9.7
32.0833	8.23
32.125	7.04
32.1667	6.42
32.2083	5.96
32.25	5.39
32.2917	6.5
32.3333	8.42
32.375	10.07
32.4167	12.32
32.4583	12.97
32.5	13.17
32.5417	13.73
32.5833	12.98
32.625	12.2
32.6667	11.86
32.7083	10.39
32.75	10.74
32.7917	10.45
32.8333	10.51
32.875	10.54
32.9167	10.22
32.9583	10.23
33	9.29
33.0417	9.72
33.0833	9.91
33.125	10.13
33.1667	9.71
33.2083	9.92
33.25	9.76
33.2917	9.88
33.3333	9.9
33.375	11.51
33.4167	12.98
33.4583	13.62
33.5	13.82
33.5417	13.76
33.5833	13.82
33.625	13.37
33.6667	12.85
33.7083	12.1
33.75	11.29
33.7917	10.81
33.8333	11.13
33.875	9.64
33.9167	8.97
33.9583	8.67
34	8.52
34.0417	8.19
34.0833	7.91
34.125	7.68
34.1667	7.77
34.2083	8.15
34.25	8.04
34.2917	8.06
34.3333	8.25
34.375	10.41
34.4167	12.57
34.4583	13.54
34.5	12.45
34.5417	12.22
34.5833	12.22
34.625	10.69
34.6667	9.49
34.7083	8.03
34.75	6.82
34.7917	5.96
34.8333	4.95
34.875	4.16
34.9167	4.27
34.9583	4.7
35	4.2
35.0417	3.27
35.0833	2.57
35.125	2.3
35.1667	4.44
35.2083	3.72
35.25	3.44
35.2917	5.59
35.3333	6.48
35.375	6.98
35.4167	8.46
35.4583	10.23
35.5	11.72
35.5417	9.96
35.5833	10.88
35.625	10.96
35.6667	9.33
35.7083	6.97
35.75	6.05
35.7917	5.39
35.8333	4.82
35.875	4.56
35.9167	4.3
35.9583	3.62
36	3.72
36.0417	3.25
36.0833	2.69
36.125	2.31
36.1667	1.7
36.2083	1.48
36.25	2.35
36.2917	0.99
36.3333	2.19
36.375	3.74
36.4167	5.79
36.4583	8.3
36.5	8.5
36.5417	8.72
36.5833	9.22
36.625	8.94
36.6667	7.89
36.7083	6.22
36.75	4.58
36.7917	3.5
36.8333	2.67
36.875	2.14
36.9167	1.61
36.9583	0.86
37	0.67
37.0417	0.74
37.0833	1.59
37.125	2.29
37.1667	2.75
37.2083	3.1
37.25	3.45
37.2917	3.69
37.3333	4.19
37.375	4.87
37.4167	5.88
37.4583	7.02
37.5	7.83
37.5417	9.03
37.5833	9.28
37.625	9.49
37.6667	9.1
37.7083	8.39
37.75	8.23
37.7917	8.12
37.8333	8.11
37.875	8.31
37.9167	8.53
37.9583	8.67
38	8.9
38.0417	9
38.0833	9.08
38.125	9.14
38.1667	9.18
38.2083	9.24
38.25	9.26
38.2917	9.39
38.3333	9.52
38.375	10.24
38.4167	11.05
38.4583	11.8
38.5	12.12
38.5417	12.79
38.5833	13.19
38.625	12.94
38.6667	12.34
38.7083	11.42
38.75	11.06
38.7917	10.99
38.8333	10.87
38.875	10.64
38.9167	9.52
38.9583	9.67
39	9.79
39.0417	9.68
39.0833	9.41
39.125	8.7
39.1667	7.84
39.2083	7.91
39.25	8
39.2917	7.8
39.3333	8.49
39.375	9.78
39.4167	13
39.4583	13.45
39.5	14.68
39.5417	15.32
39.5833	14.98
39.625	14.78
39.6667	13.05
39.7083	11.98
39.75	11.62
39.7917	11.45
39.8333	11
39.875	10.12
39.9167	8.89
39.9583	7.8
40	6.96
40.0417	6.42
40.0833	6.15
40.125	6.06
40.1667	7.55
40.2083	8.18
40.25	8.55
40.2917	9.57
40.3333	10.19
40.375	10.91
40.4167	11.4
40.4583	12.43
40.5	12.55
40.5417	12.88
40.5833	12.35
40.625	11.7
40.6667	10.7
40.7083	9.12
40.75	8.46
40.7917	7.96
40.8333	7.56
40.875	6.71
40.9167	6.08
40.9583	6.36
41	7.78
41.0417	8.13
41.0833	7.51
41.125	6.79
41.1667	7.31
41.2083	8.51
41.25	8.63
41.2917	8.87
41.3333	9.13
41.375	9.71
41.4167	10.97
41.4583	11.69
41.5	11.71
41.5417	12.07
41.5833	12.32
41.625	11.1
41.6667	10.17
41.7083	9.46
41.75	8.92
41.7917	8.08
41.8333	8.23
41.875	8.36
41.9167	8.33
41.9583	7.98
42	7.9
42.0417	7.91
42.0833	8.07
42.125	8.09
42.1667	8.08
42.2083	8.06
42.25	8.06
42.2917	8.08
42.3333	8.18
42.375	8.12
42.4167	7.93
42.4583	7.96
42.5	8.07
42.5417	8.19
42.5833	8.25
42.625	8.31
42.6667	8.38
42.7083	8.54
42.75	8.7
42.7917	8.26
42.8333	8.02
42.875	7.76
42.9167	7.65
42.9583	7.5
43	7.39
43.0417	7.33
43.0833	7.23
43.125	7.21
43.1667	7.22
43.2083	7.21
43.25	7.17
43.2917	7.19
43.3333	7.27
43.375	7.41
43.4167	7.7
43.4583	8
43.5	8.22
43.5417	8.27
43.5833	8.48
43.625	8.25
43.6667	7.75
43.7083	7.34
43.75	7.11
43.7917	6.94
43.8333	6.9
43.875	6.87
43.9167	6.87
43.9583	6.84
44	6.83
44.0417	6.83
44.0833	6.79
44.125	6.81
44.1667	6.87
44.2083	6.84
44.25	6.74
44.2917	6.77
44.3333	6.87
44.375	7.71
44.4167	8.22
44.4583	8.5
44.5	10.47
44.5417	10
44.5833	10.26
44.625	9.58
44.6667	8.78
44.7083	8.35
44.75	8.02
44.7917	7.69
44.8333	7.55
44.875	6.52
44.9167	4.45
44.9583	3.44
45	2.63
45.0417	2.19
45.0833	1.67
45.125	1.35
45.1667	1.5
45.2083	3.23
45.25	4.1
45.2917	4.56
45.3333	5.1
45.375	4.82
45.4167	6.49
45.4583	7.61
45.5	9.18
45.5417	9.13
45.5833	9.03
45.625	8.92
45.6667	7.59
45.7083	7.46
45.75	6.96
45.7917	7.05
45.8333	7.15
45.875	7.08
45.9167	6.51
45.9583	4.54
46	3.52
46.0417	2.81
46.0833	4.15
46.125	3.42
46.1667	2.44
46.2083	1.92
46.25	1.66
46.2917	1.4
46.3333	1.74
46.375	2.66
46.4167	3.52
46.4583	5.71
46.5	7.87
46.5417	9.1
46.5833	9.07
46.625	8.25
46.6667	7.08
46.7083	6.15
46.75	5.52
46.7917	7.02
46.8333	7.54
46.875	7.84
46.9167	8.11
46.9583	8.13
47	8.1
47.0417	8.12
47.0833	8.14
47.125	8.13
47.1667	8.16
47.2083	8.08
47.25	7.97
47.2917	7.87
47.3333	7.86
47.375	8.02
47.4167	8.69
47.4583	9.04
47.5	9.5
47.5417	9.37
47.5833	9.55
47.625	9.41
47.6667	9.08
47.7083	8.73
47.75	8.57
47.7917	8.24
47.8333	7.94
47.875	7.77
47.9167	7.55
47.9583	7.46
48	7.7
48.0417	8.04
48.0833	8.14
48.125	7.6
48.1667	6.24
48.2083	4.99
48.25	4.97
48.2917	6.03
48.3333	5.47
48.375	6.24
48.4167	5.74
48.4583	7.21
48.5	8.56
48.5417	8.68
48.5833	8.42
48.625	7.93
48.6667	7.1
48.7083	7.02
48.75	5.96
48.7917	5.26
48.8333	3.78
48.875	5.1
48.9167	5.42
48.9583	6.12
49	6.67
49.0417	7
49.0833	7.25
49.125	7.31
49.1667	7.33
49.2083	7.4
49.25	7.5
49.2917	7.62
49.3333	7.76
49.375	8.05
49.4167	8.52
49.4583	8.96
49.5	9.08
49.5417	9.17
49.5833	9.35
49.625	9.4
49.6667	9.44
49.7083	9.48
49.75	9.47
49.7917	9.45
49.8333	9.39
49.875	9.32
49.9167	9.28
49.9583	9.23
50	9.1
50.0417	8.91
50.0833	8.74
50.125	8.65
50.1667	8.57
50.2083	8.48
50.25	8.35
50.2917	8.26
50.3333	8.22
50.375	8.19
50.4167	8.28
50.4583	8.33
50.5	8.43
50.5417	8.61
50.5833	8.59
50.625	8.53
50.6667	8.39
50.7083	8.18
50.75	8.05
50.7917	7.91
50.8333	7.79
50.875	7.69
50.9167	7.58
50.9583	7.54
51	7.55
51.0417	7.55
51.0833	7.53
51.125	7.52
51.1667	7.53
51.2083	7.56
51.25	7.65
51.2917	7.75
51.3333	7.86
51.375	8.12
51.4167	8.36
51.4583	8.44
51.5	8.48
51.5417	8.56
51.5833	8.57
51.625	8.52
51.6667	8.49
51.7083	8.49
51.75	8.53
51.7917	8.53
51.8333	8.49
51.875	8.46
51.9167	8.33
51.9583	8.06
52	7.89
52.0417	7.83
52.0833	7.76
52.125	7.63
52.1667	7.53
52.2083	7.6
52.25	7.35
52.2917	7.28
52.3333	7.28
52.375	7.3
52.4167	7.54
52.4583	7.77
52.5	7.94
52.5417	7.81
52.5833	7.62
52.625	7.41
52.6667	7.25
52.7083	7.12
52.75	7.11
52.7917	7.11
52.8333	7.06
52.875	7.18
52.9167	7.3
52.9583	7.38
53	7.37
53.0417	7.36
53.0833	7.27
53.125	7.15
53.1667	6.89
53.2083	6.7
53.25	6.65
53.2917	6.9
53.3333	6.96
53.375	6.99
53.4167	7
53.4583	7.06
53.5	7.1
53.5417	7.07
53.5833	6.94
53.625	6.8
53.6667	6.67
53.7083	6.67
53.75	6.76
53.7917	6.79
53.8333	6.79
53.875	6.82
53.9167	6.84
53.9583	6.88
54	6.84
54.0417	6.85
54.0833	6.78
54.125	6.78
54.1667	6.82
54.2083	6.84
54.25	6.75
54.2917	6.71
54.3333	6.65
54.375	6.7
54.4167	6.83
54.4583	6.99
54.5	7.16
54.5417	7.32
54.5833	7.44
54.625	7.25
54.6667	7.15
54.7083	7.15
54.75	7.11
54.7917	7.09
54.8333	7.04
54.875	7.01
54.9167	7
54.9583	6.97
55	6.91
55.0417	6.84
55.0833	6.76
55.125	6.76
55.1667	6.68
55.2083	6.68
55.25	6.63
55.2917	6.48
55.3333	6.37
55.375	6.17
55.4167	6
55.4583	5.88
55.5	5.69
55.5417	5.56
55.5833	5.39
55.625	5.22
55.6667	5.09
55.7083	4.98
55.75	4.96
55.7917	4.95
55.8333	5
55.875	5
55.9167	4.95
55.9583	4.85
56	4.71
56.0417	4.59
56.0833	4.47
56.125	4.35
56.1667	4.26
56.2083	4.14
56.25	4.06
56.2917	4.03
56.3333	4.05
56.375	4.08
56.4167	4.18
56.4583	4.27
56.5	4.33
56.5417	4.41
56.5833	4.3
56.625	4.1
56.6667	3.92
56.7083	3.82
56.75	3.79
56.7917	3.78
56.8333	3.85
56.875	3.87
56.9167	3.9
56.9583	3.95
57	4.03
57.0417	4.09
57.0833	4.18
57.125	4.24
57.1667	4.29
57.2083	4.3
57.25	4.31
57.2917	4.35
57.3333	4.41
57.375	4.56
57.4167	4.9
57.4583	5.37
57.5	5.54
57.5417	5.52
57.5833	5.58
57.625	5.51
57.6667	5.37
57.7083	5.3
57.75	5.27
57.7917	5.22
57.8333	5.19
57.875	5.07
57.9167	5.09
57.9583	5.02
58	5.02
58.0417	4.99
58.0833	4.97
58.125	4.92
58.1667	4.88
58.2083	4.77
58.25	4.67
58.2917	4.6
58.3333	4.55
58.375	4.68
58.4167	5.16
58.4583	5.8
58.5	6.37
58.5417	6.79
58.5833	6.92
58.625	6.52
58.6667	5.87
58.7083	5.5
58.75	5.3
58.7917	5.05
58.8333	4.89
58.875	4.51
58.9167	4.09
58.9583	3.17
59	2.56
59.0417	1.58
59.0833	0.71
59.125	0.3
59.1667	-0.11
59.2083	0.33
59.25	0.1
59.2917	-0.08
59.3333	-0.22
59.375	0.17
59.4167	0.57
59.4583	2.77
59.5	4.35
59.5417	4.77
59.5833	4.94
59.625	4.63
59.6667	4.42
59.7083	4.17
59.75	3.99
59.7917	3.92
59.8333	3.54
59.875	3.11
59.9167	3.2
59.9583	3.48
60	3.65
60.0417	3.79
60.0833	3.93
60.125	4.02
60.1667	4.19
60.2083	4.27
60.25	4.5
60.2917	4.59
60.3333	4.64
60.375	4.89
60.4167	5.35
60.4583	5.98
60.5	5.86
60.5417	6.25
60.5833	6.07
60.625	5.8
60.6667	5.54
60.7083	5.46
60.75	5.5
60.7917	5.45
60.8333	5.68
60.875	5.8
60.9167	5.87
60.9583	5.96
61	5.99
61.0417	6.07
61.0833	6.11
61.125	5.94
61.1667	6.11
61.2083	6.04
61.25	6.18
61.2917	6.21
61.3333	6.21
61.375	6.31
61.4167	6.46
61.4583	6.58
61.5	7.07
61.5417	7.19
61.5833	8.23
61.625	6.81
61.6667	5.03
61.7083	4.07
61.75	3.69
61.7917	3.15
61.8333	3.08
61.875	2.64
61.9167	2.56
61.9583	2.54
62	1.8
62.0417	2.07
62.0833	2.09
62.125	3.37
62.1667	1.83
62.2083	1.39
62.25	0.97
62.2917	0.66
62.3333	0.34
62.375	0.65
62.4167	1
62.4583	1.95
62.5	2.55
62.5417	2.75
62.5833	4.21
62.625	4.92
62.6667	2.15
62.7083	0.77
62.75	0.06
62.7917	-0.63
62.8333	0.19
62.875	0.27
62.9167	0.86
62.9583	1.61
63	1.97
63.0417	2.37
63.0833	2.73
63.125	2.86
63.1667	3
63.2083	3.09
63.25	2.99
63.2917	2.92
63.3333	2.92
63.375	3.36
63.4167	4.18
63.4583	5.33
63.5	5.7
63.5417	5.46
63.5833	5.27
63.625	5.03
63.6667	4.51
63.7083	4.21
63.75	3.95
63.7917	3.84
63.8333	3.75
63.875	3.67
63.9167	3.61
63.9583	3.58
64	3.48
64.0417	3.53
64.0833	3.58
64.125	3.56
64.1667	2.61
64.2083	2.24
64.25	2.76
64.2917	3.22
64.3333	3.51
64.375	3.78
64.4167	4.44
64.4583	5.5
64.5	5.55
64.5417	7.32
64.5833	6.02
64.625	4.88
64.6667	2.95
64.7083	2.55
64.75	2.06
64.7917	1.6
64.8333	1.64
64.875	2
64.9167	2.35
64.9583	3.15
65	3.32
65.0417	3.35
65.0833	2.39
65.125	1.18
65.1667	-0.14
65.2083	-0.44
65.25	0.1
65.2917	1.14
65.3333	1.82
65.375	1.95
65.4167	2.58
65.4583	2.39
65.5	2.4
65.5417	2.75
65.5833	2.65
65.625	2.04
65.6667	1.8
65.7083	1.33
65.75	1.17
65.7917	1.06
65.8333	0.94
65.875	0.92
65.9167	0.88
65.9583	0.98
66	1.06
66.0417	1.29
66.0833	1.35
66.125	1.16
66.1667	1.24
66.2083	1.16
66.25	1.07
66.2917	0.94
66.3333	0.79
66.375	0.95
66.4167	1.29
66.4583	1.88
66.5	2.11
66.5417	1.77
66.5833	1.66
66.625	1.18
66.6667	-0.18
66.7083	-0.8
66.75	-0.08
66.7917	0.62
66.8333	1.31
66.875	1.43
66.9167	1.35
66.9583	1.56
67	0.9
67.0417	-0.48
67.0833	-0.33
67.125	0.31
67.1667	-0.23
67.2083	-0.05
67.25	-0.03
67.2917	0.05
67.3333	-0.29
67.375	-0.18
67.4167	0.31
67.4583	1.23
67.5	1.8
67.5417	2.25
67.5833	1.23
67.625	0.13
67.6667	-1.15
67.7083	-0.71
67.75	-0.89
67.7917	-0.92
67.8333	-0.99
67.875	-1.15
67.9167	-1.34
67.9583	-1.64
68	-1.66
68.0417	-1.5
68.0833	-1.34
68.125	-0.73
68.1667	-0.21
68.2083	-0.11
68.25	-0.08
68.2917	-0.02
68.3333	0.02
68.375	0.09
68.4167	0.13
68.4583	0.25
68.5	0.36
68.5417	0.34
68.5833	0.21
68.625	0.08
68.6667	-0.03
68.7083	0.03
68.75	0.11
68.7917	0.17
68.8333	0.14
68.875	0.12
68.9167	0.2
68.9583	0.23
69	0.22
69.0417	0.31
69.0833	0.36
69.125	0.43
69.1667	0.52
69.2083	0.58
69.25	0.63
69.2917	0.72
69.3333	0.77
69.375	0.82
69.4167	1.2
69.4583	1.71
69.5	2.13
69.5417	2.44
69.5833	2.22
69.625	1.91
69.6667	1.45
69.7083	1.25
69.75	1.17
69.7917	1.13
69.8333	1.1
69.875	1.11
69.9167	1.21
69.9583	1.22
70	1.2
70.0417	1.11
70.0833	1.06
70.125	1.03
70.1667	1
70.2083	0.98
70.25	0.95
70.2917	0.88
70.3333	0.84
70.375	0.79
70.4167	0.95
70.4583	1.07
70.5	1.22
70.5417	1.47
70.5833	1.58
70.625	1.36
70.6667	1.1
70.7083	0.86
70.75	0.73
70.7917	0.56
70.8333	0.46
70.875	0.03
70.9167	0.12
70.9583	0.1
71	0.2
71.0417	0.04
71.0833	0.12
71.125	0.21
71.1667	0.24
71.2083	0.23
71.25	0.16
71.2917	0.2
71.3333	0.26
71.375	0.44
71.4167	0.9
71.4583	1.37
71.5	1.72
71.5417	2.08
71.5833	2.05
71.625	1.79
71.6667	1.5
71.7083	1.31
71.75	0.99
71.7917	0.61
71.8333	-0.25
71.875	0.51
71.9167	0.97
71.9583	1.33
72	1.66
72.0417	2.05
72.0833	2.29
72.125	2.37
72.1667	2.37
72.2083	2.48
72.25	2.53
72.2917	3.03
72.3333	3.31
72.375	3.52
72.4167	3.67
72.4583	3.85
72.5	4.11
72.5417	4.18
72.5833	4.11
72.625	3.81
72.6667	3.5
72.7083	3.35
72.75	3.23
72.7917	2.82
72.8333	2.03
72.875	2.02
72.9167	2.06
72.9583	2.26
73	2.41
73.0417	2.5
73.0833	2.8
73.125	2.98
73.1667	3.16
73.2083	3.27
73.25	3.37
73.2917	3.5
73.3333	3.63
73.375	3.79
73.4167	4.18
73.4583	4.62
73.5	4.91
73.5417	5.3
73.5833	5.17
73.625	5.1
73.6667	3.32
73.7083	1.45
73.75	0.56
73.7917	-0.05
73.8333	-0.89
73.875	-0.16
73.9167	-0.27
73.9583	-0.39
74	-0.42
74.0417	-0.42
74.0833	-0.47
74.125	-0.6
74.1667	-0.72
74.2083	-0.74
74.25	-0.9
74.2917	-0.61
74.3333	-0.33
74.375	-0.1
74.4167	0.17
74.4583	0.5
74.5	0.7
74.5417	0.86
74.5833	2.53
74.625	2.73
74.6667	2.64
74.7083	2.44
74.75	2.68
74.7917	3.03
74.8333	3.15
74.875	3.28
74.9167	3.22
74.9583	3.27
75	3.11
75.0417	2.99
75.0833	2.99
75.125	3.01
75.1667	1.98
75.2083	2.11
75.25	1.71
75.2917	1.34
75.3333	0.2
75.375	-0.4
75.4167	-0.19
75.4583	0.31
75.5	1.27
75.5417	1.99
75.5833	0.89
75.625	1.99
75.6667	1.77
75.7083	1.76
75.75	1.73
75.7917	1.78
75.8333	1.13
75.875	1.27
75.9167	-0.27
75.9583	-0.11
76	-0.3
76.0417	-0.33
76.0833	-0.41
76.125	-0.03
76.1667	0
76.2083	0.01
76.25	0.05
76.2917	0.08
76.3333	0.02
76.375	0.1
76.4167	0.4
76.4583	2.09
76.5	3.23
76.5417	3.85
76.5833	3.09
76.625	2.89
76.6667	1.7
76.7083	2.05
76.75	2.42
76.7917	2.49
76.8333	2.5
76.875	2.51
76.9167	2.15
76.9583	2.42
77	2.42
77.0417	2.41
77.0833	2.39
77.125	2.38
77.1667	2.18
77.2083	1.93
77.25	1.92
77.2917	2
77.3333	1.85
77.375	1.52
77.4167	1.92
77.4583	1.73
77.5	2.04
77.5417	2.74
77.5833	3.07
77.625	3.25
77.6667	2.36
77.7083	2.29
77.75	1.01
77.7917	0.48
77.8333	0.36
77.875	0.1
77.9167	0.13
77.9583	0.01
78	1.51
78.0417	2.11
78.0833	2.37
78.125	2.52
78.1667	1.74
78.2083	1.31
78.25	1.59
78.2917	2.07
78.3333	1.52
78.375	1.99
78.4167	2.76
78.4583	3.2
78.5	3.4
78.5417	3.54
78.5833	3.81
78.625	3.27
78.6667	3.12
78.7083	2.55
78.75	1.31
78.7917	1.56
78.8333	1.38
78.875	1.9
78.9167	2.03
78.9583	2.04
79	1.61
79.0417	1.68
79.0833	1.77
79.125	1.84
79.1667	1.95
79.2083	1.41
79.25	1.57
79.2917	1.9
79.3333	1.87
79.375	0.98
79.4167	1.8
79.4583	2.92
79.5	3.48
79.5417	3.61
79.5833	3.28
79.625	2.48
79.6667	2.33
79.7083	2.91
79.75	4.43
79.7917	4.69
79.8333	4.58
79.875	4.18
79.9167	3.16
79.9583	2.73
80	2.8
80.0417	2.22
80.0833	1.84
80.125	1.57
80.1667	0.96
80.2083	1.73
80.25	1.53
80.2917	2.23
80.3333	2.93
80.375	3.23
80.4167	3.36
80.4583	3.96
80.5	4.77
80.5417	4.45
80.5833	4.71
80.625	3.76
80.6667	2.51
80.7083	1.78
80.75	0.7
80.7917	0.13
80.8333	-0.26
80.875	-0.62
80.9167	-0.83
80.9583	-0.34
81	-0.32
81.0417	-0.37
81.0833	-0.33
81.125	-0.38
81.1667	-0.38
81.2083	-0.5
81.25	-0.62
81.2917	-0.76
81.3333	-0.69
81.375	-0.47
81.4167	-0.21
81.4583	0.15
81.5	0.34
81.5417	0.04
81.5833	-0.18
81.625	0.02
81.6667	-0.16
81.7083	-0.12
81.75	0
81.7917	-0.07
81.8333	-0.11
81.875	0.27
81.9167	0.27
81.9583	0.73
82	1.02
82.0417	1.24
82.0833	1.41
82.125	1.62
82.1667	1.73
82.2083	1.36
82.25	1.37
82.2917	1.73
82.3333	1.92
82.375	2.07
82.4167	2.33
82.4583	2.8
82.5	2.85
82.5417	2.81
82.5833	2.99
82.625	3.11
82.6667	3.03
82.7083	3.21
82.75	3.05
82.7917	2.94
82.8333	2.8
82.875	1.23
82.9167	1.74
82.9583	0.33
83	-0.39
83.0417	-0.66
83.0833	-0.23
83.125	-0.27
83.1667	-0.4
83.2083	-0.23
83.25	-0.2
[truncated: 2,802 more rows]

## Sheet: Norwich_16
Days_from_sowing	Temperature_oC
0.375	23.8551
0.395833	25.1498
0.416667	29.2275
0.4375	31.3146
0.458333	32.7721
0.479167	34.9481
0.5	36.256
0.520833	35.8455
0.541667	35.4673
0.5625	35.0901
0.583333	34.127
0.604167	33.0148
0.625	32.1799
0.645833	31.0649
0.666667	29.2003
0.6875	27.6099
0.708333	26.3774
0.729167	24.8223
0.75	23.334
0.770833	21.9364
0.791667	21.0593
0.8125	20.527
0.833333	20.0534
0.854167	19.8976
0.875	19.5314
0.895833	18.9773
0.916667	18.6258
0.9375	18.4004
0.958333	18.1533
0.979167	17.9846
1	17.9568
1.02083	17.9927
1.04167	18.0418
1.0625	18.2253
1.08333	18.1191
1.10417	18.2755
1.125	18.2284
1.14583	18.2948
1.16667	18.624
1.1875	18.6647
1.20833	18.8824
1.22917	18.6708
1.25	18.8111
1.27083	19.0916
1.29167	19.128
1.3125	19.0733
1.33333	18.9967
1.35417	19.2041
1.375	19.0742
1.39583	18.8807
1.41667	18.5487
1.4375	18.2433
1.45833	18.1209
1.47917	18.2086
1.5	18.1128
1.52083	18.1143
1.54167	17.6951
1.5625	17.4468
1.58333	17.1916
1.60417	16.8661
1.625	17.0031
1.64583	17.0435
1.66667	16.9323
1.6875	16.5596
1.70833	16.3189
1.72917	16.1368
1.75	15.7655
1.77083	15.7229
1.79167	15.5699
1.8125	15.4439
1.83333	15.6001
1.85417	15.5549
1.875	15.5602
1.89583	15.5385
1.91667	15.5192
1.9375	15.5107
1.95833	15.4471
1.97917	15.2381
2	14.9741
2.02083	14.8655
2.04167	14.7209
2.0625	14.8647
2.08333	14.8748
2.10417	15.0801
2.125	15.0503
2.14583	15.0537
2.16667	15.0922
2.1875	15.3448
2.20833	15.5757
2.22917	15.7852
2.25	16.1642
2.27083	16.3121
2.29167	16.4327
2.3125	16.4921
2.33333	16.6081
2.35417	17.3594
2.375	17.3959
2.39583	18.5455
2.41667	18.525
2.4375	18.6619
2.45833	19.5698
2.47917	19.0949
2.5	19.6835
2.52083	19.4503
2.54167	19.8526
2.5625	20.2347
2.58333	20.7557
2.60417	20.2316
2.625	19.2136
2.64583	18.5922
2.66667	18.2539
2.6875	18.032
2.70833	17.895
2.72917	17.6645
2.75	17.5534
2.77083	17.3867
2.79167	17.2935
2.8125	17.0715
2.83333	17.0084
2.85417	16.8447
2.875	16.8956
2.89583	16.7984
2.91667	16.6762
2.9375	16.6403
2.95833	16.5374
2.97917	16.609
3	16.5489
3.02083	16.5046
3.04167	16.5128
3.0625	16.5171
3.08333	16.561
3.10417	16.4856
3.125	16.4888
3.14583	16.5755
3.16667	16.4699
3.1875	16.3041
3.20833	16.1843
3.22917	16.1577
3.25	16.1936
3.27083	16.5079
3.29167	17.5617
3.3125	18.9858
3.33333	18.7855
3.35417	18.7449
3.375	19.5726
3.39583	20.8682
3.41667	23.683
3.4375	22.6961
3.45833	23.8211
3.47917	22.532
3.5	22.0774
3.52083	23.642
3.54167	26.372
3.5625	25.6901
3.58333	24.9208
3.60417	24.9385
3.625	24.0325
3.64583	22.8097
3.66667	20.9532
3.6875	19.6003
3.70833	18.857
3.72917	18.3863
3.75	17.8773
3.77083	17.7573
3.79167	17.3869
3.8125	17.3361
3.83333	16.973
3.85417	16.2758
3.875	15.4268
3.89583	14.99
3.91667	14.3325
3.9375	14.0169
3.95833	13.7023
3.97917	13.47
4	13.3445
4.02083	13.177
4.04167	13.3333
4.0625	13.2929
4.08333	13.7142
4.10417	13.5934
4.125	13.3533
4.14583	12.9118
4.16667	12.9321
4.1875	12.7956
4.20833	12.6455
4.22917	12.5039
4.25	12.5053
4.27083	13.1191
4.29167	14.1265
4.3125	14.8216
4.33333	16.3558
4.35417	18.7177
4.375	19.4321
4.39583	21.0784
4.41667	22.7389
4.4375	24.3832
4.45833	26.1199
4.47917	26.3258
4.5	25.7352
4.52083	25.8499
4.54167	26.7615
4.5625	26.1936
4.58333	24.1147
4.60417	22.1372
4.625	20.2506
4.64583	19.7936
4.66667	19.2904
4.6875	18.5306
4.70833	17.9491
4.72917	17.3643
4.75	16.4567
4.77083	15.9514
4.79167	15.6031
4.8125	15.4355
4.83333	15.0917
4.85417	14.8147
4.875	14.8256
4.89583	14.9107
4.91667	15.0933
4.9375	15.1421
4.95833	15.2015
4.97917	15.1706
5	15.1471
5.02083	15.1173
5.04167	14.8762
5.0625	14.8039
5.08333	14.7441
5.10417	14.7223
5.125	14.7639
5.14583	14.8479
5.16667	14.9176
5.1875	15.0852
5.20833	15.1084
5.22917	15.2685
5.25	15.3879
5.27083	15.6188
5.29167	15.8905
5.3125	16.1388
5.33333	16.5611
5.35417	17.0898
5.375	18.0853
5.39583	18.8767
5.41667	18.8289
5.4375	20.0977
5.45833	20.0606
5.47917	20.8313
5.5	20.8823
5.52083	22.2285
5.54167	21.3132
5.5625	19.6849
5.58333	20.7487
5.60417	21.5613
5.625	19.7532
5.64583	18.9334
5.66667	18.1906
5.6875	18.0589
5.70833	17.7221
5.72917	17.5303
5.75	17.1202
5.77083	16.8535
5.79167	16.5538
5.8125	16.4973
5.83333	16.2916
5.85417	16.0438
5.875	15.9278
5.89583	15.6673
5.91667	15.1314
5.9375	15.2002
5.95833	14.6986
5.97917	14.1439
6	13.7255
6.02083	13.3735
6.04167	13.0354
6.0625	12.7015
6.08333	12.7881
6.10417	13.0532
6.125	13.3052
6.14583	13.195
6.16667	13.4376
6.1875	13.4565
6.20833	13.4428
6.22917	13.3472
6.25	13.1501
6.27083	13.477
6.29167	14.9463
6.3125	16.7565
6.33333	19.0602
6.35417	20.0483
6.375	22.0413
6.39583	24.0163
6.41667	25.9956
6.4375	26.6892
6.45833	27.309
6.47917	26.2634
6.5	28.4591
6.52083	27.8337
6.54167	26.8098
6.5625	24.6976
6.58333	24.4169
6.60417	23.4274
6.625	21.7647
6.64583	20.6464
6.66667	20.2381
6.6875	20.0606
6.70833	19.1161
6.72917	18.4145
6.75	17.6315
6.77083	16.7174
6.79167	16.0766
6.8125	15.6484
6.83333	15.4104
6.85417	15.1657
6.875	14.8606
6.89583	14.5867
6.91667	14.2399
6.9375	13.9864
6.95833	13.7209
6.97917	13.8263
7	13.8045
7.02083	13.8602
7.04167	13.6989
7.0625	13.8321
7.08333	13.6643
7.10417	13.5275
7.125	13.4378
7.14583	13.4711
7.16667	13.3025
7.1875	13.2242
7.20833	13.1939
7.22917	13.2438
7.25	13.5904
7.27083	14.0527
7.29167	14.7215
7.3125	15.8134
7.33333	17.1311
7.35417	17.3164
7.375	17.5811
7.39583	18.5687
7.41667	19.5715
7.4375	22.2339
7.45833	23.8174
7.47917	25.5052
7.5	25.0323
7.52083	25.9849
7.54167	24.7858
7.5625	24.5776
7.58333	23.3147
7.60417	22.1406
7.625	21.0726
7.64583	22.3687
7.66667	22.1342
7.6875	21.3162
7.70833	19.9018
7.72917	18.8498
7.75	17.85
7.77083	17.5534
7.79167	17.0774
7.8125	16.37
7.83333	15.7492
7.85417	15.4382
7.875	15.1916
7.89583	14.5632
7.91667	14.0031
7.9375	13.512
7.95833	13.3495
7.97917	13.0311
8	12.5808
8.02083	12.0849
8.04167	11.8086
8.0625	11.5555
8.08333	11.4476
8.10417	11.2597
8.125	10.7659
8.14583	10.1634
8.16667	9.84244
8.1875	9.52579
8.20833	9.24245
8.22917	9.05443
8.25	9.04939
8.27083	9.70146
8.29167	11.2104
8.3125	12.9527
8.33333	14.47
8.35417	16.2236
8.375	18.855
8.39583	20.6856
8.41667	22.6567
8.4375	23.3657
8.45833	24.6921
8.47917	26.96
8.5	27.3772
8.52083	25.9589
8.54167	25.3473
8.5625	25.723
8.58333	22.5095
8.60417	23.1159
8.625	23.4398
8.64583	22.1647
8.66667	20.5068
8.6875	19.7408
8.70833	18.2695
8.72917	17.0228
8.75	15.8425
8.77083	15.0743
8.79167	14.3359
8.8125	13.833
8.83333	13.2827
8.85417	12.9261
8.875	12.5284
8.89583	12.3209
8.91667	12.0231
8.9375	11.9042
8.95833	11.6203
8.97917	11.5126
9	11.3176
9.02083	11.1582
9.04167	11.0068
9.0625	10.6962
9.08333	10.5086
9.10417	10.5626
9.125	10.6761
9.14583	10.6542
9.16667	10.5456
9.1875	10.7139
9.20833	10.9353
9.22917	10.8353
9.25	11.1186
9.27083	11.9213
9.29167	13.7742
9.3125	15.7616
9.33333	18.0429
9.35417	19.4668
9.375	20.6517
9.39583	22.6258
9.41667	22.4
9.4375	22.6239
9.45833	25.1444
9.47917	25.7879
9.5	25.9008
9.52083	25.6419
9.54167	24.755
9.5625	24.9951
9.58333	23.1762
9.60417	22.5469
9.625	22.552
9.64583	22.044
9.66667	21.3339
9.6875	20.5925
9.70833	19.6312
9.72917	18.5676
9.75	17.8743
9.77083	17.4094
9.79167	16.9899
9.8125	16.6248
9.83333	16.1745
9.85417	15.9766
9.875	15.9721
9.89583	15.9597
9.91667	16.0159
9.9375	16.0308
9.95833	16.096
9.97917	16.2232
10	16.2528
10.0208	16.185
10.0417	16.0401
10.0625	15.9337
10.0833	16.0635
10.1042	16.04
10.125	16.1822
10.1458	15.9734
10.1667	15.8815
10.1875	15.8008
10.2083	15.7918
10.2292	15.6558
10.25	15.6472
10.2708	16.2924
10.2917	17.6209
10.3125	17.7478
10.3333	18.8769
10.3542	20.3957
10.375	21.0814
10.3958	21.2351
10.4167	21.7461
10.4375	24.1155
10.4583	24.5486
10.4792	24.4877
10.5	23.13
10.5208	20.9214
10.5417	20.2942
10.5625	19.9962
10.5833	20.0443
10.6042	22.9085
10.625	22.1322
10.6458	21.9055
10.6667	20.7248
10.6875	19.5941
10.7083	18.5339
10.7292	17.2023
10.75	16.0245
10.7708	14.9953
10.7917	14.5346
10.8125	13.8325
10.8333	13.4285
10.8542	13.1216
10.875	12.9709
10.8958	12.9368
10.9167	12.6844
10.9375	12.4306
10.9583	12.1709
10.9792	11.7667
11	11.4583
11.0208	11.1559
11.0417	10.9942
11.0625	10.7434
11.0833	10.5936
11.1042	10.4132
11.125	10.0933
11.1458	10.0715
11.1667	10.069
11.1875	9.96587
11.2083	9.81218
11.2292	9.67224
11.25	9.69048
11.2708	10.4349
11.2917	11.4204
11.3125	12.4596
11.3333	13.9549
11.3542	14.1724
11.375	14.6056
11.3958	15.783
11.4167	16.3735
11.4375	17.0635
11.4583	18.7131
11.4792	20.2355
11.5	20.7909
11.5208	21.0749
11.5417	21.2334
11.5625	20.6696
11.5833	20.1313
11.6042	20.4316
11.625	19.7264
11.6458	18.4907
11.6667	17.2553
11.6875	16.9133
11.7083	16.4441
11.7292	15.2239
11.75	14.4935
11.7708	14.0445
11.7917	13.7253
11.8125	13.4822
11.8333	13.2954
11.8542	12.9672
11.875	12.8075
11.8958	12.5276
11.9167	12.3606
11.9375	12.0982
11.9583	11.7252
11.9792	11.4275
12	11.1857
12.0208	10.952
12.0417	10.7161
12.0625	10.4852
12.0833	10.3816
12.1042	10.2565
12.125	10.0848
12.1458	9.98104
12.1667	10.0872
12.1875	10.4788
12.2083	10.7805
12.2292	11.1062
12.25	11.4663
12.2708	12.0094
12.2917	13.3269
12.3125	14.4003
12.3333	15.9281
12.3542	17.7916
12.375	19.3034
12.3958	21.5286
12.4167	23.0015
12.4375	23.9771
12.4583	23.6846
12.4792	22.9814
12.5	24.252
12.5208	24.5587
12.5417	24.0982
12.5625	24.0277
12.5833	24.1231
12.6042	24.3568
12.625	21.4439
12.6458	19.9687
12.6667	19.4725
12.6875	18.7534
12.7083	18.4913
12.7292	18.1273
12.75	18.0181
12.7708	17.8215
12.7917	17.6199
12.8125	17.4928
12.8333	16.9273
12.8542	16.5066
12.875	16.3779
12.8958	16.3883
12.9167	16.2403
12.9375	16.2877
12.9583	16.2902
12.9792	16.2625
13	16.0031
13.0208	15.6858
13.0417	15.3318
13.0625	15.1492
13.0833	14.8342
13.1042	14.5519
13.125	14.17
13.1458	13.826
13.1667	13.3751
13.1875	13.1406
13.2083	12.8364
13.2292	12.6634
13.25	12.5716
13.2708	12.8433
13.2917	14.0112
13.3125	15.0691
13.3333	15.5179
13.3542	17.4373
13.375	18.906
13.3958	20.6833
13.4167	21.6546
13.4375	24.1072
13.4583	25.427
13.4792	26.7549
13.5	26.566
13.5208	25.8932
13.5417	25.7793
13.5625	25.1374
13.5833	24.7981
13.6042	25.3977
13.625	23.7389
13.6458	22.2186
13.6667	21.6519
13.6875	20.8777
13.7083	20.5777
13.7292	19.916
13.75	19.2644
13.7708	18.8369
13.7917	18.4065
13.8125	18.102
13.8333	17.8369
13.8542	17.8604
13.875	18.1104
13.8958	18.0523
13.9167	18.1944
13.9375	17.9586
13.9583	17.8304
13.9792	17.8207
14	17.8693
14.0208	17.6697
14.0417	17.5764
14.0625	17.5675
14.0833	17.5022
14.1042	17.6031
14.125	17.5468
14.1458	17.601
14.1667	17.5545
14.1875	17.4067
14.2083	17.3171
14.2292	17.4034
14.25	17.301
14.2708	17.3925
14.2917	17.7861
14.3125	17.6616
14.3333	17.7947
14.3542	18.2486
14.375	18.6251
14.3958	18.8822
14.4167	19.3064
14.4375	19.4843
14.4583	19.4085
14.4792	22.2084
14.5	23.2137
14.5208	22.5432
14.5417	22.236
14.5625	21.9553
14.5833	21.7403
14.6042	20.1483
14.625	19.0515
14.6458	18.5558
14.6667	18.0478
14.6875	17.579
14.7083	16.8549
14.7292	15.9256
14.75	14.7331
14.7708	13.8426
14.7917	13.3346
14.8125	12.8627
14.8333	12.3536
14.8542	11.8311
14.875	11.4389
14.8958	11.0101
14.9167	10.6997
14.9375	10.4511
14.9583	10.4801
14.9792	10.8151
15	10.8925
15.0208	10.8322
15.0417	10.8866
15.0625	10.9566
15.0833	11.0135
15.1042	11.1691
15.125	11.1642
15.1458	11.2478
15.1667	11.144
15.1875	10.8178
15.2083	10.5515
15.2292	10.4275
15.25	10.2163
15.2708	9.98004
15.2917	10.8348
15.3125	12.4841
15.3333	14.3758
15.3542	15.9437
15.375	18.0956
15.3958	18.8288
15.4167	20.6787
15.4375	20.1083
15.4583	20.453
15.4792	19.9365
15.5	19.7224
15.5208	19.9787
15.5417	20.0434
15.5625	19.4055
15.5833	19.3225
15.6042	18.7166
15.625	18.5448
15.6458	18.9827
15.6667	18.4787
15.6875	17.3455
15.7083	16.4749
15.7292	15.1153
15.75	13.5941
15.7708	12.6118
15.7917	12.03
15.8125	11.449
15.8333	11.1001
15.8542	10.6167
15.875	10.1409
15.8958	10.0935
15.9167	10.5495
15.9375	10.9139
15.9583	11.4156
15.9792	11.5027
16	11.0053
16.0208	10.4068
16.0417	9.93611
16.0625	9.61289
16.0833	9.4005
16.1042	9.42333
16.125	9.42833
16.1458	9.50241
16.1667	9.75251
16.1875	10.0786
16.2083	10.2198
16.2292	10.4199
16.25	10.6831
16.2708	10.9392
16.2917	11.228
16.3125	11.9322
16.3333	12.6731
16.3542	14.0455
16.375	15.4796
16.3958	18.2148
16.4167	20.3175
16.4375	20.3766
16.4583	21.911
16.4792	22.6816
16.5	20.3994
16.5208	20.2291
16.5417	18.8487
16.5625	17.6494
16.5833	16.2236
16.6042	14.5299
16.625	14.5638
16.6458	15.3083
16.6667	15.3378
16.6875	15.193
16.7083	13.9703
16.7292	12.9224
16.75	11.8519
16.7708	11.4229
16.7917	11.0213
16.8125	10.8977
16.8333	10.8102
16.8542	10.5734
16.875	10.2772
16.8958	10.0442
16.9167	9.76778
16.9375	9.3934
16.9583	9.29857
16.9792	9.6891
17	10.0683
17.0208	10.3665
17.0417	10.6821
17.0625	10.4952
17.0833	10.4889
17.1042	10.6831
17.125	10.7329
17.1458	10.9905
17.1667	11.0782
17.1875	11.1427
17.2083	11.1786
17.2292	11.1583
17.25	11.0431
17.2708	11.2489
17.2917	11.5928
17.3125	12.3142
17.3333	13.8942
17.3542	15.6955
17.375	16.0284
17.3958	16.4674
17.4167	17.0036
17.4375	18.3521
17.4583	18.9178
17.4792	19.3595
17.5	18.6267
17.5208	18.5231
17.5417	18.5344
17.5625	18.4209
17.5833	19.0271
17.6042	18.6889
17.625	18.5935
17.6458	18.5593
17.6667	17.135
17.6875	15.9331
17.7083	15.5698
17.7292	14.1209
17.75	12.8457
17.7708	12.0484
17.7917	11.3693
17.8125	10.9564
17.8333	10.5919
17.8542	10.49
17.875	10.1545
17.8958	9.78917
17.9167	9.38598
17.9375	9.13775
17.9583	8.95814
17.9792	8.69933
18	8.27529
18.0208	8.03988
18.0417	8.09973
18.0625	8.17283
18.0833	7.86396
18.1042	7.87199
18.125	7.97487
18.1458	7.96099
18.1667	7.8674
18.1875	7.83873
18.2083	7.75035
18.2292	7.5271
18.25	7.41481
18.2708	7.38002
18.2917	8.3423
18.3125	10.2064
18.3333	12.3481
18.3542	14.3573
18.375	16.5255
18.3958	18.7377
18.4167	20.0194
18.4375	21.0503
18.4583	21.8917
18.4792	23.0215
18.5	21.3106
18.5208	20.4176
18.5417	19.9811
18.5625	20.5528
18.5833	20.8977
18.6042	20.9499
18.625	19.8525
18.6458	19.9067
18.6667	18.7551
18.6875	17.287
18.7083	16.3765
18.7292	15.3842
18.75	14.6918
18.7708	13.8987
18.7917	13.5445
18.8125	13.4004
18.8333	12.8436
18.8542	12.8646
18.875	12.6594
18.8958	12.5494
18.9167	12.3594
18.9375	12.0588
18.9583	11.8594
18.9792	11.5967
19	10.9725
19.0208	10.5306
19.0417	10.3583
19.0625	10.769
19.0833	11.5821
19.1042	11.8767
19.125	12.031
19.1458	12.2882
19.1667	12.0862
19.1875	12.1042
19.2083	12.2352
19.2292	12.1434
19.25	12.339
19.2708	12.4258
19.2917	13.0089
19.3125	14.1699
19.3333	15.8806
19.3542	17.5123
19.375	18.0898
19.3958	19.8568
19.4167	20.26
19.4375	20.8953
19.4583	19.6503
19.4792	21.5684
19.5	21.1849
19.5208	20.7334
19.5417	19.679
19.5625	18.9267
19.5833	17.0596
19.6042	16.6091
19.625	17.8948
19.6458	16.7139
19.6667	15.8299
19.6875	15.4786
19.7083	15.1641
19.7292	14.8773
19.75	14.7501
19.7708	14.6686
19.7917	14.3248
19.8125	14.0384
19.8333	14.0592
19.8542	13.7312
19.875	13.6557
19.8958	13.9442
19.9167	14.0953
19.9375	14.1064
19.9583	14.0364
19.9792	14.1642
20	14.1385
20.0208	14.0928
20.0417	14.0463
20.0625	13.9718
20.0833	14.0191
20.1042	13.8196
20.125	13.4189
20.1458	13.1417
20.1667	12.7079
20.1875	12.4922
20.2083	12.3014
20.2292	11.8706
20.25	11.7514
20.2708	11.8498
20.2917	12.2949
20.3125	13.8083
20.3333	15.4186
20.3542	16.6951
20.375	17.2957
20.3958	16.9074
20.4167	17.7549
20.4375	17.847
20.4583	17.0063
20.4792	17.8399
20.5	17.6201
20.5208	19.5567
20.5417	18.5902
20.5625	20.0703
20.5833	19.6229
20.6042	17.7364
20.625	16.4729
20.6458	15.2526
20.6667	14.3752
20.6875	13.6028
20.7083	13.0087
20.7292	12.4258
20.75	11.8824
20.7708	11.6488
20.7917	11.5225
20.8125	11.175
20.8333	10.9158
20.8542	11.0528
20.875	11.229
20.8958	11.573
20.9167	11.7651
20.9375	11.8557
20.9583	11.9665
20.9792	11.9925
21	11.9828
21.0208	11.8042
21.0417	11.404
21.0625	11.3093
21.0833	11.2381
21.1042	11.06
21.125	11.1973
21.1458	11.2805
21.1667	11.4891
21.1875	11.7306
21.2083	11.6794
21.2292	11.4032
21.25	11.0129
21.2708	10.9906
21.2917	11.1569
21.3125	13.0404
21.3333	14.9596
21.3542	17.8632
21.375	18.8007
21.3958	16.4191
21.4167	16.7885
21.4375	16.9006
21.4583	19.5941
21.4792	19.8629
21.5	19.4152
21.5208	19.2728
21.5417	19.3464
21.5625	17.6492
21.5833	17.4275
21.6042	16.8128
21.625	16.6166
21.6458	15.4828
21.6667	14.1412
21.6875	13.8151
21.7083	13.1872
21.7292	12.7654
21.75	12.5275
21.7708	12.5919
21.7917	12.5173
21.8125	12.6169
21.8333	12.6465
21.8542	12.6807
21.875	12.9113
21.8958	12.9761
21.9167	13.0043
21.9375	13.0461
21.9583	13.0747
21.9792	13.0015
22	13.135
22.0208	13.1813
22.0417	13.1611
22.0625	13.1549
22.0833	13.1541
22.1042	13.0489
22.125	13.2339
22.1458	13.1505
22.1667	13.0265
22.1875	12.9707
22.2083	13.0215
22.2292	12.9348
22.25	13.0113
22.2708	12.9691
22.2917	13.0682
22.3125	13.3
22.3333	13.8209
22.3542	14.3232
22.375	15.1292
22.3958	17.0667
22.4167	17.3056
22.4375	17.1819
22.4583	17.1964
22.4792	18.7258
22.5	18.9508
22.5208	18.8721
22.5417	18.4037
22.5625	19.047
22.5833	17.6109
22.6042	16.2808
22.625	16.144
22.6458	15.1607
22.6667	14.7251
22.6875	14.297
22.7083	14.0778
22.7292	13.7941
22.75	13.645
22.7708	13.6924
22.7917	13.5691
22.8125	13.4506
22.8333	13.2904
22.8542	13.2442
22.875	13.153
22.8958	13.1363
22.9167	13.1394
22.9375	13.1942
22.9583	12.977
22.9792	12.8694
23	12.7734
23.0208	12.808
23.0417	12.7476
23.0625	12.6778
23.0833	12.7516
23.1042	12.7181
23.125	12.4923
23.1458	12.5187
23.1667	12.4856
23.1875	12.4634
23.2083	12.4385
23.2292	12.4719
23.25	12.3898
23.2708	12.5002
23.2917	12.7945
23.3125	13.4435
23.3333	14.572
23.3542	14.9444
23.375	15.3365
23.3958	16.4648
23.4167	17.092
23.4375	18.8849
23.4583	19.381
23.4792	20.7384
23.5	21.9988
23.5208	19.7379
23.5417	18.2514
23.5625	18.2494
23.5833	17.56
23.6042	18.1406
23.625	16.0205
23.6458	15.9072
23.6667	15.7567
23.6875	15.5387
23.7083	14.513
23.7292	13.92
23.75	13.4627
23.7708	12.5926
23.7917	11.7389
23.8125	11.5873
23.8333	11.3284
23.8542	11.26
23.875	10.845
23.8958	10.495
23.9167	10.2055
23.9375	9.90005
23.9583	10.354
23.9792	10.7255
24	10.9677
24.0208	10.6202
24.0417	10.2985
24.0625	9.72176
24.0833	9.5365
24.1042	9.27104
24.125	8.9988
24.1458	8.8002
24.1667	8.71616
24.1875	8.50084
24.2083	8.49952
24.2292	8.3725
24.25	8.46839
24.2708	8.81078
24.2917	10.0347
24.3125	11.0125
24.3333	15.5983
24.3542	17.3514
24.375	17.7973
24.3958	18.3033
24.4167	17.315
24.4375	20.6318
24.4583	22.6186
24.4792	19.811
24.5	16.5797
24.5208	18.105
24.5417	17.7833
24.5625	17.9898
24.5833	17.0583
24.6042	16.8865
24.625	16.9205
24.6458	16.0392
24.6667	15.5802
24.6875	14.1332
24.7083	12.564
24.7292	11.4723
24.75	11.1546
24.7708	11.0563
24.7917	10.4191
24.8125	10.2761
24.8333	10.5095
24.8542	10.1953
24.875	9.91513
24.8958	9.43632
24.9167	9.43958
24.9375	9.72514
24.9583	9.54609
24.9792	9.16818
25	8.69104
25.0208	8.35536
25.0417	8.35904
25.0625	8.03973
25.0833	7.71153
25.1042	7.35595
25.125	7.27557
25.1458	7.36229
25.1667	7.31499
25.1875	7.47393
25.2083	7.78803
25.2292	8.14554
25.25	8.54181
25.2708	8.74869
25.2917	9.50451
25.3125	11.1743
25.3333	13.4175
25.3542	12.5499
25.375	12.4797
25.3958	13.2085
25.4167	14.7014
25.4375	18.2325
25.4583	22.1948
25.4792	19.3092
25.5	17.3849
25.5208	18.8984
25.5417	18.0308
25.5625	19.0601
25.5833	17.176
25.6042	20.1232
25.625	16.66
25.6458	15.4813
25.6667	15.0305
25.6875	13.4427
25.7083	12.2164
25.7292	11.3262
25.75	11.0609
25.7708	10.325
25.7917	9.81597
25.8125	9.3631
25.8333	9.00518
25.8542	9.5285
25.875	9.48652
25.8958	9.28937
25.9167	9.04625
25.9375	8.64399
25.9583	8.33635
25.9792	7.88149
26	7.59251
26.0208	7.41122
26.0417	7.1205
26.0625	6.82689
26.0833	6.52323
26.1042	6.27318
26.125	6.0971
26.1458	5.92487
26.1667	5.78655
26.1875	5.71468
26.2083	5.88666
26.2292	6.25477
26.25	6.31864
26.2708	6.79382
26.2917	7.62159
26.3125	8.96001
26.3333	10.3116
26.3542	11.6504
26.375	14.5861
26.3958	16.8004
26.4167	19.3746
26.4375	22.5616
26.4583	23.9517
26.4792	22.6927
26.5	21.9228
26.5208	21.4665
26.5417	21.1693
26.5625	19.3032
26.5833	18.3742
26.6042	17.3793
26.625	17.9062
26.6458	16.9222
26.6667	15.8718
26.6875	14.896
26.7083	13.9475
26.7292	13.0536
26.75	12.5453
26.7708	12.1714
26.7917	12.3555
26.8125	11.9719
26.8333	11.4049
26.8542	11.4724
26.875	11.8426
26.8958	11.9906
26.9167	11.9909
26.9375	11.9786
26.9583	12.0011
26.9792	12.0037
27	11.8805
27.0208	11.8832
27.0417	11.7007
27.0625	11.5318
27.0833	11.305
27.1042	11.2312
27.125	10.8017
27.1458	11.0448
27.1667	11.056
27.1875	10.9281
27.2083	10.5759
27.2292	10.2539
27.25	10.3455
27.2708	10.3839
27.2917	10.7643
27.3125	11.8275
27.3333	13.2172
27.3542	14.8584
27.375	18.3868
27.3958	19.0624
27.4167	18.6754
27.4375	18.1578
27.4583	18.4116
27.4792	17.2103
27.5	18.2704
27.5208	18.1533
27.5417	19.0237
27.5625	18.3436
27.5833	17.7586
27.6042	16.2456
27.625	15.2976
27.6458	15.3015
27.6667	14.7104
27.6875	13.7884
27.7083	13.0897
27.7292	12.5334
27.75	11.8315
27.7708	11.1858
27.7917	10.6791
27.8125	10.3901
27.8333	10.1283
27.8542	10.0539
27.875	10.1859
27.8958	10.2209
27.9167	10.2737
27.9375	10.246
27.9583	10.2868
27.9792	10.3422
28	10.1796
28.0208	10.2965
28.0417	9.97916
28.0625	9.88326
28.0833	9.91672
28.1042	9.98254
28.125	10.1528
28.1458	9.99583
28.1667	9.9381
28.1875	9.73248
28.2083	9.65498
28.2292	9.7262
28.25	9.7709
28.2708	9.94241
28.2917	10.2399
28.3125	10.9883
28.3333	11.1674
28.3542	12.6346
28.375	13.9755
28.3958	13.1639
28.4167	12.8877
28.4375	13.4835
28.4583	13.59
28.4792	13.519
28.5	13.5636
28.5208	13.0139
28.5417	12.8758
28.5625	12.6164
28.5833	12.5681
28.6042	15.3676
28.625	15.5486
28.6458	14.4295
28.6667	13.6223
28.6875	12.7721
28.7083	12.0742
28.7292	11.6845
28.75	11.4504
28.7708	11.3156
28.7917	11.3707
28.8125	11.2934
28.8333	11.3394
28.8542	11.2494
28.875	11.258
28.8958	11.3233
28.9167	11.2419
28.9375	11.2953
28.9583	11.2595
28.9792	11.1744
29	11.2972
29.0208	11.2587
29.0417	11.2203
29.0625	11.2213
29.0833	11.1822
29.1042	11.1705
29.125	11.1008
29.1458	11.0466
29.1667	11.1118
29.1875	11.1152
29.2083	11.095
29.2292	11.0945
29.25	11.1122
29.2708	11.097
29.2917	11.4787
29.3125	11.6398
29.3333	12.4308
29.3542	13.8339
29.375	15.7072
29.3958	16.0938
29.4167	16.8063
29.4375	17.339
29.4583	16.556
29.4792	17.1235
29.5	16.0646
29.5208	15.617
29.5417	15.3916
29.5625	16.1269
29.5833	14.4936
29.6042	13.862
29.625	13.9797
29.6458	13.5772
29.6667	13.4344
29.6875	13.1211
29.7083	12.4096
29.7292	11.9509
29.75	11.6741
29.7708	11.6734
29.7917	11.6155
29.8125	11.4475
29.8333	11.327
29.8542	11.2586
29.875	11.3148
29.8958	11.371
29.9167	11.3989
29.9375	11.4252
29.9583	11.3525
29.9792	11.4693
30	11.6234
30.0208	11.6447
30.0417	11.6878
30.0625	11.5814
30.0833	11.4752
30.1042	11.3336
30.125	11.3592
30.1458	11.4784
30.1667	11.6314
30.1875	11.6462
30.2083	11.5945
30.2292	11.5382
30.25	11.596
30.2708	11.5877
30.2917	11.6798
30.3125	12.1634
30.3333	13.0282
30.3542	14.0439
30.375	15.3176
30.3958	17.2997
30.4167	19.181
30.4375	19.536
30.4583	20.8558
30.4792	21.2392
30.5	20.343
30.5208	20.6345
30.5417	20.0429
30.5625	18.4508
30.5833	17.9224
30.6042	17.2839
30.625	16.461
30.6458	16.1213
30.6667	15.4739
30.6875	15.0821
30.7083	14.0424
30.7292	13.4733
30.75	13.3198
30.7708	13.1759
30.7917	13.1549
30.8125	12.9818
30.8333	12.822
30.8542	12.576
30.875	12.7343
30.8958	13.1521
30.9167	13.081
30.9375	12.5298
30.9583	11.9425
30.9792	11.5758
31	11.1953
31.0208	10.6288
31.0417	10.4284
31.0625	10.0871
31.0833	9.82016
31.1042	9.70076
31.125	9.43071
31.1458	9.11271
31.1667	8.78059
31.1875	8.38076
31.2083	7.98608
31.2292	7.89527
31.25	8.11894
31.2708	8.60187
31.2917	9.99064
31.3125	11.8605
31.3333	12.5082
31.3542	13.4282
31.375	14.3844
31.3958	15.2434
31.4167	15.7385
31.4375	16.6441
31.4583	18.2503
31.4792	18.0096
31.5	18.9369
31.5208	18.9592
31.5417	20.3861
31.5625	20.9249
31.5833	20.8615
31.6042	19.8346
31.625	19.347
31.6458	18.1845
31.6667	17.4175
31.6875	16.5557
31.7083	15.634
31.7292	15.0742
31.75	14.6554
31.7708	14.1146
31.7917	13.8479
31.8125	13.2779
31.8333	12.8926
31.8542	12.6388
31.875	12.6023
31.8958	12.4298
31.9167	12.3033
31.9375	12.1202
31.9583	11.9971
31.9792	11.7453
32	11.4975
32.0208	11.5323
32.0417	11.5537
32.0625	11.4201
32.0833	11.4177
32.1042	11.3478
32.125	11.2735
32.1458	11.3844
32.1667	11.5816
32.1875	11.1888
32.2083	10.8122
32.2292	10.5845
32.25	10.2527
32.2708	10.2316
32.2917	10.6071
32.3125	12.0663
32.3333	14.2602
32.3542	15.7698
32.375	17.0223
32.3958	19.5294
32.4167	19.9887
32.4375	21.1344
32.4583	21.7827
32.4792	21.7416
32.5	19.8775
32.5208	19.0134
32.5417	18.5739
32.5625	19.6075
32.5833	20.5973
32.6042	20.6936
32.625	18.8959
32.6458	17.7992
32.6667	16.8923
32.6875	15.5867
32.7083	14.2678
32.7292	13.1737
32.75	12.3522
32.7708	11.9491
32.7917	11.671
32.8125	11.6877
32.8333	11.7043
32.8542	11.5775
32.875	11.5674
32.8958	11.1459
32.9167	10.8289
32.9375	10.4515
32.9583	10.0035
32.9792	9.80487
33	9.61888
33.0208	9.47426
33.0417	9.30987
33.0625	9.16482
33.0833	9.01189
33.1042	8.73422
33.125	8.79885
33.1458	8.79182
33.1667	8.79265
33.1875	8.81816
33.2083	9.05477
33.2292	9.13742
33.25	9.30724
33.2708	9.53924
33.2917	9.83789
33.3125	10.5189
33.3333	10.9245
33.3542	11.1031
33.375	11.4217
33.3958	12.3175
33.4167	13.3436
33.4375	13.9233
33.4583	15.7949
33.4792	15.9857
33.5	15.4471
33.5208	14.9778
33.5417	14.429
33.5625	14.0756
33.5833	15.5431
33.6042	14.7046
33.625	14.1502
33.6458	13.9465
33.6667	12.8625
33.6875	11.9722
33.7083	11.0234
33.7292	10.3756
33.75	10.1283
33.7708	10.0522
33.7917	10.0114
33.8125	9.78269
33.8333	9.48441
33.8542	9.13514
33.875	8.90335
33.8958	8.5502
33.9167	8.08597
33.9375	7.82637
33.9583	7.51055
33.9792	7.21868
34	7.10208
34.0208	7.29542
34.0417	7.54627
34.0625	7.74045
34.0833	8.0255
34.1042	8.28704
34.125	8.42011
34.1458	8.79516
34.1667	9.27006
34.1875	9.67179
34.2083	9.8682
34.2292	9.97614
34.25	10.0046
34.2708	10.0262
34.2917	10.2383
34.3125	10.6702
34.3333	11.6135
34.3542	12.2449
34.375	13.0566
34.3958	14.8505
34.4167	15.4551
34.4375	18.3118
34.4583	17.7484
34.4792	17.8796
34.5	18.0111
34.5208	17.6278
34.5417	17.2326
34.5625	16.1573
34.5833	15.7258
34.6042	15.3732
34.625	14.7461
34.6458	14.3329
34.6667	14.0144
34.6875	13.308
34.7083	12.6008
34.7292	12.2198
34.75	12.0348
34.7708	11.8182
34.7917	11.6244
34.8125	11.629
34.8333	11.5979
34.8542	11.5875
34.875	11.0569
34.8958	10.7208
34.9167	10.458
34.9375	10.3584
34.9583	10.2042
34.9792	10.0931
35	10.2472
35.0208	10.2651
35.0417	10.4856
35.0625	10.826
35.0833	10.8324
35.1042	10.7366
35.125	10.7232
35.1458	10.2923
35.1667	9.95531
35.1875	9.64568
35.2083	9.41974
35.2292	9.50143
35.25	9.80147
35.2708	9.88946
35.2917	10.4013
35.3125	11.3452
35.3333	12.2081
35.3542	13.3794
35.375	14.7465
35.3958	16.3013
35.4167	17.0152
35.4375	17.2174
35.4583	17.1076
35.4792	16.4151
35.5	16.4179
35.5208	16.6917
35.5417	16.3289
35.5625	17.1586
35.5833	17.0975
35.6042	17.011
35.625	15.1592
35.6458	14.2813
35.6667	13.5141
35.6875	12.3725
35.7083	11.5498
35.7292	10.9936
35.75	11.1528
35.7708	11.1791
35.7917	11.2192
35.8125	10.8024
35.8333	10.3104
35.8542	10.4199
35.875	10.6495
35.8958	10.6407
35.9167	10.7904
35.9375	10.8792
35.9583	10.8215
35.9792	10.9368
36	10.8657
36.0208	10.5572
36.0417	10.2854
36.0625	9.98224
36.0833	10.2431
36.1042	10.459
36.125	10.6125
36.1458	10.1433
36.1667	9.71159
36.1875	9.38949
36.2083	9.07812
36.2292	9.46083
36.25	9.50114
36.2708	9.23982
36.2917	9.98519
36.3125	11.2685
36.3333	12.309
36.3542	14.7758
36.375	18.5404
36.3958	19.6591
36.4167	18.7102
36.4375	16.5964
36.4583	16.9952
36.4792	17.4128
36.5	17.4507
36.5208	17.3759
36.5417	15.7431
36.5625	15.2246
36.5833	15.4386
36.6042	16.9642
36.625	16.2648
36.6458	14.7052
36.6667	14.7485
36.7292	12.321
36.75	10.5539
36.7708	10.0066
36.7917	10.2904
36.8125	10.5039
36.8333	10.481
36.8542	10.1347
36.875	9.95091
36.8958	9.92134
36.9167	9.99091
36.9375	10.0103
36.9583	9.41414
36.9792	8.94146
37	8.5902
37.0208	8.46924
37.0417	8.68464
37.0625	8.98314
37.0833	9.15121
37.1042	9.15481
37.125	9.04228
37.1458	8.95518
37.1667	8.92767
37.1875	8.50103
37.2083	8.59737
37.2292	8.47696
37.25	8.44202
37.2708	8.15777
37.2917	8.72949
37.3125	10.058
37.3333	10.9551
37.3542	14.0664
37.375	13.6563
37.3958	19.2948
37.4167	16.3178
37.4375	18.5069
37.4583	16.2707
37.4792	18.2831
37.5	16.4616
37.5208	16.1328
37.5417	16.7896
37.5625	17.2027
37.5833	15.9891
37.6042	14.9984
37.625	15.3937
37.6458	14.2121
37.6667	13.3526
37.6875	12.5548
37.7083	11.984
37.7292	11.2747
37.75	10.6482
37.7708	9.94672
37.7917	9.49
37.8125	9.62646
37.8333	9.84633
37.8542	9.9744
37.875	9.9074
37.8958	9.57517
37.9167	9.55947
37.9375	9.47805
37.9583	9.36508
37.9792	9.28358
38	9.30528
38.0208	9.23973
38.0417	9.1633
38.0625	9.16641
38.0833	9.1009
38.1042	9.2197
38.125	9.25363
38.1458	9.26999
38.1667	9.27887
38.1875	9.28407
38.2083	9.26164
38.2292	9.25195
38.25	9.03507
38.2708	8.92698
38.2917	9.26342
38.3125	9.66597
38.3333	10.1151
38.3542	11.4433
38.375	12.865
38.3958	15.0646
38.4167	18.6802
38.4375	21.3297
38.4583	20.9215
38.4792	18.4169
38.5	16.3175
38.5208	16.0476
38.5417	14.5636
38.5625	15.1139
38.5833	14.9916
38.6042	15.217
38.625	14.0916
38.6458	13.1258
38.6667	12.1362
38.6875	11.1267
38.7083	10.1829
38.7292	9.30334
38.75	8.40754
38.7708	7.7266
38.7917	7.84008
38.8125	8.09072
38.8333	8.78882
38.8542	8.75527
38.875	8.14258
38.8958	7.676
38.9167	7.38603
38.9375	7.16065
38.9583	7.31447
38.9792	7.70474
39	7.72945
39.0208	7.66193
39.0417	7.56902
39.0625	7.65953
39.0833	8.10783
39.1042	8.39861
39.125	8.32383
39.1458	8.20519
39.1667	8.08392
39.1875	8.21702
39.2083	8.46169
39.2292	8.36676
39.25	8.38375
39.2708	8.5533
39.2917	8.7757
39.3125	9.43948
39.3333	10.1283
39.3542	11.9501
39.375	13.4559
39.3958	14.9367
39.4167	16.2411
39.4375	17.2903
39.4583	18.0487
39.4792	18.362
39.5	17.4325
39.5208	17.6564
39.5417	16.4482
39.5625	15.9359
39.5833	15.8795
39.6042	15.8822
39.625	15.5289
39.6458	14.3163
39.6667	13.2019
39.6875	12.421
39.7083	11.6737
39.7292	11.1741
39.75	10.8284
39.7708	10.7406
39.7917	10.4747
39.8125	10.3343
39.8333	10.1518
39.8542	9.86791
39.875	9.71696
39.8958	9.78023
39.9167	9.58573
39.9375	9.08263
39.9583	8.34499
39.9792	7.66018
40	7.27494
40.0208	6.88972
40.0417	6.59129
40.0625	6.3414
40.0833	6.25298
40.1042	6.376
40.125	6.36019
40.1458	6.36709
40.1667	6.27101
40.1875	6.37136
40.2083	6.08165
40.2292	5.80386
40.25	5.55234
40.2708	5.32878
40.2917	5.88186
40.3125	10.1236
40.3333	13.4615
40.3542	16.9869
40.375	19.3638
40.3958	22.3786
40.4167	24.1451
40.4375	26.0236
40.4583	25.3989
40.4792	22.0428
40.5	20.2543
40.5208	19.2194
40.5417	17.3163
40.5625	17.1315
40.5833	17.0616
40.6042	16.5085
40.625	14.9505
40.6458	13.2538
40.6667	12.4989
40.6875	11.5639
40.7083	10.6783
40.7292	9.70699
40.75	9.09175
40.7708	8.41778
40.7917	7.87205
40.8125	7.61913
40.8333	7.74909
40.8542	7.94678
40.875	8.0252
40.8958	7.66103
40.9167	7.11093
40.9375	6.94902
40.9583	6.64486
40.9792	6.74819
41	7.18419
41.0208	7.44646
41.0417	7.72126
41.0625	8.06502
41.0833	8.26226
41.1042	8.4473
41.125	8.60835
41.1458	8.60188
41.1667	8.47992
41.1875	8.21015
41.2083	7.89541
41.2292	7.70018
41.25	7.43441
41.2708	7.69747
41.2917	8.48183
41.3125	9.4576
41.3333	10.4076
41.3542	11.2672
41.375	11.6578
41.3958	12.4682
41.4167	12.9504
41.4375	13.3187
41.4583	13.8267
41.4792	14.0753
41.5	14.0101
41.5208	15.1379
41.5417	16.5825
41.5625	16.9958
41.5833	16.7428
41.6042	16.5064
41.625	15.387
41.6458	14.8727
41.6667	14.3943
41.6875	13.7327
41.7083	13.2191
41.7292	12.369
41.75	11.9958
41.7708	11.6229
41.7917	11.1233
41.8125	10.7448
41.8333	10.3982
41.8542	10.0216
41.875	9.74503
41.8958	9.57097
41.9167	9.3637
41.9375	9.12513
41.9583	9.12844
41.9792	9.36522
42	9.24811
42.0208	9.14349
42.0417	9.60666
[truncated: 6,801 more rows]

## Sheet: North_Sweden_16
Days_from_sowing	Temperature_oC
0	18.535
0.0652778	18.405
0.106944	18.275
0.148611	18.15
0.190278	18.075
0.231944	18.4
0.273611	14.74
0.315278	20.255
0.356944	22.405
0.398611	24.83
0.440278	25.555
0.481944	25.54
0.523611	25.93
0.565278	25.6
0.606944	25.365
0.648611	25.38
0.690278	25.485
0.731944	25.53
0.773611	25.3
0.815278	24.935
0.856944	24.56
0.898611	24.16
0.940278	22.95
0.981944	22.1
1.02361	21.52
1.06528	21.105
1.10694	20.805
1.14861	20.595
1.19028	20.43
1.23194	20.36
1.27361	21.25
1.31528	22.17
1.35694	23.43
1.39861	24.475
1.44028	25.205
1.48194	25.895
1.52361	27.07
1.56528	27.115
1.60694	27.37
1.64861	27.445
1.69028	27.285
1.73194	25.985
1.77361	19.51
1.81528	17.195
1.85694	16.185
1.89861	15.55
1.94028	14.805
1.98194	14.26
2.02361	13.74
2.06528	13.395
2.10694	12.98
2.14861	12.43
2.19028	11.72
2.23194	11.205
2.27361	11.47
2.31528	12.91
2.35694	14.63
2.39861	17.37
2.44028	17.44
2.48194	17.87
2.52361	17.61
2.56528	17.695
2.60694	17.7
2.64861	17.44
2.69028	16.81
2.73194	16.5
2.77361	16.04
2.81528	15.27
2.85694	14.495
2.89861	13.55
2.94028	12.84
2.98194	12.435
3.02361	12.075
3.06528	12.015
3.10694	11.89
3.14861	12
3.19028	12.195
3.23194	12.335
3.27361	12.625
3.31528	13.435
3.35694	16.105
3.39861	16.295
3.44028	17.225
3.48194	18.195
3.52361	18.415
3.56528	18.115
3.60694	17.555
3.64861	18.05
3.69028	18.08
3.73194	23.7
3.77361	22.525
3.81528	19.85
3.85694	14.97
3.89861	13.265
3.94028	12.29
3.98194	11.74
4.02361	12.05
4.06528	11.955
4.10694	11.505
4.14861	11.095
4.19028	10.855
4.23194	10.59
4.27361	11.135
4.31528	12.675
4.35694	16.78
4.39861	18.975
4.44028	18.345
4.48194	20.12
4.52361	20.16
4.56528	20.195
4.60694	19.29
4.64861	20.275
4.69028	19.72
4.73194	25.295
4.77361	24.72
4.81528	22.255
4.85694	16.665
4.89861	14.05
4.94028	13.03
4.98194	11.89
5.02361	11.25
5.06528	12.46
5.10694	13.29
5.14861	12.63
5.19028	12.225
5.23194	12.82
5.27361	13.345
5.31528	14.095
5.35694	13.785
5.39861	13.765
5.44028	14.3
5.48194	15.59
5.52361	16.51
5.56528	16.28
5.60694	15.655
5.64861	15.79
5.69028	15.625
5.73194	15.405
5.77361	15.215
5.81528	14.835
5.85694	14.42
5.89861	14.11
5.94028	14.015
5.98194	13.895
6.02361	13.855
6.06528	13.825
6.10694	13.785
6.14861	13.745
6.19028	13.67
6.23194	13.775
6.27361	14.195
6.31528	14.975
6.35694	16.655
6.39861	20.615
6.44028	22.005
6.48194	24.055
6.52361	25.87
6.56528	25.205
6.60694	20.855
6.64861	21.415
6.69028	20.535
6.73194	18.485
6.77361	16.665
6.81528	15.34
6.85694	15.045
6.89861	14.76
6.94028	14.6
6.98194	14.38
7.02361	14.585
7.06528	14.7
7.10694	14.7
7.14861	14.66
7.19028	14.445
7.23194	14.34
7.27361	14.615
7.31528	14.785
7.35694	15.125
7.39861	15.405
7.44028	16.045
7.48194	15.485
7.52361	14.935
7.56528	15.87
7.60694	15.89
7.64861	16.06
7.69028	16.41
7.73194	16.68
7.77361	16.38
7.81528	15.725
7.85694	14.955
7.89861	14.66
7.94028	14.565
7.98194	14.325
8.02361	14.24
8.06528	14.265
8.10694	14.215
8.14861	14.215
8.19028	14.09
8.23194	14.015
8.27361	14.48
8.31528	15.565
8.35694	17.815
8.39861	19.16
8.44028	19.545
8.48194	22.67
8.52361	19.9
8.56528	20.605
8.60694	20.31
8.64861	19.615
8.69028	19.555
8.73194	19.575
8.77361	23.735
8.81528	17.14
8.85694	14.85
8.89861	14.01
8.94028	13.34
8.98194	12.84
9.02361	12.435
9.06528	12.535
9.10694	12.83
9.14861	12.805
9.19028	12.855
9.23194	12.995
9.27361	13.085
9.31528	13.375
9.35694	13.96
9.39861	14.315
9.44028	14.855
9.48194	16.155
9.52361	17.615
9.56528	18.055
9.60694	19.11
9.64861	17.965
9.69028	18.295
9.73194	17.31
9.77361	16.665
9.81528	16.08
9.85694	15.075
9.89861	15.01
9.94028	14.725
9.98194	14.2
10.0236	14.08
10.0653	14.01
10.1069	14.01
10.1486	14.03
10.1903	13.985
10.2319	13.745
10.2736	13.795
10.3153	14.345
10.3569	15.52
10.3986	19.135
10.4403	20.795
10.4819	23.205
10.5236	20.61
10.5653	20.85
10.6069	21.79
10.6486	19.475
10.6903	19.71
10.7319	25.785
10.7736	19.63
10.8153	18.9
10.8569	16.16
10.8986	14.44
10.9403	13.82
10.9819	13.125
11.0236	12.405
11.0653	12.07
11.1069	11.43
11.1486	11.205
11.1903	10.79
11.2319	10.83
11.2736	11.305
11.3153	13.06
11.3569	16.57
11.3986	19.8
11.4403	20.935
11.4819	21.23
11.5236	20.57
11.5653	18.36
11.6069	18.035
11.6486	18.31
11.6903	18.61
11.7319	23.35
11.7736	23.07
11.8153	17.515
11.8569	14.13
11.8986	12.495
11.9403	11.67
11.9819	11.175
12.0236	11.415
12.0653	11.14
12.1069	10.34
12.1486	9.75
12.1903	9.12
12.2319	8.87
12.2736	9.23
12.3153	11.175
12.3569	12.815
12.3986	14.87
12.4403	18.12
12.4819	28.295
12.5236	27.57
12.5653	22.95
12.6069	22.21
12.6486	20.49
12.6903	18.335
12.7319	18.17
12.7736	16.25
12.8153	15.19
12.8569	14.49
12.8986	14.045
12.9403	13.79
12.9819	13.315
13.0236	13.39
13.0653	13.3
13.1069	13.015
13.1486	12.865
13.1903	11.97
13.2319	11.195
13.2736	11.18
13.3153	12.03
13.3569	12.91
13.3986	15.725
13.4403	19.715
13.4819	22.28
13.5236	24.16
13.5653	25.725
13.6069	26.295
13.6486	29.34
13.6903	29.855
13.7319	26.095
13.7736	20.695
13.8153	17.67
13.8569	15.835
13.8986	15.06
13.9403	14.49
13.9819	13.91
14.0236	12.285
14.0653	10.83
14.1069	10.145
14.1486	10.68
14.1903	10.09
14.2319	9.96
14.2736	11.04
14.3153	12.03
14.3569	13.74
14.3986	15.475
14.4403	18.485
14.4819	20.77
14.5236	20.66
14.5653	20.24
14.6069	19.505
14.6486	18.44
14.6903	16.455
14.7319	15.57
14.7736	15.09
14.8153	14.75
14.8569	14.7
14.8986	14.875
14.9403	14.855
14.9819	14.84
15.0236	14.85
15.0653	14.175
15.1069	13.52
15.1486	12.61
15.1903	11.805
15.2319	11.14
15.2736	11.25
15.3153	11.735
15.3569	11.68
15.3986	14.26
15.4403	15.37
15.4819	15.09
15.5236	15.12
15.5653	18.085
15.6069	21.305
15.6486	18.87
15.6903	18.71
15.7319	19.3
15.7736	16.065
15.8153	13.115
15.8569	10.515
15.8986	9.365
15.9403	8.535
15.9819	8.005
16.0236	7.205
16.0653	6.63
16.1069	6.26
16.1486	6.05
16.1903	6.38
16.2319	6.765
16.2736	6.33
16.3153	6.51
16.3569	6.99
16.3986	8.35
16.4403	15.61
16.4819	22.085
16.5236	23.91
16.5653	24.565
16.6069	23.4
16.6486	18.875
16.6903	18.285
16.7319	19.26
16.7736	14.86
16.8153	11.94
16.8569	9.865
16.8986	9.69
16.9403	9.235
16.9819	9.125
17.0236	8.8
17.0653	8.385
17.1069	8.375
17.1486	8.085
17.1903	7.965
17.2319	7.86
17.2736	8.655
17.3153	9.825
17.3569	11.54
17.3986	13.805
17.4403	16.11
17.4819	17.805
17.5236	17.65
17.5653	18.13
17.6069	20.68
17.6486	18.04
17.6903	16.785
17.7319	14.95
17.7736	14.25
17.8153	12.92
17.8569	10.3
17.8986	8.355
17.9403	7.3
17.9819	6.55
18.0236	6.015
18.0653	5.74
18.1069	5.555
18.1486	5.495
18.1903	5.56
18.2319	5.57
18.2736	5.965
18.3153	6.56
18.3569	7.54
18.3986	10.505
18.4403	14.225
18.4819	16.815
18.5236	23.53
18.5653	24.495
18.6069	29.07
18.6486	23.87
18.6903	19
18.7319	20.395
18.7736	18.585
18.8153	13.91
18.8569	11.055
18.8986	9.605
18.9403	8.895
18.9819	8.92
19.0236	7.88
19.0653	7.325
19.1069	7.78
19.1486	8.635
19.1903	8.16
19.2319	9.02
19.2736	9.465
19.3153	11.47
19.3569	12.61
19.3986	13.98
19.4403	17.915
19.4819	25.28
19.5236	29.41
19.5653	28.43
19.6069	26.34
19.6486	20.53
19.6903	17.28
19.7319	17.535
19.7736	15.205
19.8153	14.165
19.8569	13.785
19.8986	13.865
19.9403	13.92
19.9819	14.12
20.0236	14.14
20.0653	14.055
20.1069	13.73
20.1486	13.515
20.1903	13.44
20.2319	13.31
20.2736	13.465
20.3153	14.045
20.3569	15.69
20.3986	16.4
20.4403	16.805
20.4819	17.58
20.5236	19.995
20.5653	28.525
20.6069	25.945
20.6486	22.06
20.6903	22.7
20.7319	23.265
20.7736	19.855
20.8153	15.295
20.8569	13.45
20.8986	12.395
20.9403	11.06
20.9819	10.735
21.0236	11.325
21.0653	11.585
21.1069	11.445
21.1486	11.13
21.1903	11.11
21.2319	10.715
21.2736	10.435
21.3153	9.59
21.3569	10.32
21.3986	11.14
21.4403	16.27
21.4819	20.51
21.5236	22.055
21.5653	24.405
21.6069	25.87
21.6486	24.22
21.6903	24.955
21.7319	22.975
21.7736	19.04
21.8153	14.41
21.8569	13.75
21.8986	12.43
21.9403	11.495
21.9819	11.545
22.0236	11.16
22.0653	9.79
22.1069	8.935
22.1486	7.895
22.1903	7.61
22.2319	7.945
22.2736	10.275
22.3153	12.095
22.3569	14.06
22.3986	15.27
22.4403	17.405
22.4819	23.925
22.5236	24.18
22.5653	21.44
22.6069	22.865
22.6486	19.43
22.6903	16.765
22.7319	15.605
22.7736	14.86
22.8153	14.215
22.8569	13.84
22.8986	13.765
22.9403	13.7
22.9819	13.7
23.0236	13.585
23.0653	13.32
23.1069	13.13
23.1486	13.06
23.1903	13.065
23.2319	13.015
23.2736	13.035
23.3153	13.36
23.3569	13.655
23.3986	14.055
23.4403	14.58
23.4819	16.075
23.5236	18.52
23.5653	18.215
23.6069	16.645
23.6486	16.865
23.6903	17.5
23.7319	17.035
23.7736	15.42
23.8153	14.205
23.8569	13.515
23.8986	13.14
23.9403	12.885
23.9819	12.075
24.0236	10.88
24.0653	10.115
24.1069	9.615
24.1486	8.995
24.1903	9.6
24.2319	9.945
24.2736	10.125
24.3153	10.115
24.3569	8.99
24.3986	9.05
24.4403	15.515
24.4819	22.395
24.5236	25.6
24.5653	27.39
24.6069	27.03
24.6486	26.175
24.6903	24.765
24.7319	21.315
24.7736	15.91
24.8153	11.93
24.8569	10.095
24.8986	9.385
24.9403	8.635
24.9819	8.215
25.0236	7.995
25.0653	7.6
25.1069	7.515
25.1486	7.47
25.1903	7.42
25.2319	7.36
25.2736	8.11
25.3153	9.39
25.3569	11.63
25.3986	13.7
25.4403	15.32
25.4819	15.105
25.5236	15.42
25.5653	15.015
25.6069	15.54
25.6486	14.995
25.6903	15.855
25.7319	14.655
25.7736	13.295
25.8153	12.35
25.8569	11.915
25.8986	10.805
25.9403	10.925
25.9819	10.35
26.0236	10.025
26.0653	9.83
26.1069	10.58
26.1486	10.255
26.1903	9.585
26.2319	8.905
26.2736	9.29
26.3153	10.36
26.3569	11.68
26.3986	12.555
26.4403	15.155
26.4819	20.16
26.5236	21.97
26.5653	21.225
26.6069	25.715
26.6486	26.27
26.6903	24.2
26.7319	21.84
26.7736	18.21
26.8153	14.58
26.8569	13.51
26.8986	12.775
26.9403	11.76
26.9819	10.92
27.0236	9.905
27.0653	9.49
27.1069	9.045
27.1486	8.26
27.1903	7.71
27.2319	7.21
27.2736	7.415
27.3153	7.85
27.3569	8.585
27.3986	9.605
27.4403	14.5
27.4819	22.005
27.5236	26.03
27.5653	28.045
27.6069	28.79
27.6486	28.36
27.6903	27.005
27.7319	21.705
27.7736	17.53
27.8153	13.72
27.8569	11.68
27.8986	10.67
27.9403	10.21
27.9819	9.18
28.0236	8.465
28.0653	8.025
28.1069	7.99
28.1486	7.945
28.1903	9.145
28.2319	10.07
28.2736	10.815
28.3153	11.28
28.3569	11.815
28.3986	13.92
28.4403	13.84
28.4819	14.54
28.5236	14.645
28.5653	14.69
28.6069	14.67
28.6486	14.185
28.6903	14.165
28.7319	13.75
28.7736	13.42
28.8153	13.19
28.8569	13.065
28.8986	12.995
28.9403	12.97
28.9819	12.755
29.0236	12.67
29.0653	12.355
29.1069	12.34
29.1486	11.99
29.1903	12.08
29.2319	12.1
29.2736	12.27
29.3153	12.705
29.3569	13.915
29.3986	14.88
29.4403	15.855
29.4819	16.39
29.5236	16.855
29.5653	16.935
29.6069	16.485
29.6486	16.855
29.6903	16.57
29.7319	15.525
29.7736	14.62
29.8153	13.86
29.8569	13.46
29.8986	13.23
29.9403	13.085
29.9819	12.97
30.0236	12.91
30.0653	12.85
30.1069	12.825
30.1486	12.815
30.1903	12.805
30.2319	12.795
30.2736	12.9
30.3153	13.42
30.3569	14.09
30.3986	15.065
30.4403	16.005
30.4819	19.305
30.5236	18.415
30.5653	15.56
30.6069	15.29
30.6486	20.545
30.6903	21.67
30.7319	19.015
30.7736	15.76
30.8153	12.405
30.8569	11.26
30.8986	10.49
30.9403	9.705
30.9819	9.38
31.0236	9.12
31.0653	9.02
31.1069	8.795
31.1486	8.575
31.1903	7.955
31.2319	7.455
31.2736	7.55
31.3153	8.81
31.3569	10.42
31.3986	11.49
31.4403	14.17
31.4819	20.605
31.5236	23.845
31.5653	26.075
31.6069	27.175
31.6486	27.29
31.6903	25.025
31.7319	21.935
31.7736	17.54
31.8153	13.77
31.8569	11.87
31.8986	10.72
31.9403	9.835
31.9819	9.25
32.0236	8.715
32.0653	8.365
32.1069	8.01
32.1486	7.795
32.1903	7.525
32.2319	7.145
32.2736	7.165
32.3153	7.72
32.3569	8.405
32.3986	9.515
32.4403	14.8
32.4819	21.95
32.5236	24.905
32.5653	27.53
32.6069	28.5
32.6486	27.715
32.6903	25.565
32.7319	22.605
32.7736	17.4
32.8153	13.315
32.8569	11.5
32.8986	10.435
32.9403	9.555
32.9819	8.9
33.0236	8.32
33.0653	8.245
33.1069	10.005
33.1486	10.335
33.1903	10.18
33.2319	10.12
33.2736	10.405
33.3153	11.005
33.3569	12.275
33.3986	13.89
33.4403	16.1
33.4819	19.415
33.5236	24.265
33.5653	27.275
33.6069	27.855
33.6486	27.105
33.6903	22.995
33.7319	17.77
33.7736	15.75
33.8153	14.85
33.8569	14.535
33.8986	14.095
33.9403	12.56
33.9819	11.19
34.0236	11.02
34.0653	11.52
34.1069	12.135
34.1486	12.37
34.1903	12.06
34.2319	11.485
34.2736	10.83
34.3153	10.795
34.3569	10.485
34.3986	10.985
34.4403	15.715
34.4819	23.02
34.5236	26.825
34.5653	29.135
34.6069	29.385
34.6486	28.09
34.6903	25.5
34.7319	21.245
34.7736	16.605
34.8153	12.805
34.8569	10.845
34.8986	9.615
34.9403	8.76
34.9819	8.06
35.0236	7.485
35.0653	6.915
35.1069	6.48
35.1486	6.165
35.1903	5.915
35.2319	5.645
35.2736	5.605
35.3153	6.12
35.3569	6.775
35.3986	7.96
35.4403	11.615
35.4819	15.955
35.5236	18.44
35.5653	19.985
35.6069	21.595
35.6486	22.405
35.6903	21.81
35.7319	17.585
35.7736	13.415
35.8153	11.9
35.8569	11.355
35.8986	9.72
35.9403	7.845
35.9819	7.41
36.0236	6.315
36.0653	5.645
36.1069	5.17
36.1486	4.695
36.1903	4.34
36.2319	4.055
36.2736	3.98
36.3153	5.765
36.3569	7.095
36.3986	6.81
36.4403	12.105
36.4819	19.2
36.5236	22.255
36.5653	17.52
36.6069	22.215
36.6486	21.615
36.6903	17.095
36.7319	14.695
36.7736	12.86
36.8153	11.74
36.8569	11.32
36.8986	11.045
36.9403	10.745
36.9819	9.505
37.0236	7.875
37.0653	8.265
37.1069	9.405
37.1486	9.715
37.1903	9.695
37.2319	8.815
37.2736	9.645
37.3153	10.605
37.3569	11.645
37.3986	12.7
37.4403	15.715
37.4819	21.395
37.5236	25.125
37.5653	27.535
37.6069	27.755
37.6486	26.62
37.6903	24.145
37.7319	21.025
37.7736	15.95
37.8153	13.06
37.8569	11.64
37.8986	10.685
37.9403	10.225
37.9819	11.08
38.0236	11.9
38.0653	12.025
38.1069	12.12
38.1486	12.19
38.1903	12.23
38.2319	12.245
38.2736	12.305
38.3153	12.665
38.3569	13.345
38.3986	14.67
38.4403	16.315
38.4819	18.225
38.5236	20.25
38.5653	25.49
38.6069	29.11
38.6486	27.04
38.6903	24.145
38.7319	19.57
38.7736	15.995
38.8153	13.78
38.8569	12.74
38.8986	12.395
38.9403	13.015
38.9819	12.815
39.0236	12.41
39.0653	12.66
39.1069	12.455
39.1486	12.155
39.1903	11.92
39.2319	11.985
39.2736	12.055
39.3153	12.455
39.3569	13.295
39.3986	14.285
39.4403	15.48
39.4819	16.335
39.5236	16.98
39.5653	16.955
39.6069	16.415
39.6486	16.005
39.6903	14.675
39.7319	14.36
39.7736	13.67
39.8153	13.04
39.8569	12.735
39.8986	12.23
39.9403	12.12
39.9819	11.475
40.0236	11.2
40.0653	10.865
40.1069	11.095
40.1486	10.77
40.1903	10.78
40.2319	11.22
40.2736	11.6
40.3153	11.985
40.3569	12.865
40.3986	14.035
40.4403	15.535
40.4819	16.645
40.5236	19.1
40.5653	20.16
40.6069	18.83
40.6486	19.255
40.6903	19.02
40.7319	17.475
40.7736	13.295
40.8153	10.68
40.8569	9.68
40.8986	9.015
40.9403	9.205
40.9819	10.63
41.0236	11.01
41.0653	11.145
41.1069	11.225
41.1486	11.25
41.1903	11.195
41.2319	10.88
41.2736	10.635
41.3153	11.37
41.3569	12.415
41.3986	13.21
41.4403	14.095
41.4819	15.585
41.5236	17.105
41.5653	16.975
41.6069	16.215
41.6486	15.895
41.6903	15.04
41.7319	14.255
41.7736	12.375
41.8153	11.795
41.8569	11.265
41.8986	9.27
41.9403	10.325
41.9819	10.63
42.0236	10.695
42.0653	10.705
42.1069	10.565
42.1486	10.55
42.1903	10.48
42.2319	10.275
42.2736	10.19
42.3153	10.415
42.3569	11.105
42.3986	11.695
42.4403	13.125
42.4819	13.18
42.5236	11.875
42.5653	11.86
42.6069	11.685
42.6486	11.69
42.6903	11.58
42.7319	10.79
42.7736	10.18
42.8153	9.825
42.8569	9.61
42.8986	9.45
42.9403	9.315
42.9819	9.15
43.0236	8.99
43.0653	8.84
43.1069	8.745
43.1486	8.635
43.1903	8.525
43.2319	8.545
43.2736	8.635
43.3153	9.47
43.3569	10.455
43.3986	10.625
43.4403	11.175
43.4819	11.885
43.5236	12.71
43.5653	12.555
43.6069	12.26
43.6486	12.575
43.6903	12.75
43.7319	11.745
43.7736	10.705
43.8153	9.695
43.8569	8.965
43.8986	9.025
43.9403	9.31
43.9819	9.485
44.0236	9.385
44.0653	9.335
44.1069	9.065
44.1486	9.595
44.1903	9.125
44.2319	8.07
44.2736	8.265
44.3153	8.785
44.3569	10.33
44.3986	10.925
44.4403	12.405
44.4819	19.375
44.5236	20.08
44.5653	23.785
44.6069	22.41
44.6486	20.63
44.6903	16.89
44.7319	13.84
44.7736	11.48
44.8153	10.405
44.8569	9.14
44.8986	8.755
44.9403	8.105
44.9819	7.64
45.0236	8.35
45.0653	8.625
45.1069	8.715
45.1486	9.455
45.1903	9.65
45.2319	9.61
45.2736	9.71
45.3153	10.225
45.3569	11.47
45.3986	13.035
45.4403	15.79
45.4819	19.375
45.5236	20.525
45.5653	21.925
45.6069	20.03
45.6486	18.41
45.6903	16.35
45.7319	14.23
45.7736	11.945
45.8153	10.755
45.8569	10.07
45.8986	10.195
45.9403	9.06
45.9819	8.23
46.0236	8.2
46.0653	7.83
46.1069	7.645
46.1486	7.24
46.1903	6.81
46.2319	6.38
46.2736	6.095
46.3153	6.685
46.3569	7.995
46.3986	9.13
46.4403	12.69
46.4819	14.295
46.5236	15.855
46.5653	15.775
46.6069	15.315
46.6486	14.72
46.6903	13.555
46.7319	12.87
46.7736	11.62
46.8153	10.88
46.8569	10.845
46.8986	11.155
46.9403	11.085
46.9819	11.525
47.0236	11.88
47.0653	11.74
47.1069	11.73
47.1486	11.565
47.1903	11.52
47.2319	11.535
47.2736	11.575
47.3153	11.545
47.3569	11.88
47.3986	12.75
47.4403	14.9
47.4819	17.61
47.5236	18.19
47.5653	19.61
47.6069	18.54
47.6486	16.47
47.6903	14.985
47.7319	13.605
47.7736	10.875
47.8153	9.625
47.8569	8.96
47.8986	8.16
47.9403	8.04
47.9819	7.895
48.0236	7.635
48.0653	7.215
48.1069	6.955
48.1486	6.35
48.1903	5.885
48.2319	5.49
48.2736	5.25
48.3153	5.715
48.3569	7.065
48.3986	9.075
48.4403	10.29
48.4819	10.28
48.5236	10.615
48.5653	10.61
48.6069	11.21
48.6486	11.645
48.6903	11.57
48.7319	11.05
48.7736	9.875
48.8153	8.98
48.8569	8.795
48.8986	9.14
48.9403	8.22
48.9819	7.54
49.0236	7.46
49.0653	8.135
49.1069	7.565
49.1486	7.325
49.1903	6.995
49.2319	6.705
49.2736	6.6
49.3153	6.65
49.3569	6.96
49.3986	8.125
49.4403	9.945
49.4819	11.56
49.5236	16.385
49.5653	18.135
49.6069	18.12
49.6486	17.38
49.6903	15.265
49.7319	11.08
49.7736	8.84
49.8153	7.255
49.8569	6.445
49.8986	5.9
49.9403	5.685
49.9819	5.465
50.0236	4.82
50.0653	5.405
50.1069	5.835
50.1486	4.625
50.1903	4.745
50.2319	4.88
50.2736	4.71
50.3153	4.88
50.3569	5.98
50.3986	7.405
50.4403	10.755
50.4819	14.885
50.5236	17.71
50.5653	19.59
50.6069	18.86
50.6486	17.205
50.6903	13.935
50.7319	10.3
50.7736	7.81
50.8153	6.885
50.8569	6.29
50.8986	5.665
50.9403	5.155
50.9819	4.355
51.0236	4.025
51.0653	4.645
51.1069	4.72
51.1486	3.93
51.1903	3.19
51.2319	2.495
51.2736	1.745
51.3153	1.785
51.3569	2.415
51.3986	3.31
51.4403	9.15
51.4819	14.575
51.5236	18.31
51.5653	19.615
51.6069	19.13
51.6486	17.35
51.6903	14.505
51.7319	9.755
51.7736	6.21
51.8153	4.585
51.8569	3.56
51.8986	2.74
51.9403	2.235
51.9819	1.77
52.0236	1.47
52.0653	1.135
52.1069	0.9
52.1486	0.61
52.1903	0.395
52.2319	0.18
52.2736	0.085
52.3153	0.11
52.3569	0.76
52.3986	2.9
52.4403	8.455
52.4819	13.835
52.5236	17.275
52.5653	19.05
52.6069	18.89
52.6486	17.58
52.6903	13.33
52.7319	8.565
52.7736	5.67
52.8153	3.91
52.8569	2.94
52.8986	2.26
52.9403	1.54
52.9819	1.065
53.0236	0.705
53.0653	0.4
53.1069	0.12
53.1486	-0.135
53.1903	-0.33
53.2319	-0.55
53.2736	-0.685
53.3153	-0.57
53.3569	-0.175
53.3986	0.29
53.4403	6.145
53.4819	12.695
53.5236	16.77
53.5653	18.595
53.6069	18.855
53.6486	17.54
53.6903	14.45
53.7319	8.675
53.7736	4.735
53.8153	3
53.8569	2.03
53.8986	1.225
53.9403	0.615
53.9819	0.17
54.0236	-0.1
54.0653	-0.44
54.1069	-0.725
54.1486	-0.95
54.1903	-1.185
54.2319	-1.405
54.2736	-1.575
54.3153	-1.48
54.3569	-1.075
54.3986	-0.5
54.4403	3.52
54.4819	10.965
54.5236	15.535
54.5653	17.95
54.6069	18.535
54.6486	16.675
54.6903	13.775
54.7319	7.795
54.7736	4.22
54.8153	2.78
54.8569	2.53
54.8986	2.095
54.9403	1.7
54.9819	0.69
55.0236	0.2
55.0653	-0.16
55.1069	-0.23
55.1486	-0.125
55.1903	-0.025
55.2319	0.1
55.2736	0.28
55.3153	0.7
55.3569	1.66
55.3986	3.505
55.4403	6.795
55.4819	11.325
55.5236	14.675
55.5653	16.55
55.6069	16.11
55.6486	14.46
55.6903	11.835
55.7319	8.205
55.7736	5.555
55.8153	4.555
55.8569	3.815
55.8986	3.645
55.9403	3.405
55.9819	2.75
56.0236	2.35
56.0653	2.075
56.1069	1.765
56.1486	1.645
56.1903	1.94
56.2319	2.715
56.2736	1.895
56.3153	1.595
56.3569	2.05
56.3986	2.86
56.4403	7.51
56.4819	12.845
56.5236	14.615
56.5653	16.69
56.6069	17.28
56.6486	16.95
56.6903	14.875
56.7319	9.86
56.7736	8.09
56.8153	7.865
56.8569	7.485
56.8986	7.13
56.9403	6.99
56.9819	6.87
57.0236	6.75
57.0653	6.61
57.1069	6.475
57.1486	6.365
57.1903	6.29
57.2319	6.22
57.2736	6.115
57.3153	6.13
57.3569	6.585
57.3986	7.315
57.4403	8.185
57.4819	8.89
57.5236	8.985
57.5653	9.07
57.6069	9.01
57.6486	8.97
57.6903	8.165
57.7319	7.135
57.7736	6.59
57.8153	6.375
57.8569	6.29
57.8986	6.24
57.9403	6.195
57.9819	6.15
58.0236	6.14
58.0653	6.025
58.1069	5.995
58.1486	5.93
58.1903	5.85
58.2319	5.81
58.2736	5.77
58.3153	5.8
58.3569	6.235
58.3986	7.095
58.4403	8.035
58.4819	8.875
58.5236	10.92
58.5653	10.58
58.6069	10.47
58.6486	9.495
58.6903	8.165
58.7319	7.155
58.7736	6.525
58.8153	6.23
58.8569	5.99
58.8986	5.87
58.9403	5.87
58.9819	5.855
59.0236	5.745
59.0653	4.51
59.1069	3.81
59.1486	4.15
59.1903	4.565
59.2319	4.9
59.2736	5.38
59.3153	5.525
59.3569	5.87
59.3986	7.435
59.4403	8.865
59.4819	9.515
59.5236	9.435
59.5653	8.84
59.6069	8.915
59.6486	8.605
59.6903	7.845
59.7319	7.085
59.7736	6.485
59.8153	6.35
59.8569	6.295
59.8986	6.22
59.9403	6.155
59.9819	6.105
60.0236	6.03
60.0653	5.935
60.1069	5.805
60.1486	5.66
60.1903	5.53
60.2319	5.4
60.2736	5.315
60.3153	5.35
60.3569	5.815
60.3986	6.585
60.4403	7.55
60.4819	10.53
60.5236	11.41
60.5653	15.515
60.6069	16.76
60.6486	15.05
60.6903	11.585
60.7319	6.245
60.7736	3.72
60.8153	2.485
60.8569	1.66
60.8986	0.915
60.9403	0.425
60.9819	0.06
61.0236	0.035
61.0653	0.235
61.1069	0.365
61.1486	0.715
61.1903	0.545
61.2319	0.395
61.2736	0.26
61.3153	-0.18
61.3569	0.06
61.3986	0.31
61.4403	3.73
61.4819	10.005
61.5236	13.835
61.5653	15.3
61.6069	15.575
61.6486	13.77
61.6903	9.925
61.7319	4.58
61.7736	2.205
61.8153	0.85
61.8569	0.035
61.8986	-0.375
61.9403	0.495
61.9819	0.78
62.0236	-0.09
62.0653	-1.04
62.1069	-1.475
62.1486	-1.545
62.1903	-1.175
62.2319	-1.68
62.2736	-2.02
62.3153	-1.895
62.3569	-0.3
62.3986	-0.205
62.4403	2.315
62.4819	4.28
62.5236	5.815
62.5653	6.49
62.6069	6.35
62.6486	5.97
62.6903	5.315
62.7319	4.56
62.7736	4.095
62.8153	3.94
62.8569	3.91
62.8986	3.925
62.9403	3.905
62.9819	3.925
63.0236	3.905
63.0653	3.885
63.1069	3.91
63.1486	3.945
63.1903	3.95
63.2319	3.95
63.2736	3.945
63.3153	3.965
63.3569	4.275
63.3986	4.79
63.4403	4.975
63.4819	5.885
63.5236	6.94
63.5653	7.39
63.6069	7.055
63.6486	6.28
63.6903	5.89
63.7319	5.605
63.7736	5.39
63.8153	5.335
63.8569	5.385
63.8986	5.33
63.9403	5.335
63.9819	5.265
64.0236	5.12
64.0653	5.04
64.1069	5.115
64.1486	5.205
64.1903	5.18
64.2319	5.11
64.2736	5.195
64.3153	5.3
64.3569	5.53
64.3986	5.795
64.4403	6.22
64.4819	6.405
64.5236	6.7
64.5653	7.335
64.6069	7.26
64.6486	6.675
64.6903	6.2
64.7319	5.86
64.7736	5.72
64.8153	5.635
64.8569	5.585
64.8986	5.54
64.9403	5.575
64.9819	5.55
65.0236	5.565
65.0653	5.545
65.1069	5.505
65.1486	5.55
65.1903	5.58
65.2319	5.685
65.2736	5.645
65.3153	5.61
65.3569	5.51
65.3986	5.74
65.4403	6.265
65.4819	6.915
65.5236	7.925
65.5653	9.085
65.6069	8.655
65.6486	7.645
65.6903	6.635
65.7319	5.755
65.7736	5.71
65.8153	5.53
65.8569	5.515
65.8986	5.53
65.9403	5.48
65.9819	5.445
66.0236	5.48
66.0653	5.505
66.1069	5.42
66.1486	5.335
66.1903	5.3
66.2319	5.235
66.2736	5.155
66.3153	5.07
66.3569	5.105
66.3986	5.31
66.4403	5.615
66.4819	5.885
66.5236	6.065
66.5653	6.065
66.6069	5.975
66.6486	5.68
66.6903	5.32
66.7319	4.96
66.7736	4.755
66.8153	4.71
66.8569	4.49
66.8986	3.675
66.9403	4.44
66.9819	4.84
67.0236	5.1
67.0653	5.385
67.1069	5.595
67.1486	5.605
67.1903	5.615
67.2319	5.78
67.2736	5.965
67.3153	6.05
67.3569	6.215
67.3986	6.36
67.4403	6.96
67.4819	10.775
67.5236	10.45
67.5653	9.7
67.6069	10.46
67.6486	8.095
67.6903	6.29
67.7319	5.07
67.7736	5.235
67.8153	5.775
67.8569	5.92
67.8986	5.96
67.9403	6.06
67.9819	6.105
68.0236	5.98
68.0653	5.56
68.1069	5.425
68.1486	5.205
68.1903	5.08
68.2319	5.1
68.2736	5.095
68.3153	5.07
68.3569	5.365
68.3986	6.21
68.4403	7.03
68.4819	7.735
68.5236	7.97
68.5653	8.44
68.6069	8.71
68.6486	8.295
68.6903	7.275
68.7319	6.26
68.7736	5.885
68.8153	5.825
68.8569	5.75
68.8986	5.815
68.9403	5.715
68.9819	5.565
69.0236	5.56
69.0653	5.875
69.1069	6.1
69.1486	6.25
69.1903	6.345
69.2319	6.45
69.2736	6.16
69.3153	6.105
69.3569	6.555
69.3986	7.5
69.4403	7.935
69.4819	8.88
69.5236	9.4
69.5653	9.05
69.6069	8.12
69.6486	7.31
69.6903	6.525
69.7319	6.025
69.7736	5.78
69.8153	5.575
69.8569	5.105
69.8986	5.065
69.9403	5.1
69.9819	5.03
70.0236	5.1
70.0653	5.065
70.1069	5.025
70.1486	4.945
70.1903	4.815
70.2319	4.69
70.2736	4.54
70.3153	4.415
70.3569	4.36
70.3986	4.6
70.4403	4.695
70.4819	4.865
70.5236	4.95
70.5653	4.9
70.6069	4.725
70.6486	4.545
70.6903	4.375
70.7319	4.125
70.7736	3.94
70.8153	3.85
70.8569	3.84
70.8986	3.815
70.9403	3.81
70.9819	3.795
71.0236	3.715
71.0653	3.585
71.1069	3.5
71.1486	3.415
71.1903	3.315
71.2319	3.265
71.2736	3.235
71.3153	3.205
71.3569	3.195
71.3986	3.3
71.4403	3.605
71.4819	3.945
71.5236	4.2
71.5653	4.675
71.6069	4.88
71.6486	4.365
71.6903	3.755
71.7319	3.375
71.7736	3.145
71.8153	2.925
71.8569	2.865
71.8986	2.86
71.9403	2.81
71.9819	2.75
72.0236	2.675
72.0653	2.6
72.1069	2.615
72.1486	2.705
72.1903	2.805
72.2319	2.84
72.2736	2.875
72.3153	2.84
72.3569	2.935
72.3986	3.22
72.4403	3.555
72.4819	3.915
72.5236	4.145
72.5653	4.395
72.6069	4.645
72.6486	4.185
72.6903	4.05
72.7319	3.99
72.7736	3.98
72.8153	4.02
72.8569	4.06
72.8986	4.03
72.9403	3.955
72.9819	4.08
73.0236	4.14
73.0653	4.24
73.1069	4.255
73.1486	4.39
73.1903	4.435
73.2319	4.42
73.2736	4.445
73.3153	4.49
73.3569	4.64
73.3986	4.865
73.4403	5.01
73.4819	5.06
73.5236	5.2
73.5653	5.345
73.6069	5.365
73.6486	5.06
73.6903	4.89
73.7319	4.815
73.7736	4.765
73.8153	4.755
73.8569	4.74
73.8986	4.63
73.9403	4.62
73.9819	4.695
74.0236	4.74
74.0653	4.685
74.1069	4.66
74.1486	4.615
74.1903	4.565
74.2319	4.61
74.2736	4.575
74.3153	4.505
74.3569	4.535
74.3986	4.64
74.4403	4.66
74.4819	4.915
74.5236	5.2
74.5653	5.35
74.6069	5
74.6486	4.68
74.6903	4.365
74.7319	4.25
74.7736	4.215
74.8153	4.065
74.8569	3.655
74.8986	3.27
74.9403	2.61
74.9819	2.655
75.0236	2.895
75.0653	2.85
75.1069	2.875
75.1486	3.065
75.1903	3.175
75.2319	3.125
75.2736	2.88
75.3153	2.68
75.3569	1.48
75.3986	1.095
75.4403	2.53
75.4819	7.805
75.5236	6.455
75.5653	5.94
75.6069	5.625
75.6486	4.96
75.6903	3.815
75.7319	2.43
75.7736	2.475
75.8153	2.26
75.8569	1.655
75.8986	2.355
75.9403	2.54
75.9819	2.51
76.0236	2.525
76.0653	2.415
76.1069	2.55
76.1486	2.885
76.1903	2.955
76.2319	3.065
76.2736	3.16
76.3153	3.165
76.3569	3.29
76.3986	3.69
76.4403	3.775
76.4819	6.515
76.5236	7.615
76.5653	7.13
76.6069	7.7
76.6486	5.655
76.6903	4.79
76.7319	4.64
76.7736	4.845
76.8153	5.1
76.8569	5.475
76.8986	5.51
76.9403	5.5
76.9819	5.085
77.0236	5.05
77.0653	4.275
77.1069	4.165
77.1486	2.89
77.1903	3.215
77.2319	3.04
77.2736	3.36
77.3153	3.505
77.3569	3.98
77.3986	4.475
77.4403	4.905
77.4819	5.63
77.5236	8.255
77.5653	8.675
77.6069	8.315
77.6486	7.255
77.6903	4.555
77.7319	2.92
77.7736	2.43
77.8153	1.955
77.8569	1.51
77.8986	1.665
77.9403	1.395
77.9819	1.155
78.0236	0.7
78.0653	0.505
78.1069	0.605
78.1486	0.495
78.1903	0.36
78.2319	0.295
78.2736	0.26
78.3153	0.165
78.3569	0.205
78.3986	0.39
78.4403	1.01
78.4819	3.875
78.5236	7.485
78.5653	8.4
78.6069	7.74
78.6486	5.235
78.6903	4.1
78.7319	3.295
78.7736	1.92
78.8153	0.88
78.8569	0.69
78.8986	0.465
78.9403	0.265
78.9819	0.055
79.0236	-0.18
79.0653	-0.4
79.1069	-0.55
79.1069	-0.6
79.1486	-0.635
79.1903	-0.75
79.2319	-0.925
79.2736	-1.09
79.3153	-1.095
79.3569	-0.885
79.3986	-0.44
79.4403	1.445
79.4819	4.155
79.5236	6.48
79.5653	6.94
79.6069	5.795
79.6486	2.43
79.6903	0.99
79.7319	0.515
79.7736	0.12
79.8153	-0.07
79.8569	-0.27
79.8986	-0.345
79.9403	-0.015
79.9819	-0.475
80.0236	-0.85
80.0653	-1.135
80.1069	-1.375
80.1486	-1.645
80.1903	-1.87
80.2319	-2.04
80.2736	-2.23
80.3153	-2.23
80.3569	-1.935
80.3986	-1.23
80.4403	0.79
80.4819	2.19
80.5236	2.135
80.5653	0.96
80.6069	0.31
80.6486	-0.11
80.6903	-0.11
80.7319	0.025
80.7736	0.03
80.8153	0.055
80.8569	0.015
80.8986	-0.01
80.9403	-0.075
80.9819	0.05
81.0236	0.1
81.0653	0.05
81.1069	0.15
81.1486	0.295
81.1903	0.36
81.2319	0.345
81.2736	0.36
81.3153	0.43
81.3569	0.64
81.3986	1.03
81.4403	3.765
81.4819	2.37
81.5236	3.29
81.5653	3.72
81.6069	2.8
81.6486	2.3
81.6903	2.095
81.7319	1.96
81.7736	1.875
81.8153	1.855
81.8569	1.58
81.8986	1.535
81.9403	1.375
81.9819	1.32
82.0236	0.74
82.0653	0.605
82.1069	0.595
82.1486	0.61
82.1903	0.69
82.2319	0.77
82.2736	0.835
82.3153	0.89
82.3569	1.115
82.3986	1.4
82.4403	1.76
82.4819	3.105
82.5236	3.235
82.5653	3.21
82.6069	2.24
82.6486	0.785
82.6903	0.295
82.7319	0.095
82.7736	-0.01
82.8153	0.25
82.8569	0.39
82.8986	0.415
82.9403	0.17
82.9819	0.25
83.0236	0.25
83.0653	0.255
83.1069	0.25
83.1486	0.135
83.1903	-0.085
83.2319	-0.33
[truncated: 5,931 more rows]

## Sheet: South_Sweden_16
Days_from_sowing	Temperature_oC
0	21.81
0.0277778	21.815
0.0694444	21.81
0.111111	21.805
0.152778	21.805
0.194444	21.81
0.236111	21.81
0.277778	21.8
0.319444	21.82
0.361111	22.06
0.402778	22.36
0.444444	22.495
0.486111	22.515
0.527778	22.535
0.569444	22.655
0.611111	22.61
0.652778	22.545
0.694444	22.505
0.736111	22.475
0.777778	22.445
0.819444	22.395
0.861111	22.315
0.902778	22.285
0.944444	22.225
0.986111	22.165
1.02778	22.115
1.06944	22.075
1.11111	22.05
1.15278	22.01
1.19444	21.975
1.23611	21.945
1.27778	21.9
1.31944	21.92
1.36111	22.135
1.40278	22.515
1.44444	22.88
1.48611	23.115
1.52778	23.375
1.56944	23.55
1.61111	23.79
1.65278	23.985
1.69444	24.14
1.73611	24.005
1.77778	23.69
1.81944	23.41
1.86111	23.21
1.90278	23.045
1.94444	22.905
1.98611	22.8
2.02778	22.72
2.06944	22.645
2.11111	22.585
2.15278	22.555
2.19444	22.525
2.23611	22.505
2.27778	22.495
2.31944	22.51
2.36111	22.7
2.40278	23.06
2.44444	23.37
2.48611	23.73
2.52778	23.925
2.56944	23.735
2.61111	23.765
2.65278	23.585
2.69444	23.595
2.73611	23.39
2.77778	23.2
2.81944	23.04
2.86111	22.835
2.90278	22.715
2.94444	22.635
2.98611	22.575
3.02778	22.52
3.06944	22.42
3.11111	22.37
3.15278	22.33
3.19444	22.265
3.23611	22.21
3.27778	22.17
3.31944	22.16
3.36111	22.275
3.40278	22.575
3.44444	22.79
3.48611	22.86
3.52778	22.905
3.56944	22.945
3.61111	22.92
3.65278	22.85
3.69444	22.855
3.73611	22.8
3.77778	22.72
3.81944	22.63
3.86111	22.565
3.90278	22.48
3.94444	22.415
3.98611	22.395
4.02778	22.395
4.06944	22.38
4.11111	22.37
4.15278	22.37
4.19444	22.355
4.23611	22.355
4.27778	22.38
4.31944	22.42
4.36111	22.475
4.40278	22.5
4.44444	22.59
4.48611	22.74
4.52778	22.88
4.56944	22.92
4.61111	22.88
4.65278	22.85
4.69444	22.795
4.73611	22.69
4.77778	22.545
4.81944	22.47
4.86111	22.33
4.90278	22.2
4.94444	22.09
4.98611	22.03
5.02778	21.99
5.06944	21.95
5.11111	21.925
5.15278	21.885
5.19444	21.835
5.23611	21.785
5.27778	21.735
5.31944	21.755
5.36111	21.91
5.40278	22.17
5.44444	22.43
5.48611	22.75
5.52778	23.07
5.56944	23.27
5.61111	23.275
5.65278	23.43
5.69444	23.62
5.73611	23.785
5.77778	23.735
5.81944	23.42
5.86111	23.14
5.90278	22.905
5.94444	22.72
5.98611	22.58
6.02778	22.495
6.06944	22.435
6.11111	22.38
6.15278	22.345
6.19444	22.315
6.23611	22.31
6.27778	22.29
6.31944	22.29
6.36111	22.435
6.40278	22.775
6.44444	23.155
6.48611	23.605
6.52778	23.89
6.56944	24.025
6.61111	24.155
6.65278	24.265
6.69444	24.325
6.73611	24.3
6.77778	23.945
6.81944	23.675
6.86111	23.46
6.90278	23.27
6.94444	23.06
6.98611	22.87
7.02778	22.74
7.06944	22.625
7.11111	22.565
7.15278	22.465
7.19444	22.395
7.23611	22.38
7.27778	22.36
7.31944	22.38
7.36111	22.59
7.40278	22.94
7.44444	23.335
7.48611	23.76
7.52778	24.1
7.56944	24.225
7.61111	24.265
7.65278	24.245
7.69444	24.25
7.73611	24.075
7.77778	23.765
7.81944	23.505
7.86111	23.3
7.90278	23.145
7.94444	23.04
7.98611	22.92
8.02778	22.805
8.06944	22.68
8.11111	22.635
8.15278	22.595
8.19444	22.59
8.23611	22.54
8.27778	22.475
8.31944	22.43
8.36111	22.5
8.40278	22.84
8.44444	23.39
8.48611	23.855
8.52778	24.185
8.56944	24.365
8.61111	24.255
8.65278	24.405
8.69444	24.555
8.73611	24.635
8.77778	24.33
8.81944	23.97
8.86111	23.73
8.90278	23.595
8.94444	23.445
8.98611	23.315
9.02778	23.225
9.06944	23.145
9.11111	23.08
9.15278	23.01
9.19444	22.97
9.23611	22.94
9.27778	22.91
9.31944	22.895
9.36111	23.06
9.40278	23.355
9.44444	23.69
9.48611	23.915
9.52778	24.01
9.56944	24.055
9.61111	24.05
9.65278	24.32
9.69444	22.425
9.73611	21.465
9.77778	20.87
9.81944	20.485
9.86111	20.225
9.90278	19.835
9.94444	19.465
9.98611	19.44
10.0278	19.155
10.0694	19.095
10.1111	18.47
10.1528	18.245
10.1944	18.005
10.2361	17.81
10.2778	17.665
10.3194	17.84
10.3611	18.87
10.4028	19.17
10.4444	20.06
10.4861	21.225
10.5278	21.135
10.5694	20.955
10.6111	20.46
10.6528	20.17
10.6944	20.27
10.7361	19.945
10.7778	19.065
10.8194	18.27
10.8611	17.775
10.9028	17.38
10.9444	17.325
10.9861	17.04
11.0278	16.8
11.0694	16.535
11.1111	16.295
11.1528	16.095
11.1944	15.97
11.2361	15.805
11.2778	15.84
11.3194	15.9
11.3611	17.075
11.4028	18.48
11.4444	19.465
11.4861	20.28
11.5278	19.795
11.5694	19.965
11.6111	19.885
11.6528	19.69
11.6944	19.43
11.7361	18.405
11.7778	17.675
11.8194	17.485
11.8611	17.395
11.9028	17.24
11.9444	16.91
11.9861	16.975
12.0278	16.92
12.0694	16.86
12.1111	16.835
12.1528	16.775
12.1944	16.71
12.2361	16.65
12.2778	16.58
12.3194	16.585
12.3611	16.83
12.4028	17.43
12.4444	18.81
12.4861	19.88
12.5278	20.64
12.5694	21.09
12.6111	20.63
12.6528	21.49
12.6944	21.64
12.7361	20.785
12.7778	19.41
12.8194	18.685
12.8611	17.945
12.9028	17.44
12.9444	17.13
12.9861	17.11
13.0278	17.18
13.0694	17.165
13.1111	17.115
13.1528	17.035
13.1944	16.685
13.2361	16.485
13.2778	16.2
13.3194	16.175
13.3611	17.045
13.4028	18.54
13.4444	20.35
13.4861	21.475
13.5278	22.155
13.5694	22.175
13.6111	21.725
13.6528	21.415
13.6944	20.985
13.7361	20.515
13.7778	19.58
13.8194	19.2
13.8611	19.065
13.9028	18.675
13.9444	18.1
13.9861	17.955
14.0278	17.89
14.0694	17.715
14.1111	17.37
14.1528	16.965
14.1944	16.645
14.2361	16.395
14.2778	16.205
14.3194	16.185
14.3611	17.225
14.4028	17.82
14.4444	18.26
14.4861	18.555
14.5278	20.45
14.5694	22.05
14.6111	20.515
14.6528	20.955
14.6944	17.475
14.7361	13.835
14.7778	12.135
14.8194	10.495
14.8611	9.32
14.9028	8.33
14.9444	7.59
14.9861	6.845
15.0278	6.28
15.0694	6.385
15.1111	5.615
15.1528	5.24
15.1944	4.755
15.2361	4.315
15.2778	4.005
15.3194	5.015
15.3611	9.76
15.4028	16.355
15.4444	19.09
15.4861	22.395
15.5278	24.505
15.5694	24.74
15.6111	23.535
15.6528	21.835
15.6944	20.045
15.7361	17.855
15.7778	14.615
15.8194	12.235
15.8611	11.17
15.9028	10.475
15.9444	10.11
15.9861	10.375
16.0278	10.33
16.0694	9.925
16.1111	10.23
16.1528	10.345
16.1944	9.575
16.2361	8.81
16.2778	8.835
16.3194	9.345
16.3611	9.98
16.4028	13.725
16.4444	20.54
16.4861	24.36
16.5278	26.89
16.5694	29.425
16.6111	25.13
16.6528	23.94
16.6944	19.84
16.7361	17.305
16.7778	15.815
16.8194	13.105
16.8611	11.37
16.9028	10.555
16.9444	10.16
16.9861	10.05
17.0278	9.955
17.0694	9.305
17.1111	8.84
17.1528	9.075
17.1944	8.21
17.2361	8.13
17.2778	7.74
17.3194	8.515
17.3611	11.945
17.4028	15.98
17.4444	21.42
17.4861	18.97
17.5278	24.515
17.5694	27.925
17.6111	29.21
17.6528	25.13
17.6944	19.725
17.7361	16.5
17.7778	14.22
17.8194	11.79
17.8611	10.485
17.9028	9.7
17.9444	9.35
17.9861	8.735
18.0278	7.8
18.0694	7.205
18.1111	7.34
18.1528	6.67
18.1944	6.23
18.2361	5.935
18.2778	5.515
18.3194	5.93
18.3611	9.435
18.4028	14.02
18.4444	18.745
18.4861	24.46
18.5278	26.885
18.5694	28.345
18.6111	25.08
18.6528	23.48
18.6944	19.295
18.7361	16.665
18.7778	14.17
18.8194	11.94
18.8611	11.13
18.9028	10.19
18.9444	9.47
18.9861	8.535
19.0278	7.86
19.0694	7.305
19.1111	7.23
19.1528	7.635
19.1944	7.245
19.2361	6.83
19.2778	6.365
19.3194	6.32
19.3611	7.03
19.4028	11.26
19.4444	18.52
19.4861	19.885
19.5278	25.305
19.5694	25.065
19.6111	23.625
19.6528	23.245
19.6944	19.11
19.7361	15.77
19.7778	13.525
19.8194	11.755
19.8611	10.71
19.9028	9.49
19.9444	8.44
19.9861	7.6
20.0278	7.19
20.0694	6.61
20.1111	6.065
20.1528	6.95
20.1944	8.105
20.2361	7.09
20.2778	6.725
20.3194	7.43
20.3611	10.18
20.4028	13.715
20.4444	16.695
20.4861	18.975
20.5278	25.225
20.5694	27.3
20.6111	23.945
20.6528	23.595
20.6944	20.135
20.7361	18.72
20.7778	14.26
20.8194	12.095
20.8611	11.625
20.9028	10.745
20.9444	10.155
20.9861	10.6
21.0278	11.445
21.0694	11.835
21.1111	12.76
21.1528	13.075
21.1944	13.57
21.2361	13.075
21.2778	13.27
21.3194	13.22
21.3611	13.64
21.4028	14.525
21.4444	17.905
21.4861	21.83
21.5278	20.645
21.5694	21.19
21.6111	20.12
21.6528	18.725
21.6944	17.28
21.7361	15.01
21.7778	13.335
21.8194	12.43
21.8611	12.68
21.9028	12.56
21.9444	12.47
21.9861	12.205
22.0278	11.59
22.0694	12.085
22.1111	12.445
22.1528	12.81
22.1944	13.125
22.2361	13.37
22.2778	13.8
22.3194	14.52
22.3611	15.74
22.4028	16.935
22.4444	18.325
22.4861	18.655
22.5278	17.85
22.5694	20.165
22.6111	19.715
22.6528	17.93
22.6944	17.035
22.7361	16.22
22.7778	14.715
22.8194	13.455
22.8611	12.31
22.9028	11.65
22.9444	11.295
22.9861	10.75
23.0278	10.545
23.0694	10.725
23.1111	9.885
23.1528	9.445
23.1944	9.41
23.2361	10.505
23.2778	8.905
23.3194	9.525
23.3611	10.785
23.4028	14.85
23.4444	16.755
23.4861	19.795
23.5278	17.07
23.5694	17.585
23.6111	20.01
23.6528	17.68
23.6944	15.97
23.7361	13.585
23.7778	11.815
23.8194	10.09
23.8611	8.935
23.9028	7.705
23.9444	7.64
23.9861	7.7
24.0278	7.595
24.0694	7.65
24.1111	7.515
24.1528	6.965
24.1944	6.93
24.2361	6.925
24.2778	6.43
24.3194	6.59
24.3611	10.035
24.4028	14.65
24.4444	18.325
24.4861	20.995
24.5278	19.34
24.5694	21.755
24.6111	22.52
24.6528	18.89
24.6944	16.375
24.7361	13.35
24.7778	11.285
24.8194	10.015
24.8611	9.37
24.9028	9.005
24.9444	8.72
24.9861	8.625
25.0278	9.33
25.0694	9.235
25.1111	9.09
25.1528	9.485
25.1944	9.565
25.2361	9.645
25.2778	9.875
25.3194	10.115
25.3611	11.45
25.4028	13.465
25.4444	14.96
25.4861	14.01
25.5278	12.825
25.5694	12.45
25.6111	12.03
25.6528	12.05
25.6944	12.76
25.7361	14.55
25.7778	12.565
25.8194	11.78
25.8611	11.43
25.9028	11.26
25.9444	11.295
25.9861	11.345
26.0278	11.285
26.0694	11.35
26.1111	11.36
26.1528	11.35
26.1944	11.345
26.2361	11.28
26.2778	11.265
26.3194	11.3
26.3611	11.45
26.4028	12.155
26.4444	12.795
26.4861	13.875
26.5278	14.31
26.5694	14.645
26.6111	15.945
26.6528	15.345
26.6944	14.59
26.7361	11.98
26.7778	9.87
26.8194	8.475
26.8611	7.515
26.9028	6.705
26.9444	6.03
26.9861	5.43
27.0278	4.985
27.0694	4.6
27.1111	4.135
27.1528	3.68
27.1944	3.135
27.2361	2.65
27.2778	2.495
27.3194	2.505
27.3611	5.78
27.4028	9.985
27.4444	14.04
27.4861	16.92
27.5278	17.775
27.5694	15.205
27.6111	14.43
27.6528	12.25
27.6944	11.505
27.7361	9.555
27.7778	6.99
27.8194	5.34
27.8611	4.5
27.9028	3.84
27.9444	3.275
27.9861	2.875
28.0278	2.705
28.0694	2.535
28.1111	2.105
28.1528	1.915
28.1944	1.42
28.2361	1.3
28.2778	1.075
28.3194	1.455
28.3611	4.675
28.4028	8.76
28.4444	12.205
28.4861	15.11
28.5278	14.08
28.5694	13.32
28.6111	13.1
28.6528	9.695
28.6944	7.915
28.7361	6.585
28.7778	5.105
28.8194	4.01
28.8611	3.115
28.9028	4.62
28.9444	5.25
28.9861	3.87
29.0278	2.845
29.0694	3.43
29.1111	4.71
29.1528	5.47
29.1944	5.9
29.2361	6.32
29.2778	6.39
29.3194	6.76
29.3611	7.36
29.4028	8.13
29.4444	8.975
29.4861	9.505
29.5278	9.86
29.5694	10.555
29.6111	14.355
29.6528	10.33
29.6944	8.835
29.7361	7.86
29.7778	6.635
29.8194	5.955
29.8611	6.67
29.9028	7.265
29.9444	7.5
29.9861	7.845
30.0278	8.055
30.0694	8.11
30.1111	8.04
30.1528	7.96
30.1944	7.655
30.2361	7.385
30.2778	7.26
30.3194	6.445
30.3611	6.73
30.4028	9.265
30.4444	10.285
30.4861	10.525
30.5278	12.05
30.5694	13.945
30.6111	15.42
30.6528	10.13
30.6944	8.44
30.7361	7.285
30.7778	8.155
30.8194	8.115
30.8611	7.51
30.9028	7.48
30.9444	5.485
30.9861	6.8
31.0278	7.2
31.0694	5.075
31.1111	5.98
31.1528	4.78
31.1944	5.635
31.2361	4.295
31.2778	4.895
31.3194	5.58
31.3611	7.3
31.4028	8.415
31.4444	11.245
31.4861	9.865
31.5278	10.2
31.5694	10.865
31.6111	9.86
31.6528	9.315
31.6944	9.245
31.7361	8.54
31.7778	7.905
31.8194	7.36
31.8611	7.12
31.9028	6.88
31.9444	6.675
31.9861	6.425
32.0278	6.37
32.0694	6.24
32.1111	6.09
32.1528	6.06
32.1944	5.89
32.2361	5.65
32.2778	5.69
32.3194	5.9
32.3611	6.825
32.4028	10.215
32.4444	9.685
32.4861	10.38
32.5278	9.89
32.5694	10.64
32.6111	10.605
32.6528	10.665
32.6944	9.67
32.7361	9.16
32.7778	8.53
32.8194	8.255
32.8611	8.115
32.9028	7.91
32.9444	7.755
32.9861	7.91
33.0278	7.865
33.0694	7.675
33.1111	7.745
33.1528	7.6
33.1944	7.46
33.2361	7.605
33.2778	7.655
33.3194	7.775
33.3611	8.06
33.4028	8.68
33.4444	9.535
33.4861	9.695
33.5278	9.455
33.5694	9.835
33.6111	9.62
33.6528	9.015
33.6944	8.53
33.7361	8.045
33.7778	7.62
33.8194	7.44
33.8611	7.295
33.9028	7.145
33.9444	7.11
33.9861	6.98
34.0278	6.745
34.0694	6.545
34.1111	6.385
34.1528	6.315
34.1944	6.305
34.2361	6.295
34.2778	6.26
34.3194	6.205
34.3611	6.4
34.4028	7.195
34.4444	7.71
34.4861	7.9
34.5278	8.33
34.5694	8.59
34.6111	8.335
34.6528	7.98
34.6944	7.805
34.7361	7.475
34.7778	6.47
34.8194	6.34
34.8611	6.195
34.9028	5.995
34.9444	6.06
34.9861	6.12
35.0278	6.18
35.0694	6.245
35.1111	6.265
35.1528	6.15
35.1944	6.05
35.2361	6.075
35.2778	6.075
35.3194	5.99
35.3611	6.07
35.4028	6.35
35.4444	6.63
35.4861	7.11
35.5278	7.885
35.5694	8.255
35.6111	7.995
35.6528	7.745
35.6944	7.415
35.7361	7.06
35.7778	6.81
35.8194	6.685
35.8611	6.62
35.9028	6.58
35.9444	6.56
35.9861	6.595
36.0278	6.58
36.0694	6.425
36.1111	6.265
36.1528	5.99
36.1944	4.87
36.2361	5.49
36.2778	5.685
36.3194	5.885
36.3611	6.36
36.4028	7.715
36.4444	8.27
36.4861	8.545
36.5278	9.08
36.5694	9.245
36.6111	9.855
36.6528	10
36.6944	9.1
36.7361	8.07
36.7778	7.295
36.8194	6.635
36.8611	6.41
36.9028	6.35
36.9444	6.255
36.9861	6.165
37.0278	5.92
37.0694	6.17
37.1111	6.285
37.1528	6.28
37.1944	6.145
37.2361	5.565
37.2778	5.77
37.3194	6.06
37.3611	6.835
37.4028	7.545
37.4444	8.46
37.4861	9.245
37.5278	10.285
37.5694	10.165
37.6111	9.68
37.6528	9.255
37.6944	8.865
37.7361	8.105
37.7778	7.51
37.8194	7.25
37.8611	6.905
37.9028	6.745
37.9444	6.725
37.9861	6.765
38.0278	6.82
38.0694	6.93
38.1111	7.015
38.1528	7.04
38.1944	6.985
38.2361	6.915
38.2778	6.885
38.3194	6.88
38.3611	7.095
38.4028	7.625
38.4444	8.53
38.4861	9.265
38.5278	10.255
38.5694	10.575
38.6111	11.945
38.6528	8.655
38.6944	7.995
38.7361	7.215
38.7778	6.855
38.8194	6.84
38.8611	6.93
38.9028	7.115
38.9444	7.205
38.9861	7.245
39.0278	7.29
39.0694	7.155
39.1111	6.88
39.1528	6.835
39.1944	6.88
39.2361	6.86
39.2778	6.92
39.3194	7
39.3611	7.115
39.4028	7.165
39.4444	7.265
39.4861	7.36
39.5278	7.495
39.5694	7.55
39.6111	7.58
39.6528	7.42
39.6944	7.13
39.7361	7.075
39.7778	6.965
39.8194	7.025
39.8611	6.99
39.9028	6.985
39.9444	7.055
39.9861	7.125
40.0278	7.21
40.0694	7.195
40.1111	7.205
40.1528	7.225
40.1944	7.245
40.2361	7.27
40.2778	7.335
40.3194	7.4
40.3611	7.62
40.4028	7.89
40.4444	8.385
40.4861	8.745
40.5278	8.805
40.5694	8.89
40.6111	8.66
40.6528	8.41
40.6944	8.05
40.7361	7.54
40.7778	7.29
40.8194	7.11
40.8611	6.945
40.9028	6.82
40.9444	6.725
40.9861	6.715
41.0278	6.695
41.0694	6.675
41.1111	6.725
41.1528	6.805
41.1944	6.9
41.2361	6.965
41.2778	7.05
41.3194	7.09
41.3611	7.24
41.4028	7.535
41.4444	7.93
41.4861	8.26
41.5278	8.645
41.5694	8.76
41.6111	8.885
41.6528	8.56
41.6944	8.545
41.7361	8.39
41.7778	8.245
41.8194	8.215
41.8611	8.185
41.9028	8.225
41.9444	8.315
41.9861	8.355
42.0278	8.415
42.0694	8.47
42.1111	8.575
42.1528	8.765
42.1944	8.81
42.2361	8.87
42.2778	8.975
42.3194	9.065
42.3611	9.255
42.4028	9.605
42.4444	9.465
42.4861	9.475
42.5278	9.28
42.5694	9.325
42.6111	9.915
42.6528	10.615
42.6944	9.925
42.7361	9.585
42.7778	9.255
42.8194	9.085
42.8611	9.015
42.9028	9.11
42.9444	9.265
42.9861	9.305
43.0278	9.3
43.0694	9.265
43.1111	9.23
43.1528	9.11
43.1944	8.93
43.2361	8.78
43.2778	8.715
43.3194	8.51
43.3611	8.875
43.4028	10.43
43.4444	12.98
43.4861	12.945
43.5278	12.55
43.5694	14.695
43.6111	17.75
43.6528	13.92
43.6944	11.69
43.7361	10.83
43.7778	9.975
43.8194	9.93
43.8611	9.68
43.9028	9.215
43.9444	9.19
43.9861	9.005
44.0278	8.915
44.0694	8.855
44.1111	8.77
44.1528	8.57
44.1944	8.405
44.2361	8.26
44.2778	8
44.3194	7.83
44.3611	7.785
44.4028	7.645
44.4444	7.77
44.4861	7.835
44.5278	7.885
44.5694	8.01
44.6111	7.93
44.6528	7.57
44.6944	7.3
44.7361	7.165
44.7778	7.08
44.8194	7.085
44.8611	7.045
44.9028	7.005
44.9444	6.91
44.9861	6.81
45.0278	6.825
45.0694	6.75
45.1111	6.635
45.1528	6.515
45.1944	6.32
45.2361	6.095
45.2778	5.595
45.3194	5.135
45.3611	4.88
45.4028	5.035
45.4444	5.255
45.4861	5.5
45.5278	5.94
45.5694	6.095
45.6111	6.425
45.6528	6.675
45.6944	6.745
45.7361	6.805
45.7778	6.785
45.8194	6.785
45.8611	6.74
45.9028	6.505
45.9444	6.23
45.9861	5.835
46.0278	5.615
46.0694	5.425
46.1111	5.165
46.1528	5.08
46.1944	5.035
46.2361	5.04
46.2778	4.975
46.3194	4.975
46.3611	5.16
46.4028	5.665
46.4444	7.21
46.4861	7.14
46.5278	8.62
46.5694	8.22
46.6111	9.86
46.6528	9.615
46.6944	8.065
46.7361	7.005
46.7778	6.7
46.8194	6.5
46.8611	6.27
46.9028	6.285
46.9444	6.285
46.9861	5.88
47.0278	5.43
47.0694	5.595
47.1111	5.18
47.1528	5.48
47.1944	5.585
47.2361	5.825
47.2778	5.95
47.3194	5.73
47.3611	5.99
47.4028	6.28
47.4444	6.99
47.4861	8.075
47.5278	9.35
47.5694	10.405
47.6111	9.505
47.6528	9.7
47.6944	9.04
47.7361	8.33
47.7778	8.03
47.8194	7.895
47.8611	7.835
47.9028	7.815
47.9444	7.68
47.9861	7.51
48.0278	7.315
48.0694	7.185
48.1111	7.115
48.1528	7.075
48.1944	7.02
48.2361	6.865
48.2778	6.73
48.3194	6.575
48.3611	6.5
48.4028	7.8
48.4444	10.145
48.4861	9.065
48.5278	10.775
48.5694	10.345
48.6111	10.82
48.6528	7.345
48.6944	7.17
48.7361	5.435
48.7778	5.835
48.8194	4.915
48.8611	3.28
48.9028	2.35
48.9444	1.775
48.9861	1.365
49.0278	2.64
49.0694	1.94
49.1111	2.625
49.1528	3.05
49.1944	2.785
49.2361	2.035
49.2778	1.145
49.3194	0.875
49.3611	1.685
49.4028	2.905
49.4444	6.54
49.4861	8.5
49.5278	8.105
49.5694	8.37
49.6111	8.78
49.6528	8.165
49.6944	6.965
49.7361	4.87
49.7778	4.72
49.8194	4.495
49.8611	4.6
49.9028	5.2
49.9444	5.43
49.9861	5.645
50.0278	5.705
50.0694	5.885
50.1111	6.005
50.1528	6.185
50.1944	6.34
50.2361	6.575
50.2778	6.87
50.3194	7.065
50.3611	7.4
50.4028	8.24
50.4444	10.18
50.4861	10.955
50.5278	12.895
50.5694	12.965
50.6111	12.05
50.6528	9.74
50.6944	8.535
50.7361	7
50.7778	6.3
50.8194	6.83
50.8611	6.875
50.9028	7.615
50.9444	7.995
50.9861	8.92
51.0278	9.24
51.0694	9.35
51.1111	9.51
51.1528	9.54
51.1944	9.365
51.2361	9.5
51.2778	9.66
51.3194	9.81
51.3611	10.1
51.4028	10.525
51.4444	11.26
51.4861	12.005
51.5278	10.46
51.5694	10.06
51.6111	10.615
51.6528	8.28
51.6944	7.485
51.7361	6.81
51.7778	6.345
51.8194	6.45
51.8611	5.905
51.9028	5.925
51.9444	6.515
51.9861	6.155
52.0278	5.8
52.0694	5.505
52.1111	5.93
52.1528	5.76
52.1944	5.17
52.2361	5.54
52.2778	5.13
52.3194	4.77
52.3611	4.775
52.4028	6.445
52.4444	8.635
52.4861	9.22
52.5278	7.9
52.5694	8.01
52.6111	8.85
52.6528	6.3
52.6944	5.18
52.7361	4.1
52.7778	3.285
52.8194	3.055
52.8611	2.75
52.9028	2.52
52.9444	2.33
52.9861	2.16
53.0278	2.3
53.0694	2.585
53.1111	2.315
53.1111	1.77
53.1528	1.21
53.1944	0.79
53.2361	0.56
53.2778	0.115
53.3194	0.005
53.3611	2.41
53.4028	5.74
53.4444	7.605
53.4861	5.435
53.5278	5.895
53.5694	6.475
53.6111	4.25
53.6528	3.625
53.6944	2.23
53.7361	2.95
53.7778	3.025
53.8194	3.125
53.8611	3.08
53.9028	3.215
53.9444	3.405
53.9861	3.285
54.0278	3.275
54.0694	3.06
54.1111	3.26
54.1528	3.605
54.1944	3.38
54.2361	2.89
54.2778	2.04
54.3194	3.34
54.3611	4.465
54.4028	6.16
54.4444	8.115
54.4861	8.185
54.5278	7.755
54.5694	8.1
54.6111	8.18
54.6528	8.465
54.6944	7.78
54.7361	7.545
54.7778	7.395
54.8194	7.295
54.8611	7.315
54.9028	7.375
54.9444	7.425
54.9861	7.505
55.0278	7.38
55.0694	7.35
55.1111	7.635
55.1528	7.935
55.1944	8.285
55.2361	8.435
55.2778	8.625
55.3194	8.73
55.3611	8.995
55.4028	9.565
55.4444	9.805
55.4861	9.885
55.5278	10.435
55.5694	9.43
55.6111	8.775
55.6528	7.425
55.6944	6.565
55.7361	5.295
55.7778	5.45
55.8194	4.65
55.8611	5.21
55.9028	4.245
55.9444	4.39
55.9861	4.32
56.0278	4.17
56.0694	4.19
56.1111	3.24
56.1528	3.805
56.1944	3.405
56.2361	2.24
56.2778	1.885
56.3194	2.785
56.3611	3.62
56.4028	4.46
56.4444	4.595
56.4861	5.035
56.5278	5.665
56.5694	5.135
56.6111	5
56.6528	4.04
56.6944	2.545
56.7361	1.37
56.7778	1.13
56.8194	0.71
56.8611	0.505
56.9028	0.205
56.9444	0.095
56.9861	-0.04
57.0278	-0.12
57.0694	-0.23
57.1111	-0.33
57.1528	-0.46
57.1944	-0.575
57.2361	-0.725
57.2778	-0.855
57.3194	-0.98
57.3611	-0.21
57.4028	0.77
57.4444	1.205
57.4861	0.245
57.5278	0.38
57.5694	0.405
57.6111	-0.065
57.6528	-0.26
57.6944	-0.375
57.7361	-0.385
57.7778	-0.35
57.8194	-0.225
57.8611	-0.23
57.9028	-0.25
57.9444	-0.325
57.9861	-0.245
58.0278	-0.56
58.0694	-0.195
58.1111	0.025
58.1528	0.155
58.1944	0.185
58.2361	0.21
58.2778	0.235
58.3194	0.275
58.3611	0.52
58.4028	0.645
58.4444	1.045
58.4861	1.585
58.5278	2.515
58.5694	3.595
58.6111	3.705
58.6528	3.49
58.6944	3.195
58.7361	3.33
58.7778	3.79
58.8194	3.955
58.8611	3.965
58.9028	4.035
58.9444	4.005
58.9861	4.06
59.0278	4.115
59.0694	4.18
59.1111	4.265
59.1528	4.445
59.1944	4.62
59.2361	4.755
59.2778	4.86
59.3194	5.02
59.3611	5.195
59.4028	5.72
59.4444	6.93
59.4861	7.12
59.5278	7.385
59.5694	6.965
59.6111	6.45
59.6528	5.665
59.6944	5.22
59.7361	5.06
59.7778	4.975
59.8194	4.87
59.8611	4.83
59.9028	4.655
59.9444	4.685
59.9861	4.655
60.0278	4.495
60.0694	4.365
60.1111	4.27
60.1528	4.085
60.1944	3.85
60.2361	3.635
60.2778	3.52
60.3194	3.405
60.3611	3.315
60.4028	3.31
60.4444	3.77
60.4861	4.82
60.5278	5.08
60.5694	4.605
60.6111	3.92
60.6528	3.07
60.6944	2.53
60.7361	2.125
60.7778	1.885
60.8194	1.545
60.8611	1.01
60.9028	0.955
60.9444	0.685
60.9861	0.68
61.0278	0.555
61.0694	0.445
61.1111	0.385
61.1528	0.26
61.1944	0.24
61.2361	0.235
61.2778	0.195
61.3194	0.185
61.3611	0.33
61.4028	0.625
61.4444	1.94
61.4861	1.295
61.5278	0.505
61.5694	0.04
61.6111	-0.195
61.6528	-0.59
61.6944	-0.885
61.7361	-1.23
61.7778	-1.63
61.8194	-1.33
61.8611	-0.915
61.9028	-1.265
61.9444	-0.93
61.9861	-1.075
62.0278	-1.55
62.0694	-1.395
62.1111	-1.72
62.1528	-2.15
62.1944	-1.785
62.2361	-2.235
62.2778	-3.175
62.3194	-3.45
62.3611	-3.09
62.4028	-1.445
62.4444	-1.225
62.4861	-1.79
62.5278	-1.705
62.5694	-1.215
62.6111	-2.375
62.6528	-2.92
62.6944	-3.26
62.7361	-3.55
62.7778	-3.61
62.8194	-2.66
62.8611	-2.375
62.9028	-2.44
62.9444	-1.845
62.9861	-1.4
63.0278	-1.25
63.0694	-1.265
63.1111	-1.185
63.1528	-1.27
63.1944	-1.105
63.2361	-0.92
63.2778	-0.715
63.3194	-0.55
63.3611	-0.425
63.4028	-0.295
63.4444	-0.24
63.4861	-0.2
63.5278	-0.18
63.5694	-0.17
63.6111	-0.16
63.6528	-0.15
63.6944	-0.155
63.7361	-0.155
63.7778	-0.155
63.8194	-0.15
63.8611	-0.15
63.9028	-0.145
63.9444	-0.14
63.9861	-0.14
64.0278	-0.14
64.0694	-0.135
64.1111	-0.14
64.1528	-0.15
64.1944	-0.17
64.2361	-0.195
64.2778	-0.17
64.3194	-0.155
64.3611	-0.135
64.4028	-0.1
64.4444	-0.095
64.4861	-0.085
64.5278	-0.085
64.5694	-0.075
64.6111	-0.075
64.6528	-0.075
64.6944	-0.08
64.7361	-0.08
64.7778	-0.08
64.8194	-0.12
64.8611	-0.575
64.9028	-0.915
64.9444	-1.085
64.9861	-0.915
65.0278	-1.16
65.0694	-1.08
65.1111	-1.265
65.1528	-1.295
65.1944	-1.065
65.2361	-0.765
65.2778	-1.255
65.3194	-1.4
65.3611	-1.27
65.4028	-0.94
65.4444	-0.83
65.4861	-0.89
65.5278	-0.825
65.5694	-0.94
65.6111	-1.19
65.6528	-1.39
65.6944	-1.52
65.7361	-1.605
65.7778	-1.67
65.8194	-1.78
65.8611	-1.87
65.9028	-1.98
65.9444	-2.08
65.9861	-2.205
66.0278	-2.315
66.0694	-2.4
66.1111	-2.49
66.1528	-2.39
66.1944	-2.57
66.2361	-2.69
66.2778	-2.75
66.3194	-2.81
66.3611	-2.685
66.4028	-2.225
66.4444	-2.215
66.4861	-2.29
66.5278	-2.305
66.5694	-2.245
66.6111	-2.4
66.6528	-2.555
66.6944	-2.735
66.7361	-2.84
66.7778	-2.93
66.8194	-3.005
66.8611	-3.11
66.9028	-3.21
66.9444	-3.23
66.9861	-3.325
67.0278	-3.42
67.0694	-3.465
67.1111	-3.495
67.1528	-3.57
67.1944	-3.62
67.2361	-3.655
67.2778	-3.735
67.3194	-3.79
67.3611	-3.645
67.4028	-3.375
67.4444	-3.125
67.4861	-2.665
67.5278	-1.915
67.5694	-1.735
67.6111	-1.45
67.6528	-2.01
67.6944	-2.5
67.7361	-2.87
67.7778	-3.13
67.8194	-3.14
67.8611	-2.875
67.9028	-3.23
67.9444	-2.89
67.9861	-2.435
68.0278	-2.155
68.0694	-1.935
68.1111	-2.045
68.1528	-2.47
68.1944	-2.665
68.2361	-2.95
68.2778	-3.23
68.3194	-3.01
68.3611	-3.03
68.4028	-2.81
68.4444	-2.12
68.4861	-1.735
68.5278	-1.5
68.5694	-1.305
68.6111	-1.26
68.6528	-1.54
68.6944	-1.35
68.7361	-0.95
68.7778	-0.745
68.8194	-0.63
68.8611	-0.55
68.9028	-0.46
68.9444	-0.31
68.9861	-0.195
69.0278	-0.17
69.0694	-0.125
69.1111	-0.085
69.1528	-0.075
69.1944	-0.065
69.2361	-0.055
69.2778	0.08
69.3194	0.16
69.3611	0.315
69.4028	0.65
69.4444	0.945
69.4861	1.195
69.5278	1.53
69.5694	1.66
69.6111	1.925
69.6528	1.845
69.6944	1.795
69.7361	1.975
69.7778	2.13
69.8194	2.7
69.8611	1.85
69.9028	1.55
69.9444	1.18
69.9861	1.29
70.0278	0.675
70.0694	-0.78
70.1111	-0.455
70.1528	-0.43
70.1944	-0.2
70.2361	-0.04
70.2778	0.005
70.3194	0.09
70.3611	0.565
70.4028	2.025
70.4444	3.395
70.4861	4.17
70.5278	3.605
70.5694	3.365
70.6111	2.295
70.6528	1.995
70.6944	2.155
70.7361	2.64
70.7778	2.82
70.8194	3.21
70.8611	3.26
70.9028	3.765
70.9444	3.5
70.9861	3.47
71.0278	1.865
71.0694	2.35
71.1111	1.47
71.1528	0.005
71.1944	-0.34
71.2361	0.305
71.2778	-0.32
71.3194	-0.205
71.3611	-0.09
71.4028	0.02
71.4444	1.225
71.4861	2.075
71.5278	1.755
71.5694	1.61
71.6111	2.93
71.6528	1.845
71.6944	0.645
71.7361	1.46
71.7778	1.385
71.8194	-0.255
71.8611	1.08
71.9028	-0.005
71.9444	-0.335
71.9861	0.05
72.0278	1.58
72.0694	2.835
72.1111	3.955
72.1528	4.19
72.1944	4.295
72.2361	4.635
72.2778	4.01
72.3194	3.755
72.3611	4.28
72.4028	4.54
72.4444	4.995
72.4861	5.4
72.5278	5.245
72.5694	6.025
72.6111	5.44
72.6528	4.345
72.6944	3.245
72.7361	3.03
72.7778	2.52
72.8194	2.335
72.8611	1.86
72.9028	1.515
72.9444	1.47
72.9861	1.79
73.0278	1.78
73.0694	1.64
73.1111	2.055
73.1528	2.825
73.1944	1.25
73.2361	0.58
73.2778	0.905
73.3194	1.595
73.3611	0.835
73.4028	2.385
73.4444	2.985
73.4861	2.755
73.5278	3.035
73.5694	3.27
73.6111	2.39
73.6528	1.305
73.6944	-0.095
73.7361	0.47
73.7778	0.805
73.8194	0.94
73.8611	0.91
73.9028	1.795
73.9444	0.67
73.9861	1.255
74.0278	-0.055
74.0694	-0.335
74.1111	-0.225
74.1528	0.065
74.1944	0.155
74.2361	0.055
74.2778	-0.09
74.3194	-0.6
74.3611	-0.135
74.4028	0.105
74.4444	0.69
74.4861	1.64
74.5278	2.855
74.5694	3.27
74.6111	3.49
74.6528	3.39
74.6944	3.735
74.7361	4.05
74.7778	4.515
74.8194	4.325
74.8611	4.505
74.9028	4.875
74.9444	4.435
74.9861	5.605
75.0278	5.83
75.0694	5.495
75.1111	4.81
75.1528	5.07
75.1944	4.415
75.2361	3.755
75.2778	4.015
75.3194	4.065
75.3611	4.975
75.4028	4.605
75.4444	6.72
75.4861	7.665
75.5278	7.525
75.5694	7.63
75.6111	6.665
75.6528	5.76
75.6944	5.295
75.7361	4.64
75.7778	4.75
75.8194	4.615
75.8611	4.565
75.9028	4.34
75.9444	4.835
75.9861	4.27
76.0278	5.135
76.0694	6.07
76.1111	6.495
76.1528	6.705
76.1944	6.665
76.2361	6.555
76.2778	5.6
76.3194	4.17
76.3611	4.745
76.4028	5.54
76.4444	6.845
76.4861	7.245
76.5278	7.805
76.5694	7.555
76.6111	7.02
76.6528	6.035
76.6944	5.8
76.7361	5.665
76.7778	5.415
76.8194	5.29
76.8611	5.125
76.9028	4.84
76.9444	5.085
76.9861	5.125
77.0278	4.975
77.0694	4.71
77.1111	4.835
77.1528	4.745
77.1944	4.53
77.2361	4.6
77.2778	4.505
77.3194	4.155
77.3611	3.345
77.4028	4.44
77.4444	6.315
77.4861	5.725
77.5278	5.68
77.5694	5.155
77.6111	5.315
77.6528	4.995
77.6944	5.21
77.7361	5.185
77.7778	5.225
77.8194	4.54
77.8611	4.455
77.9028	3.805
77.9444	4.54
77.9861	4.64
78.0278	2.96
78.0694	1.96
78.1111	1.475
78.1528	1.05
78.1944	0.67
78.2361	0.47
78.2778	-0.05
78.3194	0.145
78.3611	0.13
78.4028	0.165
78.4444	0.505
78.4861	1.08
78.5278	1.3
78.5694	1.665
78.6111	2.505
78.6528	1.74
78.6944	2.645
78.7361	1.675
78.7778	1.625
78.8194	0.945
78.8611	0.89
78.9028	1.295
78.9444	1.63
78.9861	-0.315
79.0278	-0.055
79.0694	-0.415
79.1111	-0.52
79.1528	-0.645
79.1944	-0.675
79.2361	-0.74
79.2778	-0.75
79.3194	-0.555
79.3611	0.025
79.4028	0.315
79.4444	0.945
79.4861	1.595
79.5278	2.48
79.5694	4.725
79.6111	4.335
79.6528	2.54
79.6944	1.28
79.7361	1.115
79.7778	1.025
79.8194	1.965
79.8611	2.16
79.9028	2.24
79.9444	2.015
79.9861	2.23
80.0278	2.46
80.0694	3.005
80.1111	3.62
80.1528	3.93
80.1944	4.145
80.2361	4.33
80.2778	4.455
80.3194	4.605
80.3611	4.87
80.4028	5.395
80.4444	6.58
80.4861	7.025
80.5278	8.315
80.5694	8.06
80.6111	7.605
80.6528	6.805
80.6944	6.25
80.7361	5.975
80.7778	5.58
80.8194	4.605
80.8611	3.175
80.9028	2.305
80.9444	1.72
80.9861	1.32
81.0278	0.94
81.0694	0.7
81.1111	0.37
81.1528	-0.01
81.1944	-0.47
81.2361	-0.08
81.2778	-0.41
81.3194	-0.465
81.3611	-0.375
81.4028	-0.24
81.4444	0.035
81.4861	-0.065
81.5278	-0.04
81.5694	-0.175
81.6111	-0.395
81.6528	-0.59
81.6944	-0.795
81.7361	-0.97
81.7778	-0.935
81.8194	-1.025
81.8611	-1.165
81.9028	-1.3
81.9444	-1.45
81.9861	-1.575
82.0278	-1.72
82.0694	-1.75
82.1111	-1.865
82.1528	-2.05
82.1944	-2.225
82.2361	-2.4
82.2778	-2.51
82.3194	-2.695
82.3611	-2.665
82.4028	-2.335
82.4444	-1.835
82.4861	-1.935
82.5278	-1.94
82.5694	-2.16
82.6111	-2.51
82.6528	-2.88
82.6944	-3.205
82.7361	-3.15
82.7778	-3.1
82.8194	-3.04
82.8611	-2.89
82.9028	-2.475
82.9444	-2.15
82.9861	-1.915
83.0278	-1.785
83.0694	-1.595
83.1111	-1.48
83.1528	-1.4
83.1944	-1.29
[truncated: 4,110 more rows]
