# Supplementary material for: Natural variation in autumn expression is the major adaptive determinant distinguishing Arabidopsis FLC haplotypes
Source: eLife. 2020 Sep 9;9:e57671. doi: 10.7554/eLife.57671 (PMC7518893; doi:10.7554/eLife.57671)
Supplement: Source data 2. [file elife-57671-data2.xlsx]

## Sheet: Key
Columns			Genotype				Amplicons
Gen	Genotype		BRO	Bro 1-6	Bro1-6		PP2A	At1g13320
Block	Randomisation block		COL	Col-O	Col-0		UBC	At5g25760
sampling	Number of timepoint at which plants sampled/conditions (e.g. 1 - first sampling, 22C 13WT10 - plants transferred after 13 weeks in field glasshouse (13W) to 22°C long-day glasshouse [or 8C = 8°C long day cabinet] for 10 days (T10)		EDI	Edi-O	Edi-0		FLC	spliced At5g10140
Timepoint	Days after sowing in field		EDIN		Edi NIL		UNF	unspliced At5g10140
Timepoint_Cold	Days after sowing in field or cold cabinet		FCA		fca-9 fri		VIN3	At5g57380
Rep	Replicate number		FLD		fld-4 fri
tissueCode	Individual sample code		FVE		fve-3 fri
plateCode	Sample plate and QPCR plate code		LOV	Lov-1	Löv-1
efficiency_amplicon	QPCR plate-specific amplicon efficiency output from LinReg		NDX		ndx1-1 FRI
Amplicon_N0	N0 expression level per sample output (from LinReg)		NIL1	LovA	Lov NIL1
geoMean	geometric mean of PP2A_N0 and UBC_N0		NIL2	Lov intro	Lov NIL2
Flag	Flag for high UBC control levels or non-detectable amplicons		SF2	Col FRI(sf2)	Col FRI
Amplicon	Amplicon corrected to sample geometric mean of controls		ULL	Ull 2-5	Ull2-5
Amplicon_plCtrl	QPCR plate-specific amplicon value for control sample		VAR	Var 2-6	Var2-6
Amplicon_plateCorrected	Sample amplicon corrected to plate-specific control value		VARN		Var NIL
notes	notes from time of sampling		VIN3		vin3-4 FRI
planting	A - North Sweden first planting, B- North Sweden second planting, C - South Sweden		VRN1		vrn1-4 FRI
plantingName	as above		VRN2		vrn2-1 FRI
pos	position in tray

## Sheet: Norwich_14
Gen	Block	sampling	Timepoint	Timepoint_Cold	Rep	tissueCode	plateCode	efficiency_PP2A	efficiency_UBC	efficiency_FLC	efficiency_UNF	efficiency_VIN3	PP2A_N0	UBC_N0	FLC_N0	UNF_N0	VIN3_N0	geoMean	Flag	PP2A	UBC	FLC	UNF	VIN3	FLC_plCtrl	FLC_plateCorrected	UNF_plCtrl	UNF_plateCorrected	PP2A_plCtrl	PP2A_plateCorrected	UBC_plCtrl	UBC_plateCorrected	VIN3_plCtrl	VIN3_plateCorrected
BRO	1	1	9	9	1	111BRO	006FP3	1.87135	1.88785	1.86674	1.72318	1.88094	6.5e-09	2.08e-08	5.49e-08	1.44e-08	2.96e-10	1.16e-08	Bad UBC	0.560442	1.79078	4.73615	1.24144	0.0254789	2.43184	1.94756	0.367617	3.377	3.40765	0.164466	1.5644	1.14471	1.03782	0.0245503
BRO	3	1	9	9	1	B5	007 008 FP1	1.87329	1.89506	1.87916	1.73378	1.87786	1.7e-09	7.75e-09	1.62e-09	1.41e-09	1.28e-10	3.63e-09	Bad UBC	0.468031	2.13661	0.447577	0.387865	0.0352722	0.982724	0.455445	0.181607	2.13574	1.17757	0.397456	0.849207	2.516	0.514649	0.0685364
BRO	1	1	9	9	2	112BRO	009FP1	1.868	1.8849	1.87638	1.74067	1.84771	8.05e-08	8.75e-08	2.71e-07	6.52e-08	1.89e-09	8.2e-08	NaN	0.981623	1.06758	3.3058	0.795187	0.0230154	0.841732	3.92737	0.0920425	8.63934	1.08201	0.907218	0.963693	1.1078	0.507846	0.0453197
BRO	2	1	9	9	2	212BRO	010FP1	1.8647	1.8809	1.87955	1.72822	1.85484	4.56e-08	4.95e-08	2.16e-07	4.07e-08	1.67e-10	4.75e-08	NaN	0.961492	1.0421	4.54652	0.857944	0.00352333	0.714524	6.36301	0.110966	7.73158	1.045	0.920089	1.0011	1.04095	0.484065	0.00727862
BRO	3	1	9	9	2	312BRO	011FP1	1.875	1.88906	1.8814	1.72278	1.84935	2.47e-08	3.95e-08	1.25e-07	2.23e-08	1.13e-10	3.09e-08	NaN	0.799493	1.27715	4.04585	0.720086	0.00363767	0.780389	5.1844	0.143972	5.00155	1.28092	0.624156	0.830475	1.53786	0.596948	0.00609378
BRO	1	2	16	16	1	121BRO	001FP1	1.86774	1.90213	1.87451	1.71119	1.84445	1.03e-08	9.53e-09	4.78e-08	8.58e-09	3.38e-10	9.89e-09	Bad UBC, order of magnitude (VIN3)	1.03901	0.963928	4.83611	0.867648	0.0341915	NaN	NaN	NaN	NaN	NaN	NaN	NaN	NaN	NaN	NaN
BRO	2	2	16	16	1	221BRO	001FP2	1.86641	1.8869	1.86963	1.74128	1.85735	7.44e-07	5.18e-07	1.43e-06	8.39e-08	2.57e-09	6.15e-07	NaN	1.2102	0.842418	2.33246	0.136467	0.00417337	0.82159	2.83896	0.0913827	1.49336	1.17879	1.02665	0.907243	0.928547	0.492102	0.0084807
BRO	3	2	16	16	1	321BRO	001FP2	1.86641	1.8869	1.86963	1.74128	1.85735	3.36e-10	1.06e-09	8.54e-10	3.85e-11	1.09e-10	5.94e-10	Bad UBC, order of magnitude (VIN3)	0.565941	1.77712	1.43704	0.0648936	0.183964	NaN	NaN	NaN	NaN	NaN	NaN	NaN	NaN	NaN	NaN
BRO	2	2	16	16	2	222BRO	009FP1	1.868	1.8849	1.87638	1.74067	1.84771	7.78e-07	4.36e-07	1.24e-06	9.75e-08	2e-09	5.71e-07	NaN	1.36249	0.762749	2.17522	0.170706	0.00350673	0.841732	2.58421	0.0920425	1.85465	1.08201	1.25922	0.963693	0.791486	0.507846	0.00690512
BRO	3	2	16	16	2	322BRO	010FP2	1.87255	1.89381	1.86992	1.73219	1.84777	3.16e-07	1.6e-07	3.91e-07	8.9e-08	1.24e-09	2.24e-07	NaN	1.40758	0.715172	1.74235	0.396547	0.00551116	1.44712	1.20402	0.202229	1.96089	1.71879	0.818936	0.645878	1.10729	0.919584	0.0059931
BRO	1	2	16	16	2	122BRO	012FP1	1.88099	1.89659	1.87632	1.72076	1.85176	2.15e-06	1.05e-06	3.46e-06	4.62e-07	7.81e-09	1.51e-06	NaN	1.43026	0.699596	2.29824	0.30691	0.00518715	0.784247	2.9305	0.146598	2.09354	1.05045	1.36157	0.966884	0.723558	0.531422	0.00976089
BRO	1	5	37	37	1	151BRO	002FP3	1.88057	1.90335	1.89829	1.7732	1.88871	3.59e-07	1.77e-07	3.29e-07	3.48e-08	4.29e-08	2.48e-07	NaN	1.44524	0.714722	1.32493	0.140316	0.173027	0.69207	1.91444	0.0619552	2.2648	1.04029	1.38927	0.981386	0.728279	0.33273	0.520024
BRO	3	5	37	37	1	251BRO	002FP3	1.88057	1.90335	1.89829	1.7732	1.88871	7.29e-07	3.16e-07	6.13e-07	4.66e-08	1.97e-08	4.67e-07	NaN	1.56017	0.676998	1.31212	0.0997974	0.042116	0.69207	1.89593	0.0619552	1.6108	1.04029	1.49975	0.981386	0.689839	0.33273	0.126577
BRO	2	5	37	37	1	E1	003 007 FP1	1.87329	1.89506	1.87916	1.73378	1.87786	3.97e-07	1.11e-07	3.55e-07	5.03e-08	1.04e-08	2.1e-07	NaN	1.88854	0.529511	1.69128	0.239431	0.0494426	0.982724	1.72101	0.181607	1.3184	1.17757	1.60376	0.849207	0.623535	0.514649	0.0960706
BRO	1	5	37	37	2	152BRO	010FP2	1.87255	1.89381	1.86992	1.73219	1.84777	7.89e-07	6.66e-07	9.6e-07	3.02e-07	3.63e-08	7.22e-07	NaN	1.09239	0.921825	1.32939	0.418689	0.0502825	1.44712	0.918643	0.202229	2.07037	1.71879	0.635558	0.645878	1.42724	0.919584	0.0546796
BRO	3	5	37	37	2	252BRO	011FP3	1.88881	1.88016	1.85109	1.72167	1.88629	2.45e-07	2.4e-07	9.32e-07	6.93e-08	5.69e-09	2.39e-07	NaN	1.02337	1.00268	3.89489	0.289841	0.0237827	1.26525	3.07834	0.146125	1.98351	1.02585	0.997581	1.00505	0.997642	0.359094	0.0662298
BRO	2	5	37	37	2	352BRO	012FP3	1.8895	1.90192	1.85731	1.72452	1.89094	5.94e-07	2.68e-07	1.94e-06	2.25e-07	8.94e-09	3.96e-07	NaN	1.49867	0.677333	4.88889	0.568802	0.0225569	1.17866	4.14783	0.176063	3.23068	1.0656	1.40641	0.963561	0.702948	0.358734	0.0628793
BRO	2	7	51	51	1	B3	003 007 FP1	1.87329	1.89506	1.87916	1.73378	1.87786	3.34e-08	3.41e-08	5.48e-08	4.6e-09	2.33e-09	3.37e-08	NaN	0.990107	1.00999	1.62575	0.136334	0.0690439	0.982724	1.65433	0.181607	0.750712	1.17757	0.840807	0.849207	1.18933	0.514649	0.134157
BRO	1	7	51	51	1	H3	003 007 FP1	1.87329	1.89506	1.87916	1.73378	1.87786	1.88e-08	4.09e-08	3.34e-08	3.96e-09	5.1e-10	2.77e-08	NaN	0.678375	1.47411	1.20457	0.142876	0.0183839	0.982724	1.22575	0.181607	0.786734	1.17757	0.576081	0.849207	1.73587	0.514649	0.0357213
BRO	3	7	51	51	2	372BRO	016FP7	1.89644	1.88728	1.89109	1.70604	1.89299	1.84e-08	3.65e-08	6.36e-08	2.32e-08	5.98e-09	2.59e-08	NaN	0.712727	1.41129	2.45954	0.896844	0.231415	0.661754	3.71669	0.145177	6.17757	0.87103	0.818257	1.21042	1.16595	0.287181	0.805816
BRO	1	7	51	51	2	172BRO	019FP7	1.88187	1.90044	1.90038	1.72628	1.91807	1.33e-06	6.38e-07	1.26e-06	5.8e-08	7.31e-08	9.12e-07	NaN	1.46366	0.699784	1.38441	0.0635716	0.08018	0.825716	1.67661	0.149663	0.424766	1.12108	1.30558	0.894724	0.782123	0.286746	0.279621
BRO	2	7	51	51	2	272BRO	020FP2	1.90785	1.89962	1.88201	1.68971	1.90013	2.99e-07	1.76e-07	3.58e-07	6.51e-08	3.51e-08	2.26e-07	NaN	1.32169	0.778569	1.58432	0.288152	0.155286	1.25034	1.26712	0.3489	0.825887	0.987811	1.338	1.02211	0.761729	0.418299	0.371233
BRO	1	9	65	65	1	191BRO	004FP1	1.86813	1.89054	1.87135	1.70021	1.87385	5.96e-07	4.67e-07	6.71e-07	8.47e-08	4.49e-07	5.14e-07	NaN	1.15979	0.908523	1.30612	0.164763	0.873448	0.876494	1.49017	0.227034	0.72572	1.11778	1.03759	0.921858	0.985535	0.389836	2.24056
BRO	2	9	65	65	1	291BRO	004FP2	1.87305	1.89591	1.87559	1.74662	1.87864	1.43e-06	1.12e-06	2.49e-06	2e-07	1.297e-06	1.24e-06	NaN	1.14824	0.896145	1.99967	0.160989	1.04188	1.28987	1.55028	0.0723901	2.22391	1.02024	1.12545	0.833748	1.07484	0.240781	4.32709
BRO	3	9	65	65	1	391BRO	004FP2	1.87305	1.89591	1.87559	1.74662	1.87864	1.05e-06	8.86e-07	2.06e-06	8.41e-08	6.84e-07	9.59e-07	NaN	1.09539	0.923484	2.1454	0.0876777	0.713673	1.28987	1.66327	0.0723901	1.21118	1.02024	1.07366	0.833748	1.10763	0.240781	2.96399
BRO	1	9	65	65	2	192BRO	013FP2	1.89904	1.90271	1.9034	1.70761	1.889	3.57e-07	3.62e-07	4.91e-07	5.4e-08	4.42e-07	3.58e-07	NaN	0.995538	1.01057	1.36954	0.150836	1.23481	0.764524	1.79136	0.233327	0.646459	0.946251	1.05209	1.13119	0.893364	0.356246	3.46618
BRO	3	9	65	65	2	392BRO	014FP6	1.90482	1.89972	1.87325	1.71499	1.87892	4.78e-07	3.98e-07	9.66e-07	6.8e-08	5.41e-07	4.29e-07	NaN	1.11327	0.92703	2.24988	0.15844	1.26008	1.34073	1.67809	0.204391	0.775178	1.03993	1.07052	1.03698	0.893975	0.581865	2.16558
BRO	2	9	65	65	2	292BRO	015FP2	1.90353	1.89417	1.87892	1.71913	1.89298	1.32e-06	8.18e-07	1.47e-06	3.02e-07	5.6e-07	1.03e-06	NaN	1.28029	0.792085	1.4263	0.292493	0.54214	1.04908	1.35957	0.205684	1.42205	1.0516	1.21747	0.968382	0.817947	0.366226	1.48034
BRO	1	11	79	79	1	1111BRO	006FP3	1.87135	1.88785	1.86674	1.72318	1.88094	1.11e-06	8.67e-07	2.22e-07	3.64e-08	8.46e-07	9.6e-07	NaN	1.16047	0.90234	0.231272	0.0379212	0.881275	2.43184	0.0951019	0.367617	0.103154	3.40765	0.340548	1.5644	0.576797	1.03782	0.849156
BRO	3	11	79	79	1	E4	007 008 FP4	1.766	2.023	2.023	1.205	2.5	4.07e-06	4.21e-06	9.29e-07	1.03e-07	3.03e-06	4.14e-06	NaN	0.983166	1.01712	0.224407	0.0249587	0.732102	0.915093	0.245228	0.0815395	0.306093	0.901006	1.09119	1.10987	0.916434	0.46306	1.58101
BRO	2	11	79	79	1	F1	007 008 FP4	1.766	2.023	2.023	1.205	2.5	1.54e-06	1.04e-06	2.92e-07	4.16e-08	1.31e-06	1.27e-06	NaN	1.21561	0.822635	0.231089	0.0328489	1.03145	0.915093	0.25253	0.0815395	0.402859	0.901006	1.34916	1.10987	0.741199	0.46306	2.22747
BRO	1	11	79	79	2	1112BRO	013FP3	1.88302	1.89314	1.87306	1.73979	1.88581	2.28e-06	1.77e-06	4.26e-07	1.97e-08	9.04e-07	1.94e-06	NaN	1.17626	0.915824	0.219729	0.0101849	0.466578	0.866381	0.253617	0.096316	0.105744	0.939115	1.25252	1.16709	0.78471	0.242664	1.92273
BRO	3	11	79	79	2	3112BRO	014FP4	1.87992	1.91971	1.87856	1.70837	1.88699	1.49e-06	7.82e-07	5.69e-07	9.24e-08	7.14e-07	1.04e-06	NaN	1.43501	0.751981	0.546919	0.0887741	0.685893	1.09719	0.498473	0.241073	0.368246	1.21167	1.18433	0.869193	0.865149	0.360863	1.9007
BRO	2	11	79	79	2	2112BRO	015FP3	1.89281	1.89762	1.89592	1.71722	1.92113	1.45e-06	1.13e-06	3.67e-07	3.53e-08	7.78e-07	1.26e-06	NaN	1.14928	0.89157	0.290255	0.0279485	0.615634	0.898213	0.323147	0.195903	0.142665	1.17831	0.975358	0.874314	1.01974	0.28899	2.13029
BRO	3	14	114	114	2	3142BRO	015FP2	1.90353	1.89417	1.87892	1.71913	1.89298	6.72e-07	1.03e-06	5.25e-08	3.7e-09	1.01e-06	8.17e-07	NaN	0.822425	1.26185	0.0642968	0.00452545	1.24263	1.04908	0.0612889	0.205684	0.022002	1.0516	0.782072	0.968382	1.30305	0.366226	3.39308
BRO	1	14	114	114	1	1141BRO	016FP1	1.86993	1.90488	1.87282	1.61217	1.88073	4e-07	5.7e-07	5.85e-08	1.39e-08	5.37e-07	4.66e-07	NaN	0.858545	1.22501	0.125703	0.0297545	1.15405	0.841387	0.1494	1.23341	0.0241237	1.11887	0.76733	0.887676	1.38001	0.360456	3.20163
BRO	2	14	114	114	1	2141BRO	017FP2	1.88289	1.8966	1.87626	1.68928	1.90023	1.17e-07	1.31e-07	7.28e-09	1.6e-09	1.88e-07	1.23e-07	NaN	0.952259	1.06545	0.0589946	0.0129436	1.52588	1.07709	0.0547723	0.291836	0.0443523	1.1308	0.842111	0.896035	1.18907	0.346238	4.40704
BRO	3	14	114	114	1	3141BRO	018FP1	1.87818	1.88808	1.8758	1.73444	1.88665	4.88e-07	3.9e-07	3.36e-08	5.08e-10	5.64e-07	4.32e-07	NaN	1.12829	0.901868	0.0778007	0.00117581	1.30518	0.884537	0.0879565	0.115537	0.0101769	1.0584	1.06603	0.897426	1.00495	0.344665	3.78683
BRO	1	14	114	114	2	1142BRO	019FP3	1.89621	1.89562	1.88374	1.70489	1.9038	7.3e-07	5.9e-07	1.56e-08	1.59e-09	5.07e-07	6.49e-07	NaN	1.12606	0.909225	0.0240421	0.00244864	0.781679	1.05274	0.0228376	0.249768	0.00980366	1.07757	1.045	0.937987	0.969336	0.358514	2.18033
BRO	2	14	114	114	2	2142BRO	020FP3	1.8778	1.90697	1.86206	1.71413	1.91182	1.54e-06	6.82e-07	3.58e-08	4.35e-09	1.14e-06	1.01e-06	NaN	1.52201	0.675476	0.0354517	0.00431012	1.12404	1.48009	0.0239525	0.190239	0.0226564	1.2726	1.19599	0.79661	0.847938	0.297273	3.78117
BRO	2	15	128	128	1	2151BRO	014FP1	1.89092	1.8987	1.87583	1.68581	1.89428	5.07e-07	5.03e-07	7.7e-09	1.15e-09	5.69e-07	4.94e-07	NaN	1.02644	1.01847	0.0156005	0.00232731	1.15189	1.19098	0.0130989	0.405493	0.00573945	1.29674	0.791549	0.844208	1.20642	0.417674	2.75786
BRO	3	15	128	128	1	3151BRO	015FP1	1.88579	1.88749	1.87612	1.70145	1.88913	8.23e-07	4.32e-07	1.99e-08	2.24e-09	9.96e-07	5.95e-07	NaN	1.38394	0.726343	0.0334461	0.00377306	1.67495	1.15935	0.0288489	0.301099	0.012531	1.24228	1.11403	0.860931	0.843672	0.463419	3.61433
BRO	2	15	128	128	2	2152BRO	017FP3	1.87941	1.89809	1.85559	1.70262	1.89286	6.86e-07	5.98e-07	1.37e-08	2.85e-10	5.38e-07	6.29e-07	NaN	1.09044	0.950413	0.0218154	0.00045223	0.855301	1.42603	0.015298	0.239244	0.00189025	1.16481	0.936151	0.874626	1.08665	0.398456	2.14654
BRO	3	15	128	128	2	3152BRO	018FP7	1.8863	1.89323	1.88903	1.71439	1.89462	7.05e-07	6.98e-07	1.07e-08	9.74e-09	1.5e-06	6.89e-07	NaN	1.02433	1.01425	0.0155673	0.0141435	2.17506	0.943137	0.0165059	0.184797	0.0765352	1.03835	0.986504	0.965986	1.04996	0.390366	5.57184
BRO	1	15	128	128	2	1152BRO	020FP3	1.8778	1.90697	1.86206	1.71413	1.91182	9.59e-07	7.38e-07	2.66e-08	2.05e-09	8.04e-07	8.19e-07	NaN	1.17131	0.900856	0.0325066	0.00250697	0.982631	1.48009	0.0219626	0.190239	0.013178	1.2726	0.92041	0.79661	1.13086	0.297273	3.30549
BRO	1	13	100	100	1	1131BRO	004FP3	1.87999	1.89718	1.86015	1.72219	1.88538	1.2e-06	7.3e-07	1.07e-07	4.41e-09	1.65e-06	9.17e-07	NaN	1.3037	0.796051	0.116449	0.00480876	1.80184	1.28987	0.0902795	0.179254	0.0268265	1.25463	1.03911	0.833748	0.954787	0.413129	4.36145
BRO	2	13	100	100	1	2131BRO	005FP1	1.87074	1.88866	1.86393	1.73025	1.87136	1.32e-06	1.79e-06	3.37e-07	3.21e-08	2.3e-06	1.51e-06	NaN	0.872216	1.186	0.223151	0.021283	1.52351	0.87872	0.25395	0.123899	0.171778	0.989991	0.881034	1.01214	1.17177	0.335857	4.53618
BRO	3	13	100	100	1	3131BRO	005FP2	1.87738	1.895	1.87672	1.73259	1.86768	1e-06	9.25e-07	2.24e-07	1.2e-08	1.14e-06	9.23e-07	NaN	1.08835	1.00198	0.242353	0.0129705	1.2321	0.850419	0.284981	0.142996	0.0907051	1.08724	1.00102	0.937791	1.06845	0.424808	2.90037
BRO	2	13	100	100	2	2132BRO	017FP2	1.88289	1.8966	1.87626	1.68928	1.90023	5.65e-07	5.13e-07	5.34e-08	7.93e-09	1.08e-06	5.32e-07	NaN	1.06193	0.964166	0.100353	0.014897	2.0349	1.07709	0.0931706	0.291836	0.0510457	1.1308	0.939096	0.896035	1.07604	0.346238	5.87717
BRO	3	13	100	100	2	3132BRO	018FP2	1.88126	1.88502	1.87016	1.68571	1.89438	3.39e-07	2.62e-07	8.72e-08	1.22e-08	6.17e-07	2.97e-07	NaN	1.14142	0.880804	0.29309	0.0409692	2.07294	1.1424	0.256556	0.29813	0.137421	1.16813	0.977136	0.866349	1.01669	0.404033	5.13063
BRO	1	13	100	100	2	1132BRO	019FP3	1.89621	1.89562	1.88374	1.70489	1.9038	1.82e-07	2.2e-07	2.76e-08	6.64e-09	4.15e-07	1.98e-07	NaN	0.919619	1.11422	0.139425	0.033608	2.10133	1.05274	0.13244	0.249768	0.134557	1.07757	0.853417	0.937987	1.18788	0.358514	5.86122
BRO	3	17	156	156	1	3171 BRO	T17 FP3	1.87141	1.85894	1.87842	1.70743	1.8995	1.14e-06	8.71e-07	3.58e-09	1.28e-09	4.73e-07	9.98e-07	NaN	1.14503	0.873336	0.00358448	0.00128441	0.474003	0.995003	0.00360248	0.154747	0.00830005	1.11643	1.02562	0.895712	0.975018	0.26627	1.78016
BRO	1	17	156	156	2	1172 BRO	T17 FP3	1.87141	1.85894	1.87842	1.70743	1.8995	4.08e-07	2.57e-07	1.57e-09	1.46e-09	1.03e-07	3.24e-07	NaN	1.2613	0.792836	0.00484647	0.00451187	0.317499	0.995003	0.00487081	0.154747	0.0291564	1.11643	1.12976	0.895712	0.885145	0.26627	1.1924
BRO	2	17	156	156	2	2172 BRO	T17 FP4	1.88299	1.87427	1.85002	1.70246	1.88145	9.1e-07	5.86e-07	2.57e-09	NaN	4.64e-07	7.31e-07	NaN	1.24567	0.802783	0.00352074	NaN	0.63522	1.50587	0.00233801	0.211762	NaN	1.01314	1.22952	0.987035	0.813328	0.357668	1.776
BRO	3	17	156	156	2	3172 BRO	T17 FP5	1.8793	1.89836	1.8706	1.69511	1.88532	1.38e-06	4.41e-07	2.03e-09	1.85e-09	3.58e-07	7.8e-07	NaN	1.76787	0.565652	0.00261051	0.00237895	0.459103	0.856659	0.00304731	0.208815	0.0113926	1.02319	1.72781	0.977339	0.578768	0.261137	1.75809
BRO	22	22C 13WT10	110	100	2	F7	003 007 FP2	2.123	2.1085	2.249	1.432	2.421	NaN	1.82e-06	8.69e-08	5.5e-09	4.59e-08	NaN	NaN	NaN	NaN	NaN	NaN	NaN	0.892497	NaN	0.051175	NaN	1.01475	NaN	0.985468	NaN	0.362457	NaN
BRO	22	22C 13WT10	110	100	1	13WT10221BRO	006FP2	1.88265	1.89284	1.87491	1.75695	1.87568	3.13e-06	1.28e-06	7.74e-08	5.3e-09	1.63e-07	1.99e-06	NaN	1.57258	0.644267	0.0389617	0.00266842	0.082079	0.865121	0.0450361	0.0688171	0.0387756	1.00911	1.55839	0.999189	0.64479	0.389581	0.210685
BRO	22	22C 13WT35	135	100	2	13WT3522CBRO2	017FP1	1.87546	1.88935	1.87213	1.69524	1.8794	2.17e-07	2.3e-07	1.5e-08	9.27e-09	5.35e-08	2.23e-07	NaN	0.974288	1.03205	0.0672275	0.0416347	0.240492	1.0257	0.0655433	0.246117	0.169166	1.18187	0.824359	0.843762	1.22316	0.443765	0.541935
BRO	22	22C 13WT35	135	100	3	13WT3522CBRO3	017FP1	1.87546	1.88935	1.87213	1.69524	1.8794	2.87e-07	3.82e-07	1.48e-08	2.24e-09	9.34e-09	3.29e-07	NaN	0.871322	1.16008	0.0449877	0.00679606	0.0283628	1.0257	0.0438606	0.246117	0.0276131	1.18187	0.737238	0.843762	1.37489	0.443765	0.0639141
BRO	22	22C 8WT10	75	65	2	8WT10222BRO	005FP2	1.87738	1.895	1.87672	1.73259	1.86768	8.92e-08	1.34e-07	1.51e-07	1e-08	4.37e-09	1.05e-07	NaN	0.850512	1.28031	1.44382	0.0955299	0.0416269	0.850419	1.69778	0.142996	0.668058	1.08724	0.782267	0.937791	1.36524	0.424808	0.0979898
BRO	22	22C 8WT10	75	65	1	8WT10221BRO	005FP3	1.86287	1.89244	1.86343	1.73985	1.84872	3.87e-07	4.15e-07	2.75e-08	1.71e-09	1.45e-08	3.94e-07	NaN	0.981337	1.05255	0.0698868	0.00434895	0.0367727	0.90024	0.0776313	0.110318	0.0394218	1.19392	0.821946	0.864443	1.2176	0.476702	0.0771398
BRO	22	22C 8WT10	75	65	3	8WT10223BRO	006FP1	1.87535	1.8943	1.86145	1.71724	1.85957	4.98e-08	3.12e-08	6.33e-08	5.63e-09	1.61e-09	3.91e-08	NaN	1.27221	0.797449	1.61731	0.143744	0.0412489	1.07759	1.50086	0.164461	0.874032	1.2976	0.980439	0.810554	0.983833	0.573216	0.0719605
BRO	22	22C 8WT35	100	65	1	8WT3522CBRO1	016FP1	1.86993	1.90488	1.87282	1.61217	1.88073	3.79e-07	3.55e-07	1.71e-07	2.25e-07	7.11e-09	3.49e-07	NaN	1.08395	1.01565	0.488473	0.645034	0.0203385	0.841387	0.580556	1.23341	0.522967	1.11887	0.968789	0.887676	1.14416	0.360456	0.0564245
BRO	22	22C 8WT35	100	65	2	8WT3522CBRO2	016FP1	1.86993	1.90488	1.87282	1.61217	1.88073	1.1e-08	9.74e-09	9.83e-09	7.42e-09	1.33e-09	1.03e-08	Bad UBC	1.07414	0.947199	0.956307	0.721077	0.129423	0.841387	1.13658	1.23341	0.584619	1.11887	0.960023	0.887676	1.06705	0.360456	0.359054
BRO	22	22C 8WT35	100	65	3	8WT3522CBRO3	016FP1	1.86993	1.90488	1.87282	1.61217	1.88073	4.34e-07	5.21e-07	3.35e-07	2.87e-07	2.77e-09	4.63e-07	NaN	0.937208	1.12573	0.722631	0.619589	0.00597342	0.841387	0.858856	1.23341	0.502337	1.11887	0.837636	0.887676	1.26818	0.360456	0.0165719
BRO	2	3	23	23	1	231BRO	002FP1	1.87608	1.89537	1.88205	1.72199	1.8543	2.35e-07	1.93e-07	5.89e-07	3.92e-08	1.59e-09	2.12e-07	NaN	1.10759	0.912652	2.78161	0.184832	0.00749204	0.75207	3.69861	0.1661	1.11278	1.07309	1.03215	0.946048	0.9647	0.564559	0.0132706
BRO	3	3	23	23	1	331BRO	002FP1	1.87608	1.89537	1.88205	1.72199	1.8543	3.84e-07	3.28e-07	8.91e-07	6.97e-08	4.45e-09	3.47e-07	NaN	1.10483	0.94507	2.56399	0.200591	0.0127989	0.75207	3.40925	0.1661	1.20765	1.07309	1.02958	0.946048	0.998966	0.564559	0.0226706
BRO	3	3	23	23	2	332BRO	009FP2	1.86867	1.88053	1.87899	1.73996	1.85198	4.3e-07	2.65e-07	8.68e-07	7.58e-08	3.12e-09	3.36e-07	NaN	1.27967	0.788665	2.58083	0.225286	0.00926679	0.70459	3.66289	0.0982326	2.29339	1.01537	1.2603	1.02179	0.771846	0.432925	0.021405
BRO	1	3	23	23	2	132BRO	011FP2	1.88374	1.88426	1.87076	1.72274	1.86785	5.14e-07	3.7e-07	1.5e-06	5.48e-08	3.9e-09	4.3e-07	NaN	1.19579	0.859551	3.49029	0.127363	0.00907563	0.937812	3.72173	0.148047	0.860288	1.08108	1.10611	0.96236	0.89317	0.411209	0.0220706
BRO	1	3	23	23	1	132BRO131	011FP2	1.88374	1.88426	1.87076	1.72274	1.86785	7.82e-07	4.44e-07	1.44e-06	1.41e-07	8.75e-09	5.86e-07	NaN	1.33587	0.758108	2.45822	0.241371	0.0149325	0.937812	2.62123	0.148047	1.63037	1.08108	1.23568	0.96236	0.787759	0.411209	0.0363136
BRO	2	3	23	23	2	232BRO	012FP1	1.88099	1.89659	1.87632	1.72076	1.85176	1.04e-06	6.73e-07	2.61e-06	1.55e-07	8.46e-09	8.35e-07	NaN	1.24915	0.80552	3.13154	0.185384	0.01013	0.784247	3.99305	0.146598	1.26458	1.05045	1.18916	0.966884	0.83311	0.531422	0.0190621
BRO	8	8C 13WT10	90	100	1	13WT1081BRO	010FP3	1.88543	1.88372	1.85925	1.72716	1.86435	4.26e-07	2.38e-07	1.89e-08	2.42e-09	6.55e-07	3.17e-07	NaN	1.34383	0.750231	0.0595824	0.00764545	2.07003	1.19145	0.0500084	0.168392	0.0454027	0.997579	1.34709	1.08388	0.692172	0.54746	3.78116
BRO	8	8C 13WT10	90	100	2	13WT1082BRO	011FP3	1.88881	1.88016	1.85109	1.72167	1.88629	1.21e-06	1.87e-06	1.46e-07	4.03e-09	1.34e-06	1.45e-06	NaN	0.835427	1.29482	0.100936	0.00278522	0.925825	1.26525	0.0797752	0.146125	0.0190605	1.02585	0.814373	1.00505	1.28831	0.359094	2.57823
BRO	8	8C 13WT10	90	100	3	13WT1083BRO	012FP3	1.8895	1.90192	1.85731	1.72452	1.89094	6.47e-07	4.43e-07	4.64e-08	4.16e-09	2.29e-07	5.28e-07	NaN	1.2257	0.839389	0.0878936	0.00787541	0.434645	1.17866	0.0745707	0.176063	0.0447307	1.0656	1.15024	0.963561	0.871132	0.358734	1.21161
BRO	8	8C 8WT10	55	65	1	E11	003 007 FP3	1.5135	1.2735	1.3425	1.452	1.524	NaN	8.7e-07	3.29e-07	1.72e-08	6.99e-07	NaN	NaN	NaN	NaN	NaN	NaN	NaN	1.12769	NaN	0.261795	NaN	1.31456	NaN	0.76071	NaN	0.481903	NaN
BRO	8	8C 8WT10	55	65	2	G7	007 008 FP4	1.766	2.023	2.023	1.205	2.5	2.53e-06	1.94e-06	9.16e-07	5.65e-08	1.57e-06	2.22e-06	NaN	1.14279	0.875048	0.413176	0.0254941	0.706487	0.915093	0.451513	0.0815395	0.31266	0.901006	1.26835	1.10987	0.788423	0.46306	1.52569
BRO	8	8C 8WT10	55	65	3	8WT1083BRO	009FP3	1.87988	1.88296	1.87016	1.71813	1.87523	2.03e-07	2.31e-07	1.34e-07	1.51e-08	2.86e-07	2.15e-07	NaN	0.945227	1.07353	0.621906	0.070351	1.33148	0.972884	0.63924	0.13649	0.515429	0.935877	1.00999	1.08637	0.98818	0.321839	4.1371
COL	1	1	9	9	1	111COL	006FP2	NaN	1.89284	1.87491	1.75695	1.87568	NaN	1.55e-08	5.31e-14	6.33e-09	1.48e-10	1.55e-08	Bad UBC, order of magnitude (UNF)	NaN	1.00312	3.42e-06	0.408164	0.00954075	NaN	NaN	NaN	NaN	NaN	NaN	NaN	NaN	NaN	NaN
COL	1	1	9	9	2	112COL	009FP1	1.868	1.8849	1.87638	1.74067	1.84771	9.25e-08	1.47e-07	3.68e-08	8.09e-09	1.85e-09	1.17e-07	NaN	0.793141	1.2632	0.315417	0.0693468	0.015877	0.841732	0.374724	0.0920425	0.753421	1.08201	0.733022	0.963693	1.31079	0.507846	0.0312635
COL	2	1	9	9	2	212COL	010FP1	1.8647	1.8809	1.87955	1.72822	1.85484	3.72e-08	2.15e-08	6.04e-09	3.11e-09	3.41e-10	2.82e-08	Bad UBC	1.31939	0.761566	0.214281	0.110485	0.0120939	0.714524	0.299893	0.110966	0.995661	1.045	1.26257	1.0011	0.760727	0.484065	0.0249841
COL	3	1	9	9	2	312COL	011FP1	1.875	1.88906	1.8814	1.72278	1.84935	8.38e-08	8.81e-08	1.59e-08	5.43e-09	4.13e-10	8.37e-08	NaN	1.00142	1.05282	0.189521	0.0648825	0.00493234	0.780389	0.242855	0.143972	0.450659	1.28092	0.781798	0.830475	1.26774	0.596948	0.0082626
COL	1	2	16	16	1	121COL	001FP1	1.86774	1.90213	1.87451	1.71119	1.84445	2.83e-07	1.81e-07	1.73e-07	2.78e-08	1.97e-09	2.26e-07	NaN	1.25294	0.802145	0.764853	0.123369	0.00874923	0.880708	0.868453	0.192921	0.639481	1.13909	1.09995	0.889496	0.901796	0.67031	0.0130525
COL	2	2	16	16	1	221COL	001FP1	1.86774	1.90213	1.87451	1.71119	1.84445	8.94e-07	7.19e-07	1.94e-07	2.3e-08	4.24e-09	7.96e-07	NaN	1.12334	0.902809	0.244213	0.0289435	0.00531953	0.880708	0.277291	0.192921	0.150028	1.13909	0.98618	0.889496	1.01497	0.67031	0.00793593
COL	3	2	16	16	1	321COL	001FP2	1.86641	1.8869	1.86963	1.74128	1.85735	4.18e-07	3.71e-07	7.16e-08	5.1e-09	2.07e-09	3.92e-07	NaN	1.06541	0.946649	0.18263	0.0130056	0.00528422	0.82159	0.222289	0.0913827	0.14232	1.17879	0.903818	0.907243	1.04343	0.492102	0.010738
COL	2	2	16	16	2	222COL	009FP2	1.86867	1.88053	1.87899	1.73996	1.85198	9.09e-07	2.86e-07	6.07e-08	1.33e-08	2.3e-09	5.07e-07	NaN	1.79172	0.563002	0.119687	0.0261648	0.00452941	0.70459	0.169867	0.0982326	0.266356	1.01537	1.76459	1.02179	0.550996	0.432925	0.0104623
COL	3	2	16	16	2	322COL	010FP2	1.87255	1.89381	1.86992	1.73219	1.84777	4.41e-07	1.6e-07	4.21e-08	1.13e-08	1.07e-09	2.64e-07	NaN	1.66645	0.605601	0.159355	0.0425614	0.00402905	1.44712	0.110119	0.202229	0.210462	1.71879	0.969548	0.645878	0.937639	0.919584	0.00438138
COL	1	2	16	16	2	122COL	012FP1	1.88099	1.89659	1.87632	1.72076	1.85176	1.77e-07	7.08e-08	2.87e-08	3.89e-09	6.95e-10	1.1e-07	NaN	1.60714	0.641856	0.260001	0.0352794	0.00629329	0.784247	0.331529	0.146598	0.240654	1.05045	1.52995	0.966884	0.66384	0.531422	0.0118424
COL	1	5	37	37	1	151COL	002FP2	1.87118	1.89254	1.89011	1.72422	1.87263	4.42e-07	3.45e-07	5.1e-08	4.1e-09	4.84e-08	3.79e-07	NaN	1.1667	0.910203	0.134648	0.0108398	0.127933	0.715707	0.188133	0.162288	0.0667931	1.26694	0.920879	0.833998	1.09137	0.456103	0.280492
COL	3	5	37	37	1	251COL	002FP3	1.88057	1.90335	1.89829	1.7732	1.88871	4.65e-07	4.49e-07	1.51e-08	8.87e-10	2.37e-08	4.54e-07	NaN	1.02475	0.989153	0.0333473	0.00195273	0.0522139	0.69207	0.0481849	0.0619552	0.0315185	1.04029	0.985064	0.981386	1.00791	0.33273	0.156926
COL	1	5	37	37	2	152COL	010FP3	1.88543	1.88372	1.85925	1.72716	1.86435	5.9e-07	3.5e-07	9.47e-09	2.2e-09	2.31e-08	4.48e-07	NaN	1.31923	0.782753	0.0211519	0.00491519	0.0516632	1.19145	0.0177531	0.168392	0.029189	0.997579	1.32243	1.08388	0.722178	0.54746	0.094369
COL	3	5	37	37	2	252COL	011FP3	1.88881	1.88016	1.85109	NaN	1.88629	1.37e-07	2.43e-07	4.69e-09	NaN	6.7e-09	1.79e-07	Missing values	0.762306	1.35196	0.0261679	NaN	0.0373681	1.26525	0.0206819	0.146125	NaN	1.02585	0.743095	1.00505	1.34516	0.359094	0.104062
COL	2	5	37	37	2	352COL	012FP2	1.88245	1.87766	1.86989	1.71715	1.85858	1.54e-06	1.02e-06	2.91e-08	4.07e-08	1.82e-08	1.23e-06	NaN	1.25085	0.830124	0.0236002	0.0330677	0.0147957	0.81933	0.0288043	0.130602	0.253194	0.892982	1.40076	1.13319	0.732553	0.43295	0.0341742
COL	1	7	51	51	1	C2	003 007 FP1	1.87329	1.89506	1.87916	1.73378	1.87786	4.06e-08	4.06e-08	1.9e-09	NaN	1.13e-08	4.06e-08	NaN	1.0009	0.999099	0.0468707	NaN	0.277809	0.982724	0.0476947	0.181607	NaN	1.17757	0.849973	0.849207	1.17651	0.514649	0.539803
COL	3	7	51	51	2	372COL	016FP7	1.89644	1.88728	1.89109	1.70604	1.89299	4.85e-07	6.47e-07	6.1e-09	8.56e-10	7.68e-08	5.58e-07	NaN	0.869369	1.15936	0.010943	0.00153425	0.1376	0.661754	0.0165363	0.145177	0.0105681	0.87103	0.998093	1.21042	0.957811	0.287181	0.479141
COL	1	7	51	51	2	172COL	019FP7	1.88187	1.90044	1.90038	1.72628	1.91807	1.32e-06	7.98e-07	1.81e-08	6.68e-09	6.76e-08	1.03e-06	NaN	1.28855	0.7782	0.0175975	0.00650883	0.0658833	0.825716	0.0213118	0.149663	0.04349	1.12108	1.14938	0.894724	0.869766	0.286746	0.229762
COL	2	7	51	51	2	272COL	020FP7	1.88258	1.90751	1.90077	1.72032	1.92048	7.18e-08	8.24e-08	4.59e-10	2.01e-09	1.52e-08	7.47e-08	NaN	0.961161	1.10274	0.00614309	0.0268273	0.203394	0.865621	0.00709674	0.176728	0.1518	1.16944	0.8219	0.858029	1.2852	0.291904	0.696786
COL	2	9	65	65	1	291COL	004FP2	1.87305	1.89591	1.87559	1.74662	1.87864	3.94e-07	4.34e-07	1.52e-09	5.33e-10	2.42e-07	4.08e-07	NaN	0.966186	1.06197	0.00372502	0.00130541	0.593171	1.28987	0.00288789	0.0723901	0.0180329	1.02024	0.947015	0.833748	1.27373	0.240781	2.46353
COL	3	9	65	65	1	391COL	004FP2	1.87305	1.89591	1.87559	1.74662	1.87864	1.55e-08	1.69e-08	4.61e-10	9.36e-10	1.16e-08	1.61e-08	Bad UBC, order of magnitude (FLC)	0.967104	1.0496	0.0286724	0.0582654	0.719103	NaN	NaN	NaN	NaN	NaN	NaN	NaN	NaN	NaN	NaN
COL	1	9	65	65	2	192COL	013FP2	1.89904	1.90271	1.9034	1.70761	1.889	4.15e-07	1.15e-06	5e-09	3.77e-09	4.39e-07	6.82e-07	NaN	0.608306	1.68948	0.00733441	0.00552791	0.643791	0.764524	0.00959343	0.233327	0.0236917	0.946251	0.642859	1.13119	1.49354	0.356246	1.80715
COL	3	9	65	65	2	392COL	014FP6	1.90482	1.89972	1.87325	NaN	1.87892	1.06e-06	6.56e-07	3.09e-09	NaN	5.79e-07	8.16e-07	Missing values	1.29631	0.804839	0.00378714	NaN	0.71035	1.34073	0.00282468	0.204391	NaN	1.03993	1.24653	1.03698	0.776141	0.581865	1.22082
COL	2	9	65	65	2	292COL	015FP2	1.90353	1.89417	1.87892	1.71913	1.89298	3.19e-07	3.66e-07	6.36e-10	5.45e-11	2.02e-07	3.4e-07	NaN	0.938087	1.07715	0.00187292	0.000160575	0.594908	1.04908	0.0017853	0.205684	0.000780688	1.0516	0.892059	0.968382	1.11232	0.366226	1.62443
COL	2	11	79	79	1	F12	003 007 FP3	1.5135	1.2735	1.3425	1.452	1.524	3.88e-07	3.3e-07	2.51e-09	5.71e-10	1.59e-07	3.58e-07	NaN	1.08384	0.922649	0.00701853	0.00159657	0.444415	1.12769	0.00622383	0.261795	0.00609855	1.31456	0.824484	0.76071	1.21288	0.481903	0.922209
COL	1	11	79	79	1	1111COL	006FP3	1.87135	1.88785	1.86674	1.72318	1.88094	4.96e-07	4.11e-07	1.58e-09	6.25e-10	1.79e-07	4.36e-07	NaN	1.13908	0.943864	0.00361813	0.00143432	0.412047	2.43184	0.00148782	0.367617	0.00390167	3.40765	0.334272	1.5644	0.60334	1.03782	0.397029
COL	3	11	79	79	1	D3	007 008 FP4	1.766	2.023	2.023	1.205	2.5	6.8e-07	7.38e-07	9.76e-10	4.58e-10	4.48e-07	7.08e-07	NaN	0.959558	1.04215	0.00137758	0.000645961	0.632459	0.915093	0.00150541	0.0815395	0.00792206	0.901006	1.06499	1.10987	0.93898	0.46306	1.36583
COL	1	11	79	79	2	1112COL	013FP3	1.88302	1.89314	1.87306	1.73979	1.88581	1.57e-06	2.1e-06	5.86e-09	1.41e-08	1.02e-06	1.81e-06	NaN	0.868988	1.16236	0.0032415	0.0077883	0.565456	0.866381	0.00374143	0.096316	0.080862	0.939115	0.925327	1.16709	0.99595	0.242664	2.3302
COL	3	11	79	79	2	3112COL	014FP4	1.87992	1.91971	1.87856	1.70837	1.88699	1.51e-06	6.38e-07	4.75e-10	4.3e-09	4.25e-07	9.68e-07	NaN	1.559	0.659057	0.000490627	0.0044377	0.438566	1.09719	0.000447167	0.241073	0.0184081	1.21167	1.28666	0.869193	0.75824	0.360863	1.21533
COL	2	11	79	79	2	2112COL	015FP3	1.89281	1.89762	1.89592	NaN	1.92113	9.76e-07	6.46e-07	1.86e-09	NaN	2e-07	7.61e-07	Missing values	1.28183	0.849102	0.00243838	NaN	0.263327	0.898213	0.0027147	0.195903	NaN	1.17831	1.08785	0.874314	0.971164	0.28899	0.911196
COL	3	14	114	114	2	3142COL	015FP2	1.90353	1.89417	1.87892	NaN	1.89298	3.52e-07	6.49e-07	1.52e-10	NaN	4.85e-07	4.72e-07	Missing values	0.746588	1.37645	0.000322002	NaN	1.02907	1.04908	0.000306938	0.205684	NaN	1.0516	0.709956	0.968382	1.4214	0.366226	2.80994
COL	1	14	114	114	1	1141COL	016FP6	1.8662	1.90549	1.89735	1.72908	1.88794	1.32e-06	1.36e-06	2.84e-09	8.04e-10	1.03e-06	1.32e-06	NaN	1.00081	1.0288	0.00215935	0.000610172	0.784604	0.773496	0.00279168	0.122447	0.00498314	1.33059	0.752159	0.748278	1.37489	0.401535	1.95401
COL	2	14	114	114	1	2141COL	017FP2	1.88289	1.8966	1.87626	1.68928	1.90023	2.43e-07	4.18e-07	1.53e-10	1.83e-09	4.06e-07	3.14e-07	NaN	0.774023	1.32982	0.00048686	0.00581576	1.29321	1.07709	0.000452016	0.291836	0.0199282	1.1308	0.684491	0.896035	1.48412	0.346238	3.73504
COL	3	14	114	114	1	3141COL	018FP1	1.87818	1.88808	1.8758	NaN	1.88665	1.26e-06	1.17e-06	3.25e-10	NaN	2e-06	1.21e-06	Missing values	1.03792	0.963627	0.000267557	NaN	1.64683	0.884537	0.000302483	0.115537	NaN	1.0584	0.980642	0.897426	1.07377	0.344665	4.77807
COL	1	14	114	114	2	1142COL	019FP2	1.90057	1.87824	1.87982	1.7141	1.89634	1.15e-06	1.25e-06	5.67e-10	8.29e-10	1.92e-06	1.19e-06	NaN	0.967288	1.04723	0.00047686	0.000696464	1.6092	1.10612	0.000431109	0.188318	0.00369834	0.95616	1.01164	1.05573	0.991956	0.363931	4.42172
COL	2	14	114	114	2	2142COL	020FP2	1.90785	1.89962	1.88201	1.68971	1.90013	1.11e-06	1.25e-06	8.09e-10	2.15e-09	7.41e-07	1.17e-06	NaN	0.948829	1.07106	0.000692645	0.00184087	0.634705	1.25034	0.000553967	0.3489	0.0052762	0.987811	0.960537	1.02211	1.04789	0.418299	1.51735
COL	1	15	128	128	1	1151COL	013FP1	1.89261	1.89846	1.88809	1.69849	1.89229	7.31e-07	9.66e-07	6.27e-07	5.59e-08	5.94e-07	8.11e-07	Contamination? V high FLC	0.90085	1.19135	0.773072	0.068882	0.731856	1.31204	NaN	NaN	NaN	NaN	NaN	NaN	NaN	NaN	NaN
COL	2	15	128	128	1	2151COL	014FP1	1.89092	1.8987	1.87583	1.68581	1.89428	6.98e-07	8.08e-07	7.94e-10	1.17e-09	5e-07	7.41e-07	NaN	0.942759	1.09062	0.00107169	0.00158165	0.675169	1.19098	0.000899838	0.405493	0.00390055	1.29674	0.72702	0.844208	1.29189	0.417674	1.6165
COL	3	15	128	128	1	3151COL	015FP1	1.88579	1.88749	1.87612	NaN	1.88913	1.92e-06	2.12e-06	5.68e-10	NaN	1.62e-06	2e-06	Missing values	0.959583	1.05792	0.000283657	NaN	0.80706	1.15935	0.000244668	0.301099	NaN	1.24228	0.772439	0.860931	1.22882	0.463419	1.74154
COL	2	15	128	128	2	2152COL	017FP3	1.87941	1.89809	1.85559	NaN	1.89286	2.1e-07	3.25e-07	2.57e-10	NaN	1.98e-07	2.6e-07	Missing values	0.807106	1.25077	0.000988572	NaN	0.761926	1.42603	0.000693236	0.239244	NaN	1.16481	0.692909	0.874626	1.43007	0.398456	1.9122
COL	3	15	128	128	2	3152COL	018FP7	1.8863	1.89323	1.88903	1.71439	1.89462	2.4e-07	3.34e-07	2.59e-10	2.16e-08	3.76e-07	2.77e-07	NaN	0.867341	1.20644	0.000933132	0.077828	1.35689	0.943137	0.000989392	0.184797	0.421153	1.03835	0.83531	0.965986	1.24892	0.390366	3.47594
COL	1	15	128	128	2	1152COL	020FP3	1.8778	1.90697	1.86206	1.71413	1.91182	1.15e-06	6.88e-07	4.09e-10	1.92e-08	5.6e-07	8.64e-07	NaN	1.33127	0.796433	0.000473012	0.0221896	0.648261	1.48009	0.000319584	0.190239	0.116641	1.2726	1.0461	0.79661	0.999777	0.297273	2.1807
COL	1	13	100	100	1	1131COL	004FP3	1.87999	1.89718	NaN	NaN	1.88538	7.92e-11	9.66e-11	NaN	NaN	8.31e-11	9.03e-11	Bad UBC	0.877024	1.06899	NaN	NaN	0.919553	1.28987	NaN	0.179254	NaN	1.25463	0.699032	0.833748	NaN	NaN	NaN
COL	2	13	100	100	1	2131COL	005FP1	1.87074	1.88866	1.86393	1.73025	1.87136	3.43e-06	2.35e-06	2.93e-09	5.43e-10	2.9e-06	2.79e-06	NaN	1.22701	0.840986	0.00104811	0.000194454	1.03703	0.87872	0.00119277	0.123899	0.00156946	0.989991	1.23941	1.01214	0.830896	0.335857	3.08772
COL	3	13	100	100	1	3131COL	005FP2	1.87738	1.895	1.87672	1.73259	1.86768	1.03e-06	1.4e-06	8.96e-10	1.73e-09	1.68e-06	1.2e-06	NaN	0.857558	1.17174	0.000749059	0.00144875	1.40099	0.850419	0.000880811	0.142996	0.0101314	1.08724	0.788748	0.937791	1.24947	0.424808	3.29793
COL	2	13	100	100	2	2132COL	017FP2	1.88289	1.8966	1.87626	NaN	1.90023	3.09e-07	4.4e-07	2.57e-10	NaN	2.44e-07	3.62e-07	Missing values	0.853451	1.21534	0.000709857	NaN	0.675466	1.07709	0.000659053	0.291836	NaN	1.1308	0.754732	0.896035	1.35636	0.346238	1.95087
COL	3	13	100	100	2	3132COL	018FP1	1.87818	1.88808	1.8758	NaN	1.88665	6.61e-07	5.73e-07	5.21e-10	NaN	4.19e-07	6.04e-07	Missing values	1.0938	0.948759	0.000862345	NaN	0.69355	0.884537	0.000974912	0.115537	NaN	1.0584	1.03344	0.897426	1.0572	0.344665	2.01225
COL	1	13	100	100	2	1132COL	019FP3	1.89621	1.89562	1.88374	1.70489	1.9038	1.93e-07	2.16e-07	1.25e-10	1.2e-09	1.39e-07	2.02e-07	NaN	0.954644	1.06826	0.000621826	0.00592807	0.686995	1.05274	0.000590675	0.249768	0.0237343	1.07757	0.885921	0.937987	1.13888	0.358514	1.91623
COL	2	17	156	156	1	2171 COL	T17 FP1	1.87875	1.87217	1.86863	1.69041	1.87207	1.9e-06	1.19e-06	1.14e-09	1.06e-09	6.24e-07	1.5e-06	NaN	1.26377	0.791281	0.000755744	0.000705096	0.415549	1.15354	0.000655154	0.232756	0.00302934	1.0991	1.14983	0.909836	0.869696	0.455106	0.913083
COL	3	17	156	156	1	3171 COL	T17 FP2	1.86756	1.86273	1.86623	1.68869	1.87493	1.72e-06	1.06e-06	9.63e-10	7.53e-10	3.68e-07	1.35e-06	NaN	1.27722	0.78295	0.00071406	0.000558245	0.273064	1.06957	0.000667614	0.222511	0.00250885	1.08395	1.1783	0.922548	0.848682	0.377291	0.723748
COL	1	17	156	156	2	1172 COL	T17 FP3	1.87141	1.85894	1.87842	1.70743	1.8995	2.33e-06	2.23e-06	2.76e-10	5.76e-09	7.18e-07	2.28e-06	NaN	1.02243	0.978058	0.000120919	0.00252397	0.314492	0.995003	0.000121526	0.154747	0.0163103	1.11643	0.915807	0.895712	1.09193	0.26627	1.1811
COL	2	17	156	156	2	2172 COL	T17 FP4	1.88299	1.87427	1.85002	1.70246	1.88145	1.32e-06	2e-07	5.08e-11	1.41e-09	4.42e-07	5.14e-07	NaN	2.56958	0.389169	9.89e-05	0.00274661	0.859988	1.50587	6.57e-05	0.211762	0.0129703	1.01314	2.53626	0.987035	0.394281	0.357668	2.40443
COL	3	17	156	156	2	3172 COL	T17 FP5	1.8793	1.89836	1.8706	1.69511	1.88532	1.25e-06	4.99e-07	1.71e-10	NaN	2.18e-07	7.91e-07	NaN	1.58401	0.63131	0.000216708	NaN	0.274958	0.856659	0.000252969	0.208815	NaN	1.02319	1.54811	0.977339	0.645947	0.261137	1.05293
COL	22	22C 13WT10	110	100	1	13WT10221COL	006FP1	1.87535	1.8943	1.86145	NaN	NaN	3.51e-08	7.31e-08	1.2e-10	NaN	NaN	5.03e-08	Missing values	0.699231	1.45414	0.00238173	NaN	NaN	1.07759	0.00221024	0.164461	NaN	1.2976	0.538866	0.810554	1.794	0.573216	NaN
COL	22	22C 8WT10	75	65	2	8WT10222COL	005FP2	1.87738	1.895	1.87672	1.73259	1.86768	2.36e-07	1.97e-07	1.89e-07	1.2e-08	5.23e-09	2.12e-07	NaN	1.11438	0.932263	0.894217	0.0565855	0.0246954	0.850419	1.0515	0.142996	0.395713	1.08724	1.02496	0.937791	0.994105	0.424808	0.058133
COL	22	22C 8WT10	75	65	1	8WT10221COL	005FP3	1.86287	1.89244	1.86343	NaN	1.84872	1.26e-07	9.76e-08	5.25e-11	NaN	4.74e-10	1.09e-07	Missing values	1.1548	0.894958	0.000481768	NaN	0.00434363	0.90024	0.000535155	0.110318	NaN	1.19392	0.967239	0.864443	1.0353	0.476702	0.00911183
COL	22	22C 8WT10	75	65	3	8WT10223COL	006FP1	1.87535	1.8943	1.86145	NaN	1.85957	4.98e-07	2.89e-07	7e-10	NaN	4.22e-09	3.77e-07	Missing values	1.32339	0.767762	0.00185984	NaN	0.0112123	1.07759	0.00172593	0.164461	NaN	1.2976	1.01987	0.810554	0.947208	0.573216	0.0195604
COL	1	3	23	23	1	131COL	001FP3	1.88776	1.90249	1.88946	1.76783	1.87991	5.94e-07	3.35e-07	3.72e-08	3.67e-09	5.29e-09	4.41e-07	NaN	1.34665	0.759277	0.084269	0.00832515	0.0119907	0.906749	0.0929353	0.0776456	0.10722	1.09732	1.22722	0.95644	0.793857	0.455825	0.0263054
COL	2	3	23	23	1	231COL	002FP1	1.87608	1.89537	1.88205	1.72199	1.8543	1.73e-07	1.65e-07	1.52e-08	3.36e-09	1.32e-09	1.67e-07	NaN	1.0379	0.989376	0.0907146	0.0201061	0.0078919	0.75207	0.12062	0.1661	0.121048	1.07309	0.967206	0.946048	1.0458	0.564559	0.0139789
COL	3	3	23	23	2	332COL	009FP2	1.86867	1.88053	1.87899	1.73996	1.85198	4.84e-07	3.32e-07	3.34e-08	3.86e-09	2.87e-09	3.97e-07	NaN	1.21766	0.834488	0.083991	0.00970594	0.00722829	0.70459	0.119206	0.0982326	0.0988057	1.01537	1.19922	1.02179	0.816692	0.432925	0.0166964
COL	1	3	23	23	2	132COL	011FP1	1.875	1.88906	1.8814	1.72278	1.84935	9.16e-07	9.74e-07	5.04e-08	2.69e-09	7.21e-09	8.94e-07	NaN	1.02461	1.08894	0.0564226	0.00301123	0.00805947	0.780389	0.0723006	0.143972	0.0209153	1.28092	0.799903	0.830475	1.31122	0.596948	0.0135011
COL	2	3	23	23	2	232COL	012FP2	1.88245	1.87766	1.86989	1.71715	1.85858	1.52e-06	5.7e-07	9.7e-08	1.37e-08	7.29e-09	9.16e-07	NaN	1.661	0.621555	0.105872	0.014978	0.00796073	0.81933	0.129217	0.130602	0.114684	0.892982	1.86006	1.13319	0.548499	0.43295	0.0183872
COL	3	3	23	23	1	331EDIN	002FP2	1.87118	1.89254	1.89011	1.72422	1.87263	1.98e-07	2.55e-07	2.66e-08	3.42e-09	2.26e-09	2.24e-07	NaN	0.887021	1.1385	0.118801	0.0152656	0.0101122	0.715707	0.165992	0.162288	0.0940644	1.26694	0.700131	0.833998	1.36511	0.456103	0.0221709
COL	8	8C 13WT10	90	100	1	13WT1081COL	010FP3	1.88543	1.88372	1.85925	1.72716	1.86435	9e-07	6.12e-07	1.22e-09	7.52e-09	3.3e-07	7.33e-07	NaN	1.22744	0.834367	0.00166524	0.0102493	0.449875	1.19145	0.00139766	0.168392	0.060866	0.997579	1.23042	1.08388	0.769798	0.54746	0.821749
COL	8	8C 13WT10	90	100	2	13WT1082COL	011FP3	1.88881	1.88016	1.85109	1.72167	1.88629	2.1e-06	2.92e-06	9.98e-09	2.76e-09	5.17e-07	2.44e-06	NaN	0.857547	1.19309	0.00408252	0.00112921	0.211295	1.26525	0.00322663	0.146125	0.00772769	1.02585	0.835936	1.00505	1.1871	0.359094	0.588411
COL	8	8C 13WT10	90	100	3	13WT1083COL	012FP3	1.8895	1.90192	1.85731	1.72452	1.89094	5.42e-06	3.97e-06	1.88e-08	3.09e-09	1.86e-06	4.54e-06	NaN	1.19302	0.875013	0.00414232	0.000681247	0.409657	1.17866	0.00351443	0.176063	0.00386935	1.0656	1.11958	0.963561	0.908103	0.358734	1.14195
COL	8	8C 8WT10	55	65	3	8WT1083COL	009FP3	1.87988	1.88296	1.87016	1.71813	1.87523	4.2e-07	3.32e-07	1.7e-09	4.8e-10	2.44e-07	3.67e-07	NaN	1.14264	0.905108	0.00461941	0.00130733	0.664215	0.972884	0.00474816	0.13649	0.00957821	0.935877	1.22093	1.08637	0.833149	0.321839	2.06381
EDI	1	1	9	9	1	111EDI	006FP2	NaN	1.89284	1.87491	1.75695	1.87568	NaN	1.66e-08	4.73e-09	3.53e-09	6.88e-10	1.66e-08	Bad UBC	NaN	1.00017	0.284857	0.212481	0.0414109	0.865121	0.329269	0.0688171	3.08762	1.00911	NaN	0.999189	1.00098	0.389581	0.106296
EDI	3	1	9	9	1	H6	007 008 FP3	1.5135	1.2735	1.3425	1.452	1.524	6.49e-09	1.45e-08	1.1e-08	3.92e-09	9.96e-10	9.7e-09	Bad UBC	0.669673	1.49327	1.13668	0.403896	0.102666	1.12769	1.00798	0.261795	1.54279	1.31456	0.509427	0.76071	1.96299	0.481903	0.213043
EDI	1	1	9	9	2	112EDI	009FP1	1.868	1.8849	1.87638	1.74067	1.84771	7.85e-09	1.42e-08	4.64e-08	2.4e-08	8.25e-10	1.05e-08	Bad UBC, order of magnitude (UNF)	0.746931	1.353	4.41977	2.28071	0.078584	NaN	NaN	NaN	NaN	NaN	NaN	NaN	NaN	NaN	NaN
EDI	2	1	9	9	2	212EDI	010FP1	1.8647	1.8809	1.87955	1.72822	1.85484	1.1e-07	5.95e-08	1.7e-07	4.11e-08	2.72e-09	8.04e-08	NaN	1.36812	0.740871	2.10965	0.511805	0.0338778	0.714524	2.95252	0.110966	4.61227	1.045	1.3092	1.0011	0.740054	0.484065	0.069986
EDI	3	1	9	9	2	312EDI	011FP1	1.875	1.88906	1.8814	1.72278	1.84935	4.18e-08	4.84e-08	1.07e-07	3.53e-08	2.08e-09	4.46e-08	NaN	0.935417	1.08363	2.40247	0.791102	0.0466092	0.780389	3.07856	0.143972	5.49482	1.28092	0.730271	0.830475	1.30483	0.596948	0.0780791
EDI	1	2	16	16	1	121EDI	001FP1	1.86774	1.90213	1.87451	1.71119	1.84445	8.11e-08	2.83e-08	8.06e-08	1.26e-08	1.51e-09	4.73e-08	NaN	1.71364	0.598052	1.70457	0.266679	0.0319657	0.880708	1.93545	0.192921	1.38232	1.13909	1.5044	0.889496	0.672349	0.67031	0.0476879
EDI	2	2	16	16	1	221EDI	001FP1	1.86774	1.90213	1.87451	1.71119	1.84445	1.24e-07	1.49e-07	5.45e-07	7.87e-08	6.28e-09	1.23e-07	NaN	1.00743	1.2074	4.41223	0.637648	0.0508325	0.880708	5.00987	0.192921	3.30523	1.13909	0.884422	0.889496	1.35739	0.67031	0.0758343
EDI	3	2	16	16	1	321EDI	001FP2	1.86641	1.8869	1.86963	1.74128	1.85735	1.16e-07	2.64e-07	2.55e-07	5.17e-08	5.45e-09	1.73e-07	NaN	0.669392	1.52584	1.47477	0.298706	0.0314541	0.82159	1.79502	0.0913827	3.26874	1.17879	0.567865	0.907243	1.68184	0.492102	0.0639177
EDI	2	2	16	16	2	222EDI	009FP2	1.86867	1.88053	1.87899	1.73996	1.85198	3.29e-07	3.18e-07	3.97e-07	1.21e-07	4.94e-09	3.12e-07	NaN	1.0565	1.02054	1.27459	0.387558	0.0158395	0.70459	1.80898	0.0982326	3.94531	1.01537	1.0405	1.02179	0.99878	0.432925	0.0365871
EDI	3	2	16	16	2	322EDI	010FP2	1.87255	1.89381	1.86992	1.73219	1.84777	3.13e-08	1.34e-08	4.88e-08	1.24e-08	2.19e-09	2.03e-08	Bad UBC	1.53998	0.662455	2.40229	0.610274	0.107898	1.44712	1.66005	0.202229	3.01774	1.71879	0.89597	0.645878	1.02567	0.919584	0.117333
EDI	1	2	16	16	2	122EDI	012FP1	1.88099	1.89659	1.87632	1.72076	1.85176	6.13e-08	1.96e-08	8.1e-08	2.49e-08	1.2e-09	3.39e-08	Bad UBC	1.80727	0.577453	2.38809	0.732634	0.0352852	0.784247	3.04507	0.146598	4.99757	1.05045	1.72047	0.966884	0.597231	0.531422	0.0663978
EDI	1	5	37	37	1	151EDI	002FP2	1.87118	1.89254	1.89011	1.72422	1.87263	2.44e-07	1.49e-07	2.22e-07	4.65e-08	5.09e-10	1.89e-07	NaN	1.29352	0.790892	1.17649	0.246492	0.00270078	0.715707	1.64382	0.162288	1.51885	1.26694	1.02098	0.833998	0.948315	0.456103	0.00592143
EDI	3	5	37	37	1	251EDI	002FP3	1.88057	1.90335	1.89829	1.7732	1.88871	3.87e-07	1.34e-07	2.47e-07	2.83e-08	3.43e-08	2.26e-07	NaN	1.71624	0.595191	1.09466	0.125373	0.152325	0.69207	1.58172	0.0619552	2.02361	1.04029	1.64977	0.981386	0.606481	0.33273	0.457806
EDI	2	5	37	37	1	G1	003 007 FP1	1.87329	1.89506	1.87916	1.73378	1.87786	3.16e-07	1.77e-07	2.72e-07	8.61e-08	3.91e-08	2.37e-07	NaN	1.33454	0.749319	1.14725	0.363474	0.165011	0.982724	1.16742	0.181607	2.00143	1.17757	1.13331	0.849207	0.882375	0.514649	0.320628
EDI	1	5	37	37	2	152EDI	010FP2	1.87255	1.89381	1.86992	1.73219	1.84777	5.22e-07	2.31e-07	5.58e-07	9.21e-08	4.61e-08	3.44e-07	NaN	1.51495	0.671023	1.61965	0.267405	0.133891	1.44712	1.11922	0.202229	1.32229	1.71879	0.881403	0.645878	1.03893	0.919584	0.145599
EDI	3	5	37	37	2	252EDI	011FP2	1.88374	1.88426	1.87076	1.72274	1.86785	1.38e-07	1.32e-07	3.31e-07	1.91e-08	1.07e-08	1.32e-07	NaN	1.03952	0.994574	2.49994	0.144475	0.0807514	0.937812	2.66572	0.148047	0.975869	1.08108	0.961559	0.96236	1.03347	0.411209	0.196376
EDI	2	5	37	37	2	352EDI	012FP2	1.88245	1.87766	1.86989	1.71715	1.85858	4.49e-07	2.29e-07	6.07e-07	7.18e-08	3.69e-08	3.2e-07	NaN	1.40263	0.714796	1.89621	0.224452	0.115379	0.81933	2.31435	0.130602	1.71859	0.892982	1.57072	1.13319	0.63078	0.43295	0.266495
EDI	3	7	51	51	2	372EDI	016FP7	1.89644	1.88728	1.89109	1.70604	1.89299	7.36e-07	7.46e-07	4.64e-07	1.19e-07	1.24e-07	7.3e-07	NaN	1.00769	1.02094	0.635459	0.163179	0.170303	0.661754	0.960265	0.145177	1.124	0.87103	1.1569	1.21042	0.843455	0.287181	0.593016
EDI	1	7	51	51	2	172EDI	019FP2	1.90057	1.87824	1.87982	1.7141	1.89634	1.36e-06	7.57e-07	8.03e-07	1.61e-07	2.69e-07	1e-06	NaN	1.36019	0.754799	0.800146	0.160838	0.267714	1.10612	0.723378	0.188318	0.854077	0.95616	1.42255	1.05573	0.714958	0.363931	0.735617
EDI	2	7	51	51	2	272EDI	020FP2	1.90785	1.89962	1.88201	1.68971	1.90013	1.84e-07	8.7e-08	1.52e-07	3.81e-08	4.35e-08	1.22e-07	NaN	1.50395	0.712042	1.24486	0.311872	0.355602	1.25034	0.995622	0.3489	0.893872	0.987811	1.5225	1.02211	0.696641	0.418299	0.850114
EDI	1	9	65	65	1	191EDI	004FP1	1.86813	1.89054	1.87135	1.70021	1.87385	4.58e-07	5.11e-07	3.58e-07	4.44e-08	4.32e-07	4.82e-07	NaN	0.949814	1.06068	0.741993	0.0920811	0.896171	0.876494	0.846547	0.227034	0.405582	1.11778	0.849735	0.921858	1.15059	0.389836	2.29884
EDI	2	9	65	65	1	291EDI	004FP2	1.87305	1.89591	1.87559	1.74662	1.87864	4.26e-08	3.5e-08	2.19e-08	2.22e-09	3.91e-08	3.8e-08	Bad UBC	1.12099	0.920639	0.575208	0.0584586	1.02996	1.28987	0.445941	0.0723901	0.807549	1.02024	1.09875	0.833748	1.10422	0.240781	4.2776
EDI	3	9	65	65	1	391EDI	004FP2	1.87305	1.89591	1.87559	1.74662	1.87864	2.29e-06	1.63e-06	1.13e-06	5.21e-08	1.48e-06	1.9e-06	NaN	1.20338	0.855358	0.596931	0.0274308	0.776765	1.28987	0.462782	0.0723901	0.37893	1.02024	1.1795	0.833748	1.02592	0.240781	3.22602
EDI	1	9	65	65	2	192EDI	013FP2	1.89904	1.90271	1.9034	1.70761	1.889	3.5e-07	7.43e-07	1.64e-07	2.28e-08	2.51e-07	4.98e-07	NaN	0.702132	1.49139	0.329991	0.0457621	0.503931	0.764524	0.431629	0.233327	0.196128	0.946251	0.742014	1.13119	1.31843	0.356246	1.41456
EDI	3	9	65	65	2	392EDI	014FP1	1.89092	1.8987	1.87583	1.68581	1.89428	5.43e-07	3.9e-07	2.45e-07	3.2e-08	2.5e-07	4.38e-07	NaN	1.24207	0.891496	0.559649	0.073122	0.572482	1.19098	0.469907	0.405493	0.180329	1.29674	0.95784	0.844208	1.05601	0.417674	1.37064
EDI	2	9	65	65	2	292EDI	015FP2	1.90353	1.89417	1.87892	1.71913	1.89298	4.43e-07	4.69e-07	5.08e-07	5.23e-08	3.59e-07	4.55e-07	NaN	0.972573	1.02947	1.115	0.114949	0.787802	1.04908	1.06284	0.205684	0.558861	1.0516	0.924853	0.968382	1.06308	0.366226	2.15114
EDI	1	11	79	79	1	1111EDI	006FP3	1.87135	1.88785	1.86674	1.72318	1.88094	1.77e-06	8.18e-07	1.19e-07	2e-08	5.2e-07	1.18e-06	NaN	1.50078	0.693949	0.101116	0.0169396	0.44076	2.43184	0.04158	0.367617	0.0460796	3.40765	0.440415	1.5644	0.443589	1.03782	0.424696
EDI	3	11	79	79	2	3112EDI	014FP4	1.87992	1.91971	1.87856	1.70837	1.88699	1.01e-06	8.74e-07	3.01e-07	4.04e-08	7.53e-07	9.1e-07	NaN	1.1063	0.959573	0.331158	0.0444058	0.827246	1.09719	0.301824	0.241073	0.184201	1.21167	0.913038	0.869193	1.10398	0.360863	2.29241
EDI	2	11	79	79	2	2112EDI	015FP3	1.89281	1.89762	1.89592	1.71722	1.92113	1.29e-06	9.66e-07	7.71e-08	1.39e-08	3.61e-07	1.09e-06	NaN	1.17631	0.884479	0.0706023	0.0127254	0.330015	0.898213	0.0786031	0.195903	0.0649576	1.17831	0.998304	0.874314	1.01163	0.28899	1.14196
EDI	3	14	114	114	2	3142EDI	015FP2	1.90353	1.89417	1.87892	NaN	1.89298	4.58e-07	8.91e-07	8.68e-09	NaN	5.29e-07	6.32e-07	Missing values	0.724476	1.41061	0.0137343	NaN	0.836592	1.04908	0.0130918	0.205684	NaN	1.0516	0.688929	0.968382	1.45666	0.366226	2.28436
EDI	1	14	114	114	1	1141EDI	016FP6	1.8662	1.90549	1.89735	1.72908	1.88794	1.49e-06	8.09e-07	5.39e-09	8.05e-10	4.48e-07	1.08e-06	NaN	1.38532	0.750648	0.0050049	0.000746999	0.416142	0.773496	0.0064705	0.122447	0.00610058	1.33059	1.04113	0.748278	1.00317	0.401535	1.03638
EDI	2	14	114	114	1	2141EDI	017FP2	1.88289	1.8966	1.87626	1.68928	1.90023	4.34e-07	3.8e-07	4.16e-09	7.82e-10	3.42e-07	3.99e-07	NaN	1.08726	0.9511	0.0104179	0.00195835	0.855282	1.07709	0.00967232	0.291836	0.00671046	1.1308	0.961492	0.896035	1.06145	0.346238	2.47022
EDI	3	14	114	114	1	3141EDI	018FP1	1.87818	1.88808	1.8758	1.73444	1.88665	1.52e-06	9.95e-07	3.62e-08	3.98e-09	9.69e-07	1.21e-06	NaN	1.24992	0.819532	0.0298482	0.00327693	0.79794	0.884537	0.0337445	0.115537	0.0283626	1.0584	1.18095	0.897426	0.913204	0.344665	2.31512
EDI	1	14	114	114	2	1142EDI	019FP2	1.90057	1.87824	1.87982	1.7141	1.89634	2.16e-06	1.74e-06	5.07e-09	1.81e-08	9.31e-07	1.92e-06	NaN	1.12467	0.903616	0.0026351	0.00938233	0.483902	1.10612	0.00238228	0.188318	0.0498217	0.95616	1.17623	1.05573	0.85592	0.363931	1.32965
EDI	2	14	114	114	2	2142EDI	020FP3	1.8778	1.90697	1.86206	1.71413	1.91182	9.47e-07	8.3e-07	2.01e-08	1.06e-09	4.16e-07	8.75e-07	NaN	1.08292	0.948904	0.022928	0.00121173	0.476046	1.48009	0.015491	0.190239	0.00636955	1.2726	0.850952	0.79661	1.19118	0.297273	1.60138
EDI	2	15	128	128	1	2151EDI	014FP1	1.89092	1.8987	1.87583	1.68581	1.89428	1.11e-06	7.52e-07	1.35e-09	1.49e-09	3.6e-07	8.82e-07	NaN	1.26241	0.852763	0.00153296	0.00168513	0.407768	1.19098	0.00128715	0.405493	0.00415576	1.29674	0.973523	0.844208	1.01013	0.417674	0.976284
EDI	3	15	128	128	1	3151EDI	015FP1	1.88579	1.88749	1.87612	1.70145	1.88913	1.04e-06	1.08e-06	2.17e-09	7.36e-10	6.44e-07	1.05e-06	NaN	0.99138	1.02908	0.0020728	0.000702179	0.61381	1.15935	0.00178789	0.301099	0.00233205	1.24228	0.798035	0.860931	1.19531	0.463419	1.32453
EDI	2	15	128	128	2	2152EDI	017FP3	1.87941	1.89809	1.85559	NaN	1.89286	3.04e-07	2.47e-07	2.05e-09	NaN	1.4e-07	2.69e-07	Missing values	1.12979	0.917434	0.00761683	NaN	0.518389	1.42603	0.0053413	0.239244	NaN	1.16481	0.969934	0.874626	1.04894	0.398456	1.30099
EDI	3	15	128	128	2	3152EDI	018FP2	1.88126	1.88502	1.87016	NaN	1.89438	5.88e-07	2.81e-07	1.19e-09	NaN	4.29e-07	3.99e-07	Missing values	1.47286	0.704304	0.00297628	NaN	1.0729	1.1424	0.00260529	0.29813	NaN	1.16813	1.26087	0.866349	0.812956	0.404033	2.65547
EDI	1	15	128	128	2	1152EDI	020FP3	1.8778	1.90697	1.86206	1.71413	1.91182	1.73e-06	9.83e-07	2.01e-09	2e-09	5.01e-07	1.28e-06	NaN	1.35083	0.766857	0.00156793	0.00156258	0.39049	1.48009	0.00105935	0.190239	0.0082138	1.2726	1.06147	0.79661	0.96265	0.297273	1.31357
EDI	1	13	100	100	1	1131EDI	004FP3	1.87999	1.89718	1.86015	NaN	1.88538	6.41e-09	1.02e-08	8.15e-10	NaN	7.95e-09	7.84e-09	Bad UBC	0.818226	1.3007	0.104003	NaN	1.01404	1.28987	NaN	NaN	NaN	NaN	NaN	NaN	NaN	NaN	NaN
EDI	2	13	100	100	1	2131EDI	005FP1	1.87074	1.88866	1.86393	1.73025	1.87136	4.8e-07	5.02e-07	2.3e-08	6.91e-10	3.93e-07	4.89e-07	NaN	0.983065	1.0264	0.0471139	0.00141408	0.80486	0.87872	0.0536165	0.123899	0.0114132	0.989991	0.993004	1.01214	1.01408	0.335857	2.39643
EDI	3	13	100	100	1	3131EDI	005FP1	1.87074	1.88866	1.86393	1.73025	1.87136	8.61e-07	8.53e-07	4.89e-08	1.83e-09	5.19e-07	8.49e-07	NaN	1.01479	1.00491	0.0576634	0.00215907	0.611778	0.87872	0.0656221	0.123899	0.0174261	0.989991	1.02505	1.01214	0.992857	0.335857	1.82154
EDI	2	13	100	100	2	2132EDI	017FP2	1.88289	1.8966	1.87626	1.68928	1.90023	7.52e-07	5.75e-07	2.6e-08	5.03e-09	4.76e-07	6.49e-07	NaN	1.15856	0.886101	0.0401404	0.00775884	0.73412	1.07709	0.0372676	0.291836	0.0265863	1.1308	1.02455	0.896035	0.988914	0.346238	2.12028
EDI	3	13	100	100	2	3132EDI	018FP2	1.88126	1.88502	1.87016	1.68571	1.89438	6.42e-07	6.21e-07	2.7e-08	6.06e-09	5.01e-07	6.29e-07	NaN	1.02053	0.986827	0.042978	0.00962638	0.796417	1.1424	0.0376207	0.29813	0.0322892	1.16813	0.873644	0.866349	1.13906	0.404033	1.97117
EDI	1	13	100	100	2	1132EDI	019FP3	1.89621	1.89562	1.88374	1.70489	1.9038	2.83e-07	3.65e-07	7.56e-09	1.01e-09	2.35e-07	3.18e-07	NaN	0.888084	1.14624	0.0237553	0.00318656	0.737508	1.05274	0.0225653	0.249768	0.0127581	1.07757	0.824152	0.937987	1.22202	0.358514	2.05713
EDI	1	17	156	156	1	1171 EDI	T17 FP1	1.87875	1.87217	1.86863	1.69041	1.87207	7.23e-07	7.38e-07	1.57e-09	1.32e-09	6.15e-07	7.3e-07	NaN	0.990327	1.00977	0.00215071	0.00180585	0.842568	1.15354	0.00186445	0.232756	0.00775855	1.0991	0.901035	0.909836	1.10983	0.455106	1.85137
EDI	2	17	156	156	1	2171 EDI	T17 FP2	1.86756	1.86273	1.86623	1.68869	1.87493	1.1e-06	5.57e-07	3.55e-09	1.83e-09	1.88e-07	7.82e-07	NaN	1.40485	0.711822	0.00453764	0.00233602	0.239941	1.06957	0.00424249	0.222511	0.0104985	1.08395	1.29604	0.922548	0.771582	0.377291	0.635957
EDI	3	17	156	156	1	3171 EDI	T17 FP3	1.87141	1.85894	1.87842	1.70743	1.8995	9.84e-07	9.04e-07	8.4e-10	6.36e-10	3.68e-07	9.43e-07	NaN	1.04324	0.958548	0.000890371	0.000674606	0.390191	0.995003	0.000894842	0.154747	0.00435941	1.11643	0.934447	0.895712	1.07015	0.26627	1.4654
EDI	1	17	156	156	2	1172 EDI	T17 FP3	1.87141	1.85894	1.87842	1.70743	1.8995	2.27e-06	1.1e-06	4.42e-10	9.9e-10	2.25e-07	1.58e-06	NaN	1.43525	0.696742	0.000279151	0.000625877	0.142538	0.995003	0.000280553	0.154747	0.00404451	1.11643	1.28557	0.895712	0.777864	0.26627	0.535314
EDI	2	17	156	156	2	2172 EDI	T17 FP4	1.88299	1.87427	1.85002	1.70246	1.88145	9.73e-07	4.12e-07	3.47e-10	NaN	3.27e-07	6.33e-07	NaN	1.5373	0.650491	0.00054848	NaN	0.517157	1.50587	0.000364228	0.211762	NaN	1.01314	1.51737	0.987035	0.659036	0.357668	1.44591
EDI	3	17	156	156	2	3172 EDI	T17 FP4	1.88299	1.87427	1.85002	1.70246	1.88145	6.09e-07	2.46e-07	1.17e-09	1.1e-09	1.33e-07	3.87e-07	NaN	1.5724	0.635972	0.00303044	0.00284124	0.344309	1.50587	0.00201242	0.211762	0.0134172	1.01314	1.55201	0.987035	0.644326	0.357668	0.962649
EDI	22	22C 13WT10	110	100	2	H8	003 007 FP2	2.123	2.1085	2.249	1.432	2.421	3.5e-07	3.19e-07	2.96e-09	3.25e-10	2.75e-08	3.34e-07	NaN	1.04791	0.954276	0.00886508	0.000971955	0.0823347	0.892497	0.00993291	0.051175	0.0189928	1.01475	1.03269	0.985468	0.968348	0.362457	0.227157
EDI	22	22C 13WT10	110	100	1	13WT10221EDI	006FP2	1.88265	1.89284	1.87491	1.75695	1.87568	1.66e-06	1.56e-06	3.41e-09	8.14e-10	7.8e-08	1.59e-06	NaN	1.04816	0.985437	0.00214791	0.000512878	0.0491287	0.865121	0.00248278	0.0688171	0.00745277	1.00911	1.0387	0.999189	0.986237	0.389581	0.126107
EDI	22	22C 8WT10	75	65	2	8WT10222EDI	005FP2	1.87738	1.895	1.87672	1.73259	1.86768	1.31e-07	1.84e-07	1.51e-08	3.23e-09	5.09e-09	1.51e-07	NaN	0.864457	1.2178	0.0993475	0.021352	0.0336262	0.850419	0.116822	0.142996	0.149319	1.08724	0.795093	0.937791	1.29859	0.424808	0.0791563
EDI	22	22C 8WT10	75	65	1	8WT10221EDI	005FP3	1.86287	1.89244	1.86343	1.73985	1.84872	3.02e-07	3e-07	3.74e-07	2.07e-08	7.26e-10	2.95e-07	NaN	1.02509	1.01543	1.26897	0.0702498	0.00246199	0.90024	1.40959	0.110318	0.636792	1.19392	0.85859	0.864443	1.17467	0.476702	0.00516463
EDI	22	22C 8WT10	75	65	3	8WT10223EDI	006FP1	1.87535	1.8943	1.86145	NaN	1.85957	5.74e-08	3.23e-08	5.08e-09	NaN	1.93e-09	4.24e-08	Missing values	1.35252	0.760498	0.119741	NaN	0.0455086	1.07759	0.111119	0.164461	NaN	1.2976	1.04233	0.810554	0.938245	0.573216	0.0793917
EDI	3	3	23	23	1	331EDI	002FP2	1.87118	1.89254	1.89011	1.72422	1.87263	6.85e-08	6.59e-08	1.65e-07	2.6e-08	2.56e-09	6.69e-08	NaN	1.02344	0.984074	2.46378	0.388976	0.0382211	0.715707	3.44243	0.162288	2.39682	1.26694	0.807809	0.833998	1.17995	0.456103	0.0837994
EDI	1	3	23	23	1	131EDI	001FP3	1.88776	1.90249	1.88946	1.76783	1.87991	9.13e-07	3.19e-07	7.22e-07	5.55e-08	3.14e-08	5.37e-07	NaN	1.69954	0.593434	1.34446	0.103303	0.0585047	0.906749	1.48272	0.0776456	1.33045	1.09732	1.54881	0.95644	0.620462	0.455825	0.128349
EDI	2	3	23	23	1	231EDI	002FP1	1.87608	1.89537	1.88205	1.72199	1.8543	2.86e-07	2.78e-07	3.42e-07	6.76e-08	1.22e-08	2.77e-07	NaN	1.03134	1.00285	1.23169	0.243518	0.0441188	0.75207	1.63774	0.1661	1.46609	1.07309	0.961094	0.946048	1.06004	0.564559	0.0781473
EDI	3	3	23	23	2	332EDI	009FP2	1.86867	1.88053	1.87899	1.73996	1.85198	1.35e-06	7.42e-07	1.441e-06	2.2e-07	3.71e-08	9.93e-07	NaN	1.36493	0.747755	1.45182	0.221981	0.0373401	0.70459	2.06052	0.0982326	2.25975	1.01537	1.34426	1.02179	0.731808	0.432925	0.0862506
EDI	1	3	23	23	2	132EDI	011FP1	1.875	1.88906	1.8814	1.72278	1.84935	7.7e-07	6.22e-07	1.22e-06	1.18e-07	3.38e-08	6.74e-07	NaN	1.14309	0.922707	1.81347	0.174841	0.0501578	0.780389	2.32381	0.143972	1.2144	1.28092	0.892401	0.830475	1.11106	0.596948	0.0840237
EDI	2	3	23	23	2	232EDI	012FP2	1.88245	1.87766	1.86989	1.71715	1.85858	1.46e-06	3.47e-07	1.12e-06	1.97e-07	2.81e-08	7e-07	NaN	2.08097	0.494954	1.59874	0.281277	0.0401408	0.81933	1.95128	0.130602	2.15369	0.892982	2.33036	1.13319	0.436778	0.43295	0.0927145
EDI	8	8C 13WT10	90	100	1	13WT1081EDI	010FP3	1.88543	1.88372	1.85925	1.72716	1.86435	1.27e-06	5.71e-07	4.57e-09	1.08e-09	5.58e-07	8.5e-07	NaN	1.49301	0.671603	0.00537992	0.001276	0.656441	1.19145	0.00451545	0.168392	0.00757759	0.997579	1.49663	1.08388	0.61963	0.54746	1.19907
EDI	8	8C 13WT10	90	100	2	13WT1082EDI	011FP3	1.88881	1.88016	1.85109	1.72167	1.88629	5.07e-07	8.72e-07	1.05e-08	6.62e-10	1.53e-07	6.5e-07	NaN	0.77951	1.34174	0.0161066	0.00101787	0.234568	1.26525	0.0127299	0.146125	0.00696573	1.02585	0.759866	1.00505	1.335	0.359094	0.653223
EDI	8	8C 13WT10	90	100	3	13WT1083EDI	012FP3	1.8895	1.90192	1.85731	1.72452	1.89094	1.76e-06	1.53e-06	3.53e-08	2.58e-09	7.21e-07	1.61e-06	NaN	1.08958	0.948246	0.0219312	0.00160105	0.447214	1.17866	0.0186068	0.176063	0.00909363	1.0656	1.02251	0.963561	0.984106	0.358734	1.24665
EDI	8	8C 8WT10	55	65	2	E7	007 008 FP4	1.766	2.023	2.023	1.205	2.5	6.9e-09	2.1e-08	6.87e-10	NaN	3.28e-09	1.2e-08	Bad UBC	0.573397	1.74399	0.0570972	NaN	0.27271	0.915093	0.0623951	0.0815395	NaN	0.901006	0.636396	1.10987	1.57135	0.46306	0.588931
EDI	8	8C 8WT10	55	65	3	8WT1083EDI	009FP3	1.87988	1.88296	1.87016	1.71813	1.87523	2.8e-07	2.02e-07	4.72e-08	7.26e-09	1.34e-07	2.37e-07	NaN	1.18515	0.852472	0.199388	0.0306766	0.565267	0.972884	0.204945	0.13649	0.224753	0.935877	1.26636	1.08637	0.784698	0.321839	1.75637
EDIN	1	1	9	9	1	111EDIN	006FP2	NaN	1.89284	1.87491	1.75695	1.87568	NaN	1.56e-08	1.57e-09	3.25e-09	3.87e-10	1.56e-08	Bad UBC	NaN	1.00014	0.100948	0.208677	0.0248936	0.865121	0.116686	0.0688171	3.03234	1.00911	NaN	0.999189	1.00095	0.389581	0.0638983
EDIN	2	1	9	9	2	212EDIN	010FP1	1.8647	1.8809	1.87955	1.72822	1.85484	4.02e-08	2.61e-08	6.9e-08	1.88e-08	5.22e-10	3.23e-08	Bad UBC	1.24606	0.808409	2.13648	0.583256	0.0161706	0.714524	2.99008	0.110966	5.25616	1.045	1.1924	1.0011	0.807519	0.484065	0.0334058
EDIN	3	1	9	9	2	312EDIN	011FP1	1.875	1.88906	1.8814	1.72278	1.84935	3.79e-08	6.84e-08	8.83e-08	2.3e-08	1.06e-09	4.98e-08	NaN	0.761231	1.37145	1.77123	0.460938	0.0213666	0.780389	2.26968	0.143972	3.20157	1.28092	0.594286	0.830475	1.6514	0.596948	0.0357931
EDIN	1	1	9	9	2	352EDIN112	012FP3	1.8895	1.90192	1.85731	1.72452	1.89094	4.08e-09	2.14e-09	1.41e-08	4.5e-09	1.85e-10	2.92e-09	Bad UBC, order of magnitude (VIN3)	1.39785	0.732235	4.82119	1.54292	0.0634991	NaN	NaN	NaN	NaN	NaN	NaN	NaN	NaN	NaN	NaN
EDIN	1	2	16	16	1	121EDIN	001FP1	1.86774	1.90213	1.87451	1.71119	1.84445	3.57e-07	2.2e-07	7.9e-07	1.49e-07	5.26e-09	2.59e-07	NaN	1.37747	0.847639	3.04671	0.574003	0.0202829	0.880708	3.45939	0.192921	2.97533	1.13909	1.20928	0.889496	0.952943	0.67031	0.030259
EDIN	2	2	16	16	1	221EDIN	001FP1	1.86774	1.90213	1.87451	1.71119	1.84445	3.37e-08	4.52e-08	1.17e-07	1.59e-08	5.2e-10	3.81e-08	NaN	0.884189	1.18607	3.06488	0.416366	0.0136358	0.880708	3.48002	0.192921	2.15822	1.13909	0.776227	0.889496	1.33342	0.67031	0.0203425
EDIN	3	2	16	16	1	321EDIN	001FP3	1.88776	1.90249	1.88946	1.76783	1.87991	3.83e-08	6.49e-08	8.64e-08	1.48e-08	1.22e-10	4.86e-08	NaN	0.788997	1.33548	1.77783	0.304189	0.00251714	0.906749	1.96066	0.0776456	3.91766	1.09732	0.719024	0.95644	1.3963	0.455825	0.00552216
EDIN	2	2	16	16	2	222EDIN	009FP2	1.86867	1.88053	1.87899	1.73996	1.85198	4.19e-07	1.99e-07	3e-07	7.41e-08	3.07e-09	2.77e-07	NaN	1.51187	0.717636	1.0797	0.267102	0.0110736	0.70459	1.53238	0.0982326	2.71908	1.01537	1.48898	1.02179	0.702332	0.432925	0.0255784
EDIN	3	2	16	16	2	322EDIN	010FP1	1.8647	1.8809	1.87955	1.72822	1.85484	4.35e-08	1.86e-08	4.64e-08	8.52e-09	1.88e-10	2.83e-08	Bad UBC	1.53657	0.656128	1.63759	0.300968	0.00664133	0.714524	2.29187	0.110966	2.71225	1.045	1.4704	1.0011	0.655405	0.484065	0.0137199
EDIN	1	2	16	16	2	122EDIN	012FP1	1.88099	1.89659	1.87632	1.72076	1.85176	5.37e-08	2.6e-08	1.45e-07	2.35e-08	2.95e-10	3.73e-08	NaN	1.44152	0.697502	3.90347	0.630967	0.00790868	0.784247	4.97734	0.146598	4.30406	1.05045	1.37228	0.966884	0.721392	0.531422	0.0148821
EDIN	1	5	37	37	1	151EDIN	002FP2	1.87118	1.89254	1.89011	1.72422	1.87263	2.86e-07	2.47e-07	2.52e-07	5.72e-08	3.85e-08	2.59e-07	NaN	1.10739	0.95369	0.973498	0.221185	0.149027	0.715707	1.36019	0.162288	1.36292	1.26694	0.87407	0.833998	1.14352	0.456103	0.326741
EDIN	3	5	37	37	1	251EDIN	002FP3	1.88057	1.90335	1.89829	1.7732	1.88871	1.34e-06	9.11e-07	5.17e-07	2.95e-08	4.08e-08	1.07e-06	NaN	1.24915	0.850164	0.482284	0.0275584	0.0380891	0.69207	0.696871	0.0619552	0.444813	1.04029	1.20077	0.981386	0.86629	0.33273	0.114475
EDIN	1	5	37	37	2	152EDIN	010FP3	1.88543	1.88372	1.85925	1.72716	1.86435	4.77e-07	2.41e-07	6.16e-07	9.95e-08	2.71e-08	3.37e-07	NaN	1.41778	0.71607	1.8287	0.295528	0.0804319	1.19145	1.53486	0.168392	1.755	0.997579	1.42122	1.08388	0.660655	0.54746	0.146918
EDIN	3	5	37	37	2	252EDIN	011FP2	1.88374	1.88426	1.87076	1.72274	1.86785	5.85e-07	8.11e-07	7.8e-07	1.4e-07	5.96e-08	6.76e-07	NaN	0.865197	1.19868	1.15336	0.207115	0.0880709	0.937812	1.22984	0.148047	1.39898	1.08108	0.80031	0.96236	1.24556	0.411209	0.214176
EDIN	2	5	37	37	2	352EDIN	012FP2	1.88245	1.87766	1.86989	1.71715	1.85858	7.24e-07	8.69e-07	1.49e-06	1.92e-07	5.22e-08	7.82e-07	NaN	0.925366	1.11059	1.91033	0.24501	0.0667572	0.81933	2.33158	0.130602	1.876	0.892982	1.03626	1.13319	0.980054	0.43295	0.154191
EDIN	1	7	51	51	1	G3	003 007 FP1	1.87329	1.89506	1.87916	1.73378	1.87786	3.8e-07	6.3e-07	6.3e-07	9.58e-08	1.63e-07	4.89e-07	NaN	0.776074	1.28854	1.28704	0.195801	0.333629	0.982724	1.30967	0.181607	1.07816	1.17757	0.659048	0.849207	1.51734	0.514649	0.648266
EDIN	3	7	51	51	1	F6	003 007 FP2	2.123	2.1085	2.249	1.432	2.421	3.33e-07	2.74e-07	3.13e-07	1.62e-08	1.16e-07	3.02e-07	NaN	1.10195	0.907479	1.03607	0.053503	0.384897	0.892497	1.16087	0.051175	1.04549	1.01475	1.08594	0.985468	0.92086	0.362457	1.06191
EDIN	3	7	51	51	2	372EDIN	016FP7	1.89644	1.88728	1.89109	1.70604	1.89299	4.95e-07	1.03e-06	5.87e-07	1.11e-07	1.07e-07	7.06e-07	NaN	0.701276	1.45529	0.831667	0.157589	0.151301	0.661754	1.25676	0.145177	1.08549	0.87103	0.805112	1.21042	1.2023	0.287181	0.52685
EDIN	1	7	51	51	2	172EDIN	019FP2	1.90057	1.87824	1.87982	1.7141	1.89634	1.21e-06	7.79e-07	5.62e-07	5e-08	1.28e-07	9.54e-07	NaN	1.26425	0.816185	0.589631	0.0523808	0.134685	1.10612	0.53306	0.188318	0.278151	0.95616	1.32222	1.05573	0.773103	0.363931	0.370084
EDIN	2	7	51	51	2	272EDIN	020FP2	1.90785	1.89962	1.88201	1.68971	1.90013	1.81e-07	1.29e-07	1.59e-07	2.84e-08	2.54e-08	1.5e-07	NaN	1.21084	0.860257	1.06103	0.189559	0.169595	1.25034	0.848596	0.3489	0.543304	0.987811	1.22579	1.02211	0.84165	0.418299	0.40544
EDIN	1	9	65	65	1	191EDIN	004FP1	1.86813	1.89054	1.87135	1.70021	1.87385	3.47e-07	2.64e-07	2.07e-07	1.22e-08	3.78e-07	2.99e-07	NaN	1.1611	0.883431	0.694735	0.040928	1.26748	0.876494	0.79263	0.227034	0.180272	1.11778	1.03875	0.921858	0.958316	0.389836	3.25133
EDIN	2	9	65	65	1	291EDIN	004FP2	1.87305	1.89591	1.87559	1.74662	1.87864	5.22e-07	4.07e-07	2.17e-07	1.81e-08	3.45e-07	4.55e-07	NaN	1.14823	0.895202	0.476292	0.0398265	0.758914	1.28987	0.369255	0.0723901	0.550165	1.02024	1.12544	0.833748	1.07371	0.240781	3.15189
EDIN	3	9	65	65	1	391EDIN	004FP2	1.87305	1.89591	1.87559	1.74662	1.87864	5.43e-07	5.17e-07	2.32e-07	8.01e-09	4.44e-07	5.23e-07	NaN	1.03824	0.987744	0.442422	0.0153127	0.847787	1.28987	0.342996	0.0723901	0.21153	1.02024	1.01764	0.833748	1.1847	0.240781	3.52099
EDIN	1	9	65	65	2	192EDIN	013FP2	1.89904	1.90271	1.9034	1.70761	1.889	6.62e-07	1.028e-06	3.88e-07	5.46e-08	1e-06	8.22e-07	NaN	0.80622	1.25114	0.472446	0.0663959	1.2172	0.764524	0.617961	0.233327	0.284561	0.946251	0.852015	1.13119	1.10604	0.356246	3.41674
EDIN	3	9	65	65	2	392EDIN	014FP1	1.89092	1.8987	1.87583	1.68581	1.89428	1.63e-07	2.54e-07	1.71e-07	2.18e-08	1.54e-07	2.01e-07	NaN	0.814399	1.26758	0.851553	0.108788	0.768042	1.19098	0.715004	0.405493	0.268285	1.29674	0.628034	0.844208	1.50151	0.417674	1.83886
EDIN	2	9	65	65	2	292EDIN	015FP1	1.88579	1.88749	1.87612	1.70145	1.88913	9.79e-07	1.1e-06	6.54e-07	9.68e-08	8.17e-07	1.02e-06	NaN	0.96	1.0738	0.641368	0.0949429	0.801006	1.15935	0.553211	0.301099	0.315321	1.24228	0.772774	0.860931	1.24725	0.463419	1.72847
EDIN	1	11	79	79	1	1111EDIN	006FP3	1.87135	1.88785	1.86674	1.72318	1.88094	1.28e-06	1.14e-06	1.38e-07	1.37e-08	5.4e-07	1.17e-06	NaN	1.0937	0.980061	0.118307	0.0117111	0.462293	2.43184	0.0486491	0.367617	0.0318568	3.40765	0.320954	1.5644	0.626478	1.03782	0.445444
EDIN	3	11	79	79	1	B4	007 008 FP4	1.766	2.023	2.023	1.205	2.5	4.77e-07	5.89e-07	2.98e-08	2.76e-09	4e-07	5.3e-07	NaN	0.899932	1.1112	0.0562982	0.00521368	0.755926	0.915093	0.0615219	0.0815395	0.0639406	0.901006	0.998807	1.10987	1.00119	0.46306	1.63246
EDIN	3	11	79	79	2	3112EDIN	014FP4	1.87992	1.91971	1.87856	1.70837	1.88699	1.09e-06	7.51e-07	2.16e-07	1.99e-08	8.18e-07	9.01e-07	NaN	1.21333	0.833261	0.240102	0.0221181	0.907975	1.09719	0.218833	0.241073	0.0917487	1.21167	1.00137	0.869193	0.958661	0.360863	2.51612
EDIN	2	11	79	79	2	2112EDIN	015FP3	1.89281	1.89762	1.89592	1.71722	1.92113	1.12e-06	7.75e-07	9.83e-08	1.01e-08	2.46e-07	8.88e-07	NaN	1.26567	0.872507	0.110742	0.0113893	0.277401	0.898213	0.123291	0.195903	0.0581376	1.17831	1.07414	0.874314	0.997933	0.28899	0.959897
EDIN	3	14	114	114	2	3142EDIN	015FP3	1.89281	1.89762	1.89592	1.71722	1.92113	1.16e-06	1.34e-06	1.82e-08	1.16e-09	1.33e-06	1.21e-06	NaN	0.95208	1.10357	0.0149948	0.000956877	1.09319	0.898213	0.016694	0.195903	0.00488444	1.17831	0.808002	0.874314	1.26221	0.28899	3.7828
EDIN	1	14	114	114	1	1141EDIN	016FP1	1.86993	1.90488	1.87282	1.61217	1.88073	4.78e-07	8.17e-07	2e-09	9.23e-09	4.2e-07	6.13e-07	NaN	0.781129	1.33296	0.00325917	0.0150668	0.684845	0.841387	0.00387357	1.23341	0.0122155	1.11887	0.698139	0.887676	1.50163	0.360456	1.89994
EDIN	2	14	114	114	1	2141EDIN	017FP2	1.88289	1.8966	1.87626	1.68928	1.90023	3.6e-07	3.59e-07	5e-09	9.59e-10	3.88e-07	3.56e-07	NaN	1.00981	1.00749	0.0140436	0.00269281	1.08865	1.07709	0.0130385	0.291836	0.00922715	1.1308	0.893005	0.896035	1.12439	0.346238	3.14422
EDIN	3	14	114	114	1	3141EDIN	018FP1	1.87818	1.88808	1.8758	1.73444	1.88665	4.3e-06	1.06e-06	1.48e-09	9.43e-10	1.96e-06	2.11e-06	NaN	2.03236	0.501764	0.000698056	0.000446276	0.925423	0.884537	0.000789177	0.115537	0.00386263	1.0584	1.92021	0.897426	0.559115	0.344665	2.685
EDIN	1	14	114	114	2	1142EDIN	019FP2	1.90057	1.87824	1.87982	1.7141	1.89634	1.22e-06	1.21e-06	2.02e-09	1.81e-08	1.14e-06	1.19e-06	NaN	1.02293	1.01843	0.00169154	0.0151813	0.959782	1.10612	0.00152925	0.188318	0.0806153	0.95616	1.06983	1.05573	0.964677	0.363931	2.63726
EDIN	2	14	114	114	2	2142EDIN	020FP3	1.8778	1.90697	1.86206	1.71413	1.91182	4.47e-06	2.17e-06	8.46e-08	1.1e-09	1.67e-06	3.09e-06	NaN	1.44653	0.703392	0.0273901	0.000356741	0.541272	1.48009	0.0185057	0.190239	0.00187523	1.2726	1.13668	0.79661	0.882982	0.297273	1.82079
EDIN	2	15	128	128	1	2151EDIN	014FP1	1.89092	1.8987	1.87583	1.68581	1.89428	7.72e-07	6.22e-07	1.93e-09	1.89e-09	5.79e-07	6.69e-07	NaN	1.15375	0.930051	0.00289111	0.00281941	0.866008	1.19098	0.00242752	0.405493	0.00695303	1.29674	0.889727	0.844208	1.10168	0.417674	2.07341
EDIN	3	15	128	128	1	3151EDIN	015FP1	1.88579	1.88749	1.87612	1.70145	1.88913	1.03e-06	1.71e-06	6.57e-09	1.35e-09	9.92e-07	1.3e-06	NaN	0.791778	1.31617	0.00504737	0.00103858	0.761681	1.15935	0.0043536	0.301099	0.00344931	1.24228	0.63736	0.860931	1.52877	0.463419	1.64361
EDIN	2	15	128	128	2	2152EDIN	017FP3	1.87941	1.89809	1.85559	NaN	1.89286	5.26e-07	3.7e-07	3.04e-09	NaN	3.63e-07	4.37e-07	Missing values	1.20357	0.847386	0.00696506	NaN	0.831385	1.42603	0.00488425	0.239244	NaN	1.16481	1.03328	0.874626	0.968855	0.398456	2.08652
EDIN	3	15	128	128	2	3152EDIN	018FP2	1.88126	1.88502	1.87016	1.68571	1.89438	4.66e-07	2.86e-07	1.24e-09	1.71e-08	2.34e-07	3.54e-07	NaN	1.31879	0.810101	0.00349764	0.0484395	0.661037	1.1424	0.00306165	0.29813	0.162478	1.16813	1.12898	0.866349	0.935074	0.404033	1.6361
EDIN	1	15	128	128	2	1152EDIN	020FP3	1.8778	1.90697	1.86206	1.71413	1.91182	4.83e-07	1.6e-07	5.03e-10	1.18e-09	3.17e-07	2.77e-07	NaN	1.74597	0.578106	0.00181694	0.0042701	1.1457	1.48009	0.00122759	0.190239	0.022446	1.2726	1.37198	0.79661	0.725708	0.297273	3.85402
EDIN	1	13	100	100	1	1131EDIN	004FP3	1.87999	1.89718	1.86015	1.72219	1.88538	1.69e-06	2.2e-06	4.91e-08	1.06e-09	1.45e-06	1.87e-06	NaN	0.901858	1.17259	0.0262084	0.000564435	0.772557	1.28987	0.0203186	0.179254	0.0031488	1.25463	0.718827	0.833748	1.40641	0.413129	1.87002
EDIN	2	13	100	100	1	2131EDIN	005FP1	1.87074	1.88866	1.86393	1.73025	1.87136	2.21e-06	2.97e-06	1.66e-07	2.12e-08	2.53e-06	2.53e-06	NaN	0.872526	1.17195	0.0656608	0.00838809	1.00037	0.87872	0.0747232	0.123899	0.0677012	0.989991	0.881347	1.01214	1.15789	0.335857	2.97855
EDIN	3	13	100	100	1	3131EDIN	005FP2	1.87738	1.895	1.87672	1.73259	1.86768	3.15e-07	2.85e-07	1.86e-08	1.31e-09	4.03e-07	2.97e-07	NaN	1.05988	0.961983	0.0627978	0.00439951	1.35756	0.850419	0.0738433	0.142996	0.0307666	1.08724	0.974834	0.937791	1.0258	0.424808	3.19569
EDIN	2	13	100	100	2	2132EDIN	017FP2	1.88289	1.8966	1.87626	1.68928	1.90023	2.04e-07	2.45e-07	2.05e-08	7.22e-09	2.06e-07	2.19e-07	NaN	0.929783	1.11853	0.0936299	0.032889	0.938052	1.07709	0.0869288	0.291836	0.112697	1.1308	0.822235	0.896035	1.24831	0.346238	2.70927
EDIN	3	13	100	100	2	3132EDIN	018FP2	1.88126	1.88502	1.87016	1.68571	1.89438	7.29e-07	5.78e-07	1.48e-08	8.33e-09	4.95e-07	6.36e-07	NaN	1.14636	0.908167	0.0233265	0.0130935	0.778372	1.1424	0.0204189	0.29813	0.0439189	1.16813	0.981365	0.866349	1.04827	0.404033	1.9265
EDIN	1	13	100	100	2	1132EDIN	019FP3	1.89621	1.89562	1.88374	1.70489	1.9038	5.12e-07	4.02e-07	6.34e-09	1.23e-09	3.85e-07	4.49e-07	NaN	1.14109	0.897136	0.014128	0.0027481	0.859261	1.05274	0.0134203	0.249768	0.0110026	1.07757	1.05894	0.937987	0.956448	0.358514	2.39673
EDIN	1	17	156	156	1	1171 EDIN	T17 FP1	1.87875	1.87217	1.86863	1.69041	1.87207	1.29e-06	1.02e-06	1.91e-09	6.98e-10	3.41e-07	1.15e-06	NaN	1.12131	0.891815	0.00166294	0.00060763	0.296636	1.15354	0.0014416	0.232756	0.00261059	1.0991	1.02021	0.909836	0.980193	0.455106	0.651797
EDIN	2	17	156	156	1	2171 EDIN	T17 FP2	1.86756	1.86273	1.86623	1.68869	1.87493	1.45e-06	7.79e-07	3.3e-09	1.9e-09	2.68e-07	1.06e-06	NaN	1.36319	0.733576	0.00311229	0.00178854	0.252561	1.06957	0.00290985	0.222511	0.008038	1.08395	1.2576	0.922548	0.795163	0.377291	0.669404
EDIN	3	17	156	156	1	3171 EDIN	T17 FP2	1.86756	1.86273	1.86623	1.68869	1.87493	2.23e-06	1.81e-06	1.09e-08	5.97e-09	5.89e-07	2.01e-06	NaN	1.10845	0.902164	0.00542319	0.00297298	0.293474	1.06957	0.00507044	0.222511	0.0133611	1.08395	1.02259	0.922548	0.977904	0.377291	0.777844
EDIN	1	17	156	156	2	1172 EDIN	T17 FP3	1.87141	1.85894	1.87842	1.70743	1.8995	2.41e-06	1.15e-06	1.06e-09	3.63e-10	1.97e-07	1.66e-06	NaN	1.4473	0.690942	0.000639854	0.000218328	0.118527	0.995003	0.000643067	0.154747	0.00141087	1.11643	1.29636	0.895712	0.771388	0.26627	0.44514
EDIN	2	17	156	156	2	2172 EDIN	T17 FP4	1.88299	1.87427	1.85002	1.70246	1.88145	1.39e-06	1.08e-07	7.09e-10	5.51e-10	1.09e-07	3.88e-07	NaN	3.58289	0.279104	0.00182723	0.00141864	0.280297	1.50587	0.0012134	0.211762	0.0066992	1.01314	3.53644	0.987035	0.282771	0.357668	0.783679
EDIN	3	17	156	156	2	3172 EDIN	T17 FP5	1.8793	1.89836	1.8706	1.69511	1.88532	1.13e-06	5.86e-07	3.33e-10	5.69e-10	2.26e-07	8.13e-07	NaN	1.38829	0.72031	0.000408938	0.00069941	0.27728	0.856659	0.000477363	0.208815	0.00334943	1.02319	1.35683	0.977339	0.737011	0.261137	1.06182
EDIN	22	22C 13WT10	110	100	1	13WT10221EDIN	006FP1	1.87535	1.8943	1.86145	1.71724	1.85957	1.91e-07	3.74e-07	2.37e-09	1.33e-09	8.19e-09	2.61e-07	NaN	0.734198	1.43356	0.00909286	0.00510872	0.031436	1.07759	0.00843814	0.164461	0.0310635	1.2976	0.565814	0.810554	1.76862	0.573216	0.0548415
EDIN	22	22C 13WT10	110	100	3	C2	007 008 FP4	1.766	2.023	2.023	1.205	2.5	8.14e-07	6.42e-07	2.46e-09	9.2e-11	2.62e-08	7.23e-07	NaN	1.12555	0.888454	0.00340572	0.000127281	0.0362812	0.915093	0.00372172	0.0815395	0.00156098	0.901006	1.24922	1.10987	0.800503	0.46306	0.0783509
EDIN	22	22C 8WT10	75	65	1	8WT10221EDIN	005FP3	1.86287	1.89244	1.86343	1.73985	1.84872	7.5e-07	3.64e-07	1.78e-08	1.26e-09	2.12e-09	5.14e-07	NaN	1.45837	0.706838	0.0346984	0.00244053	0.00413016	0.90024	0.0385435	0.110318	0.0221226	1.19392	1.2215	0.864443	0.817681	0.476702	0.00866404
EDIN	22	22C 8WT10	75	65	2	8WT10222EDIN	005FP3	1.86287	1.89244	1.86343	1.73985	1.84872	3.95e-07	2.17e-07	1.68e-08	2.01e-09	2.16e-09	2.93e-07	NaN	1.34974	0.742033	0.057384	0.00686276	0.0073747	0.90024	0.063743	0.110318	0.0622087	1.19392	1.13051	0.864443	0.858394	0.476702	0.0154703
EDIN	22	22C 8WT10	75	65	3	8WT10223EDIN	006FP1	1.87535	1.8943	1.86145	1.71724	1.85957	4.28e-08	5.9e-08	9.37e-08	1.53e-08	5.69e-09	5.01e-08	NaN	0.853003	1.17701	1.86864	0.305791	0.113427	1.07759	1.7341	0.164461	1.85936	1.2976	0.657371	0.810554	1.4521	0.573216	0.197878
EDIN	22	22C 8WT35	100	65	1	EDIN835221	017FP1	1.87546	1.88935	1.87213	1.69524	1.8794	2.69e-07	2.38e-07	8.43e-09	4.67e-09	4.49e-09	2.49e-07	NaN	1.07751	0.95406	0.0338162	0.0187032	0.018006	1.0257	0.0329691	0.246117	0.0759928	1.18187	0.911695	0.843762	1.13072	0.443765	0.0405755
EDIN	22	22C 8WT35	100	65	2	EDIN 835 22-2	019FP7	1.88187	1.90044	1.90038	1.72628	1.91807	1.52e-06	8.67e-07	2.77e-08	1.06e-08	6.35e-09	1.25e-06	NaN	1.21545	0.692894	0.0221653	0.00844321	0.00507501	0.825716	0.0268438	0.149663	0.0564149	1.12108	1.08417	0.894724	0.774422	0.286746	0.0176986
EDIN	3	3	23	23	1	331COL	002FP2	1.87118	1.89254	1.89011	1.72422	1.87263	2.84e-07	1.23e-07	2.12e-07	7.08e-08	1.33e-09	1.84e-07	NaN	1.54242	0.667632	1.14679	0.383802	0.00719313	0.715707	1.60231	0.162288	2.36494	1.26694	1.21744	0.833998	0.80052	0.456103	0.0157709
EDIN	1	3	23	23	1	131EDIN	001FP3	1.88776	1.90249	1.88946	1.76783	1.87991	8.37e-07	3.93e-07	8.27e-07	3.95e-08	6.2e-09	5.68e-07	NaN	1.47318	0.691925	1.45599	0.0695822	0.0109171	0.906749	1.60573	0.0776456	0.896151	1.09732	1.34253	0.95644	0.723438	0.455825	0.0239501
EDIN	2	3	23	23	1	231EDIN	002FP1	1.87608	1.89537	1.88205	1.72199	1.8543	2e-07	3.09e-07	3.92e-07	5.66e-08	3.21e-09	2.44e-07	NaN	0.819137	1.26287	1.60262	0.231514	0.0131139	0.75207	2.13094	0.1661	1.39382	1.07309	0.763345	0.946048	1.33489	0.564559	0.0232286
EDIN	3	3	23	23	2	332EDIN	009FP3	1.87988	1.88296	1.87016	1.71813	1.87523	1.05e-06	4.46e-07	8.61e-07	1.41e-07	3.69e-09	6.76e-07	NaN	1.54943	0.659216	1.27318	0.208631	0.00546354	0.972884	1.30867	0.13649	1.52854	0.935877	1.6556	1.08637	0.606807	0.321839	0.016976
EDIN	1	3	23	23	2	132EDIN	011FP2	1.88374	1.88426	1.87076	1.72274	1.86785	6.23e-07	1.03e-06	6.64e-07	1.51e-07	8.16e-09	7.9e-07	NaN	0.789081	1.30118	0.84052	0.19151	0.0103323	0.937812	0.896256	0.148047	1.29358	1.08108	0.729902	0.96236	1.35208	0.411209	0.0251267
EDIN	2	3	23	23	2	232EDIN	012FP2	1.88245	1.87766	1.86989	1.71715	1.85858	6.5e-07	3.28e-07	7.01e-07	1.12e-07	3.5e-09	4.56e-07	NaN	1.42569	0.718646	1.53878	0.244754	0.00768506	0.81933	1.8781	0.130602	1.87404	0.892982	1.59655	1.13319	0.634178	0.43295	0.0177505
EDIN	8	8C 13WT10	90	100	1	13WT1081EDIN	010FP3	1.88543	1.88372	1.85925	1.72716	1.86435	2.58e-07	5.89e-07	4.5e-09	1.02e-09	4.51e-07	2.83e-07	NaN	0.913114	2.08411	0.0159306	0.00359973	1.59574	1.19145	0.0133708	0.168392	0.0213771	0.997579	0.91533	1.08388	1.92282	0.54746	2.91481
EDIN	8	8C 13WT10	90	100	2	13WT1082EDIN	011FP3	1.88881	1.88016	1.85109	1.72167	1.88629	2.68e-06	4.47e-06	3.7e-08	2.38e-09	7.68e-07	3.45e-06	NaN	0.776551	1.29622	0.0107251	0.000690963	0.222924	1.26525	0.00847663	0.146125	0.00472856	1.02585	0.756982	1.00505	1.28971	0.359094	0.620796
EDIN	8	8C 13WT10	90	100	3	13WT1083EDIN	012FP3	1.8895	1.90192	1.85731	NaN	1.89094	1.54e-06	1.1e-06	2.49e-08	NaN	4.45e-07	1.29e-06	Missing values	1.1893	0.852555	0.0192348	NaN	0.343907	1.17866	0.0163191	0.176063	NaN	1.0656	1.11609	0.963561	0.884796	0.358734	0.958669
EDIN	8	8C 8WT10	55	65	3	8WT1083EDIN	009FP3	1.87988	1.88296	1.87016	1.71813	1.87523	5.51e-07	6.23e-07	1.48e-07	2.45e-08	3.92e-07	5.81e-07	NaN	0.948297	1.0713	0.254562	0.0421358	0.674737	0.972884	0.261657	0.13649	0.30871	0.935877	1.01327	1.08637	0.986132	0.321839	2.09651
FCA	1	1	9	9	1	111FCA	006FP3	1.87135	1.88785	1.86674	1.72318	1.88094	2.57e-09	1.35e-08	3.76e-09	2.62e-09	3.32e-10	5.88e-09	Bad UBC	0.437648	2.3033	0.639013	0.445257	0.0564356	2.43184	0.26277	0.367617	1.2112	3.40765	0.128431	1.5644	1.47232	1.03782	0.0543787
FCA	1	1	9	9	2	112FCA	009FP1	1.868	1.8849	1.87638	1.74067	1.84771	1.2e-07	1.52e-07	2.04e-07	2.31e-08	2.1e-09	1.34e-07	NaN	0.897738	1.13088	1.51798	0.172136	0.0156597	0.841732	1.8034	0.0920425	1.87018	1.08201	0.829691	0.963693	1.17349	0.507846	0.0308356
FCA	2	1	9	9	2	212FCA	010FP1	1.8647	1.8809	1.87955	1.72822	1.85484	1.75e-08	1.51e-08	2.26e-08	6.38e-09	3.76e-10	1.62e-08	Bad UBC	1.08294	0.931551	1.39739	0.394037	0.0232302	0.714524	1.95569	0.110966	3.55096	1.045	1.0363	1.0011	0.930525	0.484065	0.0479898
FCA	3	1	9	9	2	312FCA	011FP1	1.875	1.88906	1.8814	1.72278	1.84935	1.07e-07	2.76e-07	2.84e-07	5.38e-08	1.13e-09	1.71e-07	NaN	0.62329	1.61129	1.65952	0.314015	0.00660825	0.780389	2.12653	0.143972	2.18108	1.28092	0.486597	0.830475	1.9402	0.596948	0.0110701
FCA	1	2	16	16	1	121FCA	001FP1	1.86774	1.90213	1.87451	1.71119	1.84445	1.04e-07	8.78e-08	2.75e-07	2.98e-08	9.92e-10	9.51e-08	NaN	1.09663	0.923503	2.88736	0.313804	0.0104244	0.880708	3.27845	0.192921	1.62659	1.13909	0.962732	0.889496	1.03823	0.67031	0.0155517
FCA	2	2	16	16	1	221FCA	001FP1	1.86774	1.90213	1.87451	1.71119	1.84445	4.49e-08	4.04e-08	1.45e-07	1.21e-08	1.67e-10	4.26e-08	NaN	1.05504	0.948473	3.40209	0.28309	0.00391306	0.880708	3.8629	0.192921	1.46739	1.13909	0.926218	0.889496	1.0663	0.67031	0.0058377
FCA	3	2	16	16	1	321FCA	001FP3	1.88776	1.90249	1.88946	1.76783	1.87991	2.1e-07	1.09e-07	2.58e-07	2.44e-08	4.11e-10	1.49e-07	NaN	1.41387	0.73344	1.7371	0.164063	0.00276784	0.906749	1.91574	0.0776456	2.11297	1.09732	1.28848	0.95644	0.766844	0.455825	0.00607216
FCA	2	2	16	16	2	222FCA	009FP2	1.86867	1.88053	1.87899	1.73996	1.85198	4.37e-07	1.7e-07	3.18e-07	6.2e-08	2.07e-09	2.71e-07	NaN	1.61143	0.625932	1.17086	0.228506	0.00762255	0.70459	1.66176	0.0982326	2.32618	1.01537	1.58703	1.02179	0.612584	0.432925	0.0176071
FCA	3	2	16	16	2	322FCA	010FP1	1.8647	1.8809	1.87955	1.72822	1.85484	8.26e-07	4.31e-07	9.44e-07	1.37e-07	2.39e-09	5.95e-07	NaN	1.3892	0.724621	1.58662	0.230853	0.00402229	0.714524	2.22052	0.110966	2.08039	1.045	1.32937	1.0011	0.723823	0.484065	0.00830939
FCA	1	2	16	16	2	122FCA	012FP1	1.88099	1.89659	1.87632	1.72076	1.85176	6.99e-07	1.9e-07	5.43e-07	1.75e-07	2.38e-09	3.6e-07	NaN	1.942	0.527354	1.50986	0.485207	0.00661136	0.784247	1.92524	0.146598	3.30978	1.05045	1.84873	0.966884	0.545416	0.531422	0.0124409
FCA	1	5	37	37	1	151FCA	002FP2	1.87118	1.89254	1.89011	1.72422	1.87263	4e-07	3.25e-07	2.3e-07	5.32e-08	3.49e-08	3.54e-07	NaN	1.13037	0.919865	0.650939	0.150297	0.098635	0.715707	0.909505	0.162288	0.926112	1.26694	0.892209	0.833998	1.10296	0.456103	0.216256
FCA	3	5	37	37	1	251FCA	002FP3	1.88057	1.90335	1.89829	1.7732	1.88871	2.07e-07	2.26e-07	2.07e-07	9.05e-09	9.11e-09	2.11e-07	NaN	0.978444	1.07002	0.982299	0.0428597	0.0431436	0.69207	1.41936	0.0619552	0.691786	1.04029	0.940549	0.981386	1.09031	0.33273	0.129666
FCA	1	5	37	37	2	152FCA	010FP3	1.88543	1.88372	1.85925	1.72716	1.86435	1.36e-06	5.1e-07	1.31e-06	2.26e-07	3.64e-08	8.3e-07	NaN	1.64437	0.61409	1.57541	0.271963	0.0439074	1.19145	1.32226	0.168392	1.61506	0.997579	1.64836	1.08388	0.566567	0.54746	0.0802021
FCA	3	5	37	37	2	252FCA	011FP2	1.88374	1.88426	1.87076	1.72274	1.86785	5.53e-07	1.23e-06	1.16e-06	1.15e-07	3.52e-08	8.14e-07	NaN	0.678881	1.50936	1.4204	0.140897	0.043282	0.937812	1.51458	0.148047	0.951705	1.08108	0.627967	0.96236	1.56839	0.411209	0.105255
FCA	2	5	37	37	2	352FCA	012FP3	1.8895	1.90192	1.85731	1.72452	1.89094	8.28e-07	4.66e-07	1.27e-06	9.52e-08	2.07e-08	6.19e-07	NaN	1.33675	0.752212	2.0454	0.153697	0.0333634	1.17866	1.73536	0.176063	0.872966	1.0656	1.25446	0.963561	0.780658	0.358734	0.0930033
FCA	1	7	51	51	1	B2	003 007 FP1	1.87329	1.89506	1.87916	1.73378	1.87786	1.52e-06	1.24e-06	5.42e-07	9.65e-08	2.96e-07	1.37e-06	NaN	1.1086	0.902041	0.395875	0.0704544	0.216164	0.982724	0.402835	0.181607	0.38795	1.17757	0.941429	0.849207	1.06222	0.514649	0.420023
FCA	2	7	51	51	1	B4	003 007 FP1	1.87329	1.89506	1.87916	1.73378	1.87786	1.37e-08	4.56e-08	2.96e-08	1.9e-09	3.22e-09	2.5e-08	NaN	0.547567	1.82626	1.1863	0.075959	0.128897	0.982724	1.20715	0.181607	0.41826	1.17757	0.464998	0.849207	2.15055	0.514649	0.250456
FCA	3	7	51	51	1	D6	003 007 FP2	2.123	2.1085	2.249	1.432	2.421	3.58e-08	5.83e-08	3.74e-08	2.72e-09	9.35e-09	4.57e-08	NaN	0.783194	1.27682	0.817927	0.0595902	0.204843	0.892497	0.916448	0.051175	1.16444	1.01475	0.771813	0.985468	1.29565	0.362457	0.565153
FCA	3	7	51	51	2	372FCA	016FP7	1.89644	1.88728	1.89109	1.70604	1.89299	6.27e-07	7.86e-07	3.77e-07	1.17e-07	7.16e-08	6.73e-07	NaN	0.930407	1.16753	0.560219	0.173072	0.106287	0.661754	0.846568	0.145177	1.19214	0.87103	1.06817	1.21042	0.964568	0.287181	0.370103
FCA	1	7	51	51	2	172FCA	019FP7	1.88187	1.90044	1.90038	1.72628	1.91807	1.19e-06	6.14e-07	5.53e-07	4.08e-08	7.07e-08	8.49e-07	NaN	1.40706	0.723924	0.651356	0.0481294	0.0832909	0.825716	0.788838	0.149663	0.321586	1.12108	1.25509	0.894724	0.809103	0.286746	0.290469
FCA	2	7	51	51	2	272FCA	020FP7	1.88258	1.90751	1.90077	1.72032	1.92048	8.75e-07	6.21e-07	3.58e-07	1.75e-08	2.74e-08	7.31e-07	NaN	1.19723	0.849636	0.48927	0.0239445	0.0374978	0.865621	0.565224	0.176728	0.135488	1.16944	1.02376	0.858029	0.990219	0.291904	0.128459
FCA	1	9	65	65	1	191FCA	004FP1	1.86813	1.89054	1.87135	1.70021	1.87385	9.69e-07	9.53e-07	2.98e-07	3.67e-08	6.68e-07	9.32e-07	NaN	1.03913	1.02248	0.320006	0.0393199	0.716766	0.876494	0.365098	0.227034	0.173189	1.11778	0.929638	0.921858	1.10915	0.389836	1.83864
FCA	2	9	65	65	1	291FCA	004FP1	1.86813	1.89054	1.87135	1.70021	1.87385	1.51e-07	2.99e-07	9.3e-08	5.91e-09	1.55e-07	2.06e-07	NaN	0.735403	1.452	0.452344	0.028719	0.754999	0.876494	0.516083	0.227034	0.126496	1.11778	0.657916	0.921858	1.57508	0.389836	1.93671
FCA	3	9	65	65	1	391FCA	004FP2	1.87305	1.89591	1.87559	1.74662	1.87864	1.05e-06	1.11e-06	6.22e-07	2.04e-08	6.85e-07	1.05e-06	NaN	1.00305	1.05593	0.594344	0.019528	0.653897	1.28987	0.460776	0.0723901	0.269761	1.02024	0.983149	0.833748	1.26649	0.240781	2.71573
FCA	1	9	65	65	2	192FCA	013FP2	1.89904	1.90271	1.9034	1.70761	1.889	8.59e-07	1e-06	2.53e-07	8.6e-08	7.46e-07	9.27e-07	NaN	0.925997	1.08192	0.272863	0.0927708	0.80441	0.764524	0.356906	0.233327	0.397599	0.946251	0.978595	1.13119	0.956439	0.356246	2.25802
FCA	3	9	65	65	2	392FCA	014FP1	1.89092	1.8987	1.87583	1.68581	1.89428	3.66e-07	6.16e-07	3.28e-07	4.96e-08	2.63e-07	4.71e-07	NaN	0.776712	1.30696	0.697277	0.105372	0.558659	1.19098	0.585467	0.405493	0.259861	1.29674	0.598971	0.844208	1.54814	0.417674	1.33755
FCA	2	9	65	65	2	292FCA	015FP1	1.88579	1.88749	1.87612	1.70145	1.88913	2.63e-06	3.52e-06	1.15e-06	9.92e-08	1.44e-06	2.99e-06	NaN	0.877154	1.17432	0.384846	0.0331348	0.480864	1.15935	0.331949	0.301099	0.110046	1.24228	0.706085	0.860931	1.36402	0.463419	1.03764
FCA	2	11	79	79	1	C12	003 007 FP3	1.5135	1.2735	1.3425	1.452	1.524	NaN	6.21e-07	6.21e-08	5.21e-09	3.09e-07	NaN	Bad UBC	NaN	NaN	NaN	NaN	NaN	1.12769	NaN	0.261795	NaN	1.31456	NaN	0.76071	NaN	0.481903	NaN
FCA	1	11	79	79	1	1111FCA	006FP3	1.87135	1.88785	1.86674	1.72318	1.88094	1.53e-06	1.04e-06	1.33e-07	1.51e-08	5.99e-07	1.21e-06	NaN	1.26524	0.855945	0.110063	0.0124306	0.495081	2.43184	0.0452594	0.367617	0.033814	3.40765	0.371294	1.5644	0.54714	1.03782	0.477037
FCA	3	11	79	79	1	F3	007 008 FP4	1.766	2.023	2.023	1.205	2.5	7.16e-08	1.34e-07	1.04e-08	8.45e-10	7.72e-08	9.78e-08	NaN	0.731853	1.36639	0.105862	0.00864311	0.789703	0.915093	0.115685	0.0815395	0.105999	0.901006	0.812262	1.10987	1.23113	0.46306	1.7054
FCA	3	11	79	79	2	3112FCA	014FP4	1.87992	1.91971	1.87856	1.70837	1.88699	1.3e-06	4.02e-07	8.49e-08	6.67e-09	4.82e-07	7.07e-07	NaN	1.83423	0.569205	0.120084	0.00943126	0.681481	1.09719	0.109447	0.241073	0.039122	1.21167	1.51381	0.869193	0.654867	0.360863	1.88848
FCA	2	11	79	79	2	2112FCA	015FP3	1.89281	1.89762	1.89592	1.71722	1.92113	9.28e-07	1.8e-06	1.14e-07	3.53e-09	2.27e-07	1.27e-06	NaN	0.729739	1.4181	0.0898147	0.00277625	0.178198	0.898213	0.0999926	0.195903	0.0141716	1.17831	0.619308	0.874314	1.62195	0.28899	0.616621
FCA	3	14	114	114	2	3142FCA	015FP3	1.89281	1.89762	1.89592	NaN	1.92113	1.35e-06	1.16e-06	8.93e-09	NaN	9.8e-07	1.23e-06	Missing values	1.09824	0.941215	0.00724012	NaN	0.794632	0.898213	0.00806058	0.195903	NaN	1.17831	0.932046	0.874314	1.07652	0.28899	2.74968
FCA	1	14	114	114	1	1141FCA	016FP6	1.8662	1.90549	1.89735	1.72908	1.88794	1.92e-06	1.75e-06	5.63e-09	4.96e-10	1.14e-06	1.75e-06	NaN	1.09687	0.997585	0.00320778	0.000282357	0.64978	0.773496	0.00414712	0.122447	0.00230595	1.33059	0.824353	0.748278	1.33317	0.401535	1.61824
FCA	2	14	114	114	1	2141FCA	017FP1	1.87546	1.88935	1.87213	NaN	1.8794	2.87e-07	3.94e-07	3.15e-09	NaN	3.17e-07	3.28e-07	Missing values	0.876609	1.20293	0.00962477	NaN	0.966616	1.0257	0.00938364	0.246117	NaN	1.18187	0.741712	0.843762	1.42567	0.443765	2.17822
FCA	3	14	114	114	1	3141FCA	018FP1	1.87818	1.88808	1.8758	1.73444	1.88665	4.39e-07	4.69e-07	5.3e-09	4.82e-10	8e-07	4.52e-07	NaN	0.97167	1.0388	0.011725	0.00106762	1.77066	0.884537	0.0132556	0.115537	0.00924046	1.0584	0.918052	0.897426	1.15753	0.344665	5.13734
FCA	1	14	114	114	2	1142FCA	019FP3	1.89621	1.89562	1.88374	1.70489	1.9038	8.25e-07	8.28e-07	3.28e-09	3.15e-08	7.02e-07	8.23e-07	NaN	1.00338	1.00683	0.00398944	0.0383156	0.853303	1.05274	0.00378959	0.249768	0.153405	1.07757	0.931144	0.937987	1.07339	0.358514	2.38011
FCA	2	14	114	114	2	2142FCA	020FP2	1.90785	1.89962	1.88201	1.68971	1.90013	1.76e-07	2.17e-07	3.71e-09	8.64e-10	1.26e-07	1.92e-07	NaN	0.913838	1.13129	0.0192959	0.00450042	0.657881	1.25034	0.0154326	0.3489	0.0128989	0.987811	0.925114	1.02211	1.10683	0.418299	1.57275
FCA	2	15	128	128	1	2151FCA	014FP1	1.89092	1.8987	1.87583	1.68581	1.89428	8.66e-07	6.46e-07	1.77e-09	2.28e-09	4.13e-07	7.26e-07	NaN	1.19338	0.890319	0.00244284	0.00314348	0.568894	1.19098	0.00205112	0.405493	0.00775224	1.29674	0.920289	0.844208	1.05462	0.417674	1.36205
FCA	3	15	128	128	1	3151FCA	015FP1	1.88579	1.88749	1.87612	NaN	1.88913	1.35e-06	9.41e-07	8.95e-10	NaN	5.94e-07	1.1e-06	Missing values	1.22519	0.856826	0.000815163	NaN	0.541185	1.15935	0.000703118	0.301099	NaN	1.24228	0.986244	0.860931	0.995233	0.463419	1.16781
FCA	2	15	128	128	2	2152FCA	017FP3	1.87941	1.89809	1.85559	NaN	1.89286	3.01e-07	3.29e-07	8.49e-10	NaN	2.21e-07	3.1e-07	Missing values	0.971359	1.05925	0.00273708	NaN	0.711637	1.42603	0.00191937	0.239244	NaN	1.16481	0.833923	0.874626	1.21109	0.398456	1.78599
FCA	3	15	128	128	2	3152FCA	018FP2	1.88126	1.88502	1.87016	NaN	1.89438	2.96e-07	2.01e-07	5.33e-10	NaN	2.25e-07	2.4e-07	Missing values	1.23469	0.839185	0.00222082	NaN	0.939891	1.1424	0.00194399	0.29813	NaN	1.16813	1.05699	0.866349	0.968645	0.404033	2.32627
FCA	1	15	128	128	2	1152FCA	020FP3	1.8778	1.90697	1.86206	1.71413	1.91182	1.47e-06	1.07e-06	1.06e-09	1.25e-09	6.31e-07	1.2e-06	NaN	1.22769	0.888584	0.000885735	0.00103822	0.525405	1.48009	0.000598434	0.190239	0.00545747	1.2726	0.964715	0.79661	1.11546	0.297273	1.76742
FCA	1	13	100	100	1	1131FCA	004FP3	1.87999	1.89718	1.86015	1.72219	1.88538	1.42e-06	1.76e-06	3.63e-08	1.87e-09	9.84e-07	1.54e-06	NaN	0.922462	1.14812	0.023677	0.00122112	0.641141	1.28987	0.018356	0.179254	0.00681225	1.25463	0.735249	0.833748	1.37706	0.413129	1.55192
FCA	2	13	100	100	1	2131FCA	005FP1	1.87074	1.88866	1.86393	1.73025	1.87136	9.07e-07	1.5e-06	8.8e-08	3.99e-09	1.25e-06	1.16e-06	NaN	0.784555	1.29883	0.0761688	0.00345069	1.08023	0.87872	0.0866815	0.123899	0.0278509	0.989991	0.792487	1.01214	1.28325	0.335857	3.21634
FCA	3	13	100	100	1	3131FCA	005FP1	1.87074	1.88866	1.86393	1.73025	1.87136	1.3e-07	2.65e-07	8.42e-09	7.51e-10	1.57e-07	1.82e-07	NaN	0.715757	1.45659	0.0462021	0.00412321	0.863982	0.87872	0.0525789	0.123899	0.0332789	0.989991	0.722993	1.01214	1.43911	0.335857	2.57247
FCA	2	13	100	100	2	2132FCA	017FP3	1.87941	1.89809	1.85559	1.70262	1.89286	1.39e-07	1.21e-07	8.11e-09	7.62e-10	1e-07	1.27e-07	NaN	1.09757	0.956556	0.0639785	0.00600913	0.789901	1.42603	0.0448649	0.239244	0.0251172	1.16481	0.942274	0.874626	1.09367	0.398456	1.9824
FCA	3	13	100	100	2	3132FCA	018FP1	1.87818	1.88808	1.8758	1.73444	1.88665	7.21e-07	6.02e-07	3.98e-08	1.06e-09	8.65e-07	6.57e-07	NaN	1.0978	0.916988	0.0606338	0.00160837	1.31671	0.884537	0.0685487	0.115537	0.0139209	1.0584	1.03722	0.897426	1.0218	0.344665	3.82026
FCA	1	13	100	100	2	1132FCA	019FP3	1.89621	1.89562	1.88374	1.70489	1.9038	3.08e-07	2.54e-07	6.54e-09	1.21e-08	2.6e-07	2.75e-07	NaN	1.11681	0.922109	0.0237589	0.0437905	0.942623	1.05274	0.0225687	0.249768	0.175325	1.07757	1.03641	0.937987	0.983072	0.358514	2.62925
FCA	1	17	156	156	1	1171 FCA	T17 FP1	1.87875	1.87217	1.86863	1.69041	1.87207	3.82e-07	4.5e-07	1.09e-09	1.2e-09	1.93e-07	4.15e-07	NaN	0.921643	1.08502	0.00263006	0.00288595	0.464039	1.15354	0.00228	0.232756	0.0123991	1.0991	0.838544	0.909836	1.19254	0.455106	1.01963
FCA	2	17	156	156	1	2171 FCA	T17 FP2	1.86756	1.86273	1.86623	1.68869	1.87493	3.99e-08	3.25e-08	4.69e-10	2.03e-09	2.45e-08	3.6e-08	NaN	1.1085	0.902124	0.0130134	0.0563927	0.680207	1.06957	0.0121669	0.222511	0.253438	1.08395	1.02264	0.922548	0.97786	0.377291	1.80287
FCA	3	17	156	156	1	3171 FCA	T17 FP3	1.87141	1.85894	1.87842	1.70743	1.8995	1.92e-06	1.34e-06	7.09e-10	5.78e-10	3.99e-07	1.6e-06	NaN	1.19468	0.837045	0.000442119	0.00036017	0.248665	0.995003	0.000444339	0.154747	0.00232747	1.11643	1.07009	0.895712	0.934502	0.26627	0.933882
FCA	1	17	156	156	2	1172 FCA	T17 FP3	1.87141	1.85894	1.87842	1.70743	1.8995	1.42e-06	8.68e-07	3.18e-10	3.84e-09	2.02e-07	1.11e-06	NaN	1.27726	0.782927	0.000286742	0.00346007	0.182294	0.995003	0.000288182	0.154747	0.0223595	1.11643	1.14406	0.895712	0.874083	0.26627	0.684622
FCA	2	17	156	156	2	2172 FCA	T17 FP4	1.88299	1.87427	1.85002	1.70246	1.88145	6.08e-07	1.25e-07	4.99e-11	NaN	2.21e-07	2.75e-07	NaN	2.2081	0.452877	0.000181341	NaN	0.801163	1.50587	0.000120423	0.211762	NaN	1.01314	2.17947	0.987035	0.458826	0.357668	2.23996
FCA	3	17	156	156	2	3172 FCA	T17 FP5	1.8793	1.89836	1.8706	1.69511	1.88532	1.82e-06	7.61e-07	2.79e-10	NaN	2.62e-07	1.18e-06	NaN	1.54493	0.64728	0.000237359	NaN	0.222923	0.856659	0.000277075	0.208815	NaN	1.02319	1.50992	0.977339	0.662288	0.261137	0.853664
FCA	22	22C 13WT10	110	100	2	E7	003 007 FP2	2.123	2.1085	2.249	1.432	2.421	NaN	1.08e-07	2.68e-09	3.1e-10	2.32e-09	NaN	NaN	NaN	NaN	NaN	NaN	NaN	0.892497	NaN	0.051175	NaN	1.01475	NaN	0.985468	NaN	0.362457	NaN
FCA	22	22C 13WT10	110	100	1	13WT10221FCA	006FP2	1.88265	1.89284	1.87491	1.75695	1.87568	1.5e-06	1.66e-06	5.65e-09	4.01e-10	2.38e-08	1.57e-06	NaN	0.95773	1.05677	0.00360275	0.000255242	0.0151575	0.865121	0.00416444	0.0688171	0.00370899	1.00911	0.949087	0.999189	1.05762	0.389581	0.0389072
FCA	22	22C 13WT10	110	100	3	G2	007 008 FP4	1.766	2.023	2.023	1.205	2.5	2.22e-08	2.39e-08	2.57e-10	NaN	1.49e-09	2.3e-08	Bad UBC	0.965328	1.03592	0.0111823	NaN	0.0645198	0.915093	0.0122198	0.0815395	NaN	0.901006	1.07139	1.10987	0.933368	0.46306	0.139334
FCA	22	22C 8WT10	75	65	1	8WT10221FCA	005FP3	1.86287	1.89244	1.86343	1.73985	1.84872	8.62e-07	7.87e-07	1.48e-07	2.07e-08	2.25e-08	8.04e-07	NaN	1.07244	0.979407	0.18378	0.0258049	0.0279526	0.90024	0.204146	0.110318	0.233913	1.19392	0.898256	0.864443	1.13299	0.476702	0.0586374
FCA	22	22C 8WT10	75	65	2	8WT10222FCA	005FP3	1.86287	1.89244	1.86343	1.73985	1.84872	5.76e-08	5.81e-08	1.54e-08	1.37e-09	1.42e-09	5.77e-08	NaN	0.997465	1.00629	0.267575	0.0237457	0.0246157	0.90024	0.297226	0.110318	0.215247	1.19392	0.835455	0.864443	1.16409	0.476702	0.0516375
FCA	22	22C 8WT10	75	65	3	8WT10223FCA	006FP1	1.87535	1.8943	1.86145	1.71724	1.85957	4.02e-08	3.95e-08	1.2e-08	6.78e-10	1.27e-09	3.94e-08	NaN	1.01861	1.0018	0.304763	0.0172057	0.0321245	1.07759	0.28282	0.164461	0.104619	1.2976	0.785001	0.810554	1.23595	0.573216	0.0560425
FCA	1	3	23	23	1	131FCA	001FP3	1.88776	1.90249	1.88946	1.76783	1.87991	8.3e-07	5.3e-07	1.14e-06	8.25e-08	1.11e-08	6.45e-07	NaN	1.28737	0.822553	1.77255	0.128027	0.0171795	0.906749	1.95484	0.0776456	1.64886	1.09732	1.1732	0.95644	0.860015	0.455825	0.0376887
FCA	2	3	23	23	1	231FCA	002FP1	1.87608	1.89537	1.88205	1.72199	1.8543	1.22e-07	2.35e-07	2.7e-07	4.26e-08	1.68e-09	1.69e-07	NaN	0.722597	1.39001	1.59789	0.252387	0.00995634	0.75207	2.12465	0.1661	1.51949	1.07309	0.673381	0.946048	1.46928	0.564559	0.0176356
FCA	3	3	23	23	1	331FCA	002FP2	1.87118	1.89254	1.89011	1.72422	1.87263	5.63e-07	1.69e-07	1.79e-07	3.04e-08	1.51e-09	2.99e-07	NaN	1.88009	0.563923	0.5965	0.101544	0.0050485	0.715707	0.833441	0.162288	0.625699	1.26694	1.48397	0.833998	0.676168	0.456103	0.0110688
FCA	3	3	23	23	2	332FCA	009FP2	1.86867	1.88053	1.87899	1.73996	1.85198	9.53e-07	8.53e-07	1.01e-06	1.43e-07	7.48e-09	8.89e-07	NaN	1.07189	0.960216	1.13625	0.161294	0.00841339	0.70459	1.61264	0.0982326	1.64196	1.01537	1.05566	1.02179	0.939739	0.432925	0.0194338
FCA	1	3	23	23	2	132FCA	011FP1	1.875	1.88906	1.8814	1.72278	1.84935	3.88e-07	9.07e-07	7.34e-07	5.68e-08	5.86e-09	5.89e-07	NaN	0.657874	1.54024	1.24541	0.0963304	0.009944	0.780389	1.59589	0.143972	0.669089	1.28092	0.513596	0.830475	1.85464	0.596948	0.0166581
FCA	2	3	23	23	2	232FCA	012FP2	1.88245	1.87766	1.86989	1.71715	1.85858	4.42e-07	3.28e-07	6.62e-07	7.03e-08	3.72e-09	3.74e-07	NaN	1.18124	0.875672	1.76947	0.187978	0.00993706	0.81933	2.15966	0.130602	1.43932	0.892982	1.32281	1.13319	0.772747	0.43295	0.022952
FCA	8	8C 13WT10	90	100	1	13WT1081FCA	010FP3	1.88543	1.88372	1.85925	1.72716	1.86435	1.45e-06	9.49e-07	1.01e-08	1.02e-09	4.46e-07	1.17e-06	NaN	1.24027	0.811517	0.00862385	0.000875766	0.380968	1.19145	0.00723813	0.168392	0.00520076	0.997579	1.24328	1.08388	0.748715	0.54746	0.695884
FCA	8	8C 13WT10	90	100	2	13WT1082FCA	011FP3	1.88881	1.88016	1.85109	1.72167	1.88629	5.38e-07	1.27e-06	9.17e-09	1.73e-09	2.17e-07	8.2e-07	NaN	0.655582	1.54588	0.011177	0.00211075	0.264703	1.26525	0.00883381	0.146125	0.0144448	1.02585	0.639061	1.00505	1.53811	0.359094	0.737141
FCA	8	8C 13WT10	90	100	3	13WT1083FCA	012FP3	1.8895	1.90192	1.85731	1.72452	1.89094	1.41e-06	1.42e-06	5.58e-08	4.66e-09	1.39e-06	1.4e-06	NaN	1.01259	1.01399	0.0399754	0.00333914	0.998019	1.17866	0.0339159	0.176063	0.0189657	1.0656	0.950257	0.963561	1.05234	0.358734	2.78206
FCA	8	8C 8WT10	55	65	1	G10	003 007 FP3	1.5135	1.2735	1.3425	1.452	1.524	7.8e-07	5.27e-07	9.91e-08	7.09e-09	3.31e-07	6.41e-07	NaN	1.21654	0.822004	0.154612	0.0110671	0.516248	1.12769	0.137106	0.261795	0.0422737	1.31456	0.925434	0.76071	1.08057	0.481903	1.07127
FCA	8	8C 8WT10	55	65	3	8WT1083FCA	009FP3	1.87988	1.88296	1.87016	1.71813	1.87523	8.34e-07	8.57e-07	7.6e-08	2.86e-08	6.15e-07	8.39e-07	NaN	0.993852	1.02144	0.0905474	0.034066	0.733175	0.972884	0.0930711	0.13649	0.249586	0.935877	1.06195	1.08637	0.940228	0.321839	2.27808
FLD	1	1	9	9	1	111FLD	006FP2	NaN	1.89284	1.87491	1.75695	1.87568	NaN	1.96e-08	4.31e-09	2.03e-09	4.74e-10	1.93e-08	Bad UBC	NaN	1.01454	0.22279	0.104993	0.0245253	0.865121	0.257525	0.0688171	1.52568	1.00911	NaN	0.999189	1.01536	0.389581	0.062953
FLD	1	1	9	9	2	112FLD	009FP1	1.868	1.8849	1.87638	1.74067	1.84771	1.96e-07	7.59e-08	9.12e-08	1.83e-08	1.72e-09	1.2e-07	NaN	1.62965	0.632015	0.75972	0.152643	0.0142953	0.841732	0.902568	0.0920425	1.6584	1.08201	1.50613	0.963693	0.655826	0.507846	0.0281489
FLD	2	1	9	9	2	212FLD	010FP1	1.8647	1.8809	1.87955	1.72822	1.85484	1.51e-08	8.43e-09	1.23e-08	3.23e-09	1.36e-10	1.12e-08	Bad UBC	1.34637	0.751247	1.0958	0.287839	0.0120866	0.714524	1.53362	0.110966	2.59394	1.045	1.28839	1.0011	0.750419	0.484065	0.0249689
FLD	3	1	9	9	2	312FLD	011FP1	1.875	1.88906	1.8814	1.72278	1.84935	2.21e-08	3.84e-08	3.59e-08	3.78e-09	2.37e-10	2.82e-08	NaN	0.781105	1.36081	1.2698	0.133715	0.00839578	0.780389	1.62713	0.143972	0.928756	1.28092	0.609801	0.830475	1.63859	0.596948	0.0140645
FLD	1	2	16	16	1	121FLD	001FP1	1.86774	1.90213	1.87451	1.71119	1.84445	3.98e-07	2.09e-07	4e-07	6.71e-08	2.86e-09	2.88e-07	NaN	1.38131	0.726006	1.38696	0.232556	0.00989855	0.880708	1.57482	0.192921	1.20545	1.13909	1.21265	0.889496	0.816198	0.67031	0.0147671
FLD	2	2	16	16	1	221FLD	001FP2	1.86641	1.8869	1.86963	1.74128	1.85735	7.24e-07	7.92e-07	8.83e-07	6.2e-08	1.77e-09	7.57e-07	NaN	0.95676	1.04672	1.16602	0.0819194	0.00233376	0.82159	1.41922	0.0913827	0.896443	1.17879	0.811649	0.907243	1.15373	0.492102	0.00474243
FLD	3	2	16	16	1	321FLD	001FP2	1.86641	1.8869	1.86963	1.74128	1.85735	2.33e-07	4.45e-07	2.68e-07	4.13e-08	2.54e-09	3.22e-07	NaN	0.723	1.38364	0.833368	0.128299	0.00789506	0.82159	1.01434	0.0913827	1.40398	1.17879	0.613343	0.907243	1.52511	0.492102	0.0160435
FLD	2	2	16	16	2	222FLD	009FP2	1.86867	1.88053	1.87899	1.73996	1.85198	3.7e-09	1.8e-09	3.48e-09	5.28e-10	1.22e-09	2.53e-09	Bad UBC, order of magnitude (VIN3)	1.45949	0.708785	1.37326	0.208352	0.480475	NaN	NaN	NaN	NaN	NaN	NaN	NaN	NaN	NaN	NaN
FLD	3	2	16	16	2	322FLD	010FP2	1.87255	1.89381	1.86992	1.73219	1.84777	4.56e-07	1.81e-07	3.28e-07	7.67e-08	2.13e-09	2.86e-07	NaN	1.59579	0.632246	1.14686	0.268363	0.00744414	1.44712	0.792516	0.202229	1.32703	1.71879	0.928439	0.645878	0.978893	0.919584	0.00809511
FLD	1	2	16	16	2	122FLD	012FP1	1.88099	1.89659	1.87632	1.72076	1.85176	9.61e-08	2.8e-08	5.31e-08	1.33e-08	2.16e-10	4.99e-08	NaN	1.92619	0.561433	1.06329	0.265723	0.00433522	0.784247	1.35581	0.146598	1.81259	1.05045	1.83367	0.966884	0.580663	0.531422	0.00815778
FLD	1	5	37	37	1	151FLD	002FP2	1.87118	1.89254	1.89011	1.72422	1.87263	2.28e-07	1.69e-07	7.91e-08	1.69e-08	2.25e-08	1.94e-07	NaN	1.17634	0.871142	0.408519	0.0874216	0.116023	0.715707	0.570791	0.162288	0.538681	1.26694	0.928489	0.833998	1.04454	0.456103	0.254379
FLD	3	5	37	37	1	251FLD	002FP3	1.88057	1.90335	1.89829	1.7732	1.88871	4.21e-07	5.6e-07	3.59e-07	3.12e-08	2.12e-08	4.78e-07	NaN	0.881501	1.17293	0.751045	0.0652729	0.0444239	0.69207	1.08521	0.0619552	1.05355	1.04029	0.847361	0.981386	1.19518	0.33273	0.133513
FLD	1	5	37	37	2	152FLD	010FP2	1.87255	1.89381	1.86992	1.73219	1.84777	8.18e-07	6.56e-07	4.27e-07	6.25e-08	4.16e-08	7.26e-07	NaN	1.12662	0.903274	0.587474	0.0860756	0.0573352	1.44712	0.405961	0.202229	0.425635	1.71879	0.655474	0.645878	1.39852	0.919584	0.062349
FLD	3	5	37	37	2	252FLD	011FP2	1.88374	1.88426	1.87076	1.72274	1.86785	9.19e-07	1.53e-06	8.02e-07	7.04e-08	5.39e-08	1.18e-06	NaN	0.781393	1.29859	0.682115	0.0598544	0.0458448	0.937812	0.727347	0.148047	0.404293	1.08108	0.722791	0.96236	1.34938	0.411209	0.111488
FLD	2	5	37	37	2	352FLD	012FP2	1.88245	1.87766	1.86989	1.71715	1.85858	4.33e-07	6.69e-07	9.13e-07	6.57e-08	1.21e-08	5.32e-07	NaN	0.813306	1.25771	1.71638	0.123475	0.0226876	0.81933	2.09486	0.130602	0.945428	0.892982	0.910775	1.13319	1.10988	0.43295	0.0524023
FLD	3	7	51	51	2	372FLD	016FP7	1.89644	1.88728	1.89109	1.70604	1.89299	2.74e-07	5.71e-07	1.5e-07	3.28e-08	4.68e-08	3.91e-07	NaN	0.700484	1.45978	0.384893	0.0839832	0.119864	0.661754	0.581625	0.145177	0.578486	0.87103	0.804202	1.21042	1.20601	0.287181	0.417382
FLD	1	7	51	51	2	172FLD	019FP2	1.90057	1.87824	1.87982	1.7141	1.89634	1.03e-06	9.78e-07	4.03e-07	1.19e-07	1.4e-07	9.98e-07	NaN	1.03454	0.979687	0.40347	0.118749	0.140635	1.10612	0.36476	0.188318	0.630577	0.95616	1.08197	1.05573	0.927975	0.363931	0.386432
FLD	2	7	51	51	2	272FLD	020FP2	1.90785	1.89962	1.88201	1.68971	1.90013	2.18e-07	9.97e-08	5.38e-08	8.09e-09	2.3e-08	1.45e-07	NaN	1.50119	0.687585	0.37131	0.0557935	0.158877	1.25034	0.296968	0.3489	0.159913	0.987811	1.51972	1.02211	0.672713	0.418299	0.379816
FLD	1	9	65	65	1	191FLD	004FP1	1.86813	1.89054	1.87135	1.70021	1.87385	3.04e-07	2.68e-07	1.17e-07	6.61e-09	2.13e-07	2.8e-07	NaN	1.08548	0.954243	0.418503	0.023572	0.761055	0.876494	0.477474	0.227034	0.103826	1.11778	0.971102	0.921858	1.03513	0.389836	1.95225
FLD	2	9	65	65	1	291FLD	004FP2	1.87305	1.89591	1.87559	1.74662	1.87864	1.34e-06	8.27e-07	2.01e-07	2.17e-08	1.09e-06	1.01e-06	NaN	1.31837	0.816102	0.198729	0.021406	1.07227	1.28987	0.154068	0.0723901	0.295704	1.02024	1.29221	0.833748	0.978835	0.240781	4.45331
FLD	3	9	65	65	1	391FLD	004FP2	1.87305	1.89591	1.87559	1.74662	1.87864	1.61e-06	2.02e-06	5.8e-07	2.8e-08	1.36e-06	1.79e-06	NaN	0.899603	1.13149	0.324317	0.0156767	0.75884	1.28987	0.251433	0.0723901	0.216558	1.02024	0.881753	0.833748	1.35712	0.240781	3.15158
FLD	3	9	65	65	2	392FLD	014FP7	1.88408	1.91267	1.90425	1.70712	1.89464	6.09e-07	2.54e-07	1.05e-07	1.54e-08	4.31e-07	3.88e-07	NaN	1.57058	0.656278	0.271213	0.0397106	1.11231	0.861562	0.314792	0.237721	0.167047	1.19512	1.31417	0.839336	0.781901	0.436104	2.55057
FLD	2	9	65	65	2	292FLD	015FP1	1.88579	1.88749	1.87612	1.70145	1.88913	9.38e-07	1.01e-06	3.29e-07	1.98e-08	6.71e-07	9.66e-07	NaN	0.970998	1.04439	0.340804	0.0204879	0.694684	1.15935	0.29396	0.301099	0.0680437	1.24228	0.781628	0.860931	1.2131	0.463419	1.49904
FLD	1	11	79	79	1	1111FLD	006FP3	1.87135	1.88785	1.86674	1.72318	1.88094	2.13e-06	1.23e-06	8.59e-08	1.79e-08	7.64e-07	1.57e-06	NaN	1.35677	0.781783	0.0547893	0.0114148	0.487028	2.43184	0.02253	0.367617	0.0310507	3.40765	0.398155	1.5644	0.499734	1.03782	0.469278
FLD	2	11	79	79	1	H1	007 008 FP4	1.766	2.023	2.023	1.205	2.5	1.63e-06	1.4e-06	9.12e-08	5.07e-09	7.41e-07	1.51e-06	NaN	1.07813	0.927534	0.0602573	0.0033467	0.489294	0.915093	0.0658484	0.0815395	0.0410439	0.901006	1.19658	1.10987	0.835714	0.46306	1.05665
FLD	3	11	79	79	1	H3	007 008 FP4	1.766	2.023	2.023	1.205	2.5	7.49e-08	2.14e-07	1.24e-08	5.58e-10	8.65e-08	1.26e-07	NaN	0.592351	1.68819	0.0978521	0.00441264	0.684003	0.915093	0.106931	0.0815395	0.0541167	0.901006	0.657432	1.10987	1.52107	0.46306	1.47714
FLD	1	11	79	79	2	1112FLD	013FP3	1.88302	NaN	NaN	NaN	NaN	2.14e-10	NaN	NaN	NaN	NaN	2.03e-10	Bad UBC	1.05553	NaN	NaN	NaN	NaN	0.866381	NaN	NaN	NaN	NaN	NaN	NaN	NaN	NaN	NaN
FLD	3	11	79	79	2	3112FLD	014FP4	1.87992	1.91971	1.87856	1.70837	1.88699	1.06e-06	4.78e-07	5.54e-08	5.11e-09	3.57e-07	6.79e-07	NaN	1.55418	0.70368	0.0815589	0.00752266	0.524947	1.09719	0.0743344	0.241073	0.0312049	1.21167	1.28268	0.869193	0.809579	0.360863	1.4547
FLD	2	11	79	79	2	2112FLD	015FP3	1.89281	1.89762	1.89592	1.71722	1.92113	1.2e-06	7.04e-07	6.77e-08	3.01e-09	2.87e-07	9.02e-07	NaN	1.33568	0.780447	0.0750903	0.00333993	0.317691	0.898213	0.0835997	0.195903	0.0170489	1.17831	1.13355	0.874314	0.892638	0.28899	1.09931
FLD	3	14	114	114	2	3142FLD	015FP2	1.90353	1.89417	1.87892	NaN	1.89298	7.79e-07	6.75e-07	4.01e-09	NaN	7.53e-07	7.13e-07	Missing values	1.09287	0.947871	0.00562969	NaN	1.05598	1.04908	0.00536633	0.205684	NaN	1.0516	1.03925	0.968382	0.97882	0.366226	2.8834
FLD	1	14	114	114	1	1141FLD	016FP6	1.8662	1.90549	1.89735	1.72908	1.88794	1.98e-06	1.28e-06	9.59e-10	1.02e-09	1.03e-06	1.57e-06	NaN	1.26041	0.812385	0.000610547	0.000650058	0.655224	0.773496	0.000789335	0.122447	0.00530888	1.33059	0.947258	0.748278	1.08567	0.401535	1.6318
FLD	2	14	114	114	1	2141FLD	017FP1	1.87546	1.88935	1.87213	1.69524	1.8794	3.72e-07	8.04e-07	2.65e-09	5.45e-10	2.51e-07	5.4e-07	NaN	0.689414	1.4886	0.00491003	0.00100955	0.464213	1.0257	0.00478702	0.246117	0.0041019	1.18187	0.583323	0.843762	1.76425	0.443765	1.04608
FLD	3	14	114	114	1	3141FLD	018FP1	1.87818	1.88808	1.8758	1.73444	1.88665	9.95e-07	7.37e-07	4.97e-09	1.72e-09	1.33e-06	8.56e-07	NaN	1.16251	0.86048	0.00580239	0.0020122	1.55927	0.884537	0.00655981	0.115537	0.017416	1.0584	1.09837	0.897426	0.958832	0.344665	4.52402
FLD	1	14	114	114	2	1142FLD	019FP3	1.89621	1.89562	1.88374	1.70489	1.9038	1.11e-06	1.17e-06	4.51e-09	5.39e-08	1.16e-06	1.13e-06	NaN	0.980031	1.03363	0.00399434	0.0477078	1.02651	1.05274	0.00379423	0.249768	0.191009	1.07757	0.909481	0.937987	1.10196	0.358514	2.86325
FLD	2	14	114	114	2	2142FLD	020FP2	1.90785	1.89962	1.88201	1.68971	1.90013	1.431e-06	1.65e-06	6.35e-09	9.96e-09	8.98e-07	1.51e-06	NaN	0.946595	1.09206	0.00419717	0.00658986	0.593997	1.25034	0.00335683	0.3489	0.0188875	0.987811	0.958276	1.02211	1.06844	0.418299	1.42003
FLD	2	15	128	128	1	2151FLD	014FP1	1.89092	1.8987	1.87583	1.68581	1.89428	1.51e-06	1.71e-06	2.4e-09	1.06e-09	1.73e-06	1.6e-06	NaN	0.943527	1.06802	0.0014944	0.000664089	1.07684	1.19098	0.00125477	0.405493	0.00163773	1.29674	0.727613	0.844208	1.26511	0.417674	2.57818
FLD	3	15	128	128	1	3151FLD	015FP1	1.88579	1.88749	1.87612	NaN	1.88913	1.39e-06	6.46e-07	7.02e-10	NaN	1.5e-06	9.32e-07	Missing values	1.49235	0.693441	0.000753632	NaN	1.60558	1.15935	0.000650045	0.301099	NaN	1.24228	1.2013	0.860931	0.805455	0.463419	3.46464
FLD	2	15	128	128	2	2152FLD	017FP3	1.87941	1.89809	1.85559	NaN	1.89286	2.6e-07	2.44e-07	5.72e-10	NaN	2.45e-07	2.48e-07	Missing values	1.0473	0.985442	0.00230705	NaN	0.988675	1.42603	0.00161782	0.239244	NaN	1.16481	0.899123	0.874626	1.1267	0.398456	2.48127
FLD	3	15	128	128	2	3152FLD	018FP2	1.88126	1.88502	1.87016	NaN	1.89438	6.88e-07	5.11e-07	6.55e-10	NaN	6e-07	5.82e-07	Missing values	1.1834	0.878157	0.00112617	NaN	1.03169	1.1424	0.00098579	0.29813	NaN	1.16813	1.01307	0.866349	1.01363	0.404033	2.55348
FLD	1	15	128	128	2	1152FLD	020FP3	1.8778	1.90697	1.86206	1.71413	1.91182	7.5e-07	7.25e-07	7.32e-10	1.05e-09	3.23e-07	7.2e-07	NaN	1.04123	1.00655	0.00101567	0.00146202	0.448562	1.48009	0.000686225	0.190239	0.00768521	1.2726	0.818195	0.79661	1.26354	0.297273	1.50892
FLD	1	13	100	100	1	1131FLD	004FP3	1.87999	1.89718	1.86015	1.72219	1.88538	4.55e-06	7.46e-06	1.83e-07	7.48e-09	6.17e-06	5.78e-06	NaN	0.788037	1.2906	0.0316445	0.001294	1.06691	1.28987	0.024533	0.179254	0.0072188	1.25463	0.628105	0.833748	1.54795	0.413129	2.58252
FLD	2	13	100	100	1	2131FLD	005FP1	1.87074	1.88866	1.86393	1.73025	1.87136	6.96e-07	1.13e-06	3.76e-08	2.01e-09	8.61e-07	8.81e-07	NaN	0.790106	1.28263	0.0427409	0.00228084	0.977161	0.87872	0.0486399	0.123899	0.0184089	0.989991	0.798094	1.01214	1.26724	0.335857	2.90945
FLD	3	13	100	100	1	3131FLD	005FP2	1.87738	1.895	1.87672	1.73259	1.86768	3.75e-07	5.91e-07	2.89e-08	3.25e-09	1.25e-06	4.69e-07	NaN	0.799582	1.26066	0.0617556	0.00693946	2.6732	0.850419	0.0726179	0.142996	0.0485289	1.08724	0.735424	0.937791	1.34429	0.424808	6.29271
FLD	2	13	100	100	2	2132FLD	017FP2	1.88289	1.8966	1.87626	1.68928	1.90023	4.06e-07	5.45e-07	1.06e-08	1.53e-09	3.29e-07	4.63e-07	NaN	0.877628	1.178	0.0228557	0.00331111	0.711979	1.07709	0.02122	0.291836	0.0113458	1.1308	0.776112	0.896035	1.31468	0.346238	2.05633
FLD	3	13	100	100	2	3132FLD	018FP1	1.87818	1.88808	1.8758	1.73444	1.88665	2.01e-06	2.21e-06	2.59e-08	1.3e-08	2.05e-06	2.07e-06	NaN	0.972026	1.06836	0.0125198	0.00625879	0.988433	0.884537	0.014154	0.115537	0.0541713	1.0584	0.918388	0.897426	1.19047	0.344665	2.86781
FLD	1	13	100	100	2	1132FLD	019FP3	1.89621	1.89562	1.88374	1.70489	1.9038	9.87e-07	9.76e-07	1.67e-08	3.57e-08	6.49e-07	9.79e-07	NaN	1.00804	0.99729	0.0170944	0.0364892	0.662897	1.05274	0.016238	0.249768	0.146092	1.07757	0.93547	0.937987	1.06322	0.358514	1.84902
FLD	1	17	156	156	1	1171 FLD	T17 FP1	1.87875	1.87217	1.86863	1.69041	1.87207	4.74e-07	2.12e-07	3.04e-10	NaN	1.54e-07	3.17e-07	NaN	1.49539	0.668722	0.000960689	NaN	0.487398	1.15354	0.000832821	0.232756	NaN	1.0991	1.36056	0.909836	0.734992	0.455106	1.07096
FLD	2	17	156	156	1	2171 FLD	T17 FP2	1.86756	1.86273	1.86623	1.68869	1.87493	3.85e-07	2.66e-07	9.46e-10	5.31e-10	1.51e-07	3.2e-07	NaN	1.20322	0.831107	0.0029566	0.00165819	0.471465	1.06957	0.00276429	0.222511	0.00745217	1.08395	1.11002	0.922548	0.900881	0.377291	1.2496
FLD	3	17	156	156	1	3171 FLD	T17 FP2	1.86756	1.86273	1.86623	1.68869	1.87493	2.94e-08	2.88e-08	5.76e-11	NaN	8.94e-09	2.91e-08	Bad UBC, missing values	1.01125	0.988879	0.0019778	NaN	0.307172	NaN	NaN	NaN	NaN	NaN	NaN	NaN	NaN	NaN	NaN
FLD	1	17	156	156	2	1172 FLD	T17 FP3	1.87141	1.85894	1.87842	1.70743	1.8995	1.02e-06	7.93e-07	3.39e-10	NaN	1.56e-07	9e-07	NaN	1.13383	0.881969	0.000376608	NaN	0.173394	0.995003	0.000378499	0.154747	NaN	1.11643	1.01558	0.895712	0.984657	0.26627	0.651196
FLD	2	17	156	156	2	2172 FLD	T17 FP4	1.88299	1.87427	1.85002	1.70246	1.88145	7.56e-07	5.4e-07	3.95e-10	5.23e-09	2.88e-07	6.39e-07	Bad UBC, order of magnitude (UNF)	1.18277	0.845474	0.000617941	0.00818495	0.449966	NaN	NaN	NaN	NaN	NaN	NaN	NaN	NaN	NaN	NaN
FLD	3	17	156	156	2	3172 FLD	T17 FP5	1.8793	1.89836	1.8706	1.69511	1.88532	5.94e-07	3.08e-07	9.88e-11	6.96e-10	8.27e-08	4.28e-07	NaN	1.38755	0.720695	0.000230884	0.00162647	0.193219	0.856659	0.000269517	0.208815	0.00778905	1.02319	1.35611	0.977339	0.737405	0.261137	0.739915
FLD	22	22C 13WT10	110	100	2	G8	003 007 FP2	2.123	2.1085	2.249	1.432	2.421	4.69e-07	1.06e-06	7.47e-09	2.98e-10	2.11e-08	7.07e-07	NaN	0.663903	1.50624	0.0105656	0.000421603	0.0298597	0.892497	0.0118383	0.051175	0.00823845	1.01475	0.654256	0.985468	1.52845	0.362457	0.0823815
FLD	22	22C 13WT10	110	100	1	13WT10221FLD	006FP1	1.87535	1.8943	1.86145	NaN	1.85957	2.98e-07	4.14e-07	2.47e-09	NaN	8.42e-09	3.39e-07	Missing values	0.878225	1.22184	0.00729858	NaN	0.0248554	1.07759	0.00677306	0.164461	NaN	1.2976	0.67681	0.810554	1.50742	0.573216	0.0433614
FLD	22	22C 13WT10	110	100	3	E2	007 008 FP4	1.766	2.023	2.023	1.205	2.5	2.06e-06	1.43e-06	2.04e-08	1.69e-09	4.74e-08	1.72e-06	NaN	1.20301	0.831251	0.0118904	0.000986435	0.0275936	0.915093	0.0129936	0.0815395	0.0120976	0.901006	1.33518	1.10987	0.748963	0.46306	0.0595898
FLD	22	22C 8WT10	75	65	1	8WT10221FLD	005FP3	1.86287	1.89244	1.86343	1.73985	1.84872	6.65e-07	4.06e-07	4.54e-08	1.67e-09	5.63e-09	5.18e-07	NaN	1.2847	0.783782	0.0876175	0.00322012	0.0108771	0.90024	0.0973268	0.110318	0.0291893	1.19392	1.07604	0.864443	0.90669	0.476702	0.0228174
FLD	22	22C 8WT10	75	65	2	8WT10222FLD	005FP3	1.86287	1.89244	1.86343	1.73985	1.84872	2.98e-08	2.42e-08	3.82e-09	2.33e-10	6.68e-10	2.66e-08	NaN	1.12057	0.910367	0.143652	0.00877354	0.0251433	0.90024	0.15957	0.110318	0.0795293	1.19392	0.938567	0.864443	1.05313	0.476702	0.0527442
FLD	22	22C 8WT10	75	65	3	8WT10223FLD	006FP1	1.87535	1.8943	1.86145	1.71724	1.85957	4.79e-08	4.75e-08	1.15e-08	1.93e-09	2.17e-09	4.73e-08	NaN	1.01195	1.00328	0.243352	0.0406923	0.0457915	1.07759	0.22583	0.164461	0.247429	1.2976	0.779866	0.810554	1.23777	0.573216	0.0798853
FLD	1	3	23	23	1	131FLD	001FP3	1.88776	1.90249	1.88946	1.76783	1.87991	7.76e-07	5.2e-07	9.23e-07	7.73e-08	6.25e-09	6.31e-07	NaN	1.23093	0.824294	1.46421	0.122573	0.00991784	0.906749	1.61479	0.0776456	1.57862	1.09732	1.12177	0.95644	0.861836	0.455825	0.021758
FLD	2	3	23	23	1	231FLD	002FP1	1.87608	1.89537	1.88205	1.72199	1.8543	3.31e-07	3.18e-07	3.52e-07	4.94e-08	3.1e-09	3.23e-07	NaN	1.02417	0.984194	1.0894	0.152848	0.00959062	0.75207	1.44854	0.1661	0.920217	1.07309	0.954415	0.946048	1.04032	0.564559	0.0169878
FLD	3	3	23	23	1	331FLD	002FP2	1.87118	1.89254	1.89011	1.72422	1.87263	8.55e-08	8.77e-08	9.08e-08	1.58e-08	3.4e-10	8.58e-08	NaN	0.99622	1.02201	1.05779	0.184588	0.00396194	0.715707	1.47796	0.162288	1.1374	1.26694	0.786323	0.833998	1.22543	0.456103	0.00868652
FLD	3	3	23	23	2	332FLD	009FP2	1.86867	1.88053	1.87899	1.73996	1.85198	8e-07	5.65e-07	7.96e-07	6.76e-08	6.03e-09	6.72e-07	NaN	1.19148	0.84071	1.18577	0.100636	0.00898422	0.70459	1.68292	0.0982326	1.02446	1.01537	1.17344	1.02179	0.822781	0.432925	0.0207523
FLD	1	3	23	23	2	132FLD	011FP1	1.875	1.88906	1.8814	1.72278	1.84935	3.68e-07	4.6e-07	3.24e-07	2.42e-08	3.07e-09	3.85e-07	NaN	0.955601	1.19415	0.840696	0.0628252	0.00797824	0.780389	1.07728	0.143972	0.436369	1.28092	0.746029	0.830475	1.43791	0.596948	0.0133651
FLD	2	3	23	23	2	232FLD	012FP2	1.88245	1.87766	1.86989	1.71715	1.85858	8.83e-08	1.52e-07	7.26e-08	6.43e-09	6.94e-10	1.15e-07	NaN	0.770987	1.33161	0.634337	0.0561435	0.00606079	0.81933	0.774214	0.130602	0.429882	0.892982	0.863384	1.13319	1.1751	0.43295	0.0139988
FLD	8	8C 13WT10	90	100	1	13WT1081FLD	010FP3	1.88543	1.88372	1.85925	1.72716	1.86435	1.16e-06	9.84e-07	2.95e-08	1.85e-09	8.77e-07	1.05e-06	NaN	1.09806	0.933701	0.0279448	0.00175171	0.831816	1.19145	0.0234545	0.168392	0.0104026	0.997579	1.10072	1.08388	0.861444	0.54746	1.51941
FLD	8	8C 13WT10	90	100	2	13WT1082FLD	011FP3	1.88881	1.88016	1.85109	1.72167	1.88629	2.73e-07	5.25e-07	4.29e-09	9.42e-10	1.17e-07	3.74e-07	NaN	0.730082	1.40347	0.0114585	0.00251852	0.312245	1.26525	0.0090563	0.146125	0.0172353	1.02585	0.711683	1.00505	1.39641	0.359094	0.869535
FLD	8	8C 13WT10	90	100	3	13WT1083FLD	012FP3	1.8895	1.90192	1.85731	1.72452	1.89094	2e-06	1.69e-06	1.56e-08	3.74e-09	7.4e-07	1.83e-06	NaN	1.09349	0.919636	0.00853775	0.00203902	0.40378	1.17866	0.00724359	0.176063	0.0115812	1.0656	1.02618	0.963561	0.954414	0.358734	1.12557
FLD	8	8C 8WT10	55	65	1	E9	003 007 FP3	1.5135	1.2735	1.3425	1.452	1.524	1.76e-06	1.04e-06	1.77e-07	1.54e-08	6.52e-07	1.35e-06	NaN	1.3014	0.768401	0.130978	0.0113874	0.482586	1.12769	0.116147	0.261795	0.0434975	1.31456	0.989991	0.76071	1.01011	0.481903	1.00142
FLD	8	8C 8WT10	55	65	2	D7	007 008 FP4	1.766	2.023	2.023	1.205	2.5	1.92e-08	3.92e-08	1.56e-09	5.67e-10	7.66e-09	2.74e-08	NaN	0.699492	1.42961	0.0571313	0.0206919	0.279626	0.915093	0.0624323	0.0815395	0.253765	0.901006	0.776346	1.10987	1.28809	0.46306	0.603866
FLD	8	8C 8WT10	55	65	3	8WT1083FLD	009FP3	1.87988	1.88296	1.87016	1.71813	1.87523	6.63e-07	6.39e-07	6.78e-08	1.84e-08	5.57e-07	6.46e-07	NaN	1.02533	0.989046	0.104869	0.0285295	0.862295	0.972884	0.107792	0.13649	0.209023	0.935877	1.09558	1.08637	0.910414	0.321839	2.67927
FVE	1	1	9	9	1	111FVE	006FP3	1.87135	1.88785	1.86674	1.72318	1.88094	2.46e-09	1.45e-08	3.72e-09	3.14e-09	1.95e-10	5.92e-09	Bad UBC	0.415019	2.44376	0.629137	0.531107	0.0329857	2.43184	0.258708	0.367617	1.44473	3.40765	0.12179	1.5644	1.56211	1.03782	0.0317835
FVE	3	1	9	9	1	G6	007 008 FP3	1.5135	1.2735	1.3425	1.452	1.524	6.32e-09	1.52e-08	4.05e-09	2.59e-09	9.1e-10	9.8e-09	Bad UBC	0.644361	1.55193	0.413318	0.264483	0.0928349	1.12769	0.366519	0.261795	1.01027	1.31456	0.490172	0.76071	2.0401	0.481903	0.192642
FVE	1	1	9	9	2	112FVE	009FP1	1.868	1.8849	1.87638	1.74067	1.84771	3.69e-08	1.01e-07	6.99e-08	1.85e-08	1.7e-09	6.11e-08	NaN	0.604805	1.65912	1.14535	0.303713	0.0278699	0.841732	1.3607	0.0920425	3.29971	1.08201	0.558962	0.963693	1.72163	0.507846	0.0548787
FVE	2	1	9	9	2	212FVE	010FP1	1.8647	1.8809	1.87955	1.72822	1.85484	1.11e-07	6.01e-08	7.42e-08	1.46e-08	1.33e-09	8.1e-08	NaN	1.36956	0.741952	0.915434	0.180583	0.0163813	0.714524	1.28118	0.110966	1.62737	1.045	1.31059	1.0011	0.741135	0.484065	0.0338411
FVE	3	1	9	9	2	312FVE	011FP1	1.875	1.88906	1.8814	1.72278	1.84935	4.97e-08	2.09e-08	1.71e-08	5.09e-09	2.44e-10	3.15e-08	Bad UBC	1.57614	0.662796	0.544039	0.161505	0.00773904	0.780389	0.697139	0.143972	1.12178	1.28092	1.23048	0.830475	0.798093	0.596948	0.0129643
FVE	1	2	16	16	1	121FVE	001FP1	1.86774	1.90213	1.87451	1.71119	1.84445	3.26e-07	2.16e-07	4.04e-07	4.35e-08	3.51e-09	2.65e-07	NaN	1.22948	0.81463	1.52475	0.164131	0.0132567	0.880708	1.73128	0.192921	0.850767	1.13909	1.07935	0.889496	0.915833	0.67031	0.0197769
FVE	2	2	16	16	1	221FVE	001FP2	1.86641	1.8869	1.86963	1.74128	1.85735	5.16e-07	1.91e-07	2.34e-07	1.46e-08	1.44e-09	3.09e-07	NaN	1.67016	0.617524	0.759348	0.0472388	0.00465467	0.82159	0.924243	0.0913827	0.516933	1.17879	1.41685	0.907243	0.680659	0.492102	0.00945874
FVE	3	2	16	16	1	321FVE	001FP2	1.86641	1.8869	1.86963	1.74128	1.85735	2.52e-07	3.08e-07	1.31e-07	1.47e-08	2.28e-09	2.77e-07	NaN	0.910941	1.11216	0.471725	0.0531935	0.00823429	0.82159	0.574161	0.0913827	0.582096	1.17879	0.772779	0.907243	1.22586	0.492102	0.0167329
FVE	2	2	16	16	2	222FVE	009FP2	1.86867	1.88053	1.87899	1.73996	1.85198	4.7e-07	1.91e-07	1.34e-07	2.28e-08	1.73e-09	2.97e-07	NaN	1.58145	0.641256	0.452387	0.0767586	0.00582196	0.70459	0.642057	0.0982326	0.781396	1.01537	1.55751	1.02179	0.627581	0.432925	0.013448
FVE	3	2	16	16	2	322FVE	010FP1	1.8647	1.8809	1.87955	1.72822	1.85484	5.54e-07	2.45e-07	2.29e-07	3.77e-08	2.66e-09	3.68e-07	NaN	1.50685	0.665595	0.62277	0.102633	0.00723825	0.714524	0.871588	0.110966	0.924901	1.045	1.44196	1.0011	0.664861	0.484065	0.014953
FVE	1	2	16	16	2	122FVE	012FP1	1.88099	1.89659	1.87632	1.72076	1.85176	5.54e-08	4.61e-08	8.37e-08	1.55e-08	9.69e-10	5e-08	NaN	1.10829	0.921015	1.67405	0.309411	0.0193613	0.784247	2.13459	0.146598	2.1106	1.05045	1.05506	0.966884	0.95256	0.531422	0.036433
FVE	1	5	37	37	1	151FVE	002FP3	1.88057	1.90335	1.89829	1.7732	1.88871	3.23e-07	1.78e-07	1.01e-07	6.38e-09	2.92e-08	2.36e-07	NaN	1.37007	0.752351	0.428433	0.0270556	0.12384	0.69207	0.619061	0.0619552	0.436696	1.04029	1.31701	0.981386	0.766622	0.33273	0.372194
FVE	3	5	37	37	1	251FVE	002FP3	1.88057	1.90335	1.89829	1.7732	1.88871	4.33e-07	3.34e-07	1.64e-07	1.07e-08	4.38e-08	3.74e-07	NaN	1.1564	0.891716	0.436598	0.0285091	0.116837	0.69207	0.630859	0.0619552	0.460157	1.04029	1.11162	0.981386	0.90863	0.33273	0.351146
FVE	1	5	37	37	2	152FVE	010FP2	1.87255	1.89381	1.86992	1.73219	1.84777	5e-07	5.37e-07	2.26e-07	3.3e-08	3.9e-08	5.13e-07	NaN	0.975557	1.04692	0.440918	0.0643389	0.0761755	1.44712	0.304687	0.202229	0.318149	1.71879	0.567584	0.645878	1.62093	0.919584	0.0828368
FVE	3	5	37	37	2	252FVE	011FP2	1.88374	1.88426	1.87076	1.72274	1.86785	5.49e-07	5.49e-07	2.76e-07	2.2e-08	2.61e-08	5.41e-07	NaN	1.01489	1.01542	0.509753	0.0407464	0.0482046	0.937812	0.543556	0.148047	0.275226	1.08108	0.938779	0.96236	1.05513	0.411209	0.117227
FVE	2	5	37	37	2	352FVE	012FP2	1.88245	1.87766	1.86989	1.71715	1.85858	9.88e-07	4.82e-07	2.76e-07	2.46e-08	4.69e-08	6.81e-07	NaN	1.44989	0.706719	0.405674	0.0360448	0.0687584	0.81933	0.495129	0.130602	0.275989	0.892982	1.62365	1.13319	0.623653	0.43295	0.158814
FVE	3	7	51	51	1	C6	003 007 FP2	2.123	2.1085	2.249	1.432	2.421	3.61e-08	5.57e-08	7.9e-08	1.26e-09	1.4e-08	4.48e-08	NaN	0.804831	1.2425	1.76297	0.0280877	0.311753	0.892497	1.97532	0.051175	0.548855	1.01475	0.793136	0.985468	1.26082	0.362457	0.860111
FVE	3	7	51	51	2	372FVE	016FP7	1.89644	1.88728	1.89109	1.70604	1.89299	3.95e-07	3.28e-07	9.12e-08	6.83e-09	4.35e-08	3.54e-07	NaN	1.11645	0.927583	0.257681	0.019281	0.122783	0.661754	0.389392	0.145177	0.13281	0.87103	1.28175	1.21042	0.766331	0.287181	0.427544
FVE	1	7	51	51	2	172FVE	019FP2	1.90057	1.87824	1.87982	1.7141	1.89634	9.36e-07	9.26e-07	4.34e-07	3.86e-08	2.79e-07	9.25e-07	NaN	1.01198	1.00193	0.469887	0.0417719	0.301403	1.10612	0.424805	0.188318	0.221816	0.95616	1.05838	1.05573	0.949047	0.363931	0.828188
FVE	2	7	51	51	2	272FVE	020FP7	1.88258	1.90751	1.90077	1.72032	1.92048	7.59e-07	8.16e-07	2.56e-07	2.86e-08	1.06e-07	7.66e-07	NaN	0.990956	1.06451	0.334039	0.0372833	0.138232	0.865621	0.385895	0.176728	0.210964	1.16944	0.847378	0.858029	1.24065	0.291904	0.473554
FVE	1	9	65	65	1	191FVE	004FP1	1.86813	1.89054	1.87135	1.70021	1.87385	3.02e-07	3.14e-07	6.78e-08	3.23e-09	2.59e-07	3.07e-07	NaN	0.984084	1.0239	0.220827	0.0105064	0.843443	0.876494	0.251944	0.227034	0.0462768	1.11778	0.880394	0.921858	1.1107	0.389836	2.16359
FVE	2	9	65	65	1	291FVE	004FP2	1.87305	1.89591	1.87559	1.74662	1.87864	9.78e-07	1.06e-06	1.8e-07	1.47e-08	1.02e-06	1.01e-06	NaN	0.964632	1.04606	0.177486	0.0145434	1.00503	1.28987	0.137599	0.0723901	0.200902	1.02024	0.945492	0.833748	1.25465	0.240781	4.17404
FVE	3	9	65	65	1	391FVE	004FP2	1.87305	1.89591	1.87559	1.74662	1.87864	1.45e-06	1.2e-06	2.63e-07	8.53e-09	9.36e-07	1.28e-06	NaN	1.13228	0.939998	0.205497	0.00665918	0.730615	1.28987	0.159316	0.0723901	0.0919902	1.02024	1.10981	0.833748	1.12744	0.240781	3.03436
FVE	1	9	65	65	2	192FVE	013FP1	1.89261	1.89846	1.88809	1.69849	1.89229	5.78e-07	8.85e-07	1.01e-07	1.81e-08	1.04e-06	7.11e-07	NaN	0.812732	1.24451	0.142041	0.0254194	1.46313	1.31204	0.10826	0.362568	0.0701093	1.60658	0.505876	0.981732	1.26767	0.553116	2.64524
FVE	3	9	65	65	2	392FVE	014FP7	1.88408	1.91267	1.90425	1.70712	1.89464	5.83e-07	2.09e-07	5.23e-08	4.89e-09	3.56e-07	3.43e-07	NaN	1.70112	0.610663	0.152468	0.0142544	1.0396	0.861562	0.176967	0.237721	0.0599627	1.19512	1.42339	0.839336	0.727555	0.436104	2.38384
FVE	2	9	65	65	2	292FVE	015FP2	1.90353	1.89417	1.87892	1.71913	1.89298	7.09e-07	6.29e-07	1.79e-07	3.54e-08	7.71e-07	6.65e-07	NaN	1.06567	0.946702	0.269769	0.0533011	1.15921	1.04908	0.257149	0.205684	0.259141	1.0516	1.01339	0.968382	0.977613	0.366226	3.16527
FVE	1	11	79	79	1	1111FVE	006FP3	1.87135	1.88785	1.86674	1.72318	1.88094	1.68e-06	1.71e-06	1.33e-07	1.41e-08	8.38e-07	1.66e-06	NaN	1.01446	1.03163	0.0804109	0.00853684	0.505945	2.43184	0.0330659	0.367617	0.0232221	3.40765	0.297701	1.5644	0.659445	1.03782	0.487505
FVE	3	11	79	79	1	B2	007 008 FP4	1.766	2.023	2.023	1.205	2.5	7.99e-07	6.01e-07	2.62e-08	2.33e-09	5.65e-07	6.93e-07	NaN	1.15339	0.867006	0.0378547	0.00336831	0.815634	0.915093	0.0413671	0.0815395	0.041309	0.901006	1.28012	1.10987	0.781178	0.46306	1.7614
FVE	2	11	79	79	1	E1	007 008 FP4	1.766	2.023	2.023	1.205	2.5	1.44e-06	7.67e-07	2.2e-08	2.28e-09	9.66e-07	1.05e-06	NaN	1.36931	0.730296	0.0209087	0.00216996	0.919167	0.915093	0.0228487	0.0815395	0.0266124	0.901006	1.51975	1.10987	0.658001	0.46306	1.98499
FVE	3	11	79	79	2	3112FVE	014FP4	1.87992	1.91971	1.87856	1.70837	1.88699	6.92e-07	2.59e-07	3.79e-08	6.61e-09	2.89e-07	4.12e-07	NaN	1.68033	0.628695	0.0920984	0.01605	0.702948	1.09719	0.0839403	0.241073	0.0665774	1.21167	1.38679	0.869193	0.723309	0.360863	1.94797
FVE	2	11	79	79	2	2112FVE	015FP3	1.89281	1.89762	1.89592	1.71722	1.92113	1.76e-06	1.59e-06	5.54e-08	5.32e-09	4.43e-07	1.64e-06	NaN	1.07423	0.967645	0.0338351	0.00324668	0.270363	0.898213	0.0376693	0.195903	0.0165729	1.17831	0.911668	0.874314	1.10675	0.28899	0.935545
FVE	3	14	114	114	2	3142FVE	015FP3	1.89281	1.89762	1.89592	1.71722	1.92113	9.12e-07	7.78e-07	2.01e-09	3.4e-09	4.26e-07	8.32e-07	NaN	1.09646	0.935954	0.00242141	0.00408381	0.512395	0.898213	0.00269581	0.195903	0.0208461	1.17831	0.930535	0.874314	1.0705	0.28899	1.77305
FVE	1	14	114	114	1	1141FVE	016FP1	1.86993	1.90488	1.87282	1.61217	1.88073	7.35e-07	7.59e-07	1.03e-09	4.55e-09	4.71e-07	7.11e-07	NaN	1.03439	1.06768	0.00145367	0.00640825	0.662763	0.841387	0.00172771	1.23341	0.00519555	1.11887	0.924489	0.887676	1.20278	0.360456	1.83868
FVE	2	14	114	114	1	2141FVE	017FP1	1.87546	1.88935	1.87213	NaN	1.8794	6.72e-08	1.8e-07	3.75e-10	NaN	8.94e-08	1.08e-07	Missing values	0.620133	1.65871	0.00346012	NaN	0.824593	1.0257	0.00337343	0.246117	NaN	1.18187	0.524704	0.843762	1.96585	0.443765	1.85818
FVE	3	14	114	114	1	3141FVE	018FP1	1.87818	1.88808	1.8758	NaN	1.88665	1.02e-06	7.79e-07	2.46e-09	NaN	5.88e-07	8.87e-07	Missing values	1.14745	0.879186	0.00277693	NaN	0.663803	0.884537	0.00313942	0.115537	NaN	1.0584	1.08413	0.897426	0.979675	0.344665	1.92594
FVE	1	14	114	114	2	1142FVE	019FP2	1.90057	1.87824	1.87982	1.7141	1.89634	7.19e-07	8.75e-07	5.3e-10	6.34e-09	7.78e-07	7.65e-07	NaN	0.940991	1.14397	0.000693113	0.00828538	1.01697	1.10612	0.000626614	0.188318	0.0439967	0.95616	0.984135	1.05573	1.08359	0.363931	2.7944
FVE	2	14	114	114	2	2142FVE	020FP2	1.90785	1.89962	1.88201	1.68971	1.90013	3.18e-07	4.46e-07	2.23e-09	8.68e-09	3.6e-07	3.75e-07	NaN	0.847986	1.18937	0.00595439	0.023156	0.959353	1.25034	0.00476223	0.3489	0.0663686	0.987811	0.85845	1.02211	1.16364	0.418299	2.29346
FVE	2	15	128	128	1	2151FVE	014FP1	1.89092	1.8987	1.87583	1.68581	1.89428	4.43e-07	3.9e-07	8.77e-09	8.79e-10	6.27e-07	4.12e-07	NaN	1.07612	0.946534	0.0212877	0.00213365	1.5222	1.19098	0.0178741	0.405493	0.00526186	1.29674	0.829866	0.844208	1.12121	0.417674	3.64447
FVE	3	15	128	128	1	3151FVE	015FP1	1.88579	1.88749	1.87612	1.70145	1.88913	1.5e-06	2.31e-06	1.31e-09	4.01e-10	1.39e-06	1.84e-06	NaN	0.812858	1.25414	0.000712961	0.000217648	0.753048	1.15935	0.000614964	0.301099	0.000722845	1.24228	0.654329	0.860931	1.45673	0.463419	1.62498
FVE	2	15	128	128	2	2152FVE	017FP3	1.87941	1.89809	1.85559	NaN	1.89286	2.91e-07	3.78e-07	2.91e-10	NaN	1.58e-07	3.27e-07	Missing values	0.889564	1.156	0.000890824	NaN	0.485148	1.42603	0.00062469	0.239244	NaN	1.16481	0.7637	0.874626	1.3217	0.398456	1.21757
FVE	3	15	128	128	2	3152FVE	018FP2	1.88126	1.88502	1.87016	NaN	1.89438	6.66e-07	4.64e-07	6.77e-10	NaN	5.01e-07	5.45e-07	Missing values	1.22227	0.851835	0.00124208	NaN	0.91888	1.1424	0.00108726	0.29813	NaN	1.16813	1.04635	0.866349	0.983247	0.404033	2.27427
FVE	1	15	128	128	2	1152FVE	020FP3	1.8778	1.90697	1.86206	1.71413	1.91182	6.04e-07	4.01e-07	4.3e-10	1.33e-09	3.76e-07	4.84e-07	NaN	1.24726	0.828303	0.000888017	0.00274854	0.775721	1.48009	0.000599976	0.190239	0.0144479	1.2726	0.980089	0.79661	1.03978	0.297273	2.60946
FVE	1	13	100	100	1	1131FVE	004FP3	1.87999	1.89718	1.86015	1.72219	1.88538	1.8e-06	1.11e-06	9.05e-09	8.75e-10	9.75e-07	1.37e-06	NaN	1.30964	0.809557	0.00659148	0.000637588	0.710143	1.28987	0.00511017	0.179254	0.0035569	1.25463	1.04385	0.833748	0.970985	0.413129	1.71894
FVE	2	13	100	100	1	2131FVE	005FP1	1.87074	1.88866	1.86393	1.73025	1.87136	2.844e-06	3.13e-06	5.03e-08	1.33e-07	1.86e-06	2.94e-06	NaN	0.968012	1.06681	0.0171296	0.0453716	0.632282	0.87872	0.0194938	0.123899	0.366199	0.989991	0.977799	1.01214	1.05401	0.335857	1.88259
FVE	3	13	100	100	1	3131FVE	005FP2	1.87738	1.895	1.87672	1.73259	1.86768	2.08e-06	2.6e-06	2.23e-08	1.1e-08	3.77e-06	2.24e-06	NaN	0.926022	1.15835	0.009929	0.00489892	1.68054	0.850419	0.0116754	0.142996	0.0342591	1.08724	0.851718	0.937791	1.23518	0.424808	3.95601
FVE	2	13	100	100	2	2132FVE	017FP3	1.87941	1.89809	1.85559	1.70262	1.89286	4.87e-07	3.21e-07	2.39e-09	5.59e-10	2.73e-07	3.88e-07	NaN	1.25354	0.826092	0.00615607	0.00143961	0.702969	1.42603	0.00431694	0.239244	0.00601735	1.16481	1.07618	0.874626	0.944509	0.398456	1.76423
FVE	3	13	100	100	2	3132FVE	018FP2	1.88126	1.88502	1.87016	1.68571	1.89438	5.42e-07	4.97e-07	1.67e-08	8.02e-09	4.84e-07	5.08e-07	NaN	1.06579	0.97707	0.0328056	0.0157747	0.951777	1.1424	0.0287163	0.29813	0.0529123	1.16813	0.91239	0.866349	1.1278	0.404033	2.35569
FVE	1	13	100	100	2	1132FVE	019FP3	1.89621	1.89562	1.88374	1.70489	1.9038	7.91e-07	5.47e-07	5.93e-09	1.04e-09	7.21e-07	6.54e-07	NaN	1.20948	0.836992	0.00907188	0.00159606	1.10225	1.05274	0.00861741	0.249768	0.00639017	1.07757	1.12241	0.937987	0.892328	0.358514	3.07449
FVE	1	17	156	156	1	1171 FVE	T17 FP1	1.87875	1.87217	1.86863	1.69041	1.87207	9.33e-07	7.76e-07	2.51e-10	4.11e-09	7.32e-07	8.51e-07	NaN	1.0968	0.911739	0.000294774	0.00483328	0.859957	1.15354	0.00025554	0.232756	0.0207655	1.0991	0.997913	0.909836	1.00209	0.455106	1.88958
FVE	2	17	156	156	1	2171 FVE	T17 FP2	1.86756	1.86273	1.86623	1.68869	1.87493	5.98e-07	2.65e-07	5.55e-10	4.52e-10	1.83e-07	3.98e-07	NaN	1.50212	0.665726	0.00139263	0.00113434	0.458786	1.06957	0.00130204	0.222511	0.0050979	1.08395	1.38578	0.922548	0.721617	0.377291	1.216
FVE	3	17	156	156	1	3171 FVE	T17 FP2	1.86756	1.86273	1.86623	1.68869	1.87493	1.83e-06	9.04e-07	2.35e-10	8.03e-12	4.39e-07	1.29e-06	NaN	1.42107	0.703693	0.00018255	6.25e-06	0.341193	1.06957	0.000170676	0.222511	2.81e-05	1.08395	1.31101	0.922548	0.762771	0.377291	0.904323
FVE	1	17	156	156	2	1172 FVE	T17 FP3	1.87141	1.85894	1.87842	1.70743	1.8995	9.74e-07	9.81e-07	1.21e-10	NaN	2.31e-07	9.77e-07	NaN	0.996451	1.00356	0.00012359	NaN	0.236856	0.995003	0.000124211	0.154747	NaN	1.11643	0.892533	0.895712	1.12041	0.26627	0.889536
FVE	2	17	156	156	2	2172 FVE	T17 FP4	1.88299	1.87427	1.85002	1.70246	1.88145	4.27e-09	2.27e-09	2.26e-12	NaN	1.94e-09	3.11e-09	Bad UBC	1.37046	0.729684	0.000726587	NaN	0.62241	1.50587	NaN	NaN	NaN	NaN	NaN	NaN	NaN	NaN	NaN
FVE	3	17	156	156	2	3172 FVE	T17 FP5	1.8793	1.89836	1.8706	1.69511	1.88532	1.79e-06	7.42e-07	1.26e-10	1.61e-09	3.62e-07	1.15e-06	NaN	1.55253	0.644111	0.000109776	0.00139738	0.314097	0.856659	0.000128144	0.208815	0.00669199	1.02319	1.51735	0.977339	0.659045	0.261137	1.20281
FVE	22	22C 13WT10	110	100	2	G7	003 007 FP2	2.123	2.1085	2.249	1.432	2.421	NaN	3e-07	2.26e-09	4.38e-10	5.01e-09	NaN	NaN	NaN	NaN	NaN	NaN	NaN	0.892497	NaN	0.051175	NaN	1.01475	NaN	0.985468	NaN	0.362457	NaN
FVE	22	22C 13WT10	110	100	1	13WT10221FVE	006FP2	1.88265	1.89284	1.87491	1.75695	1.87568	9.33e-07	1.1e-06	2.23e-09	3.93e-10	1.11e-08	1.01e-06	NaN	0.922143	1.09006	0.0022043	0.000388077	0.0109314	0.865121	0.00254797	0.0688171	0.00563926	1.00911	0.913821	0.999189	1.09094	0.389581	0.0280594
FVE	22	22C 13WT10	110	100	3	B1	007 008 FP4	1.766	2.023	2.023	1.205	2.5	2.78e-09	1.13e-08	1.35e-10	NaN	8.74e-10	5.61e-09	Bad UBC	0.495162	2.01954	0.0240833	NaN	0.155825	0.915093	0.0263179	0.0815395	NaN	0.901006	0.549565	1.10987	1.81962	0.46306	0.336512
FVE	22	22C 8WT10	75	65	2	8WT10222FVE	005FP2	1.87738	1.895	1.87672	1.73259	1.86768	7.81e-07	8.67e-07	2.14e-08	1.33e-09	1.41e-08	8.2e-07	NaN	0.953454	1.05731	0.0260883	0.00162015	0.0172626	0.850419	0.0306769	0.142996	0.01133	1.08724	0.876949	0.937791	1.12745	0.424808	0.0406362
FVE	22	22C 8WT10	75	65	1	8WT10221FVE	005FP3	1.86287	1.89244	1.86343	1.73985	1.84872	1.14e-06	5.26e-07	5.99e-09	6.49e-10	1.29e-09	7.68e-07	NaN	1.48757	0.684885	0.00780101	0.000845895	0.00168197	0.90024	0.00866547	0.110318	0.00766777	1.19392	1.24596	0.864443	0.792285	0.476702	0.00352835
FVE	22	22C 8WT10	75	65	3	8WT10223FVE	006FP1	1.87535	1.8943	1.86145	1.71724	NaN	4.33e-08	4.06e-08	4.05e-09	1.55e-09	NaN	4.19e-08	Missing values	1.03389	0.969018	0.0966778	0.0371227	NaN	1.07759	0.0897167	0.164461	0.225724	1.2976	0.79677	0.810554	1.1955	0.573216	NaN
FVE	1	3	23	23	1	131FVE	001FP3	1.88776	1.90249	1.88946	1.76783	1.87991	5.89e-07	3.59e-07	2.8e-07	1.34e-08	5.56e-09	4.52e-07	NaN	1.30266	0.793282	0.619578	0.0296716	0.0122936	0.906749	0.683296	0.0776456	0.382142	1.09732	1.18713	0.95644	0.829411	0.455825	0.0269701
FVE	2	3	23	23	1	231FVE	002FP1	1.87608	1.89537	1.88205	1.72199	1.8543	2.12e-07	1.96e-07	1.61e-07	1.4e-08	3.6e-09	2.01e-07	NaN	1.05622	0.974195	0.800826	0.0695243	0.0179417	0.75207	1.06483	0.1661	0.418569	1.07309	0.984277	0.946048	1.02975	0.564559	0.03178
FVE	3	3	23	23	1	331FVE	002FP2	1.87118	1.89254	1.89011	1.72422	1.87263	2.88e-07	2.77e-07	1.9e-07	1.52e-08	1.89e-09	2.79e-07	NaN	1.03219	0.994685	0.680452	0.0544397	0.00678649	0.715707	0.95074	0.162288	0.33545	1.26694	0.814717	0.833998	1.19267	0.456103	0.0148793
FVE	3	3	23	23	2	332FVE	009FP2	1.86867	1.88053	1.87899	1.73996	1.85198	1.03e-06	7.1e-07	8.71e-07	4.86e-08	9.87e-09	8.45e-07	NaN	1.21969	0.839467	1.02995	0.0574584	0.0116737	0.70459	1.46177	0.0982326	0.584922	1.01537	1.20122	1.02179	0.821564	0.432925	0.0269647
FVE	1	3	23	23	2	132FVE	011FP2	1.88374	1.88426	1.87076	1.72274	1.86785	3.97e-07	6.76e-07	5.37e-07	2.67e-08	1.05e-08	5.1e-07	NaN	0.778581	1.32436	1.05287	0.0523316	0.0206304	0.937812	1.12268	0.148047	0.353479	1.08108	0.72019	0.96236	1.37616	0.411209	0.0501701
FVE	2	3	23	23	2	232FVE	012FP2	1.88245	1.87766	1.86989	1.71715	1.85858	3.42e-06	6.58e-07	1.04e-06	8.57e-08	2.67e-08	1.48e-06	NaN	2.30928	0.44357	0.700677	0.0578148	0.0179988	0.81933	0.855184	0.130602	0.442678	0.892982	2.58603	1.13319	0.391434	0.43295	0.0415724
FVE	8	8C 13WT10	90	100	1	13WT1081FVE	010FP3	1.88543	1.88372	1.85925	1.72716	1.86435	5.71e-07	9.16e-07	1.06e-06	2.21e-07	5.91e-07	7.18e-07	NaN	0.795264	1.27515	1.47532	0.308237	0.823366	1.19145	1.23826	0.168392	1.83047	0.997579	0.797193	1.08388	1.17647	0.54746	1.50398
FVE	8	8C 13WT10	90	100	2	13WT1082FVE	011FP3	1.88881	1.88016	1.85109	1.72167	1.88629	6.57e-07	8.97e-07	4.98e-09	1.59e-09	1.52e-07	7.45e-07	NaN	0.881719	1.20384	0.00667805	0.0021291	0.2036	1.26525	0.00527803	0.146125	0.0145704	1.02585	0.859499	1.00505	1.19779	0.359094	0.566982
FVE	8	8C 13WT10	90	100	3	13WT1083FVE	012FP3	1.8895	1.90192	1.85731	1.72452	1.89094	1.58e-06	9.45e-07	2.84e-09	3.28e-09	9.07e-07	1.21e-06	NaN	1.30172	0.778197	0.00233556	0.00270211	0.74677	1.17866	0.00198153	0.176063	0.0153474	1.0656	1.22158	0.963561	0.807626	0.358734	2.08168
FVE	8	8C 8WT10	55	65	1	C10	003 007 FP3	1.5135	1.2735	1.3425	1.452	1.524	5.47e-07	3.68e-07	2.59e-08	4.48e-09	2e-07	4.49e-07	NaN	1.21912	0.820263	0.0578002	0.0099831	0.444623	1.12769	0.0512556	0.261795	0.0381332	1.31456	0.927398	0.76071	1.07829	0.481903	0.92264
FVE	8	8C 8WT10	55	65	2	H7	007 008 FP4	1.766	2.023	2.023	1.205	2.5	9.54e-07	1.4e-06	3.72e-08	2.85e-09	5.95e-07	1.15e-06	NaN	0.826759	1.20954	0.0322122	0.00247147	0.515226	0.915093	0.035201	0.0815395	0.0303102	0.901006	0.917596	1.10987	1.0898	0.46306	1.11266
FVE	8	8C 8WT10	55	65	3	8WT1083FVE	009FP3	1.87988	1.88296	1.87016	1.71813	1.87523	1.17e-06	1.2e-06	5.78e-08	8.5e-09	7.94e-07	1.18e-06	NaN	0.995619	1.01936	0.0490368	0.0072073	0.673486	0.972884	0.0504035	0.13649	0.0528045	0.935877	1.06384	1.08637	0.938317	0.321839	2.09262
LOV	3	1	9	9	1	E6	003 007 FP3	1.5135	1.2735	1.3425	1.452	1.524	5.58e-09	1.02e-08	1.64e-08	8.26e-09	1.18e-09	7.56e-09	Bad UBC	0.738215	1.35462	2.17169	1.09198	0.155594	1.12769	1.92579	0.261795	4.17111	1.31456	0.561568	0.76071	1.78073	0.481903	0.322874
LOV	1	1	9	9	1	111LOV	006FP2	1.88265	1.89284	1.87491	1.75695	1.87568	3.72e-09	1.95e-08	1.55e-08	5.29e-09	6.42e-10	8.52e-09	Bad UBC	0.437043	2.28849	1.82478	0.620681	0.0753127	0.865121	2.10927	0.0688171	9.0193	1.00911	0.433099	0.999189	2.29034	0.389581	0.193317
LOV	1	1	9	9	2	112LOV	009FP1	1.868	1.8849	1.87638	1.74067	1.84771	2.42e-07	2.06e-07	5.99e-07	1.38e-07	2.24e-09	2.22e-07	NaN	1.09041	0.929277	2.69624	0.620407	0.0100786	0.841732	3.2032	0.0920425	6.74044	1.08201	1.00776	0.963693	0.964288	0.507846	0.0198458
LOV	2	1	9	9	2	212LOV	010FP1	1.8647	1.8809	1.87955	1.72822	1.85484	1.6e-08	8.65e-09	3.68e-08	1.22e-08	1.86e-10	1.17e-08	Bad UBC	1.36685	0.739763	3.14509	1.04239	0.0158933	0.714524	4.40166	0.110966	9.39373	1.045	1.30799	1.0011	0.738948	0.484065	0.032833
LOV	3	1	9	9	2	312LOV	011FP1	1.875	1.88906	1.8814	1.72278	1.84935	1.09e-07	6.53e-08	2.16e-07	3.62e-08	3.97e-10	8.29e-08	NaN	1.31027	0.787248	2.61005	0.43715	0.00478211	0.780389	3.34455	0.143972	3.03634	1.28092	1.02292	0.830475	0.947948	0.596948	0.00801094
LOV	1	2	16	16	1	121LOV	001FP1	1.86774	1.90213	1.87451	1.71119	1.84445	1.14e-06	3.05e-07	9.85e-07	1.87e-07	4.45e-09	5.84e-07	NaN	1.95141	0.521309	1.68578	0.320032	0.00761679	0.880708	1.91412	0.192921	1.65888	1.13909	1.71314	0.889496	0.586072	0.67031	0.0113631
LOV	2	2	16	16	1	221LOV	001FP2	1.86641	1.8869	1.86963	1.74128	1.85735	4.1e-07	2.54e-07	1.02e-06	9.6e-08	2.15e-09	3.23e-07	NaN	1.2696	0.78842	3.17442	0.297541	0.00666555	0.82159	3.86375	0.0913827	3.25599	1.17879	1.07704	0.907243	0.869028	0.492102	0.0135451
LOV	3	2	16	16	1	321LOV	001FP2	1.86641	1.8869	1.86963	1.74128	1.85735	1.84e-07	1.46e-07	3.05e-07	4.24e-08	1.01e-09	1.63e-07	NaN	1.12729	0.891052	1.86274	0.259658	0.00619966	0.82159	2.26723	0.0913827	2.84143	1.17879	0.956312	0.907243	0.982153	0.492102	0.0125983
LOV	2	2	16	16	2	222LOV	009FP1	1.868	1.8849	1.87638	1.74067	1.84771	2.91e-07	2.62e-07	9.09e-07	8.97e-08	2.24e-09	2.74e-07	NaN	1.06212	0.957083	3.32114	0.32783	0.00817162	0.841732	3.9456	0.0920425	3.56172	1.08201	0.981616	0.963693	0.993141	0.507846	0.0160908
LOV	3	2	16	16	2	322LOV	010FP2	1.87255	1.89381	1.86992	1.73219	1.84777	1.11e-06	2.54e-07	1.22e-06	2.41e-07	2.39e-09	5.29e-07	NaN	2.10528	0.480543	2.30921	0.455033	0.00451067	1.44712	1.59573	0.202229	2.25009	1.71879	1.22486	0.645878	0.744015	0.919584	0.00490512
LOV	1	2	16	16	2	122LOV	012FP1	1.88099	1.89659	1.87632	1.72076	1.85176	2.85e-09	9.27e-10	3.86e-09	9.12e-10	6.2e-13	1.58e-09	Bad UBC	1.79536	0.585249	2.43556	0.575452	0.000391473	0.784247	3.10561	0.146598	3.92537	1.05045	1.70913	0.966884	0.605294	0.531422	0.000736652
LOV	1	5	37	37	1	151LOV	002FP2	1.87118	1.89254	1.89011	1.72422	1.87263	7.21e-08	5.96e-08	1.11e-07	1.75e-08	2.13e-08	6.53e-08	NaN	1.10398	0.911973	1.69949	0.267444	0.325287	0.715707	2.37456	0.162288	1.64796	1.26694	0.871382	0.833998	1.0935	0.456103	0.713189
LOV	3	5	37	37	1	251LOV	002FP3	1.88057	1.90335	1.89829	1.7732	1.88871	3.59e-07	4.37e-07	5.06e-07	3.98e-08	6.29e-08	3.91e-07	NaN	0.919918	1.1201	1.29572	0.101885	0.160932	0.69207	1.87224	0.0619552	1.64449	1.04029	0.88429	0.981386	1.14134	0.33273	0.483673
LOV	1	5	37	37	2	152LOV	010FP3	1.88543	1.88372	1.85925	1.72716	1.86435	3.38e-07	1.43e-07	3.08e-07	5.07e-08	2.06e-08	2.16e-07	NaN	1.56704	0.663839	1.42913	0.234759	0.0956097	1.19145	1.19949	0.168392	1.39412	0.997579	1.57084	1.08388	0.612466	0.54746	0.174642
LOV	3	5	37	37	2	252LOV	011FP3	1.88881	1.88016	NaN	NaN	NaN	5.7e-10	1.52e-10	NaN	NaN	NaN	3.63e-10	Bad UBC	1.57115	0.419075	NaN	NaN	NaN	1.26525	NaN	NaN	NaN	NaN	NaN	NaN	NaN	NaN	NaN
LOV	2	5	37	37	2	352LOV	012FP3	1.8895	1.90192	1.85731	1.72452	1.89094	1.32e-08	7.52e-09	5.77e-08	7.41e-09	7.84e-10	9.79e-09	Bad UBC	1.34335	0.767919	5.89278	0.756998	0.0800712	1.17866	4.99955	0.176063	4.2996	1.0656	1.26066	0.963561	0.796959	0.358734	0.223205
LOV	3	7	51	51	1	E6	003 007 FP2	2.123	2.1085	2.249	1.432	2.421	1.3e-06	1.2e-06	6.62e-07	4.39e-08	2.57e-07	1.25e-06	NaN	1.04081	0.960793	0.53078	0.0351845	0.206114	0.892497	0.594714	0.051175	0.687532	1.01475	1.02568	0.985468	0.974961	0.362457	0.568658
LOV	3	7	51	51	2	372LOV	016FP7	1.89644	1.88728	1.89109	1.70604	1.89299	2.22e-07	3.9e-07	5.84e-07	1.25e-07	8.66e-08	2.86e-07	NaN	0.774198	1.36023	2.04079	0.437876	0.302314	0.661754	3.08391	0.145177	3.01614	0.87103	0.88883	1.21042	1.12376	0.287181	1.0527
LOV	1	7	51	51	2	172LOV	019FP2	1.90057	1.87824	1.87982	1.7141	1.89634	3.63e-07	2.2e-07	3.69e-07	4.6e-08	9.31e-08	2.78e-07	NaN	1.30604	0.792276	1.32814	0.165496	0.334826	1.10612	1.20071	0.188318	0.878811	0.95616	1.36593	1.05573	0.750456	0.363931	0.920025
LOV	2	7	51	51	2	272LOV	020FP2	1.90785	1.89962	1.88201	1.68971	1.90013	1.91e-07	1.81e-07	2.91e-07	4.01e-08	1.08e-07	1.85e-07	NaN	1.03008	0.975717	1.57446	0.21685	0.585119	1.25034	1.25923	0.3489	0.621525	0.987811	1.04279	1.02211	0.954613	0.418299	1.39881
LOV	1	9	65	65	1	191LOV	004FP1	1.86813	1.89054	1.87135	1.70021	1.87385	4.44e-08	4.36e-08	6.01e-08	5.18e-09	5.55e-08	4.31e-08	NaN	1.02992	1.01185	1.39455	0.120317	1.28825	0.876494	1.59105	0.227034	0.529949	1.11778	0.921403	0.921858	1.09762	0.389836	3.30459
LOV	2	9	65	65	1	291LOV	004FP2	1.87305	1.89591	1.87559	1.74662	1.87864	7.27e-07	4.56e-07	5.3e-07	6.27e-08	6.77e-07	5.66e-07	NaN	1.28463	0.80464	0.936684	0.110846	1.19521	1.28987	0.726182	0.0723901	1.53123	1.02024	1.25914	0.833748	0.965087	0.240781	4.96387
LOV	3	9	65	65	1	391LOV	004FP3	1.87999	1.89718	1.86015	1.72219	1.88538	2.59e-08	2.33e-08	2.65e-08	2.03e-09	3.63e-08	2.38e-08	Bad UBC	1.08763	0.976149	1.11194	0.0852992	1.52351	1.28987	0.862056	0.179254	0.475856	1.25463	0.866893	0.833748	1.1708	0.413129	3.68773
LOV	1	9	65	65	2	192LOV	013FP1	1.89261	1.89846	1.88809	1.69849	1.89229	1.71e-07	3.44e-07	1.43e-07	3.31e-08	4.83e-07	2.41e-07	NaN	0.711031	1.43019	0.594283	0.137405	2.00541	1.31204	0.452947	0.362568	0.378976	1.60658	0.442573	0.981732	1.45681	0.553116	3.62566
LOV	3	9	65	65	2	392LOV	014FP7	1.88408	1.91267	1.90425	1.70712	1.89464	5.29e-07	1.53e-07	1.51e-07	3.54e-08	3.12e-07	2.79e-07	NaN	1.89463	0.54921	0.539571	0.127028	1.11643	0.861562	0.626271	0.237721	0.534357	1.19512	1.58531	0.839336	0.654339	0.436104	2.56001
LOV	2	9	65	65	2	292LOV	015FP2	1.90353	1.89417	1.87892	1.71913	1.89298	1.11e-06	7.19e-07	4.79e-07	5.96e-08	6.68e-07	8.8e-07	NaN	1.26025	0.816689	0.544907	0.0676998	0.758638	1.04908	0.519416	0.205684	0.329145	1.0516	1.19841	0.968382	0.843355	0.366226	2.0715
LOV	1	11	79	79	1	1111LOV	006FP3	1.87135	1.88785	1.86674	1.72318	1.88094	1.5e-06	7.25e-07	1.5e-07	2.52e-08	8.17e-07	1.03e-06	NaN	1.4553	0.705276	0.1461	0.0244596	0.79441	2.43184	0.0600779	0.367617	0.0665354	3.40765	0.427068	1.5644	0.450829	1.03782	0.765456
LOV	3	11	79	79	1	G4	007 008 FP4	1.766	2.023	2.023	1.205	2.5	5.81e-06	6.18e-06	9.69e-07	5.69e-08	5.71e-06	5.99e-06	NaN	0.969767	1.03118	0.161694	0.00950005	0.953499	0.915093	0.176697	0.0815395	0.116509	0.901006	1.07632	1.10987	0.929096	0.46306	2.05913
LOV	1	11	79	79	2	1112LOV	013FP3	NaN	1.89314	NaN	NaN	NaN	NaN	4.42e-11	NaN	NaN	NaN	1.77e-11	Bad UBC	NaN	2.50582	NaN	NaN	NaN	0.866381	NaN	0.096316	NaN	0.939115	NaN	1.16709	NaN	0.242664	NaN
LOV	3	11	79	79	2	3112LOV	014FP4	1.87992	1.91971	1.87856	1.70837	1.88699	1.02e-06	5.39e-07	1.79e-07	5.33e-08	4.79e-07	7.13e-07	NaN	1.43789	0.756465	0.251154	0.0748145	0.671733	1.09719	0.228906	0.241073	0.31034	1.21167	1.1867	0.869193	0.870308	0.360863	1.86146
LOV	2	11	79	79	2	2112LOV	015FP3	1.89281	1.89762	1.89592	1.71722	1.92113	9.51e-07	7.86e-07	2.03e-07	1.89e-08	4.66e-07	8.42e-07	NaN	1.12948	0.933635	0.240643	0.0224605	0.553684	0.898213	0.267913	0.195903	0.114651	1.17831	0.958557	0.874314	1.06785	0.28899	1.91593
LOV	3	14	114	114	2	3142LOV	015FP2	1.90353	1.89417	1.87892	1.71913	1.89298	3.81e-07	8.06e-07	4.07e-08	3.53e-09	5.67e-07	5.45e-07	NaN	0.698496	1.47791	0.0745767	0.00648127	1.03993	1.04908	0.0710879	0.205684	0.0315108	1.0516	0.664224	0.968382	1.52616	0.366226	2.83959
LOV	1	14	114	114	1	1141LOV	016FP6	1.8662	1.90549	1.89735	1.72908	1.88794	1.32e-06	5.22e-07	7.02e-09	2.94e-09	8.75e-07	8.12e-07	NaN	1.62963	0.64319	0.00865208	0.00362793	1.07824	0.773496	0.0111857	0.122447	0.0296285	1.33059	1.22474	0.748278	0.859559	0.401535	2.68529
LOV	2	14	114	114	1	2141LOV	017FP2	1.88289	1.8966	1.87626	1.68928	1.90023	7.07e-07	3.29e-07	1.49e-08	2.22e-09	6.36e-07	4.75e-07	NaN	1.48969	0.691916	0.0314003	0.0046728	1.33953	1.07709	0.0291529	0.291836	0.0160117	1.1308	1.31738	0.896035	0.772198	0.346238	3.86881
LOV	3	14	114	114	1	3141LOV	018FP1	1.87818	1.88808	1.8758	1.73444	1.88665	1.58e-06	9.93e-07	4.72e-08	2.78e-09	1.21e-06	1.23e-06	NaN	1.28699	0.808401	0.0384095	0.00226246	0.985743	0.884537	0.0434233	0.115537	0.0195821	1.0584	1.21597	0.897426	0.9008	0.344665	2.86001
LOV	1	14	114	114	2	1142LOV	019FP2	1.90057	1.87824	1.87982	1.7141	1.89634	1.46e-06	1.41e-06	3.25e-08	3.93e-09	1.59e-06	1.42e-06	NaN	1.02661	0.992869	0.0229155	0.00276942	1.12309	1.10612	0.0207169	0.188318	0.0147061	0.95616	1.07368	1.05573	0.940461	0.363931	3.08599
LOV	2	14	114	114	2	2142LOV	020FP3	1.8778	1.90697	1.86206	1.71413	1.91182	1.07e-06	5.61e-07	2.07e-08	8.11e-10	6.23e-07	7.52e-07	NaN	1.42007	0.745367	0.0275005	0.00107855	0.828754	1.48009	0.0185803	0.190239	0.00566948	1.2726	1.11588	0.79661	0.935673	0.297273	2.78786
LOV	1	15	128	128	1	1151LOV	013FP1	1.89261	1.89846	1.88809	1.69849	1.89229	3.63e-07	6.59e-07	4.27e-09	6.01e-10	6.72e-07	4.8e-07	NaN	0.756658	1.37441	0.00890895	0.00125231	1.40065	1.31204	0.00679017	0.362568	0.003454	1.60658	0.470973	0.981732	1.39999	0.553116	2.5323
LOV	2	15	128	128	1	2151LOV	014FP1	1.89092	1.8987	1.87583	1.68581	1.89428	1.04e-06	5e-07	9.17e-09	4.68e-09	9.08e-07	7.09e-07	NaN	1.46893	0.705251	0.0129269	0.00660671	1.28076	1.19098	0.0108541	0.405493	0.016293	1.29674	1.13279	0.844208	0.835399	0.417674	3.0664
LOV	3	15	128	128	1	3151LOV	015FP1	1.88579	1.88749	1.87612	1.70145	1.88913	9.97e-07	9.89e-07	7.6e-09	1.71e-09	8.03e-07	9.65e-07	NaN	1.03414	1.02579	0.00788077	0.00177027	0.832755	1.15935	0.00679755	0.301099	0.00587935	1.24228	0.832454	0.860931	1.19149	0.463419	1.79698
LOV	2	15	128	128	2	2152LOV	017FP3	1.87941	1.89809	1.85559	NaN	1.89286	5.23e-07	4.05e-07	9.35e-09	NaN	4.31e-07	4.58e-07	Missing values	1.14275	0.885587	0.0204417	NaN	0.942507	1.42603	0.0143347	0.239244	NaN	1.16481	0.981062	0.874626	1.01253	0.398456	2.3654
LOV	3	15	128	128	2	3152LOV	018FP2	1.88126	1.88502	1.87016	1.68571	1.89438	3.07e-07	3.29e-07	4.53e-09	5.32e-09	3.78e-07	3.15e-07	NaN	0.975931	1.04756	0.0144071	0.0169101	1.20233	1.1424	0.0126112	0.29813	0.0567204	1.16813	0.835467	0.866349	1.20916	0.404033	2.97581
LOV	1	15	128	128	2	1152LOV	020FP3	1.8778	1.90697	1.86206	1.71413	1.91182	1.71e-06	7.4e-07	1.38e-08	1.59e-09	6.54e-07	1.11e-06	NaN	1.5429	0.666743	0.0124287	0.00143365	0.589754	1.48009	0.00839724	0.190239	0.00753605	1.2726	1.2124	0.79661	0.836975	0.297273	1.98388
LOV	1	13	100	100	1	1131LOV	004FP3	1.87999	1.89718	1.86015	1.72219	1.88538	3.46e-06	1.93e-06	2.31e-07	2.1e-08	4.52e-06	2.54e-06	NaN	1.36344	0.760333	0.0910348	0.00827658	1.78011	1.28987	0.0705765	0.179254	0.0461723	1.25463	1.08673	0.833748	0.911945	0.413129	4.30884
LOV	2	13	100	100	1	2131LOV	005FP1	1.87074	1.88866	1.86393	1.73025	1.87136	1.92e-07	2.35e-07	2.08e-08	2.14e-09	2.43e-07	2.11e-07	NaN	0.908547	1.11044	0.098287	0.0101426	1.15267	0.87872	0.111852	0.123899	0.0818622	0.989991	0.917733	1.01214	1.09712	0.335857	3.43201
LOV	3	13	100	100	1	3131LOV	005FP2	1.87738	1.895	1.87672	1.73259	1.86768	1.02e-06	7.91e-07	1.23e-07	9.36e-09	1.25e-06	8.86e-07	NaN	1.14597	0.893487	0.13834	0.0105691	1.4081	0.850419	0.162673	0.142996	0.0739115	1.08724	1.05401	0.937791	0.952757	0.424808	3.31467
LOV	2	13	100	100	2	2132LOV	017FP2	1.88289	1.8966	1.87626	1.68928	1.90023	1.9e-07	2.13e-07	2.6e-08	3.83e-09	4.03e-07	1.94e-07	NaN	0.976408	1.09524	0.133706	0.0197164	2.07479	1.07709	0.124137	0.291836	0.06756	1.1308	0.863466	0.896035	1.22232	0.346238	5.99239
LOV	3	13	100	100	2	3132LOV	018FP1	1.87818	1.88808	1.8758	1.73444	1.88665	6.19e-07	5.2e-07	5.56e-08	1.18e-09	8.97e-07	5.57e-07	NaN	1.11095	0.933582	0.0998274	0.00211993	1.61058	0.884537	0.112858	0.115537	0.0183485	1.0584	1.04964	0.897426	1.04029	0.344665	4.67289
LOV	1	13	100	100	2	1132LOV	019FP3	1.89621	1.89562	1.88374	1.70489	1.9038	2.76e-09	2.59e-09	2.11e-10	1.64e-09	5.27e-09	2.58e-09	Bad UBC	1.07135	1.00396	0.0817941	0.638191	2.04467	1.05274	0.0776965	0.249768	2.55514	1.07757	0.994227	0.937987	1.07034	0.358514	5.70318
LOV	1	17	156	156	1	1171 LOV	T17 FP1	1.87875	1.87217	1.86863	1.69041	1.87207	7.92e-07	7.51e-07	3.61e-09	5.6e-10	4.76e-07	7.71e-07	NaN	1.02689	0.973816	0.0046747	0.000725579	0.617144	1.15354	0.0040525	0.232756	0.00311734	1.0991	0.9343	0.909836	1.07032	0.455106	1.35604
LOV	2	17	156	156	1	2171 LOV	T17 FP2	1.86756	1.86273	1.86623	1.68869	1.87493	1.72e-06	7.79e-07	3.78e-09	1.62e-09	4.62e-07	1.16e-06	NaN	1.48751	0.672265	0.00326288	0.00140129	0.398578	1.06957	0.00305064	0.222511	0.00629765	1.08395	1.3723	0.922548	0.728705	0.377291	1.05642
LOV	3	17	156	156	1	3171 LOV	T17 FP2	1.86756	1.86273	1.86623	1.68869	1.87493	1.14e-06	1.1e-06	7.93e-09	2.56e-09	3.13e-07	1.12e-06	NaN	1.01694	0.983344	0.00708317	0.0022841	0.279463	1.06957	0.00662244	0.222511	0.0102651	1.08395	0.938174	0.922548	1.0659	0.377291	0.740708
LOV	1	17	156	156	2	1172 LOV	T17 FP3	1.87141	1.85894	1.87842	1.70743	1.8995	1.05e-06	6.13e-07	3.22e-09	NaN	3.04e-07	8.01e-07	NaN	1.30547	0.766006	0.00402519	NaN	0.380043	0.995003	0.0040454	0.154747	NaN	1.11643	1.16933	0.895712	0.855192	0.26627	1.42729
LOV	2	17	156	156	2	2172 LOV	T17 FP4	1.88299	1.87427	1.85002	1.70246	1.88145	1.99e-06	9.63e-07	5.45e-09	1.29e-09	9.07e-07	1.39e-06	NaN	1.43902	0.694915	0.00393483	0.000930401	0.654453	1.50587	0.00261299	0.211762	0.00439362	1.01314	1.42037	0.987035	0.704044	0.357668	1.82978
LOV	3	17	156	156	2	3172 LOV	T17 FP4	1.88299	1.87427	1.85002	1.70246	1.88145	9.83e-07	5.21e-07	3.4e-09	8.07e-10	3.73e-07	7.16e-07	NaN	1.37365	0.727988	0.00474408	0.00112651	0.520958	1.50587	0.00315039	0.211762	0.00531969	1.01314	1.35584	0.987035	0.737551	0.357668	1.45654
LOV	22	22C 13WT10	110	100	1	13WT10221LOV	006FP2	1.88265	1.89284	1.87491	1.75695	1.87568	1.72e-06	5.72e-07	4.84e-08	4.85e-09	9.51e-09	9.9e-07	NaN	1.73693	0.578365	0.0488532	0.00490417	0.00960954	0.865121	0.0564697	0.0688171	0.0712639	1.00911	1.72125	0.999189	0.578834	0.389581	0.0246664
LOV	22	22C 13WT35	135	100	2	13WT3522CLOV2	017FP1	1.87546	1.88935	1.87213	1.69524	1.8794	1.61e-07	1.28e-07	2.61e-08	1.06e-08	8.32e-09	1.43e-07	NaN	1.12541	0.892415	0.182088	0.0743212	0.0581243	1.0257	0.177527	0.246117	0.301974	1.18187	0.952222	0.843762	1.05766	0.443765	0.13098
LOV	22	22C 13WT35	135	100	3	13WT3522CLOV3	017FP1	1.87546	1.88935	1.87213	1.69524	1.8794	9.31e-08	1.67e-07	3.54e-08	1.7e-08	1.32e-09	1.24e-07	NaN	0.752798	1.34845	0.286008	0.137221	0.0107046	1.0257	0.278842	0.246117	0.557542	1.18187	0.636953	0.843762	1.59815	0.443765	0.0241223
LOV	22	22C 8WT10	75	65	1	8WT10221LOV	005FP3	1.86287	1.89244	1.86343	1.73985	1.84872	4.61e-07	3.29e-07	2.56e-07	2.21e-08	4.62e-09	3.87e-07	NaN	1.19319	0.84982	0.662856	0.0571111	0.0119595	0.90024	0.73631	0.110318	0.517694	1.19392	0.999394	0.864443	0.983084	0.476702	0.0250881
LOV	22	22C 8WT10	75	65	2	8WT10222LOV	005FP3	1.86287	1.89244	1.86343	1.73985	1.84872	2.69e-07	2.23e-07	2.36e-07	1.46e-08	8.48e-09	2.42e-07	NaN	1.11032	0.921155	0.974075	0.0601014	0.035041	0.90024	1.08202	0.110318	0.5448	1.19392	0.929977	0.864443	1.06561	0.476702	0.0735072
LOV	22	22C 8WT10	75	65	3	8WT10223LOV	006FP1	1.87535	1.8943	1.86145	1.71724	1.85957	4.84e-07	2.72e-07	3.82e-07	5.21e-08	2.23e-09	3.57e-07	NaN	1.35504	0.761429	1.07	0.146095	0.00625799	1.07759	0.992954	0.164461	0.888327	1.2976	1.04427	0.810554	0.939394	0.573216	0.0109173
LOV	22	22C 8WT35	100	65	2	8WT3522CLOV2	016FP1	1.86993	1.90488	1.87282	1.61217	1.88073	5.04e-07	3.49e-07	5.57e-07	4.78e-07	1.38e-08	4.09e-07	NaN	1.23295	0.854671	1.36329	1.17063	0.0338318	0.841387	1.62029	1.23341	0.949096	1.11887	1.10196	0.887676	0.962818	0.360456	0.0938583
LOV	22	22C 8WT35	100	65	3	8WT3522CLOV3	016FP1	1.86993	1.90488	1.87282	1.61217	1.88073	4.45e-07	5.92e-07	6.95e-07	9.24e-07	8.75e-09	5e-07	NaN	0.889845	1.18498	1.3903	1.84964	0.0175111	0.841387	1.65238	1.23341	1.49961	1.11887	0.795305	0.887676	1.33493	0.360456	0.0485803
LOV	1	3	23	23	1	131LOV	001FP3	1.88776	1.90249	1.88946	1.76783	1.87991	7.34e-07	5.2e-07	2.34e-06	7.32e-08	1.83e-08	5.87e-07	NaN	1.2503	0.886422	3.99158	0.124647	0.031242	0.906749	4.40208	0.0776456	1.60533	1.09732	1.13941	0.95644	0.926794	0.455825	0.0685395
LOV	2	3	23	23	1	231LOV	002FP1	1.87608	1.89537	1.88205	1.72199	1.8543	1.08e-07	7.11e-08	2.04e-07	2.51e-08	1.35e-09	8.67e-08	NaN	1.24416	0.820062	2.35235	0.289585	0.0155674	0.75207	3.12783	0.1661	1.74344	1.07309	1.15942	0.946048	0.86683	0.564559	0.0275743
LOV	3	3	23	23	1	331LOV	002FP1	1.87608	1.89537	1.88205	1.72199	1.8543	1.09e-07	1.14e-07	4.06e-07	4.63e-08	1.42e-09	1.09e-07	NaN	1.00077	1.04738	3.71194	0.423703	0.0129505	0.75207	4.93562	0.1661	2.55089	1.07309	0.932605	0.946048	1.10711	0.564559	0.022939
LOV	3	3	23	23	2	332LOV	009FP3	1.87988	1.88296	1.87016	1.71813	1.87523	2.53e-07	2.55e-07	1.06e-06	1.88e-07	3.18e-09	2.52e-07	NaN	1.00353	1.0096	4.21754	0.745985	0.0126068	0.972884	4.33509	0.13649	5.46549	0.935877	1.07229	1.08637	0.929337	0.321839	0.0391713
LOV	1	3	23	23	2	132LOV	011FP1	1.875	1.88906	NaN	1.72278	NaN	5.57e-10	7.88e-11	NaN	6.57e-11	NaN	2.9e-10	Bad UBC	1.92175	0.271628	NaN	0.226612	NaN	0.780389	NaN	NaN	NaN	NaN	NaN	NaN	NaN	NaN	NaN
LOV	2	3	23	23	2	232LOV	012FP2	1.88245	1.87766	1.86989	1.71715	1.85858	2.8e-07	1.75e-07	6.81e-07	8.17e-08	3.81e-09	2.22e-07	NaN	1.26622	0.791683	3.07276	0.368686	0.017178	0.81933	3.75033	0.130602	2.82297	0.892982	1.41796	1.13319	0.69863	0.43295	0.0396766
LOV	8	8C 13WT10	90	100	1	13WT1081LOV	010FP3	1.88543	1.88372	1.85925	1.72716	1.86435	7.77e-07	7.37e-07	5.11e-09	2.82e-09	3.91e-07	7.47e-07	NaN	1.03927	0.986372	0.00683194	0.00377498	0.522963	1.19145	0.00573415	0.168392	0.0224178	0.997579	1.04179	1.08388	0.910039	0.54746	0.955255
LOV	8	8C 13WT10	90	100	2	13WT1082LOV	011FP3	1.88881	1.88016	1.85109	1.72167	1.88629	9.11e-07	1.49e-06	5.02e-08	4.9e-09	5.32e-07	1.15e-06	NaN	0.794419	1.2992	0.043796	0.00427349	0.463738	1.26525	0.0346144	0.146125	0.0292454	1.02585	0.774399	1.00505	1.29266	0.359094	1.29141
LOV	8	8C 13WT10	90	100	3	13WT1083LOV	012FP3	1.8895	1.90192	1.85731	1.72452	1.89094	1.61e-06	1.45e-06	1.31e-07	7.09e-09	1.18e-06	1.48e-06	NaN	1.08943	0.981005	0.0885113	0.00478624	0.796618	1.17866	0.0750947	0.176063	0.0271849	1.0656	1.02237	0.963561	1.0181	0.358734	2.22064
LOV	8	8C 8WT10	55	65	1	C11	003 007 FP3	1.5135	1.2735	1.3425	1.452	1.524	NaN	3.49e-07	9.57e-08	9.9e-09	2.22e-07	NaN	NaN	NaN	NaN	NaN	NaN	NaN	1.12769	NaN	0.261795	NaN	1.31456	NaN	0.76071	NaN	0.481903	NaN
LOV	8	8C 8WT10	55	65	3	8WT1083LOV	009FP3	1.87988	1.88296	1.87016	1.71813	1.87523	2.86e-07	3.98e-07	9.19e-08	1.99e-08	3.98e-07	3.37e-07	NaN	0.84906	1.18062	0.272954	0.0590798	1.18206	0.972884	0.280562	0.13649	0.43285	0.935877	0.907235	1.08637	1.08675	0.321839	3.67284
NDX	1	1	9	9	1	111NDX	006FP2	1.88265	1.89284	1.87491	1.75695	1.87568	4.91e-09	2.71e-08	1.35e-08	6.85e-09	1.05e-09	1.15e-08	Bad UBC	0.428207	2.36377	1.17513	0.597207	0.0916578	0.865121	1.35834	0.0688171	8.67818	1.00911	0.424343	0.999189	2.36569	0.389581	0.235273
NDX	3	1	9	9	1	E6	007 008 FP1	1.87329	1.89506	1.87916	1.73378	1.87786	5.01e-09	1.58e-08	6.95e-09	1.94e-09	1.04e-09	8.9e-09	Bad UBC	0.562829	1.77674	0.780342	0.217892	0.11675	0.982724	0.794061	0.181607	1.1998	1.17757	0.477958	0.849207	2.09223	0.514649	0.226854
NDX	1	1	9	9	2	112NDX	009FP1	1.868	1.8849	1.87638	1.74067	1.84771	2.39e-08	4.54e-08	7.54e-08	1.47e-08	4.84e-09	3.29e-08	NaN	0.725757	1.37873	2.29155	0.447292	0.147007	0.841732	2.72242	0.0920425	4.85962	1.08201	0.670746	0.963693	1.43068	0.507846	0.289472
NDX	2	1	9	9	2	212NDX	010FP1	1.8647	1.8809	1.87955	1.72822	1.85484	1.9e-08	1.55e-08	2.09e-08	6.94e-09	1.44e-09	1.7e-08	Bad UBC	1.11583	0.90764	1.22823	0.40761	0.0843399	0.714524	1.71895	0.110966	3.67328	1.045	1.06778	1.0011	0.90664	0.484065	0.174233
NDX	3	1	9	9	2	312NDX	011FP1	1.875	1.88906	1.8814	1.72278	1.84935	1.85e-08	7.18e-08	6.65e-08	1.66e-08	3.25e-09	3.49e-08	NaN	0.530721	2.05591	1.9058	0.476186	0.0931693	0.780389	2.44211	0.143972	3.30748	1.28092	0.414329	0.830475	2.47559	0.596948	0.156076
NDX	1	2	16	16	1	121NDX	001FP1	1.86774	1.90213	1.87451	1.71119	1.84445	1.25e-08	1.13e-08	3.06e-08	8.42e-09	2.89e-09	1.18e-08	Bad UBC	1.06037	0.963867	2.59525	0.715382	0.245564	0.880708	2.94678	0.192921	3.70816	1.13909	0.930892	0.889496	1.08361	0.67031	0.366344
NDX	2	2	16	16	1	221NDX	001FP2	1.86641	1.8869	1.86963	1.74128	1.85735	6.55e-10	6.11e-10	7.9e-10	1.8e-10	1.17e-10	6.28e-10	Bad UBC	1.04333	0.973385	1.25829	0.286728	0.187045	0.82159	1.53153	0.0913827	3.13766	1.17879	0.885087	0.907243	1.0729	0.492102	0.380094
NDX	3	2	16	16	1	321NDX	001FP2	1.86641	1.8869	1.86963	1.74128	1.85735	1.36e-07	1.19e-07	1.77e-07	3.33e-08	6.97e-09	1.26e-07	NaN	1.08494	0.947095	1.41006	0.264618	0.0553765	0.82159	1.71626	0.0913827	2.89571	1.17879	0.920392	0.907243	1.04393	0.492102	0.11253
NDX	2	2	16	16	2	222NDX	009FP2	1.86867	1.88053	1.87899	1.73996	1.85198	7.76e-07	6.14e-07	6.59e-07	1.9e-07	3.44e-08	6.79e-07	NaN	1.14233	0.903148	0.96934	0.279507	0.0507089	0.70459	1.37575	0.0982326	2.84535	1.01537	1.12504	1.02179	0.883887	0.432925	0.117131
NDX	3	2	16	16	2	322NDX	010FP2	1.87255	1.89381	1.86992	1.73219	1.84777	3.7e-07	2.08e-07	2.76e-07	1.22e-07	2.99e-08	2.77e-07	NaN	1.33671	0.749811	0.997864	0.441517	0.107971	1.44712	0.689552	0.202229	2.18326	1.71879	0.777703	0.645878	1.16092	0.919584	0.117413
NDX	1	2	16	16	2	122NDX	012FP1	1.88099	1.89659	1.87632	1.72076	1.85176	1.21e-06	5.75e-07	1.69e-06	4.53e-07	6.36e-08	8.26e-07	NaN	1.46487	0.696433	2.04093	0.548119	0.0769653	0.784247	2.6024	0.146598	3.73892	1.05045	1.39451	0.966884	0.720286	0.531422	0.144829
NDX	1	5	37	37	1	151NDX	002FP3	1.88057	1.90335	1.89829	1.7732	1.88871	6.19e-07	5.03e-07	4.81e-07	2.99e-08	2e-07	5.5e-07	NaN	1.12581	0.914329	0.874171	0.054308	0.3629	0.69207	1.26313	0.0619552	0.87657	1.04029	1.08221	0.981386	0.931671	0.33273	1.09068
NDX	3	5	37	37	1	251NDX	002FP3	1.88057	1.90335	1.89829	1.7732	1.88871	6.56e-07	4.17e-07	3.39e-07	3.33e-08	1.49e-07	4.99e-07	NaN	1.31579	0.836613	0.680269	0.066729	0.297888	0.69207	0.982949	0.0619552	1.07705	1.04029	1.26483	0.981386	0.852481	0.33273	0.895285
NDX	1	5	37	37	2	152NDX	010FP2	1.87255	1.89381	1.86992	1.73219	1.84777	7.68e-07	7.54e-07	5.26e-07	2.28e-07	3.92e-07	7.6e-07	NaN	1.01087	0.992622	0.692891	0.299821	0.516294	1.44712	0.478807	0.202229	1.48258	1.71879	0.588132	0.645878	1.53686	0.919584	0.561442
NDX	3	5	37	37	2	252NDX	011FP2	1.88374	1.88426	1.87076	1.72274	1.86785	4.46e-07	9.73e-07	8.2e-07	8.18e-08	2.17e-07	6.54e-07	NaN	0.681233	1.48737	1.25389	0.125112	0.331205	0.937812	1.33703	0.148047	0.845081	1.08108	0.630142	0.96236	1.54554	0.411209	0.805442
NDX	2	5	37	37	2	352NDX	012FP2	1.88245	1.87766	1.86989	1.71715	1.85858	1.9e-08	9.87e-08	3.65e-08	2.79e-09	1.04e-08	4.27e-08	NaN	0.444533	2.31348	0.855244	0.0653451	0.243023	0.81933	1.04383	0.130602	0.500337	0.892982	0.497807	1.13319	2.04156	0.43295	0.561319
NDX	1	7	51	51	1	E2	003 007 FP1	1.87329	1.89506	1.87916	1.73378	1.87786	5.55e-08	6.43e-08	3.78e-08	1.64e-09	2.51e-08	5.97e-08	NaN	0.929442	1.07591	0.632368	0.0274692	0.420135	0.982724	0.643485	0.181607	0.151256	1.17757	0.789289	0.849207	1.26696	0.514649	0.816354
NDX	2	7	51	51	1	E4	003 007 FP1	1.87329	1.89506	1.87916	1.73378	1.87786	2.99e-08	5.15e-08	1.03e-07	8.2e-09	7.34e-09	3.92e-08	NaN	0.762749	1.31105	2.63611	0.209	0.187019	0.982724	2.68245	0.181607	1.15084	1.17757	0.647732	0.849207	1.54385	0.514649	0.363391
NDX	3	7	51	51	2	372NDX	016FP7	1.89644	1.88728	1.89109	1.70604	1.89299	6.83e-07	9.76e-07	4.78e-07	1.17e-07	3.97e-07	8.09e-07	NaN	0.844176	1.20605	0.590552	0.144953	0.490835	0.661754	0.892405	0.145177	0.998455	0.87103	0.96917	1.21042	0.99639	0.287181	1.70915
NDX	1	7	51	51	2	172NDX	019FP2	1.90057	1.87824	1.87982	1.7141	1.89634	8.88e-07	8.2e-07	3.28e-07	1.28e-08	2.2e-07	8.37e-07	NaN	1.06062	0.979654	0.391306	0.0153235	0.262309	1.10612	0.353763	0.188318	0.0813703	0.95616	1.10925	1.05573	0.927944	0.363931	0.720766
NDX	2	7	51	51	2	272NDX	020FP2	1.90785	1.89962	1.88201	1.68971	1.90013	4.22e-07	3.79e-07	1.71e-07	3.84e-08	1.49e-07	3.96e-07	NaN	1.0653	0.957506	0.431658	0.0969686	0.377319	1.25034	0.345233	0.3489	0.277927	0.987811	1.07845	1.02211	0.936796	0.418299	0.902033
NDX	1	9	65	65	1	191NDX	004FP1	1.86813	1.89054	1.87135	1.70021	1.87385	1.01e-06	6.87e-07	1.92e-07	2.97e-08	9.43e-07	8.1e-07	NaN	1.24074	0.847643	0.237117	0.0366279	1.16302	0.876494	0.270529	0.227034	0.161332	1.11778	1.11	0.921858	0.919494	0.389836	2.98337
NDX	2	9	65	65	1	291NDX	004FP1	1.86813	1.89054	1.87135	1.70021	1.87385	5.1e-07	7.22e-07	1.38e-07	1.98e-08	9.2e-07	5.98e-07	NaN	0.85393	1.20818	0.231491	0.0331379	1.53973	0.876494	0.26411	0.227034	0.14596	1.11778	0.763954	0.921858	1.31059	0.389836	3.94969
NDX	3	9	65	65	1	391NDX	004FP2	1.87305	1.89591	1.87559	1.74662	1.87864	1.82e-06	1.52e-06	4.18e-07	1.39e-08	1.84e-06	1.62e-06	NaN	1.12442	0.939887	0.258077	0.00859172	1.13389	1.28987	0.200079	0.0723901	0.118686	1.02024	1.10211	0.833748	1.1273	0.240781	4.70924
NDX	1	9	65	65	2	192NDX	013FP2	1.89904	1.90271	1.9034	1.70761	1.889	7.2e-07	7.07e-07	1.19e-07	3.02e-08	8.5e-07	6.94e-07	NaN	1.03619	1.01856	0.171496	0.0434451	1.22422	0.764524	0.224318	0.233327	0.186198	0.946251	1.09505	1.13119	0.900433	0.356246	3.43645
NDX	3	9	65	65	2	392NDX	014FP7	1.88408	1.91267	1.90425	1.70712	1.89464	3.42e-07	2.68e-07	1.35e-07	1.23e-08	5.83e-07	3.01e-07	NaN	1.1349	0.889574	0.447451	0.0407108	1.93478	0.861562	0.519349	0.237721	0.171255	1.19512	0.949612	0.839336	1.05986	0.436104	4.43652
NDX	2	9	65	65	2	292NDX	015FP2	1.90353	1.89417	1.87892	1.71913	1.89298	3.86e-07	4.82e-07	1.96e-07	2.06e-08	5.48e-07	4.3e-07	NaN	0.899087	1.12266	0.456477	0.0479597	1.27524	1.04908	0.435122	0.205684	0.233172	1.0516	0.854973	0.968382	1.15932	0.366226	3.48211
NDX	1	11	79	79	1	1111NDX	006FP3	1.87135	1.88785	1.86674	1.72318	1.88094	1.33e-06	1.31e-06	9.74e-08	2.09e-08	9.18e-07	1.3e-06	NaN	1.01982	1.00784	0.0749365	0.0160896	0.706219	2.43184	0.0308148	0.367617	0.0437672	3.40765	0.299274	1.5644	0.644233	1.03782	0.68048
NDX	3	11	79	79	1	C4	007 008 FP4	1.766	2.023	2.023	1.205	2.5	1.06e-06	9.64e-07	5.8e-08	5.98e-09	8.06e-07	1.01e-06	NaN	1.0487	0.953565	0.0573671	0.00591338	0.797648	0.915093	0.0626899	0.0815395	0.0725217	0.901006	1.16392	1.10987	0.859168	0.46306	1.72256
NDX	1	11	79	79	2	1112NDX	013FP3	1.88302	1.89314	NaN	NaN	NaN	1.93e-10	1.07e-11	NaN	NaN	NaN	3.54e-12	Bad UBC	54.4144	3.00511	NaN	NaN	NaN	0.866381	NaN	0.096316	NaN	0.939115	NaN	1.16709	NaN	0.242664	NaN
NDX	3	11	79	79	2	3112NDX	014FP4	1.87992	1.91971	1.87856	1.70837	1.88699	9.06e-07	5.78e-07	8.64e-08	2.35e-08	1.03e-06	7.08e-07	NaN	1.27865	0.8162	0.122034	0.033194	1.45826	1.09719	0.111225	0.241073	0.137693	1.21167	1.05528	0.869193	0.939032	0.360863	4.04103
NDX	2	11	79	79	2	2112NDX	015FP3	1.89281	1.89762	1.89592	1.71722	1.92113	1.12e-06	9.2e-07	5.99e-08	3.12e-09	3.9e-07	9.86e-07	NaN	1.13435	0.933353	0.0607692	0.00316036	0.3951	0.898213	0.0676556	0.195903	0.0161323	1.17831	0.962693	0.874314	1.06753	0.28899	1.36717
NDX	3	14	114	114	2	3142NDX	015FP2	1.90353	1.89417	1.87892	1.71913	1.89298	5.33e-07	9.74e-07	9.54e-09	1.7e-09	9.76e-07	7.13e-07	NaN	0.747208	1.36598	0.0133854	0.00238103	1.36948	1.04908	0.0127592	0.205684	0.0115761	1.0516	0.710545	0.968382	1.41058	0.366226	3.73945
NDX	1	14	114	114	1	1141NDX	016FP6	1.8662	1.90549	1.89735	1.72908	1.88794	6.3e-07	6.74e-07	9.1e-08	3.39e-08	7.6e-07	6.27e-07	NaN	1.00522	1.07529	0.145142	0.0541697	1.21265	0.773496	0.187644	0.122447	0.442392	1.33059	0.755468	0.748278	1.43701	0.401535	3.02002
NDX	2	14	114	114	1	2141NDX	017FP2	1.88289	1.8966	1.87626	NaN	1.90023	2.85e-07	3.81e-07	3.31e-09	NaN	4.18e-07	3.21e-07	Missing values	0.889164	1.18904	0.0103191	NaN	1.30258	1.07709	0.00958055	0.291836	NaN	1.1308	0.786314	0.896035	1.32701	0.346238	3.7621
NDX	3	14	114	114	1	3141NDX	018FP1	1.87818	1.88808	1.8758	1.73444	1.88665	5.56e-07	6.19e-07	6.15e-09	7.96e-10	1.01e-06	5.78e-07	NaN	0.962638	1.07116	0.010648	0.00137729	1.75079	0.884537	0.0120379	0.115537	0.0119208	1.0584	0.909518	0.897426	1.19359	0.344665	5.07969
NDX	1	14	114	114	2	1142NDX	019FP2	1.90057	1.87824	1.87982	1.7141	1.89634	1.33e-06	1.58e-06	1.46e-08	1.76e-08	1.43e-06	1.43e-06	NaN	0.931754	1.10313	0.0101986	0.0123125	1.00153	1.10612	0.00922009	0.188318	0.0653813	0.95616	0.974475	1.05573	1.0449	0.363931	2.75197
NDX	2	14	114	114	2	2142NDX	020FP2	1.90785	1.89962	1.88201	1.68971	1.90013	2.13e-07	3.2e-07	4.39e-09	1.4e-09	3.77e-07	2.6e-07	NaN	0.821253	1.23121	0.0169117	0.00540626	1.45229	1.25034	0.0135257	0.3489	0.0154951	0.987811	0.831387	1.02211	1.20458	0.418299	3.4719
NDX	1	15	128	128	1	1151NDX	013FP1	1.89261	1.89846	1.88809	1.69849	1.89229	8.78e-07	1.33e-06	4.71e-09	7.35e-10	2.37e-06	1.07e-06	NaN	0.818246	1.24068	0.0043878	0.000684703	2.20885	1.31204	0.00334427	0.362568	0.00188848	1.60658	0.509308	0.981732	1.26376	0.553116	3.99346
NDX	2	15	128	128	1	2151NDX	014FP1	1.89092	1.8987	1.87583	1.68581	1.89428	7.79e-07	6.96e-07	3.92e-09	3.09e-09	1.41e-06	7.32e-07	NaN	1.06363	0.950118	0.00535028	0.00421693	1.92941	1.19098	0.00449235	0.405493	0.0103995	1.29674	0.820234	0.844208	1.12545	0.417674	4.61941
NDX	3	15	128	128	1	3151NDX	015FP1	1.88579	1.88749	1.87612	1.70145	1.88913	1.01e-06	1.58e-06	5.13e-09	1.05e-09	1.46e-06	1.26e-06	NaN	0.802623	1.24783	0.00406056	0.000829636	1.16028	1.15935	0.00350243	0.301099	0.00275536	1.24228	0.64609	0.860931	1.44939	0.463419	2.50374
NDX	2	15	128	128	2	2152NDX	017FP3	1.87941	1.89809	1.85559	1.70262	1.89286	5.1e-07	6.35e-07	4.29e-09	6.89e-10	7.55e-07	5.65e-07	NaN	0.903094	1.125	0.00759345	0.00122023	1.33759	1.42603	0.0053249	0.239244	0.00510035	1.16481	0.775316	0.874626	1.28627	0.398456	3.35693
NDX	3	15	128	128	2	3152NDX	018FP2	1.88126	1.88502	1.87016	1.68571	1.89438	4.97e-07	4.52e-07	1.94e-09	8.81e-09	9.96e-07	4.7e-07	NaN	1.05871	0.96179	0.00413885	0.0187512	2.11967	1.1424	0.00362293	0.29813	0.062896	1.16813	0.90633	0.866349	1.11016	0.404033	5.24629
NDX	1	15	128	128	2	1152NDX	020FP3	1.8778	1.90697	1.86206	1.71413	1.91182	1.29e-06	6.26e-07	1.99e-09	1.9e-09	5.74e-07	8.85e-07	NaN	1.46085	0.70794	0.00225402	0.00214497	0.648608	1.48009	0.0015229	0.190239	0.0112752	1.2726	1.14793	0.79661	0.88869	0.297273	2.18186
NDX	1	13	100	100	1	1131NDX	004FP3	1.87999	1.89718	1.86015	1.72219	1.88538	2.47e-08	2.73e-08	1.16e-09	5.67e-10	5.2e-08	2.47e-08	Bad UBC	0.999636	1.10681	0.0471554	0.022968	2.10623	1.28987	0.0365581	0.179254	0.128131	1.25463	0.796761	0.833748	1.32751	0.413129	5.09825
NDX	2	13	100	100	1	2131NDX	005FP1	1.87074	1.88866	1.86393	1.73025	1.87136	1.06e-06	1.44e-06	6.97e-08	5.59e-09	1.985e-06	1.23e-06	NaN	0.85873	1.17198	0.0566819	0.00454205	1.61389	0.87872	0.0645051	0.123899	0.0366595	0.989991	0.867412	1.01214	1.15792	0.335857	4.80527
NDX	3	13	100	100	1	3131NDX	005FP1	1.87074	1.88866	1.86393	1.73025	1.87136	3.12e-07	3.18e-07	1.14e-08	1.5e-09	4.74e-07	3.09e-07	NaN	1.0092	1.02913	0.0366929	0.00486457	1.53232	0.87872	0.0417572	0.123899	0.0392625	0.989991	1.0194	1.01214	1.01678	0.335857	4.56241
NDX	2	13	100	100	2	2132NDX	017FP3	1.87941	1.89809	1.85559	NaN	1.89286	9.96e-08	1.38e-07	6.01e-09	NaN	1.31e-07	1.15e-07	Missing values	0.865325	1.19877	0.0522247	NaN	1.13685	1.42603	0.0366225	0.239244	NaN	1.16481	0.742891	0.874626	1.37061	0.398456	2.85314
NDX	3	13	100	100	2	3132NDX	018FP2	1.88126	1.88502	1.87016	1.68571	1.89438	5.53e-07	4.14e-07	1.96e-08	4.75e-09	7e-07	4.73e-07	NaN	1.16975	0.874834	0.0414396	0.0100419	1.4795	1.1424	0.0362741	0.29813	0.0336828	1.16813	1.00139	0.866349	1.00979	0.404033	3.66181
NDX	1	13	100	100	2	1132NDX	019FP3	1.89621	1.89562	1.88374	1.70489	1.9038	3.11e-07	4.09e-07	8.31e-09	1.16e-09	3.46e-07	3.48e-07	NaN	0.892643	1.17548	0.0238609	0.00334167	0.992425	1.05274	0.0226656	0.249768	0.0133791	1.07757	0.828383	0.937987	1.25319	0.358514	2.76817
NDX	1	17	156	156	1	1171 NDX	T17 FP1	1.87875	1.87217	1.86863	1.69041	1.87207	4.38e-06	1.86e-06	3.2e-09	2.14e-09	1.85e-06	2.86e-06	NaN	1.53372	0.65201	0.00111951	0.000748115	0.64612	1.15354	0.000970503	0.232756	0.00321416	1.0991	1.39543	0.909836	0.716624	0.455106	1.41971
NDX	2	17	156	156	1	2171 NDX	T17 FP1	1.87875	1.87217	1.86863	1.69041	1.87207	3.62e-07	3.22e-07	1.49e-09	1.05e-09	1.48e-07	3.42e-07	NaN	1.06039	0.943047	0.00436154	0.00306344	0.431777	1.15354	0.00378102	0.232756	0.0131616	1.0991	0.964784	0.909836	1.0365	0.455106	0.94874
NDX	3	17	156	156	1	3171 NDX	T17 FP2	1.86756	1.86273	1.86623	1.68869	1.87493	1.43e-06	1.47e-06	9.64e-10	6.57e-10	6.46e-07	1.45e-06	NaN	0.98557	1.01464	0.000663919	0.000452248	0.445053	1.06957	0.000620734	0.222511	0.00203248	1.08395	0.909236	0.922548	1.09982	0.377291	1.1796
NDX	1	17	156	156	2	1172 NDX	T17 FP3	1.87141	1.85894	1.87842	1.70743	1.8995	1.78e-06	1.06e-06	1.91e-09	9.46e-10	3.41e-07	1.37e-06	NaN	1.29632	0.771413	0.00139044	0.000687888	0.248104	0.995003	0.00139743	0.154747	0.00444523	1.11643	1.16113	0.895712	0.861229	0.26627	0.931776
NDX	2	17	156	156	2	2172 NDX	T17 FP4	1.88299	1.87427	1.85002	1.70246	1.88145	1.44e-06	8.79e-07	5.67e-10	NaN	4.98e-07	1.13e-06	NaN	1.28127	0.780476	0.000503051	NaN	0.442178	1.50587	0.00033406	0.211762	NaN	1.01314	1.26466	0.987035	0.790728	0.357668	1.23628
NDX	3	17	156	156	2	3172 NDX	T17 FP4	1.88299	1.87427	1.85002	1.70246	1.88145	2.21e-07	2.27e-07	1.51e-10	2.7e-09	7.39e-08	2.24e-07	NaN	0.986115	1.01408	0.000676584	0.0120867	0.33014	1.50587	0.000449297	0.211762	0.0570768	1.01314	0.97333	0.987035	1.0274	0.357668	0.923035
NDX	3	17	156	156	1	3171NDX	016FP7	NaN	1.88728	NaN	NaN	1.89299	NaN	1.2e-10	NaN	NaN	4.74e-09	1.2e-10	Bad UBC	NaN	1.00001	NaN	NaN	39.665	0.661754	NaN	0.145177	NaN	0.87103	NaN	1.21042	NaN	0.287181	NaN
NDX	3	17	156	156	1	3171NDX	016FP7	NaN	1.88728	NaN	NaN	1.89299	NaN	1.2e-10	NaN	NaN	4.74e-09	1.2e-10	Bad UBC	NaN	1.00001	NaN	NaN	39.665	0.661754	NaN	0.145177	NaN	0.87103	NaN	1.21042	NaN	0.287181	NaN
NDX	22	22C 13WT10	110	100	2	C7	003 007 FP2	2.123	2.1085	2.249	1.432	2.421	NaN	1.15e-08	NaN	NaN	5.3e-10	NaN	Bad UBC	NaN	NaN	NaN	NaN	NaN	0.892497	NaN	0.051175	NaN	1.01475	NaN	0.985468	NaN	0.362457	NaN
NDX	22	22C 13WT10	110	100	1	13WT10221NDX	006FP2	1.88265	1.89284	1.87491	1.75695	1.87568	1.65e-06	1.1e-06	2.31e-08	1.46e-09	2.17e-07	1.33e-06	NaN	1.24102	0.830576	0.0173943	0.00110291	0.163742	0.865121	0.0201062	0.0688171	0.0160267	1.00911	1.22982	0.999189	0.83125	0.389581	0.420304
NDX	22	22C 8WT10	75	65	2	8WT10222NDX	005FP2	1.87738	1.895	1.87672	1.73259	1.86768	4.89e-08	9.33e-08	2.04e-08	2.17e-09	7.33e-09	6.62e-08	NaN	0.737897	1.40894	0.30813	0.0327364	0.110658	0.850419	0.362327	0.142996	0.228932	1.08724	0.678688	0.937791	1.50241	0.424808	0.260488
NDX	22	22C 8WT10	75	65	1	8WT10221NDX	005FP3	1.86287	1.89244	1.86343	1.73985	1.84872	4.78e-07	3.98e-07	1.59e-07	3.23e-08	1.06e-07	4.36e-07	NaN	1.0969	0.913581	0.365608	0.0740961	0.243096	0.90024	0.406123	0.110318	0.671657	1.19392	0.91874	0.864443	1.05684	0.476702	0.509953
NDX	22	22C 8WT10	75	65	3	8WT10223NDX	006FP1	1.87535	1.8943	1.86145	1.71724	1.85957	3.2e-07	1.67e-07	5.82e-08	1.15e-08	2.54e-08	2.26e-07	NaN	1.41359	0.735875	0.257183	0.0506018	0.112173	1.07759	0.238665	0.164461	0.307683	1.2976	1.08939	0.810554	0.907868	0.573216	0.19569
NDX	1	3	23	23	1	131NDX	001FP3	1.88776	1.90249	1.88946	1.76783	1.87991	5.07e-07	3.87e-07	5.99e-07	3.18e-08	4.62e-08	4.32e-07	NaN	1.17503	0.895796	1.3871	0.0736571	0.106883	0.906749	1.52975	0.0776456	0.948633	1.09732	1.07082	0.95644	0.936594	0.455825	0.234482
NDX	2	3	23	23	1	231NDX	002FP1	1.87608	1.89537	1.88205	1.72199	1.8543	3.37e-07	3.56e-07	5.32e-07	7.73e-08	3.28e-08	3.45e-07	NaN	0.976391	1.03287	1.54452	0.224284	0.0950087	0.75207	2.05369	0.1661	1.3503	1.07309	0.909888	0.946048	1.09177	0.564559	0.168288
NDX	3	3	23	23	1	331NDX	002FP1	1.87608	1.89537	1.88205	1.72199	1.8543	1.78e-07	2.69e-07	2.5e-07	6.52e-08	2.45e-08	2.17e-07	NaN	0.819274	1.23886	1.1534	0.300692	0.113023	0.75207	1.53364	0.1661	1.81031	1.07309	0.763473	0.946048	1.30951	0.564559	0.200197
NDX	3	3	23	23	2	332NDX	009FP2	1.86867	1.88053	1.87899	1.73996	1.85198	1.19e-08	1.13e-08	2.02e-08	2.54e-09	1.99e-09	1.15e-08	Bad UBC	1.04032	0.983372	1.75778	0.221634	0.173207	0.70459	2.49476	0.0982326	2.25622	1.01537	1.02456	1.02179	0.962401	0.432925	0.400085
NDX	1	3	23	23	2	132NDX	011FP2	1.88374	1.88426	1.87076	1.72274	1.86785	7.32e-07	6.34e-07	5.83e-07	1.11e-07	4.65e-08	6.65e-07	NaN	1.10139	0.954279	0.8775	0.166434	0.069976	0.937812	0.935688	0.148047	1.1242	1.08108	1.01879	0.96236	0.991603	0.411209	0.170172
NDX	2	3	23	23	2	232NDX	012FP2	1.88245	1.87766	1.86989	1.71715	1.85858	1.06e-06	2.95e-07	8.4e-07	1.21e-07	5.93e-08	5.54e-07	NaN	1.90819	0.532838	1.5178	0.218705	0.10711	0.81933	1.85249	0.130602	1.67459	0.892982	2.13687	1.13319	0.470209	0.43295	0.247396
NDX	8	8C 13WT10	90	100	1	13WT1081NDX	010FP3	1.88543	1.88372	1.85925	1.72716	1.86435	2.42e-07	3.03e-06	1.01e-07	6.55e-09	3.03e-06	8.46e-07	NaN	0.285843	3.57901	0.119555	0.00774163	3.58504	1.19145	0.100344	0.168392	0.0459738	0.997579	0.286537	1.08388	3.30204	0.54746	6.5485
NDX	8	8C 13WT10	90	100	2	13WT1082NDX	011FP3	1.88881	1.88016	1.85109	1.72167	1.88629	3.07e-06	6.36e-06	9.52e-08	1.5e-08	2.51e-06	4.41e-06	NaN	0.695219	1.43991	0.0215634	0.00339468	0.569346	1.26525	0.0170427	0.146125	0.0232313	1.02585	0.677698	1.00505	1.43267	0.359094	1.58551
NDX	8	8C 13WT10	90	100	3	13WT1083NDX	012FP3	1.8895	1.90192	1.85731	1.72452	1.89094	1.49e-06	1.19e-06	3.01e-08	3.95e-09	8.99e-07	1.29e-06	NaN	1.15556	0.92382	0.0234139	0.00307381	0.698939	1.17866	0.0198648	0.176063	0.0174586	1.0656	1.08443	0.963561	0.958756	0.358734	1.94835
NDX	8	8C 8WT10	55	65	1	G11	003 007 FP3	1.5135	1.2735	1.3425	1.452	1.524	NaN	1.89e-07	1.9e-08	1.66e-09	1.62e-07	NaN	NaN	NaN	NaN	NaN	NaN	NaN	1.12769	NaN	0.261795	NaN	1.31456	NaN	0.76071	NaN	0.481903	NaN
NDX	8	8C 8WT10	55	65	3	8WT1083NDX	009FP3	1.87988	1.88296	1.87016	1.71813	1.87523	1.88e-07	1.57e-07	4.26e-08	6.38e-09	2.87e-07	1.71e-07	NaN	1.10132	0.919033	0.249985	0.0373931	1.6829	0.972884	0.256953	0.13649	0.273962	0.935877	1.17678	1.08637	0.845967	0.321839	5.22902
NIL1	1	1	9	9	1	111NIL1	006FP2	1.88265	1.89284	1.87491	1.75695	1.87568	8.1e-09	2.67e-08	4.28e-08	6.1e-09	5.51e-10	1.44e-08	Bad UBC	0.563132	1.85813	2.97836	0.424176	0.0383546	0.865121	3.4427	0.0688171	6.16383	1.00911	0.55805	0.999189	1.85964	0.389581	0.0984509
NIL1	1	1	9	9	2	112NIL1	009FP1	1.868	1.8849	1.87638	1.74067	1.84771	4.52e-08	5.51e-08	1.08e-07	1.81e-08	1.54e-09	4.96e-08	NaN	0.911448	1.10904	2.18426	0.364183	0.0310357	0.841732	2.59496	0.0920425	3.95669	1.08201	0.842362	0.963693	1.15083	0.507846	0.0611126
NIL1	2	1	9	9	2	212NIL1	010FP1	1.8647	1.8809	1.87955	1.72822	1.85484	1.25e-07	6.13e-08	2.36e-07	6.18e-08	8.36e-10	8.69e-08	NaN	1.43414	0.705653	2.71839	0.712001	0.009624	0.714524	3.80448	0.110966	6.41638	1.045	1.37238	1.0011	0.704876	0.484065	0.0198816
NIL1	3	1	9	9	2	312NIL1	011FP1	1.875	1.88906	1.8814	1.72278	1.84935	1.34e-08	2.1e-08	3.56e-08	1.87e-08	3.18e-11	1.67e-08	Bad UBC	0.803249	1.26142	2.13536	1.12097	0.00190427	0.780389	2.73627	0.143972	7.78598	1.28092	0.627089	0.830475	1.51891	0.596948	0.00319001
NIL1	1	2	16	16	1	121NIL1	001FP1	1.86774	1.90213	1.87451	1.71119	1.84445	3.22e-07	2.5e-07	9.42e-07	1.28e-07	3.1e-09	2.78e-07	NaN	1.15898	0.898913	3.39311	0.461399	0.011167	0.880708	3.8527	0.192921	2.39165	1.13909	1.01747	0.889496	1.01059	0.67031	0.0166594
NIL1	2	2	16	16	1	221NIL1	001FP2	1.86641	1.8869	1.86963	1.74128	1.85735	1.36e-08	3.75e-08	7.05e-08	1.39e-08	1.45e-09	2.24e-08	NaN	0.605325	1.67375	3.14362	0.621438	0.0647951	0.82159	3.82626	0.0913827	6.80039	1.17879	0.513516	0.907243	1.84487	0.492102	0.13167
NIL1	3	2	16	16	1	321NIL1	001FP2	1.86641	1.8869	1.86963	1.74128	1.85735	3.74e-07	3.01e-07	7.25e-07	4.77e-08	9.72e-10	3.35e-07	NaN	1.11656	0.89893	2.16466	0.142562	0.00290293	0.82159	2.63472	0.0913827	1.56005	1.17879	0.947211	0.907243	0.990837	0.492102	0.00589902
NIL1	2	2	16	16	2	222NIL1	009FP2	1.86867	1.88053	1.87899	1.73996	1.85198	5.48e-07	1.51e-07	4.2e-07	9.65e-08	2.83e-09	2.85e-07	NaN	1.92432	0.529301	1.47623	0.339092	0.00993841	0.70459	2.09516	0.0982326	3.45193	1.01537	1.89519	1.02179	0.518013	0.432925	0.0229564
NIL1	3	2	16	16	2	322NIL1	010FP2	1.87255	1.89381	1.86992	1.73219	1.84777	5.69e-07	2.12e-07	5.8e-07	1.63e-07	1.72e-09	3.47e-07	NaN	1.64128	0.612402	1.67259	0.471127	0.00496101	1.44712	1.15581	0.202229	2.32967	1.71879	0.954905	0.645878	0.948168	0.919584	0.00539483
NIL1	1	2	16	16	2	122NIL1	012FP1	1.88099	1.89659	1.87632	1.72076	1.85176	6.21e-07	1.69e-07	7.41e-07	2.35e-07	1.59e-09	3.19e-07	NaN	1.94582	0.529349	2.32385	0.735641	0.00498395	0.784247	2.96316	0.146598	5.01808	1.05045	1.85237	0.966884	0.547479	0.531422	0.00937851
NIL1	1	5	37	37	1	151NIL1	002FP2	1.87118	1.89254	1.89011	1.72422	1.87263	2.11e-07	1.38e-07	2.93e-07	3.24e-08	2.74e-08	1.66e-07	NaN	1.26831	0.826923	1.76204	0.19454	0.164672	0.715707	2.46195	0.162288	1.19873	1.26694	1.00108	0.833998	0.991517	0.456103	0.361042
NIL1	3	5	37	37	1	251NIL1	002FP3	1.88057	1.90335	1.89829	1.7732	1.88871	3.74e-07	2.73e-07	5.4e-07	4.5e-08	2.21e-08	3.13e-07	NaN	1.19296	0.870419	1.72216	0.143557	0.0703767	0.69207	2.48842	0.0619552	2.31712	1.04029	1.14676	0.981386	0.886929	0.33273	0.211513
NIL1	2	5	37	37	1	F1	003 007 FP1	1.87329	1.89506	1.87916	1.73378	1.87786	5.89e-09	8.91e-09	4.22e-09	1.35e-09	8.86e-10	7.25e-09	Bad UBC	0.813206	1.2297	0.582026	0.18671	0.122256	0.982724	0.592259	0.181607	1.0281	1.17757	0.690581	0.849207	1.44806	0.514649	0.237552
NIL1	1	5	37	37	2	152NIL1	010FP2	1.87255	1.89381	1.86992	1.73219	1.84777	1.68e-06	1e-06	3.59e-06	2.91e-07	7.85e-08	1.29e-06	NaN	1.29891	0.776056	2.78664	0.225362	0.060829	1.44712	1.92565	0.202229	1.11439	1.71879	0.755715	0.645878	1.20155	0.919584	0.0661484
NIL1	3	5	37	37	2	252NIL1	011FP2	1.88374	1.88426	1.87076	1.72274	1.86785	2.19e-07	3.9e-07	3.98e-07	7.11e-08	1.7e-08	2.9e-07	NaN	0.755886	1.34569	1.37405	0.245539	0.0586398	0.937812	1.46517	0.148047	1.65852	1.08108	0.699197	0.96236	1.39832	0.411209	0.142603
NIL1	2	5	37	37	2	352NIL1	012FP3	1.8895	1.90192	1.85731	1.72452	1.89094	4.7e-07	3.01e-07	2.12e-06	1.8e-07	1.22e-08	3.72e-07	NaN	1.26458	0.810346	5.70231	0.484145	0.0328392	1.17866	4.83795	0.176063	2.74985	1.0656	1.18673	0.963561	0.84099	0.358734	0.091542
NIL1	2	7	51	51	1	H4	003 007 FP1	1.87329	1.89506	1.87916	1.73378	1.87786	4.19e-07	3.68e-07	2.35e-07	2.74e-08	2.99e-08	3.93e-07	NaN	1.06595	0.938133	0.597196	0.0697532	0.0761485	0.982724	0.607694	0.181607	0.384089	1.17757	0.90521	0.849207	1.10472	0.514649	0.147962
NIL1	3	7	51	51	2	372NIL1	016FP7	1.89644	1.88728	1.89109	1.70604	1.89299	1.36e-06	9.45e-07	9.47e-07	1.89e-07	6.05e-08	1.11e-06	NaN	1.22919	0.85153	0.854043	0.170089	0.0545037	0.661754	1.29057	0.145177	1.1716	0.87103	1.41119	1.21042	0.703499	0.287181	0.189789
NIL1	1	7	51	51	2	172NIL1	019FP7	1.88187	1.90044	1.90038	1.72628	1.91807	2.59e-06	6.43e-07	1.61e-06	2.03e-07	1.4e-07	1.27e-06	NaN	2.03173	0.504376	1.25982	0.159519	0.109912	0.825716	1.52573	0.149663	1.06586	1.12108	1.8123	0.894724	0.563722	0.286746	0.383308
NIL1	2	7	51	51	2	272NIL1	020FP2	1.90785	1.89962	1.88201	1.68971	1.90013	1.75e-07	1.68e-07	2.69e-07	4.01e-08	1.66e-08	1.7e-07	NaN	1.03007	0.989939	1.58475	0.236151	0.0980991	1.25034	1.26746	0.3489	0.676844	0.987811	1.04279	1.02211	0.968528	0.418299	0.234519
NIL1	1	9	65	65	1	191NIL1	004FP1	1.86813	1.89054	1.87135	NaN	1.87385	1.07e-08	8.81e-09	1.5e-08	NaN	1.71e-08	9.56e-09	Bad UBC	1.1146	0.921898	1.57398	NaN	1.79277	0.876494	NaN	NaN	NaN	NaN	NaN	NaN	NaN	NaN	NaN
NIL1	2	9	65	65	1	291NIL1	004FP1	1.86813	1.89054	1.87135	1.70021	1.87385	3.28e-07	3.43e-07	2.24e-07	3.51e-08	1.95e-07	3.19e-07	NaN	1.02921	1.0758	0.701898	0.110177	0.612111	0.876494	0.800802	0.227034	0.485288	1.11778	0.920768	0.921858	1.16699	0.389836	1.57018
NIL1	3	9	65	65	1	391NIL1	004FP2	1.87305	1.89591	1.87559	1.74662	1.87864	8e-07	4.39e-07	6.15e-07	3.25e-08	4.66e-07	5.82e-07	NaN	1.37514	0.753924	1.05672	0.0558063	0.800647	1.28987	0.819244	0.0723901	0.77091	1.02024	1.34786	0.833748	0.904259	0.240781	3.32521
NIL1	1	9	65	65	2	192NIL1	013FP1	1.89261	1.89846	1.88809	1.69849	1.89229	4.77e-07	7.59e-07	3.73e-07	4.49e-08	4.43e-07	5.94e-07	NaN	0.802839	1.27779	0.627116	0.0755369	0.745288	1.31204	0.477972	0.362568	0.208339	1.60658	0.499718	0.981732	1.30157	0.553116	1.34744
NIL1	3	9	65	65	2	392NIL1	014FP7	1.88408	1.91267	1.90425	1.70712	1.89464	2.61e-07	1.99e-07	4.89e-07	4.91e-08	2.59e-07	2.26e-07	NaN	1.15182	0.877522	2.16224	0.217228	1.14322	0.861562	2.50967	0.237721	0.913795	1.19512	0.963769	0.839336	1.0455	0.436104	2.62144
NIL1	2	9	65	65	2	292NIL1	015FP2	1.90353	1.89417	1.87892	1.71913	1.89298	6.79e-07	5.78e-07	9.24e-07	1.34e-07	2.63e-07	6.21e-07	NaN	1.09338	0.93001	1.48802	0.216039	0.423336	1.04908	1.41841	0.205684	1.05034	1.0516	1.03974	0.968382	0.960375	0.366226	1.15594
NIL1	1	11	79	79	1	1111NIL1	006FP3	1.87135	1.88785	1.86674	1.72318	1.88094	1.54e-07	1.9e-07	4.24e-08	5.2e-09	9.97e-08	1.7e-07	NaN	0.906587	1.12074	0.24987	0.0306278	0.587199	2.43184	0.10275	0.367617	0.0833144	3.40765	0.266045	1.5644	0.716405	1.03782	0.565798
NIL1	3	11	79	79	2	3112NIL1	014FP4	1.87992	1.91971	1.87856	1.70837	1.88699	1.46e-06	8.41e-07	4.19e-07	4.4e-08	4.16e-07	1.08e-06	NaN	1.35489	0.779733	0.388453	0.0407992	0.386368	1.09719	0.354044	0.241073	0.16924	1.21167	1.11821	0.869193	0.897077	0.360863	1.07068
NIL1	2	11	79	79	2	2112NIL1	015FP3	1.89281	1.89762	1.89592	1.71722	1.92113	5.66e-07	3.75e-07	1.44e-07	1.19e-08	1.51e-07	4.55e-07	NaN	1.24594	0.825517	0.316052	0.0262552	0.33196	0.898213	0.351867	0.195903	0.134021	1.17831	1.05739	0.874314	0.944188	0.28899	1.14869
NIL1	3	14	114	114	2	3142NIL1	015FP2	1.90353	1.89417	1.87892	1.71913	1.89298	5.58e-07	1.1e-06	8.76e-08	2.16e-09	6.31e-07	7.65e-07	NaN	0.729333	1.43175	0.114492	0.00282088	0.825263	1.04908	0.109136	0.205684	0.0137147	1.0516	0.693547	0.968382	1.4785	0.366226	2.25343
NIL1	1	14	114	114	1	1141NIL1	016FP6	1.8662	1.90549	1.89735	1.72908	1.88794	9.72e-07	7.08e-07	1.47e-08	6.75e-10	4.81e-07	8.1e-07	NaN	1.1997	0.873369	0.0181826	0.000833152	0.593969	0.773496	0.023507	0.122447	0.00680417	1.33059	0.901631	0.748278	1.16717	0.401535	1.47924
NIL1	2	14	114	114	1	2141NIL1	017FP2	1.88289	1.8966	1.87626	1.68928	1.90023	2.05e-07	2.88e-07	1.8e-08	3.35e-09	3.46e-07	2.4e-07	NaN	0.855663	1.20106	0.0750099	0.0139395	1.4392	1.07709	0.0696415	0.291836	0.0477647	1.1308	0.756688	0.896035	1.34042	0.346238	4.15668
NIL1	3	14	114	114	1	3141NIL1	018FP1	1.87818	1.88808	1.8758	1.73444	1.88665	6.22e-07	4.86e-07	2.98e-08	1.19e-09	6.95e-07	5.4e-07	NaN	1.15119	0.899095	0.0551774	0.00220521	1.2872	0.884537	0.06238	0.115537	0.0190866	1.0584	1.08766	0.897426	1.00186	0.344665	3.73465
NIL1	1	14	114	114	2	1142NIL1	019FP3	1.89621	1.89562	1.88374	1.70489	1.9038	8.37e-07	6.79e-07	1.99e-08	1.15e-09	4.82e-07	7.46e-07	NaN	1.12111	0.910051	0.0266415	0.00154159	0.646087	1.05274	0.0253068	0.249768	0.00617211	1.07757	1.0404	0.937987	0.970217	0.358514	1.80213
NIL1	2	14	114	114	2	2142NIL1	020FP2	1.90785	1.89962	1.88201	1.68971	1.90013	2.41e-07	3.66e-07	1.66e-08	2.64e-09	2.95e-07	2.94e-07	NaN	0.820519	1.24532	0.0563234	0.00897595	1.00532	1.25034	0.0450466	0.3489	0.0257264	0.987811	0.830644	1.02211	1.21838	0.418299	2.40336
NIL1	2	15	128	128	1	2151NIL1	014FP1	1.89092	1.8987	1.87583	1.68581	1.89428	1.69e-06	5.89e-07	9.08e-09	1.06e-09	1.03e-06	9.57e-07	NaN	1.76202	0.615497	0.00948697	0.00110919	1.08091	1.19098	0.00796571	0.405493	0.00273542	1.29674	1.3588	0.844208	0.729082	0.417674	2.58794
NIL1	3	15	128	128	1	3151NIL1	015FP1	1.88579	1.88749	1.87612	1.70145	1.88913	1.28e-06	8.09e-07	6.96e-09	1.53e-09	1.02e-06	1.01e-06	NaN	1.26225	0.800541	0.0068879	0.00151638	1.01319	1.15935	0.00594115	0.301099	0.00503616	1.24228	1.01608	0.860931	0.929856	0.463419	2.18633
NIL1	2	15	128	128	2	2152NIL1	017FP3	1.87941	1.89809	1.85559	NaN	1.89286	2.2e-07	2.25e-07	3.61e-09	NaN	1.63e-07	2.19e-07	Missing values	1.00198	1.02478	0.016476	NaN	0.74109	1.42603	0.0115538	0.239244	NaN	1.16481	0.860214	0.874626	1.17167	0.398456	1.85991
NIL1	3	15	128	128	2	3152NIL1	018FP7	1.8863	1.89323	1.88903	1.71439	1.89462	2.24e-07	2.39e-07	4.36e-09	1.6e-09	2.58e-07	2.28e-07	NaN	0.983665	1.05157	0.0191642	0.0070359	1.1348	0.943137	0.0203196	0.184797	0.0380736	1.03835	0.947338	0.965986	1.08859	0.390366	2.90701
NIL1	1	15	128	128	2	1152NIL1	020FP3	1.8778	1.90697	1.86206	1.71413	1.91182	1.55e-06	9.77e-07	3.17e-08	3.09e-09	9.61e-07	1.21e-06	NaN	1.28369	0.809728	0.0262765	0.00256208	0.795918	1.48009	0.0177533	0.190239	0.0134678	1.2726	1.00872	0.79661	1.01647	0.297273	2.6774
NIL1	1	13	100	100	1	1131NIL1	004FP3	1.87999	1.89718	1.86015	1.72219	1.88538	4.61e-06	3.91e-06	1.24e-06	7.72e-08	2.98e-06	4.15e-06	NaN	1.11156	0.943522	0.298252	0.0186239	0.719712	1.28987	0.231225	0.179254	0.103897	1.25463	0.88597	0.833748	1.13166	0.413129	1.7421
NIL1	2	13	100	100	1	2131NIL1	005FP1	1.87074	1.88866	1.86393	1.73025	1.87136	5.31e-07	5.9e-07	1.54e-07	6.81e-09	8.65e-07	5.56e-07	NaN	0.95472	1.06143	0.277164	0.0122402	1.55504	0.87872	0.315418	0.123899	0.0987921	0.989991	0.964373	1.01214	1.04869	0.335857	4.63007
NIL1	3	13	100	100	1	3131NIL1	005FP2	1.87738	1.895	1.87672	1.73259	1.86768	1.02e-06	1.2e-06	2.06e-07	1.53e-08	2.04e-06	1.1e-06	NaN	0.929555	1.09625	0.188269	0.0139394	1.8614	0.850419	0.221384	0.142996	0.0974806	1.08724	0.854968	0.937791	1.16897	0.424808	4.38175
NIL1	2	13	100	100	2	2132NIL1	017FP2	1.88289	1.8966	1.87626	1.68928	1.90023	3.07e-07	2.83e-07	5.47e-08	1.51e-09	2.64e-07	2.93e-07	NaN	1.04671	0.96674	0.186489	0.00516123	0.899839	1.07709	0.173142	0.291836	0.0176854	1.1308	0.925634	0.896035	1.07891	0.346238	2.5989
NIL1	3	13	100	100	2	3132NIL1	018FP1	1.87818	1.88808	1.8758	1.73444	1.88665	8.26e-07	6.24e-07	1.27e-07	2.15e-09	6.63e-07	7.05e-07	NaN	1.17094	0.885126	0.180165	0.00304817	0.940735	0.884537	0.203683	0.115537	0.0263826	1.0584	1.10633	0.897426	0.986295	0.344665	2.72942
NIL1	1	13	100	100	2	1132NIL1	019FP3	1.89621	1.89562	1.88374	1.70489	1.9038	2.51e-07	3.05e-07	4.93e-08	5.87e-09	3.03e-07	2.72e-07	NaN	0.920239	1.12029	0.180862	0.0215343	1.11152	1.05274	0.171801	0.249768	0.0862172	1.07757	0.853993	0.937987	1.19436	0.358514	3.10035
NIL1	2	17	156	156	1	2171 NIL1	T17 FP1	1.87875	1.87217	1.86863	1.69041	1.87207	2.5e-06	1.65e-06	1.43e-08	5.44e-09	6.6e-07	2.03e-06	NaN	1.23117	0.812237	0.00702767	0.00267856	0.324856	1.15354	0.00609229	0.232756	0.0115081	1.0991	1.12016	0.909836	0.892729	0.455106	0.713803
NIL1	3	17	156	156	1	3171 NIL1	T17 FP3	1.87141	1.85894	1.87842	1.70743	1.8995	1.43e-06	7.25e-07	1.29e-09	8.96e-10	1.87e-07	1.02e-06	NaN	1.4024	0.713064	0.00126366	0.000880812	0.183518	0.995003	0.00127001	0.154747	0.00569194	1.11643	1.25615	0.895712	0.796086	0.26627	0.689219
NIL1	1	17	156	156	2	1172 NIL1	T17 FP3	1.87141	1.85894	1.87842	1.70743	1.8995	1.53e-06	7.38e-07	1.67e-09	NaN	2.55e-07	1.06e-06	NaN	1.44135	0.693793	0.00157348	NaN	0.239711	0.995003	0.00158139	0.154747	NaN	1.11643	1.29104	0.895712	0.774571	0.26627	0.900257
NIL1	2	17	156	156	2	2172 NIL1	T17 FP4	1.88299	1.87427	1.85002	1.70246	1.88145	9.18e-07	8.23e-08	2.22e-10	NaN	1.47e-07	2.75e-07	NaN	3.34051	0.299355	0.000806461	NaN	0.533862	1.50587	0.000535545	0.211762	NaN	1.01314	3.2972	0.987035	0.303288	0.357668	1.49262
NIL1	3	17	156	156	2	3172 NIL1	T17 FP5	1.8793	1.89836	1.8706	1.69511	1.88532	2.85e-07	1.99e-07	7.44e-10	7.07e-10	7.82e-08	2.39e-07	NaN	1.1959	0.836191	0.00311814	0.0029614	0.327744	0.856659	0.00363989	0.208815	0.014182	1.02319	1.1688	0.977339	0.855579	0.261137	1.25507
NIL1	22	22C 13WT10	110	100	2	F8	003 007 FP2	2.123	2.1085	2.249	1.432	2.421	2.86e-08	7.04e-08	1.75e-09	NaN	1.19e-09	4.49e-08	NaN	0.637494	1.56864	0.0390841	NaN	0.026533	0.892497	0.0437919	0.051175	NaN	1.01475	0.62823	0.985468	1.59177	0.362457	0.0732032
NIL1	22	22C 13WT10	110	100	1	13WT10221NIL1	006FP2	1.88265	1.89284	1.87491	1.75695	1.87568	6.4e-07	6.14e-07	3.57e-08	2.6e-09	4.07e-08	6.09e-07	NaN	1.05102	1.00886	0.0586257	0.00426742	0.0668455	0.865121	0.0677659	0.0688171	0.062011	1.00911	1.04154	0.999189	1.00967	0.389581	0.171583
NIL1	22	22C 8WT10	75	65	2	8WT10222NIL1	005FP2	1.87738	1.895	1.87672	1.73259	1.86768	1.73e-07	2e-07	1.94e-07	2.17e-08	4.18e-09	1.84e-07	NaN	0.94038	1.08873	1.05645	0.118121	0.0227054	0.850419	1.24227	0.142996	0.826043	1.08724	0.864925	0.937791	1.16095	0.424808	0.0534486
NIL1	22	22C 8WT10	75	65	1	8WT10221NIL1	005FP3	1.86287	1.89244	1.86343	1.73985	1.84872	1.31e-06	8.85e-07	3.61e-08	3.02e-09	5.78e-09	1.05e-06	NaN	1.24499	0.842164	0.0343492	0.00287162	0.00549825	0.90024	0.0381556	0.110318	0.0260303	1.19392	1.04278	0.864443	0.974228	0.476702	0.0115339
NIL1	22	22C 8WT10	75	65	3	8WT10223NIL1	006FP1	1.87535	1.8943	1.86145	1.71724	1.85957	1.4e-07	4.88e-08	1.13e-07	5.6e-09	1.98e-09	7.42e-08	Bad UBC	1.89281	0.65777	1.51936	0.0754394	0.0267296	1.07759	1.40996	0.164461	0.458708	1.2976	1.45871	0.810554	0.811507	0.573216	0.0466309
NIL1	22	22C 8WT35	100	65	2	8WT3522CNIL12	016FP1	1.86993	1.90488	1.87282	NaN	1.88073	2.72e-09	2.43e-09	2.99e-09	NaN	5.73e-09	2.52e-09	Bad UBC	1.08198	0.966056	1.18889	NaN	2.27879	0.841387	NaN	NaN	NaN	NaN	NaN	NaN	NaN	NaN	NaN
NIL1	22	22C 8WT35	100	65	3	8WT3522CNIL13	016FP1	1.86993	1.90488	1.87282	1.61217	NaN	2.94e-09	4.51e-09	7.5e-09	1.52e-08	NaN	3.58e-09	Bad UBC	0.821063	1.26215	2.09865	4.25138	NaN	0.841387	NaN	NaN	NaN	NaN	NaN	NaN	NaN	NaN	NaN
NIL1	1	3	23	23	1	131NIL1	001FP3	1.88776	1.90249	1.88946	1.76783	1.87991	8.65e-07	5.39e-07	1.33e-06	4.74e-08	5.45e-09	6.64e-07	NaN	1.30162	0.811279	2.00978	0.0714115	0.00820719	0.906749	2.21647	0.0776456	0.919711	1.09732	1.18618	0.95644	0.848228	0.455825	0.0180051
NIL1	2	3	23	23	1	231NIL1	002FP1	1.87608	1.89537	1.88205	1.72199	1.8543	2.07e-07	1.83e-07	5.43e-07	7.16e-08	2.47e-09	1.92e-07	NaN	1.081	0.953783	2.83704	0.373698	0.0129045	0.75207	3.7723	0.1661	2.24984	1.07309	1.00737	0.946048	1.00818	0.564559	0.0228577
NIL1	3	3	23	23	1	331NIL1	002FP1	1.87608	1.89537	1.88205	1.72199	1.8543	7.96e-07	7.22e-07	1.6e-06	2.71e-07	5.32e-09	7.42e-07	NaN	1.07294	0.973301	2.16372	0.364702	0.00717654	0.75207	2.87702	0.1661	2.19567	1.07309	0.999857	0.946048	1.02881	0.564559	0.0127118
NIL1	3	3	23	23	2	332NIL1	009FP2	1.86867	1.88053	1.87899	1.73996	1.85198	5.41e-07	3.47e-07	8.64e-07	9.56e-08	2.78e-09	4.27e-07	NaN	1.2649	0.812755	2.02062	0.223736	0.00649598	0.70459	2.8678	0.0982326	2.27762	1.01537	1.24575	1.02179	0.795422	0.432925	0.0150048
NIL1	1	3	23	23	2	132NIL1	011FP2	1.88374	1.88426	1.87076	1.72274	1.86785	6.44e-07	6.76e-07	5.98e-07	9.07e-08	4.03e-09	6.51e-07	NaN	0.988984	1.03867	0.919446	0.139342	0.00618645	0.937812	0.980416	0.148047	0.941201	1.08108	0.914813	0.96236	1.07929	0.411209	0.0150446
NIL1	2	3	23	23	2	232NIL1	012FP2	1.88245	1.87766	1.86989	1.71715	1.85858	3.03e-08	1.27e-08	4.83e-08	8.64e-09	2.31e-10	1.93e-08	Bad UBC	1.57057	0.659941	2.50552	0.447892	0.0119943	0.81933	3.05801	0.130602	3.42944	0.892982	1.75879	1.13319	0.582373	0.43295	0.0277036
NIL1	8	8C 13WT10	90	100	1	13WT1081NIL1	010FP3	1.88543	1.88372	1.85925	1.72716	1.86435	8.19e-07	6.83e-07	5.48e-07	5.32e-08	2.11e-09	7.44e-07	NaN	1.10138	0.917979	0.737445	0.0715051	0.00283545	1.19145	0.618948	0.168392	0.424635	0.997579	1.10405	1.08388	0.846939	0.54746	0.00517929
NIL1	8	8C 13WT10	90	100	2	13WT1082NIL1	011FP3	1.88881	1.88016	1.85109	1.72167	1.88629	2.58e-06	4.02e-06	1.88e-07	8.71e-09	1.43e-06	3.2e-06	NaN	0.806802	1.25845	0.0589517	0.00272465	0.447531	1.26525	0.0465928	0.146125	0.018646	1.02585	0.78647	1.00505	1.25212	0.359094	1.24628
NIL1	8	8C 13WT10	90	100	3	13WT1083NIL1	012FP3	1.8895	1.90192	1.85731	1.72452	1.89094	2.03e-06	1.35e-06	1.19e-07	6.79e-09	1.84e-06	1.651e-06	NaN	1.2314	0.817002	0.0723573	0.00411039	1.11233	1.17866	0.0613893	0.176063	0.0233462	1.0656	1.1556	0.963561	0.847898	0.358734	3.1007
NIL1	8	8C 8WT10	55	65	1	B10	003 007 FP3	1.5135	1.2735	1.3425	1.452	1.524	3.22e-07	2.65e-07	1.58e-07	3.38e-08	2.32e-07	2.92e-07	NaN	1.10228	0.907211	0.541279	0.115761	0.793406	1.12769	0.479991	0.261795	0.442183	1.31456	0.838515	0.76071	1.19258	0.481903	1.6464
NIL1	8	8C 8WT10	55	65	2	C7	007 008 FP4	1.766	2.023	2.023	1.205	2.5	9.69e-07	5.55e-07	1.37e-07	1.49e-08	6.59e-07	7.33e-07	NaN	1.3211	0.756942	0.186273	0.0202583	0.898381	0.915093	0.203556	0.0815395	0.248448	0.901006	1.46625	1.10987	0.68201	0.46306	1.9401
NIL1	8	8C 8WT10	55	65	3	8WT1083NIL1	009FP3	1.87988	1.88296	1.87016	1.71813	1.87523	4.98e-07	2.9e-07	1.6e-07	2.39e-08	3.48e-07	3.77e-07	NaN	1.32143	0.769792	0.423798	0.0633778	0.923256	0.972884	0.43561	0.13649	0.46434	0.935877	1.41197	1.08637	0.708592	0.321839	2.86869
NIL2	1	1	9	9	1	111NIL2	006FP2	1.88265	1.89284	1.87491	1.75695	NaN	1.47e-08	6.08e-08	1.03e-07	1.28e-08	NaN	2.98e-08	Missing values	0.492518	2.04353	3.46532	0.431388	NaN	0.865121	4.00559	0.0688171	6.26862	1.00911	0.488073	0.999189	2.04519	0.389581	NaN
NIL2	3	1	9	9	1	H5	007 008 FP2	2.123	2.1085	2.249	1.432	2.421	4.97e-09	1.69e-08	9.83e-09	1.18e-09	4.94e-11	9.16e-09	Bad UBC	0.542318	1.84394	1.07302	0.128842	0.00539786	0.892497	1.20226	0.051175	2.51767	1.01475	0.534437	0.985468	1.87113	0.362457	0.0148924
NIL2	1	1	9	9	2	112NIL2	009FP1	1.868	1.8849	1.87638	1.74067	1.84771	3.31e-08	6.34e-08	1.49e-07	3.23e-08	1.49e-09	4.53e-08	NaN	0.731061	1.39923	3.28029	0.712954	0.0328386	0.841732	3.89706	0.0920425	7.74592	1.08201	0.675648	0.963693	1.45195	0.507846	0.0646626
NIL2	2	1	9	9	2	212NIL2	010FP1	1.8647	1.8809	1.87955	1.72822	1.85484	1.9e-07	9.83e-08	3.36e-07	8.57e-08	1.26e-09	1.36e-07	NaN	1.39998	0.725686	2.47606	0.632561	0.00931916	0.714524	3.46532	0.110966	5.70049	1.045	1.33969	1.0011	0.724886	0.484065	0.0192519
NIL2	3	1	9	9	2	312NIL2	011FP1	1.875	1.88906	1.8814	1.72278	1.84935	2.76e-08	6.9e-08	1.3e-07	4.71e-08	2.95e-10	4.27e-08	NaN	0.647792	1.61815	3.04076	1.10476	0.00692425	0.780389	3.89646	0.143972	7.67342	1.28092	0.505725	0.830475	1.94847	0.596948	0.0115994
NIL2	1	2	16	16	1	121NIL2	001FP1	1.86774	1.90213	1.87451	1.71119	1.84445	6.18e-07	2.99e-07	1.01e-06	1.88e-07	3.5e-09	4.28e-07	NaN	1.44563	0.699046	2.36047	0.440129	0.00819414	0.880708	2.6802	0.192921	2.28139	1.13909	1.26911	0.889496	0.78589	0.67031	0.0122244
NIL2	2	2	16	16	1	221NIL2	001FP2	1.86641	1.8869	1.86963	1.74128	1.85735	7.81e-07	2.37e-07	8.37e-07	8.2e-08	1.26e-09	4.27e-07	NaN	1.82699	0.554412	1.95846	0.191998	0.00295217	0.82159	2.38374	0.0913827	2.10104	1.17879	1.54989	0.907243	0.611095	0.492102	0.0059991
NIL2	3	2	16	16	1	321NIL2	001FP2	1.86641	1.8869	1.86963	1.74128	1.85735	5.07e-07	4.22e-07	7e-07	1.03e-07	1.53e-09	4.57e-07	NaN	1.10935	0.924303	1.53199	0.224328	0.00334278	0.82159	1.86466	0.0913827	2.45482	1.17879	0.941096	0.907243	1.0188	0.492102	0.00679285
NIL2	2	2	16	16	2	222NIL2	009FP2	1.86867	1.88053	1.87899	1.73996	1.85198	6.24e-07	1.61e-07	4.74e-07	9.18e-08	2.65e-09	3.15e-07	NaN	1.97873	0.509461	1.50317	0.29115	0.00841791	0.70459	2.1334	0.0982326	2.96389	1.01537	1.94877	1.02179	0.498596	0.432925	0.0194443
NIL2	3	2	16	16	2	322NIL2	010FP2	1.87255	1.89381	1.86992	1.73219	1.84777	4.86e-07	1.8e-07	6.94e-07	1.31e-07	1.38e-09	2.95e-07	NaN	1.64711	0.612048	2.353	0.445107	0.00468491	1.44712	1.62599	0.202229	2.20101	1.71879	0.958297	0.645878	0.947621	0.919584	0.0050946
NIL2	1	2	16	16	2	122NIL2	012FP1	1.88099	1.89659	1.87632	1.72076	1.85176	4.18e-08	2.2e-08	1.06e-07	1.93e-08	5.72e-10	3e-08	NaN	1.3937	0.732689	3.53829	0.642331	0.0190415	0.784247	4.51171	0.146598	4.38158	1.05045	1.32676	0.966884	0.757784	0.531422	0.0358312
NIL2	1	5	37	37	1	151NIL2	002FP3	1.88057	1.90335	1.89829	1.7732	1.88871	5.98e-07	3.34e-07	3.52e-07	2.71e-08	2.82e-08	4.42e-07	NaN	1.35108	0.755835	0.794915	0.0612924	0.0638181	0.69207	1.1486	0.0619552	0.989303	1.04029	1.29875	0.981386	0.770171	0.33273	0.191802
NIL2	3	5	37	37	1	251NIL2	002FP3	1.88057	1.90335	1.89829	1.7732	1.88871	1.74e-07	2.24e-07	3.97e-07	2.07e-08	7.61e-09	1.96e-07	NaN	0.888773	1.147	2.03057	0.105763	0.0389035	0.69207	2.93405	0.0619552	1.70708	1.04029	0.854351	0.981386	1.16875	0.33273	0.116922
NIL2	1	5	37	37	2	152NIL2	010FP2	1.87255	1.89381	1.86992	1.73219	1.84777	4.94e-07	4.11e-07	5.07e-07	1.46e-07	4.44e-08	4.46e-07	NaN	1.10603	0.920049	1.13539	0.327074	0.0995993	1.44712	0.784586	0.202229	1.61735	1.71879	0.643495	0.645878	1.42449	0.919584	0.108309
NIL2	3	5	37	37	2	252NIL2	011FP2	1.88374	1.88426	1.87076	1.72274	1.86785	6.78e-07	1.27e-06	2.23e-06	2.47e-07	4.7e-08	9.2e-07	NaN	0.736419	1.37651	2.42392	0.268137	0.0511167	0.937812	2.58466	0.148047	1.81116	1.08108	0.68119	0.96236	1.43034	0.411209	0.124308
NIL2	2	5	37	37	2	352NIL2	012FP2	1.88245	1.87766	1.86989	1.71715	1.85858	2.8e-08	1.72e-08	4.4e-08	2.18e-09	3.52e-10	2.17e-08	Bad UBC, order of magnitude (UNF)	1.29523	0.794301	2.03151	0.100581	0.0162543	NaN	NaN	NaN	NaN	NaN	NaN	NaN	NaN	NaN	NaN
NIL2	2	7	51	51	1	H5	003 007 FP2	2.123	2.1085	2.249	1.432	2.421	2.65e-08	4.06e-08	2.05e-07	9.11e-09	2.12e-09	3.28e-08	NaN	0.808189	1.23734	6.25049	0.277833	0.0646138	0.892497	7.00338	0.051175	5.42908	1.01475	0.796444	0.985468	1.25558	0.362457	0.178266
NIL2	3	7	51	51	2	372NIL2	016FP7	1.89644	1.88728	1.89109	1.70604	1.89299	1.1e-06	1.37e-06	1.84e-06	3.48e-07	1.17e-07	1.22e-06	NaN	0.903422	1.12809	1.51299	0.286461	0.0965612	0.661754	2.28634	0.145177	1.97318	0.87103	1.03719	1.21042	0.93198	0.287181	0.336238
NIL2	1	7	51	51	2	172NIL2	019FP7	1.88187	1.90044	1.90038	1.72628	1.91807	2.89e-06	1.05e-06	2.45e-06	4.26e-07	1.54e-07	1.72e-06	NaN	1.68295	0.611657	1.42437	0.247778	0.0895665	0.825716	1.72501	0.149663	1.65558	1.12108	1.50119	0.894724	0.683627	0.286746	0.312355
NIL2	2	7	51	51	2	272NIL2	020FP7	1.88258	1.90751	1.90077	1.72032	1.92048	9.01e-07	1.02e-06	1.47e-06	8.83e-08	4.58e-08	9.54e-07	NaN	0.944494	1.07276	1.54534	0.0926029	0.0480347	0.865621	1.78524	0.176728	0.523986	1.16944	0.807648	0.858029	1.25026	0.291904	0.164557
NIL2	1	9	65	65	1	191NIL2	004FP1	1.86813	1.89054	1.87135	1.70021	1.87385	2.44e-07	3.72e-07	9.63e-07	5.08e-08	2.53e-07	3e-07	NaN	0.813099	1.24241	3.21179	0.169641	0.844345	0.876494	3.66436	0.227034	0.747204	1.11778	0.727425	0.921858	1.34772	0.389836	2.1659
NIL2	2	9	65	65	1	291NIL2	004FP2	1.87305	1.89591	1.87559	1.74662	1.87864	9.13e-07	5.05e-07	3.84e-07	4.74e-08	5.29e-07	6.63e-07	NaN	1.3775	0.762804	0.578913	0.0714945	0.79768	1.28987	0.448813	0.0723901	0.987628	1.02024	1.35017	0.833748	0.914909	0.240781	3.31289
NIL2	3	9	65	65	1	391NIL2	004FP3	1.87999	1.89718	1.86015	1.72219	1.88538	9.04e-07	7e-07	5.59e-07	4.73e-08	4.3e-07	7.86e-07	NaN	1.15068	0.89024	0.710663	0.0601548	0.547397	1.28987	0.550955	0.179254	0.335584	1.25463	0.917153	0.833748	1.06776	0.413129	1.325
NIL2	1	9	65	65	2	192NIL2	013FP2	1.89904	1.90271	1.9034	1.70761	1.889	2.26e-07	3.02e-07	1.92e-07	5.24e-08	1.81e-07	2.6e-07	NaN	0.871251	1.16267	0.737632	0.201677	0.697194	0.764524	0.964825	0.233327	0.864354	0.946251	0.92074	1.13119	1.02783	0.356246	1.95706
NIL2	3	9	65	65	2	392NIL2	014FP1	1.89092	1.8987	1.87583	1.68581	1.89428	3.74e-07	3.95e-07	3.66e-07	4.56e-08	1.37e-07	3.8e-07	NaN	0.984369	1.03857	0.961346	0.119889	0.36041	1.19098	0.807192	0.405493	0.295661	1.29674	0.759108	0.844208	1.23023	0.417674	0.862898
NIL2	2	9	65	65	2	292NIL2	015FP1	1.88579	1.88749	1.87612	1.70145	1.88913	4.01e-07	5.57e-07	5.63e-07	6.49e-08	2.53e-07	4.7e-07	NaN	0.853464	1.1839	1.19747	0.137901	0.538756	1.15935	1.03288	0.301099	0.457993	1.24228	0.687016	0.860931	1.37514	0.463419	1.16257
NIL2	1	11	79	79	1	1111NIL2	006FP3	1.87135	1.88785	1.86674	1.72318	1.88094	1.95e-06	9.38e-07	2.93e-07	2.41e-08	4.87e-07	1.33e-06	NaN	1.46842	0.707003	0.220663	0.0181526	0.367407	2.43184	0.0907391	0.367617	0.049379	3.40765	0.43092	1.5644	0.451933	1.03782	0.354016
NIL2	3	11	79	79	1	G3	007 008 FP4	1.766	2.023	2.023	1.205	2.5	9.57e-07	1.86e-06	3.78e-07	3.5e-08	1.08e-06	1.33e-06	NaN	0.71698	1.39474	0.283691	0.026264	0.807992	0.915093	0.310013	0.0815395	0.322102	0.901006	0.795754	1.10987	1.25667	0.46306	1.7449
NIL2	3	11	79	79	2	3112NIL2	014FP4	1.87992	1.91971	1.87856	1.70837	1.88699	2.41e-06	1.16e-06	3.94e-07	9.92e-08	4.89e-07	1.6e-06	NaN	1.5063	0.725478	0.245974	0.061961	0.305433	1.09719	0.224186	0.241073	0.257022	1.21167	1.24316	0.869193	0.834658	0.360863	0.846396
NIL2	2	11	79	79	2	2112NIL2	015FP3	1.89281	1.89762	1.89592	1.71722	1.92113	8.92e-07	7.2e-07	2.57e-07	3.2e-08	2.41e-07	7.92e-07	NaN	1.1266	0.90936	0.323943	0.0403607	0.304265	0.898213	0.360653	0.195903	0.206024	1.17831	0.956108	0.874314	1.04008	0.28899	1.05286
NIL2	3	14	114	114	2	3142NIL2	015FP2	1.90353	1.89417	1.87892	1.71913	1.89298	3.93e-07	6.14e-07	3.91e-08	2.44e-09	3.98e-07	4.87e-07	NaN	0.805924	1.25969	0.0803605	0.00501278	0.816343	1.04908	0.0766011	0.205684	0.0243713	1.0516	0.76638	0.968382	1.30082	0.366226	2.22907
NIL2	1	14	114	114	1	1141NIL2	016FP6	1.8662	1.90549	1.89735	1.72908	1.88794	1.73e-06	7.89e-07	1.62e-08	3.96e-09	6.93e-07	1.12e-06	NaN	1.54031	0.701191	0.0144432	0.00352388	0.615748	0.773496	0.0186726	0.122447	0.0287788	1.33059	1.15762	0.748278	0.937073	0.401535	1.53348
NIL2	2	14	114	114	1	2141NIL2	017FP1	1.87546	1.88935	1.87213	1.69524	1.8794	2.24e-07	4.68e-07	1.34e-08	7.63e-09	3.29e-07	3.17e-07	NaN	0.706613	1.47598	0.0424083	0.0240614	1.03715	1.0257	0.0413458	0.246117	0.0977638	1.18187	0.597876	0.843762	1.74929	0.443765	2.33716
NIL2	3	14	114	114	1	3141NIL2	018FP1	1.87818	1.88808	1.8758	1.73444	1.88665	7.93e-07	9.95e-07	3.79e-08	1.42e-09	1.01e-06	8.81e-07	NaN	0.900379	1.12951	0.043055	0.00161299	1.14715	0.884537	0.0486752	0.115537	0.0139608	1.0584	0.850694	0.897426	1.25861	0.344665	3.3283
NIL2	1	14	114	114	2	1142NIL2	019FP2	1.90057	1.87824	1.87982	1.7141	1.89634	2.64e-07	4.85e-07	9.31e-09	2.89e-08	6.04e-07	3.53e-07	NaN	0.747947	1.37444	0.0263734	0.0817129	1.70898	1.10612	0.023843	0.188318	0.433909	0.95616	0.78224	1.05573	1.30189	0.363931	4.69588
NIL2	2	14	114	114	2	2142NIL2	020FP2	1.90785	1.89962	1.88201	1.68971	1.90013	9.64e-07	8.04e-07	1.92e-08	2.56e-09	6.75e-07	8.63e-07	NaN	1.11758	0.931624	0.0222668	0.00296933	0.782075	1.25034	0.0178086	0.3489	0.00851056	0.987811	1.13137	1.02211	0.911474	0.418299	1.86966
NIL2	2	15	128	128	1	2151NIL2	014FP1	1.89092	1.8987	1.87583	1.68581	1.89428	7.14e-07	4.52e-07	5.48e-09	9.97e-10	4.74e-07	5.49e-07	NaN	1.29988	0.822595	0.00996939	0.00181587	0.863777	1.19098	0.00837077	0.405493	0.00447818	1.29674	1.00242	0.844208	0.974398	0.417674	2.06807
NIL2	3	15	128	128	1	3151NIL2	015FP1	1.88579	1.88749	1.87612	1.70145	1.88913	8.79e-07	1.63e-06	1.54e-08	7.96e-10	8.02e-07	1.16e-06	NaN	0.75928	1.40387	0.0132883	0.000687347	0.692726	1.15935	0.0114618	0.301099	0.00228279	1.24228	0.611201	0.860931	1.63064	0.463419	1.49482
NIL2	2	15	128	128	2	2152NIL2	017FP3	1.87941	1.89809	1.85559	1.70262	1.89286	2.94e-07	3.72e-07	3.67e-09	6.6e-11	2.09e-07	3.22e-07	NaN	0.913458	1.15594	0.0113935	0.000205065	0.650077	1.42603	0.00798966	0.239244	0.000857138	1.16481	0.784214	0.874626	1.32164	0.398456	1.63149
NIL2	3	15	128	128	2	3152NIL2	018FP2	1.88126	1.88502	1.87016	1.68571	1.89438	3.94e-07	4.62e-07	7.14e-09	2.43e-09	6.11e-07	4.2e-07	NaN	0.936662	1.1002	0.0169908	0.00578596	1.45352	1.1424	0.0148729	0.29813	0.0194075	1.16813	0.80185	0.866349	1.26992	0.404033	3.59753
NIL2	1	15	128	128	2	1152NIL2	020FP3	1.8778	1.90697	1.86206	1.71413	1.91182	1.18e-06	6.91e-07	4.23e-09	6.45e-10	5.15e-07	8.76e-07	NaN	1.34991	0.788401	0.00482648	0.000736212	0.588083	1.48009	0.00326094	0.190239	0.00386994	1.2726	1.06075	0.79661	0.989695	0.297273	1.97826
NIL2	1	13	100	100	1	1131NIL2	004FP3	1.87999	1.89718	1.86015	1.72219	1.88538	2.9e-06	1.37e-06	1.59e-07	9.95e-09	1.23e-06	1.93e-06	NaN	1.5046	0.711837	0.0822863	0.00516007	0.637034	1.28987	0.063794	0.179254	0.0287863	1.25463	1.19924	0.833748	0.853779	0.413129	1.54198
NIL2	2	13	100	100	1	2131NIL2	005FP1	1.87074	1.88866	1.86393	1.73025	1.87136	7.75e-08	8.69e-08	2.11e-08	2.83e-09	9.43e-08	7.98e-08	NaN	0.971041	1.08832	0.264702	0.0354634	1.18173	0.87872	0.301235	0.123899	0.286229	0.989991	0.980859	1.01214	1.07526	0.335857	3.51855
NIL2	3	13	100	100	1	3131NIL2	005FP2	1.87738	1.895	1.87672	1.73259	1.86768	1.83e-07	5.93e-07	8.26e-08	5.06e-09	4.73e-07	3.24e-07	NaN	0.564855	1.83193	0.255034	0.0156336	1.45981	0.850419	0.299892	0.142996	0.109329	1.08724	0.519532	0.937791	1.95346	0.424808	3.4364
NIL2	2	13	100	100	2	2132NIL2	017FP2	1.88289	1.8966	1.87626	1.68928	1.90023	3.02e-07	2.71e-07	3.65e-08	2.74e-09	1.64e-07	2.8e-07	NaN	1.07792	0.967051	0.130194	0.0097741	0.583877	1.07709	0.120876	0.291836	0.0334918	1.1308	0.953236	0.896035	1.07926	0.346238	1.68635
NIL2	3	13	100	100	2	3132NIL2	018FP2	1.88126	1.88502	1.87016	1.68571	1.89438	4.05e-07	2.98e-07	4.65e-08	6.04e-09	2.43e-07	3.46e-07	NaN	1.17149	0.862836	0.13445	0.0174715	0.702302	1.1424	0.11769	0.29813	0.0586034	1.16813	1.00288	0.866349	0.995945	0.404033	1.73823
NIL2	1	13	100	100	2	1132NIL2	019FP3	1.89621	1.89562	1.88374	1.70489	1.9038	5.81e-07	1.1e-06	8.71e-08	4.6e-09	6.72e-07	7.72e-07	NaN	0.752386	1.42226	0.112875	0.00595493	0.870266	1.05274	0.10722	0.249768	0.0238419	1.07757	0.698223	0.937987	1.51629	0.358514	2.42743
NIL2	1	17	156	156	1	1171 NIL2	T17 FP1	1.87875	1.87217	1.86863	1.69041	1.87207	1.06e-06	1.29e-06	1.82e-08	2.52e-09	3.86e-07	1.17e-06	NaN	0.91013	1.09874	0.0155771	0.00215123	0.330112	1.15354	0.0135038	0.232756	0.00924243	1.0991	0.828069	0.909836	1.20763	0.455106	0.725353
NIL2	2	17	156	156	1	2171 NIL2	T17 FP1	1.87875	1.87217	1.86863	1.69041	1.87207	8.71e-07	7e-07	7e-10	1.56e-09	8.22e-07	7.81e-07	NaN	1.1153	0.896619	0.000895686	0.00200025	1.05177	1.15354	0.000776469	0.232756	0.0085938	1.0991	1.01474	0.909836	0.985473	0.455106	2.31105
NIL2	3	17	156	156	1	3171 NIL2	T17 FP3	1.87141	1.85894	1.87842	1.70743	1.8995	1.81e-06	1.69e-06	2.03e-09	NaN	2.8e-07	1.74e-06	NaN	1.03499	0.96619	0.00116184	NaN	0.160303	0.995003	0.00116767	0.154747	NaN	1.11643	0.927056	0.895712	1.07868	0.26627	0.602032
NIL2	1	17	156	156	2	1172 NIL2	T17 FP3	1.87141	1.85894	1.87842	1.70743	1.8995	1.65e-06	7.42e-07	9.75e-10	3.99e-09	1.16e-07	1.11e-06	NaN	1.48953	0.671355	0.000882079	0.00360637	0.105147	0.995003	0.000886509	0.154747	0.0233049	1.11643	1.33419	0.895712	0.749521	0.26627	0.39489
NIL2	2	17	156	156	2	2172 NIL2	T17 FP4	1.88299	1.87427	1.85002	1.70246	1.88145	5.28e-07	2.74e-07	7.06e-10	NaN	1.92e-07	3.8e-07	NaN	1.38979	0.719532	0.00185777	NaN	0.503812	1.50587	0.00123368	0.211762	NaN	1.01314	1.37177	0.987035	0.728983	0.357668	1.4086
NIL2	3	17	156	156	2	3172 NIL2	T17 FP4	1.88299	1.87427	1.85002	1.70246	1.88145	2.14e-07	2.2e-07	8.22e-10	6.6e-10	5.65e-08	2.17e-07	NaN	0.985143	1.01508	0.00379179	0.00304565	0.260672	1.50587	0.00251801	0.211762	0.0143824	1.01314	0.97237	0.987035	1.02842	0.357668	0.728808
NIL2	22	22C 13WT10	110	100	1	13WT10221NIL2	006FP2	1.88265	1.89284	1.87491	1.75695	1.87568	1.93e-06	2e-06	2.63e-08	5.38e-09	1.44e-08	1.95e-06	NaN	0.989591	1.02374	0.0134776	0.00275633	0.00739442	0.865121	0.0155789	0.0688171	0.040053	1.00911	0.98066	0.999189	1.02457	0.389581	0.0189804
NIL2	22	22C 13WT10	110	100	3	D1	007 008 FP4	1.766	2.023	2.023	1.205	2.5	3.82e-07	3.45e-07	7.27e-09	5.74e-10	7.21e-09	3.63e-07	NaN	1.05276	0.949882	0.0200241	0.00158125	0.0198715	0.915093	0.021882	0.0815395	0.0193925	0.901006	1.16843	1.10987	0.85585	0.46306	0.0429134
NIL2	22	22C 8WT10	75	65	1	8WT10221NIL2	005FP3	1.86287	1.89244	1.86343	1.73985	1.84872	1.16e-07	1.06e-07	3.27e-08	1.77e-09	1.45e-09	1.09e-07	NaN	1.06911	0.970299	0.300278	0.0162813	0.0133436	0.90024	0.333554	0.110318	0.147585	1.19392	0.895464	0.864443	1.12246	0.476702	0.0279915
NIL2	22	22C 8WT10	75	65	2	8WT10222NIL2	005FP3	1.86287	1.89244	1.86343	1.73985	1.84872	1.64e-07	1.25e-07	1.6e-07	9.06e-09	3.38e-09	1.28e-07	NaN	1.28182	0.979537	1.24616	0.0707691	0.0263871	0.90024	1.38425	0.110318	0.6415	1.19392	1.07362	0.864443	1.13314	0.476702	0.0553535
NIL2	22	22C 8WT10	75	65	3	8WT10223NIL2	006FP1	1.87535	1.8943	1.86145	1.71724	1.85957	2.04e-08	3.9e-08	3.48e-08	3.16e-09	6.98e-10	2.82e-08	NaN	0.72535	1.38549	1.23586	0.11221	0.024755	1.07759	1.14688	0.164461	0.682294	1.2976	0.558995	0.810554	1.70932	0.573216	0.0431861
NIL2	1	3	23	23	1	131NIL2	001FP3	1.88776	1.90249	1.88946	1.76783	1.87991	3.36e-07	1.96e-07	7.27e-07	4.49e-08	5.37e-09	2.57e-07	NaN	1.31116	0.763367	2.83373	0.174845	0.0209476	0.906749	3.12515	0.0776456	2.25184	1.09732	1.19488	0.95644	0.798134	0.455825	0.0459554
NIL2	2	3	23	23	1	231NIL2	002FP1	1.87608	1.89537	1.88205	1.72199	1.8543	5.45e-09	6.85e-09	1.86e-08	3.37e-09	7.76e-10	6.07e-09	Bad UBC	0.897124	1.12779	3.06709	0.555018	0.127837	0.75207	4.07819	0.1661	3.34147	1.07309	0.83602	0.946048	1.1921	0.564559	0.226436
NIL2	3	3	23	23	1	331NIL2	002FP2	1.87118	1.89254	1.89011	1.72422	1.87263	4.83e-07	2.53e-07	5.02e-07	1.23e-07	1.57e-09	3.43e-07	NaN	1.40686	0.735616	1.46082	0.358966	0.00456304	0.715707	2.04108	0.162288	2.2119	1.26694	1.11044	0.833998	0.882036	0.456103	0.0100044
NIL2	3	3	23	23	2	332NIL2	009FP3	1.87988	1.88296	1.87016	1.71813	1.87523	2.8e-07	1.81e-07	6.51e-07	8.7e-08	1.24e-09	2.21e-07	NaN	1.26466	0.815792	2.93783	0.392811	0.00559601	0.972884	3.01971	0.13649	2.87794	0.935877	1.35131	1.08637	0.750934	0.321839	0.0173876
NIL2	1	3	23	23	2	132NIL2	011FP1	1.875	1.88906	1.8814	1.72278	1.84935	6.5e-09	1.17e-08	5.46e-08	1.64e-08	1.89e-10	8.54e-09	Bad UBC, order of magnitude (UNF)	0.760561	1.37078	6.39498	1.9171	0.0221062	NaN	NaN	NaN	NaN	NaN	NaN	NaN	NaN	NaN	NaN
NIL2	2	3	23	23	2	232NIL2	012FP1	1.88099	1.89659	1.87632	1.72076	1.85176	7.2e-07	4.94e-07	1.37e-06	1.47e-07	3.01e-09	5.87e-07	NaN	1.22777	0.842357	2.34242	0.25108	0.00513489	0.784247	2.98684	0.146598	1.71271	1.05045	1.1688	0.966884	0.871209	0.531422	0.00966255
NIL2	8	8C 13WT10	90	100	1	13WT1081NIL2	010FP3	1.88543	1.88372	1.85925	1.72716	1.86435	7.51e-07	6.1e-07	5.49e-08	2.48e-09	5.44e-07	6.74e-07	NaN	1.11516	0.904888	0.0815098	0.00368673	0.808086	1.19145	0.0684124	0.168392	0.0218938	0.997579	1.11787	1.08388	0.834861	0.54746	1.47606
NIL2	8	8C 13WT10	90	100	2	13WT1082NIL2	011FP3	1.88881	1.88016	1.85109	1.72167	1.88629	5.93e-07	1.02e-06	2.64e-08	7.75e-10	2.13e-07	7.75e-07	NaN	0.764993	1.31441	0.034059	0.000999765	0.27492	1.26525	0.0269187	0.146125	0.00684183	1.02585	0.745714	1.00505	1.3078	0.359094	0.765593
NIL2	8	8C 13WT10	90	100	3	13WT1083NIL2	012FP3	1.8895	1.90192	1.85731	1.72452	1.89094	1.72e-06	1.2e-06	1.07e-07	6.31e-09	5.99e-07	1.4e-06	NaN	1.23233	0.855745	0.0768107	0.00451274	0.428424	1.17866	0.0651677	0.176063	0.0256314	1.0656	1.15647	0.963561	0.888107	0.358734	1.19427
NIL2	8	8C 8WT10	55	65	1	F10	003 007 FP3	1.5135	1.2735	1.3425	1.452	1.524	2.69e-07	1.85e-07	9.32e-08	6.66e-09	1.3e-07	2.23e-07	NaN	1.20588	0.82927	0.417707	0.0298462	0.581824	1.12769	0.370411	0.261795	0.114006	1.31456	0.917325	0.76071	1.09013	0.481903	1.20735
NIL2	8	8C 8WT10	55	65	2	B7	007 008 FP3	1.5135	1.2735	1.3425	1.452	1.524	7.74e-07	5.09e-07	1.2e-07	4.28e-08	5.21e-07	6.28e-07	NaN	1.23353	0.810683	0.190445	0.0681663	0.830019	1.12769	0.168881	0.261795	0.26038	1.31456	0.938357	0.76071	1.06569	0.481903	1.72238
NIL2	8	8C 8WT10	55	65	3	8WT1083NIL2	009FP3	1.87988	1.88296	1.87016	1.71813	1.87523	7.8e-07	5.63e-07	1.39e-07	3.19e-08	4.47e-07	6.54e-07	NaN	1.19352	0.860502	0.211906	0.0487766	0.684373	0.972884	0.217813	0.13649	0.357364	0.935877	1.2753	1.08637	0.792089	0.321839	2.12645
SF2	2	1	9	9	1	F9	003 007 FP3	1.5135	1.2735	1.3425	1.452	1.524	1.62e-09	6.09e-09	7.4e-11	3.68e-09	2.37e-10	3.14e-09	Bad UBC, order of magnitude (FLC, VIN3)	0.51604	1.93783	0.0235327	1.16891	0.0753109	NaN	NaN	NaN	NaN	NaN	NaN	NaN	NaN	NaN	NaN
SF2	1	1	9	9	1	111SF2	006FP2	NaN	1.89284	1.87491	1.75695	1.87568	NaN	1.3e-08	1.57e-10	2.35e-09	4.17e-10	1.29e-08	Bad UBC, order of magnitude (FLC)	NaN	1.00828	0.012191	0.182424	0.0323736	NaN	NaN	NaN	NaN	NaN	NaN	NaN	NaN	NaN	NaN
SF2	1	1	9	9	2	112SF2	009FP1	1.868	1.8849	1.87638	1.74067	1.84771	9.35e-08	1.28e-07	2.06e-07	5.12e-08	2.06e-09	1.09e-07	NaN	0.859602	1.17405	1.89729	0.470394	0.0189621	0.841732	2.25403	0.0920425	5.11061	1.08201	0.794447	0.963693	1.21828	0.507846	0.0373383
SF2	2	1	9	9	2	212SF2	010FP1	1.8647	1.8809	1.87955	1.72822	1.85484	2.58e-08	2.31e-08	5.27e-08	2.19e-08	3.87e-10	2.43e-08	Bad UBC	1.06214	0.952374	2.16884	0.899497	0.0159138	0.714524	3.03537	0.110966	8.10605	1.045	1.01641	1.0011	0.951324	0.484065	0.0328753
SF2	3	1	9	9	2	312SF2	011FP1	1.875	1.88906	1.8814	1.72278	1.84935	2.27e-08	4.28e-08	5.04e-08	1.68e-08	1.84e-10	3.07e-08	NaN	0.737514	1.39354	1.63886	0.544972	0.00598655	0.780389	2.10006	0.143972	3.78525	1.28092	0.57577	0.830475	1.678	0.596948	0.0100286
SF2	1	2	16	16	1	121SF2	001FP1	1.86774	1.90213	1.87451	1.71119	1.84445	5.55e-07	2.92e-07	8.46e-07	7.2e-08	2.71e-09	3.98e-07	NaN	1.39382	0.732373	2.12575	0.180862	0.00681615	0.880708	2.41368	0.192921	0.937491	1.13909	1.22363	0.889496	0.823357	0.67031	0.0101687
SF2	2	2	16	16	1	221SF2	001FP2	1.86641	1.8869	1.86963	1.74128	1.85735	1.53e-07	6.93e-08	2.13e-07	1.48e-08	8.53e-10	1.01e-07	NaN	1.51513	0.684708	2.09902	0.145928	0.00842344	0.82159	2.55482	0.0913827	1.59688	1.17879	1.28533	0.907243	0.754712	0.492102	0.0171172
SF2	3	2	16	16	1	321SF2	001FP3	1.88776	1.90249	1.88946	1.76783	1.87991	6.11e-07	2.9e-07	5.24e-07	7.3e-08	1.52e-09	4.14e-07	NaN	1.4738	0.700641	1.26427	0.176013	0.00366117	0.906749	1.39429	0.0776456	2.26688	1.09732	1.34309	0.95644	0.732551	0.455825	0.00803196
SF2	2	2	16	16	2	222SF2	009FP2	1.86867	1.88053	1.87899	1.73996	1.85198	5.53e-07	4.61e-07	5.99e-07	5.89e-07	2.41e-09	4.95e-07	NaN	1.11807	0.930903	1.21047	1.19032	0.00486953	0.70459	1.71798	0.0982326	12.1174	1.01537	1.10114	1.02179	0.91105	0.432925	0.011248
SF2	3	2	16	16	2	322SF2	010FP1	1.8647	1.8809	1.87955	1.72822	1.85484	4.49e-07	2.14e-07	5.01e-07	9.17e-08	1.58e-09	3.09e-07	NaN	1.45252	0.691381	1.62192	0.296738	0.00510466	0.714524	2.26994	0.110966	2.67413	1.045	1.38997	1.0011	0.69062	0.484065	0.0105454
SF2	1	2	16	16	2	122SF2	012FP1	1.88099	1.89659	1.87632	1.72076	1.85176	5.69e-07	3.99e-07	1.18e-06	3.38e-07	2.52e-09	4.75e-07	NaN	1.19703	0.839634	2.48968	0.71007	0.00530663	0.784247	3.17462	0.146598	4.84365	1.05045	1.13954	0.966884	0.868391	0.531422	0.00998572
SF2	1	4	30	30	1	141	021-032 SF2 F2	1.90979	1.90099	1.89479	1.67791	1.88702	2.3e-07	2.95e-07	4.4e-07	9.97e-08	4.72e-09	2.6e-07	NaN	0.881771	1.13408	1.68984	0.382706	0.0181265	0.923801	1.82922	0.352049	1.08708	0.947786	0.930348	1.05509	1.07487	0.357815	0.0506588
SF2	2	4	30	30	1	241	021-032 SF2 F2	1.90979	1.90099	1.89479	1.67791	1.88702	4.2e-07	6.16e-07	4.11e-07	1.82e-07	5.98e-09	5.09e-07	NaN	0.825897	1.2108	0.808326	0.357567	0.0117492	0.923801	0.875	0.352049	1.01567	0.947786	0.871396	1.05509	1.14758	0.357815	0.032836
SF2	3	4	30	30	1	341	021-032 SF2 F2	1.90979	1.90099	1.89479	1.67791	1.88702	3.08e-07	4.46e-07	2.68e-07	1.06e-07	7.99e-09	3.71e-07	NaN	0.831942	1.20201	0.723906	0.286336	0.0215576	0.923801	0.783617	0.352049	0.813341	0.947786	0.877774	1.05509	1.13925	0.357815	0.0602479
SF2	1	4	30	30	2	142	021-032 SF2 F3	1.88772	1.89394	1.88283	1.67936	1.89574	3.32e-07	3.28e-07	4.26e-07	8.66e-08	4.62e-09	3.3e-07	NaN	1.00614	0.993898	1.28998	0.262329	0.0139825	0.919807	1.40245	0.312516	0.839409	1.11056	0.905974	0.900446	1.10378	0.341183	0.0409824
SF2	3	4	30	30	2	342	021-032 SF2 F3	1.88772	1.89394	1.88283	1.67936	1.89574	4.73e-07	5.16e-07	6.96e-07	1.5e-07	4.26e-09	4.94e-07	NaN	0.957661	1.04421	1.40694	0.303183	0.00861364	0.919807	1.5296	0.312516	0.970136	1.11056	0.862322	0.900446	1.15966	0.341183	0.0252464
SF2	2	4	30	30	2	242	021-032 SF2 F3	1.88772	1.89394	1.88283	1.67936	1.89574	3.93e-07	4.3e-07	6.4e-07	2.2e-07	3.97e-09	4.11e-07	NaN	0.955588	1.04648	1.5563	0.53556	0.00965096	0.919807	1.69199	0.312516	1.7137	1.11056	0.860456	0.900446	1.16218	0.341183	0.0282868
SF2	1	5	37	37	1	151SF2	002FP3	1.88057	1.90335	1.89829	1.7732	1.88871	2.46e-07	1.86e-07	1.4e-07	1.16e-08	1.35e-08	2.11e-07	NaN	1.16776	0.880827	0.662403	0.0549365	0.0638877	0.69207	0.957132	0.0619552	0.886714	1.04029	1.12253	0.981386	0.897534	0.33273	0.192011
SF2	3	5	37	37	1	251SF2	002FP3	1.88057	1.90335	1.89829	1.7732	1.88871	5.88e-07	4.26e-07	4.6e-07	3.2e-08	2.1e-08	4.91e-07	NaN	1.19815	0.868572	0.936823	0.065262	0.0427105	0.69207	1.35365	0.0619552	1.05337	1.04029	1.15175	0.981386	0.885047	0.33273	0.128364
SF2	2	5	37	37	1	H2	003 007 FP1	1.87329	1.89506	1.87916	1.73378	1.87786	7.03e-07	4.39e-07	4.45e-07	6.67e-08	2.06e-08	5.55e-07	NaN	1.2658	0.790013	0.802137	0.120226	0.0370351	0.982724	0.816238	0.181607	0.662013	1.17757	1.07493	0.849207	0.930294	0.514649	0.071962
SF2	1	5	37	37	2	152SF2	010FP3	1.88543	1.88372	1.85925	1.72716	1.86435	1.3e-06	4.77e-07	1.16e-06	1.35e-07	3.58e-08	7.75e-07	NaN	1.67195	0.615702	1.49922	0.174601	0.0462001	1.19145	1.25831	0.168392	1.03687	0.997579	1.676	1.08388	0.568054	0.54746	0.0843899
SF2	3	5	37	37	2	252SF2	011FP2	1.88374	1.88426	1.87076	1.72274	1.86785	3.88e-07	4.6e-07	3.9e-07	3.58e-08	1.39e-08	4.18e-07	NaN	0.927714	1.09835	0.932564	0.0856586	0.0332462	0.937812	0.994404	0.148047	0.57859	1.08108	0.858138	0.96236	1.14131	0.411209	0.0808499
SF2	2	5	37	37	2	352SF2	012FP2	1.88245	1.87766	1.86989	1.71715	1.85858	6.29e-07	2.74e-07	3.7e-07	2.78e-08	1.12e-08	4.09e-07	NaN	1.53887	0.670224	0.904883	0.0680412	0.027485	0.81933	1.10442	0.130602	0.520981	0.892982	1.72329	1.13319	0.591447	0.43295	0.0634831
SF2	1	6	44	44	1	161	021-032 SF2 F2	1.90979	1.90099	1.89479	1.67791	1.88702	1.8e-07	3.14e-07	4.46e-07	2.31e-07	4.48e-08	2.38e-07	NaN	0.757771	1.31966	1.87469	0.971794	0.187978	0.923801	2.02933	0.352049	2.76039	0.947786	0.799517	1.05509	1.25076	0.357815	0.525348
SF2	3	6	44	44	1	361	021-032 SF2 F2	1.90979	1.90099	1.89479	1.67791	1.88702	3.09e-07	5.25e-07	7.43e-07	2.67e-07	3.19e-08	4.03e-07	NaN	0.767331	1.30322	1.84532	0.66161	0.0792532	0.923801	1.99753	0.352049	1.87931	0.947786	0.809604	1.05509	1.23517	0.357815	0.221492
SF2	2	6	44	44	1	261	021-032 SF2 F2	1.90979	1.90099	1.89479	1.67791	1.88702	5.34e-07	4.64e-07	4.06e-07	1.23e-07	1.63e-08	4.98e-07	NaN	1.07283	0.93211	0.815213	0.246358	0.032663	0.923801	0.882455	0.352049	0.699784	0.947786	1.13194	1.05509	0.883441	0.357815	0.0912844
SF2	1	6	44	44	2	162	021-032 SF2 F3	1.88772	1.89394	1.88283	1.67936	1.89574	7.93e-07	4.65e-07	5.54e-07	2.55e-07	2.79e-08	6.07e-07	NaN	1.30579	0.765818	0.912698	0.419764	0.0458846	0.919807	0.992271	0.312516	1.34318	1.11056	1.1758	0.900446	0.850487	0.341183	0.134487
SF2	3	6	44	44	2	362	021-032 SF2 F3	1.88772	1.89394	1.88283	1.67936	1.89574	5.59e-07	4.58e-07	4.1e-07	1.14e-07	6.65e-09	5.06e-07	NaN	1.10427	0.905579	0.810778	0.224548	0.0131393	0.919807	0.881465	0.312516	0.718517	1.11056	0.994332	0.900446	1.0057	0.341183	0.038511
SF2	2	6	44	44	2	262	021-032 SF2 F3	1.88772	1.89394	1.88283	1.67936	1.89574	6.87e-07	4.36e-07	4.46e-07	2.11e-07	2.24e-08	5.47e-07	NaN	1.25453	0.797112	0.814533	0.385289	0.0409007	0.919807	0.885548	0.312516	1.23286	1.11056	1.12964	0.900446	0.885241	0.341183	0.119879
SF2	2	7	51	51	1	F5	003 007 FP2	2.123	2.1085	2.249	1.432	2.421	8.1e-08	7.74e-08	8.68e-08	6.88e-09	6.71e-09	7.92e-08	NaN	1.02305	0.977467	1.0951	0.0868211	0.0846921	0.892497	1.22701	0.051175	1.69655	1.01475	1.00819	0.985468	0.991881	0.362457	0.233661
SF2	3	7	51	51	1	G6	003 007 FP2	2.123	2.1085	2.249	1.432	2.421	7.04e-08	5.21e-08	5.35e-08	2.77e-09	7.78e-09	6.05e-08	NaN	1.16215	0.860475	0.882886	0.045772	0.128492	0.892497	0.989232	0.051175	0.894422	1.01475	1.14526	0.985468	0.873164	0.362457	0.354504
SF2	3	7	51	51	2	372SF2	016FP7	NaN	1.88728	1.89109	NaN	NaN	NaN	NaN	NaN	NaN	NaN	NaN	Bad UBC	NaN	NaN	NaN	NaN	NaN	0.661754	NaN	0.145177	NaN	0.87103	NaN	1.21042	NaN	0.287181	NaN
SF2	1	7	51	51	2	172SF2	019FP7	1.88187	1.90044	1.90038	1.72628	1.91807	1.2e-06	1.31e-06	7.15e-07	8.85e-08	9.9e-08	1.22e-06	NaN	0.984373	1.07735	0.587913	0.0727701	0.0813404	0.825716	0.712004	0.149663	0.486228	1.12108	0.878057	0.894724	1.20411	0.286746	0.283667
SF2	2	7	51	51	2	272SF2	020FP2	1.90785	1.89962	1.88201	1.68971	1.90013	2.35e-07	1.51e-07	5.27e-07	9.83e-08	2.3e-08	1.87e-07	NaN	1.25793	0.806347	2.81608	0.525254	0.122669	1.25034	2.25226	0.3489	1.50546	0.987811	1.27345	1.02211	0.788907	0.418299	0.293257
SF2	2	8	58	58	1	281	021-032 SF2 F2	1.90979	1.90099	1.89479	1.67791	1.88702	2.33e-07	4.25e-07	2.22e-07	4.16e-08	1.63e-07	3.14e-07	NaN	0.740023	1.35131	0.706928	0.132246	0.517851	0.923801	0.765239	0.352049	0.375647	0.947786	0.780791	1.05509	1.28075	0.357815	1.44726
SF2	1	8	58	58	1	181	021-032 SF2 F2	1.90979	1.90099	1.89479	1.67791	1.88702	6.45e-07	5.97e-07	4.76e-07	1.65e-07	7.7e-07	6.2e-07	NaN	1.03919	0.962286	0.766739	0.265975	1.24148	0.923801	0.829983	0.352049	0.755506	0.947786	1.09644	1.05509	0.912042	0.357815	3.46962
SF2	3	8	58	58	1	381	021-032 SF2 F3	1.88772	1.89394	1.88283	1.67936	1.89574	4.54e-07	3.97e-07	3.59e-07	1.01e-07	1.4e-07	4.24e-07	NaN	1.06915	0.935318	0.846366	0.237499	0.329753	0.919807	0.920156	0.312516	0.759959	1.11056	0.962716	0.900446	1.03873	0.341183	0.966499
SF2	2	8	58	58	2	282	021-032 SF2 F3	1.88772	1.89394	1.88283	1.67936	1.89574	6.08e-07	6.95e-07	7.08e-07	2.25e-07	4.21e-07	6.5e-07	NaN	0.93529	1.06919	1.08918	0.346071	0.647416	0.919807	1.18414	0.312516	1.10737	1.11056	0.842178	0.900446	1.1874	0.341183	1.89756
SF2	3	8	58	58	2	382	021-032 SF2 F3	1.88772	1.89394	1.88283	1.67936	1.89574	8.12e-07	6.82e-07	7.12e-07	1.98e-07	2.36e-07	7.44e-07	NaN	1.09052	0.916997	0.957011	0.266413	0.317698	0.919807	1.04045	0.312516	0.85248	1.11056	0.981951	0.900446	1.01838	0.341183	0.931166
SF2	1	9	65	65	1	191SF2	004FP1	1.86813	1.89054	1.87135	1.70021	1.87385	4.5e-07	4.79e-07	2.84e-07	2.71e-08	2.92e-07	4.47e-07	NaN	1.00706	1.07204	0.636779	0.0607104	0.653544	0.876494	0.726507	0.227034	0.267406	1.11778	0.900947	0.921858	1.16291	0.389836	1.67646
SF2	2	9	65	65	1	291SF2	004FP2	1.87305	1.89591	1.87559	1.74662	1.87864	1.91e-08	2.45e-08	1.2e-08	1.39e-09	1.75e-08	2.14e-08	Bad UBC	0.892809	1.14466	0.561773	0.0648935	0.818265	1.28987	0.435525	0.0723901	0.896441	1.02024	0.875094	0.833748	1.3729	0.240781	3.39838
SF2	3	9	65	65	1	391SF2	004FP2	1.87305	1.89591	1.87559	1.74662	1.87864	1.29e-06	1.08e-06	5.48e-07	3.5e-08	9.32e-07	1.17e-06	NaN	1.09875	0.925457	0.467424	0.0299129	0.795615	1.28987	0.362379	0.0723901	0.413218	1.02024	1.07695	0.833748	1.11	0.240781	3.30431
SF2	3	9	65	65	2	392SF2	014FP1	1.89092	1.8987	1.87583	1.68581	1.89428	8.48e-08	1.72e-07	7.69e-08	7.75e-09	3.85e-08	1.19e-07	NaN	0.710591	1.43732	0.644552	0.064941	0.322354	1.19098	0.541196	0.405493	0.160153	1.29674	0.547981	0.844208	1.70256	0.417674	0.771783
SF2	2	9	65	65	2	292SF2	015FP2	1.90353	1.89417	1.87892	1.71913	1.89298	5.31e-07	5.43e-07	2.68e-07	2.17e-08	2.1e-07	5.33e-07	NaN	0.995636	1.01931	0.502568	0.0407981	0.3947	1.04908	0.479057	0.205684	0.198353	1.0516	0.946784	0.968382	1.05259	0.366226	1.07775
SF2	1	10	72	72	1	1101	021-032 SF2 F2	1.90979	1.90099	1.89479	1.67791	1.88702	4.68e-07	6.09e-07	1.21e-07	1.85e-08	2.13e-07	5.34e-07	NaN	0.876814	1.14049	0.226202	0.0345781	0.398711	0.923801	0.24486	0.352049	0.0982195	0.947786	0.925118	1.05509	1.08094	0.357815	1.11429
SF2	2	10	72	72	1	2101	021-032 SF2 F3	1.88772	1.89394	1.88283	1.67936	1.89574	4.7e-07	3.46e-07	1.12e-07	3.16e-08	1.48e-07	4.03e-07	NaN	1.16475	0.858555	0.276618	0.0783813	0.367086	0.919807	0.300735	0.312516	0.250807	1.11056	1.04879	0.900446	0.953478	0.341183	1.07592
SF2	1	10	72	72	2	1102	021-032 SF2 F3	1.88772	1.89394	1.88283	1.67936	1.89574	9.96e-07	1.1e-06	1.29e-07	5.16e-08	5.35e-07	1.04e-06	NaN	0.952924	1.0494	0.123764	0.0493711	0.512547	0.919807	0.134555	0.312516	0.157979	1.11056	0.858057	0.900446	1.16542	0.341183	1.50227
SF2	2	10	72	72	2	2102	021-032 SF2 F3	1.88772	1.89394	1.88283	1.67936	1.89574	7.28e-07	5.47e-07	8.66e-08	1.61e-08	4.41e-07	6.31e-07	NaN	1.15358	0.866863	0.137196	0.0254951	0.698405	0.919807	0.149157	0.312516	0.0815802	1.11056	1.03874	0.900446	0.962704	0.341183	2.04701
SF2	3	10	72	72	1	3101	021-032 SF2 F3	1.88772	1.89394	1.88283	1.67936	1.89574	8.18e-07	7.1e-07	1.97e-07	5.45e-08	3.24e-07	7.62e-07	NaN	1.0733	0.931709	0.259116	0.0715719	0.425043	0.919807	0.281707	0.312516	0.229019	1.11056	0.966445	0.900446	1.03472	0.341183	1.24579
SF2	3	10	72	72	2	3102	021-032 SF2 F3	1.88772	1.89394	1.88283	1.67936	1.89574	4.11e-07	4.39e-07	2.52e-07	6.98e-08	3.57e-07	4.25e-07	NaN	0.967307	1.0338	0.594014	0.164502	0.840467	0.919807	0.645803	0.312516	0.52638	1.11056	0.871008	0.900446	1.1481	0.341183	2.46339
SF2	1	11	79	79	1	1111SF2	006FP3	1.87135	1.88785	1.86674	1.72318	1.88094	8.84e-07	7.28e-07	1.24e-07	7.18e-09	2.78e-07	7.97e-07	NaN	1.10864	0.913039	0.155793	0.00900232	0.348432	2.43184	0.0640639	0.367617	0.0244883	3.40765	0.32534	1.5644	0.583636	1.03782	0.335732
SF2	3	11	79	79	1	C3	007 008 FP4	1.766	2.023	2.023	1.205	2.5	3.37e-07	2.15e-07	9.59e-09	6.99e-10	1.68e-07	2.69e-07	NaN	1.2533	0.797895	0.0356487	0.00259771	0.62505	0.915093	0.0389563	0.0815395	0.0318584	0.901006	1.391	1.10987	0.718909	0.46306	1.34983
SF2	1	11	79	79	2	1112SF2	013FP3	1.88302	1.89314	1.87306	1.73979	1.88581	1.19e-06	1.15e-06	1.78e-07	5.5e-09	5.59e-07	1.15e-06	NaN	1.03926	0.997654	0.154935	0.00478853	0.486536	0.866381	0.178831	0.096316	0.0497169	0.939115	1.10664	1.16709	0.854825	0.242664	2.00498
SF2	3	11	79	79	2	3112SF2	014FP4	1.87992	1.91971	1.87856	1.70837	1.88699	1.39e-08	1.13e-08	3.92e-09	1.72e-09	1.35e-08	1.21e-08	Bad UBC	1.1472	0.932746	0.323177	0.141549	1.11476	1.09719	0.29455	0.241073	0.587163	1.21167	0.946793	0.869193	1.07312	0.360863	3.08914
SF2	2	11	79	79	2	2112SF2	015FP3	1.89281	1.89762	1.89592	1.71722	1.92113	1.43e-06	1.35e-06	1.16e-07	8.91e-09	3.45e-07	1.37e-06	NaN	1.04256	0.980791	0.0841426	0.00648896	0.251079	0.898213	0.0936778	0.195903	0.0331233	1.17831	0.884793	0.874314	1.12178	0.28899	0.868813
SF2	1	12	86	86	1	1121	021-032 SF2 F2	1.90979	1.90099	1.89479	1.67791	1.88702	6.62e-07	6.68e-07	8.7e-08	2.99e-08	1.66e-07	6.65e-07	NaN	0.995602	1.00442	0.130795	0.0449973	0.24916	0.923801	0.141584	0.352049	0.127815	0.947786	1.05045	1.05509	0.951973	0.357815	0.696337
SF2	3	12	86	86	1	3121	021-032 SF2 F2	1.90979	1.90099	1.89479	1.67791	1.88702	5.95e-07	7.52e-07	1.02e-07	2.16e-08	4.01e-07	6.69e-07	NaN	0.889501	1.12423	0.153294	0.0323792	0.599435	0.923801	0.165939	0.352049	0.0919735	0.947786	0.938504	1.05509	1.06553	0.357815	1.67526
SF2	2	12	86	86	1	2121	021-032 SF2 F2	1.90979	1.90099	1.89479	1.67791	1.88702	2.91e-07	5.26e-07	7.95e-08	2.32e-08	3.33e-07	3.91e-07	NaN	0.744491	1.3432	0.203287	0.0592805	0.850792	0.923801	0.220055	0.352049	0.168387	0.947786	0.785505	1.05509	1.27307	0.357815	2.37774
SF2	1	12	86	86	2	1122	021-032 SF2 F3	1.88772	1.89394	1.88283	1.67936	1.89574	5.62e-07	3.79e-07	5.29e-08	2e-08	2.99e-07	4.62e-07	NaN	1.21679	0.821831	0.114625	0.0433705	0.648478	0.919807	0.124618	0.312516	0.138779	1.11056	1.09566	0.900446	0.912693	0.341183	1.90067
SF2	3	12	86	86	2	3122	021-032 SF2 F3	1.88772	1.89394	1.88283	1.67936	1.89574	4.12e-07	5.9e-07	1e-07	2.58e-08	2.02e-07	4.93e-07	NaN	0.835393	1.19704	0.203179	0.0522233	0.409318	0.919807	0.220893	0.312516	0.167106	1.11056	0.752227	0.900446	1.32939	0.341183	1.1997
SF2	2	12	86	86	2	2122	021-032 SF2 F3	1.88772	1.89394	1.88283	1.67936	1.89574	7.6e-07	6.46e-07	8.61e-08	2.51e-08	1.25e-07	7.01e-07	NaN	1.08506	0.921605	0.122927	0.0358162	0.178291	0.919807	0.133644	0.312516	0.114606	1.11056	0.977041	0.900446	1.0235	0.341183	0.522566
SF2	3	14	114	114	2	3142SF2	015FP3	1.89281	1.89762	1.89592	1.71722	1.92113	1.08e-06	1.16e-06	1.04e-08	1.16e-09	7.49e-07	1.11e-06	NaN	0.973638	1.04806	0.0093683	0.00104744	0.674553	0.898213	0.0104299	0.195903	0.00534673	1.17831	0.826298	0.874314	1.19872	0.28899	2.33417
SF2	3	14	114	114	1	1141SF2	016FP6	1.8662	1.90549	1.89735	1.72908	1.88794	1.18e-06	7.18e-07	1.3e-08	8.54e-10	6.36e-07	8.64e-07	NaN	1.36674	0.830094	0.0150715	0.000988282	0.735974	0.773496	0.0194849	0.122447	0.00807108	1.33059	1.02717	0.748278	1.10934	0.401535	1.8329
SF2	2	14	114	114	1	2141SF2	017FP2	1.88289	1.8966	1.87626	1.68928	1.90023	3.57e-07	3.56e-07	6.28e-09	1.67e-09	4.48e-07	3.56e-07	NaN	1.00177	0.999157	0.0176219	0.00468964	1.25784	1.07709	0.0163607	0.291836	0.0160694	1.1308	0.885897	0.896035	1.11509	0.346238	3.63289
SF2	1	14	114	114	1	3141SF2	018FP1	1.87818	1.88808	1.8758	1.73444	1.88665	7.2e-07	5.71e-07	4.61e-09	4.32e-10	4.42e-07	6.39e-07	NaN	1.12597	0.89267	0.00721811	0.000676469	0.691672	0.884537	0.00816032	0.115537	0.005855	1.0584	1.06383	0.897426	0.994701	0.344665	2.0068
SF2	1	14	114	114	2	1142SF2	019FP2	1.90057	1.87824	1.87982	1.7141	1.89634	6.39e-07	8.79e-07	4.14e-09	7.31e-10	8.63e-07	7.42e-07	NaN	0.860628	1.18407	0.0055823	0.000984568	1.16212	1.10612	0.00504672	0.188318	0.00522822	0.95616	0.900088	1.05573	1.12157	0.363931	3.19324
SF2	2	14	114	114	2	2142SF2	020FP2	1.90785	1.89962	1.88201	1.68971	1.90013	4.19e-07	4.9e-07	8.94e-09	1.98e-09	5.29e-07	4.48e-07	NaN	0.935062	1.09417	0.0199435	0.0044203	1.17952	1.25034	0.0159505	0.3489	0.0126692	0.987811	0.9466	1.02211	1.0705	0.418299	2.81981
SF2	1	15	128	128	1	1151SF2	013FP1	1.89261	1.89846	NaN	NaN	NaN	9.65e-11	3.56e-11	NaN	NaN	NaN	4.95e-11	Bad UBC	1.94902	0.719663	NaN	NaN	NaN	1.31204	NaN	NaN	NaN	NaN	NaN	NaN	NaN	NaN	NaN
SF2	2	15	128	128	1	2151SF2	014FP1	1.89092	1.8987	1.87583	1.68581	1.89428	7.11e-07	7.77e-07	3.82e-09	1.06e-09	8.11e-07	7.35e-07	NaN	0.96796	1.05778	0.00519416	0.00144236	1.10336	1.19098	0.00436126	0.405493	0.00355705	1.29674	0.746455	0.844208	1.25299	0.417674	2.64167
SF2	3	15	128	128	1	3151SF2	015FP1	1.88579	1.88749	1.87612	NaN	1.88913	1.59e-06	1.28e-06	1.83e-09	NaN	6.75e-07	1.4e-06	Missing values	1.13895	0.917114	0.00130956	NaN	0.482426	1.15935	0.00112956	0.301099	NaN	1.24228	0.916824	0.860931	1.06526	0.463419	1.04101
SF2	2	15	128	128	2	2152SF2	017FP3	1.87941	1.89809	1.85559	1.70262	1.89286	5.41e-07	5.23e-07	1.64e-09	4.65e-10	3.18e-07	5.26e-07	NaN	1.02839	0.993058	0.00310701	0.000882578	0.604937	1.42603	0.00217879	0.239244	0.00368903	1.16481	0.882886	0.874626	1.13541	0.398456	1.5182
SF2	3	15	128	128	2	3152SF2	018FP7	1.8863	1.89323	1.88903	1.71439	1.89462	4.96e-07	6.76e-07	2.94e-09	1.57e-09	4.26e-07	5.72e-07	NaN	0.867787	1.1827	0.00513436	0.00274622	0.744321	0.943137	0.00544392	0.184797	0.0148607	1.03835	0.83574	0.965986	1.22435	0.390366	1.90672
SF2	1	15	128	128	2	1152SF2	020FP3	1.8778	1.90697	1.86206	NaN	1.91182	1.01e-06	6.16e-07	2.98e-09	NaN	4.72e-07	7.64e-07	Missing values	1.32128	0.806855	0.00390639	NaN	0.617862	1.48009	0.0026393	0.190239	NaN	1.2726	1.03825	0.79661	1.01286	0.297273	2.07843
SF2	1	16	142	142	1	1161	021-032 SF2 F2	1.90979	1.90099	1.89479	1.67791	1.88702	6.31e-07	7.14e-07	5.72e-10	2.67e-09	6.91e-07	6.71e-07	NaN	0.939497	1.0644	0.000852677	0.00397157	1.02996	0.923801	0.000923009	0.352049	0.0112813	0.947786	0.991254	1.05509	1.00882	0.357815	2.87848
SF2	2	16	142	142	1	2161	021-032 SF2 F3	1.88772	1.89394	1.88283	1.67936	1.89574	6.45e-07	7.29e-07	4.24e-09	3.55e-09	2.64e-07	6.86e-07	Bad UBC	0.940524	1.06324	0.00618367	0.00518188	0.385456	0.919807	0.00672279	0.312516	0.0165812	1.11056	0.846892	0.900446	1.18079	0.341183	1.12976
SF2	1	16	142	142	2	1162	021-032 SF2 F3	1.88772	1.89394	1.88283	1.67936	1.89574	7.74e-07	1.16e-06	1.12e-09	NaN	6.63e-07	9.46e-07	NaN	0.817618	1.22307	0.0011814	NaN	0.700807	0.919807	0.0012844	0.312516	NaN	1.11056	0.736221	0.900446	1.35829	0.341183	2.05405
SF2	2	16	142	142	2	2162	021-032 SF2 F3	1.88772	1.89394	1.88283	1.67936	1.89574	1.16e-06	1.1e-06	1.67e-09	2.66e-09	4.42e-07	1.13e-06	NaN	1.03007	0.970807	0.00147451	0.00235466	0.390804	0.919807	0.00160307	0.312516	0.00753452	1.11056	0.927523	0.900446	1.07814	0.341183	1.14544
SF2	3	16	142	142	1	3161	021-032 SF2 F3	1.88772	1.89394	1.88283	1.67936	1.89574	8.23e-07	9.46e-07	4.82e-09	4.5e-09	2.05e-07	8.82e-07	NaN	0.932608	1.07226	0.00545898	0.00509726	0.232346	0.919807	0.00593492	0.312516	0.0163104	1.11056	0.839763	0.900446	1.19081	0.341183	0.681
SF2	3	16	142	142	2	3162	021-032 SF2 F3	1.88772	1.89394	1.88283	1.67936	1.89574	9.13e-07	8.95e-07	1.68e-09	3.29e-09	5.11e-07	9.04e-07	NaN	1.00992	0.990175	0.00185472	0.00363912	0.564909	0.919807	0.00201643	0.312516	0.0116446	1.11056	0.90938	0.900446	1.09965	0.341183	1.65574
SF2	1	18	170	170	1	1181	021-032 SF2 F2	1.90979	1.90099	1.89479	1.67791	1.88702	3.97e-07	1.02e-06	3.89e-10	8.33e-10	2.68e-07	6.36e-07	NaN	0.624491	1.6013	0.000611409	0.00131001	0.421354	0.923801	0.00066184	0.352049	0.00372109	0.947786	0.658894	1.05509	1.51769	0.357815	1.17757
SF2	2	18	170	170	1	2181	021-032 SF2 F3	1.88772	1.89394	1.88283	1.67936	1.89574	6.51e-07	7.21e-07	2.63e-10	1.24e-09	1.63e-07	6.85e-07	NaN	0.949895	1.05275	0.000384159	0.00180603	0.238485	0.919807	0.000417652	0.312516	0.005779	1.11056	0.855329	0.900446	1.16914	0.341183	0.698994
SF2	1	18	170	170	2	1182	021-032 SF2 F3	1.88772	1.89394	1.88283	1.67936	1.89574	4.88e-07	1.15e-06	3.74e-10	NaN	3.53e-07	7.48e-07	NaN	0.652042	1.53364	0.000499267	NaN	0.472259	0.919807	0.000542795	0.312516	NaN	1.11056	0.587129	0.900446	1.7032	0.341183	1.38418
SF2	3	18	170	170	1	3181	021-032 SF2 F3	1.88772	1.89394	1.88283	1.67936	1.89574	4.27e-07	5.36e-07	9.9e-11	2.17e-09	1.74e-07	4.78e-07	NaN	0.893048	1.11976	0.000206928	0.0045445	0.363276	0.919807	0.000224969	0.312516	0.0145417	1.11056	0.804142	0.900446	1.24356	0.341183	1.06476
SF2	2	18	170	170	2	2182	021-032 SF2 F3	1.88772	1.89394	1.88283	1.67936	1.89574	5.55e-07	9.79e-07	7.89e-09	3.19e-09	3.4e-07	7.37e-07	NaN	0.753183	1.3277	0.0107005	0.00431896	0.460637	0.919807	0.0116334	0.312516	0.01382	1.11056	0.678201	0.900446	1.47449	0.341183	1.35012
SF2	3	18	170	170	1	3181	021-032 SF2 F3	1.88772	1.89394	1.88283	1.67936	1.89574	NaN	8.64e-11	1.25e-10	1.66e-09	3.83e-11	NaN	Bad UBC	NaN	NaN	NaN	NaN	NaN	0.919807	NaN	0.312516	NaN	1.11056	NaN	0.900446	NaN	0.341183	NaN
SF2	1	13	100	100	1	1131SF2	004FP3	1.87999	1.89718	1.86015	1.72219	1.88538	2.46e-07	4.54e-07	1.47e-08	3.74e-10	3.01e-07	3.24e-07	NaN	0.761779	1.40256	0.045545	0.0011567	0.929915	1.28987	0.0353096	0.179254	0.00645285	1.25463	0.607177	0.833748	1.68224	0.413129	2.25091
SF2	2	13	100	100	1	2131SF2	005FP1	1.87074	1.88866	1.86393	1.73025	1.87136	2.47e-06	2.52e-06	1.73e-07	1.09e-08	2.77e-06	2.48e-06	NaN	0.996435	1.0183	0.0695944	0.00441068	1.11886	0.87872	0.0791997	0.123899	0.0355991	0.989991	1.00651	1.01214	1.00608	0.335857	3.33134
SF2	3	13	100	100	1	3131SF2	005FP2	1.87738	1.895	1.87672	1.73259	1.86768	4.41e-07	5.63e-07	2.84e-08	1.69e-09	4.45e-07	4.95e-07	NaN	0.89134	1.13845	0.0573877	0.00341194	0.899793	0.850419	0.0674817	0.142996	0.0238603	1.08724	0.819819	0.937791	1.21396	0.424808	2.11812
SF2	2	13	100	100	2	2132SF2	017FP3	1.87941	1.89809	1.85559	NaN	1.89286	1.56e-07	2.09e-07	1.76e-08	NaN	1.59e-07	1.79e-07	Missing values	0.869995	1.16842	0.0979621	NaN	0.885162	1.42603	0.0686958	0.239244	NaN	1.16481	0.746901	0.874626	1.33591	0.398456	2.22148
SF2	3	13	100	100	2	3132SF2	018FP1	1.87818	1.88808	1.8758	1.73444	1.88665	1.04e-06	1.03e-06	5.72e-08	2.59e-09	7.4e-07	1.02e-06	NaN	1.02185	1.00877	0.0560112	0.00253699	0.724484	0.884537	0.0633227	0.115537	0.0219583	1.0584	0.96546	0.897426	1.12407	0.344665	2.102
SF2	1	13	100	100	2	1132SF2	019FP3	1.89621	1.89562	1.88374	1.70489	1.9038	8.08e-07	9.48e-07	4.44e-08	7.57e-09	8.08e-07	8.69e-07	NaN	0.930336	1.09058	0.0510614	0.0087109	0.930234	1.05274	0.0485034	0.249768	0.034876	1.07757	0.863363	0.937987	1.16268	0.358514	2.5947
SF2	1	17	156	156	1	1171 SF2	T17 FP1	1.87875	1.87217	1.86863	1.69041	1.87207	1.27e-06	1.02e-06	7.5e-10	NaN	3.81e-07	1.13e-06	NaN	1.11506	0.896817	0.000661205	NaN	0.335323	1.15354	0.000573199	0.232756	NaN	1.0991	1.01452	0.909836	0.98569	0.455106	0.736803
SF2	2	17	156	156	1	2171 SF2	T17 FP1	1.87875	1.87217	1.86863	1.69041	1.87207	1.12e-06	6.58e-07	3.49e-09	1.36e-09	3.55e-07	8.59e-07	Bad UBC	1.30558	0.765944	0.00407059	0.00158704	0.413147	1.15354	0.00352879	0.232756	0.00681849	1.0991	1.18786	0.909836	0.841848	0.455106	0.907805
SF2	3	17	156	156	1	3171 SF2	T17 FP2	1.86756	1.86273	1.86623	1.68869	1.87493	1.53e-06	9.3e-07	4.39e-10	NaN	3.7e-07	1.19e-06	NaN	1.28342	0.77917	0.00036784	NaN	0.310157	1.06957	0.000343914	0.222511	NaN	1.08395	1.18401	0.922548	0.844584	0.377291	0.822063
SF2	1	17	156	156	2	1172 SF2	T17 FP3	1.87141	1.85894	1.87842	1.70743	1.8995	1.1e-06	8.23e-07	5.75e-10	NaN	1.94e-07	9.52e-07	NaN	1.15616	0.864929	0.000604037	NaN	0.20337	0.995003	0.00060707	0.154747	NaN	1.11643	1.03559	0.895712	0.965633	0.26627	0.763774
SF2	2	17	156	156	2	2172 SF2	T17 FP4	1.88299	1.87427	1.85002	1.70246	1.88145	1.31e-06	6.46e-07	4.16e-10	NaN	4.24e-07	9.2e-07	NaN	1.42325	0.702617	0.000452864	NaN	0.460824	1.50587	0.000300733	0.211762	NaN	1.01314	1.4048	0.987035	0.711847	0.357668	1.28841
SF2	22	22C 13WT10	110	100	2	H7	003 007 FP2	2.123	2.1085	2.249	1.432	2.421	NaN	1.54e-06	6.11e-08	4.43e-09	1.11e-07	NaN	NaN	NaN	NaN	NaN	NaN	NaN	NaN	NaN	NaN	NaN	NaN	NaN	NaN	NaN	NaN	NaN
SF2	22	22C 13WT10	110	100	1	13WT10221SF2	006FP2	1.88265	1.89284	1.87491	1.75695	1.87568	8.89e-07	7.83e-07	1.44e-08	1.49e-09	4.26e-08	8.2e-07	NaN	1.08361	0.954021	0.0175161	0.00181392	0.0518695	0.865121	0.020247	0.0688171	0.0263586	1.00911	1.07383	0.999189	0.954795	0.389581	0.133142
SF2	22	22C 13WT10	110	100	3	C1	007 008 FP4	1.766	2.023	2.023	1.205	2.5	3.13e-07	3.18e-07	3.26e-09	3.74e-10	2.23e-08	3.15e-07	NaN	0.992706	1.00735	0.0103329	0.00118563	0.0706632	0.915093	0.0112917	0.0815395	0.0145406	0.901006	1.10177	1.10987	0.907626	0.46306	0.152601
SF2	22	22C 8WT10	75	65	1	8WT10221SF2	005FP3	1.86287	1.89244	1.86343	1.73985	1.84872	1.04e-07	1.31e-07	1.95e-08	1.05e-09	9.45e-10	1.15e-07	NaN	0.904712	1.1355	0.169793	0.00911764	0.00821096	0.90024	0.188608	0.110318	0.0826485	1.19392	0.757767	0.864443	1.31356	0.476702	0.0172245
SF2	22	22C 8WT10	75	65	2	8WT10222SF2	005FP3	1.86287	1.89244	1.86343	1.73985	1.84872	5.75e-07	4.04e-07	6.83e-08	7.25e-09	3.33e-09	4.76e-07	NaN	1.20722	0.848045	0.143529	0.0152207	0.00699123	0.90024	0.159434	0.110318	0.137971	1.19392	1.01115	0.864443	0.981031	0.476702	0.0146658
SF2	22	22C 8WT10	75	65	3	8WT10223SF2	006FP1	1.87535	1.8943	1.86145	1.71724	1.85957	1.65e-08	2.63e-08	5.33e-09	9.2e-10	5.84e-10	2.08e-08	NaN	0.792428	1.26363	0.255551	0.0441375	0.0280052	1.07759	0.237151	0.164461	0.268377	1.2976	0.610689	0.810554	1.55897	0.573216	0.0488564
SF2	22	22C 8WT35	100	65	2	83522-2SF2	013FP3	1.88302	1.89314	1.87306	1.73979	1.88581	5.46e-07	3.38e-07	6.17e-08	7.99e-09	1.45e-08	4.23e-07	NaN	1.29063	0.798601	0.14583	0.0188734	0.0343328	0.866381	0.168321	0.096316	0.195953	0.939115	1.3743	1.16709	0.684269	0.242664	0.141482
SF2	22	22C 8WT35	100	65	2	2171 835 22-2 SF2	T17 FP2	1.86756	1.86273	1.86623	1.68869	1.87493	2.72e-07	1.58e-07	5.07e-08	6.29e-09	9.04e-09	2.07e-07	Bad UBC	1.31023	0.763225	0.244888	0.0303667	0.043608	1.06957	0.228959	0.222511	0.136473	1.08395	1.20875	0.922548	0.827301	0.377291	0.115582
SF2	1	3	23	23	1	131SF2	001FP3	1.88776	1.90249	1.88946	1.76783	1.87991	8.42e-07	4.94e-07	9.1e-07	5.76e-08	8.69e-09	6.32e-07	NaN	1.33241	0.781713	1.43902	0.091108	0.0137498	0.906749	1.58701	0.0776456	1.17338	1.09732	1.21424	0.95644	0.817315	0.455825	0.0301647
SF2	2	3	23	23	1	231SF2	002FP1	1.87608	1.89537	1.88205	1.72199	1.8543	9.78e-08	8.61e-08	1.46e-07	2.27e-08	1.26e-09	8.92e-08	NaN	1.09691	0.965555	1.63275	0.25504	0.014119	0.75207	2.17101	0.1661	1.53546	1.07309	1.0222	0.946048	1.02062	0.564559	0.0250089
SF2	3	3	23	23	1	331SF2	002FP2	1.87118	1.89254	1.89011	1.72422	1.87263	6.38e-07	2.4e-07	2.98e-07	6.25e-08	2.13e-09	3.86e-07	NaN	1.65465	0.621456	0.772893	0.162204	0.00553666	0.715707	1.0799	0.162288	0.999482	1.26694	1.30603	0.833998	0.745153	0.456103	0.0121391
SF2	3	3	23	23	2	332SF2	009FP3	1.87988	1.88296	1.87016	1.71813	1.87523	1.07e-06	4.38e-07	8.07e-07	1.19e-07	2.83e-09	6.79e-07	NaN	1.57758	0.644267	1.18795	0.175761	0.00417108	0.972884	1.22106	0.13649	1.28772	0.935877	1.68567	1.08637	0.593046	0.321839	0.0129602
SF2	1	3	23	23	2	132SF2	011FP2	1.88374	1.88426	1.87076	1.72274	1.86785	8.08e-07	5.91e-07	1.86e-06	2.9e-07	8.52e-09	6.82e-07	NaN	1.18411	0.866579	2.72595	0.425183	0.012488	0.937812	2.90672	0.148047	2.87194	1.08108	1.09531	0.96236	0.900473	0.411209	0.030369
SF2	2	3	23	23	2	232SF2	012FP1	1.88099	1.89659	1.87632	1.72076	1.85176	8.77e-07	4.82e-07	1.15e-06	1.21e-07	3.94e-09	6.29e-07	NaN	1.39426	0.766282	1.82676	0.192646	0.00625899	0.784247	2.32932	0.146598	1.31411	1.05045	1.3273	0.966884	0.792528	0.531422	0.0117778
SF2	8	8C 13WT10	90	100	1	13WT1081SF2	010FP3	1.88543	1.88372	1.85925	1.72716	1.86435	5.28e-07	6.26e-07	1.86e-08	2.37e-09	5.71e-07	3.45e-07	NaN	1.52952	1.81367	0.0538206	0.00685816	1.65634	1.19145	0.0451724	0.168392	0.0407274	0.997579	1.53323	1.08388	1.67331	0.54746	3.0255
SF2	8	8C 13WT10	90	100	2	13WT1082SF2	011FP3	1.88881	1.88016	1.85109	1.72167	1.88629	1.79e-06	2.47e-06	6.1e-08	2.35e-08	1.09e-06	2.09e-06	NaN	0.858058	1.18121	0.0291389	0.0112459	0.519557	1.26525	0.02303	0.146125	0.0769605	1.02585	0.836434	1.00505	1.17528	0.359094	1.44685
SF2	8	8C 13WT10	90	100	3	13WT1083SF2	012FP3	1.8895	1.90192	1.85731	1.72452	1.89094	2.82e-06	2.07e-06	4.39e-08	6.34e-09	1.72e-06	2.38e-06	NaN	1.1869	0.869925	0.018467	0.00266665	0.725175	1.17866	0.0156678	0.176063	0.015146	1.0656	1.11384	0.963561	0.902823	0.358734	2.02149
SF2	8	8C 8WT10	55	65	1	F11	003 007 FP3	1.5135	1.2735	1.3425	1.452	1.524	NaN	8.82e-08	1.65e-08	4.46e-10	1.74e-08	NaN	NaN	NaN	NaN	NaN	NaN	NaN	NaN	NaN	NaN	NaN	NaN	NaN	NaN	NaN	NaN	NaN
SF2	8	8C 8WT10	55	65	2	B6	007 008 FP2	2.123	2.1085	2.249	1.432	2.421	1.99e-06	2.8e-06	3.83e-07	1.09e-08	1.6e-06	2.36e-06	NaN	0.842539	1.18689	0.161991	0.00462807	0.678488	0.892497	0.181503	0.051175	0.0904361	1.01475	0.830295	0.985468	1.20439	0.362457	1.87191
SF2	8	8C 8WT10	55	65	3	8WT1083SF2	009FP3	1.87988	1.88296	1.87016	1.71813	1.87523	2.99e-07	3.48e-07	5.71e-08	8.51e-09	2.12e-07	3.21e-07	NaN	0.929657	1.08169	0.177612	0.0264947	0.659784	0.972884	0.182562	0.13649	0.194114	0.935877	0.993354	1.08637	0.995692	0.321839	2.05004
ULL	1	1	9	9	1	111ULL	006FP2	NaN	1.89284	1.87491	1.75695	1.87568	NaN	1.59e-08	3.38e-10	4.56e-09	1.41e-10	1.58e-08	Bad UBC	NaN	1.01022	0.0214127	0.288803	0.00894414	0.865121	0.0247511	0.0688171	4.19668	1.00911	NaN	0.999189	1.01104	0.389581	0.0229584
ULL	3	1	9	9	1	F6	007 008 FP1	1.87329	1.89506	1.87916	1.73378	1.87786	1.59e-09	7.98e-09	1.64e-09	1.18e-09	6.08e-11	3.56e-09	Bad UBC	0.446343	2.24043	0.459805	0.33033	0.0170717	0.982724	0.467889	0.181607	1.81893	1.17757	0.379038	0.849207	2.63826	0.514649	0.0331715
ULL	1	1	9	9	2	112ULL	009FP1	1.868	1.8849	1.87638	1.74067	1.84771	1.35e-08	1.07e-08	3.92e-08	1.46e-08	7.41e-10	1.17e-08	Bad UBC	1.14699	0.910245	3.34237	1.24337	0.0631409	0.841732	3.97082	0.0920425	13.5087	1.08201	1.06005	0.963693	0.944539	0.507846	0.124331
ULL	2	1	9	9	2	212ULL	010FP1	1.8647	1.8809	1.87955	1.72822	1.85484	1.2e-08	4.9e-09	1.78e-08	5.84e-09	1.74e-10	7.63e-09	Bad UBC	1.56996	0.642863	2.33578	0.765564	0.0228737	0.714524	3.26901	0.110966	6.89908	1.045	1.50236	1.0011	0.642155	0.484065	0.0472534
ULL	3	1	9	9	2	312ULL	011FP1	1.875	1.88906	1.8814	1.72278	1.84935	8.17e-08	9.85e-08	1.76e-07	5.28e-08	7.83e-10	8.89e-08	NaN	0.918599	1.10751	1.97528	0.593891	0.00880902	0.780389	2.53115	0.143972	4.12503	1.28092	0.717141	0.830475	1.33359	0.596948	0.0147568
ULL	1	2	16	16	1	121ULL	001FP1	1.86774	1.90213	1.87451	1.71119	1.84445	7.45e-07	2.17e-07	1.14e-06	2.86e-07	3.48e-09	3.98e-07	NaN	1.87188	0.545358	2.86422	0.718398	0.00874507	0.880708	3.25218	0.192921	3.72379	1.13909	1.64332	0.889496	0.613109	0.67031	0.0130463
ULL	2	2	16	16	1	221ULL	001FP2	1.86641	1.8869	1.86963	1.74128	1.85735	5.48e-08	6.49e-08	1.42e-07	2.78e-08	4.33e-10	5.89e-08	NaN	0.92924	1.10132	2.41482	0.471499	0.0073494	0.82159	2.93921	0.0913827	5.15961	1.17879	0.788302	0.907243	1.21392	0.492102	0.0149347
ULL	3	2	16	16	1	321ULL	001FP3	1.88776	1.90249	1.88946	1.76783	1.87991	9.85e-07	1.61e-07	5.6e-07	5.36e-08	1.2e-09	3.91e-07	NaN	2.52144	0.411805	1.4335	0.137074	0.00308168	0.906749	1.58093	0.0776456	1.76539	1.09732	2.29782	0.95644	0.43056	0.455825	0.00676065
ULL	2	2	16	16	2	222ULL	009FP2	1.86867	1.88053	1.87899	1.73996	1.85198	2.65e-07	1.77e-07	3.51e-07	8.25e-08	1.26e-09	2.11e-07	NaN	1.25204	0.83903	1.66177	0.390307	0.00595411	0.70459	2.35849	0.0982326	3.97329	1.01537	1.23309	1.02179	0.821137	0.432925	0.0137532
ULL	3	2	16	16	2	322ULL	010FP2	1.87255	1.89381	1.86992	1.73219	1.84777	1e-07	3.53e-08	1.12e-07	2.25e-08	2.38e-10	5.87e-08	NaN	1.71269	0.602014	1.90108	0.38373	0.00405278	1.44712	1.3137	0.202229	1.89751	1.71879	0.99645	0.645878	0.932085	0.919584	0.00440718
ULL	1	2	16	16	2	122ULL	012FP1	1.88099	1.89659	1.87632	1.72076	1.85176	3.01e-07	7.14e-08	3.79e-07	7.61e-08	2.22e-10	1.44e-07	NaN	2.08549	0.494934	2.62771	0.527877	0.00153672	0.784247	3.35062	0.146598	3.60084	1.05045	1.98532	0.966884	0.511886	0.531422	0.00289172
ULL	1	5	37	37	1	151ULL	002FP2	1.87118	1.89254	1.89011	1.72422	1.87263	4.11e-07	2.89e-07	2.84e-07	1.05e-07	3.96e-08	3.32e-07	NaN	1.23972	0.871607	0.855739	0.317152	0.119457	0.715707	1.19566	0.162288	1.95425	1.26694	0.978519	0.833998	1.0451	0.456103	0.261909
ULL	3	5	37	37	1	251ULL	002FP3	1.88057	1.90335	1.89829	1.7732	1.88871	9.31e-07	3.54e-07	6.09e-07	5.53e-08	3.35e-08	5.61e-07	NaN	1.66136	0.630931	1.08642	0.0987136	0.0597267	0.69207	1.56981	0.0619552	1.59331	1.04029	1.59701	0.981386	0.642899	0.33273	0.179505
ULL	1	5	37	37	2	152ULL	010FP3	1.88543	1.88372	1.85925	1.72716	1.86435	8.96e-07	2.79e-07	1.48e-06	2.48e-07	3.6e-08	4.9e-07	NaN	1.82894	0.569969	3.02933	0.507276	0.0734236	1.19145	2.54256	0.168392	3.01247	0.997579	1.83338	1.08388	0.52586	0.54746	0.134117
ULL	3	5	37	37	2	252ULL	011FP2	1.88374	1.88426	1.87076	1.72274	1.86785	2.11e-07	4.44e-07	8.03e-07	8.55e-08	1.85e-08	3.05e-07	NaN	0.691337	1.45796	2.6363	0.280574	0.0605525	0.937812	2.81112	0.148047	1.89516	1.08108	0.639489	0.96236	1.51498	0.411209	0.147255
ULL	2	5	37	37	2	352ULL	012FP2	1.88245	1.87766	1.86989	1.71715	1.85858	9.18e-08	9.05e-08	3.4e-07	4.01e-08	6.05e-09	9.08e-08	NaN	1.01059	0.996495	3.74567	0.441769	0.0665698	0.81933	4.57162	0.130602	3.38255	0.892982	1.1317	1.13319	0.879369	0.43295	0.153759
ULL	1	7	51	51	1	F3	003 007 FP1	1.87329	1.89506	1.87916	1.73378	1.87786	4.28e-07	3.94e-07	2.65e-07	3.86e-08	1.09e-07	4.11e-07	NaN	1.04213	0.959575	0.645205	0.0938831	0.264952	0.982724	0.656548	0.181607	0.516957	1.17757	0.884982	0.849207	1.12997	0.514649	0.514821
ULL	3	7	51	51	1	C5	003 007 FP2	2.123	2.1085	2.249	1.432	2.421	3.34e-07	4.13e-07	1.99e-06	9.73e-08	5.87e-08	3.71e-07	NaN	0.899186	1.11212	5.35925	0.262197	0.158196	0.892497	6.00478	0.051175	5.12354	1.01475	0.886119	0.985468	1.12852	0.362457	0.436456
ULL	3	7	51	51	2	372ULL	016FP7	1.89644	1.88728	1.89109	1.70604	1.89299	4.38e-07	7.64e-07	9.11e-07	5.36e-07	3.4e-08	5.66e-07	NaN	0.774132	1.34874	1.60892	0.946167	0.0599681	0.661754	2.43129	0.145177	6.51732	0.87103	0.888755	1.21042	1.11427	0.287181	0.208817
ULL	1	7	51	51	2	172ULL	019FP2	1.90057	1.87824	1.87982	1.7141	1.89634	1.16e-06	9.49e-07	2.44e-06	5.97e-07	1.53e-07	1.03e-06	NaN	1.13212	0.924272	2.37122	0.581227	0.148927	1.10612	2.14372	0.188318	3.08641	0.95616	1.18403	1.05573	0.875485	0.363931	0.409216
ULL	2	7	51	51	2	272ULL	020FP2	1.90785	1.89962	1.88201	1.68971	1.90013	3.74e-07	3.01e-07	5.65e-07	5.03e-08	4.12e-08	3.3e-07	NaN	1.13233	0.910814	1.71138	0.152307	0.124837	1.25034	1.36874	0.3489	0.436534	0.987811	1.1463	1.02211	0.891114	0.418299	0.298439
ULL	1	9	65	65	1	191ULL	004FP1	1.86813	1.89054	1.87135	1.70021	1.87385	2.17e-07	1.85e-07	4.69e-07	2.83e-08	1.24e-07	1.98e-07	NaN	1.09251	0.933154	2.36437	0.142379	0.622375	0.876494	2.69753	0.227034	0.627126	1.11778	0.977398	0.921858	1.01225	0.389836	1.59651
ULL	2	9	65	65	1	291ULL	004FP2	1.87305	1.89591	1.87559	1.74662	1.87864	1.44e-08	8.95e-09	2.63e-08	2.5e-09	6.51e-09	1.13e-08	Bad UBC	1.28282	0.795032	2.33416	0.221553	0.577993	1.28987	1.8096	0.0723901	3.06054	1.02024	1.25737	0.833748	0.953564	0.240781	2.40049
ULL	3	9	65	65	1	391ULL	004FP2	1.87305	1.89591	1.87559	1.74662	1.87864	4.57e-08	4.74e-08	9.87e-08	2.98e-09	4.45e-08	4.6e-08	NaN	0.993203	1.03094	2.14388	0.0648341	0.968044	1.28987	1.66209	0.0723901	0.895621	1.02024	0.973495	0.833748	1.23651	0.240781	4.02044
ULL	1	9	65	65	2	192ULL	013FP1	1.89261	1.89846	1.88809	1.69849	1.89229	6.6e-07	8.97e-07	9.95e-07	1.24e-07	3.74e-07	7.46e-07	NaN	0.884968	1.20357	1.33384	0.166323	0.501875	1.31204	1.01661	0.362568	0.458736	1.60658	0.550838	0.981732	1.22596	0.553116	0.90736
ULL	3	9	65	65	2	392ULL	014FP7	1.88408	1.91267	1.90425	1.70712	1.89464	4.22e-07	2.63e-07	9.35e-07	9.97e-08	4.11e-07	3.33e-07	NaN	1.26785	0.791333	2.81237	0.299854	1.23634	0.861562	3.26427	0.237721	1.26137	1.19512	1.06086	0.839336	0.942808	0.436104	2.83498
ULL	2	9	65	65	2	292ULL	015FP1	1.88579	1.88749	1.87612	1.70145	1.88913	2.05e-07	2.16e-07	3.54e-07	2.85e-08	1.08e-07	2.07e-07	NaN	0.992576	1.04597	1.71165	0.137664	0.523193	1.15935	1.47638	0.301099	0.457206	1.24228	0.798997	0.860931	1.21493	0.463419	1.12899
ULL	2	11	79	79	1	H12	003 007 FP3	1.5135	1.2735	1.3425	1.452	1.524	1.22e-06	5.27e-07	2.42e-07	4.03e-08	3.52e-07	8e-07	NaN	1.5183	0.658632	0.302167	0.050401	0.439652	1.12769	0.267953	0.261795	0.192521	1.31456	1.15498	0.76071	0.865813	0.481903	0.912324
ULL	1	11	79	79	1	1111ULL	006FP3	1.87135	1.88785	1.86674	1.72318	1.88094	9.79e-07	7.39e-07	4.63e-07	1.32e-07	5.46e-07	8.29e-07	NaN	1.18	0.891029	0.558065	0.159203	0.658306	2.43184	0.229483	0.367617	0.433066	3.40765	0.346281	1.5644	0.569566	1.03782	0.634313
ULL	3	11	79	79	2	3112ULL	014FP4	1.87992	1.91971	1.87856	1.70837	1.88699	1.35e-06	1.09e-06	8.04e-07	2.05e-07	1.01e-06	1.16e-06	NaN	1.15952	0.940742	0.690651	0.175974	0.863699	1.09719	0.629473	0.241073	0.729961	1.21167	0.956967	0.869193	1.08232	0.360863	2.39343
ULL	2	11	79	79	2	2112ULL	015FP3	1.89281	1.89762	1.89592	1.71722	1.92113	2.12e-06	1.38e-06	5.04e-07	1.07e-07	5.69e-07	1.7e-06	NaN	1.24785	0.810305	0.29638	0.0630087	0.33427	0.898213	0.329967	0.195903	0.321632	1.17831	1.05901	0.874314	0.92679	0.28899	1.15668
ULL	3	14	114	114	2	3142ULL	015FP3	1.89281	1.89762	1.89592	1.71722	1.92113	8.34e-07	8.69e-07	9.01e-08	8.51e-09	8.91e-07	8.48e-07	NaN	0.984082	1.02476	0.106279	0.0100337	1.0509	0.898213	0.118322	0.195903	0.0512179	1.17831	0.835161	0.874314	1.17207	0.28899	3.63644
ULL	1	14	114	114	1	1141ULL	016FP6	1.8662	1.90549	1.89735	1.72908	1.88794	1.48e-06	8.12e-07	5.84e-08	4.46e-09	8.69e-07	1.06e-06	NaN	1.38882	0.763045	0.0548702	0.00419453	0.816782	0.773496	0.0709379	0.122447	0.0342558	1.33059	1.04377	0.748278	1.01973	0.401535	2.03415
ULL	2	14	114	114	1	2141ULL	017FP1	1.87546	1.88935	1.87213	1.69524	1.8794	2.1e-07	2.82e-07	2.03e-08	4.06e-08	1.33e-07	2.4e-07	NaN	0.877862	1.17756	0.0845891	0.169566	0.55553	1.0257	0.0824699	0.246117	0.688963	1.18187	0.742771	0.843762	1.3956	0.443765	1.25186
ULL	3	14	114	114	1	3141ULL	018FP1	1.87818	1.88808	1.8758	1.73444	1.88665	5.04e-07	4.22e-07	4.9e-08	2.03e-09	3.6e-07	4.47e-07	NaN	1.12615	0.944041	0.109625	0.0045469	0.805626	0.884537	0.123935	0.115537	0.0393545	1.0584	1.06401	0.897426	1.05194	0.344665	2.33742
ULL	1	14	114	114	2	1142ULL	019FP2	1.90057	1.87824	1.87982	1.7141	1.89634	3.94e-07	5.05e-07	3.17e-08	4.27e-09	3.54e-07	4.39e-07	NaN	0.89803	1.15174	0.0723137	0.00972395	0.806454	1.10612	0.0653757	0.188318	0.0516358	0.95616	0.939205	1.05573	1.09095	0.363931	2.21595
ULL	2	14	114	114	2	2142ULL	020FP3	1.8778	1.90697	1.86206	1.71413	1.91182	2.84e-06	1.26e-06	2.39e-07	7.95e-09	1.26e-06	1.88e-06	NaN	1.51376	0.66859	0.127416	0.00422963	0.672502	1.48009	0.0860865	0.190239	0.0222333	1.2726	1.18951	0.79661	0.839294	0.297273	2.26224
ULL	1	15	128	128	1	1151ULL	013FP1	1.89261	1.89846	1.88809	1.69849	1.89229	6.7e-07	6.42e-07	1.47e-08	8.74e-09	1.02e-06	6.5e-07	NaN	1.03045	0.98767	0.0226737	0.013445	1.56462	1.31204	0.0172813	0.362568	0.0370826	1.60658	0.641392	0.981732	1.00605	0.553116	2.82874
ULL	2	15	128	128	1	2151ULL	014FP1	1.89092	1.8987	1.87583	1.68581	1.89428	8.66e-07	7.81e-07	4.66e-08	4.52e-09	7.03e-07	8.12e-07	NaN	1.06561	0.960864	0.0573541	0.00556215	0.865178	1.19098	0.0481572	0.405493	0.013717	1.29674	0.821756	0.844208	1.13818	0.417674	2.07142
ULL	3	15	128	128	1	3151ULL	015FP1	1.88579	1.88749	1.87612	1.70145	1.88913	1.32e-06	1.06e-06	3.99e-08	8.23e-09	1.26e-06	1.16e-06	NaN	1.1359	0.913371	0.0342972	0.00708135	1.08285	1.15935	0.0295831	0.301099	0.0235184	1.24228	0.914368	0.860931	1.06091	0.463419	2.33664
ULL	2	15	128	128	2	2152ULL	017FP3	1.87941	1.89809	1.85559	1.70262	1.89286	1.06e-06	5.9e-07	4.64e-08	4.04e-09	8.14e-07	7.87e-07	NaN	1.352	0.750164	0.0589746	0.00513681	1.03459	1.42603	0.0413559	0.239244	0.021471	1.16481	1.16071	0.874626	0.857696	0.398456	2.5965
ULL	3	15	128	128	2	3152ULL	018FP2	1.88126	1.88502	1.87016	1.68571	1.89438	4.39e-07	4.12e-07	3.81e-08	4.01e-09	4.15e-07	4.2e-07	NaN	1.04581	0.980481	0.0907214	0.00954686	0.989516	1.1424	0.0794129	0.29813	0.0320225	1.16813	0.895292	0.866349	1.13174	0.404033	2.44909
ULL	1	15	128	128	2	1152ULL	020FP3	1.8778	1.90697	1.86206	1.71413	1.91182	8.48e-07	5.08e-07	3.38e-08	3.68e-09	4.36e-07	6.45e-07	NaN	1.31438	0.787513	0.0524169	0.00569979	0.675675	1.48009	0.0354147	0.190239	0.0299613	1.2726	1.03284	0.79661	0.98858	0.297273	2.27291
ULL	1	13	100	100	1	1131ULL	004FP3	1.87999	1.89718	1.86015	1.72219	1.88538	2e-06	1.38e-06	7.21e-07	5.61e-08	1.42e-06	1.6e-06	NaN	1.24781	0.861311	0.450458	0.0350506	0.888112	1.28987	0.349226	0.179254	0.195536	1.25463	0.994569	0.833748	1.03306	0.413129	2.14972
ULL	2	13	100	100	1	2131ULL	005FP1	1.87074	1.88866	1.86393	1.73025	1.87136	2.31e-07	3.79e-07	1.23e-07	9.72e-09	6.04e-07	2.96e-07	NaN	0.781941	1.28266	0.415779	0.0328787	2.04249	0.87872	0.473165	0.123899	0.265368	0.989991	0.789846	1.01214	1.26727	0.335857	6.08143
ULL	3	13	100	100	1	3131ULL	005FP2	1.87738	1.895	1.87672	1.73259	1.86768	1.05e-06	1.2e-06	3.41e-07	1.41e-07	2.31e-06	1.11e-06	NaN	0.951286	1.08533	0.308351	0.126984	2.08575	0.850419	0.362587	0.142996	0.888022	1.08724	0.874955	0.937791	1.15732	0.424808	4.90987
ULL	2	13	100	100	2	2132ULL	017FP2	1.88289	1.8966	1.87626	1.68928	1.90023	3.65e-07	3.38e-07	1.27e-07	9.93e-09	3.17e-07	3.39e-07	NaN	1.07857	0.99839	0.374696	0.0293261	0.936188	1.07709	0.347879	0.291836	0.100488	1.1308	0.953813	0.896035	1.11423	0.346238	2.70389
ULL	3	13	100	100	2	3132ULL	018FP2	1.88126	1.88502	1.87016	1.68571	1.89438	2.43e-07	1.77e-07	5.17e-08	8.09e-09	2.21e-07	2.04e-07	NaN	1.19059	0.864971	0.252936	0.0396009	1.08213	1.1424	0.221407	0.29813	0.132831	1.16813	1.01923	0.866349	0.99841	0.404033	2.67832
ULL	1	13	100	100	2	1132ULL	019FP3	1.89621	1.89562	1.88374	1.70489	1.9038	9.48e-07	7.57e-07	1.31e-07	2.29e-08	7.11e-07	8.34e-07	NaN	1.13668	0.906934	0.156647	0.0274237	0.851687	1.05274	0.1488	0.249768	0.109797	1.07757	1.05485	0.937987	0.966894	0.358514	2.37561
ULL	1	17	156	156	1	1171 ULL	T17 FP1	1.87875	1.87217	1.86863	1.69041	1.87207	1.36e-07	1.56e-07	1.63e-09	NaN	8.41e-08	1.46e-07	NaN	0.93518	1.06931	0.0111671	NaN	0.577388	1.15354	0.00968072	0.232756	NaN	1.0991	0.850861	0.909836	1.17528	0.455106	1.26869
ULL	2	17	156	156	1	2171 ULL	T17 FP2	1.86756	1.86273	1.86623	1.68869	1.87493	5.44e-06	3.53e-06	1.04e-07	1.83e-08	1.94e-06	4.38e-06	NaN	1.24079	0.80594	0.0236781	0.00416634	0.442413	1.06957	0.0221379	0.222511	0.0187242	1.08395	1.14469	0.922548	0.873602	0.377291	1.1726
ULL	3	17	156	156	1	3171 ULL	T17 FP2	1.86756	1.86273	1.86623	1.68869	1.87493	1.85e-06	1.05e-06	1.38e-08	2.15e-09	4.95e-07	1.39e-06	NaN	1.32647	0.753881	0.00992081	0.00154052	0.355343	1.06957	0.0092755	0.222511	0.00692335	1.08395	1.22373	0.922548	0.817172	0.377291	0.941825
ULL	1	17	156	156	2	1172 ULL	T17 FP3	1.87141	1.85894	1.87842	1.70743	1.8995	1.91e-06	1.36e-06	9.48e-09	1.84e-09	4.8e-07	1.61e-06	NaN	1.18853	0.841373	0.00588587	0.00114015	0.297833	0.995003	0.00591543	0.154747	0.0073678	1.11643	1.06458	0.895712	0.939334	0.26627	1.11854
ULL	2	17	156	156	2	2172 ULL	T17 FP4	1.88299	1.87427	1.85002	1.70246	1.88145	1.67e-06	5.34e-07	1.09e-08	3.15e-10	5.75e-07	9.43e-07	NaN	1.767	0.565931	0.0115968	0.000334167	0.609746	1.50587	0.00770103	0.211762	0.00157803	1.01314	1.74409	0.987035	0.573365	0.357668	1.70478
ULL	3	17	156	156	2	3172 ULL	T17 FP5	1.8793	1.89836	1.8706	1.69511	1.88532	1.61e-06	6.49e-07	4.55e-09	1.36e-09	2.7e-07	1.02e-06	NaN	1.57339	0.635569	0.00445938	0.001333	0.264225	0.856659	0.00520555	0.208815	0.00638367	1.02319	1.53774	0.977339	0.650305	0.261137	1.01183
ULL	22	22C 13WT10	110	100	1	13WT10221ULL	006FP2	1.88265	1.89284	1.87491	1.75695	1.87568	2.37e-06	1.55e-06	1.64e-07	1.41e-08	1.47e-07	1.91e-06	NaN	1.2415	0.810715	0.0857953	0.0073619	0.076973	0.865121	0.0991714	0.0688171	0.106978	1.00911	1.2303	0.999189	0.811372	0.389581	0.197579
ULL	22	22C 13WT35	135	100	1	13WT3522CULL1	017FP1	1.87546	1.88935	1.87213	1.69524	1.8794	2.7e-07	1.85e-07	2.14e-08	7e-09	5.14e-08	2.19e-07	NaN	1.23004	0.841432	0.0974798	0.0319075	0.234212	1.0257	0.0950377	0.246117	0.129644	1.18187	1.04076	0.843762	0.997239	0.443765	0.527785
ULL	22	22C 13WT35	135	100	2	13WT3522CULL2	017FP1	1.87546	1.88935	1.87213	1.69524	1.8794	4.1e-07	4.88e-07	5.75e-08	2.8e-08	8.8e-08	4.45e-07	NaN	0.922039	1.09555	0.129219	0.0629263	0.197698	1.0257	0.125982	0.246117	0.255676	1.18187	0.780151	0.843762	1.29842	0.443765	0.445501
ULL	22	22C 13WT35	135	100	3	13WT3522CULL3	017FP1	1.87546	1.88935	1.87213	1.69524	1.8794	2.07e-07	2.14e-07	4.75e-08	6.77e-09	1.35e-08	2.08e-07	NaN	0.995164	1.02744	0.228049	0.0325045	0.0647871	1.0257	0.222336	0.246117	0.132069	1.18187	0.842023	0.843762	1.21769	0.443765	0.145994
ULL	22	22C 8WT10	75	65	2	8WT10222ULL	005FP2	1.87738	1.895	1.87672	1.73259	1.86768	1.16e-07	2.46e-07	2.01e-07	2.32e-08	7.29e-09	1.65e-07	NaN	0.700012	1.48514	1.21677	0.140072	0.0440587	0.850419	1.43079	0.142996	0.97955	1.08724	0.643843	0.937791	1.58366	0.424808	0.103714
ULL	22	22C 8WT10	75	65	1	8WT10221ULL	005FP3	1.86287	1.89244	1.86343	1.73985	1.84872	1.51e-07	1.21e-07	1.53e-07	8.64e-09	2.23e-09	1.33e-07	NaN	1.13509	0.904482	1.14824	0.0647164	0.016701	0.90024	1.27548	0.110318	0.586634	1.19392	0.950726	0.864443	1.04632	0.476702	0.0350345
ULL	22	22C 8WT10	75	65	3	8WT10223ULL	006FP1	1.87535	1.8943	1.86145	NaN	NaN	4.87e-09	1.03e-08	6.21e-10	NaN	NaN	7.08e-09	Bad UBC	0.688158	1.45933	0.0877629	NaN	NaN	1.07759	NaN	NaN	NaN	NaN	NaN	NaN	NaN	NaN	NaN
ULL	22	22C 8WT35	100	65	2	8WT3522CULL2	016FP1	1.86993	1.90488	1.87282	1.61217	1.88073	8.48e-07	4.66e-07	3.55e-07	5.29e-07	1.93e-08	5.89e-07	NaN	1.43949	0.791092	0.602386	0.898877	0.0328035	0.841387	0.715944	1.23341	0.728772	1.11887	1.28656	0.887676	0.891194	0.360456	0.0910055
ULL	22	22C 8WT35	100	65	3	8WT3522CULL3	016FP1	1.86993	1.90488	1.87282	1.61217	1.88073	7.07e-07	9.61e-07	1.03e-06	1.52e-06	1.01e-08	7.94e-07	NaN	0.890979	1.21049	1.30134	1.91529	0.0126743	0.841387	1.54667	1.23341	1.55284	1.11887	0.796318	0.887676	1.36367	0.360456	0.035162
ULL	1	3	23	23	1	131ULL	001FP3	1.88776	1.90249	1.88946	1.76783	1.87991	6.79e-07	3.49e-07	1.3e-06	1.16e-07	1.07e-08	4.83e-07	NaN	1.40577	0.722938	2.68221	0.240145	0.0222067	0.906749	2.95805	0.0776456	3.09283	1.09732	1.2811	0.95644	0.755863	0.455825	0.0487175
ULL	2	3	23	23	1	231ULL	002FP1	1.87608	1.89537	1.88205	1.72199	1.8543	2.18e-08	1.68e-08	6.25e-08	1.28e-08	7.24e-10	1.89e-08	Bad UBC	1.14833	0.885294	3.30022	0.676728	0.0382114	0.75207	4.38819	0.1661	4.07422	1.07309	1.07012	0.946048	0.935781	0.564559	0.0676835
ULL	3	3	23	23	1	331ULL	002FP2	1.87118	1.89254	1.89011	1.72422	1.87263	5.53e-07	1.27e-07	3.44e-07	1.09e-07	2.79e-09	2.57e-07	NaN	2.15091	0.492382	1.33958	0.424164	0.0108377	0.715707	1.87169	0.162288	2.61365	1.26694	1.69773	0.833998	0.590388	0.456103	0.0237615
ULL	3	3	23	23	2	332ULL	009FP2	1.86867	1.88053	1.87899	1.73996	1.85198	9.29e-07	4.13e-07	1.19e-06	1.24e-07	6.25e-09	6.11e-07	NaN	1.5205	0.676117	1.95225	0.203118	0.0102373	0.70459	2.77077	0.0982326	2.06772	1.01537	1.49747	1.02179	0.661698	0.432925	0.0236468
ULL	1	3	23	23	2	132ULL	011FP2	1.88374	1.88426	1.87076	1.72274	1.86785	1.6e-06	1.1e-06	1.07e-06	2.28e-07	1.35e-08	1.3e-06	NaN	1.23081	0.841491	0.82419	0.175181	0.010362	0.937812	0.878844	0.148047	1.18328	1.08108	1.1385	0.96236	0.874404	0.411209	0.0251989
ULL	2	3	23	23	2	232ULL	012FP1	1.88099	1.89659	1.87632	1.72076	1.85176	2.62e-07	2.01e-07	9.62e-07	1.95e-07	4.6e-09	2.29e-07	NaN	1.14473	0.875888	4.19878	0.851937	0.0200715	0.784247	5.3539	0.146598	5.81138	1.05045	1.08975	0.966884	0.905887	0.531422	0.0377695
ULL	8	8C 13WT10	90	100	1	13WT1081ULL	010FP3	1.88543	1.88372	1.85925	1.72716	1.86435	2.09e-06	9.19e-07	2.17e-07	2.29e-08	1.08e-06	1.39e-06	NaN	1.51008	0.663486	0.156861	0.0165265	0.77668	1.19145	0.131656	0.168392	0.098143	0.997579	1.51374	1.08388	0.612141	0.54746	1.4187
ULL	8	8C 13WT10	90	100	2	13WT1082ULL	011FP3	1.88881	1.88016	1.85109	1.72167	1.88629	1.35e-07	2.99e-07	1.73e-08	1.56e-09	6.21e-08	1.99e-07	NaN	0.676925	1.5044	0.0867225	0.00782796	0.311981	1.26525	0.0685416	0.146125	0.0535702	1.02585	0.659866	1.00505	1.49684	0.359094	0.8688
ULL	8	8C 13WT10	90	100	3	13WT1083ULL	012FP3	1.8895	1.90192	1.85731	1.72452	1.89094	4.66e-06	2.35e-06	6.95e-07	4.79e-08	1.08e-06	3.26e-06	NaN	1.42997	0.720058	0.213371	0.0146957	0.332742	1.17866	0.181028	0.176063	0.0834688	1.0656	1.34194	0.963561	0.747288	0.358734	0.927546
ULL	8	8C 8WT10	55	65	1	D11	003 007 FP3	1.5135	1.2735	1.3425	1.452	1.524	NaN	1.67e-06	1.08e-06	7.18e-08	6.11e-07	NaN	NaN	NaN	NaN	NaN	NaN	NaN	1.12769	NaN	0.261795	NaN	1.31456	NaN	0.76071	NaN	0.481903	NaN
ULL	8	8C 8WT10	55	65	3	8WT1083ULL	009FP3	1.87988	1.88296	1.87016	1.71813	1.87523	3.65e-07	2.52e-07	1.43e-07	2.91e-08	1.21e-07	3.01e-07	NaN	1.21352	0.837661	0.476119	0.0966843	0.402517	0.972884	0.489389	0.13649	0.708361	0.935877	1.29667	1.08637	0.771065	0.321839	1.25068
VAR	2	1	9	9	1	H9	003 007 FP3	1.5135	1.2735	1.3425	1.452	1.524	8.68e-09	1.23e-08	2.19e-08	5.94e-09	5.02e-10	1.03e-08	Bad UBC	0.839979	1.19051	2.11944	0.574814	0.0486166	1.12769	1.87946	0.261795	2.19566	1.31456	0.638981	0.76071	1.56499	0.481903	0.100885
VAR	1	1	9	9	1	111VAR	006FP2	1.88265	1.89284	1.87491	1.75695	1.87568	9.39e-09	2.77e-08	6.09e-08	4.54e-09	1.66e-12	1.57e-08	Bad UBC	0.59939	1.7718	3.88907	0.289834	0.000105996	0.865121	4.4954	0.0688171	4.21166	1.00911	0.593981	0.999189	1.77324	0.389581	0.000272077
VAR	3	1	9	9	1	G5	007 008 FP2	2.123	2.1085	2.249	1.432	2.421	4e-09	1.45e-08	6.24e-09	3.03e-08	4.23e-10	7.61e-09	Bad UBC, order of magnitude UNF	0.525558	1.90274	0.820086	3.9872	0.0556626	NaN	NaN	NaN	NaN	NaN	NaN	NaN	NaN	NaN	NaN
VAR	1	1	9	9	2	112VAR	009FP1	1.868	1.8849	1.87638	1.74067	1.84771	6.68e-08	1.11e-07	4.87e-07	4.57e-08	7.95e-10	8.58e-08	NaN	0.778548	1.29016	5.67769	0.531793	0.00926267	0.841732	6.74524	0.0920425	5.77768	1.08201	0.719536	0.963693	1.33877	0.507846	0.0182391
VAR	2	1	9	9	2	212VAR	010FP1	1.8647	1.8809	1.87955	1.72822	NaN	4.3e-08	2.71e-08	1.75e-07	3.23e-08	NaN	3.38e-08	Missing values	1.27123	0.80186	5.17768	0.955367	NaN	0.714524	7.24634	0.110966	8.60953	1.045	1.21649	1.0011	0.800977	0.484065	NaN
VAR	3	1	9	9	2	312VAR	011FP1	1.875	1.88906	1.8814	1.72278	1.84935	4.71e-09	9.15e-09	2.85e-08	7.55e-09	3.6e-12	6.28e-09	Bad UBC	0.750641	1.45743	4.53931	1.20198	0.000573781	0.780389	5.81673	0.143972	8.34866	1.28092	0.586019	0.830475	1.75493	0.596948	0.000961191
VAR	1	2	16	16	1	121VAR	001FP1	1.86774	1.90213	1.87451	1.71119	1.84445	1.8e-07	4.26e-08	1.9e-07	1.19e-08	3.46e-10	8.59e-08	NaN	2.09572	0.496313	2.21177	0.138339	0.00402697	0.880708	2.51135	0.192921	0.717073	1.13909	1.83983	0.889496	0.557971	0.67031	0.00600762
VAR	2	2	16	16	1	221VAR	001FP2	1.86641	1.8869	1.86963	1.74128	1.85735	6.89e-07	6.73e-07	3.97e-06	1.72e-07	1.6e-09	6.77e-07	NaN	1.01729	0.994085	5.86176	0.254338	0.00235716	0.82159	7.13465	0.0913827	2.78322	1.17879	0.862997	0.907243	1.09572	0.492102	0.00478998
VAR	3	2	16	16	1	321VAR	001FP2	1.86641	1.8869	1.86963	1.74128	1.85735	3.22e-07	2.02e-07	6.44e-07	4.22e-08	1.02e-09	2.51e-07	NaN	1.2842	0.804025	2.56557	0.168014	0.00408015	0.82159	3.12269	0.0913827	1.83857	1.17879	1.08943	0.907243	0.886228	0.492102	0.00829126
VAR	2	2	16	16	2	222VAR	009FP2	1.86867	1.88053	1.87899	1.73996	1.85198	6.59e-07	2.93e-07	1.28e-06	1.25e-07	1.35e-09	4.37e-07	NaN	1.50696	0.6693	2.91598	0.284621	0.00309694	0.70459	4.13855	0.0982326	2.89741	1.01537	1.48414	1.02179	0.655027	0.432925	0.00715353
VAR	3	2	16	16	2	322VAR	010FP2	1.87255	1.89381	1.86992	1.73219	NaN	1.94e-07	8.96e-08	7.03e-07	6.9e-08	NaN	1.32e-07	Missing values	1.47536	0.681232	5.34274	0.524545	NaN	1.44712	3.69198	0.202229	2.59382	1.71879	0.858372	0.645878	1.05474	0.919584	NaN
VAR	1	2	16	16	2	122VAR	012FP1	1.88099	1.89659	1.87632	1.72076	1.85176	5.64e-07	3.06e-07	1.51e-06	2.48e-07	1.09e-09	4.12e-07	NaN	1.36827	0.742569	3.66668	0.602226	0.00265502	0.784247	4.67542	0.146598	4.108	1.05045	1.30256	0.966884	0.768002	0.531422	0.00499607
VAR	1	5	37	37	1	151VAR	002FP3	1.88057	1.90335	1.89829	1.7732	1.88871	2.62e-07	1.95e-07	9.28e-07	3.39e-08	8.2e-09	2.21e-07	NaN	1.18603	0.882178	4.20534	0.153678	0.0371541	0.69207	6.07646	0.0619552	2.48048	1.04029	1.14009	0.981386	0.898911	0.33273	0.111665
VAR	3	5	37	37	1	251VAR	002FP3	1.88057	1.90335	1.89829	1.7732	1.88871	4.59e-07	2.92e-07	1.18e-06	7.24e-08	4.48e-09	3.61e-07	NaN	1.27067	0.809273	3.26409	0.200517	0.0124146	0.69207	4.71642	0.0619552	3.23648	1.04029	1.22145	0.981386	0.824623	0.33273	0.0373113
VAR	2	5	37	37	1	D1	003 007 FP1	1.87329	1.89506	1.87916	1.73378	1.87786	1.86e-07	1.46e-07	5.62e-07	8.63e-08	1.66e-09	1.64e-07	NaN	1.12965	0.885229	3.42132	0.524826	0.010099	0.982724	3.48147	0.181607	2.8899	1.17757	0.959309	0.849207	1.04242	0.514649	0.0196231
VAR	1	5	37	37	2	152VAR	010FP2	1.87255	1.89381	1.86992	1.73219	1.84777	7.06e-07	4.06e-07	2.26e-06	1.84e-07	9.35e-09	5.3e-07	NaN	1.33047	0.766245	4.2595	0.347399	0.017626	1.44712	2.94343	0.202229	1.71785	1.71879	0.774073	0.645878	1.18636	0.919584	0.0191673
VAR	3	5	37	37	2	252VAR	011FP2	1.88374	1.88426	1.87076	1.72274	1.86785	5.28e-07	6.05e-07	1.73e-06	1.34e-07	3.84e-09	5.58e-07	NaN	0.947075	1.08488	3.09665	0.23966	0.00687952	0.937812	3.302	0.148047	1.61881	1.08108	0.876048	0.96236	1.12732	0.411209	0.01673
VAR	2	5	37	37	2	352VAR	012FP2	1.88245	1.87766	1.86989	1.71715	1.85858	4.19e-07	4.73e-07	2.52e-06	1.53e-07	5.78e-09	4.41e-07	NaN	0.951179	1.07361	5.70676	0.345875	0.013116	0.81933	6.96515	0.130602	2.64831	0.892982	1.06517	1.13319	0.947424	0.43295	0.0302944
VAR	1	7	51	51	1	D2	003 007 FP1	1.87329	1.89506	1.87916	1.73378	1.87786	7.62e-08	6.25e-08	2.44e-07	2.98e-08	7.62e-09	6.9e-08	NaN	1.10385	0.905917	3.5361	0.431632	0.110458	0.982724	3.59826	0.181607	2.37674	1.17757	0.937401	0.849207	1.06678	0.514649	0.214629
VAR	2	7	51	51	1	G5	003 007 FP2	2.123	2.1085	2.249	1.432	2.421	5.87e-07	4.28e-07	9.16e-07	8.4e-08	6.17e-08	5.01e-07	NaN	1.17151	0.853603	1.82788	0.1677	0.123202	0.892497	2.04806	0.051175	3.27699	1.01475	1.15448	0.985468	0.86619	0.362457	0.339909
VAR	3	7	51	51	1	H6	003 007 FP2	2.123	2.1085	2.249	1.432	2.421	8.89e-08	6.8e-08	3.01e-07	1.24e-08	6.81e-09	7.77e-08	NaN	1.14361	0.874424	3.87624	0.159095	0.087689	0.892497	4.34315	0.051175	3.10885	1.01475	1.12699	0.985468	0.887318	0.362457	0.24193
VAR	3	7	51	51	2	372VAR	016FP7	1.89644	1.88728	1.89109	1.70604	1.89299	5.08e-07	1.06e-06	2.73e-06	4.49e-07	4.52e-08	7.21e-07	NaN	0.704737	1.46454	3.7839	0.622452	0.062635	0.661754	5.71799	0.145177	4.28752	0.87103	0.809085	1.21042	1.20994	0.287181	0.218103
VAR	1	7	51	51	2	172VAR	019FP2	1.90057	1.87824	1.87982	1.7141	1.89634	1.43e-06	1.45e-06	7.1e-06	6.38e-07	1.54e-07	1.43e-06	NaN	0.997079	1.0132	4.95311	0.444697	0.107655	1.10612	4.4779	0.188318	2.36141	0.95616	1.04279	1.05573	0.959717	0.363931	0.295812
VAR	2	7	51	51	2	272VAR	020FP2	1.90785	1.89962	1.88201	1.68971	1.90013	9.94e-07	6.91e-07	3.44e-06	2.82e-07	4.24e-08	8.13e-07	NaN	1.22267	0.850109	4.23189	0.347113	0.0522249	1.25034	3.3846	0.3489	0.994877	0.987811	1.23776	1.02211	0.831722	0.418299	0.124851
VAR	1	9	65	65	1	191VAR	004FP1	1.86813	1.89054	1.87135	1.70021	1.87385	3.24e-09	1.97e-09	5.63e-09	1.32e-09	6.72e-10	2.47e-09	Bad UBC	1.30972	0.798616	2.27949	0.533429	0.272035	0.876494	2.60069	0.227034	2.34955	1.11778	1.17172	0.921858	0.866311	0.389836	0.69782
VAR	2	9	65	65	1	291VAR	004FP2	1.87305	1.89591	1.87559	1.74662	1.87864	5.81e-07	8.95e-07	2.93e-06	1.58e-07	3.18e-07	7.15e-07	NaN	0.813539	1.25252	4.0934	0.220914	0.444653	1.28987	3.17349	0.0723901	3.05172	1.02024	0.797397	0.833748	1.50227	0.240781	1.84671
VAR	3	9	65	65	1	391VAR	004FP3	1.87999	1.89718	1.86015	1.72219	1.88538	1.93e-08	1.14e-08	4.61e-08	2.01e-09	5.94e-09	1.45e-08	Bad UBC	1.33012	0.781792	3.1779	0.13873	0.409118	1.28987	2.46373	0.179254	0.773931	1.25463	1.06017	0.833748	0.937684	0.413129	0.990293
VAR	1	9	65	65	2	192VAR	013FP2	1.89904	1.90271	1.9034	1.70761	1.889	7.02e-07	8.16e-07	2.37e-06	3.69e-07	3.86e-07	7.56e-07	NaN	0.928111	1.0793	3.13985	0.487593	0.511247	0.764524	4.10694	0.233327	2.08974	0.946251	0.98083	1.13119	0.954126	0.356246	1.43509
VAR	3	9	65	65	2	392VAR	014FP6	1.90482	1.89972	1.87325	1.71499	1.87892	1.25e-06	6.12e-07	2.59e-06	1.49e-07	3.36e-07	8.6e-07	NaN	1.45663	0.711525	3.01391	0.173074	0.390425	1.34073	2.24796	0.204391	0.846776	1.03993	1.40069	1.03698	0.686154	0.581865	0.670989
VAR	2	9	65	65	2	292VAR	015FP1	1.88579	1.88749	1.87612	1.70145	1.88913	6.01e-07	1.06e-06	2.88e-06	1.67e-07	1.58e-07	7.81e-07	NaN	0.769179	1.35339	3.69031	0.213418	0.202139	1.15935	3.18307	0.301099	0.708796	1.24228	0.619169	0.860931	1.57201	0.463419	0.43619
VAR	2	11	79	79	1	B11	003 007 FP3	1.5135	1.2735	1.3425	1.452	1.524	NaN	2.99e-07	4.71e-07	3.34e-08	1.01e-07	NaN	NaN	NaN	NaN	NaN	NaN	NaN	1.12769	NaN	0.261795	NaN	1.31456	NaN	0.76071	NaN	0.481903	NaN
VAR	1	11	79	79	1	1111VAR	006FP3	1.87135	1.88785	1.86674	1.72318	1.88094	6.35e-07	6.26e-07	1.38e-06	1.41e-07	2.38e-07	6.19e-07	NaN	1.02457	1.01025	2.22438	0.228003	0.384778	2.43184	0.914693	0.367617	0.620219	3.40765	0.300667	1.5644	0.645776	1.03782	0.370755
VAR	1	11	79	79	2	1112VAR	013FP3	1.88302	1.89314	1.87306	1.73979	1.88581	1.1e-06	2.12e-06	1.94e-06	3.67e-08	5.7e-07	1.52e-06	NaN	0.722605	1.39721	1.27967	0.0241866	0.375785	0.866381	1.47703	0.096316	0.251117	0.939115	0.769453	1.16709	1.19718	0.242664	1.54858
VAR	3	11	79	79	2	3112VAR	014FP4	1.87992	1.91971	1.87856	1.70837	1.88699	5.82e-07	4.53e-07	7.74e-07	7.99e-08	1.77e-07	4.92e-07	NaN	1.18223	0.920938	1.57187	0.162232	0.359779	1.09719	1.43263	0.241073	0.67296	1.21167	0.975708	0.869193	1.05953	0.360863	0.996997
VAR	2	11	79	79	2	2112VAR	015FP3	1.89281	1.89762	1.89592	1.71722	1.92113	2.52e-06	1.78e-06	1.97e-06	1.28e-07	2.14e-07	2.05e-06	NaN	1.22794	0.871217	0.960926	0.0624533	0.104613	0.898213	1.06982	0.195903	0.318797	1.17831	1.04212	0.874314	0.996458	0.28899	0.361993
VAR	3	14	114	114	2	3142VAR	015FP2	1.90353	1.89417	1.87892	1.71913	1.89298	6.06e-07	9.04e-07	2.94e-07	1.38e-08	5.99e-07	7.24e-07	NaN	0.837621	1.24937	0.406528	0.0190672	0.827318	1.04908	0.38751	0.205684	0.0927016	1.0516	0.796523	0.968382	1.29016	0.366226	2.25904
VAR	1	14	114	114	1	1141VAR	016FP1	1.86993	1.90488	1.87282	1.61217	1.88073	6.9e-07	1.33e-06	2.55e-07	2.05e-07	8.75e-07	9.47e-07	NaN	0.728565	1.40793	0.268655	0.216905	0.923224	0.841387	0.3193	1.23341	0.175858	1.11887	0.65116	0.887676	1.58608	0.360456	2.56127
VAR	2	14	114	114	1	2141VAR	017FP2	1.88289	1.8966	1.87626	1.68928	1.90023	3.85e-07	5e-07	1.53e-07	2.9e-08	3.75e-07	4.31e-07	NaN	0.892851	1.15966	0.354253	0.0672366	0.871473	1.07709	0.328899	0.291836	0.230392	1.1308	0.789575	0.896035	1.29422	0.346238	2.51698
VAR	3	14	114	114	1	3141VAR	018FP1	1.87818	1.88808	1.8758	1.73444	1.88665	6.7e-07	4.86e-07	1.23e-07	7.08e-09	4.39e-07	5.67e-07	NaN	1.18202	0.857382	0.216525	0.0124876	0.775438	0.884537	0.244789	0.115537	0.108083	1.0584	1.1168	0.897426	0.955379	0.344665	2.24983
VAR	1	14	114	114	2	1142VAR	019FP2	1.90057	1.87824	1.87982	1.7141	1.89634	1.13e-06	2.13e-06	4.34e-07	2.27e-08	1.36e-06	1.53e-06	NaN	0.74197	1.39575	0.284194	0.0148376	0.88929	1.10612	0.256928	0.188318	0.0787903	0.95616	0.77599	1.05573	1.32208	0.363931	2.44357
VAR	2	14	114	114	2	2142VAR	020FP2	1.90785	1.89962	1.88201	1.68971	1.90013	2.5e-07	3.71e-07	1.32e-07	8.6e-09	3.15e-07	3e-07	NaN	0.832777	1.23407	0.437839	0.0286275	1.0495	1.25034	0.350176	0.3489	0.0820506	0.987811	0.843053	1.02211	1.20738	0.418299	2.50896
VAR	1	15	128	128	1	1151VAR	013FP1	1.89261	1.89846	1.88809	1.69849	1.89229	1.01e-06	2.89e-07	4.88e-08	8.91e-09	1.17e-06	5.34e-07	NaN	1.89577	0.540248	0.091288	0.0166716	2.19255	1.31204	0.0695774	0.362568	0.0459818	1.60658	1.18	0.981732	0.550301	0.553116	3.96399
VAR	2	15	128	128	1	2151VAR	014FP1	1.89092	1.8987	1.87583	1.68581	1.89428	1.37e-06	1.28e-06	9.94e-08	1.33e-08	1.1e-06	1.27e-06	NaN	1.07741	1.00775	0.0783661	0.0105126	0.869573	1.19098	0.0657999	0.405493	0.0259254	1.29674	0.830862	0.844208	1.19372	0.417674	2.08194
VAR	3	15	128	128	1	3151VAR	015FP1	1.88579	1.88749	1.87612	1.70145	1.88913	1.45e-06	7.02e-07	1.23e-07	6.79e-09	7.72e-07	9.88e-07	NaN	1.46768	0.709774	0.124714	0.00687334	0.780916	1.15935	0.107572	0.301099	0.0228275	1.24228	1.18144	0.860931	0.824427	0.463419	1.68512
VAR	2	15	128	128	2	2152VAR	017FP3	1.87941	1.89809	1.85559	1.70262	1.89286	4.79e-07	4e-07	7.4e-08	2.83e-09	3.85e-07	4.34e-07	NaN	1.10515	0.922461	0.170751	0.00652868	0.887901	1.42603	0.119739	0.239244	0.0272888	1.16481	0.94878	0.874626	1.05469	0.398456	2.22835
VAR	3	15	128	128	2	3152VAR	018FP7	1.8863	1.89323	1.88903	1.71439	1.89462	4.98e-07	7.58e-07	6.49e-08	1.37e-08	1.05e-06	6.05e-07	NaN	0.822932	1.25447	0.107381	0.0227157	1.74181	0.943137	0.113855	0.184797	0.122922	1.03835	0.792541	0.965986	1.29864	0.390366	4.46198
VAR	1	15	128	128	2	1152VAR	020FP3	1.8778	1.90697	1.86206	1.71413	1.91182	7.64e-07	9.91e-07	1.01e-07	3.95e-09	4.63e-07	8.54e-07	NaN	0.894693	1.16037	0.11844	0.00462519	0.542032	1.48009	0.0800224	0.190239	0.0243126	1.2726	0.703045	0.79661	1.45664	0.297273	1.82335
VAR	1	13	100	100	1	1131VAR	004FP3	1.87999	1.89718	1.86015	1.72219	1.88538	5.35e-07	4.55e-07	2.52e-07	1.13e-08	6.58e-07	4.77e-07	NaN	1.12096	0.952719	0.528537	0.0236152	1.3786	1.28987	0.409758	0.179254	0.131742	1.25463	0.893466	0.833748	1.14269	0.413129	3.33698
VAR	2	13	100	100	1	2131VAR	005FP1	1.87074	1.88866	1.86393	1.73025	1.87136	2.66e-06	2.78e-06	2.38e-06	1.84e-07	2.37e-06	2.69e-06	NaN	0.986468	1.03455	0.882664	0.0683995	0.881018	0.87872	1.00449	0.123899	0.552061	0.989991	0.996441	1.01214	1.02214	0.335857	2.62319
VAR	3	13	100	100	1	3131VAR	005FP1	1.87074	1.88866	1.86393	1.73025	1.87136	1.6e-07	3.65e-07	2.46e-07	9.79e-09	1.96e-07	2.37e-07	NaN	0.673162	1.5387	1.03564	0.041265	0.825886	0.87872	1.17858	0.123899	0.333055	0.989991	0.679968	1.01214	1.52024	0.335857	2.45904
VAR	2	13	100	100	2	2132VAR	017FP2	1.88289	1.8966	1.87626	1.68928	1.90023	2.27e-07	3.88e-07	2.57e-07	1.47e-08	2.67e-07	2.82e-07	NaN	0.805087	1.37474	0.910418	0.0521941	0.945971	1.07709	0.84526	0.291836	0.178847	1.1308	0.711962	0.896035	1.53425	0.346238	2.73214
VAR	3	13	100	100	2	3132VAR	018FP2	1.88126	1.88502	1.87016	1.68571	1.89438	4.39e-07	4.39e-07	3.24e-07	2.15e-08	3.68e-07	4.34e-07	NaN	1.01198	1.0122	0.748115	0.049556	0.849125	1.1424	0.654862	0.29813	0.166223	1.16813	0.866327	0.866349	1.16835	0.404033	2.10162
VAR	1	13	100	100	2	1132VAR	019FP3	1.89621	1.89562	1.88374	1.70489	1.9038	2.99e-07	4.53e-07	2.26e-07	1.5e-08	2.47e-07	3.52e-07	NaN	0.848317	1.28699	0.642231	0.0426666	0.69959	1.05274	0.610058	0.249768	0.170825	1.07757	0.787248	0.937987	1.37207	0.358514	1.95136
VAR	1	17	156	156	1	1171 VAR	T17 FP1	1.87875	1.87217	1.86863	1.69041	1.87207	1.13e-06	2.9e-07	1.46e-08	2.3e-09	1.53e-07	5.73e-07	Bad UBC	1.97546	0.506211	0.0255211	0.00400458	0.2673	1.15354	0.0221242	0.232756	0.0172051	1.0991	1.79735	0.909836	0.556376	0.455106	0.587337
VAR	2	17	156	156	1	2171 VAR	T17 FP2	1.86756	1.86273	1.86623	1.68869	1.87493	5.31e-07	5.32e-07	4.07e-08	2.36e-09	1.27e-07	5.31e-07	NaN	0.999843	1.00016	0.0766617	0.00444716	0.238483	1.06957	0.0716752	0.222511	0.0199863	1.08395	0.922404	0.922548	1.08412	0.377291	0.632091
VAR	3	17	156	156	1	3171 VAR	T17 FP2	1.86756	1.86273	1.86623	1.68869	1.87493	1.17e-06	1.3e-06	5.55e-08	1.06e-09	4.09e-07	1.23e-06	NaN	0.950481	1.0521	0.0450618	0.000863929	0.331988	1.06957	0.0421307	0.222511	0.00388264	1.08395	0.876864	0.922548	1.14043	0.377291	0.879924
VAR	1	17	156	156	2	1172 VAR	T17 FP3	1.87141	1.85894	1.87842	1.70743	1.8995	1.24e-06	1.06e-06	5.68e-08	9.23e-09	2.78e-07	1.15e-06	NaN	1.08019	0.925765	0.0495114	0.00804533	0.241982	0.995003	0.04976	0.154747	0.0519901	1.11643	0.967537	0.895712	1.03355	0.26627	0.908785
VAR	2	17	156	156	2	2172 VAR	T17 FP4	1.88299	1.87427	1.85002	1.70246	1.88145	7.51e-07	4.94e-07	2.2e-08	2.37e-09	2.63e-07	6.09e-07	NaN	1.23379	0.810508	0.036049	0.00389368	0.43229	1.50587	0.023939	0.211762	0.0183871	1.01314	1.2178	0.987035	0.821154	0.357668	1.20864
VAR	3	17	156	156	2	3172 VAR	T17 FP5	1.8793	1.89836	1.8706	1.69511	1.88532	1.13e-06	6.15e-07	3.56e-08	1.06e-08	2.76e-07	8.33e-07	NaN	1.35463	0.738208	0.0427585	0.012733	0.33163	0.856659	0.0499131	0.208815	0.0609776	1.02319	1.32393	0.977339	0.755324	0.261137	1.26995
VAR	22	22C 13WT10	110	100	1	13WT10221VAR	006FP1	1.87535	1.8943	1.86145	1.71724	1.85957	2.33e-07	3.32e-07	7.87e-08	6.25e-09	8.31e-09	2.73e-07	NaN	0.851411	1.21636	0.288196	0.0228821	0.0304143	1.07759	0.267445	0.164461	0.139134	1.2976	0.656145	0.810554	1.50065	0.573216	0.0530591
VAR	22	22C 13WT10	110	100	3	H2	007 008 FP4	1.766	2.023	2.023	1.205	2.5	1.22e-06	1.21e-06	2.15e-07	NaN	2.76e-08	1.22e-06	NaN	1.00342	0.99659	0.176823	NaN	0.0226581	0.915093	0.193229	0.0815395	NaN	0.901006	1.11367	1.10987	0.897934	0.46306	0.0489313
VAR	22	22C 13WT35	135	100	1	13WT3522CVAR1	017FP1	1.87546	1.88935	1.87213	1.69524	1.8794	4e-07	3.27e-07	6.24e-08	2.62e-09	4.93e-09	3.55e-07	NaN	1.12725	0.921109	0.175823	0.00739233	0.0138889	1.0257	0.171418	0.246117	0.0300358	1.18187	0.95378	0.843762	1.09167	0.443765	0.0312978
VAR	22	22C 13WT35	135	100	2	13WT3522CVAR2	017FP1	1.87546	1.88935	1.87213	1.69524	1.8794	2.93e-07	1.9e-07	1.38e-07	2.37e-08	3.91e-10	2.31e-07	NaN	1.268	0.82016	0.599094	0.102677	0.00169289	1.0257	0.584085	0.246117	0.417186	1.18187	1.07287	0.843762	0.972028	0.443765	0.00381483
VAR	22	22C 13WT35	135	100	3	13WT3522CVAR3	017FP1	1.87546	1.88935	1.87213	1.69524	1.8794	1.23e-07	1.93e-07	1.35e-07	2.5e-08	2.47e-09	1.53e-07	NaN	0.806857	1.26471	0.880614	0.163891	0.0161491	1.0257	0.858552	0.246117	0.665904	1.18187	0.682693	0.843762	1.4989	0.443765	0.0363911
VAR	22	22C 8WT10	75	65	2	8WT10222VAR	005FP2	1.87738	1.895	1.87672	1.73259	1.86768	6.42e-07	5.84e-07	1.23e-06	7.58e-08	3.38e-09	6.04e-07	NaN	1.06333	0.967391	2.03304	0.125497	0.00560023	0.850419	2.39064	0.142996	0.877626	1.08724	0.97801	0.937791	1.03156	0.424808	0.013183
VAR	22	22C 8WT10	75	65	1	8WT10221VAR	005FP3	1.86287	1.89244	1.86343	1.73985	1.84872	3.61e-07	3.36e-07	7.85e-07	5.42e-08	3.36e-09	3.46e-07	NaN	1.045	0.97162	2.27227	0.156799	0.00972459	0.90024	2.52407	0.110318	1.42133	1.19392	0.875268	0.864443	1.12398	0.476702	0.0203997
VAR	22	22C 8WT10	75	65	3	8WT10223VAR	006FP1	1.87535	1.8943	1.86145	1.71724	1.85957	1.07e-07	5.39e-08	2.9e-07	1.27e-08	8.68e-10	7.55e-08	NaN	1.424	0.714872	3.84308	0.168491	0.0115072	1.07759	3.56637	0.164461	1.02451	1.2976	1.09741	0.810554	0.881956	0.573216	0.0200748
VAR	22	22C 8WT35	100	65	1	8WT3522CVAR1	016FP1	1.86993	1.90488	1.87282	1.61217	1.88073	6.26e-07	6.25e-07	1.01e-06	7.09e-07	2.22e-09	6.1e-07	NaN	1.02577	1.0248	1.66049	1.16287	0.00363983	0.841387	1.97351	1.23341	0.942804	1.11887	0.916793	0.887676	1.15447	0.360456	0.0100979
VAR	22	22C 8WT35	100	65	2	8WT3522CVAR2	016FP1	1.86993	1.90488	1.87282	1.61217	1.88073	8.61e-07	6.64e-07	1.24e-06	1.17e-06	1.36e-08	7.49e-07	NaN	1.14995	0.886385	1.64936	1.56539	0.0182167	0.841387	1.96028	1.23341	1.26915	1.11887	1.02777	0.887676	0.998546	0.360456	0.0505381
VAR	22	22C 8WT35	100	65	3	8WT3522CVAR3	016FP1	1.86993	1.90488	1.87282	1.61217	1.88073	6.31e-07	8.78e-07	1.83e-06	2.31e-06	3.65e-09	7.15e-07	NaN	0.882818	1.22829	2.56266	3.22718	0.00511056	0.841387	3.04575	1.23341	2.61646	1.11887	0.789024	0.887676	1.38372	0.360456	0.014178
VAR	1	3	23	23	1	131VAR	001FP3	1.88776	1.90249	NaN	1.76783	1.87991	3.17e-10	3.27e-10	NaN	1.3e-10	2.76e-10	2.98e-10	Bad UBC, order of magnitude (VIN3)	1.0637	1.09841	NaN	0.436487	0.926027	0.906749	NaN	NaN	NaN	NaN	NaN	NaN	NaN	NaN	NaN
VAR	2	3	23	23	1	231VAR	002FP1	1.87608	1.89537	1.88205	1.72199	1.8543	9.59e-08	1.4e-07	7.23e-07	6.97e-08	6.49e-10	1.16e-07	NaN	0.82792	1.21042	6.24504	0.601604	0.00560783	0.75207	8.3038	0.1661	3.62194	1.07309	0.77153	0.946048	1.27945	0.564559	0.0099331
VAR	3	3	23	23	1	331VAR	002FP1	1.87608	1.89537	1.88205	1.72199	1.8543	7.14e-07	5.79e-07	2.85e-06	3.28e-07	2.47e-09	6.27e-07	NaN	1.1379	0.922788	4.54265	0.522492	0.00393452	0.75207	6.04019	0.1661	3.14564	1.07309	1.0604	0.946048	0.975413	0.564559	0.00696918
VAR	3	3	23	23	2	332VAR	009FP3	1.87988	1.88296	1.87016	1.71813	1.87523	3.79e-07	3.45e-07	2.19e-06	2.16e-07	1.1e-09	3.56e-07	NaN	1.06637	0.970264	6.14654	0.607786	0.00310419	0.972884	6.31786	0.13649	4.45297	0.935877	1.13943	1.08637	0.893125	0.321839	0.00964518
VAR	1	3	23	23	2	132VAR	011FP2	1.88374	1.88426	1.87076	1.72274	1.86785	5.78e-07	9.48e-07	3.48e-06	1.65e-07	1.84e-09	7.34e-07	NaN	0.787822	1.29202	4.73955	0.22486	0.00250746	0.937812	5.05384	0.148047	1.51884	1.08108	0.728738	0.96236	1.34255	0.411209	0.00609778
VAR	2	3	23	23	2	232VAR	012FP2	1.88245	1.87766	1.86989	1.71715	1.85858	5.69e-07	3.36e-07	2.19e-06	1.89e-07	1.25e-09	4.34e-07	NaN	1.3127	0.774711	5.04362	0.436308	0.00287275	0.81933	6.15578	0.130602	3.34074	0.892982	1.47001	1.13319	0.683653	0.43295	0.0066353
VAR	8	8C 13WT10	90	100	1	13WT1081VAR	010FP3	1.88543	1.88372	1.85925	1.72716	1.86435	1.12e-06	1.05e-06	6.46e-07	4.54e-08	6.71e-07	1.08e-06	NaN	1.03725	0.969989	0.599058	0.0421108	0.62171	1.19145	0.502798	0.168392	0.250076	0.997579	1.03977	1.08388	0.894924	0.54746	1.13563
VAR	8	8C 13WT10	90	100	2	13WT1082VAR	011FP3	1.88881	1.88016	1.85109	1.72167	1.88629	1.04e-06	2.1e-06	3.92e-07	2.12e-08	4.74e-07	1.48e-06	NaN	0.704978	1.41924	0.264993	0.014329	0.320199	1.26525	0.209438	0.146125	0.0980594	1.02585	0.687212	1.00505	1.4121	0.359094	0.891686
VAR	8	8C 13WT10	90	100	3	13WT1083VAR	012FP3	1.8895	1.90192	1.85731	1.72452	1.89094	3.81e-07	4.21e-07	3.58e-07	1.59e-08	3.18e-07	4e-07	NaN	0.952303	1.05353	0.894409	0.0398691	0.79443	1.17866	0.758834	0.176063	0.226449	1.0656	0.893679	0.963561	1.09338	0.358734	2.21454
VAR	8	8C 8WT10	55	65	3	8WT1083VAR	009FP3	1.87988	1.88296	1.87016	1.71813	1.87523	1.46e-07	2.01e-07	2.45e-07	2.33e-08	7.38e-08	1.7e-07	NaN	0.859931	1.17761	1.44105	0.137023	0.433026	0.972884	1.48121	0.13649	1.0039	0.935877	0.918851	1.08637	1.08399	0.321839	1.34547
VARN	2	1	9	9	1	D8	003 007 FP2	2.123	2.1085	2.249	1.432	2.421	NaN	1.35e-08	2e-09	1.68e-09	3.75e-10	NaN	Bad UBC	NaN	NaN	NaN	NaN	NaN	0.892497	NaN	0.051175	NaN	1.01475	NaN	0.985468	NaN	0.362457	NaN
VARN	3	1	9	9	1	F6	003 007 FP3	1.5135	1.2735	1.3425	1.452	1.524	4.58e-09	1.64e-08	2.57e-08	6.51e-09	1.46e-09	8.66e-09	Bad UBC	0.528136	1.89345	2.9684	0.751306	0.168281	1.12769	2.63229	0.261795	2.86982	1.31456	0.401758	0.76071	2.48906	0.481903	0.349201
VARN	1	1	9	9	1	111VARN	006FP2	NaN	1.89284	1.87491	1.75695	1.87568	NaN	9.58e-09	2.22e-10	3.57e-09	3.43e-11	9.33e-09	Bad UBC, order of magnitude (FLC)	NaN	1.02617	0.0238376	0.382973	0.00367207	NaN	NaN	NaN	NaN	NaN	NaN	NaN	NaN	NaN	NaN
VARN	1	1	9	9	2	112VARN	009FP1	1.868	1.8849	1.87638	1.74067	1.84771	1.76e-07	9.76e-08	4.16e-07	4.74e-08	1.7e-09	1.3e-07	NaN	1.35221	0.751209	3.20017	0.364794	0.0130538	0.841732	3.80188	0.0920425	3.96333	1.08201	1.24971	0.963693	0.77951	0.507846	0.0257044
VARN	2	1	9	9	2	212VARN	010FP1	1.8647	1.8809	1.87955	1.72822	1.85484	7.67e-08	6.33e-08	2.47e-07	5.62e-08	3.33e-10	6.93e-08	NaN	1.10616	0.912277	3.56194	0.810058	0.00480885	0.714524	4.98506	0.110966	7.30004	1.045	1.05853	1.0011	0.911272	0.484065	0.0099343
VARN	3	1	9	9	2	312VARN	011FP1	1.875	1.88906	1.8814	1.72278	1.84935	2.75e-07	2.73e-07	5.73e-07	7.06e-08	1.36e-09	2.55e-07	NaN	1.07775	1.07205	2.24924	0.277084	0.00535653	0.780389	2.8822	0.143972	1.92456	1.28092	0.841393	0.830475	1.29088	0.596948	0.0089732
VARN	1	2	16	16	1	121VARN	001FP1	1.86774	1.90213	1.87451	1.71119	1.84445	4.47e-07	2.74e-07	2.02e-06	2.54e-07	2.82e-09	3.34e-07	NaN	1.3393	0.82094	6.04823	0.759621	0.00845877	0.880708	6.86746	0.192921	3.93747	1.13909	1.17577	0.889496	0.922926	0.67031	0.0126192
VARN	2	2	16	16	1	221VARN	001FP2	1.86641	1.8869	1.86963	1.74128	1.85735	2.07e-08	2.2e-08	6.21e-08	6.16e-09	1.13e-10	2.12e-08	Bad UBC	0.976776	1.03495	2.92432	0.290381	0.00533685	0.82159	3.55935	0.0913827	3.17764	1.17879	0.828629	0.907243	1.14077	0.492102	0.010845
VARN	3	2	16	16	1	321VARN	001FP2	1.86641	1.8869	1.86963	1.74128	1.85735	4.51e-07	4.85e-07	9.87e-07	7.59e-08	1.38e-09	4.65e-07	NaN	0.970532	1.04459	2.12295	0.163411	0.00296317	0.82159	2.58395	0.0913827	1.7882	1.17879	0.823332	0.907243	1.15139	0.492102	0.00602144
VARN	2	2	16	16	2	222VARN	009FP2	1.86867	1.88053	1.87899	1.73996	1.85198	9.69e-09	3.5e-09	1.84e-08	2.2e-09	1.09e-09	5.74e-09	Bad UBC, order of magnitude (VIN3)	1.68836	0.610126	3.20563	0.382877	0.189556	NaN	NaN	NaN	NaN	NaN	NaN	NaN	NaN	NaN	NaN
VARN	3	2	16	16	2	322VARN	010FP2	1.87255	1.89381	1.86992	1.73219	1.84777	5.56e-07	1.86e-07	1.62e-06	1.46e-07	1.98e-09	3.2e-07	NaN	1.73768	0.581933	5.06832	0.456618	0.00618131	1.44712	3.50235	0.202229	2.25793	1.71879	1.01099	0.645878	0.900994	0.919584	0.00672185
VARN	1	2	16	16	2	122VARN	012FP1	1.88099	1.89659	1.87632	1.72076	1.85176	8e-07	2.37e-07	1.53e-06	1.82e-07	3.05e-09	4.28e-07	NaN	1.86751	0.552172	3.56707	0.424421	0.00712358	0.784247	4.5484	0.146598	2.89514	1.05045	1.77782	0.966884	0.571085	0.531422	0.0134047
VARN	1	5	37	37	1	151VARN	002FP2	1.87118	1.89254	1.89011	1.72422	1.87263	2.44e-07	2.23e-07	7.57e-07	6.17e-08	2.3e-08	2.33e-07	NaN	1.04796	0.957678	3.24928	0.264929	0.0989525	0.715707	4.53996	0.162288	1.63246	1.26694	0.827163	0.833998	1.1483	0.456103	0.216952
VARN	3	5	37	37	1	251VARN	002FP3	1.88057	1.90335	1.89829	1.7732	1.88871	3.82e-08	9.88e-08	2.02e-07	8.63e-09	3.33e-09	6.09e-08	NaN	0.627555	1.62173	3.308	0.141655	0.0546572	0.69207	4.77986	0.0619552	2.28642	1.04029	0.60325	0.981386	1.65249	0.33273	0.164269
VARN	1	5	37	37	2	152VARN	010FP2	1.87255	1.89381	1.86992	1.73219	1.84777	6.73e-07	8.43e-07	5.13e-06	2.33e-07	2.39e-08	7.48e-07	NaN	0.898866	1.12633	6.8557	0.311622	0.0319524	1.44712	4.73748	0.202229	1.54094	1.71879	0.522965	0.645878	1.74387	0.919584	0.0347465
VARN	3	5	37	37	2	252VARN	011FP2	1.88374	1.88426	1.87076	1.72274	1.86785	1.13e-06	1.68e-06	3.41e-06	3.64e-07	4.56e-08	1.376e-06	NaN	0.821065	1.22233	2.47587	0.264392	0.0331354	0.937812	2.64005	0.148047	1.78587	1.08108	0.759488	0.96236	1.27014	0.411209	0.0805804
VARN	2	5	37	37	2	352VARN	012FP2	1.88245	1.87766	1.86989	1.71715	1.85858	3.24e-08	2.35e-08	8.87e-08	6.77e-09	4.42e-10	2.71e-08	Bad UBC	1.19283	0.864297	3.2681	0.249313	0.0162827	0.70459	4.54965	0.0982326	3.89766	1.01537	1.6628	1.02179	0.597114	0.432925	0.437849
VARN	2	7	51	51	1	C3	003 007 FP1	1.87329	1.89506	1.87916	1.73378	1.87786	2.87e-07	3.78e-07	5.96e-07	5.45e-08	4.72e-08	3.29e-07	NaN	0.870938	1.14819	1.81125	0.165562	0.14339	0.982724	1.84309	0.181607	0.91165	1.17757	0.739607	0.849207	1.35207	0.514649	0.278617
VARN	3	7	51	51	1	B5	003 007 FP2	2.123	2.1085	2.249	1.432	2.421	4.15e-07	5.67e-07	1.31e-06	3.86e-08	8.48e-08	4.85e-07	NaN	0.855636	1.16872	2.70048	0.0795322	0.174926	0.892497	3.02576	0.051175	1.55412	1.01475	0.843202	0.985468	1.18596	0.362457	0.482611
VARN	3	7	51	51	2	372VARN	016FP7	1.89644	1.88728	1.89109	1.70604	1.89299	9.4e-08	1.3e-07	4.78e-07	3.35e-08	1.55e-08	1.1e-07	NaN	0.852485	1.17951	4.33022	0.303943	0.140335	0.661754	6.54355	0.145177	2.0936	0.87103	0.978709	1.21042	0.974458	0.287181	0.488664
VARN	1	7	51	51	2	172VARN	019FP2	1.90057	1.87824	1.87982	1.7141	1.89634	8.11e-07	5.35e-07	1.37e-06	1.2e-07	9.56e-08	6.46e-07	NaN	1.25679	0.828973	2.12222	0.186335	0.148056	1.10612	1.91861	0.188318	0.989471	0.95616	1.31441	1.05573	0.785216	0.363931	0.406824
VARN	2	7	51	51	2	272VARN	020FP7	1.88258	1.90751	1.90077	1.72032	1.92048	4.23e-07	5.88e-07	2.08e-06	7.95e-08	3.67e-08	4.86e-07	NaN	0.870356	1.20959	4.28752	0.163719	0.0754877	0.865621	4.95312	0.176728	0.926393	1.16944	0.744251	0.858029	1.40973	0.291904	0.258605
VARN	1	9	65	65	1	191VARN	004FP1	1.86813	1.89054	1.87135	1.70021	1.87385	7.57e-07	7.18e-07	1.65e-06	7.34e-08	5.74e-07	7.35e-07	NaN	1.02941	0.976542	2.2461	0.0997941	0.780664	0.876494	2.5626	0.227034	0.439555	1.11778	0.920944	0.921858	1.05932	0.389836	2.00255
VARN	2	9	65	65	1	291VARN	004FP1	1.86813	1.89054	1.87135	1.70021	NaN	2.4e-07	2.33e-07	3.68e-07	6.63e-08	NaN	2.3e-07	Missing values	1.04267	1.01353	1.59952	0.288253	NaN	0.876494	1.82491	0.227034	1.26965	1.11778	0.93281	0.921858	1.09944	0.389836	NaN
VARN	3	9	65	65	1	391VARN	004FP3	1.87999	1.89718	1.86015	1.72219	1.88538	1.3e-06	5.45e-07	1.48e-06	4.96e-08	4.49e-07	8.27e-07	NaN	1.57635	0.659163	1.78982	0.0599717	0.543626	1.28987	1.38759	0.179254	0.334563	1.25463	1.25643	0.833748	0.790603	0.413129	1.31588
VARN	1	9	65	65	2	192VARN	013FP2	1.89904	1.90271	1.9034	1.70761	1.889	3.71e-07	4.06e-07	7.44e-07	1.05e-07	4.38e-07	3.83e-07	NaN	0.969842	1.06102	1.94293	0.27452	1.14402	0.764524	2.54135	0.233327	1.17655	0.946251	1.02493	1.13119	0.937964	0.356246	3.21133
VARN	3	9	65	65	2	392VARN	014FP6	1.90482	1.89972	1.87325	1.71499	1.87892	2.03e-06	1.67e-06	2.98e-06	9.38e-08	1.04e-06	1.82e-06	NaN	1.11228	0.915255	1.63791	0.0515065	0.570491	1.34073	1.22165	0.204391	0.251999	1.03993	1.06957	1.03698	0.88262	0.581865	0.980452
VARN	2	9	65	65	2	292VARN	015FP2	1.90353	1.89417	1.87892	1.71913	1.89298	3.56e-07	5.63e-07	2.42e-06	1.17e-07	2.19e-07	4.47e-07	NaN	0.795747	1.25892	5.41045	0.262646	0.490864	1.04908	5.15734	0.205684	1.27694	1.0516	0.756703	0.968382	1.30003	0.366226	1.34033
VARN	2	11	79	79	1	E12	003 007 FP3	1.5135	1.2735	1.3425	1.452	1.524	7.79e-07	7.82e-07	6.32e-07	2.31e-08	4.14e-07	7.8e-07	NaN	0.997877	1.00213	0.809792	0.0295615	0.530938	1.12769	0.7181	0.261795	0.112918	1.31456	0.759096	0.76071	1.31736	0.481903	1.10175
VARN	1	11	79	79	1	1111VARN	006FP3	1.87135	1.88785	1.86674	1.72318	1.88094	8.58e-07	7.36e-07	3.31e-07	2.41e-08	2.81e-07	7.82e-07	NaN	1.09732	0.941204	0.423783	0.0308121	0.359398	2.43184	0.174265	0.367617	0.0838157	3.40765	0.322017	1.5644	0.60164	1.03782	0.346299
VARN	3	11	79	79	1	D4	007 008 FP4	1.766	2.023	2.023	1.205	2.5	5.31e-07	6.33e-07	3.16e-07	6.84e-09	3.32e-07	5.8e-07	NaN	0.915746	1.09201	0.545326	0.011809	0.572282	0.915093	0.595925	0.0815395	0.144826	0.901006	1.01636	1.10987	0.983904	0.46306	1.23587
VARN	1	11	79	79	2	1112VARN	013FP3	NaN	NaN	NaN	NaN	1.88581	NaN	NaN	NaN	NaN	1.87e-13	NaN	Bad UBC	NaN	NaN	NaN	NaN	NaN	0.866381	NaN	0.096316	NaN	0.939115	NaN	1.16709	NaN	0.242664	NaN
VARN	3	11	79	79	2	3112VARN	014FP4	1.87992	1.91971	1.87856	1.70837	1.88699	1.249e-06	6.11e-07	4.32e-07	2.97e-08	4.11e-07	8.62e-07	NaN	1.44903	0.708697	0.500714	0.0344203	0.477215	1.09719	0.456361	0.241073	0.14278	1.21167	1.1959	0.869193	0.81535	0.360863	1.32243
VARN	2	11	79	79	2	2112VARN	015FP3	1.89281	1.89762	1.89592	1.71722	1.92113	1.14e-06	7.96e-07	5.87e-07	4.52e-08	2.66e-07	9.42e-07	NaN	1.21181	0.844595	0.623323	0.0479728	0.281934	0.898213	0.693959	0.195903	0.24488	1.17831	1.02843	0.874314	0.966008	0.28899	0.975582
VARN	3	14	114	114	2	3142VARN	015FP2	1.90353	1.89417	1.87892	1.71913	1.89298	7.39e-07	8.88e-07	6.99e-08	1.03e-09	7.89e-07	7.94e-07	NaN	0.9305	1.11762	0.0879921	0.00130089	0.993721	1.04908	0.0838757	0.205684	0.00632469	1.0516	0.884844	0.968382	1.15411	0.366226	2.71341
VARN	1	14	114	114	1	1141VARN	016FP1	1.86993	1.90488	1.87282	1.61217	1.88073	1.71e-06	1.42e-06	3.22e-08	1.85e-08	7.03e-07	1.5e-06	NaN	1.13712	0.944904	0.0214506	0.0123428	0.468511	0.841387	0.0254943	1.23341	0.010007	1.11887	1.01631	0.887676	1.06447	0.360456	1.29977
VARN	2	14	114	114	1	2141VARN	017FP2	1.88289	1.8966	1.87626	1.68928	1.90023	5.36e-07	3.38e-07	2.73e-08	1.24e-09	2.57e-07	4.16e-07	NaN	1.28707	0.810495	0.0654496	0.00297651	0.616405	1.07709	0.0607654	0.291836	0.0101993	1.1308	1.13819	0.896035	0.904535	0.346238	1.78029
VARN	3	14	114	114	1	3141VARN	018FP1	1.87818	1.88808	1.8758	1.73444	1.88665	8.34e-07	3.03e-07	3.18e-08	5.68e-10	1.12e-06	5.01e-07	NaN	1.66463	0.603955	0.0634787	0.00113384	2.22801	0.884537	0.071765	0.115537	0.00981369	1.0584	1.57277	0.897426	0.672986	0.344665	6.46428
VARN	1	14	114	114	2	1142VARN	019FP2	1.90057	1.87824	1.87982	1.7141	1.89634	3.73e-07	5.72e-07	1.05e-08	1.38e-09	3.79e-07	4.52e-07	NaN	0.826318	1.26737	0.0232789	0.00305265	0.839443	1.10612	0.0210454	0.188318	0.0162101	0.95616	0.864204	1.05573	1.20047	0.363931	2.3066
VARN	2	14	114	114	2	2142VARN	020FP2	1.90785	1.89962	1.88201	1.68971	1.90013	6.92e-07	6.81e-07	3.53e-08	2.54e-09	5.75e-07	6.75e-07	NaN	1.0241	1.00911	0.0523301	0.00376718	0.851042	1.25034	0.0418528	0.3489	0.0107973	0.987811	1.03673	1.02211	0.987289	0.418299	2.03453
VARN	1	15	128	128	1	1151VARN	013FP1	1.89261	1.89846	1.88809	1.69849	1.89229	8.76e-07	1.79e-06	1.31e-08	9.1e-10	1.85e-06	1.23e-06	NaN	0.71205	1.45295	0.0106447	0.000739941	1.50618	1.31204	0.00811308	0.362568	0.00204083	1.60658	0.443207	0.981732	1.47999	0.553116	2.72309
VARN	2	15	128	128	1	2151VARN	014FP1	1.89092	1.8987	1.87583	1.68581	1.89428	1.22e-10	3.49e-10	6.37e-12	1.86e-09	6.28e-11	1.89e-10	Bad UBC	0.646429	1.84445	0.0336715	9.83448	0.331686	1.19098	NaN	NaN	NaN	NaN	NaN	NaN	NaN	NaN	NaN
VARN	3	15	128	128	1	3151VARN	015FP1	1.88579	1.88749	1.87612	1.70145	1.88913	7.33e-07	1.03e-06	1.09e-08	7.26e-10	6.61e-07	8.61e-07	NaN	0.851207	1.20067	0.0126522	0.000842756	0.767322	1.15935	0.0109131	0.301099	0.00279893	1.24228	0.685199	0.860931	1.39462	0.463419	1.65579
VARN	2	15	128	128	2	2152VARN	017FP3	1.87941	1.89809	1.85559	1.70262	1.89286	9.76e-07	4.96e-07	1.65e-08	1.09e-08	7.64e-07	6.89e-07	NaN	1.41746	0.719923	0.0240193	0.0158741	1.10993	1.42603	0.0168435	0.239244	0.0663512	1.16481	1.2169	0.874626	0.82312	0.398456	2.78558
VARN	3	15	128	128	2	3152VARN	018FP2	1.88126	1.88502	1.87016	1.68571	1.89438	3.01e-07	3.3e-07	4.66e-09	1.19e-09	2.94e-07	3.11e-07	NaN	0.968783	1.06136	0.0149755	0.00381148	0.944539	1.1424	0.0131088	0.29813	0.0127846	1.16813	0.829348	0.866349	1.22509	0.404033	2.33778
VARN	1	15	128	128	2	1152VARN	020FP3	1.8778	1.90697	1.86206	NaN	1.91182	1.2e-06	1.51e-06	2.89e-08	NaN	4.53e-07	1.32e-06	Missing values	0.908381	1.13995	0.021854	NaN	0.342105	1.48009	0.0147653	0.190239	NaN	1.2726	0.713801	0.79661	1.431	0.297273	1.15081
VARN	1	13	100	100	1	1131VARN	004FP3	1.87999	1.89718	1.86015	1.72219	1.88538	6.28e-06	5.73e-06	7.59e-07	8.9e-09	2.93e-06	5.94e-06	NaN	1.05645	0.9632	0.1276	0.00149704	0.492818	1.28987	0.0989243	0.179254	0.0083515	1.25463	0.842041	0.833748	1.15526	0.413129	1.19289
VARN	2	13	100	100	1	2131VARN	005FP1	1.87074	1.88866	1.86393	1.73025	1.87136	7.03e-07	1.11e-06	4.14e-07	7.32e-09	7.79e-07	8.72e-07	NaN	0.806418	1.27109	0.474772	0.00839425	0.893689	0.87872	0.540299	0.123899	0.0677509	0.989991	0.814571	1.01214	1.25584	0.335857	2.66092
VARN	3	13	100	100	1	3131VARN	005FP2	1.87738	1.895	1.87672	1.73259	1.86768	8.88e-07	1.08e-06	3.49e-07	2.15e-08	1.22e-06	9.73e-07	NaN	0.91264	1.11041	0.358335	0.0220503	1.25094	0.850419	0.421363	0.142996	0.154201	1.08724	0.83941	0.937791	1.18407	0.424808	2.94471
VARN	3	13	100	100	2	3132VARN	018FP2	1.88126	1.88502	1.87016	1.68571	1.89438	2.82e-07	3.72e-07	1.38e-07	3.13e-08	3.67e-07	3.22e-07	NaN	0.874631	1.15601	0.429674	0.0972567	1.14011	1.1424	0.376115	0.29813	0.326222	1.16813	0.748747	0.866349	1.33435	0.404033	2.82182
VARN	1	13	100	100	2	1132VARN	019FP3	1.89621	1.89562	1.88374	1.70489	1.9038	2.82e-07	4.51e-07	7.79e-08	3.01e-09	3.26e-07	3.53e-07	NaN	0.79696	1.27576	0.22033	0.00852383	0.922519	1.05274	0.209292	0.249768	0.034127	1.07757	0.739588	0.937987	1.3601	0.358514	2.57318
VARN	1	17	156	156	1	1171 VARN	T17 FP1	1.87875	1.87217	1.86863	1.69041	1.87207	5.53e-07	5.3e-07	2.55e-09	5.35e-09	1.5e-07	5.41e-07	NaN	1.02064	0.97978	0.0047145	0.0098849	0.276257	1.15354	0.004087	0.232756	0.042469	1.0991	0.928613	0.909836	1.07687	0.455106	0.607017
VARN	2	17	156	156	1	2171 VARN	T17 FP2	1.86756	1.86273	1.86623	1.68869	1.87493	8.35e-07	4.97e-07	6.64e-09	1.13e-09	2.12e-07	6.45e-07	NaN	1.29577	0.771743	0.0102987	0.00175398	0.329133	1.06957	0.00962881	0.222511	0.00788266	1.08395	1.19541	0.922548	0.836534	0.377291	0.872357
VARN	3	17	156	156	1	3171 VARN	T17 FP2	1.86756	1.86273	1.86623	1.68869	1.87493	1.96e-08	1.02e-08	2.36e-11	NaN	4.11e-09	1.42e-08	Bad UBC	1.38238	0.723388	0.00166577	NaN	0.28992	1.06957	NaN	NaN	NaN	NaN	NaN	NaN	NaN	NaN	NaN
VARN	1	17	156	156	2	1172 VARN	T17 FP3	1.87141	1.85894	1.87842	1.70743	1.8995	1.43e-08	1.4e-08	7.67e-11	NaN	3.36e-09	1.41e-08	Bad UBC	1.01166	0.988473	0.00542687	NaN	0.238183	0.995003	NaN	NaN	NaN	NaN	NaN	NaN	NaN	NaN	NaN
VARN	2	17	156	156	2	2172 VARN	T17 FP4	1.88299	1.87427	1.85002	1.70246	1.88145	1.36e-06	9.04e-07	4.98e-09	NaN	3.4e-07	1.11e-06	Bad UBC	1.22582	0.815778	0.00448815	NaN	0.306926	1.50587	NaN	NaN	NaN	NaN	NaN	NaN	NaN	NaN	NaN
VARN	3	17	156	156	2	3172 VARN	T17 FP4	1.88299	1.87427	1.85002	1.70246	1.88145	1.34e-06	7.12e-07	2.25e-09	1.06e-09	1.87e-07	9.77e-07	NaN	1.37186	0.728935	0.00230523	0.00108244	0.191084	1.50587	0.00153083	0.211762	0.00511159	1.01314	1.35408	0.987035	0.73851	0.357668	0.53425
VARN	22	22C 13WT10	110	100	1	13WT10221VARN	006FP1	1.87535	1.8943	1.86145	1.71724	1.85957	1.19e-06	9.51e-07	3.49e-08	3.78e-09	1.5e-08	1.05e-06	NaN	1.13859	0.907524	0.0332997	0.00360658	0.0143248	1.07759	0.030902	0.164461	0.0219298	1.2976	0.877462	0.810554	1.11964	0.573216	0.0249902
VARN	22	22C 8WT10	75	65	2	8WT10222VARN	005FP2	1.87738	1.895	1.87672	1.73259	1.86768	1.71e-07	2.89e-07	1.56e-07	7.81e-09	5.11e-10	2.18e-07	NaN	0.78517	1.32809	0.714226	0.0358727	0.00234688	0.850419	0.839851	0.142996	0.250864	1.08724	0.722169	0.937791	1.41619	0.424808	0.00552457
VARN	22	22C 8WT10	75	65	1	8WT10221VARN	005FP3	1.86287	1.89244	1.86343	1.73985	1.84872	2.56e-07	2.15e-07	1.03e-07	4.96e-09	5.88e-10	2.3e-07	NaN	1.11531	0.934433	0.447703	0.0215593	0.00255683	0.90024	0.497315	0.110318	0.195428	1.19392	0.934156	0.864443	1.08097	0.476702	0.00536358
VARN	22	22C 8WT10	75	65	3	8WT10223VARN	006FP1	1.87535	1.8943	1.86145	1.71724	1.85957	1.85e-07	2.02e-07	3.68e-07	1.94e-08	2.12e-08	1.93e-07	NaN	0.958696	1.04909	1.90884	0.100744	0.109655	1.07759	1.7714	0.164461	0.612572	1.2976	0.738825	0.810554	1.29429	0.573216	0.191298
VARN	1	3	23	23	1	131VARN	001FP3	1.88776	1.90249	1.88946	1.76783	1.87991	5.84e-07	2.9e-07	1.22e-06	4.12e-08	2.71e-09	4.06e-07	NaN	1.43814	0.714822	3.0121	0.101477	0.00667467	0.906749	3.32187	0.0776456	1.30692	1.09732	1.3106	0.95644	0.747377	0.455825	0.0146431
VARN	2	3	23	23	1	231VARN	002FP1	1.87608	1.89537	1.88205	1.72199	1.8543	2.2e-07	2.92e-07	1.11e-06	9.14e-08	2.79e-09	2.52e-07	NaN	0.871734	1.15879	4.39592	0.362442	0.0110765	0.75207	5.84509	0.1661	2.18207	1.07309	0.81236	0.946048	1.22488	0.564559	0.0196197
VARN	3	3	23	23	1	331VARN	002FP2	1.87118	1.89254	1.89011	1.72422	1.87263	1.06e-07	1.57e-07	4.56e-07	4.53e-08	5.38e-10	1.25e-07	NaN	0.845632	1.25433	3.6351	0.361441	0.00428484	0.715707	5.07903	0.162288	2.22715	1.26694	0.667462	0.833998	1.50399	0.456103	0.00939446
VARN	3	3	23	23	2	332VARN	009FP3	1.87988	1.88296	1.87016	1.71813	1.87523	6.66e-07	3.75e-07	2.06e-06	1.54e-07	1.96e-09	4.96e-07	NaN	1.34267	0.757355	4.15198	0.310566	0.00395672	0.972884	4.26771	0.13649	2.27537	0.935877	1.43467	1.08637	0.697143	0.321839	0.0122941
VARN	1	3	23	23	2	132VARN	011FP2	1.88374	1.88426	1.87076	1.72274	1.86785	1.34e-06	8.97e-07	1.91e-06	1.99e-07	4.07e-08	1.09e-06	NaN	1.23072	0.826673	1.76239	0.18309	0.0374913	0.937812	1.87926	0.148047	1.2367	1.08108	1.13842	0.96236	0.859007	0.411209	0.0911735
VARN	2	3	23	23	2	232VARN	012FP2	1.88245	1.87766	1.86989	1.71715	1.85858	9.68e-07	5.82e-07	2.69e-06	1.55e-07	3.41e-09	7.48e-07	NaN	1.29502	0.778641	3.60116	0.206652	0.00455825	0.81933	4.39526	0.130602	1.5823	0.892982	1.45022	1.13319	0.687121	0.43295	0.0105284
VARN	8	8C 13WT10	90	100	1	13WT1081VARN	010FP3	1.88543	1.88372	1.85925	1.72716	1.86435	4.79e-07	3.76e-07	4e-08	9.69e-10	2.36e-07	4.2e-07	NaN	1.14108	0.895245	0.0952895	0.0023085	0.563073	1.19145	0.0799779	0.168392	0.0137091	0.997579	1.14385	1.08388	0.825964	0.54746	1.02852
VARN	8	8C 13WT10	90	100	2	13WT1082VARN	011FP3	1.88881	1.88016	1.85109	1.72167	1.88629	1.36e-06	2.81e-06	8.92e-08	2.17e-09	4.61e-07	1.91e-06	NaN	0.711855	1.46936	0.0467167	0.00113708	0.241166	1.26525	0.0369228	0.146125	0.00778152	1.02585	0.693916	1.00505	1.46198	0.359094	0.671595
VARN	8	8C 13WT10	90	100	3	13WT1083VARN	012FP3	1.8895	1.90192	1.85731	1.72452	1.89094	1.22e-06	9.06e-07	9.15e-08	4.78e-09	4.54e-07	1.04e-06	NaN	1.16859	0.869156	0.0877855	0.00458492	0.435413	1.17866	0.0744789	0.176063	0.0260414	1.0656	1.09665	0.963561	0.902025	0.358734	1.21375
VARN	8	8C 8WT10	55	65	1	B9	003 007 FP3	1.5135	1.2735	1.3425	1.452	1.524	5.59e-07	6.95e-07	6.16e-07	4.59e-08	4.96e-07	6.23e-07	NaN	0.8972	1.11458	0.98883	0.073605	0.795374	1.12769	0.876867	0.261795	0.281155	1.31456	0.682509	0.76071	1.46518	0.481903	1.65049
VARN	8	8C 8WT10	55	65	2	C6	007 008 FP2	2.123	2.1085	2.249	1.432	2.421	3.52e-07	8.28e-07	4.97e-07	9.98e-09	5.08e-07	5.39e-07	NaN	0.651707	1.53443	0.920665	0.0185031	0.94197	0.892497	1.03156	0.051175	0.361565	1.01475	0.642237	0.985468	1.55706	0.362457	2.59885
VARN	8	8C 8WT10	55	65	3	8WT1083VARN	009FP3	1.87988	1.88296	1.87016	1.71813	1.87523	7.86e-07	1.04e-06	6.59e-07	8.15e-08	7.54e-07	9.06e-07	NaN	0.867953	1.15356	0.727924	0.0900281	0.833003	0.972884	0.748213	0.13649	0.659594	0.935877	0.927423	1.08637	1.06185	0.321839	2.58826
VIN3	2	1	9	9	1	C8	003 007 FP2	2.123	2.1085	2.249	1.432	2.421	NaN	4.01e-08	3.69e-08	5.9e-09	1.44e-11	NaN	NaN	NaN	NaN	NaN	NaN	NaN	0.892497	NaN	0.051175	NaN	1.01475	NaN	0.985468	NaN	0.362457	NaN
VIN3	1	1	9	9	1	111VIN3	006FP2	NaN	1.89284	1.87491	1.75695	1.87568	NaN	2e-08	2.71e-09	3.39e-09	3.41e-10	1.99e-08	Bad UBC, order of magnitude (FLC)	NaN	1.00327	0.136314	0.170644	0.0171429	NaN	NaN	NaN	NaN	NaN	NaN	NaN	NaN	NaN	NaN
VIN3	1	1	9	9	2	112VIN3	009FP1	1.868	1.8849	1.87638	1.74067	1.84771	1.31e-07	1.3e-07	1.72e-07	2.33e-08	8.87e-10	1.29e-07	NaN	1.01131	1.00382	1.33354	0.180382	0.00686452	0.841732	1.58428	0.0920425	1.95977	1.08201	0.934652	0.963693	1.04163	0.507846	0.0135169
VIN3	2	1	9	9	2	212VIN3	010FP1	1.8647	1.8809	1.87955	1.72822	1.85484	3.59e-08	5.06e-08	1.04e-07	4e-08	3.56e-10	4.26e-08	NaN	0.842085	1.18766	2.43511	0.938628	0.0083554	0.714524	3.40802	0.110966	8.45869	1.045	0.805823	1.0011	1.18636	0.484065	0.0172609
VIN3	3	1	9	9	2	312VIN3	011FP1	1.875	1.88906	1.8814	1.72278	1.84935	1.95e-08	3.44e-08	5.25e-08	2.28e-08	2.72e-10	2.56e-08	NaN	0.764055	1.34459	2.05408	0.891342	0.0106437	0.780389	2.63213	0.143972	6.19106	1.28092	0.59649	0.830475	1.61906	0.596948	0.0178302
VIN3	1	2	16	16	1	121VIN3	001FP1	1.86774	1.90213	1.87451	1.71119	1.84445	4.22e-07	2.85e-07	6.11e-07	8.45e-08	1.48e-09	3.42e-07	NaN	1.23521	0.833789	1.78767	0.24728	0.00432253	0.880708	2.02981	0.192921	1.28177	1.13909	1.08439	0.889496	0.937372	0.67031	0.00644855
VIN3	2	2	16	16	1	221VIN3	001FP1	1.86774	1.90213	1.87451	1.71119	1.84445	3.46e-07	2.31e-07	5.51e-07	5.1e-08	7.68e-10	2.78e-07	NaN	1.24428	0.832125	1.98249	0.183704	0.0027666	0.880708	2.25102	0.192921	0.952223	1.13909	1.09235	0.889496	0.935501	0.67031	0.00412734
VIN3	3	2	16	16	1	321VIN3	001FP2	1.86641	1.8869	1.86963	1.74128	1.85735	2.55e-07	2.9e-07	4.12e-07	2.85e-08	7.68e-10	2.71e-07	NaN	0.940877	1.06921	1.52224	0.105151	0.0028355	0.82159	1.8528	0.0913827	1.15067	1.17879	0.798174	0.907243	1.17852	0.492102	0.005762
VIN3	2	2	16	16	2	222VIN3	009FP1	1.868	1.8849	1.87638	1.74067	1.84771	8.42e-07	4.59e-07	5.72e-07	9.44e-08	1.62e-09	6.12e-07	NaN	1.3767	0.749618	0.935258	0.154332	0.00265027	0.841732	1.11111	0.0920425	1.67674	1.08201	1.27235	0.963693	0.77786	0.507846	0.00521865
VIN3	3	2	16	16	2	322VIN3	010FP1	1.8647	1.8809	1.87955	1.72822	1.85484	6.96e-07	3.02e-07	8.18e-07	1.26e-07	1.95e-09	4.58e-07	NaN	1.51748	0.65967	1.78436	0.274758	0.00424901	0.714524	2.49727	0.110966	2.47606	1.045	1.45214	1.0011	0.658943	0.484065	0.00877776
VIN3	1	2	16	16	2	122VIN3	012FP1	1.88099	1.89659	1.87632	1.72076	1.85176	9.44e-08	4.75e-08	1.44e-07	3.81e-08	4.77e-10	6.67e-08	NaN	1.41396	0.71219	2.15722	0.570701	0.00715528	0.784247	2.7507	0.146598	3.89296	1.05045	1.34605	0.966884	0.736583	0.531422	0.0134644
VIN3	1	4	30	30	1	B1	021-032 VIN3 FP1	1.904	1.907	1.891	1.745	1.848	3.66e-07	3.47e-07	6.05e-07	7.23e-08	1.07e-09	3.56e-07	NaN	1.02674	0.973961	1.69864	0.2031	0.00299549	1.02211	1.6619	0.160254	1.26736	1.00984	1.01673	0.990258	0.983543	0.893263	0.00335343
VIN3	1	4	30	30	2	B4	021-032 VIN3 FP1	1.904	1.907	1.891	1.745	1.848	1.87e-06	6.02e-07	1.31e-06	1.02e-07	2.58e-09	1.06e-06	NaN	1.76134	0.567751	1.2314	0.0966663	0.00243593	1.02211	1.20477	0.160254	0.603206	1.00984	1.74418	0.990258	0.573336	0.893263	0.002727
VIN3	2	4	30	30	1	E1	021-032 VIN3 FP1	1.904	1.907	1.891	1.745	1.848	1.24e-06	2.06e-07	1.56e-06	1.97e-07	2.66e-09	5.07e-07	NaN	2.45378	0.407535	3.07884	0.388397	0.00524912	1.02211	3.01225	0.160254	2.42363	1.00984	2.42987	0.990258	0.411545	0.893263	0.00587635
VIN3	2	4	30	30	2	E4	021-032 VIN3 FP1	1.904	1.907	1.891	1.745	1.848	2.22e-06	4.48e-07	1.24e-06	1.86e-07	3.71e-09	9.98e-07	NaN	2.22864	0.448705	1.24459	0.186571	0.0037157	1.02211	1.21768	0.160254	1.16422	1.00984	2.20692	0.990258	0.45312	0.893263	0.00415969
VIN3	3	4	30	30	1	H1	021-032 VIN3 FP1	1.904	1.907	1.891	1.745	1.848	NaN	1.58e-13	NaN	NaN	4.89e-10	NaN	Bad UBC	NaN	NaN	NaN	NaN	NaN	1.02211	NaN	0.160254	NaN	1.00984	NaN	0.990258	NaN	0.893263	NaN
VIN3	3	4	30	30	2	H4	021-032 VIN3 FP1	1.904	1.907	1.891	1.745	1.848	1.36e-06	3.94e-07	8.96e-07	4.83e-08	1.4e-09	7.33e-07	NaN	1.85918	0.537871	1.22312	0.0659802	0.00191316	1.02211	1.19667	0.160254	0.411722	1.00984	1.84107	0.990258	0.543162	0.893263	0.00214176
VIN3	1	5	37	37	1	151VIN3	002FP2	1.87118	1.89254	1.89011	1.72422	1.87263	3.84e-07	3.05e-07	2.76e-07	5.08e-08	6.04e-10	3.39e-07	NaN	1.13298	0.900121	0.813115	0.149808	0.00178242	0.715707	1.1361	0.162288	0.923097	1.26694	0.894264	0.833998	1.07928	0.456103	0.00390795
VIN3	3	5	37	37	1	251VIN3	002FP3	1.88057	1.90335	1.89829	1.7732	1.88871	2.71e-07	2.85e-07	2.46e-07	2.5e-08	1.96e-10	2.73e-07	NaN	0.994305	1.04415	0.901425	0.0918491	0.00071877	0.69207	1.3025	0.0619552	1.48251	1.04029	0.955796	0.981386	1.06395	0.33273	0.00216022
VIN3	2	5	37	37	1	F2	003 007 FP1	1.87329	1.89506	1.87916	1.73378	1.87786	3.67e-07	4.59e-07	4.52e-07	9.45e-08	1.12e-09	4.11e-07	NaN	0.894429	1.11803	1.09983	0.230054	0.00273291	0.982724	1.11916	0.181607	1.26677	1.17757	0.759555	0.849207	1.31656	0.514649	0.00531024
VIN3	1	5	37	37	2	152VIN3	010FP2	1.87255	1.89381	1.86992	1.73219	1.84777	5.64e-07	6.81e-07	1.73e-06	9.99e-08	1.71e-09	6.05e-07	NaN	0.931915	1.12617	2.86408	0.165236	0.00282615	1.44712	1.97916	0.202229	0.817077	1.71879	0.542193	0.645878	1.74362	0.919584	0.00307329
VIN3	3	5	37	37	2	252VIN3	011FP3	1.88881	1.88016	1.85109	1.72167	1.88629	1.51e-06	8.14e-07	1.46e-06	1.7e-07	1.18e-09	1.1e-06	NaN	1.36471	0.738309	1.32325	0.153745	0.00106579	1.26525	1.04584	0.146125	1.05215	1.02585	1.33032	1.00505	0.734597	0.359094	0.00296799
VIN3	3	6	44	44	1	C2	021-032 VIN3 FP1	1.904	1.907	1.891	1.745	1.848	2.4e-06	2.35e-07	7.98e-07	1.08e-07	2.44e-09	7.5e-07	NaN	3.19645	0.312847	1.06452	0.144359	0.00325568	1.02211	1.04149	0.160254	0.900813	1.00984	3.16531	0.990258	0.315925	0.893263	0.00364471
VIN3	1	6	44	44	1	D1	021-032 VIN3 FP1	1.904	1.907	1.891	1.745	1.848	1.25e-06	4.3e-07	1.44e-06	1.1e-07	2.63e-09	7.34e-07	NaN	1.70805	0.585464	1.95522	0.14988	0.00358357	1.02211	1.91293	0.160254	0.935266	1.00984	1.69141	0.990258	0.591224	0.893263	0.00401178
VIN3	1	6	44	44	2	D4	021-032 VIN3 FP1	1.904	1.907	1.891	1.745	1.848	2.54e-06	5.44e-07	7.77e-07	1.12e-07	6.11e-09	1.18e-06	NaN	2.16078	0.462796	0.66005	0.0953081	0.00519241	1.02211	0.645774	0.160254	0.594731	1.00984	2.13973	0.990258	0.46735	0.893263	0.00581286
VIN3	2	6	44	44	1	G1	021-032 VIN3 FP1	1.904	1.907	1.891	1.745	1.848	1.66e-06	1.97e-07	1.03e-06	1.51e-07	4.99e-09	5.73e-07	NaN	2.90268	0.34451	1.79133	0.263425	0.00872256	1.02211	1.75259	0.160254	1.64379	1.00984	2.8744	0.990258	0.347899	0.893263	0.00976484
VIN3	2	6	44	44	2	G4	021-032 VIN3 FP1	1.904	1.907	1.891	1.745	1.848	1.76e-06	4.18e-07	7.76e-07	1.06e-07	2.33e-09	8.59e-07	NaN	2.05261	0.487185	0.904424	0.123918	0.00271641	1.02211	0.884862	0.160254	0.77326	1.00984	2.03261	0.990258	0.491978	0.893263	0.003041
VIN3	3	6	44	44	2	C5	021-032 VIN3 FP2	1.883	1.889	1.884	1.756	1.844	3.22e-06	4.6e-07	1.39e-06	1.35e-07	5.45e-09	1.22e-06	NaN	2.64817	0.377619	1.13806	0.110861	0.00447398	0.800969	1.42085	0.108844	1.01853	1.07116	2.47224	0.933564	0.404492	0.582075	0.00768626
VIN3	2	7	51	51	1	C4	003 007 FP1	1.87329	1.89506	1.87916	1.73378	1.87786	2.67e-08	7.96e-08	6.67e-08	9.09e-09	4.17e-10	4.61e-08	NaN	0.57886	1.72753	1.44715	0.197238	0.00905919	0.982724	1.47259	0.181607	1.08607	1.17757	0.491573	0.849207	2.03429	0.514649	0.0176027
VIN3	3	7	51	51	2	372VIN3	016FP7	1.89644	1.88728	1.89109	1.70604	NaN	3.87e-07	5.03e-07	4.51e-07	5.89e-08	NaN	4.34e-07	Missing values	0.891249	1.15976	1.03963	0.135815	NaN	0.661754	1.57102	0.145177	0.935511	0.87103	1.02321	1.21042	0.958147	0.287181	NaN
VIN3	1	7	51	51	2	172VIN3	019FP2	1.90057	1.87824	1.87982	1.7141	1.89634	8.55e-07	9.89e-07	8.24e-07	2.33e-07	2.47e-09	8.96e-07	NaN	0.954442	1.10401	0.919448	0.260363	0.00275667	1.10612	0.831234	0.188318	1.38257	0.95616	0.998203	1.05573	1.04573	0.363931	0.00757471
VIN3	2	7	51	51	2	272VIN3	020FP7	1.88258	1.90751	1.90077	1.72032	1.92048	6.03e-07	6.31e-07	5.68e-07	5.86e-08	4.51e-10	6.1e-07	NaN	0.989195	1.03559	0.932093	0.0961169	0.000739945	0.865621	1.07679	0.176728	0.543869	1.16944	0.845872	0.858029	1.20694	0.291904	0.00253489
VIN3	1	8	58	58	1	D2	021-032 VIN3 FP1	1.904	1.907	1.891	1.745	1.848	1.62e-06	2.87e-07	8.35e-07	6.42e-08	4.75e-09	6.81e-07	NaN	2.37076	0.421805	1.22577	0.0942917	0.00697145	1.02211	1.19926	0.160254	0.588388	1.00984	2.34767	0.990258	0.425955	0.893263	0.00780448
VIN3	3	8	58	58	1	E3	021-032 VIN3 FP1	1.904	1.907	1.891	1.745	1.848	1.07e-06	1.92e-07	4.01e-07	2.21e-08	5.95e-09	4.53e-07	NaN	2.36322	0.423151	0.884682	0.0488268	0.0131496	1.02211	0.865548	0.160254	0.304683	1.00984	2.3402	0.990258	0.427314	0.893263	0.0147209
VIN3	2	8	58	58	1	H2	021-032 VIN3 FP1	1.904	1.907	1.891	1.745	1.848	NaN	2.71e-12	NaN	2.63e-09	9.59e-11	NaN	Bad UBC	NaN	NaN	NaN	NaN	NaN	1.02211	NaN	0.160254	NaN	1.00984	NaN	0.990258	NaN	0.893263	NaN
VIN3	2	8	58	58	2	D5	021-032 VIN3 FP2	1.883	1.889	1.884	1.756	1.844	2.44e-06	3.13e-07	9.52e-07	7.7e-08	5.32e-09	8.73e-07	NaN	2.79227	0.358131	1.09102	0.0881654	0.00608974	0.800969	1.36213	0.108844	0.810018	1.07116	2.60677	0.933564	0.383617	0.582075	0.0104621
VIN3	3	8	58	58	2	G6	021-032 VIN3 FP2	1.883	1.889	1.884	1.756	1.844	2.37e-06	6.57e-07	1.96e-06	1.28e-07	2.91e-09	1.25e-06	NaN	1.90184	0.525806	1.56881	0.102203	0.00232761	0.800969	1.95863	0.108844	0.938987	1.07116	1.77549	0.933564	0.563224	0.582075	0.00399881
VIN3	1	8	58	58	2	H5	021-032 VIN3 FP2	1.883	1.889	1.884	1.756	1.844	NaN	NaN	NaN	NaN	5.5e-10	NaN	NaN	NaN	NaN	NaN	NaN	NaN	0.800969	NaN	0.108844	NaN	1.07116	NaN	0.933564	NaN	0.582075	NaN
VIN3	1	9	65	65	1	191VIN3	004FP1	1.86813	1.89054	1.87135	1.70021	1.87385	3.67e-07	4.5e-07	3.26e-07	3.62e-08	3.79e-09	4.01e-07	NaN	0.914556	1.12148	0.812671	0.0901476	0.00944634	0.876494	0.927184	0.227034	0.397066	1.11778	0.818192	0.921858	1.21654	0.389836	0.0242316
VIN3	2	9	65	65	1	291VIN3	004FP1	1.86813	1.89054	1.87135	1.70021	1.87385	5.29e-07	5.72e-07	4.88e-07	7.34e-08	8.97e-10	5.46e-07	NaN	0.969423	1.04898	0.895238	0.134579	0.00164469	0.876494	1.02139	0.227034	0.592769	1.11778	0.867278	0.921858	1.1379	0.389836	0.00421893
VIN3	3	9	65	65	1	391VIN3	004FP3	1.87999	1.89718	1.86015	1.72219	1.88538	5.77e-07	4.39e-07	4.53e-07	3.51e-08	6.16e-10	4.84e-07	NaN	1.19375	0.907042	0.93705	0.0725831	0.00127447	1.28987	0.726466	0.179254	0.404918	1.25463	0.951476	0.833748	1.08791	0.413129	0.00308493
VIN3	3	9	65	65	2	392VIN3	014FP7	1.88408	1.91267	1.90425	1.70712	1.89464	5.6e-07	2.18e-07	4.1e-07	5.54e-08	1.59e-09	3.49e-07	NaN	1.60544	0.624857	1.17627	0.158794	0.00455248	0.861562	1.36528	0.237721	0.667984	1.19512	1.34333	0.839336	0.744467	0.436104	0.010439
VIN3	2	9	65	65	2	292VIN3	015FP2	1.90353	1.89417	1.87892	1.71913	1.89298	4.24e-07	4.02e-07	4.28e-07	5.94e-08	7.35e-10	4.05e-07	NaN	1.04824	0.99394	1.05741	0.146703	0.00181641	1.04908	1.00795	0.205684	0.713244	1.0516	0.996807	0.968382	1.02639	0.366226	0.00495979
VIN3	2	10	72	72	1	C3	021-032 VIN3 FP1	1.904	1.907	1.891	1.745	1.848	1.96e-06	3.25e-07	5.75e-07	5.79e-08	5.7e-09	7.99e-07	NaN	2.45726	0.406958	0.719991	0.07247	0.00712665	1.02211	0.704418	0.160254	0.452219	1.00984	2.43332	0.990258	0.410962	0.893263	0.00797822
VIN3	1	10	72	72	1	F2	021-032 VIN3 FP1	1.904	1.907	1.891	1.745	1.848	3.44e-06	9.28e-07	1.6e-06	1.39e-07	1.03e-08	1.79e-06	NaN	1.92525	0.519413	0.898322	0.0780169	0.00577981	1.02211	0.878892	0.160254	0.486832	1.00984	1.90649	0.990258	0.524523	0.893263	0.00647045
VIN3	3	10	72	72	1	H3	021-032 VIN3 FP1	1.904	1.907	1.891	1.745	1.848	1.77e-06	5.72e-07	9.22e-07	4.51e-08	4.73e-09	1.01e-06	NaN	1.7618	0.567601	0.91516	0.0447562	0.00469416	1.02211	0.895367	0.160254	0.279283	1.00984	1.74464	0.990258	0.573185	0.893263	0.00525507
VIN3	1	10	72	72	2	C6	021-032 VIN3 FP2	1.883	1.889	1.884	1.756	1.844	2.09e-06	2.83e-07	6.31e-07	3.03e-08	6.51e-09	7.7e-07	NaN	2.71765	0.367965	0.818882	0.0393395	0.00845748	0.800969	1.02236	0.108844	0.36143	1.07116	2.5371	0.933564	0.394151	0.582075	0.0145299
VIN3	2	10	72	72	2	F6	021-032 VIN3 FP2	1.883	1.889	1.884	1.756	1.844	3.21e-06	3.78e-07	7.08e-07	6.55e-08	5.61e-09	1.1e-06	NaN	2.91452	0.343109	0.643066	0.0594347	0.00509182	0.800969	0.80286	0.108844	0.546055	1.07116	2.72089	0.933564	0.367526	0.582075	0.00874771
VIN3	3	10	72	72	2	G5	021-032 VIN3 FP2	1.883	1.889	1.884	1.756	1.844	3.51e-06	8.61e-07	1.37e-06	4.6e-08	3.68e-08	1.74e-06	NaN	2.01781	0.495587	0.786849	0.0264793	0.0211893	0.800969	0.982371	0.108844	0.243278	1.07116	1.88375	0.933564	0.530855	0.582075	0.036403
VIN3	1	11	79	79	1	1111VIN3	006FP3	1.87135	1.88785	1.86674	1.72318	1.88094	1.37e-06	1.92e-06	1.12e-06	2.25e-07	2.53e-09	1.57e-06	NaN	0.874901	1.22085	0.714557	0.1437	0.00161452	2.43184	0.293834	0.367617	0.390895	3.40765	0.256746	1.5644	0.780393	1.03782	0.00155567
VIN3	3	11	79	79	1	E3	007 008 FP4	1.766	2.023	2.023	1.205	2.5	9.75e-08	1.55e-07	6.71e-08	8.51e-09	1.46e-09	1.23e-07	NaN	0.794503	1.25865	0.546711	0.0692779	0.0118805	0.915093	0.597438	0.0815395	0.849625	0.901006	0.881795	1.10987	1.13405	0.46306	0.0256565
VIN3	3	11	79	79	2	3112VIN3	014FP4	1.87992	1.91971	1.87856	1.70837	1.88699	2.02e-06	1.3e-06	7.7e-07	1.75e-07	3.67e-09	1.56e-06	NaN	1.29385	0.832645	0.492143	0.111669	0.00234336	1.09719	0.448549	0.241073	0.463217	1.21167	1.06783	0.869193	0.957953	0.360863	0.00649376
VIN3	2	11	79	79	2	2112VIN3	015FP3	1.89281	1.89762	1.89592	1.71722	1.92113	9.84e-07	1.45e-06	4.69e-07	7.12e-08	1.79e-09	1.18e-06	NaN	0.834902	1.23117	0.397971	0.0604245	0.00151676	0.898213	0.443069	0.195903	0.308441	1.17831	0.708557	0.874314	1.40816	0.28899	0.00524846
VIN3	3	12	86	86	1	B2	021-032 VIN3 FP1	1.904	1.907	1.891	1.745	1.848	2.58e-06	2.67e-07	5.5e-07	5.72e-08	2.52e-09	8.31e-07	NaN	3.1078	0.321771	0.661401	0.0688006	0.00303514	1.02211	0.647096	0.160254	0.429322	1.00984	3.07752	0.990258	0.324937	0.893263	0.00339781
VIN3	1	12	86	86	1	C1	021-032 VIN3 FP1	1.904	1.907	1.891	1.745	1.848	1.3e-06	5.6e-07	1.01e-06	8.1e-08	3.38e-09	8.52e-07	NaN	1.52334	0.65645	1.18607	0.0950043	0.00396404	1.02211	1.16042	0.160254	0.592835	1.00984	1.5085	0.990258	0.662909	0.893263	0.00443771
VIN3	1	12	86	86	2	C4	021-032 VIN3 FP1	1.904	1.907	1.891	1.745	1.848	2.22e-06	4.99e-07	7.04e-07	5.32e-08	3.6e-09	1.05e-06	NaN	2.10715	0.474576	0.669313	0.0506069	0.00341902	1.02211	0.654837	0.160254	0.315791	1.00984	2.08662	0.990258	0.479245	0.893263	0.00382757
VIN3	2	12	86	86	1	F1	021-032 VIN3 FP1	1.904	1.907	1.891	1.745	1.848	9.56e-07	2.74e-07	7.69e-07	7.61e-08	3.94e-09	5.11e-07	NaN	1.86866	0.535142	1.50307	0.148915	0.00769784	1.02211	1.47056	0.160254	0.929239	1.00984	1.85046	0.990258	0.540406	0.893263	0.00861766
VIN3	2	12	86	86	2	F4	021-032 VIN3 FP1	1.904	1.907	1.891	1.745	1.848	2.24e-06	4.31e-07	6.92e-07	1.42e-07	4.71e-09	9.83e-07	NaN	2.28069	0.438463	0.703456	0.144035	0.00479041	1.02211	0.688241	0.160254	0.898792	1.00984	2.25847	0.990258	0.442777	0.893263	0.00536282
VIN3	3	12	86	86	2	B5	021-032 VIN3 FP2	1.883	1.889	1.884	1.756	1.844	3.25e-06	5.44e-07	1.06e-06	7e-08	4.35e-09	1.33e-06	NaN	2.44493	0.409009	0.793326	0.0525844	0.00326657	0.800969	0.990457	0.108844	0.483118	1.07116	2.2825	0.933564	0.438116	0.582075	0.00561194
VIN3	3	14	114	114	2	3142VIN3	015FP2	1.90353	1.89417	1.87892	1.71913	1.89298	3.45e-07	8.8e-07	3.26e-07	3.01e-08	2.39e-09	5.38e-07	NaN	0.640057	1.6356	0.605184	0.0558267	0.00443107	1.04908	0.576872	0.205684	0.27142	1.0516	0.608652	0.968382	1.68901	0.366226	0.0120993
VIN3	1	14	114	114	1	1141VIN3	016FP6	1.8662	1.90549	1.89735	1.72908	1.88794	1.34e-06	5.06e-07	1.23e-07	1.43e-08	6.88e-09	7.97e-07	NaN	1.68426	0.635019	0.154725	0.0179945	0.00862899	0.773496	0.200033	0.122447	0.146957	1.33059	1.2658	0.748278	0.84864	0.401535	0.02149
VIN3	2	14	114	114	1	2141VIN3	017FP1	1.87546	1.88935	1.87213	1.69524	1.8794	3.76e-07	7.58e-07	2.63e-07	1.54e-08	1.47e-09	5.27e-07	NaN	0.713967	1.43821	0.499088	0.0292676	0.00279351	1.0257	0.486584	0.246117	0.118917	1.18187	0.604097	0.843762	1.70452	0.443765	0.00629502
VIN3	3	14	114	114	1	3141VIN3	018FP1	1.87818	1.88808	1.8758	1.73444	1.88665	1.14e-06	1e-06	5.19e-07	4.06e-08	3.7e-09	1.06e-06	NaN	1.0731	0.942936	0.487153	0.0381523	0.00347215	0.884537	0.550744	0.115537	0.330217	1.0584	1.01388	0.897426	1.05071	0.344665	0.010074
VIN3	1	14	114	114	2	1142VIN3	019FP3	1.89621	1.89562	1.88374	1.70489	1.9038	8.11e-07	1.11e-06	3.04e-07	1.37e-07	2.38e-09	9.38e-07	NaN	0.864505	1.18634	0.323854	0.146063	0.00253722	1.05274	0.30763	0.249768	0.584796	1.07757	0.80227	0.937987	1.26477	0.358514	0.00707705
VIN3	2	14	114	114	2	2142VIN3	020FP2	1.90785	1.89962	1.88201	1.68971	1.90013	8.27e-07	8.14e-07	2.65e-07	3.34e-08	2.15e-09	8.07e-07	NaN	1.02434	1.00778	0.327619	0.0413887	0.00266558	1.25034	0.262025	0.3489	0.118626	0.987811	1.03698	1.02211	0.985985	0.418299	0.00637244
VIN3	1	15	128	128	1	1151VIN3	013FP1	1.89261	1.89846	1.88809	1.69849	1.89229	8.79e-07	1.74e-06	1.76e-07	4.2e-08	1.86e-06	1.23e-06	Contaminated? High VIN3	0.716598	1.42199	0.143306	0.0342555	1.51704	1.31204	NaN	NaN	NaN	NaN	NaN	NaN	NaN	NaN	NaN
VIN3	2	15	128	128	1	2151VIN3	014FP1	1.89092	1.8987	1.87583	1.68581	1.89428	1.07e-06	7.19e-07	1.77e-07	4.88e-08	3.61e-09	8.62e-07	NaN	1.23825	0.834116	0.205068	0.0566294	0.00418443	1.19098	0.172185	0.405493	0.139656	1.29674	0.95489	0.844208	0.988045	0.417674	0.0100184
VIN3	3	15	128	128	1	3151VIN3	015FP1	1.88579	1.88749	1.87612	1.70145	1.88913	1.24e-06	1.1e-06	3e-07	5.33e-08	1.9e-09	1.13e-06	NaN	1.09812	0.976518	0.26497	0.0471196	0.00167777	1.15935	0.22855	0.301099	0.156492	1.24228	0.88396	0.860931	1.13426	0.463419	0.00362042
VIN3	2	15	128	128	2	2152VIN3	017FP3	1.87941	1.89809	1.85559	NaN	1.89286	2.96e-07	5.27e-07	1.7e-07	NaN	2.29e-09	3.87e-07	Missing values	0.764258	1.36052	0.439385	NaN	0.005911	1.42603	0.308118	0.239244	NaN	1.16481	0.656123	0.874626	1.55554	0.398456	0.0148348
VIN3	3	15	128	128	2	3152VIN3	018FP2	1.88126	1.88502	1.87016	1.68571	1.89438	1.61e-07	1.95e-07	8.05e-08	1.42e-08	5.91e-10	1.75e-07	NaN	0.916647	1.11089	0.458599	0.0809497	0.00336533	1.1424	0.401435	0.29813	0.271525	1.16813	0.784716	0.866349	1.28226	0.404033	0.00832933
VIN3	1	15	128	128	2	1152VIN3	020FP3	1.8778	1.90697	1.86206	1.71413	1.91182	1.08e-06	6.25e-07	2.85e-07	3.2e-08	1.95e-09	8.05e-07	NaN	1.34192	0.775944	0.354382	0.0397764	0.00242023	1.48009	0.239433	0.190239	0.209087	1.2726	1.05447	0.79661	0.974058	0.297273	0.00814146
VIN3	2	16	142	142	1	B3	021-032 VIN3 FP1	1.904	1.907	1.891	1.745	1.848	8.62e-06	2.82e-06	2.5e-06	1.84e-07	4.24e-08	4.93e-06	NaN	1.74949	0.571596	0.507704	0.0372761	0.00859996	1.02211	0.496723	0.160254	0.232606	1.00984	1.73244	0.990258	0.577219	0.893263	0.00962759
VIN3	1	16	142	142	1	E2	021-032 VIN3 FP1	1.904	1.907	1.891	1.745	1.848	1.49e-06	2.81e-07	2.72e-07	1.71e-08	9.92e-09	6.48e-07	NaN	2.30588	0.433675	0.419815	0.0264518	0.0153222	1.02211	0.410735	0.160254	0.165061	1.00984	2.28341	0.990258	0.437941	0.893263	0.0171531
VIN3	3	16	142	142	1	F3	021-032 VIN3 FP1	1.904	1.907	1.891	1.745	1.848	2.14e-06	4.29e-07	2.96e-07	2.86e-08	6.55e-09	9.58e-07	NaN	2.23092	0.448245	0.308678	0.0298793	0.00684078	1.02211	0.302002	0.160254	0.186449	1.00984	2.20919	0.990258	0.452655	0.893263	0.0076582
VIN3	1	16	142	142	2	B6	021-032 VIN3 FP2	1.883	1.889	1.884	1.756	1.844	3.93e-06	4.58e-07	4.46e-07	2.82e-08	9.07e-09	1.34e-06	NaN	2.93177	0.341091	0.332065	0.0209915	0.00676236	0.800969	0.414579	0.108844	0.192859	1.07116	2.73699	0.933564	0.365364	0.582075	0.0116177
VIN3	3	16	142	142	2	E5	021-032 VIN3 FP2	1.883	1.889	1.884	1.756	1.844	2.69e-06	4.16e-07	3.16e-07	1.74e-08	4.12e-09	1.06e-06	NaN	2.54258	0.393302	0.299122	0.0164968	0.00389997	0.800969	0.37345	0.108844	0.151564	1.07116	2.37366	0.933564	0.421291	0.582075	0.00670011
VIN3	2	16	142	142	2	E6	021-032 VIN3 FP2	1.883	1.889	1.884	1.756	1.844	3.69e-06	5.34e-07	4.76e-07	2.13e-08	1.04e-08	1.4e-06	NaN	2.6273	0.380619	0.339298	0.0151876	0.00743846	0.800969	0.423609	0.108844	0.139536	1.07116	2.45275	0.933564	0.407706	0.582075	0.0127792
VIN3	2	18	170	170	1	D3	021-032 VIN3 FP1	1.904	1.907	1.891	1.745	1.848	1.41e-06	3.21e-07	1.99e-07	1.23e-08	2.9e-09	6.73e-07	NaN	2.09819	0.476602	0.295073	0.0182524	0.00431074	1.02211	0.288691	0.160254	0.113897	1.00984	2.07774	0.990258	0.481291	0.893263	0.00482583
VIN3	1	18	170	170	1	G2	021-032 VIN3 FP1	1.904	1.907	1.891	1.745	1.848	2.84e-06	7.71e-07	7.5e-07	5.41e-08	6.89e-09	1.48e-06	NaN	1.91946	0.520981	0.506769	0.0365805	0.00465409	1.02211	0.495808	0.160254	0.228265	1.00984	1.90076	0.990258	0.526106	0.893263	0.00521021
VIN3	3	18	170	170	1	G3	021-032 VIN3 FP1	1.904	1.907	1.891	1.745	1.848	1.97e-06	3.7e-07	2.79e-07	1.64e-08	1.3e-09	8.54e-07	NaN	2.3069	0.433481	0.32663	0.0191497	0.00152265	1.02211	0.319566	0.160254	0.119496	1.00984	2.28443	0.990258	0.437746	0.893263	0.0017046
VIN3	1	18	170	170	2	D6	021-032 VIN3 FP2	1.877	1.885	1.884	1.733	1.851	1.56e-06	6.17e-07	1.17e-09	NaN	6.28e-07	9.8e-07	Contaminated? High VIN3	1.59034	0.628796	0.0011978	NaN	0.640706	NaN	NaN	NaN	NaN	NaN	NaN	NaN	NaN	NaN	NaN
VIN3	2	18	170	170	2	F5	021-032 VIN3 FP2	1.877	1.885	1.884	1.733	1.851	4.97e-06	3.01e-06	1.61e-06	1.16e-07	4.84e-09	3.87e-06	NaN	1.2841	0.778754	0.415766	0.0300577	0.00125006	0.843374	0.492979	0.169043	0.177812	1.10211	1.16513	0.907347	0.858276	0.600895	0.00208033
VIN3	3	18	170	170	1	H6	021-032 VIN3 FP2	1.877	1.885	1.884	1.733	1.851	1.71e-06	7.06e-07	9.3e-07	9.68e-08	2.88e-09	1.1e-06	NaN	1.55749	0.64206	0.845005	0.0879985	0.00261571	0.843374	1.00193	0.169043	0.52057	1.10211	1.41318	0.907347	0.707623	0.600895	0.00435302
VIN3	1	13	100	100	1	1131VIN3	004FP3	1.87999	1.89718	1.86015	1.72219	1.88538	4.78e-08	4.83e-08	3.25e-08	2.39e-09	2.6e-09	4.72e-08	NaN	1.01435	1.02378	0.689885	0.0507704	0.0550469	1.28987	0.534846	0.179254	0.283231	1.25463	0.808489	0.833748	1.22792	0.413129	0.133244
VIN3	2	13	100	100	1	2131VIN3	005FP1	1.87074	1.88866	1.86393	1.73025	1.87136	1.61e-06	1.83e-06	1.01e-06	1.06e-07	5.02e-09	1.69e-06	NaN	0.951315	1.0793	0.597271	0.0628259	0.00296664	0.87872	0.679705	0.123899	0.507075	0.989991	0.960933	1.01214	1.06635	0.335857	0.00883304
VIN3	3	13	100	100	1	3131VIN3	005FP2	1.87738	1.895	1.87672	1.73259	1.86768	3.66e-06	2.88e-06	1.37e-06	1.44e-07	4.15e-09	3.11e-06	NaN	1.17564	0.925324	0.439067	0.0464599	0.00133625	0.850419	0.516295	0.142996	0.324903	1.08724	1.08131	0.937791	0.986706	0.424808	0.00314553
VIN3	2	13	100	100	2	2132VIN3	017FP2	1.88289	1.8966	1.87626	1.68928	1.90023	3.22e-07	3.4e-07	2.17e-07	1.51e-08	6.4e-10	3.28e-07	NaN	0.982081	1.03597	0.662089	0.0461259	0.00195278	1.07709	0.614703	0.291836	0.158054	1.1308	0.868483	0.896035	1.15617	0.346238	0.00563999
VIN3	3	13	100	100	2	3132VIN3	018FP2	1.88126	1.88502	1.87016	1.68571	1.89438	3.94e-07	3.89e-07	1.86e-07	6.75e-08	1.46e-09	3.87e-07	NaN	1.01822	1.00603	0.480932	0.174362	0.00376259	1.1424	0.420984	0.29813	0.584851	1.16813	0.871666	0.866349	1.16123	0.404033	0.00931256
VIN3	1	13	100	100	2	1132VIN3	019FP3	1.89621	1.89562	1.88374	1.70489	1.9038	5.5e-07	5.77e-07	2.56e-07	3.49e-08	1.24e-09	5.59e-07	NaN	0.983708	1.03218	0.458224	0.0624754	0.0022129	1.05274	0.435269	0.249768	0.250134	1.07757	0.912893	0.937987	1.10042	0.358514	0.00617243
VIN3	1	17	156	156	1	1171 VIN3	T17 FP1	1.87875	1.87217	1.86863	1.69041	1.87207	1.15e-06	8.54e-07	3.96e-07	9.07e-08	3.72e-09	9.9e-07	NaN	1.1597	0.862294	0.400396	0.091652	0.00375604	1.15354	0.347103	0.232756	0.393769	1.0991	1.05513	0.909836	0.947747	0.455106	0.00825312
VIN3	2	17	156	156	1	2171 VIN3	T17 FP2	1.86756	1.86273	1.86623	1.68869	1.87493	7.95e-07	6.35e-07	4.87e-07	7.1e-08	2.38e-09	7.11e-07	NaN	1.11855	0.894016	0.685997	0.0998913	0.00334272	1.06957	0.641376	0.222511	0.448928	1.08395	1.03191	0.922548	0.969073	0.377291	0.00885977
VIN3	3	17	156	156	1	3171 VIN3	T17 FP2	1.86756	1.86273	1.86623	1.68869	1.87493	2.2e-06	1.01e-06	3.28e-07	4.35e-08	3.95e-09	1.49e-06	NaN	1.47759	0.676777	0.220664	0.0292795	0.00265531	1.06957	0.206311	0.222511	0.131587	1.08395	1.36315	0.922548	0.733595	0.377291	0.00703781
VIN3	1	17	156	156	2	1172 VIN3	T17 FP3	1.87141	1.85894	1.87842	1.70743	1.8995	8.83e-07	5.22e-07	1.77e-07	2.93e-08	1.15e-09	6.79e-07	NaN	1.30101	0.768632	0.26143	0.0430933	0.00169128	0.995003	0.262743	0.154747	0.278475	1.11643	1.16533	0.895712	0.858124	0.26627	0.00635177
VIN3	2	17	156	156	2	2172 VIN3	T17 FP4	1.88299	1.87427	1.85002	1.70246	1.88145	1.61e-06	4.65e-07	2.53e-07	3.45e-08	1.54e-09	8.65e-07	NaN	1.86106	0.537328	0.292012	0.039851	0.00177671	1.50587	0.193915	0.211762	0.188188	1.01314	1.83693	0.987035	0.544386	0.357668	0.00496749
VIN3	3	17	156	156	2	3172 VIN3	T17 FP4	1.88299	1.87427	1.85002	1.70246	1.88145	1.87e-07	1.59e-07	5.25e-08	1.19e-09	1.37e-10	1.72e-07	NaN	1.0831	0.923273	0.304334	0.00692146	0.000793592	1.50587	0.202099	0.211762	0.0326851	1.01314	1.06906	0.987035	0.9354	0.357668	0.00221879
VIN3	22	22C 13WT10	110	100	2	D7	003 007 FP2	2.123	2.1085	2.249	1.432	2.421	NaN	1.82e-07	1.17e-07	5.16e-09	8.77e-10	NaN	NaN	NaN	NaN	NaN	NaN	NaN	0.892497	NaN	0.051175	NaN	1.01475	NaN	0.985468	NaN	0.362457	NaN
VIN3	22	22C 13WT10	110	100	1	13WT10221VIN3	006FP2	1.88265	1.89284	1.87491	1.75695	1.87568	9.49e-07	9.01e-07	8.96e-07	3.94e-08	7.05e-10	9.15e-07	NaN	1.03632	0.984238	0.978502	0.0430529	0.000769876	0.865121	1.13106	0.0688171	0.625614	1.00911	1.02697	0.999189	0.985036	0.389581	0.00197617
VIN3	22	22C 13WT35	135	100	1	13WT3522CVIN31	017FP1	1.87546	1.88935	1.87213	1.69524	1.8794	3.06e-07	2.05e-07	3.59e-07	9.34e-08	3.58e-10	2.48e-07	NaN	1.23356	0.82847	1.44868	0.376827	0.001444	1.0257	1.41239	0.246117	1.53109	1.18187	1.04373	0.843762	0.981877	0.443765	0.00325399
VIN3	22	22C 13WT35	135	100	2	13WT3522CVIN32	017FP1	1.87546	1.88935	1.87213	1.69524	1.8794	3.72e-07	2.37e-07	5.53e-07	1.73e-07	8.21e-10	2.95e-07	NaN	1.2602	0.803617	1.8741	0.586019	0.00277883	1.0257	1.82715	0.246117	2.38105	1.18187	1.06627	0.843762	0.952422	0.443765	0.00626196
VIN3	22	22C 13WT35	135	100	3	13WT3522CVIN33	017FP1	1.87546	1.88935	1.87213	1.69524	1.8794	7.48e-08	1.42e-07	2.1e-07	2.22e-08	3.71e-10	1.01e-07	NaN	0.738035	1.39812	2.06646	0.218572	0.00366205	1.0257	2.01469	0.246117	0.88808	1.18187	0.624462	0.843762	1.65701	0.443765	0.00825223
VIN3	22	22C 8WT10	75	65	1	8WT10221VIN3	005FP3	1.86287	1.89244	1.86343	1.73985	1.84872	7.57e-07	5.01e-07	5.3e-07	6.94e-08	7.67e-10	6.09e-07	NaN	1.24221	0.821494	0.869305	0.113919	0.00125873	0.90024	0.965637	0.110318	1.03264	1.19392	1.04045	0.864443	0.950317	0.476702	0.00264049
VIN3	22	22C 8WT10	75	65	2	8WT10222VIN3	005FP3	1.86287	1.89244	1.86343	1.73985	1.84872	5.57e-08	5.42e-08	4.17e-08	5.81e-09	3.47e-10	5.45e-08	NaN	1.02224	0.993919	0.765675	0.106582	0.00636274	0.90024	0.850523	0.110318	0.966134	1.19392	0.856208	0.864443	1.14978	0.476702	0.0133474
VIN3	22	22C 8WT10	75	65	3	8WT10223VIN3	006FP1	1.87535	1.8943	1.86145	1.71724	1.85957	7.38e-09	1.43e-08	1.28e-08	1.64e-09	8.55e-10	1.03e-08	Bad UBC	0.720044	1.3952	1.25011	0.159507	0.0833758	NaN	NaN	NaN	NaN	NaN	NaN	NaN	NaN	NaN	NaN
VIN3	22	22C 8WT35	100	65	1	8WT3522CVIN31	016FP1	1.86993	1.90488	1.87282	1.61217	1.88073	2.54e-07	2.72e-07	2.89e-07	4.7e-07	4.46e-08	2.54e-07	NaN	0.999864	1.07379	1.14032	1.85538	0.176027	0.841387	1.35529	1.23341	1.50427	1.11887	0.893635	0.887676	1.20966	0.360456	0.488347
VIN3	22	22C 8WT35	100	65	2	8WT3522CVIN32	016FP1	1.86993	1.90488	1.87282	1.61217	1.88073	3.64e-07	4.22e-07	7.61e-07	1.01e-06	7.36e-10	3.76e-07	NaN	0.969684	1.12192	2.02407	2.68732	0.00195742	0.841387	2.40564	1.23341	2.17876	1.11887	0.866662	0.887676	1.26388	0.360456	0.00543041
VIN3	22	22C 8WT35	100	65	3	8WT3522CVIN33	016FP1	1.86993	1.90488	1.87282	1.61217	1.88073	9.79e-07	8.11e-07	9.45e-07	6.36e-07	6.3e-10	8.51e-07	NaN	1.15047	0.953075	1.11067	0.747565	0.000740622	0.841387	1.32005	1.23341	0.606095	1.11887	1.02824	0.887676	1.07367	0.360456	0.00205468
VIN3	1	3	23	23	1	131VIN3	001FP3	1.88776	1.90249	1.88946	1.76783	1.87991	7.45e-07	6.46e-07	1.18e-06	6.23e-08	1.6e-09	6.62e-07	NaN	1.12504	0.97545	1.78075	0.0941752	0.00242153	0.906749	1.96388	0.0776456	1.21289	1.09732	1.02526	0.95644	1.01988	0.455825	0.00531241
VIN3	2	3	23	23	1	231VIN3	002FP1	1.87608	1.89537	1.88205	1.72199	1.8543	1.03e-07	9.41e-08	1.35e-07	2.27e-08	9.47e-10	9.73e-08	NaN	1.06249	0.967803	1.39083	0.233367	0.00974019	0.75207	1.84934	0.1661	1.40498	1.07309	0.990124	0.946048	1.023	0.564559	0.0172527
VIN3	3	3	23	23	1	331VIN3	002FP2	1.87118	1.89254	1.89011	1.72422	1.87263	1.16e-07	1.07e-07	1.95e-07	2.17e-08	3.3e-10	1.11e-07	NaN	1.04028	0.963188	1.74966	0.195198	0.0029672	0.715707	2.44465	0.162288	1.20279	1.26694	0.821103	0.833998	1.1549	0.456103	0.00650554
VIN3	3	3	23	23	2	332VIN3	009FP2	1.86867	1.88053	1.87899	1.73996	1.85198	1.12e-06	8.7e-07	1.47e-06	1.34e-07	2.29e-09	9.88e-07	NaN	1.13614	0.880612	1.48619	0.135385	0.00231285	0.70459	2.1093	0.0982326	1.37821	1.01537	1.11893	1.02179	0.861832	0.432925	0.00534237
VIN3	1	3	23	23	2	132VIN3	011FP2	1.88374	1.88426	1.87076	1.72274	1.86785	7.45e-07	5.74e-07	6.09e-07	1.13e-07	8.04e-09	6.35e-07	NaN	1.17177	0.902766	0.958558	0.177254	0.0126456	0.937812	1.02212	0.148047	1.19728	1.08108	1.08389	0.96236	0.938076	0.411209	0.0307522
VIN3	2	3	23	23	2	232VIN3	012FP2	1.88245	1.87766	1.86989	1.71715	1.85858	3e-07	1.72e-07	4.15e-07	3.71e-08	3.66e-10	2.2e-07	NaN	1.36497	0.784506	1.88767	0.168912	0.00166725	0.81933	2.30392	0.130602	1.29333	0.892982	1.52855	1.13319	0.692297	0.43295	0.00385091
VIN3	8	8C 13WT10	90	100	1	13WT1081VIN3	010FP3	1.88543	1.88372	1.85925	1.72716	1.86435	1.12e-06	7.88e-07	1.64e-08	5.72e-09	7.77e-07	9.34e-07	NaN	1.19928	0.843478	0.017594	0.00611926	0.831734	1.19145	0.0147669	0.168392	0.0363394	0.997579	1.20219	1.08388	0.778203	0.54746	1.51926
VIN3	8	8C 13WT10	90	100	2	13WT1082VIN3	011FP3	1.88881	1.88016	1.85109	1.72167	1.88629	4.54e-07	1.04e-06	3.19e-07	1.54e-08	1.36e-09	6.72e-07	NaN	0.675867	1.5452	0.474093	0.0229059	0.00201732	1.26525	0.374702	0.146125	0.156755	1.02585	0.658835	1.00505	1.53743	0.359094	0.0056178
VIN3	8	8C 13WT10	90	100	3	13WT1083VIN3	012FP3	1.8895	1.90192	1.85731	1.72452	1.89094	3.2e-06	3.27e-06	2.02e-06	8.6e-08	7.71e-09	3.22e-06	NaN	0.994041	1.01632	0.62828	0.0267484	0.00239862	1.17866	0.533045	0.176063	0.151926	1.0656	0.932848	0.963561	1.05475	0.358734	0.00668635
VIN3	8	8C 8WT10	55	65	1	E10	003 007 FP3	1.5135	1.2735	1.3425	1.452	1.524	6.97e-07	5.68e-07	3.51e-07	4.6e-08	8.9e-10	6.29e-07	NaN	1.10769	0.902776	0.5574	0.0730361	0.00141402	1.12769	0.494286	0.261795	0.278982	1.31456	0.842635	0.76071	1.18675	0.481903	0.00293424
VIN3	8	8C 8WT10	55	65	3	8WT1083VIN3	009FP3	1.87988	1.88296	1.87016	1.71813	1.87523	8.36e-07	1.12e-06	5.14e-07	1.05e-07	2.11e-09	9.61e-07	NaN	0.870619	1.16582	0.535251	0.109365	0.00219412	0.972884	0.550169	0.13649	0.801263	0.935877	0.930271	1.08637	1.07313	0.321839	0.00681745
VRN1	1	1	9	9	1	111VRN1	006FP3	1.87135	1.88785	1.86674	1.72318	1.88094	1.47e-09	1.32e-08	1.51e-10	2.23e-09	2.18e-10	4.11e-09	Bad UBC	0.356844	3.21683	0.0366889	0.542136	0.0530259	2.43184	0.0150869	0.367617	1.47473	3.40765	0.104719	1.5644	2.05628	1.03782	0.0510933
VRN1	3	1	9	9	1	C5	007 008 FP1	1.87329	1.89506	1.87916	1.73378	1.87786	1.78e-09	1.2e-08	6.11e-09	3.18e-09	8.96e-10	4.63e-09	Bad UBC	0.38489	2.59814	1.31948	0.686602	0.193538	0.982724	1.34268	0.181607	3.7807	1.17757	0.326852	0.849207	3.05949	0.514649	0.376059
VRN1	1	1	9	9	2	112VRN1	009FP1	1.868	1.8849	1.87638	1.74067	1.84771	2.95e-07	2.38e-07	4.76e-07	1.07e-07	2.85e-09	2.64e-07	NaN	1.11709	0.901775	1.80621	0.406048	0.0108231	0.841732	2.14582	0.0920425	4.41152	1.08201	1.03241	0.963693	0.935749	0.507846	0.0213117
VRN1	2	1	9	9	2	212VRN1	010FP1	1.8647	1.8809	1.87955	1.72822	1.85484	8.13e-09	2.12e-09	4.43e-09	1.5e-09	2.65e-10	4.14e-09	Bad UBC	1.9619	0.511015	1.06906	0.362152	0.0639732	0.714524	1.49619	0.110966	3.26363	1.045	1.87741	1.0011	0.510452	0.484065	0.132158
VRN1	3	1	9	9	2	312VRN1	011FP1	1.875	1.88906	1.8814	1.72278	1.84935	4.4e-07	2.95e-07	2.79e-07	7.01e-08	5.92e-10	3.5e-07	NaN	1.25705	0.84313	0.796275	0.200336	0.00169221	0.780389	1.02036	0.143972	1.39149	1.28092	0.981366	0.830475	1.01524	0.596948	0.00283477
VRN1	1	2	16	16	1	121VRN1	001FP1	1.86774	1.90213	1.87451	1.71119	1.84445	2.3e-07	2.3e-07	5.03e-07	7.63e-08	2.34e-09	2.25e-07	NaN	1.02009	1.02327	2.23455	0.338785	0.0103754	0.880708	2.53722	0.192921	1.75608	1.13909	0.895538	0.889496	1.15039	0.67031	0.0154785
VRN1	2	2	16	16	1	221VRN1	001FP1	1.86774	1.90213	1.87451	1.71119	1.84445	1.07e-07	1.53e-07	3.19e-07	3.6e-08	1.52e-09	1.27e-07	NaN	0.844135	1.2013	2.51469	0.283623	0.011939	0.880708	2.8553	0.192921	1.47015	1.13909	0.741064	0.889496	1.35054	0.67031	0.0178112
VRN1	3	2	16	16	1	321VRN1	001FP2	1.86641	1.8869	1.86963	1.74128	1.85735	2.64e-07	3.81e-07	2.99e-07	4.53e-08	7.96e-10	3.14e-07	NaN	0.840509	1.21153	0.950708	0.144233	0.00253317	0.82159	1.15716	0.0913827	1.57834	1.17879	0.713029	0.907243	1.3354	0.492102	0.00514765
VRN1	2	2	16	16	2	222VRN1	009FP1	1.868	1.8849	1.87638	1.74067	1.84771	4.35e-07	4.72e-07	6.97e-07	1.04e-07	2.21e-09	4.52e-07	NaN	0.962452	1.04233	1.53994	0.230807	0.00487851	0.841732	1.82949	0.0920425	2.50761	1.08201	0.889501	0.963693	1.0816	0.507846	0.0096063
VRN1	3	2	16	16	2	322VRN1	010FP2	1.87255	1.89381	1.86992	1.73219	1.84777	7.61e-07	1.89e-07	5.66e-07	1.15e-07	1.37e-09	3.78e-07	NaN	2.01108	0.499638	1.49677	0.304009	0.00362965	1.44712	1.03431	0.202229	1.50329	1.71879	1.17005	0.645878	0.773578	0.919584	0.00394705
VRN1	1	2	16	16	2	122VRN1	012FP1	1.88099	1.89659	1.87632	1.72076	1.85176	2.54e-07	9.22e-08	2.34e-07	5.59e-08	3.82e-10	1.48e-07	NaN	1.71302	0.622477	1.57813	0.37746	0.00257995	0.784247	2.01229	0.146598	2.57479	1.05045	1.63074	0.966884	0.643797	0.531422	0.00485481
VRN1	1	5	37	37	1	151VRN1	002FP2	1.87118	1.89254	1.89011	1.72422	1.87263	1.47e-07	1.6e-07	9.81e-08	2.01e-08	1.35e-08	1.52e-07	NaN	0.965359	1.05132	0.64601	0.132034	0.089054	0.715707	0.902617	0.162288	0.813578	1.26694	0.761964	0.833998	1.26058	0.456103	0.19525
VRN1	3	5	37	37	1	251VRN1	002FP3	1.88057	1.90335	1.89829	1.7732	1.88871	3.04e-07	2.9e-07	2.73e-07	1.42e-08	1.54e-08	2.92e-07	NaN	1.04061	0.994116	0.93551	0.0484495	0.0526797	0.69207	1.35176	0.0619552	0.782009	1.04029	1.00031	0.981386	1.01297	0.33273	0.158326
VRN1	2	5	37	37	1	G2	003 007 FP1	1.87329	1.89506	1.87916	1.73378	1.87786	6.06e-07	8.77e-07	5.24e-07	1.35e-07	1.7e-08	7.29e-07	NaN	0.830822	1.20363	0.719187	0.185117	0.0232897	0.982724	0.73183	0.181607	1.01933	1.17757	0.70554	0.849207	1.41735	0.514649	0.0452537
VRN1	1	5	37	37	2	152VRN1	010FP2	1.87255	1.89381	1.86992	1.73219	1.84777	3.47e-07	4.49e-07	3.01e-07	8.75e-08	1.77e-08	3.93e-07	NaN	0.883165	1.14157	0.764543	0.222641	0.044904	1.44712	0.528321	0.202229	1.10093	1.71879	0.51383	0.645878	1.76747	0.919584	0.0488308
VRN1	3	5	37	37	2	252VRN1	011FP3	1.88881	1.88016	1.85109	1.72167	1.88629	4.71e-07	4.07e-07	5.59e-07	4.39e-08	6.72e-09	4.3e-07	NaN	1.09585	0.946826	1.29955	0.102245	0.0156245	1.26525	1.02711	0.146125	0.699708	1.02585	1.06823	1.00505	0.942067	0.359094	0.043511
VRN1	2	5	37	37	2	352VRN1	012FP2	1.88245	1.87766	1.86989	1.71715	1.85858	5.57e-07	2.75e-07	4.17e-07	4.18e-08	7.26e-09	3.88e-07	NaN	1.43639	0.710126	1.07381	0.107708	0.0187095	0.81933	1.3106	0.130602	0.824706	0.892982	1.60854	1.13319	0.626659	0.43295	0.0432139
VRN1	1	7	51	51	1	E3	003 007 FP1	1.87329	1.89506	1.87916	1.73378	1.87786	6.61e-07	3.86e-07	7e-07	8.04e-08	1.21e-07	5.05e-07	NaN	1.30936	0.763732	1.38604	0.159135	0.239115	0.982724	1.41041	0.181607	0.876259	1.17757	1.11192	0.849207	0.899347	0.514649	0.464619
VRN1	2	7	51	51	1	F4	003 007 FP1	1.87329	1.89506	1.87916	1.73378	1.87786	2.52e-07	4.06e-07	4.84e-07	6.83e-08	6.97e-08	3.2e-07	NaN	0.788258	1.26862	1.51356	0.213642	0.217798	0.982724	1.54017	0.181607	1.1764	1.17757	0.669395	0.849207	1.49389	0.514649	0.423197
VRN1	3	7	51	51	2	372VRN1	016FP7	1.89644	1.88728	1.89109	1.70604	1.89299	4.42e-07	6.79e-07	4.4e-07	1.37e-07	3.99e-08	5.44e-07	NaN	0.812032	1.24745	0.808439	0.252098	0.0734273	0.661754	1.22166	0.145177	1.73648	0.87103	0.932267	1.21042	1.03059	0.287181	0.255683
VRN1	1	7	51	51	2	172VRN1	019FP7	1.88187	1.90044	1.90038	1.72628	1.91807	1.24e-06	6.62e-07	3.63e-07	5.47e-08	4.53e-08	8.9e-07	NaN	1.39691	0.743261	0.407664	0.0613948	0.0508335	0.825716	0.49371	0.149663	0.410221	1.12108	1.24604	0.894724	0.830716	0.286746	0.177277
VRN1	2	7	51	51	2	272VRN1	020FP2	1.90785	1.89962	1.88201	1.68971	1.90013	5.46e-07	2.6e-07	3.38e-07	8.43e-08	4.26e-08	3.68e-07	NaN	1.48136	0.706158	0.917715	0.228896	0.115723	1.25034	0.733974	0.3489	0.656051	0.987811	1.49964	1.02211	0.690885	0.418299	0.276651
VRN1	1	9	65	65	1	191VRN1	004FP1	1.86813	1.89054	1.87135	1.70021	1.87385	6.3e-07	5.73e-07	4.31e-07	5.2e-08	3.06e-07	5.83e-07	NaN	1.08126	0.983383	0.738469	0.0891283	0.524903	0.876494	0.842527	0.227034	0.392576	1.11778	0.96733	0.921858	1.06674	0.389836	1.34647
VRN1	2	9	65	65	1	291VRN1	004FP2	1.87305	1.89591	1.87559	1.74662	1.87864	4.71e-07	4.19e-07	5.49e-07	3.84e-08	3.25e-07	4.41e-07	NaN	1.06864	0.950926	1.24445	0.0870518	0.736329	1.28987	0.964786	0.0723901	1.20254	1.02024	1.04743	0.833748	1.14054	0.240781	3.05809
VRN1	3	9	65	65	1	391VRN1	004FP2	1.87305	1.89591	1.87559	1.74662	1.87864	1.41e-08	1.08e-08	1.79e-08	1.49e-09	1.18e-08	1.23e-08	Bad UBC	1.14955	0.876605	1.4522	0.12155	0.962168	1.28987	1.12584	0.0723901	1.6791	1.02024	1.12674	0.833748	1.0514	0.240781	3.99603
VRN1	1	9	65	65	2	192VRN1	013FP2	1.89904	1.90271	1.9034	1.70761	1.889	2.94e-07	2.77e-07	2.24e-07	7.53e-08	2.58e-07	2.84e-07	NaN	1.03621	0.974411	0.78945	0.265263	0.907189	0.764524	1.0326	0.233327	1.13687	0.946251	1.09507	1.13119	0.861402	0.356246	2.54652
VRN1	3	9	65	65	2	392VRN1	014FP1	1.89092	1.8987	1.87583	1.68581	1.89428	3.06e-07	2.62e-07	3.34e-07	5.28e-08	1.34e-07	2.67e-07	NaN	1.14504	0.979933	1.24969	0.197608	0.500945	1.19098	1.0493	0.405493	0.487327	1.29674	0.883013	0.844208	1.16077	0.417674	1.19937
VRN1	2	9	65	65	2	292VRN1	015FP2	1.90353	1.89417	1.87892	1.71913	1.89298	5.02e-07	4.57e-07	3.43e-07	6.72e-08	2.35e-07	4.75e-07	NaN	1.05646	0.962638	0.721302	0.141511	0.495529	1.04908	0.687558	0.205684	0.688002	1.0516	1.00463	0.968382	0.994069	0.366226	1.35307
VRN1	2	11	79	79	1	B12	003 007 FP3	1.5135	1.2735	1.3425	1.452	1.524	NaN	1.55e-07	6.77e-08	1.55e-08	8.96e-08	NaN	NaN	NaN	NaN	NaN	NaN	NaN	1.12769	NaN	0.261795	NaN	1.31456	NaN	0.76071	NaN	0.481903	NaN
VRN1	1	11	79	79	1	1111VRN1	006FP3	1.87135	1.88785	1.86674	1.72318	1.88094	1.5e-06	7.32e-07	4.76e-07	1.39e-07	5.33e-07	1.03e-06	NaN	1.45517	0.707788	0.460291	0.134106	0.515781	2.43184	0.189277	0.367617	0.364797	3.40765	0.42703	1.5644	0.452435	1.03782	0.496983
VRN1	3	11	79	79	2	3112VRN1	014FP4	1.87992	1.91971	1.87856	1.70837	1.88699	1.7e-06	9.43e-07	7.51e-07	1.05e-07	5.14e-07	1.19e-06	NaN	1.43608	0.794113	0.632622	0.0885681	0.432765	1.09719	0.576584	0.241073	0.367392	1.21167	1.18521	0.869193	0.913622	0.360863	1.19925
VRN1	2	11	79	79	2	2112VRN1	015FP3	1.89281	1.89762	1.89592	1.71722	1.92113	1.3e-06	8.62e-07	3.24e-07	4.96e-08	2.28e-07	1.02e-06	NaN	1.26934	0.844305	0.317227	0.0485723	0.223663	0.898213	0.353176	0.195903	0.24794	1.17831	1.07726	0.874314	0.965677	0.28899	0.773948
VRN1	3	14	114	114	2	3142VRN1	015FP2	1.90353	1.89417	1.87892	1.71913	1.89298	3.23e-07	7.29e-07	1.71e-07	1.23e-08	3.6e-07	4.62e-07	NaN	0.700459	1.57924	0.370487	0.0266865	0.779505	1.04908	0.353155	0.205684	0.129745	1.0516	0.666091	0.968382	1.6308	0.366226	2.12848
VRN1	1	14	114	114	1	1141VRN1	016FP6	1.8662	1.90549	1.89735	1.72908	1.88794	9.85e-07	8.79e-07	1.31e-07	2.15e-08	3.95e-07	8.88e-07	NaN	1.10866	0.989523	0.147289	0.0242544	0.445054	0.773496	0.19042	0.122447	0.19808	1.33059	0.833214	0.748278	1.3224	0.401535	1.10838
VRN1	2	14	114	114	1	2141VRN1	017FP2	1.88289	1.8966	1.87626	1.68928	1.90023	1.87e-07	2.64e-07	1.3e-07	1.29e-08	2.32e-07	2.21e-07	NaN	0.849817	1.19808	0.588144	0.0586489	1.05316	1.07709	0.546051	0.291836	0.200966	1.1308	0.751518	0.896035	1.33709	0.346238	3.04172
VRN1	3	14	114	114	1	3141VRN1	018FP1	1.87818	1.88808	1.8758	1.73444	1.88665	1.11e-06	9.07e-07	2.74e-07	1.91e-08	1.47e-06	9.97e-07	NaN	1.11761	0.909915	0.274776	0.0191538	1.47626	0.884537	0.310644	0.115537	0.165781	1.0584	1.05594	0.897426	1.01392	0.344665	4.28318
VRN1	1	14	114	114	2	1142VRN1	019FP3	1.89621	1.89562	1.88374	1.70489	1.9038	7.28e-07	7.37e-07	1.86e-07	1.1e-07	5.63e-07	7.3e-07	NaN	0.997329	1.01029	0.254479	0.150995	0.771177	1.05274	0.241731	0.249768	0.60454	1.07757	0.925533	0.937987	1.07709	0.358514	2.15104
VRN1	2	14	114	114	2	2142VRN1	020FP2	1.90785	1.89962	1.88201	1.68971	1.90013	9.11e-07	1.09e-06	3.61e-07	3.99e-08	1.09e-06	9.91e-07	NaN	0.919498	1.0993	0.364649	0.0402488	1.10052	1.25034	0.291641	0.3489	0.115359	0.987811	0.930844	1.02211	1.07552	0.418299	2.63095
VRN1	1	15	128	128	1	1151VRN1	013FP1	1.89261	1.89846	1.88809	1.69849	1.89229	2.42e-06	4.19e-07	1.37e-07	8.18e-08	1.47e-06	9.96e-07	NaN	2.43076	0.420553	0.137634	0.0821595	1.47988	1.31204	0.104901	0.362568	0.226604	1.60658	1.513	0.981732	0.428378	0.553116	2.67553
VRN1	2	15	128	128	1	2151VRN1	014FP1	1.89092	1.8987	1.87583	1.68581	1.89428	4.07e-06	1.87e-06	3.98e-07	1.38e-07	3.04e-06	2.68e-06	NaN	1.51945	0.697056	0.148509	0.0516287	1.13728	1.19098	0.124696	0.405493	0.127323	1.29674	1.17174	0.844208	0.825692	0.417674	2.72288
VRN1	3	15	128	128	1	3151VRN1	015FP1	1.88579	1.88749	1.87612	1.70145	1.88913	1.65e-06	9.54e-07	2.55e-07	6.43e-08	1.65e-06	1.24e-06	NaN	1.3306	0.770429	0.205468	0.051941	1.3317	1.15935	0.177226	0.301099	0.172505	1.24228	1.0711	0.860931	0.894879	0.463419	2.87363
VRN1	2	15	128	128	2	2152VRN1	017FP3	1.87941	1.89809	1.85559	1.70262	1.89286	1.25e-07	1.67e-07	5.11e-08	1.88e-09	1.71e-07	1.44e-07	NaN	0.870375	1.15758	0.355273	0.0130614	1.18637	1.42603	0.249135	0.239244	0.0545946	1.16481	0.747226	0.874626	1.32351	0.398456	2.97742
VRN1	3	15	128	128	2	3152VRN1	018FP7	1.8863	1.89323	1.88903	1.71439	1.89462	5.44e-07	4.77e-07	1.11e-07	2.99e-08	1e-06	4.92e-07	NaN	1.10491	0.969583	0.225329	0.060688	2.03401	0.943137	0.238915	0.184797	0.328403	1.03835	1.06411	0.965986	1.00372	0.390366	5.21052
VRN1	1	15	128	128	2	1152VRN1	020FP3	1.8778	1.90697	1.86206	1.71413	1.91182	1.98e-06	9.8e-07	2.9e-07	2.21e-08	8.25e-07	1.36e-06	NaN	1.46028	0.721218	0.21324	0.0162349	0.607029	1.48009	0.144072	0.190239	0.0853395	1.2726	1.14748	0.79661	0.905359	0.297273	2.04199
VRN1	1	13	100	100	1	1131VRN1	004FP3	1.87999	1.89718	1.86015	1.72219	1.88538	5.41e-06	5.08e-06	3.43e-06	1.65e-07	3.38e-06	5.11e-06	NaN	1.05881	0.993878	0.670624	0.0323978	0.661452	1.28987	0.519914	0.179254	0.180737	1.25463	0.843929	0.833748	1.19206	0.413129	1.60108
VRN1	2	13	100	100	1	2131VRN1	005FP1	1.87074	1.88866	1.86393	1.73025	1.87136	1.52e-06	1.79e-06	1.31e-06	1.07e-07	1.32e-06	1.64e-06	NaN	0.922969	1.08961	0.797823	0.0652032	0.805708	0.87872	0.907938	0.123899	0.526262	0.989991	0.932301	1.01214	1.07653	0.335857	2.39896
VRN1	3	13	100	100	1	3131VRN1	005FP2	1.87738	1.895	1.87672	1.73259	1.86768	3.11e-06	1.92e-06	5.37e-07	9.7e-08	2.65e-06	2.39e-06	NaN	1.30166	0.803995	0.225166	0.0406327	1.10977	0.850419	0.26477	0.142996	0.284152	1.08724	1.19722	0.937791	0.857328	0.424808	2.6124
VRN1	2	13	100	100	2	2132VRN1	017FP2	1.88289	1.8966	1.87626	1.68928	1.90023	1.75e-07	3.34e-07	1.34e-07	1.22e-08	2.43e-07	2.41e-07	NaN	0.725228	1.38697	0.554271	0.0507161	1.01055	1.07709	0.514602	0.291836	0.173783	1.1308	0.64134	0.896035	1.5479	0.346238	2.91865
VRN1	3	13	100	100	2	3132VRN1	018FP2	1.88126	1.88502	1.87016	1.68571	1.89438	2.21e-07	2.41e-07	1.34e-07	1.59e-08	2.53e-07	2.3e-07	NaN	0.962103	1.04937	0.581959	0.0691485	1.1001	1.1424	0.509417	0.29813	0.231941	1.16813	0.82363	0.866349	1.21126	0.404033	2.7228
VRN1	1	13	100	100	2	1132VRN1	019FP3	1.89621	1.89562	1.88374	1.70489	1.9038	4.14e-07	5.38e-07	1.91e-07	2.03e-08	3.46e-07	4.63e-07	NaN	0.894062	1.16154	0.411239	0.0437571	0.746301	1.05274	0.390637	0.249768	0.175191	1.07757	0.8297	0.937987	1.23834	0.358514	2.08165
VRN1	1	17	156	156	1	1171 VRN1	T17 FP1	1.87875	1.87217	1.86863	1.69041	1.87207	1.45e-06	7.1e-07	1.92e-07	3.5e-08	9.51e-07	1.01e-06	NaN	1.42693	0.700804	0.189794	0.0345311	0.938062	1.15354	0.164532	0.232756	0.148358	1.0991	1.29827	0.909836	0.770253	0.455106	2.0612
VRN1	2	17	156	156	1	2171 VRN1	T17 FP1	1.87875	1.87217	1.86863	1.69041	1.87207	1.95e-06	9.53e-07	4.65e-07	6.8e-08	1.3e-06	1.36e-06	NaN	1.43183	0.698408	0.340464	0.0497966	0.952776	1.15354	0.295148	0.232756	0.213944	1.0991	1.30273	0.909836	0.767619	0.455106	2.09353
VRN1	3	17	156	156	1	3171 VRN1	T17 FP2	1.86756	1.86273	1.86623	1.68869	1.87493	1.08e-06	7.02e-07	1.75e-07	4.47e-08	5.43e-07	8.71e-07	NaN	1.24017	0.806343	0.201271	0.0512812	0.623162	1.06957	0.188179	0.222511	0.230466	1.08395	1.14411	0.922548	0.874039	0.377291	1.65167
VRN1	1	17	156	156	2	1172 VRN1	T17 FP3	1.87141	1.85894	1.87842	1.70743	1.8995	1.63e-06	7.65e-07	1.88e-07	2.74e-08	4.65e-07	1.12e-06	NaN	1.4595	0.685166	0.168607	0.024544	0.415885	0.995003	0.169453	0.154747	0.158607	1.11643	1.30729	0.895712	0.76494	0.26627	1.56189
VRN1	2	17	156	156	2	2172 VRN1	T17 FP4	1.88299	1.87427	1.85002	1.70246	1.88145	6e-07	2.96e-07	1.08e-07	1.24e-08	4.66e-07	4.22e-07	NaN	1.42302	0.702733	0.255896	0.0293534	1.10571	1.50587	0.169932	0.211762	0.138615	1.01314	1.40457	0.987035	0.711963	0.357668	3.09143
VRN1	3	17	156	156	2	3172 VRN1	T17 FP5	1.8793	1.89836	1.8706	1.69511	1.88532	4.67e-07	3.64e-07	8.91e-08	6.1e-09	1.75e-07	4.12e-07	NaN	1.13244	0.883048	0.215999	0.0147891	0.42483	0.856659	0.252141	0.208815	0.0708242	1.02319	1.10678	0.977339	0.903523	0.261137	1.62685
VRN1	22	22C 13WT10	110	100	1	13WT10221VRN1	006FP2	1.88265	1.89284	1.87491	1.75695	1.87568	1.52e-06	1.98e-06	1.34e-06	1.59e-07	5.97e-09	1.72e-06	NaN	0.887356	1.15334	0.780896	0.0925022	0.00347912	0.865121	0.902643	0.0688171	1.34417	1.00911	0.879348	0.999189	1.15428	0.389581	0.00893041
VRN1	22	22C 13WT35	135	100	1	13WT3522CVRN11	017FP1	1.87546	1.88935	1.87213	1.69524	1.8794	3.46e-07	3.31e-07	3.76e-07	6.18e-08	4.71e-10	3.34e-07	NaN	1.03586	0.992105	1.12652	0.185218	0.00141149	1.0257	1.0983	0.246117	0.752559	1.18187	0.876459	0.843762	1.17581	0.443765	0.00318072
VRN1	22	22C 13WT35	135	100	2	13WT3522CVRN12	017FP1	1.87546	1.88935	1.87213	1.69524	1.8794	1.3e-07	1.27e-07	1.71e-07	5.81e-08	1.5e-09	1.28e-07	NaN	1.01934	0.993681	1.33527	0.454949	0.011753	1.0257	1.30182	0.246117	1.8485	1.18187	0.862476	0.843762	1.17768	0.443765	0.0264848
VRN1	22	22C 13WT35	135	100	3	13WT3522CVRN13	017FP1	1.87546	1.88935	1.87213	1.69524	1.8794	2.68e-07	4.82e-07	3.83e-07	2.34e-08	9.54e-10	3.52e-07	NaN	0.759932	1.36876	1.08837	0.0665596	0.00270718	1.0257	1.0611	0.246117	0.270438	1.18187	0.64299	0.843762	1.62221	0.443765	0.00610048
VRN1	22	22C 8WT10	75	65	2	8WT10222VRN1	005FP2	1.87738	1.895	1.87672	1.73259	1.86768	2.85e-08	5.63e-08	4.27e-08	3.75e-09	4.66e-10	3.92e-08	NaN	0.726946	1.43572	1.08961	0.0957492	0.0118878	0.850419	1.28126	0.142996	0.669592	1.08724	0.668616	0.937791	1.53096	0.424808	0.027984
VRN1	22	22C 8WT10	75	65	1	8WT10221VRN1	005FP3	1.86287	1.89244	1.86343	1.73985	1.84872	2.68e-07	3.12e-07	2.15e-07	1.42e-08	1.19e-09	2.84e-07	NaN	0.942368	1.09914	0.757338	0.0499278	0.0041903	0.90024	0.841262	0.110318	0.452579	1.19392	0.789307	0.864443	1.2715	0.476702	0.00879019
VRN1	22	22C 8WT10	75	65	3	8WT10223VRN1	006FP1	1.87535	1.8943	1.86145	1.71724	1.85957	1.59e-07	6.78e-08	7.78e-08	1.14e-08	1.51e-09	1.04e-07	NaN	1.53541	0.654397	0.751103	0.109858	0.0145497	1.07759	0.697021	0.164461	0.667987	1.2976	1.18327	0.810554	0.807346	0.573216	0.0253826
VRN1	22	22C 8WT35	100	65	1	8WT3522CVRN11	016FP1	1.86993	1.90488	1.87282	1.61217	1.88073	2.65e-07	3.71e-07	3.37e-07	5.87e-07	6.52e-09	3.01e-07	NaN	0.881533	1.23234	1.11924	1.95252	0.0216807	0.841387	1.33023	1.23341	1.58302	1.11887	0.787876	0.887676	1.38827	0.360456	0.060148
VRN1	22	22C 8WT35	100	65	2	8WT3522CVRN12	016FP1	1.86993	1.90488	1.87282	1.61217	1.88073	7.32e-07	7.23e-07	5.89e-07	1e-06	1.64e-08	7.03e-07	NaN	1.04184	1.02923	0.838324	1.42464	0.0233787	0.841387	0.996359	1.23341	1.15504	1.11887	0.931155	0.887676	1.15947	0.360456	0.0648588
VRN1	22	22C 8WT35	100	65	3	8WT3522CVRN13	016FP1	1.86993	1.90488	1.87282	1.61217	1.88073	3.41e-07	3.66e-07	4.69e-07	5.82e-07	2.86e-09	3.43e-07	NaN	0.994234	1.06658	1.36741	1.69544	0.00834728	0.841387	1.62519	1.23341	1.3746	1.11887	0.888603	0.887676	1.20154	0.360456	0.0231576
VRN1	1	3	23	23	1	131VRN1	001FP3	1.88776	1.90249	1.88946	1.76783	1.87991	1.02e-06	6.55e-07	6.47e-07	3.08e-08	4.93e-09	8.01e-07	NaN	1.27256	0.818205	0.80787	0.038455	0.0061479	0.906749	0.890952	0.0776456	0.495263	1.09732	1.1597	0.95644	0.855469	0.455825	0.0134874
VRN1	2	3	23	23	1	231VRN1	002FP1	1.87608	1.89537	1.88205	1.72199	1.8543	1.15e-09	1.24e-09	4.14e-10	2.12e-10	6.48e-10	1.19e-09	Bad UBC	0.96645	1.04252	0.347487	0.17814	0.543728	0.75207	0.462041	0.1661	1.07248	1.07309	0.900625	0.946048	1.10197	0.564559	0.963102
VRN1	3	3	23	23	1	331VRN1	002FP1	1.87608	1.89537	1.88205	1.72199	1.8543	1.6e-07	2.19e-07	2.01e-07	3.36e-08	3.12e-09	1.83e-07	NaN	0.87375	1.19413	1.09477	0.183174	0.016981	0.75207	1.45567	0.1661	1.10279	1.07309	0.814239	0.946048	1.26223	0.564559	0.0300783
VRN1	3	3	23	23	2	332VRN1	009FP3	1.87988	1.88296	1.87016	1.71813	1.87523	5.54e-07	5.35e-07	1.09e-06	1.42e-07	1.99e-09	5.38e-07	NaN	1.02982	0.994467	2.03422	0.264164	0.00369891	0.972884	2.09092	0.13649	1.9354	0.935877	1.10038	1.08637	0.915404	0.321839	0.0114931
VRN1	1	3	23	23	2	132VRN1	011FP2	1.88374	1.88426	1.87076	1.72274	1.86785	4.25e-07	4.97e-07	4.61e-07	3.97e-08	2.85e-09	4.55e-07	NaN	0.933712	1.09367	1.01447	0.0873828	0.00626733	0.937812	1.08174	0.148047	0.590236	1.08108	0.863686	0.96236	1.13644	0.411209	0.0152412
VRN1	2	3	23	23	2	232VRN1	012FP2	1.88245	1.87766	1.86989	1.71715	1.85858	1.22e-06	3.69e-07	5.62e-07	7.89e-08	1.33e-09	6.44e-07	NaN	1.89254	0.573889	0.87321	0.122505	0.00206599	0.81933	1.06576	0.130602	0.937999	0.892982	2.11935	1.13319	0.506435	0.43295	0.00477189
VRN1	8	8C 13WT10	90	100	1	13WT1081VRN1	010FP3	1.88543	1.88372	1.85925	1.72716	1.86435	9.13e-07	5.65e-07	3.99e-07	3.5e-08	5.85e-07	7.16e-07	NaN	1.27568	0.789354	0.557796	0.0488594	0.816741	1.19145	0.468167	0.168392	0.290153	0.997579	1.27878	1.08388	0.728268	0.54746	1.49187
VRN1	8	8C 13WT10	90	100	2	13WT1082VRN1	011FP3	1.88881	1.88016	1.85109	1.72167	1.88629	1.64e-06	2.94e-06	1.09e-06	5.89e-08	9.13e-07	2.17e-06	NaN	0.75336	1.35127	0.501999	0.0270966	0.419622	1.26525	0.396757	0.146125	0.185434	1.02585	0.734374	1.00505	1.34448	0.359094	1.16856
VRN1	8	8C 13WT10	90	100	3	13WT1083VRN1	012FP3	1.8895	1.90192	1.85731	1.72452	1.89094	9.07e-06	6.4e-06	3.24e-06	1.89e-07	3.96e-06	8.08e-06	NaN	1.12356	0.792186	0.401346	0.0234588	0.490632	1.17866	0.34051	0.176063	0.133241	1.0656	1.05439	0.963561	0.822144	0.358734	1.36768
VRN1	8	8C 8WT10	55	65	1	H10	003 007 FP3	1.5135	1.2735	1.3425	1.452	1.524	1.34e-07	1.19e-07	6.05e-08	6.77e-09	5.1e-08	1.27e-07	NaN	1.06124	0.942294	0.478517	0.0535087	0.403414	1.12769	0.424335	0.261795	0.204391	1.31456	0.807296	0.76071	1.2387	0.481903	0.837126
VRN1	8	8C 8WT10	55	65	3	8WT1083VRN1	009FP3	1.87988	1.88296	1.87016	1.71813	1.87523	4.7e-07	4.13e-07	2.12e-07	3.93e-08	2.49e-07	4.41e-07	NaN	1.06773	0.937122	0.481344	0.0891598	0.565975	0.972884	0.49476	0.13649	0.653232	0.935877	1.14089	1.08637	0.862618	0.321839	1.75857
VRN2	2	1	9	9	1	G9	003 007 FP3	1.5135	1.2735	1.3425	1.452	1.524	3.05e-09	9.4e-09	4.9e-09	2.77e-09	1.66e-10	5.36e-09	Bad UBC	0.569963	1.7545	0.914203	0.517999	0.0310415	1.12769	0.81069	0.261795	1.97864	1.31456	0.433577	0.76071	2.3064	0.481903	0.0644144
VRN2	1	1	9	9	1	111VRN2	006FP3	1.87135	1.88785	1.86674	1.72318	1.88094	2.57e-09	1.17e-08	3.94e-09	2.55e-09	6.09e-11	5.46e-09	Bad UBC	0.470411	2.13589	0.722377	0.467257	0.0111649	2.43184	0.29705	0.367617	1.27104	3.40765	0.138046	1.5644	1.36531	1.03782	0.0107579
VRN2	1	1	9	9	2	112VRN2	009FP1	1.868	1.8849	1.87638	1.74067	1.84771	6.66e-08	4.32e-08	1.05e-07	2.01e-08	1.83e-09	5.34e-08	NaN	1.24604	0.80867	1.95822	0.376758	0.0342144	0.841732	2.32642	0.0920425	4.0933	1.08201	1.15159	0.963693	0.839137	0.507846	0.0673717
VRN2	2	1	9	9	2	212VRN2	010FP1	1.8647	1.8809	1.87955	1.72822	1.85484	3.72e-08	2.53e-08	7.61e-08	1.86e-08	5.74e-10	3.06e-08	Bad UBC	1.21764	0.826101	2.48828	0.609671	0.018781	0.714524	3.48243	0.110966	5.4942	1.045	1.16521	1.0011	0.825191	0.484065	0.0387986
VRN2	3	1	9	9	1	312VRN2311	011FP1	1.875	1.88906	1.8814	1.72278	1.84935	1.23e-07	6.09e-08	9.95e-08	2.64e-08	8.47e-10	8.53e-08	NaN	1.44214	0.714606	1.16708	0.309275	0.0099342	0.780389	1.49551	0.143972	2.14815	1.28092	1.12586	0.830475	0.860478	0.596948	0.0166417
VRN2	1	2	16	16	1	121VRN2	001FP1	1.86774	1.90213	1.87451	1.71119	1.84445	2.16e-07	2.73e-07	8.15e-07	1.23e-07	3.06e-09	2.35e-07	NaN	0.921244	1.16316	3.47422	0.524178	0.0130221	0.880708	3.9448	0.192921	2.71706	1.13909	0.808757	0.889496	1.30766	0.67031	0.019427
VRN2	2	2	16	16	1	221VRN2	001FP2	1.86641	1.8869	1.86963	1.74128	1.85735	4.08e-07	2.81e-07	8.82e-07	5.45e-08	2.09e-09	3.39e-07	NaN	1.20495	0.830542	2.60557	0.16088	0.00616515	0.82159	3.17137	0.0913827	1.76051	1.17879	1.02219	0.907243	0.915457	0.492102	0.0125282
VRN2	3	2	16	16	1	321VRN2	001FP2	1.86641	1.8869	1.86963	1.74128	1.85735	3.64e-07	4.27e-07	4.81e-07	7.01e-08	2.27e-09	3.93e-07	NaN	0.92657	1.08565	1.22347	0.178389	0.00577259	0.82159	1.48915	0.0913827	1.95211	1.17879	0.786038	0.907243	1.19665	0.492102	0.0117305
VRN2	2	2	16	16	2	222VRN2	009FP1	1.868	1.8849	1.87638	1.74067	1.84771	1.3e-08	1.7e-08	3.17e-08	6.62e-09	9.85e-10	1.48e-08	Bad UBC	0.877222	1.14886	2.13962	0.446883	0.0664991	0.841732	NaN	NaN	NaN	NaN	NaN	NaN	NaN	NaN	NaN
VRN2	3	2	16	16	2	322VRN2	010FP2	1.87255	1.89381	1.86992	1.73219	1.84777	3.35e-08	4.52e-08	8.44e-08	3.07e-08	4.57e-10	3.89e-08	NaN	0.861245	1.16309	2.17177	0.789159	0.0117537	1.44712	1.50075	0.202229	3.90231	1.71879	0.501077	0.645878	1.80078	0.919584	0.0127815
VRN2	1	2	16	16	2	122VRN2	012FP1	1.88099	1.89659	1.87632	1.72076	1.85176	2.32e-07	9.38e-08	2.63e-07	5.83e-08	8.49e-10	1.47e-07	NaN	1.58258	0.638974	1.78936	0.397605	0.00578546	0.784247	2.28163	0.146598	2.71221	1.05045	1.50657	0.966884	0.660859	0.531422	0.0108867
VRN2	1	5	37	37	1	151VRN2	002FP2	1.87118	1.89254	1.89011	1.72422	1.87263	2.61e-07	2.42e-07	3e-07	4.75e-08	2.65e-08	2.47e-07	NaN	1.05709	0.980451	1.21458	0.192652	0.107612	0.715707	1.69704	0.162288	1.1871	1.26694	0.834368	0.833998	1.1756	0.456103	0.235939
VRN2	3	5	37	37	1	251VRN2	002FP3	1.88057	1.90335	1.89829	1.7732	1.88871	3.34e-07	3.7e-07	4.14e-07	2.78e-08	1.94e-08	3.44e-07	NaN	0.970617	1.07439	1.20275	0.0806266	0.0562369	0.69207	1.7379	0.0619552	1.30137	1.04029	0.933025	0.981386	1.09477	0.33273	0.169017
VRN2	2	5	37	37	1	C1	003 007 FP1	1.87329	1.89506	1.87916	1.73378	1.87786	1.03e-06	6.24e-07	6.45e-07	1.75e-07	4.48e-08	8.03e-07	NaN	1.28588	0.777679	0.802821	0.218186	0.055743	0.982724	0.816935	0.181607	1.20142	1.17757	1.09198	0.849207	0.915771	0.514649	0.108313
VRN2	1	5	37	37	2	152VRN2	010FP2	1.87255	1.89381	1.86992	1.73219	1.84777	3.26e-07	3.23e-07	8.94e-07	6.8e-08	2.39e-08	3.22e-07	NaN	1.01128	1.00195	2.77468	0.210996	0.0741053	1.44712	1.91738	0.202229	1.04335	1.71879	0.588368	0.645878	1.55129	0.919584	0.0805856
VRN2	3	5	37	37	2	252VRN2	011FP2	1.88374	1.88426	1.87076	1.72274	1.86785	7.05e-07	1.02e-06	1.04e-06	1.98e-07	5.28e-08	8.43e-07	NaN	0.836479	1.21537	1.23912	0.2348	0.0626892	0.937812	1.32129	0.148047	1.58598	1.08108	0.773746	0.96236	1.26291	0.411209	0.152451
VRN2	2	5	37	37	2	352VRN2	012FP2	1.88245	1.87766	1.86989	1.71715	1.85858	2.99e-08	3.63e-08	1.1e-07	1.01e-08	1.63e-09	3.3e-08	NaN	0.907959	1.10146	3.34028	0.307701	0.0493073	0.81933	4.07685	0.130602	2.35601	0.892982	1.01677	1.13319	0.971999	0.43295	0.113887
VRN2	3	7	51	51	2	372VRN2	016FP7	1.89644	1.88728	1.89109	1.70604	1.89299	4.02e-07	6.88e-07	4.81e-07	7.18e-08	2.61e-08	5.13e-07	NaN	0.783481	1.34066	0.936358	0.139835	0.0508338	0.661754	1.41496	0.145177	0.963198	0.87103	0.899488	1.21042	1.10759	0.287181	0.17701
VRN2	1	7	51	51	2	172VRN2	019FP2	1.90057	1.87824	1.87982	1.7141	1.89634	3.69e-07	6.55e-07	9.31e-07	4.82e-08	7.87e-08	4.86e-07	NaN	0.760181	1.34939	1.9181	0.0991654	0.162078	1.10612	1.73408	0.188318	0.526584	0.95616	0.795035	1.05573	1.27816	0.363931	0.445352
VRN2	2	7	51	51	2	272VRN2	020FP7	1.88258	1.90751	1.90077	1.72032	1.92048	8.16e-07	9.81e-07	1.36e-06	1.34e-07	6.05e-08	8.87e-07	NaN	0.920501	1.10596	1.53628	0.151005	0.068167	0.865621	1.77477	0.176728	0.854449	1.16944	0.787131	0.858029	1.28895	0.291904	0.233526
VRN2	1	9	65	65	1	191VRN2	004FP1	1.86813	1.89054	1.87135	1.70021	1.87385	6.19e-07	7.88e-07	1.04e-06	6.81e-08	4.15e-07	6.87e-07	NaN	0.900882	1.14617	1.51527	0.0991327	0.603425	0.876494	1.72878	0.227034	0.436642	1.11778	0.805959	0.921858	1.24333	0.389836	1.5479
VRN2	2	9	65	65	1	291VRN2	004FP1	1.86813	1.89054	1.87135	1.70021	1.87385	7.11e-07	5.99e-07	6.45e-07	1.49e-07	3.49e-07	6.33e-07	NaN	1.12252	0.945338	1.01822	0.235703	0.550879	0.876494	1.1617	0.227034	1.03818	1.11778	1.00425	0.921858	1.02547	0.389836	1.4131
VRN2	3	9	65	65	1	391VRN2	004FP3	1.87999	1.89718	1.86015	1.72219	1.88538	6.96e-07	5.13e-07	7.04e-07	3.58e-08	3.67e-07	5.83e-07	NaN	1.19396	0.88015	1.20697	0.0614635	0.629766	1.28987	0.935726	0.179254	0.342885	1.25463	0.951644	0.833748	1.05565	0.413129	1.52438
VRN2	1	9	65	65	2	192VRN2	013FP2	1.89904	1.90271	1.9034	1.70761	1.889	4.73e-07	6.84e-07	7.84e-07	1.07e-07	4.96e-07	5.68e-07	NaN	0.831529	1.20364	1.37867	0.189033	0.871896	0.764524	1.8033	0.233327	0.810163	0.946251	0.878761	1.13119	1.06405	0.356246	2.44745
VRN2	3	9	65	65	2	392VRN2	014FP6	1.90482	1.89972	1.87325	1.71499	1.87892	6.59e-07	8.41e-07	1.02e-06	4.54e-08	5.77e-07	7.33e-07	NaN	0.899527	1.14793	1.39385	0.0619048	0.787179	1.34073	1.03961	0.204391	0.302873	1.03993	0.864984	1.03698	1.107	0.581865	1.35285
VRN2	2	9	65	65	2	292VRN2	015FP2	1.90353	1.89417	1.87892	1.71913	1.89298	4.08e-07	4.96e-07	9.31e-07	9.31e-08	2.63e-07	4.49e-07	NaN	0.909071	1.10474	2.0731	0.207321	0.586379	1.04908	1.97611	0.205684	1.00796	1.0516	0.864467	0.968382	1.14081	0.366226	1.60114
VRN2	2	11	79	79	1	G12	003 007 FP3	1.5135	1.2735	1.3425	1.452	1.524	7.73e-07	4.5e-07	4.3e-07	9e-08	2.37e-07	5.9e-07	NaN	1.31127	0.76262	0.728901	0.152717	0.401232	1.12769	0.646369	0.261795	0.583345	1.31456	0.997495	0.76071	1.00251	0.481903	0.832598
VRN2	1	11	79	79	1	1111VRN2	006FP3	1.87135	1.88785	1.86674	1.72318	1.88094	1.16e-06	8.86e-07	1.23e-06	3.06e-07	6.56e-07	1.01e-06	NaN	1.1537	0.879283	1.22424	0.303628	0.650519	2.43184	0.50342	0.367617	0.825936	3.40765	0.338562	1.5644	0.562059	1.03782	0.62681
VRN2	3	11	79	79	1	F4	007 008 FP4	1.766	2.023	2.023	1.205	2.5	4.16e-06	3.76e-06	2.58e-06	2.56e-07	2.25e-06	3.96e-06	NaN	1.05261	0.950021	0.652165	0.0646551	0.567556	0.915093	0.712676	0.0815395	0.79293	0.901006	1.16826	1.10987	0.855975	0.46306	1.22567
VRN2	2	11	79	79	2	2112VRN2	015FP3	1.89281	1.89762	1.89592	1.71722	1.92113	1.06e-06	8.75e-07	6.86e-07	8.77e-08	2.78e-07	9.35e-07	NaN	1.13477	0.935875	0.734061	0.0938039	0.297314	0.898213	0.817245	0.195903	0.478828	1.17831	0.96305	0.874314	1.07041	0.28899	1.0288
VRN2	3	14	114	114	2	3142VRN2	015FP3	1.89281	1.89762	1.89592	1.71722	1.92113	1.02e-06	9.18e-07	2.81e-07	2.86e-08	6.44e-07	9.36e-07	NaN	1.08418	0.979907	0.299844	0.0305791	0.688115	0.898213	0.333823	0.195903	0.156093	1.17831	0.920108	0.874314	1.12077	0.28899	2.3811
VRN2	1	14	114	114	1	1141VRN2	016FP1	1.86993	1.90488	1.87282	1.61217	1.88073	9.47e-07	7.74e-07	2.19e-07	1.9e-07	7.95e-07	8.29e-07	NaN	1.14279	0.934326	0.264267	0.229048	0.958978	0.841387	0.314085	1.23341	0.185703	1.11887	1.02137	0.887676	1.05255	0.360456	2.66046
VRN2	2	14	114	114	1	2141VRN2	017FP2	1.88289	1.8966	1.87626	1.68928	1.90023	5.07e-07	4.95e-07	2.31e-07	3.13e-08	7.06e-07	4.93e-07	NaN	1.02697	1.00358	0.469297	0.0634883	1.43079	1.07709	0.43571	0.291836	0.217548	1.1308	0.908182	0.896035	1.12002	0.346238	4.13239
VRN2	3	14	114	114	1	3141VRN2	018FP1	1.87818	1.88808	1.8758	1.73444	1.88665	3.47e-07	4.21e-07	2.53e-07	2.49e-08	5.75e-07	3.78e-07	NaN	0.917233	1.11332	0.667507	0.0657808	1.52016	0.884537	0.75464	0.115537	0.569349	1.0584	0.866619	0.897426	1.24057	0.344665	4.41055
VRN2	1	14	114	114	2	1142VRN2	019FP2	1.90057	1.87824	1.87982	1.7141	1.89634	4.03e-07	7.16e-07	1.78e-07	2.51e-08	6.55e-07	5.26e-07	NaN	0.766791	1.36086	0.339096	0.0478013	1.24555	1.10612	0.306562	0.188318	0.253833	0.95616	0.801949	1.05573	1.28903	0.363931	3.4225
VRN2	2	14	114	114	2	2142VRN2	020FP2	1.90785	1.89962	1.88201	1.68971	1.90013	4.73e-07	4.29e-07	1.83e-07	1.12e-08	5.87e-07	4.43e-07	NaN	1.06774	0.966942	0.412284	0.0252892	1.32366	1.25034	0.329738	0.3489	0.0724827	0.987811	1.08092	1.02211	0.946028	0.418299	3.16439
VRN2	1	15	128	128	1	1151VRN2	013FP1	1.89261	1.89846	1.88809	1.69849	1.89229	7.14e-07	8.7e-07	1.46e-07	2.34e-08	9.08e-07	7.74e-07	NaN	0.922528	1.12361	0.188828	0.0302632	1.17325	1.31204	0.14392	0.362568	0.0834691	1.60658	0.574217	0.981732	1.14452	0.553116	2.12116
VRN2	2	15	128	128	1	2151VRN2	014FP1	1.89092	1.8987	1.87583	1.68581	1.89428	7.56e-07	8.23e-07	2.64e-07	4.4e-08	1.21e-06	7.82e-07	NaN	0.966244	1.05204	0.337054	0.0561881	1.55168	1.19098	0.283007	0.405493	0.138567	1.29674	0.745131	0.844208	1.24619	0.417674	3.71506
VRN2	3	15	128	128	1	3151VRN2	015FP1	1.88579	1.88749	1.87612	1.70145	1.88913	1.73e-08	1.16e-08	4.26e-09	1.6e-09	2.13e-08	1.39e-08	Bad UBC	1.24959	0.839317	0.307488	0.115583	1.53508	1.15935	0.265223	0.301099	0.383869	1.24228	1.00588	0.860931	0.974895	0.463419	3.31252
VRN2	2	15	128	128	2	2152VRN2	017FP3	1.87941	1.89809	1.85559	1.70262	1.89286	6.04e-07	3.85e-07	1.77e-07	1.69e-08	7.53e-07	4.7e-07	NaN	1.28698	0.819046	0.377656	0.0360757	1.60312	1.42603	0.264831	0.239244	0.15079	1.16481	1.10489	0.874626	0.936452	0.398456	4.02332
VRN2	3	15	128	128	2	3152VRN2	018FP2	1.88126	1.88502	1.87016	1.68571	1.89438	2.81e-07	2.76e-07	1.22e-07	2.84e-08	5.58e-07	2.68e-07	NaN	1.04735	1.02989	0.456062	0.10611	2.08491	1.1424	0.399213	0.29813	0.355919	1.16813	0.896607	0.866349	1.18877	0.404033	5.16025
VRN2	1	15	128	128	2	1152VRN2	020FP3	1.8778	1.90697	1.86206	1.71413	1.91182	1.59e-06	1.01e-06	4.04e-07	2.9e-08	1.12e-06	1.23e-06	NaN	1.29477	0.821148	0.328636	0.0236393	0.914808	1.48009	0.222038	0.190239	0.124261	1.2726	1.01742	0.79661	1.0308	0.297273	3.07734
VRN2	1	13	100	100	1	1131VRN2	004FP3	1.87999	1.89718	1.86015	1.72219	1.88538	2.55e-08	2.43e-08	1.41e-08	9.86e-10	3.09e-08	2.39e-08	Bad UBC	1.06479	1.01489	0.59054	0.0411718	1.28957	1.28987	0.457827	0.179254	0.229684	1.25463	0.84869	0.833748	1.21726	0.413129	3.12147
VRN2	2	13	100	100	1	2131VRN2	005FP1	1.87074	1.88866	1.86393	1.73025	1.87136	1.22e-07	7.02e-08	7.17e-08	1.01e-08	1.47e-07	9.06e-08	NaN	1.34209	0.775349	0.791678	0.111511	1.62408	0.87872	0.900945	0.123899	0.900019	0.989991	1.35566	1.01214	0.766046	0.335857	4.83562
VRN2	3	13	100	100	1	3131VRN2	005FP1	1.87074	1.88866	1.86393	1.73025	1.87136	4.7e-07	7.6e-07	4.31e-07	2.32e-08	6.02e-07	5.84e-07	NaN	0.80535	1.30182	0.737554	0.0397605	1.03102	0.87872	0.83935	0.123899	0.320912	0.989991	0.813492	1.01214	1.2862	0.335857	3.06982
VRN2	2	13	100	100	2	2132VRN2	017FP2	1.88289	1.8966	1.87626	1.68928	1.90023	1.52e-07	1.98e-07	1.07e-07	3.25e-08	3.26e-07	1.69e-07	NaN	0.89704	1.16981	0.635231	0.192459	1.92983	1.07709	0.589767	0.291836	0.659477	1.1308	0.793279	0.896035	1.30555	0.346238	5.5737
VRN2	3	13	100	100	2	3132VRN2	018FP2	1.88126	1.88502	1.87016	1.68571	1.89438	2.65e-07	3.47e-07	2.19e-07	7.35e-08	7.09e-07	3.01e-07	NaN	0.88039	1.15255	0.728731	0.24443	2.35796	1.1424	0.637894	0.29813	0.819876	1.16813	0.753678	0.866349	1.33035	0.404033	5.83606
VRN2	1	13	100	100	2	1132VRN2	019FP3	1.89621	1.89562	1.88374	1.70489	1.9038	3.39e-09	5.1e-09	2.32e-09	9.31e-10	2.94e-09	3.98e-09	Bad UBC	0.851132	1.2799	0.582695	0.23387	0.737752	1.05274	0.553505	0.249768	0.93635	1.07757	0.789861	0.937987	1.36452	0.358514	2.05781
VRN2	2	17	156	156	1	2171 VRN2	T17 FP2	1.86756	1.86273	1.86623	1.68869	1.87493	5.51e-08	3.21e-08	1.76e-08	1.84e-09	3.6e-08	4.21e-08	NaN	1.30912	0.763872	0.417361	0.0436254	0.854964	1.06957	0.390213	0.222511	0.19606	1.08395	1.20773	0.922548	0.828002	0.377291	2.26606
VRN2	3	17	156	156	1	3171 VRN2	T17 FP2	1.86756	1.86273	1.86623	1.68869	1.87493	4.5e-06	5.45e-06	2.84e-06	2.53e-07	2.97e-06	4.95e-06	NaN	0.908204	1.10107	0.573551	0.0511123	0.6005	1.06957	0.536244	0.222511	0.229707	1.08395	0.837862	0.922548	1.19351	0.377291	1.59161
VRN2	1	17	156	156	2	1172 VRN2	T17 FP3	1.87141	1.85894	1.87842	1.70743	1.8995	6.41e-07	5.58e-07	1.41e-07	2.83e-08	1.84e-07	5.98e-07	NaN	1.07218	0.932676	0.235595	0.0473516	0.307271	0.995003	0.236778	0.154747	0.305993	1.11643	0.960368	0.895712	1.04127	0.26627	1.15398
VRN2	2	17	156	156	2	2172 VRN2	T17 FP4	1.88299	1.87427	1.85002	1.70246	1.88145	2.53e-12	NaN	NaN	2.31e-09	NaN	NaN	Bad UBC	NaN	NaN	NaN	NaN	NaN	1.50587	NaN	0.211762	NaN	1.01314	NaN	0.987035	NaN	0.357668	NaN
VRN2	3	17	156	156	2	3172 VRN2	T17 FP5	1.8793	1.89836	1.8706	1.69511	1.88532	3.74e-07	4.17e-07	9.34e-08	1.11e-08	1.9e-07	3.95e-07	NaN	0.946697	1.0563	0.236458	0.0280173	0.481543	0.856659	0.276023	0.208815	0.134173	1.02319	0.925245	0.977339	1.0808	0.261137	1.84403
VRN2	22	22C 13WT10	110	100	1	13WT10221VRN2	006FP1	1.87535	1.8943	1.86145	1.71724	1.85957	3.58e-07	3.3e-07	5.55e-07	7.23e-08	6.62e-08	3.36e-07	NaN	1.063	0.980467	1.65111	0.214906	0.196958	1.07759	1.53223	0.164461	1.30673	1.2976	0.819207	0.810554	1.20963	0.573216	0.343602
VRN2	22	22C 13WT10	110	100	3	D2	007 008 FP4	1.766	2.023	2.023	1.205	2.5	4.16e-07	3.31e-07	2.23e-07	1.26e-08	5.25e-08	3.71e-07	NaN	1.1218	0.891424	0.600999	0.0340306	0.141451	0.915093	0.656764	0.0815395	0.417351	0.901006	1.24505	1.10987	0.803179	0.46306	0.30547
VRN2	22	22C 13WT35	135	100	1	13WT3522CVRN21	017FP1	1.87546	1.88935	1.87213	1.69524	1.8794	9.05e-07	5.19e-07	1.04e-06	2.17e-07	1.06e-07	6.8e-07	NaN	1.33101	0.763537	1.52596	0.319817	0.156237	1.0257	1.48773	0.246117	1.29945	1.18187	1.12618	0.843762	0.90492	0.443765	0.352072
VRN2	22	22C 13WT35	135	100	2	13WT3522CVRN22	017FP1	1.87546	1.88935	1.87213	1.69524	1.8794	5.5e-07	5.26e-07	6.56e-07	1.15e-07	3.27e-08	5.36e-07	NaN	1.02474	0.980097	1.22371	0.213559	0.0609971	1.0257	1.19306	0.246117	0.867713	1.18187	0.867051	0.843762	1.16158	0.443765	0.137454
VRN2	22	22C 13WT35	135	100	3	13WT3522CVRN23	017FP1	1.87546	1.88935	1.87213	1.69524	1.8794	2.64e-07	6.48e-07	7.1e-07	9.08e-08	2.36e-08	4.05e-07	NaN	0.652582	1.59996	1.75266	0.224184	0.058189	1.0257	1.70875	0.246117	0.910882	1.18187	0.552159	0.843762	1.89622	0.443765	0.131126
VRN2	22	22C 8WT10	75	65	2	8WT10222VRN2	005FP2	1.87738	1.895	1.87672	1.73259	1.86768	1.95e-07	1.65e-07	1.28e-10	4.3e-10	6.81e-10	1.77e-07	NaN	1.10097	0.934789	0.000726341	0.00243153	0.00385398	0.850419	0.000854097	0.142996	0.0170042	1.08724	1.01262	0.937791	0.996798	0.424808	0.00907229
VRN2	22	22C 8WT10	75	65	1	8WT10221VRN2	005FP3	1.86287	1.89244	1.86343	1.73985	1.84872	7.94e-07	5.68e-07	7.82e-07	6.6e-08	9.55e-09	6.62e-07	NaN	1.19951	0.858948	1.18167	0.0998246	0.014438	0.90024	1.31262	0.110318	0.904878	1.19392	1.00468	0.864443	0.993644	0.476702	0.0302873
VRN2	22	22C 8WT10	75	65	3	8WT10223VRN2	006FP1	1.87535	1.8943	1.86145	1.71724	1.85957	1.16e-08	1.67e-08	2.26e-08	8.1e-10	1.05e-09	1.38e-08	Bad UBC	0.838989	1.20798	1.63863	0.0586865	0.0760964	1.07759	1.52064	0.164461	0.356843	1.2976	0.646572	0.810554	1.49031	0.573216	0.132754
VRN2	22	22C 8WT35	100	65	1	8WT3522CVRN21	016FP1	1.86993	1.90488	1.87282	1.61217	1.88073	9.02e-07	4.8e-07	1.04e-06	1.56e-06	7.71e-08	6.39e-07	NaN	1.41094	0.750652	1.61901	2.44683	0.120522	0.841387	1.92421	1.23341	1.98378	1.11887	1.26103	0.887676	0.845637	0.360456	0.334361
VRN2	22	22C 8WT35	100	65	2	8WT3522CVRN22	016FP1	1.86993	1.90488	1.87282	1.61217	1.88073	1.05e-06	4.53e-07	9.59e-07	1.73e-06	1.83e-08	6.8e-07	NaN	1.55039	0.666813	1.41113	2.54923	0.0268931	0.841387	1.67715	1.23341	2.06681	1.11887	1.38568	0.887676	0.75119	0.360456	0.0746087
VRN2	1	3	23	23	1	131VRN2	001FP3	1.88776	1.90249	1.88946	1.76783	1.87991	6.34e-07	3.87e-07	9.64e-07	1.11e-07	1.42e-08	4.91e-07	NaN	1.29061	0.788165	1.96411	0.226777	0.0288876	0.906749	2.1661	0.0776456	2.92067	1.09732	1.17615	0.95644	0.824062	0.455825	0.0633743
VRN2	1	3	23	23	2	131VRN2132	001FP3	1.88776	1.90249	1.88946	1.76783	1.87991	2.44e-07	3.01e-07	4.54e-07	2.14e-08	2.73e-09	2.66e-07	NaN	0.915616	1.13058	1.70629	0.0804083	0.0102523	0.906749	1.88177	0.0776456	1.03558	1.09732	0.834414	0.95644	1.18207	0.455825	0.0224918
VRN2	2	3	23	23	1	231VRN2	002FP1	1.87608	1.89537	1.88205	1.72199	1.8543	2.08e-07	2.39e-07	4.02e-07	5.67e-08	2.58e-09	2.22e-07	NaN	0.938407	1.07475	1.81203	0.255203	0.0116155	0.75207	2.4094	0.1661	1.53644	1.07309	0.874491	0.946048	1.13604	0.564559	0.0205745
VRN2	3	3	23	23	1	331VRN2	002FP2	1.87118	1.89254	1.89011	1.72422	1.87263	2.04e-07	1.84e-07	2.88e-07	3.94e-08	4.1e-10	1.92e-07	NaN	1.06082	0.959696	1.50181	0.205295	0.00213258	0.715707	2.09836	0.162288	1.265	1.26694	0.837309	0.833998	1.15072	0.456103	0.00467566
VRN2	3	3	23	23	2	332VRN2	009FP2	1.86867	1.88053	1.87899	1.73996	1.85198	3.69e-07	3.03e-07	4.78e-07	5.29e-08	4.4e-09	3.29e-07	NaN	1.1228	0.920184	1.4541	0.160769	0.0133755	0.70459	2.06375	0.0982326	1.63661	1.01537	1.1058	1.02179	0.90056	0.432925	0.0308957
VRN2	2	3	23	23	2	232VRN2	012FP1	1.88099	1.89659	1.87632	1.72076	1.85176	2.86e-07	1.91e-07	7.19e-07	8.37e-08	3.13e-09	2.3e-07	NaN	1.24425	0.830746	3.12456	0.363855	0.0136177	0.784247	3.98415	0.146598	2.48199	1.05045	1.18449	0.966884	0.859199	0.531422	0.0256251
VRN2	8	8C 13WT10	90	100	1	13WT1081VRN2	010FP3	1.88543	1.88372	1.85925	1.72716	1.86435	1.02e-06	9.92e-07	9.66e-07	1.41e-07	1.07e-06	9.99e-07	NaN	1.02083	0.993645	0.967584	0.140894	1.06799	1.19145	0.812107	0.168392	0.836703	0.997579	1.02331	1.08388	0.91675	0.54746	1.95081
VRN2	8	8C 13WT10	90	100	2	13WT1082VRN2	011FP3	1.88881	1.88016	1.85109	1.72167	1.88629	5.55e-07	1.23e-06	5.27e-07	4.5e-08	3.46e-07	8.22e-07	NaN	0.674874	1.49865	0.640437	0.0547356	0.420714	1.26525	0.506172	0.146125	0.37458	1.02585	0.657867	1.00505	1.49111	0.359094	1.1716
VRN2	8	8C 13WT10	90	100	3	13WT1083VRN2	012FP3	1.8895	1.90192	1.85731	1.72452	1.89094	5.86e-06	4.69e-06	2e-06	2.4e-07	4.7e-06	5.22e-06	NaN	1.12165	0.898389	0.383653	0.0460673	0.899567	1.17866	0.325499	0.176063	0.261653	1.0656	1.0526	0.963561	0.932364	0.358734	2.50762
VRN2	8	8C 8WT10	55	65	1	C9	003 007 FP3	1.5135	1.2735	1.3425	1.452	1.524	2.19e-06	1.65e-06	3.18e-06	5.71e-07	1.01e-06	1.9e-06	NaN	1.15078	0.868973	1.67192	0.300594	0.531039	1.12769	1.48261	0.261795	1.1482	1.31456	0.875413	0.76071	1.14232	0.481903	1.10196
VRN2	8	8C 8WT10	55	65	2	H8	007 008 FP3	1.5135	1.2735	1.3425	1.452	1.524	3.25e-07	7.43e-07	6.34e-07	1.5e-07	5.23e-07	4.91e-07	NaN	0.660774	1.51338	1.28984	0.30463	1.06449	1.12769	1.14379	0.261795	1.16362	1.31456	0.502657	0.76071	1.98943	0.481903	2.20894
VRN2	8	8C 8WT10	55	65	3	8WT1083VRN2	009FP3	1.87988	1.88296	1.87016	1.71813	1.87523	8.26e-07	7.53e-07	5.39e-07	1.09e-07	6.37e-07	7.78e-07	NaN	1.06186	0.967591	0.692394	0.140469	0.818706	0.972884	0.711692	0.13649	1.02915	0.935877	1.13462	1.08637	0.890664	0.321839	2.54384

## Sheet: Sweden_14
Gen	notes	planting	plantingName	Timepoint	Timepoint_Cold	pos	tissueCode	Block	plateCode	efficiency_PP2A	efficiency_UBC	efficiency_FLC	efficiency_UNF	efficiency_VIN3	PP2A_N0	UBC_N0	FLC_N0	UNF_N0	VIN3_N0	geoMean	Flag	PP2A	UBC	FLC	UNF	VIN3	FLC_plCtrl	FLC_plateCorrected	UNF_plCtrl	UNF_plateCorrected	PP2A_plCtrl	PP2A_plateCorrected	UBC_plCtrl	UBC_plateCorrected	VIN3_plCtrl	VIN3_plateCorrected
Bro 1-6	NaN	A	North_early	20	20	25	A:1:25	1	S19FP2	1.86801	1.87953	1.87465	1.68557	1.85043	2.53e-07	3.26e-07	7.66e-07	8.83e-08	3.7e-09	2.86e-07	NaN	0.886059	1.14186	2.68035	0.308709	0.0129414	0.716594	3.7404	0.166976	1.84882	0.90444	0.979677	1.10698	1.0315	0.430403	0.030068
Bro 1-6	NaN	A	North_early	20	20	18	A:1:18	1	S19FP3	1.87449	1.88951	1.86458	1.68615	1.8424	2.61e-07	2.96e-07	1.26e-06	1.59e-07	3.16e-09	2.78e-07	NaN	0.938773	1.06535	4.52457	0.57084	0.0113617	1.05866	4.27388	0.172195	3.31508	0.942102	0.996466	1.07432	0.991652	0.575309	0.0197488
Bro 1-6	NaN	A	North_early	20	20	40	A:1:40	2	S21FP1	1.87552	1.88148	1.86313	1.70642	1.84862	3.42e-07	4.17e-07	8.94e-07	9.57e-08	7.04e-09	3.75e-07	NaN	0.910998	1.11224	2.38119	0.25498	0.0187505	0.903163	2.6365	0.13985	1.82324	0.921695	0.988394	1.08793	1.02235	0.497069	0.0377221
Bro 1-6	NaN	A	North_early	20	20	43	A:1:43	2	S21FP2	1.86923	1.87876	1.87234	1.7059	1.84748	2.77e-07	4.73e-07	1.41e-06	8.48e-08	7.25e-09	3.61e-07	NaN	0.766969	1.30746	3.91351	0.234495	0.0200667	0.778243	5.02864	0.123192	1.90349	0.940187	0.815763	1.06962	1.22236	0.441428	0.0454587
Bro 1-6	NaN	A	North_early	20	20	47	A:1:47	2	S21FP3	1.87286	1.89075	1.88901	1.69585	1.85706	2.95e-07	6.98e-07	1.39e-06	1.61e-07	7.71e-09	4.53e-07	NaN	0.649984	1.53867	3.05698	0.354389	0.0170156	0.672323	4.54689	0.147411	2.40409	0.948462	0.685303	1.05538	1.45793	0.412139	0.041286
Bro 1-6	NaN	A	North_early	20	20	56	A:1:56	2	S21FP3	1.87286	1.89075	1.88901	1.69585	1.85706	2.05e-07	3.76e-07	6.03e-07	9.33e-08	5.07e-09	2.76e-07	NaN	0.74427	1.36167	2.1845	0.338304	0.0183797	0.672323	3.24919	0.147411	2.29498	0.948462	0.784713	1.05538	1.29021	0.412139	0.0445959
Bro 1-6	NaN	A	North_early	27	27	24	A:2:24	1	S19FP2	1.86801	1.87953	1.87465	1.68557	1.85043	3.7e-07	3.91e-07	4.85e-07	3.3e-08	8.93e-09	3.8e-07	NaN	0.974191	1.0291	1.27441	0.0869137	0.0234885	0.716594	1.77843	0.166976	0.520517	0.90444	1.07712	1.10698	0.929642	0.430403	0.0545732
Bro 1-6	NaN	A	North_early	27	27	28	A:2:28	1	S19FP3	1.87449	1.88951	1.86458	NaN	1.8424	2.25e-07	5.31e-07	4.38e-07	NaN	1.27e-08	3.45e-07	Missing values	0.650083	1.53826	1.26715	NaN	0.0366713	1.05866	1.19695	0.172195	NaN	0.942102	0.690035	1.07432	1.43185	0.575309	0.063742
Bro 1-6	NaN	A	North_early	27	27	7	A:2:7	1	S19FP3	1.87449	1.88951	1.86458	1.68615	1.8424	1.77e-07	3.85e-07	4.5e-07	1.96e-08	7.24e-09	2.59e-07	NaN	0.683144	1.48762	1.73916	0.0758574	0.0279718	1.05866	1.6428	0.172195	0.440532	0.942102	0.725127	1.07432	1.38471	0.575309	0.0486204
Bro 1-6	NaN	A	North_early	27	27	44	A:2:44	2	S21FP2	1.86923	1.87876	1.87234	1.7059	1.84748	3.04e-07	4.85e-07	5.76e-07	4.11e-08	3.39e-08	3.83e-07	NaN	0.791855	1.26427	1.50227	0.107119	0.0885226	0.778243	1.93034	0.123192	0.869531	0.940187	0.842232	1.06962	1.18198	0.441428	0.200537
Bro 1-6	NaN	A	North_early	27	27	39	A:2:39	2	S21FP3	1.87286	1.89075	1.88901	1.69585	1.85706	1.14e-07	4.07e-07	3.27e-07	1.79e-08	1.01e-08	2.15e-07	NaN	0.530566	1.89272	1.52251	0.0832826	0.0468895	0.672323	2.26456	0.147411	0.56497	0.948462	0.559396	1.05538	1.7934	0.412139	0.113771
Bro 1-6	NaN	A	North_early	27	27	48	A:2:48	2	S21FP3	1.87286	1.89075	1.88901	1.69585	1.85706	8.67e-08	3.99e-07	4.18e-07	2.33e-08	1.22e-08	1.86e-07	NaN	0.466302	2.14733	2.24729	0.125134	0.0657503	0.672323	3.34257	0.147411	0.84888	0.948462	0.491641	1.05538	2.03465	0.412139	0.159534
Bro 1-6	NaN	A	North_early	34	34	32	A:3:32	2	S07FP2	1.87584	1.91111	1.8792	1.75529	NaN	6.26e-07	9.24e-07	6.52e-07	4.71e-08	NaN	7.43e-07	Missing values	0.84217	1.24369	0.877784	0.0634026	NaN	0.966669	0.90805	0.0731118	0.8672	1.00729	0.836076	0.993006	1.25245	NaN	NaN
Bro 1-6	NaN	A	North_early	34	34	32	A:3:32	2	S07FP2	1.89135	1.90497	1.88676	1.6754	1.88526	4.36e-07	8.54e-07	NaN	NaN	1.11e-07	6.11e-07	NaN	0.714673	1.39924	NaN	NaN	0.181608	0.896284	NaN	0.40764	NaN	0.971283	0.735803	1.02957	1.35906	0.352543	0.515138
Bro 1-6	NaN	A	North_early	34	34	35	A:3:35	2	S07FP3	1.8813	1.89029	1.87545	1.71952	NaN	3.81e-07	4.67e-07	1.83e-07	2.21e-08	NaN	4.13e-07	Missing values	0.922418	1.13243	0.443206	0.0534472	NaN	0.883152	0.501846	1.13492	0.0470934	0.89408	1.0317	1.16741	0.970033	NaN	NaN
Bro 1-6	NaN	A	North_early	34	34	38	A:3:38	2	S07FP3	1.8813	1.89029	1.87545	1.71952	NaN	4.68e-07	7.69e-07	2.37e-07	1.73e-08	NaN	5.87e-07	Missing values	0.797258	1.30942	0.404377	0.0295426	NaN	0.883152	0.457879	1.13492	0.0260305	0.89408	0.891708	1.16741	1.12165	NaN	NaN
Bro 1-6	NaN	A	North_early	34	34	35	A:3:35	2	S07FP4	1.86983	1.92335	1.88817	1.72879	1.86823	4.25e-07	5.61e-07	NaN	NaN	9.11e-08	4.88e-07	NaN	0.870683	1.14852	NaN	NaN	0.186619	1.90283	NaN	1.15226	NaN	2.29371	0.379595	1.77297	0.647797	1.44087	0.129518
Bro 1-6	NaN	A	North_early	34	34	38	A:3:38	2	S07FP7	1.282	1.3365	1.23	1.4255	1.4585	3.56e-07	7.44e-07	NaN	NaN	5.24e-08	5.14e-07	NaN	0.69182	1.44546	NaN	NaN	0.101907	2.63034	NaN	2.16132	NaN	2.92661	0.23639	3.07921	0.469427	2.3225	0.0438783
Bro 1-6	NaN	A	North_early	34	34	40	A:3:40	2	S09FP1	1.86916	1.89935	1.88138	1.67909	1.87648	1.18e-07	2.21e-07	1.72e-07	6.41e-08	7.1e-08	1.61e-07	NaN	0.729422	1.37243	1.06486	0.397414	0.440234	0.75922	1.40257	0.24094	1.64943	1.09144	0.668312	0.906344	1.51425	0.367119	1.19916
Bro 1-6	NaN	A	North_early	34	34	51	A:3:51	2	S11FP2	1.88391	1.91791	1.88165	1.73508	1.89323	4.95e-07	7.49e-07	9.84e-07	4.75e-08	1.02e-07	6.08e-07	NaN	0.813187	1.23063	1.61788	0.0780023	0.167942	1.07391	1.50652	0.0971015	0.803306	0.968558	0.839585	1.02597	1.19949	0.329538	0.509629
Bro 1-6	NaN	A	North_early	40	40	1	A:4:1	1	S01FP3	1.88301	1.885	1.87518	1.71088	1.8927	6.52e-08	1.39e-07	1.83e-07	2.7e-08	2.65e-08	9.24e-08	NaN	0.705317	1.50085	1.98428	0.292311	0.286323	0.780991	2.54072	0.123077	2.37502	0.859255	0.820847	1.16722	1.28583	0.228432	1.25343
Bro 1-6	NaN	A	North_early	40	40	20	A:4:20	1	S05FP1	1.87795	1.88563	1.87914	1.69212	1.89248	3.31e-07	2.78e-07	2.01e-07	6.23e-08	1.89e-07	3.01e-07	NaN	1.09861	0.924281	0.668232	0.206936	0.626728	1.01996	0.655155	0.286635	0.72195	1.17999	0.931025	0.957002	0.965809	0.393184	1.59398
Bro 1-6	NaN	A	North_early	40	40	30	A:4:30	2	S07FP1	1.88851	1.89772	1.87539	1.71022	NaN	4.75e-07	4.62e-07	3.29e-07	4.34e-08	NaN	4.65e-07	Missing values	1.02042	0.993991	0.707865	0.0933173	NaN	0.906801	0.780617	0.187765	0.496991	0.9756	1.04594	1.04223	0.953718	NaN	NaN
Bro 1-6	NaN	A	North_early	40	40	30	A:4:30	2	S07FP2	1.89135	1.90497	1.88676	1.6754	1.88526	3.86e-07	7.26e-07	NaN	NaN	2.33e-07	5.29e-07	NaN	0.728712	1.37228	NaN	NaN	0.439502	0.896284	NaN	0.40764	NaN	0.971283	0.750257	1.02957	1.33288	0.352543	1.24666
Bro 1-6	NaN	A	North_early	40	40	38	A:4:38	2	S07FP3	1.8813	1.89029	1.87545	1.71952	NaN	2.93e-07	7.35e-07	3.38e-07	9.27e-07	NaN	4.6e-07	Missing values	0.637714	1.59779	0.73483	2.01571	NaN	0.883152	0.832054	1.13492	1.77608	0.89408	0.713263	1.16741	1.36866	NaN	NaN
Bro 1-6	NaN	A	North_early	40	40	38	A:4:38	2	S07FP7	1.282	1.3365	1.23	1.4255	1.4585	2.24e-07	3.96e-07	NaN	NaN	1.91e-07	2.98e-07	NaN	0.752364	1.32914	NaN	NaN	0.640307	3.63034	NaN	3.16132	NaN	3.92661	0.191607	4.07921	0.325834	3.3225	0.192719
Bro 1-6	NaN	A	North_early	40	40	51	A:4:51	2	S11FP2	1.88391	1.91791	1.88165	1.73508	1.89323	9.25e-08	2.98e-07	3.65e-07	1.53e-08	1.33e-07	1.66e-07	NaN	0.558069	1.79833	2.20071	0.0920726	0.799303	1.07391	2.04924	0.0971015	0.94821	0.968558	0.576185	1.02597	1.75282	0.329538	2.42553
Bro 1-6	NaN	A	North_early	40	40	54	A:4:54	2	S11FP3	1.87206	1.88888	1.86943	1.69799	1.88367	1.96e-07	3.95e-07	4.33e-07	2.66e-08	1.32e-07	2.73e-07	NaN	0.716043	1.44366	1.58453	0.0972464	0.483166	0.859305	1.84396	0.159521	0.609613	0.908194	0.788426	1.10465	1.30689	0.2725	1.77308
Bro 1-6	NaN	A	North_early	48	48	2	A:5:2	1	S01FP3	1.88301	1.885	1.87518	1.71088	1.8927	2.78e-07	9.16e-07	5.76e-07	3.58e-08	2.1e-07	5.02e-07	NaN	0.554979	1.82654	1.14931	0.0713777	0.41785	0.780991	1.4716	0.123077	0.579943	0.859255	0.645883	1.16722	1.56486	0.228432	1.82921
Bro 1-6	NaN	A	North_early	48	48	16	A:5:16	1	S03FP2	1.86441	1.89845	1.87125	1.72048	1.88421	6.42e-07	8.53e-07	5.39e-07	2.87e-08	4.46e-07	7.29e-07	NaN	0.880911	1.1706	0.739497	0.0393899	0.612123	0.894629	0.826596	0.113669	0.346533	1.02516	0.859288	0.985757	1.18752	0.308863	1.98186
Bro 1-6	NaN	A	North_early	48	48	23	A:5:23	1	S05FP2	1.90093	1.91758	1.8843	1.73586	1.9006	1.96e-07	3.08e-07	1.96e-07	7.65e-09	1.23e-07	2.45e-07	NaN	0.800526	1.25986	0.802273	0.0312658	0.504332	1.0641	0.753942	0.113078	0.276497	0.859837	0.93102	1.16664	1.0799	0.317939	1.58626
Bro 1-6	NaN	A	North_early	48	48	27	A:5:27	1	S05FP3	1.86403	1.89692	1.8684	1.70772	1.88508	2.11e-07	3.49e-07	2.26e-07	1.76e-08	1.86e-07	2.7e-07	NaN	0.77837	1.29078	0.833779	0.0651663	0.688191	0.916934	0.909312	0.133641	0.487623	0.970507	0.802024	1.03858	1.24283	0.272766	2.52301
Bro 1-6	NaN	A	North_early	48	48	38	A:5:38	2	S07FP3	1.8813	1.89029	1.87545	1.71952	NaN	6.95e-07	1.17e-06	4.21e-07	2.17e-08	NaN	8.99e-07	Missing values	0.772631	1.29978	0.468658	0.0241672	NaN	0.883152	0.530665	1.13492	0.0212942	0.89408	0.864163	1.16741	1.11339	NaN	NaN
Bro 1-6	NaN	A	North_early	48	48	38	A:5:38	2	S07FP7	1.282	1.3365	1.23	1.4255	1.4585	3.34e-07	6.95e-07	NaN	NaN	2.18e-07	4.82e-07	NaN	0.693594	1.44177	NaN	NaN	0.451811	7.63034	NaN	7.16132	NaN	7.92661	0.087502	8.07921	0.178454	7.3225	0.0617017
Bro 1-6	NaN	A	North_early	48	48	42	A:5:42	2	S09FP2	1.88492	1.9076	1.88819	1.73154	1.89722	1.97e-07	5.62e-07	2.11e-07	2.92e-08	2.09e-07	3.32e-07	NaN	0.595236	1.69488	0.635248	0.0881787	0.630711	0.835514	0.760308	0.107043	0.823771	0.983488	0.605229	1.02985	1.64576	0.31427	2.00691
Bro 1-6	NaN	A	North_early	55	55	7	A:6:7	1	S01FP1	1.8928	1.90667	1.89146	1.71448	1.91039	7.42e-07	1.44e-06	7.32e-07	6.57e-08	5.4e-07	1.03e-06	NaN	0.719501	1.39825	0.709924	0.063711	0.523944	0.805058	0.88183	0.187697	0.339436	0.951672	0.756039	1.05351	1.32723	0.235908	2.22097
Bro 1-6	NaN	A	North_early	55	55	3	A:6:3	1	S01FP3	1.88301	1.885	1.87518	1.71088	1.8927	1.79e-07	5.52e-07	2.53e-07	2.63e-08	1.29e-07	3.14e-07	NaN	0.56987	1.76148	0.807457	0.0837374	0.411082	0.780991	1.03389	0.123077	0.680365	0.859255	0.663214	1.16722	1.50912	0.228432	1.79959
Bro 1-6	NaN	A	North_early	55	55	11	A:6:11	1	S03FP1	1.87074	1.89029	1.87119	1.69306	1.88381	2.02e-07	5.71e-07	3.08e-07	2.14e-08	4.52e-07	3.39e-07	NaN	0.595789	1.68432	0.909855	0.063067	1.33304	0.803525	1.13233	0.216045	0.291916	0.972798	0.612448	1.06054	1.58817	0.332585	4.00811
Bro 1-6	NaN	A	North_early	55	55	28	A:6:28	1	S05FP3	1.86403	1.89692	1.8684	1.70772	NaN	1.07e-10	1.41e-10	5.36e-11	8.89e-09	NaN	1.23e-10	Bad UBC	NaN	NaN	NaN	NaN	NaN	NaN	NaN	NaN	NaN	NaN	NaN	NaN	NaN	NaN	NaN
Bro 1-6	NaN	A	North_early	55	55	45	A:6:45	2	S09FP3	1.86357	1.88885	1.86389	1.68149	1.87692	4.59e-07	6.64e-07	3.27e-07	3.23e-08	4.4e-07	5.37e-07	NaN	0.855618	1.23689	0.609195	0.060141	0.820277	1.08707	0.5604	0.25983	0.231463	1.24057	0.689696	0.996814	1.24084	0.364312	2.25158
Bro 1-6	NaN	A	North_early	55	55	50	A:6:50	2	S11FP1	1.86333	1.89687	1.86847	1.69307	1.88359	1.85e-07	3.76e-07	2.23e-07	1.68e-08	2.24e-07	2.63e-07	NaN	0.703612	1.43093	0.849653	0.0639316	0.851807	1.26842	0.669851	0.272208	0.234863	1.60964	0.437123	0.750453	1.90675	0.463167	1.83909
Bro 1-6	NaN	A	North_early	62	62	5	A:7:5	1	S01FP2	1.89527	1.92001	1.89044	1.70899	1.8958	2.09e-07	4.55e-07	3.64e-07	1.23e-07	6.64e-07	3.08e-07	NaN	0.677798	1.47673	1.17967	0.399139	2.15342	0.89477	1.31841	0.197413	2.02185	1.00475	0.674592	1.00728	1.46605	0.315944	6.81581
Bro 1-6	NaN	A	North_early	62	62	6	A:7:6	1	S01FP2	1.89527	1.92001	1.89044	1.70899	1.8958	2.6e-07	2.86e-07	1.81e-07	1.22e-08	1.62e-07	2.71e-07	NaN	0.96114	1.05641	0.667313	0.045095	0.599005	0.89477	0.745793	0.197413	0.22843	1.00475	0.956594	1.00728	1.04877	0.315944	1.89592
Bro 1-6	NaN	A	North_early	62	62	28	A:7:28	1	S05FP3	1.86403	1.89692	1.8684	1.70772	1.88508	3.29e-07	3.99e-07	1.48e-07	8.23e-09	2.37e-07	3.59e-07	NaN	0.916235	1.10919	0.412512	0.0229122	0.659179	0.916934	0.449882	0.133641	0.171446	0.970507	0.944079	1.03858	1.06798	0.272766	2.41664
Bro 1-6	NaN	A	North_early	62	62	39	A:7:39	2	S09FP1	1.86916	1.89935	1.88138	1.67909	1.87648	1.67e-07	2.06e-07	1.12e-07	3.47e-08	2.12e-07	1.85e-07	NaN	0.901937	1.115	0.608117	0.188048	1.1486	0.75922	0.800976	0.24094	0.780477	1.09144	0.826374	0.906344	1.23021	0.367119	3.12869
Bro 1-6	NaN	A	North_early	62	62	49	A:7:49	2	S11FP1	1.86333	1.89687	1.86847	1.69307	1.88359	6.76e-08	2.26e-07	1.18e-07	1.13e-08	1.6e-07	1.23e-07	NaN	0.550011	1.84065	0.961389	0.0916652	1.29842	1.26842	0.757942	0.272208	0.336746	1.60964	0.341698	0.750453	2.45272	0.463167	2.80335
Bro 1-6	NaN	A	North_early	62	62	51	A:7:51	2	S11FP2	1.88391	1.91791	1.88165	1.73508	1.89323	1.44e-07	4.78e-07	2.21e-07	7.4e-09	3.26e-07	2.62e-07	NaN	0.549673	1.82307	0.844355	0.0282143	1.24279	1.07391	0.78624	0.0971015	0.290565	0.968558	0.567517	1.02597	1.77693	0.329538	3.77132
Bro 1-6	NaN	A	North_early	69	69	2	A:8:2	1	S01FP3	1.88301	1.885	1.87518	1.71088	1.8927	1.13e-07	3.86e-07	1e-07	1.32e-08	2.66e-07	2.08e-07	NaN	0.543837	1.85787	0.482758	0.0636841	1.28263	0.780991	0.618135	0.123077	0.517432	0.859255	0.632916	1.16722	1.5917	0.228432	5.61494
Bro 1-6	NaN	A	North_early	69	69	18	A:8:18	1	S03FP3	1.86867	1.88062	1.86676	1.69751	1.87467	5e-07	4.48e-07	1.32e-07	2.85e-08	7.05e-07	4.56e-07	NaN	1.09731	0.983456	0.290335	0.0625838	1.54684	0.883378	0.328664	0.184232	0.3397	0.967076	1.13467	1.04827	0.938166	0.338163	4.57425
Bro 1-6	NaN	A	North_early	69	69	22	A:8:22	1	S05FP1	1.87795	1.88563	1.87914	1.69212	1.89248	2.61e-07	6.48e-07	1.13e-07	1.58e-08	4.53e-07	4.1e-07	NaN	0.635757	1.58057	0.275609	0.0385706	1.10413	1.01996	0.270215	0.286635	0.134563	1.17999	0.53878	0.957002	1.65159	0.393184	2.80817
Bro 1-6	NaN	A	North_early	69	69	47	A:8:47	2	S09FP3	1.86357	1.88885	1.86389	1.68149	1.87692	4.42e-07	6.69e-07	1.3e-07	2.99e-08	1.33e-06	5.37e-07	NaN	0.822289	1.24604	0.242297	0.05562	2.48025	1.08707	0.222889	0.25983	0.214063	1.24057	0.66283	0.996814	1.25003	0.364312	6.80804
Bro 1-6	NaN	A	North_early	69	69	48	A:8:48	2	S11FP1	1.86333	1.89687	1.86847	1.69307	1.88359	8.91e-08	1.84e-07	7.37e-08	9.1e-09	2.18e-07	1.28e-07	NaN	0.69797	1.44158	0.577525	0.0712619	1.70611	1.26842	0.45531	0.272208	0.261792	1.60964	0.433618	0.750453	1.92094	0.463167	3.68357
Bro 1-6	NaN	A	North_early	69	69	49	A:8:49	2	S11FP1	1.86333	1.89687	1.86847	1.69307	1.88359	4.61e-07	1.02e-06	4.58e-07	5.54e-08	1.2e-06	6.85e-07	NaN	0.672683	1.49111	0.668417	0.0808753	1.75017	1.26842	0.526968	0.272208	0.297108	1.60964	0.417908	0.750453	1.98695	0.463167	3.77871
Bro 1-6	NaN	A	North_early	76	76	7	A:9:7	1	S01FP1	1.8928	1.90667	1.89146	1.71448	1.91039	5.69e-07	1.7e-06	3.04e-07	2.17e-08	5.59e-07	9.83e-07	NaN	0.578546	1.7294	0.308705	0.0220805	0.568309	0.805058	0.383457	0.187697	0.117639	0.951672	0.607925	1.05351	1.64155	0.235908	2.40903
Bro 1-6	NaN	A	North_early	76	76	12	A:9:12	1	S03FP1	1.87074	1.89029	1.87119	1.69306	1.88381	5.55e-07	7.88e-07	8.46e-08	1.85e-08	6.74e-07	6.48e-07	NaN	0.855934	1.21571	0.130498	0.0284956	1.03984	0.803525	0.162407	0.216045	0.131896	0.972798	0.879868	1.06054	1.14631	0.332585	3.12654
Bro 1-6	NaN	A	North_early	76	76	27	A:9:27	1	S05FP3	1.86403	1.89692	1.8684	1.70772	1.88508	3.79e-07	6.23e-07	9.16e-08	4.1e-09	3.88e-07	4.82e-07	NaN	0.786513	1.29202	0.190048	0.00851091	0.804105	0.916934	0.207264	0.133641	0.0636851	0.970507	0.810415	1.03858	1.24403	0.272766	2.94796
Bro 1-6	NaN	A	North_early	76	76	41	A:9:41	2	S09FP2	1.88492	1.9076	1.88819	1.73154	1.89722	1.71e-07	3.32e-07	7.12e-08	4.15e-09	2.89e-07	2.38e-07	NaN	0.717451	1.39478	0.299401	0.0174597	1.21711	0.835514	0.358344	0.107043	0.163109	0.983488	0.729497	1.02985	1.35436	0.31427	3.87281
Bro 1-6	NaN	A	North_early	76	76	45	A:9:45	2	S09FP3	1.86357	1.88885	1.86389	1.68149	1.87692	3.32e-07	5.92e-07	9.49e-08	1.8e-08	3.58e-07	4.42e-07	NaN	0.750303	1.33909	0.214646	0.0407558	0.808956	1.08707	0.197453	0.25983	0.156856	1.24057	0.604803	0.996814	1.34337	0.364312	2.22051
Bro 1-6	NaN	A	North_early	76	76	50	A:9:50	2	S11FP2	1.88391	1.91791	1.88165	1.73508	1.89323	3.9e-07	9.26e-07	2.01e-07	1.41e-08	7.87e-07	6e-07	NaN	0.651139	1.54523	0.336032	0.0235641	1.31322	1.07391	0.312904	0.0971015	0.242675	0.968558	0.672277	1.02597	1.50612	0.329538	3.98503
Bro 1-6	NaN	A	North_early	84	84	8	A:10:8	1	S01FP1	1.8928	1.90667	1.89146	1.71448	1.91039	3.67e-07	9.22e-07	1.29e-07	1.17e-08	4.25e-07	5.76e-07	NaN	0.636473	1.59995	0.224245	0.020372	0.737463	0.805058	0.278545	0.187697	0.108537	0.951672	0.668794	1.05351	1.51868	0.235908	3.12607
Bro 1-6	NaN	A	North_early	84	84	5	A:10:5	1	S01FP2	1.89527	1.92001	1.89044	1.70899	1.8958	6.01e-07	4.96e-07	2.1e-07	5.2e-09	3.93e-07	5.41e-07	NaN	1.10976	0.916486	0.387771	0.00961521	0.725356	0.89477	0.433375	0.197413	0.0487061	1.00475	1.10451	1.00728	0.909861	0.315944	2.29583
Bro 1-6	NaN	A	North_early	84	84	28	A:10:28	1	S05FP3	1.86403	1.89692	1.8684	1.70772	1.88508	4.67e-08	7.93e-08	1.65e-08	8.51e-10	6.14e-08	6.06e-08	NaN	0.769752	1.30795	0.272222	0.0140462	1.01226	0.916934	0.296883	0.133641	0.105104	0.970507	0.793144	1.03858	1.25936	0.272766	3.71109
Bro 1-6	NaN	A	North_early	84	84	42	A:10:42	2	S09FP2	1.88492	1.9076	1.88819	1.73154	1.89722	3.53e-07	5.55e-07	1.69e-07	1.01e-08	7.51e-07	4.43e-07	NaN	0.798225	1.25391	0.382882	0.0228478	1.69642	0.835514	0.45826	0.107043	0.213446	0.983488	0.811627	1.02985	1.21757	0.31427	5.39795
Bro 1-6	NaN	A	North_early	84	84	47	A:10:47	2	S09FP3	1.86357	1.88885	1.86389	1.68149	1.87692	3.35e-07	3.12e-07	8.66e-08	5.72e-09	3.55e-07	3.18e-07	NaN	1.0516	0.981155	0.271902	0.0179754	1.11572	1.08707	0.250124	0.25983	0.0691813	1.24057	0.847673	0.996814	0.984291	0.364312	3.06255
Bro 1-6	NaN	A	North_early	84	84	53	A:10:53	2	S11FP2	1.88391	1.91791	1.88165	1.73508	1.89323	8.14e-08	3.6e-07	9.39e-08	2.62e-09	2.65e-07	1.71e-07	NaN	0.475655	2.10521	0.548701	0.0152935	1.54589	1.07391	0.510936	0.0971015	0.1575	0.968558	0.491096	1.02597	2.05193	0.329538	4.69108
Bro 1-6	NaN	A	North_early	90	90	3	A:11:3	1	S13FP1	1.85646	1.90079	1.86866	1.72772	1.88094	3.6e-07	5.38e-07	5.99e-08	1.52e-09	4.18e-07	4.29e-07	NaN	0.839556	1.25497	0.139697	0.00354774	0.976491	1.0739	0.130083	0.135143	0.0262518	0.982867	0.854191	1.03868	1.20824	0.335415	2.91129
Bro 1-6	NaN	A	North_early	90	90	34	A:11:34	2	S13FP3	1.8662	1.87612	1.85461	1.69329	1.87277	2.61e-07	7.8e-07	6.65e-08	4.61e-09	6.04e-07	4.49e-07	NaN	0.582206	1.73664	0.148122	0.0102737	1.34503	0.973568	0.152143	0.139354	0.0737238	0.942601	0.617659	1.07388	1.61717	0.28792	4.67153
Bro 1-6	NaN	A	North_early	90	90	10	A:11:10	1	S15FP1	1.87166	1.89538	1.87082	1.68553	1.88622	4.47e-07	6.44e-07	7.92e-08	1.24e-08	6.86e-07	5.35e-07	NaN	0.834229	1.20222	0.147962	0.0232385	1.28185	1.10029	0.134476	0.260522	0.0891997	1.33614	0.624357	0.837352	1.43574	0.413829	3.09753
Bro 1-6	NaN	A	North_early	90	90	11	A:11:11	1	S15FP1	1.87166	1.89538	1.87082	1.68553	1.88622	3.67e-07	6.75e-07	8.17e-08	1.57e-08	5e-07	4.97e-07	NaN	0.738167	1.35682	0.164327	0.031579	1.00442	1.10029	0.149349	0.260522	0.121215	1.33614	0.552463	0.837352	1.62037	0.413829	2.42713
Bro 1-6	NaN	A	North_early	90	90	12	A:11:12	1	S15FP1	1.87166	1.89538	1.87082	1.68553	1.88622	3.56e-07	5.75e-07	3.72e-08	5.27e-09	4.16e-07	4.51e-07	NaN	0.78851	1.27582	0.0824869	0.0116828	0.923382	1.10029	0.0749684	0.260522	0.0448438	1.33614	0.590141	0.837352	1.52364	0.413829	2.23131
Bro 1-6	NaN	A	North_early	90	90	50	A:11:50	2	S17FP1	1.87226	1.89406	1.85889	1.70123	1.88181	2.17e-07	6.28e-07	1.18e-07	8.81e-09	4.94e-07	3.69e-07	NaN	0.589378	1.7019	0.318945	0.0238964	1.33876	1.09933	0.290127	0.170267	0.140346	1.10006	0.535769	0.927995	1.83396	0.361745	3.70083
Bro 1-6	NaN	A	North_early	97	97	29	A:12:29	2	S13FP1	1.85646	1.90079	1.86866	1.72772	1.88094	3.73e-07	6.96e-07	7.42e-08	5.99e-09	1.2e-06	5.04e-07	NaN	0.740108	1.38313	0.147377	0.0118933	2.3917	1.0739	0.137235	0.135143	0.0880052	0.982867	0.753009	1.03868	1.33163	0.335415	7.13058
Bro 1-6	NaN	A	North_early	97	97	34	A:12:34	2	S13FP3	1.8662	1.87612	1.85461	1.69329	1.87277	3.73e-08	2.03e-07	1.72e-08	2.9e-09	2.11e-07	8.52e-08	NaN	0.437906	2.3853	0.201856	0.033999	2.47272	0.973568	0.207336	0.139354	0.243975	0.942601	0.464573	1.07388	2.2212	0.28792	8.58823
Bro 1-6	NaN	A	North_early	97	97	16	A:12:16	1	S15FP3	1.8708	1.89634	1.87882	1.69712	1.89071	2.09e-07	4.33e-07	1.44e-08	1.3e-09	4.74e-07	2.99e-07	NaN	0.699741	1.44809	0.0481111	0.00435861	1.58231	0.846294	0.0568491	0.148646	0.0293222	0.926945	0.75489	1.04912	1.38029	0.251935	6.28061
Bro 1-6	NaN	A	North_early	97	97	23	A:12:23	1	S17FP2	1.89719	1.90331	1.89253	1.73438	1.92048	2.62e-07	7.54e-07	1.03e-07	4.98e-09	7.06e-07	4.43e-07	NaN	0.591355	1.7008	0.232485	0.0112382	1.59341	0.884767	0.262764	0.099409	0.11305	0.834293	0.70881	1.21138	1.40402	0.225384	7.06977
Bro 1-6	NaN	A	North_early	97	97	27	A:12:27	1	S17FP3	1.86458	1.883	1.86831	1.69515	1.8802	4.02e-07	7.2e-07	6.54e-08	6.25e-09	4.7e-07	5.35e-07	NaN	0.752308	1.34601	0.122254	0.0116851	0.87976	0.835627	0.146302	0.151873	0.0769396	0.907931	0.828596	1.10404	1.21917	0.280476	3.13666
Bro 1-6	NaN	A	North_early	105	105	5	A:13:5	1	S13FP3	1.8662	1.87612	1.85461	1.69329	1.87277	3.71e-08	1.78e-07	1.6e-08	1.38e-09	2.04e-07	8.04e-08	NaN	0.461336	2.20801	0.198876	0.017128	2.53548	0.973568	0.204275	0.139354	0.12291	0.942601	0.489429	1.07388	2.05611	0.28792	8.8062
Bro 1-6	NaN	A	North_early	105	105	42	A:13:42	2	S15FP2	1.89052	1.91368	1.87958	1.71553	1.90105	1.89e-07	4.95e-07	2.16e-08	2.71e-09	4.08e-07	3.06e-07	NaN	0.619536	1.61937	0.070726	0.00886839	1.33537	1.32286	0.0534646	0.177655	0.0499193	1.06357	0.582507	1.07739	1.50304	0.358694	3.72287
Bro 1-6	NaN	A	North_early	105	105	47	A:13:47	2	S15FP3	1.8708	1.89634	1.87882	1.69712	1.89071	3.18e-07	1.01e-06	3.56e-08	3.16e-09	5.58e-07	5.65e-07	NaN	0.562479	1.78114	0.0629424	0.00559753	0.987865	0.846294	0.0743742	0.148646	0.0376569	0.926945	0.606809	1.04912	1.69775	0.251935	3.92111
Bro 1-6	NaN	A	North_early	105	105	53	A:13:53	2	S17FP2	1.89719	1.90331	1.89253	1.73438	1.92048	1.97e-07	7.46e-07	4.22e-08	1.89e-09	3.33e-07	3.83e-07	NaN	0.51526	1.94997	0.110361	0.00493839	0.869747	0.884767	0.124735	0.099409	0.0496775	0.834293	0.617601	1.21138	1.60972	0.225384	3.85895
Bro 1-6	NaN	A	North_early	105	105	28	A:13:28	1	S17FP3	1.86458	1.883	1.86831	1.69515	1.8802	3.47e-07	4.43e-07	4.21e-08	4.58e-09	3.3e-07	3.87e-07	NaN	0.897218	1.14358	0.108678	0.0118379	0.852695	0.835627	0.130056	0.151873	0.0779459	0.907931	0.9882	1.10404	1.03581	0.280476	3.04017
Bro 1-6	NaN	A	North_early	111	111	1	A:14:1	1	S13FP1	1.85646	1.90079	1.86866	1.72772	1.88094	4.41e-07	4.89e-07	3.78e-08	5.33e-09	8.79e-07	4.61e-07	NaN	0.95705	1.06075	0.0819539	0.0115591	1.90594	1.0739	0.0763139	0.135143	0.0855324	0.982867	0.973733	1.03868	1.02125	0.335415	5.68234
Bro 1-6	NaN	A	North_early	111	111	30	A:14:30	2	S13FP1	1.85646	1.90079	1.86866	1.72772	1.88094	4.74e-07	6.63e-07	5.33e-08	7.87e-09	1.56e-06	5.58e-07	NaN	0.850036	1.18786	0.0956024	0.0141107	2.80394	1.0739	0.0890232	0.135143	0.104413	0.982867	0.864853	1.03868	1.14362	0.335415	8.3596
Bro 1-6	NaN	A	North_early	111	111	20	A:14:20	1	S17FP1	1.87226	1.89406	1.85889	1.70123	1.88181	4.71e-07	7.96e-07	6.47e-08	6.62e-09	1.16e-06	6.11e-07	NaN	0.771468	1.30288	0.105953	0.0108417	1.89191	1.09933	0.09638	0.170267	0.0636748	1.10006	0.701297	0.927995	1.40398	0.361745	5.22994
Bro 1-6	NaN	A	North_early	111	111	51	A:14:51	2	S17FP2	1.89719	1.90331	1.89253	1.73438	NaN	2.77e-07	7.02e-07	5.3e-08	7.34e-09	NaN	5.15e-07	Missing values	0.538005	1.36335	0.102872	0.0142441	NaN	0.884767	0.11627	0.099409	0.143288	0.834293	0.644863	1.21138	1.12546	0.225384	NaN
Bro 1-6	NaN	A	North_early	111	111	54	A:14:54	2	S17FP3	1.86458	1.883	1.86831	1.69515	1.8802	3.21e-07	4.12e-07	6.85e-08	5.99e-09	5.24e-07	3.76e-07	NaN	0.855402	1.09635	0.182433	0.0159562	1.39504	0.835627	0.218318	0.151873	0.105063	0.907931	0.942144	1.10404	0.993037	0.280476	4.97381
Bro 1-6	NaN	A	North_early	161	161	31	A:15:3	1	S19FP1	1.86296	1.86955	1.86241	1.69286	1.8409	1.05e-07	2.17e-07	6.92e-09	8.95e-10	5.22e-07	1.48e-07	NaN	0.711478	1.46861	0.04679	0.00604962	3.53114	0.827606	0.0565366	0.163944	0.0369006	0.965499	0.736902	1.06981	1.37278	0.503696	7.01047
Bro 1-6	NaN	A	North_early	161	161	18	A:15:18	1	S19FP3	1.87449	1.88951	1.86458	1.68615	1.8424	9.96e-08	2.06e-07	6.26e-09	1.64e-09	4.4e-07	1.42e-07	NaN	0.699194	1.44481	0.0439457	0.011508	3.08968	1.05866	0.0415109	0.172195	0.0668313	0.942102	0.742164	1.07432	1.34486	0.575309	5.37047
Bro 1-6	NaN	A	North_early	161	161	47	A:15:47	2	S25FP1	1.86284	1.89194	1.8446	1.68542	1.87822	1.64e-07	2.68e-07	7.4e-09	2.68e-09	6.39e-07	2.08e-07	NaN	0.789073	1.28604	0.0355226	0.0128944	3.0685	1.2778	0.0277999	0.187921	0.0686161	1.10799	0.712165	0.921763	1.3952	0.391541	7.83698
Bro 1-6	NaN	A	North_early	161	161	52	A:15:52	2	S25FP1	1.86284	1.89194	1.8446	1.68542	1.87822	1.16e-07	2.76e-07	5.21e-09	1.34e-09	5.38e-07	1.78e-07	NaN	0.649192	1.55001	0.029229	0.00753008	3.01568	1.2778	0.0228745	0.187921	0.0400705	1.10799	0.585917	0.921763	1.68157	0.391541	7.70208
Bro 1-6	NaN	A	North_early	161	161	44	A:15:44	2	S25FP2	1.86532	1.87729	1.83562	1.68275	1.87911	3.04e-09	9.67e-09	4.03e-10	8.06e-10	2.01e-08	5.28e-09	Bad UBC	0.575517	1.83347	0.076307	0.152791	3.81695	1.2124	0.0629387	0.179085	0.853177	0.85656	0.671893	1.16892	1.56851	0.267068	14.292
Bro 1-6	NaN	A	North_early	161	161	55	A:15:55	2	S25FP2	1.86532	1.87729	1.83562	1.68275	1.87911	2.99e-07	4.1e-07	1.01e-08	1.02e-09	8.79e-07	3.4e-07	NaN	0.8782	1.20334	0.0296367	0.00300223	2.58342	1.2124	0.0244446	0.179085	0.0167643	0.85656	1.02526	1.16892	1.02944	0.267068	9.67324
Bro 1-6	NaN	A	North_early	208	208	5	A:16:5	1	S23FP2	1.86532	1.876	1.8417	1.71616	1.87034	5.22e-07	9.9e-07	2.55e-09	1.09e-09	5.16e-07	7.11e-07	NaN	0.734099	1.39301	0.0035841	0.00153453	0.726634	1.16467	0.00307736	0.110182	0.0139272	0.893445	0.82165	1.13925	1.22275	0.315939	2.29992
Bro 1-6	NaN	A	North_early	208	208	21	A:16:21	1	S23FP1	1.86827	1.87858	1.82917	1.69524	1.89621	4.96e-07	8.45e-07	3.07e-09	7.47e-10	2.92e-07	6.42e-07	NaN	0.773002	1.31631	0.00477783	0.0011638	0.455466	1.36947	0.00348882	0.168292	0.00691533	0.972962	0.794483	1.04483	1.25983	0.262574	1.73462
Bro 1-6	NaN	A	North_early	208	208	25	A:16:25	1	S23FP2	1.86532	1.876	1.8417	1.71616	1.87034	4.9e-07	8.47e-07	3.44e-09	1.39e-09	5.59e-07	6.34e-07	NaN	0.773577	1.33537	0.00542034	0.00219223	0.88112	1.16467	0.00465398	0.110182	0.0198964	0.893445	0.865836	1.13925	1.17215	0.315939	2.78889
Bro 1-6	NaN	A	North_early	208	208	27	A:16:27	1	S23FP3	1.86822	1.88509	1.84888	NaN	1.88034	4.56e-07	7.35e-07	3.4e-09	NaN	4.57e-07	5.74e-07	Missing values	0.795056	1.28036	0.00592042	NaN	0.797421	1.11887	0.00529143	0.146008	NaN	0.917139	0.866887	1.09444	1.16988	0.289103	2.75826
Bro 1-6	NaN	A	North_early	208	208	47	A:16:47	2	S25FP2	1.86532	1.87729	1.83562	1.68275	1.87911	3.21e-07	5.1e-07	1.83e-09	7.86e-10	3.12e-07	3.96e-07	NaN	0.811529	1.28897	0.00461727	0.00198364	0.787619	1.2124	0.00380837	0.179085	0.0110765	0.85656	0.947427	1.16892	1.1027	0.267068	2.94913
Bro 1-6	NaN	A	North_early	208	208	49	A:16:49	2	S25FP1	1.86284	1.89194	1.8446	1.68542	1.87822	4.34e-07	5.61e-07	2.12e-09	5.38e-10	3.44e-07	4.91e-07	NaN	0.884239	1.14246	0.00431666	0.00109601	0.700567	1.2778	0.00337821	0.187921	0.00583232	1.10799	0.798055	0.921763	1.23943	0.391541	1.78926
Bro 1-6	NaN	A	North_early	239	239	3	A:17:3	1	S23FP1	1.86827	1.87858	1.82917	1.69524	1.89621	3.33e-07	6.41e-07	3.66e-09	8.08e-10	2.02e-07	4.55e-07	NaN	0.730158	1.40663	0.00802996	0.00177401	0.443699	1.36947	0.00586357	0.168292	0.0105413	0.972962	0.750449	1.04483	1.34627	0.262574	1.68981
Bro 1-6	NaN	A	North_early	239	239	9	A:17:9	1	S23FP3	1.86822	1.88509	1.84888	NaN	1.88034	2.4e-07	6.46e-07	1.05e-09	NaN	3.54e-07	3.82e-07	Missing values	0.628889	1.69122	0.00274805	NaN	0.926152	1.11887	0.00245609	0.146008	NaN	0.917139	0.685707	1.09444	1.54528	0.289103	3.20354
Bro 1-6	NaN	A	North_early	239	239	19	A:17:19	1	S23FP1	1.86827	1.87858	1.82917	NaN	1.89621	2.07e-07	5.59e-07	5.75e-10	NaN	2.2e-07	3.39e-07	Missing values	0.610865	1.64744	0.00169459	NaN	0.647676	1.36947	0.00123741	0.168292	NaN	0.972962	0.62784	1.04483	1.57675	0.262574	2.46664
Bro 1-6	NaN	A	North_early	239	239	20	A:17:20	1	S23FP1	1.86827	1.87858	1.82917	1.69524	1.89621	6.04e-07	1.22e-06	2.35e-09	1.67e-10	5.38e-07	8.57e-07	NaN	0.704306	1.42809	0.00274574	0.000194748	0.627721	1.36947	0.00200497	0.168292	0.0011572	0.972962	0.723878	1.04483	1.36681	0.262574	2.39065
Bro 1-6	NaN	A	North_early	239	239	22	A:17:22	1	S23FP2	1.86532	1.876	1.8417	NaN	1.87034	9.4e-08	3.71e-07	5.66e-10	NaN	1.8e-07	1.85e-07	Missing values	0.507345	1.99994	0.00305656	NaN	0.969438	1.16467	0.0026244	0.110182	NaN	0.893445	0.567852	1.13925	1.75549	0.315939	3.06844
Bro 1-6	NaN	A	North_early	239	239	37	A:17:37	2	S23FP3	1.86822	1.88509	1.84888	1.69848	1.88034	2.25e-07	5.69e-07	9.93e-10	6.51e-10	2.74e-07	3.57e-07	NaN	0.630357	1.5907	0.00277707	0.00182216	0.767722	1.11887	0.00248204	0.146008	0.0124799	0.917139	0.687308	1.09444	1.45344	0.289103	2.65553
Col FRI(sf2)	NaN	A	North_early	20	20	20	A:1:20	1	S19FP1	1.86296	1.86955	1.86241	1.69286	1.8409	5.61e-07	5.75e-07	7.09e-07	1.2e-07	6.5e-09	5.55e-07	NaN	1.01076	1.03652	1.27824	0.21552	0.0117065	0.827606	1.5445	0.163944	1.3146	0.965499	1.04688	1.06981	0.968889	0.503696	0.0232412
Col FRI(sf2)	NaN	A	North_early	20	20	6	A:1:6	1	S19FP2	1.86801	1.87953	1.87465	1.68557	1.85043	2.17e-07	4.65e-07	3.87e-07	8.4e-08	2.53e-09	3.17e-07	NaN	0.682654	1.4657	1.22016	0.264763	0.00798736	0.716594	1.70272	0.166976	1.58564	0.90444	0.75478	1.10698	1.32405	0.430403	0.0185579
Col FRI(sf2)	NaN	A	North_early	20	20	8	A:1:8	1	S19FP3	1.87449	1.88951	1.86458	1.68615	1.8424	2.91e-07	2.28e-07	4.77e-07	1.08e-07	2.44e-09	2.55e-07	NaN	1.14346	0.894934	1.87369	0.42425	0.00958914	1.05866	1.76988	0.172195	2.46378	0.942102	1.21373	1.07432	0.833022	0.575309	0.0166678
Col FRI(sf2)	NaN	A	North_early	20	20	29	A:1:29	2	S21FP1	1.87552	1.88148	1.86313	1.70642	1.84862	1.28e-07	2.24e-07	3.01e-07	5.83e-08	2.86e-09	1.69e-07	NaN	0.759841	1.32739	1.77821	0.345053	0.0169152	0.903163	1.96887	0.13985	2.4673	0.921695	0.824395	1.08793	1.22011	0.497069	0.03403
Col FRI(sf2)	NaN	A	North_early	20	20	42	A:1:42	2	S21FP2	1.86923	1.87876	1.87234	1.7059	1.84748	9.84e-08	1.35e-07	1.12e-07	2.89e-08	2.18e-09	1.14e-07	NaN	0.860405	1.1845	0.97563	0.252507	0.0190417	0.778243	1.25363	0.123192	2.0497	0.940187	0.915143	1.06962	1.1074	0.441428	0.0431366
Col FRI(sf2)	NaN	A	North_early	20	20	44	A:1:44	2	S21FP2	1.86923	1.87876	1.87234	1.7059	1.84748	1.75e-07	4.59e-07	3.88e-07	7.64e-08	4.74e-09	2.82e-07	NaN	0.620087	1.62814	1.3732	0.27084	0.0167891	0.778243	1.76449	0.123192	2.19852	0.940187	0.659536	1.06962	1.52217	0.441428	0.0380337
Col FRI(sf2)	NaN	A	North_early	27	27	23	A:2:23	1	S19FP2	1.86801	1.87953	1.87465	1.68557	1.85043	2.46e-07	5.74e-07	2.55e-07	2.81e-08	1.28e-08	3.73e-07	NaN	0.658995	1.53652	0.681976	0.0752155	0.0343268	0.716594	0.951691	0.166976	0.450458	0.90444	0.728622	1.10698	1.38802	0.430403	0.079755
[truncated: 2,361 more rows]
