# Supplementary material for: Natural variation in autumn expression is the major adaptive determinant distinguishing Arabidopsis FLC haplotypes
Source: eLife. 2020 Sep 9;9:e57671. doi: 10.7554/eLife.57671 (PMC7518893; doi:10.7554/eLife.57671)
Supplement: Source data 3. [file elife-57671-data3.xlsx]

## Sheet: Key
Columns			Genotype			Amplicons
Gen	Genotype		BRO	Bro1-6		PP2A	At1g13320
Block	Randomisation block		BRON	Bro NIL		UBC	At5g25760
sampling	Number of timepoint at which plants sampled/conditions (e.g. 1 - first sampling, 22C 13WT10 - plants transferred after 13 weeks in field glasshouse (13W) to 22°C long-day glasshouse [or 8C = 8°C long day cabinet] for 10 days (T10)		COL	Col-0		FLC	spliced At5g10140
Timepoint	Days after sowing in field		EDI	Edi-0		UNF	unspliced At5g10140
Timepoint_Cold	Days after sowing in field or cold cabinet		EDIN	Edi NIL		VIN3	At5g57380
Rep	Replicate number		FCAF	fca-9 FRI		CCA1	At2g46830
tissueCode	Individual sample code		FLDF	fld-4 FRI
plateCode	Sample plate and QPCR plate code		FVEF	fve-3 FRI
efficiency_amplicon	QPCR plate-specific amplicon efficiency output from LinReg		LHP	lhp1-3 FRI
Amplicon_N0	N0 expression level per sample output (from LinReg)		LOV	Löv-1
geoMean	geometric mean of PP2A_N0 and UBC_N0		NDX	ndx1-1 FRI
Flag	Flag for high UBC control levels or non-detectable amplicons		NIL1	Lov NIL1
Amplicon	Amplicon corrected to sample geometric mean of controls		NIL2	Lov NIL2
Amplicon_plCtrl	QPCR plate-specific amplicon value for control sample		SDG8	sdg8 FRI
Amplicon_plateCorrected	Sample amplicon corrected to plate-specific control value		SF2	Col FRI
notes	notes from time of sampling		ULL	Ull2-5
planting	A - North Sweden first planting, B- North Sweden second planting, C - South Sweden		ULLN	Ull NIL
plantingName	as above		VAL	val1-2 FRI
pos	position in tray		VAR	Var2-6
			VARN	Var NIL
			VIN3	vin3-4 FRI
			VIN3-1	vin3-1 FRI
			VRN1	vrn1-4 FRI
			VRN2	vrn2-1 FRI
For 48hr experiment
Series	Time and date of sampling	Day in sequence	TimeofDay
481	2016-10-19 13:00:00	1	13
481	2016-10-19 17:00:00	1	17
481	2016-10-19 21:00:00	1	21
481	2016-10-20 01:00:00	1	1
481	2016-10-20 05:00:00	1	5
481	2016-10-20 09:00:00	1	9
481	2016-10-20 13:00:00	2	13
481	2016-10-20 17:00:00	2	17
481	2016-10-20 21:00:00	2	21
481	2016-10-21 01:00:00	2	1
481	2016-10-21 05:00:00	2	5
481	2016-10-21 09:00:00	2	9
482	2016-11-23 13:00:00	1	13
482	2016-11-23 17:00:00	1	17
482	2016-11-23 21:00:00	1	21
482	2016-11-24 01:00:00	1	1
482	2016-11-24 05:00:00	1	5
482	2016-11-24 09:00:00	1	9
482	2016-11-24 13:00:00	2	13
482	2016-11-24 17:00:00	2	17
482	2016-11-24 21:00:00	2	21
482	2016-11-25 01:00:00	2	1
482	2016-11-25 05:00:00	2	5
482	2016-11-25 09:00:00	2	9

## Sheet: Norwich_16
Gen	Timepoint	Timepoint_Cold	Sampling	Block	Rep	tissueCode	plateCode	efficiency_PP2A	efficiency_UBC	efficiency_FLC	efficiency_UNF	efficiency_VIN3	PP2A_N0	UBC_N0	FLC_N0	UNF_N0	VIN3_N0	geoMean	Flag	PP2A	UBC	FLC	UNF	VIN3	PP2A_plCtrl	UBC_plCtrl	FLC_plCtrl	UNF_plCtrl	VIN3_plCtrl	PP2A_plateCorrected	UBC_plateCorrected	FLC_plateCorrected	UNF_plateCorrected	VIN3_plateCorrected
ULL	7	7	1	R1	1	B2	033 FP1	1.88751	1.88481	1.88797	1.73535	1.8235	1.67e-07	4.79e-08	1.93e-07	4.29e-08	8.2e-10	8.93e-08		1.86495	0.536208	2.1593	0.480242	0.00918509	1.08634	0.92052	1.03799	0.0763931	0.595813	1.71672	0.582505	2.08026	6.28646	0.0154161
FLDF	7	7	1	R1	1	B3	033 FP1	1.88751	1.88481	1.88797	1.73535	1.8235	2.06e-07	1.67e-07	5.74e-07	1.06e-07	2.32e-10	1.86e-07		1.11008	0.900833	3.08857	0.567927	0.00124669	1.08634	0.92052	1.03799	0.0763931	0.595813	1.02185	0.978613	2.97552	7.43427	0.00209242
VIN3	7	7	1	R1	1	B4	033 FP1	1.88751	1.88481	1.88797	1.73535	1.8235	1.64e-06	7.6e-07	2.51e-06	4.59e-07	2.85e-09	1.12e-06		1.46964	0.680438	2.24695	0.411282	0.00255284	1.08634	0.92052	1.03799	0.0763931	0.595813	1.35283	0.739189	2.16471	5.38376	0.00428464
LHP	7	7	1	R1	1	C1	033 FP1	1.88751	1.88481	1.88797	1.73535	1.8235	1.13e-06	2.92e-07	7.73e-07	1.79e-07	3.28e-09	5.74e-07		1.96532	0.508824	1.34673	0.312287	0.00571272	1.08634	0.92052	1.03799	0.0763931	0.595813	1.80911	0.552757	1.29743	4.0879	0.00958811
LOV	7	7	1	R1	1	C3	033 FP1	1.88751	1.88481	1.88797	1.73535	1.8235	7.27e-08	6.59e-08	1.79e-07	4.38e-08	7.16e-10	6.92e-08		1.05021	0.952195	2.58632	0.633142	0.0103412	1.08634	0.92052	1.03799	0.0763931	0.595813	0.966735	1.03441	2.49165	8.28796	0.0173565
BRO	7	7	1	R1	1	C4	033 FP1	1.88751	1.88481	1.88797	1.73535	1.8235	6.41e-07	3.32e-07	1.52e-06	2.34e-07	1.22e-09	4.62e-07		1.38914	0.71987	3.29796	0.506014	0.00263983	1.08634	0.92052	1.03799	0.0763931	0.595813	1.27873	0.782025	3.17725	6.62382	0.00443064
SF2	7	7	1	R1	1	D1	033 FP1	1.88751	1.88481	1.88797	1.73535	1.8235	7.95e-07	1.94e-07	6.9e-07	1.86e-07	1.53e-09	3.93e-07		2.02151	0.494681	1.75627	0.473205	0.00389165	1.08634	0.92052	1.03799	0.0763931	0.595813	1.86084	0.537393	1.69198	6.19435	0.00653166
COL	7	7	1	R1	1	D2	033 FP1	1.88751	1.88481	1.88797	1.73535	1.8235	2.06e-07	7.17e-08	3.89e-08	9.5e-09	6.16e-10	1.21e-07		1.69315	0.590616	0.320716	0.0782446	0.00507547	1.08634	0.92052	1.03799	0.0763931	0.595813	1.55858	0.641611	0.308976	1.02424	0.00851857
VAL	7	7	1	R1	1	D3	033 FP1	1.88751	1.88481	1.88797	1.73535	1.8235	2.22e-07	1.27e-07	5.55e-07	1.29e-07	4.41e-09	1.68e-07		1.32241	0.756196	3.30682	0.769128	0.0262453	1.08634	0.92052	1.03799	0.0763931	0.595813	1.2173	0.821488	3.18578	10.068	0.0440496
FVEF	7	7	1	R1	1	D4	033 FP1	1.88751	1.88481	1.88797	1.73535	1.8235	1.36e-06	5.41e-07	1.57e-06	3.77e-07	2.98e-09	8.57e-07		1.58525	0.630814	1.83422	0.439549	0.00348113	1.08634	0.92052	1.03799	0.0763931	0.595813	1.45926	0.68528	1.76708	5.75378	0.00584267
VRN2	7	7	1	R1	1	E1	033 FP1	1.88751	1.88481	1.88797	1.73535	1.8235	1.21e-06	2.9e-07	1.09e-06	2.73e-07	1.42e-08	5.93e-07		2.04638	0.488667	1.84616	0.461084	0.0239266	1.08634	0.92052	1.03799	0.0763931	0.595813	1.88374	0.53086	1.77858	6.03568	0.0401579
VRN5	7	7	1	R1	1	E2	033 FP1	1.88751	1.88481	1.88797	1.73535	1.8235	1.24e-07	4.32e-08	1.51e-07	3.39e-08	3.07e-09	7.33e-08		1.6973	0.589171	2.06425	0.462901	0.0418469	1.08634	0.92052	1.03799	0.0763931	0.595813	1.5624	0.640042	1.98869	6.05946	0.070235
VARN	7	7	1	R1	1	E3	033 FP1	1.88751	1.88481	1.88797	1.73535	1.8235	4.33e-07	2.31e-07	1.26e-06	2.54e-07	1.98e-09	3.16e-07		1.36782	0.731092	3.96983	0.802557	0.00624676	1.08634	0.92052	1.03799	0.0763931	0.595813	1.2591	0.794217	3.82452	10.5056	0.0104844
ULLN	7	7	1	R1	1	F1	033 FP1	1.88751	1.88481	1.88797	1.73535	1.8235	1.85e-07	7.56e-08	2.26e-07	7.86e-08	9.42e-10	1.18e-07		1.56405	0.639365	1.91019	0.664622	0.0079724	1.08634	0.92052	1.03799	0.0763931	0.595813	1.43974	0.694569	1.84027	8.70003	0.0133807
NDX	7	7	1	R1	1	F2	033 FP1	1.88751	1.88481	1.88797	1.73535	1.8235	1.04e-07	4.37e-08	2.38e-07	4.67e-08	1.67e-08	6.74e-08		1.54264	0.648238	3.52472	0.693052	0.248424	1.08634	0.92052	1.03799	0.0763931	0.595813	1.42003	0.704209	3.3957	9.07218	0.41695
VIN3-1	7	7	1	R1	1	F3	033 FP1	1.88751	1.88481	1.88797	1.73535	1.8235	2.72e-07	1.7e-07	4.8e-07	1.4e-07	4.52e-10	2.15e-07		1.26683	0.789374	2.2309	0.650624	0.00210303	1.08634	0.92052	1.03799	0.0763931	0.595813	1.16614	0.85753	2.14924	8.51679	0.00352969
BRON	7	7	1	R1	1	G2	033 FP1	1.88751	1.88481	1.88797	1.73535	1.8235	1.56e-07	7.22e-08	3.58e-07	6.12e-08	2.61e-10	1.06e-07		1.46875	0.68085	3.373	0.577278	0.0024671	1.08634	0.92052	1.03799	0.0763931	0.595813	1.35202	0.739636	3.24953	7.55668	0.00414074
EDI	7	7	1	R1	1	G3	033 FP1	1.88751	1.88481	1.88797	1.73535	1.8235	3.05e-07	1.44e-07	5.15e-07	1.47e-07	4.42e-09	2.1e-07		1.45663	0.686518	2.4562	0.699777	0.0210899	1.08634	0.92052	1.03799	0.0763931	0.595813	1.34085	0.745793	2.3663	9.16022	0.0353968
NIL1	7	7	1	R1	1	G4	033 FP1	1.88751	1.88481	1.88797	1.73535	1.8235	1.66e-06	5.09e-07	2.49e-06	5.38e-07	3.64e-09	9.2e-07		1.80837	0.552984	2.70216	0.584945	0.00395591	1.08634	0.92052	1.03799	0.0763931	0.595813	1.66464	0.60073	2.60325	7.65704	0.00663953
NIL2	7	7	1	R1	1	H1	033 FP1	1.88751	1.88481	1.88797	1.73535	1.8235	3.67e-07	1.88e-07	6.01e-07	1.99e-07	4.84e-09	2.62e-07		1.39758	0.715524	2.29004	0.756867	0.0184333	1.08634	0.92052	1.03799	0.0763931	0.595813	1.2865	0.777304	2.20621	9.90754	0.030938
VAR	7	7	1	R1	1	H2	033 FP1	1.88751	1.88481	1.88797	1.73535	1.8235	5.75e-08	3.47e-08	1.56e-07	3.56e-08	1.49e-11	4.47e-08		1.28755	0.77667	3.49637	0.796426	0.000334075	1.08634	0.92052	1.03799	0.0763931	0.595813	1.18521	0.84373	3.36839	10.4254	0.000560705
EDI	7	7	1	R3	2	F2	36 FP1	1.8914	1.91249	1.87983	1.73534	1.84352	9.43e-07	2.11e-07	3.74e-07	8.2e-08	6.88e-09	4.46e-07		2.11513	0.472784	0.839227	0.183934	0.0154318	1.22439	0.816736	1.37418	0.0841794	0.536378	1.7275	0.57887	0.610712	2.18502	0.0287704
VIN3-1	7	7	1	R3	2	E4	36 FP1	1.8914	1.91249	1.87983	1.73534	1.84352	2.84e-07	7.74e-08	3.03e-07	9.31e-08	4.96e-10	1.48e-07		1.91629	0.521842	2.04086	0.628392	0.00334745	1.22439	0.816736	1.37418	0.0841794	0.536378	1.5651	0.638936	1.48515	7.46491	0.00624083
LHP	7	7	1	R3	2	B3	36 FP1	1.8914	1.91249	1.87983	1.73534	1.84352	1.56e-07	8.65e-08	1.62e-07	5.06e-08	7.56e-10	1.16e-07		1.34153	0.74542	1.39415	0.435836	0.006519	1.22439	0.816736	1.37418	0.0841794	0.536378	1.09567	0.912681	1.01453	5.17746	0.0121537
ULL	7	7	1	R3	2	D2	36 FP1	1.8914	1.91249	1.87983	1.73534	1.84352	1.17e-06	1.83e-07	6.3e-07	1.69e-07	6.32e-10	4.63e-07		2.53134	0.395048	1.36039	0.363942	0.00136371	1.22439	0.816736	1.37418	0.0841794	0.536378	2.06744	0.483691	0.989967	4.32341	0.00254244
VRN2	7	7	1	R3	2	C3	36 FP1	1.8914	1.91249	1.87983	1.73534	1.84352	8.83e-07	2.86e-07	7.18e-07	2.05e-07	3.94e-09	5.03e-07		1.75644	0.569335	1.42882	0.40749	0.00783397	1.22439	0.816736	1.37418	0.0841794	0.536378	1.43455	0.697085	1.03976	4.84073	0.0146053
SF2	7	7	1	R3	2	B4	36 FP1	1.8914	1.91249	1.87983	1.73534	1.84352	1.36e-06	4.24e-07	8.12e-07	2.25e-07	1.06e-09	7.6e-07		1.79197	0.558045	1.06827	0.295392	0.00138925	1.22439	0.816736	1.37418	0.0841794	0.536378	1.46357	0.683262	0.777391	3.50908	0.00259005
VIN3	7	7	1	R3	2	C4	36 FP1	1.8914	1.91249	1.87983	1.73534	1.84352	1.59e-06	4.51e-07	1.1e-06	2.55e-07	7.76e-10	8.47e-07		1.87823	0.532416	1.29884	0.301711	0.000916583	1.22439	0.816736	1.37418	0.0841794	0.536378	1.53402	0.651882	0.945177	3.58415	0.00170884
NIL1	7	7	1	R3	2	D4	36 FP1	1.8914	1.91249	1.87983	1.73534	1.84352	1.33e-06	2.88e-07	1.66e-06	4.83e-07	1.96e-09	6.19e-07		2.14809	0.465529	2.67789	0.780625	0.00316388	1.22439	0.816736	1.37418	0.0841794	0.536378	1.75443	0.569987	1.94872	9.27335	0.00589861
BRON	7	7	1	R3	2	G3	36 FP1	1.8914	1.91249	1.87983	1.73534	1.84352	5.74e-07	2.39e-07	7.96e-07	1.39e-07	5.21e-10	3.7e-07		1.55194	0.644357	2.15064	0.374208	0.00140884	1.22439	0.816736	1.37418	0.0841794	0.536378	1.26752	0.788941	1.56504	4.44536	0.00262658
LOV	7	7	1	R3	2	F3	36 FP1	1.8914	1.91249	1.87983	1.73534	1.84352	1.49e-06	1.6e-07	8.78e-07	2.02e-07	8.26e-10	4.88e-07		3.05563	0.327264	1.79998	0.413255	0.00169377	1.22439	0.816736	1.37418	0.0841794	0.536378	2.49565	0.400698	1.30986	4.90922	0.0031578
VAR	7	7	1	R3	2	H3	36 FP1	1.8914	1.91249	1.87983	1.73534	1.84352	6.65e-07	2e-07	8e-07	1.17e-07	4.08e-10	3.65e-07		1.82368	0.54834	2.19367	0.32206	0.00111787	1.22439	0.816736	1.37418	0.0841794	0.536378	1.48947	0.67138	1.59635	3.82588	0.0020841
SDG8	7	7	1	R3	2	F4	36 FP1	1.8914	1.91249	1.87983	1.73534	1.84352	3.66e-07	1.06e-07	7.55e-08	2.3e-08	1.08e-09	1.97e-07		1.85805	0.538198	0.383528	0.116894	0.00547184	1.22439	0.816736	1.37418	0.0841794	0.536378	1.51754	0.658962	0.279096	1.38863	0.0102014
COL	7	7	1	R3	2	H2	36 FP1	1.8914	1.91249	1.87983	1.73534	1.84352	5.73e-07	2.21e-07	1.22e-07	2.62e-08	1.21e-09	3.56e-07		1.60869	0.621622	0.343964	0.073571	0.0033913	1.22439	0.816736	1.37418	0.0841794	0.536378	1.31388	0.761105	0.250305	0.87398	0.00632259
ULLN	7	7	1	R3	2	H4	36 FP1	1.8914	1.91249	1.87983	1.73534	1.84352	7.65e-07	1.45e-07	7.04e-07	1.09e-07	2.95e-10	3.33e-07		2.29438	0.435848	2.10975	0.327863	0.000885724	1.22439	0.816736	1.37418	0.0841794	0.536378	1.8739	0.533646	1.53528	3.89482	0.0016513
FLDF	7	7	1	R3	2	B2	36 FP1	1.8914	1.91249	1.87983	1.73534	1.84352	8.35e-07	2.08e-07	6.97e-07	1.87e-07	2.31e-10	4.17e-07		2.00131	0.499672	1.67084	0.44779	0.000553275	1.22439	0.816736	1.37418	0.0841794	0.536378	1.63454	0.611791	1.21588	5.31948	0.0010315
NIL2	7	7	1	R3	2	E2	36 FP1	1.8914	1.91249	1.87983	1.73534	1.84352	3.91e-07	1.06e-07	3.5e-07	7.89e-08	2.14e-10	2.03e-07		1.9237	0.519832	1.71883	0.387848	0.00105351	1.22439	0.816736	1.37418	0.0841794	0.536378	1.57115	0.636475	1.25081	4.60741	0.00196412
EDIN	7	7	1	R3	2	G2	36 FP1	1.8914	1.91249	1.87983	1.73534	1.84352	8.02e-07	3.29e-07	1.52e-06	2.38e-07	2.26e-09	5.13e-07		1.56108	0.640582	2.96402	0.463557	0.00439575	1.22439	0.816736	1.37418	0.0841794	0.536378	1.27499	0.784319	2.15694	5.50677	0.00819524
VAL	7	7	1	R3	2	G4	36 FP1	1.8914	1.91249	1.87983	1.73534	1.84352	2.47e-07	9.64e-08	3.1e-07	5.4e-08	1.74e-09	1.54e-07		1.6004	0.624844	2.01072	0.350047	0.011252	1.22439	0.816736	1.37418	0.0841794	0.536378	1.3071	0.76505	1.46321	4.15834	0.0209777
EDI	7	7	1	R2	1	H4	37 FP1	1.88213	1.86887	1.87048	1.71904	1.84444	7.14e-08	4.54e-08	6.76e-08	1.8e-08	2.1e-09	5.69e-08		1.25425	0.797286	1.18748	0.316473	0.0368656	1.01063	0.989479	1.10333	0.0723364	0.389291	1.24106	0.805764	1.07627	4.37501	0.0946993
VIN3-1	7	7	1	R2	1	F1	37 FP1	1.88213	1.86887	1.87048	1.71904	1.84444	3.72e-08	3.23e-08	7.53e-08	1.47e-08	5.38e-10	3.47e-08		1.0736	0.931443	2.1739	0.424255	0.0155217	1.01063	0.989479	1.10333	0.0723364	0.389291	1.06231	0.941347	1.97031	5.86503	0.0398717
VARN	7	7	1	R2	1	E4	37 FP1	1.88213	1.86887	1.87048	1.71904	1.84444	8.84e-08	4.74e-08	1.28e-07	2.69e-08	3.78e-10	6.47e-08		1.36637	0.731868	1.98228	0.416345	0.00583996	1.01063	0.989479	1.10333	0.0723364	0.389291	1.35199	0.73965	1.79664	5.75567	0.0150015
EDIN	7	7	1	R2	1	G4	37 FP1	1.88213	1.86887	1.87048	1.71904	1.84444	4.92e-08	4e-08	8.03e-08	1.92e-08	3.77e-10	4.44e-08		1.10863	0.90201	1.8082	0.431934	0.00849243	1.01063	0.989479	1.10333	0.0723364	0.389291	1.09697	0.911601	1.63886	5.97118	0.0218151
COL	7	7	1	R2	1	C1	37 FP1	1.88213	1.86887	1.87048	1.71904	1.84444	4.53e-08	2.58e-08	7.39e-09	1.31e-09	2.07e-11	3.42e-08		1.32666	0.753774	0.216324	0.0384305	0.000606876	1.01063	0.989479	1.10333	0.0723364	0.389291	1.3127	0.761789	0.196065	0.531274	0.00155893
NDX	7	7	1	R2	1	B4	37 FP1	1.88213	1.86887	1.87048	1.71904	1.84444	1.18e-07	8.52e-08	1.92e-07	4.7e-08	1.05e-08	1e-07		1.1759	0.850413	1.91601	0.469379	0.105012	1.01063	0.989479	1.10333	0.0723364	0.389291	1.16353	0.859455	1.73657	6.48883	0.269751
BRON	7	7	1	R2	1	F2	37 FP1	1.88213	1.86887	1.87048	1.71904	1.84444	2.17e-07	7.07e-08	1.94e-07	3.39e-08	4.12e-10	1.24e-07		1.75274	0.570536	1.56989	0.274052	0.0033236	1.01063	0.989479	1.10333	0.0723364	0.389291	1.7343	0.576602	1.42286	3.78857	0.00853758
SDG8	7	7	1	R2	1	D4	37 FP1	1.88213	1.86887	1.87048	1.71904	1.84444	3.77e-08	3.38e-08	8.94e-09	2.52e-09	0	3.57e-08		1.05626	0.946738	0.250757	0.0705615	0	1.01063	0.989479	1.10333	0.0723364	0.389291	1.04515	0.956805	0.227273	0.975462	0
VRN5	7	7	1	R2	1	B2	37 FP1	1.88213	1.86887	1.87048	1.71904	1.84444	1.72e-07	5.83e-08	9.9e-08	2.83e-08	1.1e-09	1e-07		1.72055	0.58121	0.987952	0.282085	0.010993	1.01063	0.989479	1.10333	0.0723364	0.389291	1.70245	0.58739	0.895427	3.89963	0.0282385
LHP	7	7	1	R2	1	E2	37 FP1	1.88213	1.86887	1.87048	1.71904	1.84444	9.55e-08	4.75e-08	7.45e-08	2.04e-08	4.05e-10	6.73e-08		1.41783	0.705304	1.10586	0.302895	0.00601991	1.01063	0.989479	1.10333	0.0723364	0.389291	1.40291	0.712804	1.00229	4.18731	0.0154638
NIL1	7	7	1	R2	1	C2	37 FP1	1.88213	1.86887	1.87048	1.71904	1.84444	2.17e-07	4.41e-08	1.84e-07	4.19e-08	5.7e-10	9.77e-08		2.21588	0.451288	1.88442	0.428584	0.00583517	1.01063	0.989479	1.10333	0.0723364	0.389291	2.19257	0.456087	1.70794	5.92488	0.0149892
FCAF	7	7	1	R2	1	C3	37 FP1	1.88213	1.86887	1.87048	1.71904	1.84444	1.68e-07	1.33e-07	2.54e-07	6.6e-08	1.13e-09	1.5e-07		1.1237	0.88992	1.6934	0.440664	0.00756665	1.01063	0.989479	1.10333	0.0723364	0.389291	1.11187	0.899382	1.5348	6.09186	0.019437
VIN3	7	7	1	R2	1	H2	37 FP1	1.88213	1.86887	1.87048	1.71904	1.84444	5.52e-08	3.19e-08	6.84e-08	1.53e-08	1.89e-10	4.19e-08		1.3163	0.759706	1.62995	0.364137	0.00450964	1.01063	0.989479	1.10333	0.0723364	0.389291	1.30245	0.767783	1.4773	5.03394	0.0115842
VAR	7	7	1	R2	1	F4	37 FP1	1.88213	1.86887	1.87048	1.71904	1.84444	1.11e-06	3.49e-07	1.08e-06	2.24e-07	5.72e-10	6.23e-07		1.7866	0.559721	1.73451	0.358975	0.000917042	1.01063	0.989479	1.10333	0.0723364	0.389291	1.76781	0.565672	1.57206	4.96258	0.00235567
VAL	7	7	1	R2	1	H1	37 FP1	1.88213	1.86887	1.87048	1.71904	1.84444	3.03e-08	2.45e-08	9.14e-08	1.64e-08	1.63e-09	2.72e-08		1.11177	0.899463	3.35448	0.602329	0.0598791	1.01063	0.989479	1.10333	0.0723364	0.389291	1.10008	0.909027	3.04032	8.32677	0.153816
LOV	7	7	1	R2	1	G3	37 FP1	1.88213	1.86887	1.87048	1.71904	1.84444	7.28e-08	3.98e-08	1.53e-07	3.53e-08	1.35e-10	5.39e-08		1.35165	0.739834	2.83217	0.656316	0.00250451	1.01063	0.989479	1.10333	0.0723364	0.389291	1.33743	0.7477	2.56693	9.07311	0.00643351
NIL2	7	7	1	R2	1	G2	37 FP1	1.88213	1.86887	1.87048	1.71904	1.84444	1.58e-07	5.89e-08	1.53e-07	2.91e-08	1.39e-10	9.64e-08		1.63606	0.611223	1.58895	0.302371	0.00144165	1.01063	0.989479	1.10333	0.0723364	0.389291	1.61885	0.617722	1.44014	4.18007	0.00370327
SF2	7	7	1	R2	1	D3	37 FP1	1.88213	1.86887	1.87048	1.71904	1.84444	3.03e-08	2.94e-08	5.06e-08	1.52e-08	6.25e-11	2.98e-08		1.01494	0.985285	1.69626	0.510906	0.00209576	1.01063	0.989479	1.10333	0.0723364	0.389291	1.00426	0.995761	1.5374	7.06292	0.00538352
ULL	7	7	1	R1	2	E4	38 FP1	1.8723	1.89096	1.87275	1.74619	1.87518	9.91e-08	3.69e-08	1.26e-07	1.9e-08	2.03e-10	6.04e-08		1.63919	0.610057	2.07731	0.314947	0.00335819	1.17761	0.849178	1.26654	0.0476635	0.253838	1.39197	0.718408	1.64014	6.60772	0.0132296
NDX	7	7	1	R1	2	B3	38 FP1	1.8723	1.89096	1.87275	1.74619	1.87518	4.78e-08	2.96e-08	1.26e-07	1.54e-08	1.38e-09	3.76e-08		1.27151	0.786467	3.36186	0.408255	0.0367281	1.17761	0.849178	1.26654	0.0476635	0.253838	1.07974	0.926151	2.65435	8.56536	0.144691
VRN5	7	7	1	R1	2	F3	38 FP1	1.8723	1.89096	1.87275	1.74619	1.87518	3.76e-08	3.6e-08	6.15e-08	9.56e-09	4.62e-10	3.68e-08		1.02079	0.979635	1.67228	0.259821	0.0125584	1.17761	0.849178	1.26654	0.0476635	0.253838	0.866831	1.15363	1.32035	5.45116	0.0494742
LOV	7	7	1	R1	2	G4	38 FP1	1.8723	1.89096	1.87275	1.74619	1.87518	3.87e-07	6.91e-08	3.32e-07	3.98e-08	1.83e-10	1.64e-07		2.36625	0.42261	2.02723	0.243185	0.00112166	1.17761	0.849178	1.26654	0.0476635	0.253838	2.00937	0.497669	1.6006	5.10213	0.00441878
BRO	7	7	1	R1	2	D3	38 FP1	1.8723	1.89096	1.87275	1.74619	1.87518	8.34e-08	4.91e-08	1.55e-07	1.57e-08	2.93e-10	6.4e-08		1.30393	0.766915	2.42246	0.245353	0.00457912	1.17761	0.849178	1.26654	0.0476635	0.253838	1.10727	0.903126	1.91265	5.14761	0.0180395
VAR	7	7	1	R1	2	F4	38 FP1	1.8723	1.89096	1.87275	1.74619	1.87518	1.58e-06	6.66e-07	2.06e-06	2.13e-07	2.61e-10	1.03e-06		1.54197	0.648523	2.00726	0.207715	0.000254188	1.17761	0.849178	1.26654	0.0476635	0.253838	1.3094	0.763707	1.58484	4.35796	0.00100138
BRON	7	7	1	R1	2	E1	38 FP1	1.8723	1.89096	1.87275	1.74619	1.87518	1.77e-07	7.72e-08	3.12e-07	4.58e-08	8.46e-10	1.17e-07		1.51475	0.660176	2.667	0.391339	0.00723859	1.17761	0.849178	1.26654	0.0476635	0.253838	1.28629	0.77743	2.10573	8.21046	0.0285166
SDG8	7	7	1	R1	2	G3	38 FP1	1.8723	1.89096	1.87275	1.74619	1.87518	1.1e-07	7.84e-08	3.19e-08	1.54e-09	1.65e-10	9.27e-08		1.18285	0.845419	0.344426	0.0166057	0.0017748	1.17761	0.849178	1.26654	0.0476635	0.253838	1.00445	0.995573	0.271942	0.348395	0.00699185
COL	7	7	1	R1	2	H1	38 FP1	1.8723	1.89096	1.87275	1.74619	1.87518	1.79e-07	4.03e-08	2.68e-08	4.13e-09	3.41e-10	8.49e-08		2.106	0.474834	0.316149	0.0486122	0.00402145	1.17761	0.849178	1.26654	0.0476635	0.253838	1.78837	0.559169	0.249615	1.0199	0.0158426
VIN3	7	7	1	R3	1	G2	39 FP1	1.9258	1.88793	1.88728	1.70527	1.84309	8.27e-07	3.43e-07	9.33e-07	1.74e-07	3.28e-10	5.32e-07		1.55324	0.643815	1.75343	0.326177	0.00061547	0.955017	1.0471	1.40106	0.142389	0.573284	1.6264	0.614854	1.2515	2.29075	0.00107359
SF2	7	7	1	R3	1	E2	39 FP1	1.9258	1.88793	1.88728	1.70527	1.84309	8.98e-07	1.78e-07	6.5e-07	1.53e-07	1.78e-10	3.99e-07		2.24822	0.444797	1.62772	0.38304	0.000446866	0.955017	1.0471	1.40106	0.142389	0.573284	2.35411	0.424788	1.16178	2.69009	0.000779485
VIN3	7	7	1	R2	2	G4	40 FP1	1.87207	1.85173	1.89853	1.70413	1.81768	2.28e-08	5.01e-08	8.13e-08	1.81e-08	2.35e-13	3.38e-08		0.67481	1.4819	2.40483	0.53567	6.96e-06	1.00089	0.999108	0.830476	0.0758175	0.35112	0.674209	1.48322	2.89572	7.06526	1.98e-05
VIN3	13	13	2	R1	1	G7	34 FP2	1.887	1.906	1.887	1.758	1.884	2.59e-06	5.7e-07	2.44e-06	1.32e-07	8.39e-10	1.22e-06		2.13384	0.468638	2.00627	0.108411	0.000690171	1.11716	0.895131	1.21766	0.0518166	0.32288	1.91007	0.523541	1.64764	2.0922	0.00213755
SF2	7	7	1	R2	2	H1	40 FP1	1.87207	1.85173	1.89853	1.70413	1.81768	5.31e-08	3.54e-08	6.08e-08	1.44e-08	3.99e-11	4.33e-08		1.22459	0.816601	1.40296	0.33254	0.000921009	1.00089	0.999108	0.830476	0.0758175	0.35112	1.2235	0.817329	1.68935	4.38606	0.00262306
SF2	13	13	2	R1	1	F7	34 FP2	1.887	1.906	1.887	1.758	1.884	3.89e-06	8.54e-07	3.09e-06	2.31e-07	2.55e-09	1.82e-06		2.13428	0.468542	1.69473	0.126975	0.00139744	1.11716	0.895131	1.21766	0.0518166	0.32288	1.91046	0.523434	1.39179	2.45047	0.00432806
VIN3	13	13	2	R2	2	B10	37 FP3	1.89376	1.89035	1.87733	1.7121	1.85846	1.24e-06	3.33e-07	1e-06	2.33e-07	1.76e-09	6.42e-07		1.92736	0.518845	1.55864	0.363167	0.00274233	1.15903	0.862792	1.24862	0.11741	0.37378	1.66291	0.601355	1.24829	3.09314	0.00733677
VIN3	13	13	2	R2	1	B3	41 FP1	1.89023	1.88812	1.9013	1.73901	1.84621	1.65e-06	1.18e-06	3.99e-06	3.5e-07	1.73e-09	1.39e-06		1.18347	0.84497	2.86838	0.251857	0.00124574	1.0889	0.918361	1.1708	0.0588638	0.323463	1.08686	0.920084	2.44993	4.27863	0.00385126
SF2	13	13	2	R2	2	B9	37 FP3	1.89376	1.89035	1.87733	1.7121	1.85846	2.21e-06	3.2e-07	1.33e-06	1.76e-07	9.67e-10	8.41e-07		2.63039	0.380171	1.5847	0.209426	0.00115039	1.15903	0.862792	1.24862	0.11741	0.37378	2.26948	0.440629	1.26916	1.78372	0.00307773
SF2	13	13	2	R2	1	B2	41 FP1	1.89023	1.88812	1.9013	1.73901	1.84621	2.9e-06	5.71e-07	1.81e-06	2.33e-07	7e-10	1.29e-06		2.25396	0.443663	1.40559	0.180744	0.000543901	1.0889	0.918361	1.1708	0.0588638	0.323463	2.06995	0.483103	1.20054	3.07055	0.0016815
SF2	13	13	2	R3	2	C4	41 FP1	1.89023	1.88812	1.9013	1.73901	1.84621	2.2e-06	1.01e-06	3.22e-06	2.73e-07	1.22e-09	1.49e-06		1.47468	0.678114	2.15673	0.182918	0.000816453	1.0889	0.918361	1.1708	0.0588638	0.323463	1.35429	0.738396	1.84211	3.10747	0.0025241
SF2	13	13	2	R1	2	G2	41 FP1	1.89023	1.88812	1.9013	1.73901	1.84621	3.3e-06	7.55e-07	2.3e-06	2.51e-07	3.78e-09	1.58e-06		2.09033	0.478393	1.45953	0.159025	0.00239483	1.0889	0.918361	1.1708	0.0588638	0.323463	1.91968	0.520921	1.24661	2.70157	0.00740372
VIN3	13	13	2	R3	2	D4	41 FP1	1.89023	1.88812	1.9013	1.73901	1.84621	3.2e-06	1.01e-06	3.19e-06	1.66e-07	1.47e-09	1.8e-06		1.78281	0.560912	1.77373	0.0922156	0.000815475	1.0889	0.918361	1.1708	0.0588638	0.323463	1.63726	0.610775	1.51498	1.56659	0.00252108
VIN3	13	13	2	R1	2	F2	41 FP1	1.89023	1.88812	1.9013	1.73901	1.84621	5.71e-06	1.18e-06	3.13e-06	2.47e-07	2.02e-09	2.6e-06		2.19725	0.455115	1.20417	0.0950949	0.000776159	1.0889	0.918361	1.1708	0.0588638	0.323463	2.01787	0.495573	1.0285	1.61551	0.00239953
VIN3	13	13	2	R3	1	H4	42 FP1	1.90308	1.88404	1.88973	1.70096	1.849	2e-06	4.13e-07	1.17e-06	1.33e-07	6.3e-10	9.1e-07		2.20052	0.454439	1.28707	0.145749	0.000693011	1.03003	0.970847	1.29221	0.126543	0.347439	2.13636	0.468085	0.996028	1.15178	0.00199463
VIN3	20	20	3	R2	2	D4	35 FP1	1.8921	1.91644	1.891	1.76309	1.88975	2.56e-06	7.94e-07	1.58e-06	7.64e-08	7.19e-10	1.43e-06		1.79511	0.557069	1.10917	0.0535955	0.000504016	1.21879	0.820484	1.26755	0.054357	0.288352	1.47286	0.678951	0.875046	0.98599	0.00174792
SF2	13	13	2	R3	1	F4	42 FP1	1.90308	1.88404	1.88973	1.70096	1.849	1.78e-06	3.62e-07	9.75e-07	1.64e-07	8.32e-10	8.01e-07		2.21601	0.451262	1.2174	0.204515	0.00103898	1.03003	0.970847	1.29221	0.126543	0.347439	2.1514	0.464813	0.94211	1.61618	0.0029904
VIN3	20	20	3	R1	2	B5	39 FP2	1.8818	1.90418	1.88201	1.74043	1.87166	1.68e-06	1.62e-07	7.83e-07	2.7e-08	1.09e-09	5.21e-07		3.22485	0.310092	1.50422	0.0519287	0.00209055	1.16095	0.86136	1.24269	0.0570198	0.332428	2.77776	0.360002	1.21045	0.910714	0.00628873
NIL2	7	7	1	R3	1	D2	39 FP1	1.9258	1.88793	1.88728	1.70527	1.84309	6.92e-07	2.27e-07	7.78e-07	1.78e-07	4.22e-10	3.96e-07		1.7476	0.572213	1.96503	0.448569	0.00106575	0.955017	1.0471	1.40106	0.142389	0.573284	1.82992	0.546473	1.40252	3.1503	0.00185902
VAL	7	7	1	R3	1	C2	39 FP1	1.9258	1.88793	1.88728	1.70527	1.84309	4.38e-07	1.01e-07	3.87e-07	9.74e-08	2.75e-09	2.1e-07		2.08427	0.479785	1.84213	0.463239	0.0130856	0.955017	1.0471	1.40106	0.142389	0.573284	2.18244	0.458202	1.31481	3.25333	0.0228256
BRO	7	7	1	R3	1	H2	39 FP1	1.9258	1.88793	1.88728	1.70527	1.84309	5.16e-07	2.1e-07	1.05e-06	2.38e-07	3.35e-10	3.29e-07		1.56788	0.637802	3.20036	0.722232	0.00101731	0.955017	1.0471	1.40106	0.142389	0.573284	1.64174	0.609111	2.28423	5.07224	0.00177454
VRN5	7	7	1	R3	1	H1	39 FP1	1.9258	1.88793	1.88728	1.70527	1.84309	6.6e-07	1.71e-07	3.87e-07	1.53e-07	3.05e-09	3.36e-07		1.96393	0.509184	1.14982	0.455676	0.00905679	0.955017	1.0471	1.40106	0.142389	0.573284	2.05643	0.486279	0.820672	3.20022	0.0157981
EDIN	7	7	1	R3	1	D3	39 FP1	1.9258	1.88793	1.88728	1.70527	1.84309	8.1e-07	2.77e-07	9.51e-07	1.63e-07	7.62e-10	4.74e-07		1.70934	0.58502	2.00875	0.343721	0.00160937	0.955017	1.0471	1.40106	0.142389	0.573284	1.78986	0.558704	1.43373	2.41395	0.00280728
VARN	7	7	1	R3	1	B1	39 FP1	1.9258	1.88793	1.88728	1.70527	1.84309	4.95e-07	1.76e-07	1.2e-06	2.24e-07	1e-09	2.95e-07		1.67591	0.596691	4.04736	0.758198	0.00340072	0.955017	1.0471	1.40106	0.142389	0.573284	1.75485	0.56985	2.88877	5.32483	0.005932
SF2	20	20	3	R2	2	D3	35 FP1	1.8921	1.91644	1.891	1.76309	1.88975	3.06e-06	4.52e-07	1.23e-06	9.38e-08	1.49e-09	1.17e-06		2.60133	0.384418	1.04561	0.0798199	0.00127048	1.21879	0.820484	1.26755	0.054357	0.288352	2.13435	0.468526	0.824904	1.46844	0.004406
FLDF	7	7	1	R3	1	B2	39 FP1	1.9258	1.88793	1.88728	1.70527	1.84309	1.26e-07	4.82e-08	1.06e-07	2.41e-08	4.98e-10	7.81e-08		1.61998	0.617291	1.36079	0.308706	0.00637679	0.955017	1.0471	1.40106	0.142389	0.573284	1.69629	0.589523	0.971253	2.16804	0.0111233
VAR	7	7	1	R3	1	C3	39 FP1	1.9258	1.88793	1.88728	1.70527	1.84309	8.32e-07	4.18e-07	1.99e-06	3.19e-07	4.91e-10	5.9e-07		1.41065	0.708895	3.37154	0.541413	0.000833359	0.955017	1.0471	1.40106	0.142389	0.573284	1.47709	0.677006	2.40641	3.80235	0.00145366
NDX	7	7	1	R3	1	G3	39 FP1	1.9258	1.88793	1.88728	1.70527	1.84309	3.57e-07	2.1e-07	6.4e-07	1.84e-07	1.93e-08	2.74e-07		1.30381	0.766984	2.33718	0.671953	0.0705098	0.955017	1.0471	1.40106	0.142389	0.573284	1.36522	0.732482	1.66814	4.71914	0.122993
LHP	7	7	1	R3	1	G4	39 FP1	1.9258	1.88793	1.88728	1.70527	1.84309	4.67e-07	1.52e-07	3.2e-07	8.56e-08	9.95e-10	2.66e-07		1.75424	0.570046	1.20346	0.321878	0.00373904	0.955017	1.0471	1.40106	0.142389	0.573284	1.83687	0.544404	0.85896	2.26055	0.00652213
EDI	7	7	1	R3	1	B3	39 FP1	1.9258	1.88793	1.88728	1.70527	1.84309	6.09e-07	2.18e-07	3.29e-07	6.53e-08	7.45e-09	3.65e-07		1.66977	0.598887	0.902954	0.17902	0.0204455	0.955017	1.0471	1.40106	0.142389	0.573284	1.74842	0.571947	0.644477	1.25726	0.0356639
SDG8	7	7	1	R3	1	E3	39 FP1	1.9258	1.88793	1.88728	1.70527	1.84309	9.75e-07	2.4e-07	1.42e-07	2.25e-08	7.17e-10	4.84e-07		2.01526	0.496215	0.293925	0.0465868	0.00148102	0.955017	1.0471	1.40106	0.142389	0.573284	2.11018	0.473893	0.209787	0.32718	0.0025834
NIL1	7	7	1	R3	1	G1	39 FP1	1.9258	1.88793	1.88728	1.70527	1.84309	4.25e-07	2.17e-07	1.01e-06	3.07e-07	5.67e-10	3.04e-07		1.3981	0.715257	3.32179	1.01006	0.00186543	0.955017	1.0471	1.40106	0.142389	0.573284	1.46395	0.683082	2.37091	7.09367	0.00325394
VIN3-1	7	7	1	R3	1	F3	39 FP1	1.9258	1.88793	1.88728	1.70527	1.84309	1.16e-06	3.8e-07	1.02e-06	2.25e-07	0	6.65e-07		1.75059	0.571237	1.52716	0.338465	0	0.955017	1.0471	1.40106	0.142389	0.573284	1.83304	0.545541	1.09	2.37704	0
LOV	7	7	1	R3	1	D1	39 FP1	1.9258	1.88793	1.88728	1.70527	1.84309	7.36e-07	2.1e-07	9.39e-07	1.72e-07	5.77e-10	3.93e-07		1.86987	0.534796	2.38567	0.436021	0.00146629	0.955017	1.0471	1.40106	0.142389	0.573284	1.95795	0.510739	1.70276	3.06218	0.0025577
FCAF	7	7	1	R3	1	E1	39 FP1	1.9258	1.88793	1.88728	1.70527	1.84309	7.37e-07	2.35e-07	4.9e-07	1.4e-07	6.76e-10	4.16e-07		1.7699	0.565003	1.17673	0.337261	0.001622	0.955017	1.0471	1.40106	0.142389	0.573284	1.85327	0.539588	0.83988	2.36859	0.0028293
ULL	7	7	1	R3	1	H3	39 FP1	1.9258	1.88793	1.88728	1.70527	1.84309	7.94e-07	2.63e-07	8.8e-07	2.57e-07	1.09e-09	4.57e-07		1.73846	0.57522	1.92726	0.562873	0.00238098	0.955017	1.0471	1.40106	0.142389	0.573284	1.82035	0.549345	1.37557	3.95306	0.00415323
COL	7	7	1	R3	1	C1	39 FP1	1.9258	1.88793	1.88728	1.70527	1.84309	4.61e-07	1.59e-07	9.16e-08	2.31e-08	3.1e-10	2.7e-07		1.7044	0.586717	0.338462	0.0854883	0.00114561	0.955017	1.0471	1.40106	0.142389	0.573284	1.78468	0.560324	0.241575	0.600385	0.00199833
ULLN	7	7	1	R3	1	E4	39 FP1	1.9258	1.88793	1.88728	1.70527	1.84309	7.76e-07	1.75e-07	9.7e-07	2.44e-07	4.32e-10	3.69e-07		2.10334	0.475435	2.63048	0.661503	0.00116985	0.955017	1.0471	1.40106	0.142389	0.573284	2.20241	0.454048	1.87749	4.64574	0.00204061
ULL	7	7	1	R2	2	H3	40 FP1	1.87207	1.85173	1.89853	1.70413	1.81768	8.06e-08	5.41e-08	1.49e-07	3.27e-08	2.03e-10	6.6e-08		1.22022	0.819523	2.25025	0.494982	0.00307771	1.00089	0.999108	0.830476	0.0758175	0.35112	1.21913	0.820254	2.70959	6.52859	0.00876539
SF2	20	20	3	R1	2	E7	39 FP2	1.8818	1.90418	1.88201	1.74043	1.87166	1.45e-06	2.76e-07	1.15e-06	2.77e-08	9.14e-10	6.34e-07		2.29535	0.435663	1.80962	0.0436458	0.00144234	1.16095	0.86136	1.24269	0.0570198	0.332428	1.97712	0.505785	1.45622	0.765451	0.0043388
VIN3	20	20	3	R3	2	G8	41 FP2	1.89515	1.88584	1.8893	1.70197	1.83167	1.33e-06	5.36e-07	1.46e-06	1.15e-07	8.53e-10	8.43e-07		1.57254	0.635913	1.73496	0.13604	0.00101171	1.05934	0.94398	1.30203	0.114947	0.404734	1.48445	0.673651	1.3325	1.18349	0.00249969
NIL2	7	7	1	R2	2	F3	40 FP1	1.87207	1.85173	1.89853	1.70413	1.81768	7.94e-08	6.14e-08	1.82e-07	4.46e-08	1.62e-10	6.98e-08		1.13683	0.879639	2.60148	0.638121	0.00232077	1.00089	0.999108	0.830476	0.0758175	0.35112	1.13582	0.880424	3.13251	8.41654	0.00660962
VIN3-1	7	7	1	R2	2	H2	40 FP1	1.87207	1.85173	1.89853	1.70413	1.81768	1.42e-07	9.51e-08	1.91e-07	4.46e-08	1.14e-11	1.16e-07		1.22314	0.817565	1.64237	0.38318	9.79e-05	1.00089	0.999108	0.830476	0.0758175	0.35112	1.22205	0.818295	1.97762	5.05398	0.000278777
EDI	7	7	1	R2	2	E1	40 FP1	1.87207	1.85173	1.89853	1.70413	1.81768	4.4e-08	3.19e-08	5.1e-08	1.02e-08	7.17e-10	3.74e-08		1.17481	0.851205	1.36173	0.272079	0.0191522	1.00089	0.999108	0.830476	0.0758175	0.35112	1.17376	0.851964	1.63969	3.58861	0.054546
BRON	7	7	1	R2	2	D4	40 FP1	1.87207	1.85173	1.89853	1.70413	1.81768	5.84e-08	3.05e-08	1.25e-07	2.04e-08	2.2e-10	4.22e-08		1.38315	0.722985	2.97198	0.483802	0.00521206	1.00089	0.999108	0.830476	0.0758175	0.35112	1.38192	0.72363	3.57864	6.38114	0.0148441
NDX	7	7	1	R2	2	B3	40 FP1	1.87207	1.85173	1.89853	1.70413	1.81768	1.01e-07	5.45e-08	1.85e-07	2.77e-08	2.49e-09	7.41e-08		1.3612	0.734643	2.4956	0.373805	0.0336098	1.00089	0.999108	0.830476	0.0758175	0.35112	1.35999	0.735299	3.00502	4.93033	0.0957217
LOV	7	7	1	R2	2	E2	40 FP1	1.87207	1.85173	1.89853	1.70413	1.81768	6.73e-08	3.44e-08	1.46e-07	1.93e-08	1.8e-10	4.81e-08		1.39858	0.715009	3.03336	0.40023	0.00374515	1.00089	0.999108	0.830476	0.0758175	0.35112	1.39734	0.715647	3.65256	5.27887	0.0106663
COL	7	7	1	R2	2	D1	40 FP1	1.87207	1.85173	1.89853	1.70413	1.81768	1.16e-07	6.96e-08	3.15e-08	3.85e-09	1.48e-10	8.99e-08		1.29134	0.77439	0.350369	0.0428115	0.00164641	1.00089	0.999108	0.830476	0.0758175	0.35112	1.29019	0.775081	0.42189	0.564665	0.00468902
VAL	7	7	1	R2	2	E3	40 FP1	1.87207	1.85173	1.89853	1.70413	1.81768	8.34e-08	4.16e-08	1.29e-07	2.84e-08	8.32e-10	5.89e-08		1.41654	0.705945	2.19143	0.482894	0.0141346	1.00089	0.999108	0.830476	0.0758175	0.35112	1.41528	0.706575	2.63876	6.36916	0.0402557
LOV	20	20	3	R2	2	G4	35 FP1	1.8921	1.91644	1.891	1.76309	1.88975	1.42e-06	5.81e-07	1.07e-06	2e-07	1.12e-09	9.07e-07		1.56009	0.640988	1.18485	0.220324	0.0012335	1.21879	0.820484	1.26755	0.054357	0.288352	1.28003	0.781232	0.934757	4.05329	0.00427774
COL	20	20	3	R2	2	H1	35 FP1	1.8921	1.91644	1.891	1.76309	1.88975	2.59e-06	2.58e-07	3.07e-08	3.22e-09	6.81e-10	8.17e-07		3.16508	0.315948	0.0376114	0.00393396	0.000833073	1.21879	0.820484	1.26755	0.054357	0.288352	2.5969	0.385075	0.0296725	0.0723726	0.00288908
BRO	20	20	3	R2	2	C2	35 FP1	1.8921	1.91644	1.891	1.76309	1.88975	4.17e-06	3.4e-07	1.57e-06	1.48e-07	1.6e-09	1.19e-06		3.50417	0.285374	1.3221	0.12456	0.00134225	1.21879	0.820484	1.26755	0.054357	0.288352	2.87512	0.347812	1.04304	2.29152	0.00465489
VIN3	20	20	3	R3	1	H10	41 FP3	1.8933	1.88914	1.91039	1.73986	1.84365	2.12e-06	9.76e-07	2.62e-06	1.42e-07	0	1.44e-06		1.47213	0.679286	1.82002	0.0986939	0	1.07618	0.929214	1.04511	0.0601524	0.230516	1.36793	0.731033	1.74146	1.64073	0
FCAF	20	20	3	R2	2	H2	35 FP1	1.8921	1.91644	1.891	1.76309	1.88975	1.99e-06	4.4e-07	1.07e-06	5.82e-08	9.49e-10	9.34e-07		2.12608	0.470348	1.14793	0.0623222	0.00101515	1.21879	0.820484	1.26755	0.054357	0.288352	1.74442	0.573257	0.905631	1.14653	0.00352053
ULL	20	20	3	R2	2	C4	35 FP1	1.8921	1.91644	1.891	1.76309	1.88975	2.13e-06	6.47e-07	2.01e-06	1.26e-07	8.16e-10	1.17e-06		1.81208	0.551852	1.71717	0.107658	0.000695739	1.21879	0.820484	1.26755	0.054357	0.288352	1.48678	0.672594	1.35472	1.98058	0.00241281
VIN3-1	20	20	3	R2	2	F2	35 FP1	1.8921	1.91644	1.891	1.76309	1.88975	2.19e-06	5.06e-07	1.41e-06	6.89e-08	0	1.05e-06		2.08146	0.480431	1.34035	0.0654474	0	1.21879	0.820484	1.26755	0.054357	0.288352	1.70781	0.585546	1.05743	1.20403	0
EDIN	20	20	3	R2	2	B2	35 FP1	1.8921	1.91644	1.891	1.76309	1.88975	2.35e-06	2.2e-07	8.87e-07	8.87e-08	1.18e-09	7.2e-07		3.26963	0.305845	1.23161	0.123196	0.00164379	1.21879	0.820484	1.26755	0.054357	0.288352	2.68268	0.372762	0.971646	2.26642	0.00570064
SDG8	20	20	3	R2	2	D2	35 FP1	1.8921	1.91644	1.891	1.76309	1.88975	2.54e-06	3.64e-07	9.95e-08	9.02e-09	1.14e-09	9.61e-07		2.63835	0.379025	0.10345	0.0093866	0.00118948	1.21879	0.820484	1.26755	0.054357	0.288352	2.16472	0.461953	0.0816143	0.172684	0.0041251
NDX	20	20	3	R2	2	G3	35 FP1	1.8921	1.91644	1.891	1.76309	1.88975	2.01e-06	3.8e-07	1.07e-06	6.25e-08	1.2e-08	8.74e-07		2.3028	0.434254	1.2198	0.0715021	0.0137465	1.21879	0.820484	1.26755	0.054357	0.288352	1.88941	0.529266	0.962331	1.31542	0.0476725
BRON	20	20	3	R2	2	G1	35 FP1	1.8921	1.91644	1.891	1.76309	1.88975	2.51e-06	3.41e-07	1.39e-06	8.01e-08	9.2e-10	9.25e-07		2.71045	0.368942	1.5055	0.0866495	0.000995295	1.21879	0.820484	1.26755	0.054357	0.288352	2.22388	0.449664	1.18772	1.59408	0.00345167
FVEF	20	20	3	R2	2	E1	35 FP1	1.8921	1.91644	1.891	1.76309	1.88975	1.92e-06	3.77e-07	1.48e-06	1.28e-07	1.88e-09	8.51e-07		2.25387	0.443682	1.74216	0.150185	0.00221384	1.21879	0.820484	1.26755	0.054357	0.288352	1.84926	0.540757	1.37443	2.76294	0.00767755
SF2	20	20	3	R3	2	F5	41 FP2	1.89515	1.88584	1.8893	1.70197	1.83167	1.47e-06	5.18e-07	1.31e-06	8.24e-08	2.54e-09	8.73e-07		1.68484	0.593529	1.49693	0.0943836	0.00291063	1.05934	0.94398	1.30203	0.114947	0.404734	1.59045	0.628752	1.14969	0.821102	0.00719146
NIL1	20	20	3	R2	2	H3	35 FP1	1.8921	1.91644	1.891	1.76309	1.88975	2.53e-06	4.52e-07	1.54e-06	1.04e-07	1.03e-09	1.07e-06		2.36725	0.422432	1.43821	0.0975705	0.00096613	1.21879	0.820484	1.26755	0.054357	0.288352	1.94229	0.514857	1.13464	1.79499	0.00335052
VAL	20	20	3	R2	2	H4	35 FP1	1.8921	1.91644	1.891	1.76309	1.88975	1.44e-06	4.67e-07	1.3e-06	1.4e-07	1.82e-09	8.21e-07		1.75719	0.569089	1.57814	0.169869	0.00221421	1.21879	0.820484	1.26755	0.054357	0.288352	1.44175	0.693602	1.24503	3.12506	0.00767885
FLDF	20	20	3	R2	2	C1	35 FP1	1.8921	1.91644	1.891	1.76309	1.88975	2.19e-06	3.57e-07	1.85e-06	1.75e-07	1.38e-09	8.85e-07		2.47679	0.403749	2.09271	0.197629	0.00156031	1.21879	0.820484	1.26755	0.054357	0.288352	2.03216	0.492086	1.65099	3.63576	0.00541113
VRN2	20	20	3	R2	2	C3	35 FP1	1.8921	1.91644	1.891	1.76309	1.88975	2.64e-06	3.77e-07	1.33e-06	1.36e-07	2.61e-09	9.98e-07		2.64616	0.377906	1.33262	0.136	0.00262075	1.21879	0.820484	1.26755	0.054357	0.288352	2.17113	0.460589	1.05134	2.50199	0.0090887
VAR	20	20	3	R2	2	F3	35 FP1	1.8921	1.91644	1.891	1.76309	1.88975	2.53e-06	4.18e-07	1.66e-06	1.43e-07	2.11e-10	1.03e-06		2.46053	0.406417	1.61793	0.138588	0.000204816	1.21879	0.820484	1.26755	0.054357	0.288352	2.01882	0.495338	1.27642	2.54959	0.0007103
NIL2	20	20	3	R2	2	E2	35 FP1	1.8921	1.91644	1.891	1.76309	1.88975	2.35e-06	2.78e-07	1.31e-06	1.01e-07	1.22e-09	8.08e-07		2.90927	0.343729	1.61582	0.124561	0.00151357	1.21879	0.820484	1.26755	0.054357	0.288352	2.38701	0.418934	1.27476	2.29153	0.00524904
LHP	20	20	3	R2	2	D1	35 FP1	1.8921	1.91644	1.891	1.76309	1.88975	3.23e-06	2.46e-07	7.07e-07	6.17e-08	1.63e-09	8.9e-07		3.6237	0.275961	0.794302	0.069303	0.00182849	1.21879	0.820484	1.26755	0.054357	0.288352	2.97319	0.336339	0.626643	1.27496	0.00634118
VRN5	20	20	3	R2	2	G2	35 FP1	1.8921	1.91644	1.891	1.76309	1.88975	2.4e-06	5.32e-07	9.16e-07	1.38e-07	3.29e-09	1.13e-06		2.12271	0.471095	0.811723	0.122548	0.00291375	1.21879	0.820484	1.26755	0.054357	0.288352	1.74165	0.574168	0.640386	2.25451	0.0101048
EDI	20	20	3	R2	2	F4	35 FP1	1.8921	1.91644	1.891	1.76309	1.88975	1.58e-06	6.07e-07	1.18e-06	1.11e-07	4.35e-09	9.79e-07		1.61168	0.62047	1.2036	0.112912	0.00443865	1.21879	0.820484	1.26755	0.054357	0.288352	1.32236	0.756224	0.949547	2.07723	0.0153932
VARN	20	20	3	R2	2	B1	35 FP1	1.8921	1.91644	1.891	1.76309	1.88975	3.4e-06	3.44e-07	2.29e-06	1.26e-07	1.83e-09	1.08e-06		3.14567	0.317897	2.11848	0.116275	0.00169169	1.21879	0.820484	1.26755	0.054357	0.288352	2.58097	0.387451	1.67132	2.13909	0.00586673
EDIN	20	20	3	R1	2	G6	39 FP2	1.8818	1.90418	1.88201	1.74043	1.87166	2.34e-06	3.92e-07	1.45e-06	4.52e-08	1.85e-09	9.57e-07		2.4419	0.409517	1.51425	0.0472051	0.00193178	1.16095	0.86136	1.24269	0.0570198	0.332428	2.10336	0.47543	1.21853	0.827872	0.00581114
NIL1	20	20	3	R1	2	C5	39 FP2	1.8818	1.90418	1.88201	1.74043	1.87166	2.24e-06	2.9e-07	2.41e-06	9.44e-08	2.13e-09	8.06e-07		2.77664	0.360148	2.99689	0.117225	0.00264206	1.16095	0.86136	1.24269	0.0570198	0.332428	2.39169	0.418115	2.41162	2.05587	0.00794777
VRN2	20	20	3	R1	2	F8	39 FP2	1.8818	1.90418	1.88201	1.74043	1.87166	3.7e-06	9.06e-07	2.93e-06	8.04e-08	4.39e-09	1.83e-06		2.0219	0.494584	1.60178	0.0438897	0.00239464	1.16095	0.86136	1.24269	0.0570198	0.332428	1.74159	0.574189	1.28897	0.769728	0.00720349
FCAF	20	20	3	R1	2	E5	39 FP2	1.8818	1.90418	1.88201	1.74043	1.87166	2.51e-06	4.17e-07	1.27e-06	6.6e-08	1.96e-09	1.02e-06		2.45503	0.407327	1.2438	0.064509	0.00191181	1.16095	0.86136	1.24269	0.0570198	0.332428	2.11466	0.472889	1.00089	1.13134	0.00575106
SF2	20	20	3	R3	1	G9	41 FP3	1.8933	1.88914	1.91039	1.73986	1.84365	4.04e-06	7.03e-07	2.54e-06	1.64e-07	9.67e-10	1.68e-06		2.39628	0.417313	1.50566	0.0973685	0.000574398	1.07618	0.929214	1.04511	0.0601524	0.230516	2.22666	0.449104	1.44067	1.6187	0.0024918
BRO	20	20	3	R1	2	E6	39 FP2	1.8818	1.90418	1.88201	1.74043	1.87166	2.01e-06	2.63e-07	1.3e-06	4.12e-08	1.41e-09	7.28e-07		2.76396	0.3618	1.78681	0.0566053	0.00193121	1.16095	0.86136	1.24269	0.0570198	0.332428	2.38076	0.420033	1.43786	0.992732	0.00580943
VRN5	20	20	3	R1	2	H6	39 FP2	1.8818	1.90418	1.88201	1.74043	1.87166	2.64e-06	4.54e-07	1.38e-06	1.12e-07	6.51e-09	1.1e-06		2.4126	0.414491	1.25989	0.101832	0.00593823	1.16095	0.86136	1.24269	0.0570198	0.332428	2.07811	0.481205	1.01384	1.7859	0.0178632
VARN	20	20	3	R1	2	C8	39 FP2	1.8818	1.90418	1.88201	1.74043	1.87166	1.94e-06	9.76e-07	5.35e-06	1.58e-07	2.45e-09	1.38e-06		1.40873	0.709859	3.89072	0.114924	0.00177984	1.16095	0.86136	1.24269	0.0570198	0.332428	1.21343	0.824113	3.13089	2.01551	0.00535406
BRON	20	20	3	R1	2	B7	39 FP2	1.8818	1.90418	1.88201	1.74043	1.87166	2.88e-06	5.42e-07	3.31e-06	8.95e-08	1.2e-09	1.25e-06		2.30441	0.43395	2.64963	0.0716881	0.000961012	1.16095	0.86136	1.24269	0.0570198	0.332428	1.98493	0.503796	2.13218	1.25725	0.00289089
VIN3-1	20	20	3	R1	2	D7	39 FP2	1.8818	1.90418	1.88201	1.74043	1.87166	2.04e-06	3.39e-07	1.31e-06	4.94e-08	0	8.31e-07		2.45498	0.407335	1.58166	0.059483	0	1.16095	0.86136	1.24269	0.0570198	0.332428	2.11462	0.472897	1.27277	1.0432	0
FVEF	20	20	3	R1	2	H8	39 FP2	1.8818	1.90418	1.88201	1.74043	1.87166	3.65e-06	1.03e-06	2.76e-06	1.01e-07	4.32e-09	1.94e-06		1.88128	0.531552	1.41964	0.0517844	0.00222586	1.16095	0.86136	1.24269	0.0570198	0.332428	1.62046	0.617107	1.14239	0.908184	0.00669576
VAR	20	20	3	R1	2	H5	39 FP2	1.8818	1.90418	1.88201	1.74043	1.87166	3.63e-06	5.17e-07	3.54e-06	2.07e-07	3.2e-09	1.37e-06		2.64847	0.377576	2.58217	0.151132	0.00233846	1.16095	0.86136	1.24269	0.0570198	0.332428	2.28129	0.438349	2.07789	2.65052	0.0070345
NIL2	20	20	3	R1	2	E8	39 FP2	1.8818	1.90418	1.88201	1.74043	1.87166	2.82e-06	1.49e-06	7.11e-06	1.24e-07	1.44e-09	2.05e-06		1.37286	0.728408	3.46598	0.0603064	0.000702834	1.16095	0.86136	1.24269	0.0570198	0.332428	1.18252	0.845649	2.7891	1.05764	0.00211425
ULLN	20	20	3	R1	2	D6	39 FP2	1.8818	1.90418	1.88201	1.74043	1.87166	2.48e-06	4.3e-07	2.03e-06	8.21e-08	1.72e-09	1.03e-06		2.40174	0.416364	1.96315	0.0795482	0.00167015	1.16095	0.86136	1.24269	0.0570198	0.332428	2.06877	0.48338	1.57976	1.3951	0.00502409
VAL	20	20	3	R1	2	G5	39 FP2	1.8818	1.90418	1.88201	1.74043	1.87166	2.61e-06	3.92e-07	2.09e-06	1.28e-07	4.69e-09	1.01e-06		2.58086	0.387467	2.06306	0.126757	0.00463934	1.16095	0.86136	1.24269	0.0570198	0.332428	2.22305	0.449832	1.66016	2.22304	0.0139559
ULL	20	20	3	R1	2	C7	39 FP2	1.8818	1.90418	1.88201	1.74043	1.87166	1.72e-06	2.61e-07	1.77e-06	8.34e-08	1.57e-09	6.71e-07		2.5692	0.389226	2.64254	0.12419	0.00234403	1.16095	0.86136	1.24269	0.0570198	0.332428	2.21301	0.451873	2.12647	2.17802	0.00705125
SDG8	20	20	3	R1	2	H7	39 FP2	1.8818	1.90418	1.88201	1.74043	1.87166	2.43e-06	3.96e-07	9.68e-08	3.04e-09	5.78e-10	9.81e-07		2.4798	0.403259	0.0987129	0.00310221	0.000589498	1.16095	0.86136	1.24269	0.0570198	0.332428	2.136	0.468165	0.0794349	0.0544059	0.00177331
VIN3	20	20	3	R2	1	D12	42 FP3	1.88414	1.88905	1.88701	1.71846	1.83123	1.44e-06	3.18e-07	1.63e-06	1.06e-07	1.49e-09	6.76e-07		2.12583	0.470405	2.40395	0.156527	0.00220982	1.15094	0.868852	1.21967	0.084304	0.392446	1.84703	0.54141	1.97098	1.85669	0.00563088
LOV	20	20	3	R1	2	F7	39 FP2	1.8818	1.90418	1.88201	1.74043	1.87166	3.06e-06	3.95e-07	2.47e-06	7.74e-08	1.72e-09	1.1e-06		2.78257	0.35938	2.24732	0.0704299	0.00156939	1.16095	0.86136	1.24269	0.0570198	0.332428	2.39679	0.417224	1.80844	1.23518	0.00472099
LHP	20	20	3	R1	2	D5	39 FP2	1.8818	1.90418	1.88201	1.74043	1.87166	1.27e-06	1.99e-07	5.82e-07	2.87e-08	2.15e-09	5.02e-07		2.52158	0.396577	1.1602	0.0571324	0.00428305	1.16095	0.86136	1.24269	0.0570198	0.332428	2.17199	0.460408	0.933619	1.00198	0.0128841
FLDF	20	20	3	R1	2	G7	39 FP2	1.8818	1.90418	1.88201	1.74043	1.87166	2.01e-06	3.66e-07	1.08e-06	5.01e-08	1.12e-09	8.58e-07		2.3398	0.427388	1.26086	0.0584252	0.00130536	1.16095	0.86136	1.24269	0.0570198	0.332428	2.01541	0.496178	1.01462	1.02465	0.00392675
COL	20	20	3	R1	2	D8	39 FP2	1.8818	1.90418	1.88201	1.74043	1.87166	2.6e-06	1.2e-06	1.89e-07	1.14e-08	2.77e-09	1.76e-06		1.47267	0.679037	0.107362	0.00648729	0.00156886	1.16095	0.86136	1.24269	0.0570198	0.332428	1.2685	0.788331	0.0863948	0.113773	0.0047194
NDX	20	20	3	R1	2	F6	39 FP2	1.8818	1.90418	1.88201	1.74043	1.87166	2.75e-06	5.03e-07	2e-06	3.89e-08	1.75e-08	1.18e-06		2.3378	0.427752	1.70594	0.0331025	0.0148922	1.16095	0.86136	1.24269	0.0570198	0.332428	2.01369	0.4966	1.37278	0.580544	0.0447983
EDI	20	20	3	R1	2	B6	39 FP2	1.8818	1.90418	1.88201	1.74043	1.87166	2.48e-06	3.54e-07	1.89e-06	8.15e-08	1.04e-08	9.36e-07		2.64477	0.378104	2.01745	0.087001	0.0111112	1.16095	0.86136	1.24269	0.0570198	0.332428	2.2781	0.438962	1.62345	1.5258	0.0334245
FVEF	20	20	3	R1	2	G6	41 FP2	1.89515	1.88584	1.8893	1.70197	1.83167	3.34e-06	8.3e-07	3.07e-06	2.62e-07	6.81e-09	1.66e-06		2.00556	0.498615	1.84716	0.157765	0.00409377	1.05934	0.94398	1.30203	0.114947	0.404734	1.89321	0.528205	1.41868	1.3725	0.0101147
FLDF	20	20	3	R1	2	C6	41 FP2	1.89515	1.88584	1.8893	1.70197	1.83167	3.07e-06	8.9e-07	2.37e-06	2.84e-07	2.43e-09	1.65e-06		1.85872	0.538004	1.43557	0.171665	0.00146955	1.05934	0.94398	1.30203	0.114947	0.404734	1.7546	0.569932	1.10256	1.49342	0.00363091
LHP	20	20	3	R1	2	C5	41 FP2	1.89515	1.88584	1.8893	1.70197	1.83167	2.1e-06	8.01e-07	1.45e-06	1.48e-07	8.56e-09	1.3e-06		1.61805	0.618029	1.11726	0.114494	0.00660584	1.05934	0.94398	1.30203	0.114947	0.404734	1.52741	0.654705	0.858092	0.996053	0.0163214
SF2	20	20	3	R2	1	G10	42 FP3	1.88414	1.88905	1.88701	1.71846	1.83123	1.11e-06	4.2e-07	1.77e-06	5.09e-08	4.22e-10	6.82e-07		1.62453	0.615563	2.5923	0.0745794	0.000619008	1.15094	0.868852	1.21967	0.084304	0.392446	1.41148	0.708478	2.1254	0.884648	0.00157731
VRN5	20	20	3	R1	2	H7	41 FP2	1.89515	1.88584	1.8893	1.70197	1.83167	2.06e-06	7.82e-07	1.78e-06	1.91e-07	6.68e-09	1.27e-06		1.62288	0.61619	1.40137	0.150906	0.00526714	1.05934	0.94398	1.30203	0.114947	0.404734	1.53196	0.652758	1.0763	1.31282	0.0130138
VRN2	20	20	3	R1	2	E6	41 FP2	1.89515	1.88584	1.8893	1.70197	1.83167	3.76e-06	8.77e-07	3.4e-06	1.77e-07	6.46e-09	1.82e-06		2.07081	0.482902	1.8738	0.0974096	0.0035589	1.05934	0.94398	1.30203	0.114947	0.404734	1.95481	0.51156	1.43914	0.847427	0.00879318
VIN3	20	20	3	R1	1	D6	44 FP2	1.91056	1.88782	1.90293	1.71602	1.83642	1.55e-06	3.81e-07	1.1e-06	5.42e-08	1.06e-09	7.68e-07		2.01708	0.495767	1.42935	0.0706538	0.00138445	1.01194	0.988201	1.4208	0.0974359	0.442002	1.99328	0.501686	1.00601	0.725131	0.00313222
VARN	20	20	3	R1	2	F7	41 FP2	1.89515	1.88584	1.8893	1.70197	1.83167	1.87e-06	8.23e-07	3.17e-06	2.47e-07	3.66e-09	1.24e-06		1.50923	0.66259	2.55035	0.199226	0.00294607	1.05934	0.94398	1.30203	0.114947	0.404734	1.42468	0.701911	1.95875	1.73319	0.00727902
ULL	20	20	3	R1	2	G7	41 FP2	1.89515	1.88584	1.8893	1.70197	1.83167	1.83e-06	5.9e-07	2.41e-06	2.29e-07	3.01e-09	1.04e-06		1.76234	0.567427	2.32081	0.220218	0.00289742	1.05934	0.94398	1.30203	0.114947	0.404734	1.66361	0.601101	1.78246	1.91581	0.00715882
NIL1	20	20	3	R1	2	B5	41 FP2	1.89515	1.88584	1.8893	1.70197	1.83167	2.07e-06	5.63e-07	3.11e-06	2.37e-07	4.61e-09	1.08e-06		1.91649	0.521787	2.88068	0.219458	0.0042681	1.05934	0.94398	1.30203	0.114947	0.404734	1.80913	0.552752	2.21245	1.90921	0.0105454
NIL2	20	20	3	R1	2	C7	41 FP2	1.89515	1.88584	1.8893	1.70197	1.83167	1.26e-06	4.32e-07	1.89e-06	2.32e-07	2.2e-09	7.38e-07		1.70616	0.586111	2.56786	0.314794	0.00298897	1.05934	0.94398	1.30203	0.114947	0.404734	1.61058	0.620893	1.9722	2.73859	0.00738502
VIN3-1	20	20	3	R1	2	E5	41 FP2	1.89515	1.88584	1.8893	1.70197	1.83167	2e-06	7.75e-07	2.22e-06	1.66e-07	0	1.24e-06		1.60483	0.62312	1.78106	0.133669	0	1.05934	0.94398	1.30203	0.114947	0.404734	1.51493	0.660098	1.36791	1.16287	0
FCAF	20	20	3	R1	2	D6	41 FP2	1.89515	1.88584	1.8893	1.70197	1.83167	2.23e-06	4.97e-07	1.62e-06	1.43e-07	2.35e-09	1.05e-06		2.12093	0.47149	1.53613	0.135875	0.00223317	1.05934	0.94398	1.30203	0.114947	0.404734	2.00212	0.49947	1.1798	1.18206	0.00551761
EDI	20	20	3	R1	2	F6	41 FP2	1.89515	1.88584	1.8893	1.70197	1.83167	1.32e-06	3.17e-07	1.37e-06	8.92e-08	1.03e-08	6.47e-07		2.04244	0.489611	2.11944	0.137793	0.0159135	1.05934	0.94398	1.30203	0.114947	0.404734	1.92802	0.518667	1.6278	1.19875	0.0393184
LOV	20	20	3	R1	2	B8	41 FP2	1.89515	1.88584	1.8893	1.70197	1.83167	1.33e-06	6.72e-07	3.38e-06	3.27e-07	4.12e-09	9.46e-07		1.4077	0.710376	3.56781	0.345794	0.00435887	1.05934	0.94398	1.30203	0.114947	0.404734	1.32885	0.752533	2.7402	3.00828	0.0107697
SDG8	20	20	3	R1	2	C8	41 FP2	1.89515	1.88584	1.8893	1.70197	1.83167	1.19e-06	5.36e-07	1.18e-07	1.01e-08	1.28e-09	7.97e-07		1.48688	0.672548	0.147443	0.0126696	0.00160913	1.05934	0.94398	1.30203	0.114947	0.404734	1.40359	0.71246	0.113241	0.110221	0.00397577
NDX	20	20	3	R1	2	D7	41 FP2	1.89515	1.88584	1.8893	1.70197	1.83167	1.75e-06	6.1e-07	1.98e-06	2e-07	3.15e-08	1.03e-06		1.69251	0.590837	1.91735	0.194062	0.0305011	1.05934	0.94398	1.30203	0.114947	0.404734	1.5977	0.6259	1.47259	1.68827	0.0753608
EDIN	20	20	3	R1	2	E7	41 FP2	1.89515	1.88584	1.8893	1.70197	1.83167	2.15e-06	6.38e-07	1.66e-06	2.28e-07	4.09e-09	1.17e-06		1.83591	0.544689	1.41487	0.194415	0.00349592	1.05934	0.94398	1.30203	0.114947	0.404734	1.73306	0.577014	1.08667	1.69134	0.00863755
BRON	20	20	3	R1	2	D8	41 FP2	1.89515	1.88584	1.8893	1.70197	1.83167	1.29e-06	5.61e-07	1.86e-06	8.89e-08	2.14e-09	8.51e-07		1.51845	0.658566	2.18181	0.104447	0.0025128	1.05934	0.94398	1.30203	0.114947	0.404734	1.43339	0.697648	1.6757	0.90865	0.00620851
VAL	20	20	3	R1	2	B6	41 FP2	1.89515	1.88584	1.8893	1.70197	1.83167	2.88e-06	5.88e-07	2.71e-06	3.21e-07	7.96e-09	1.3e-06		2.21251	0.451975	2.08092	0.246666	0.00611893	1.05934	0.94398	1.30203	0.114947	0.404734	2.08857	0.478797	1.59822	2.1459	0.0151184
BRO	20	20	3	R1	2	G5	41 FP2	1.89515	1.88584	1.8893	1.70197	1.83167	1.99e-06	5.78e-07	2.64e-06	1.74e-07	3.14e-09	1.07e-06		1.85521	0.539023	2.4593	0.162092	0.002925	1.05934	0.94398	1.30203	0.114947	0.404734	1.75128	0.571011	1.88883	1.41014	0.00722697
COL	20	20	3	R1	2	F8	41 FP2	1.89515	1.88584	1.8893	1.70197	1.83167	1.91e-06	6.82e-07	1.4e-07	1.27e-08	2.28e-09	1.14e-06		1.67581	0.596727	0.122519	0.0111533	0.00199381	1.05934	0.94398	1.30203	0.114947	0.404734	1.58193	0.632139	0.0940983	0.0970299	0.00492622
VAR	20	20	3	R1	2	H5	41 FP2	1.89515	1.88584	1.8893	1.70197	1.83167	1.7e-06	4.8e-07	1.97e-06	2.83e-07	1.11e-09	9.02e-07		1.87998	0.531921	2.18635	0.313715	0.00123387	1.05934	0.94398	1.30203	0.114947	0.404734	1.77466	0.563488	1.67919	2.7292	0.00304858
ULLN	20	20	3	R1	2	H6	41 FP2	1.89515	1.88584	1.8893	1.70197	1.83167	2.63e-06	5.49e-07	2.21e-06	2.11e-07	3.19e-09	1.2e-06		2.19083	0.456448	1.83675	0.175216	0.00265159	1.05934	0.94398	1.30203	0.114947	0.404734	2.0681	0.483536	1.41069	1.52432	0.00655143
EDIN	20	20	3	R3	1	F9	41 FP3	1.8933	1.88914	1.91039	1.73986	1.84365	3.26e-06	6.99e-07	1.95e-06	1.36e-07	9.16e-10	1.51e-06		2.16084	0.462783	1.29367	0.0898463	0.000606341	1.07618	0.929214	1.04511	0.0601524	0.230516	2.00788	0.498038	1.23783	1.49365	0.00263037
VAR	20	20	3	R3	1	H12	41 FP3	1.8933	1.88914	1.91039	1.73986	1.84365	2.66e-06	9.25e-07	3.66e-06	2.26e-07	3.83e-10	1.57e-06		1.69617	0.589564	2.33105	0.143786	0.000244281	1.07618	0.929214	1.04511	0.0601524	0.230516	1.5761	0.634476	2.23043	2.39036	0.00105972
BRO	20	20	3	R3	1	D11	41 FP3	1.8933	1.88914	1.91039	1.73986	1.84365	2.11e-06	8.5e-07	4.24e-06	2.24e-07	5.69e-10	1.34e-06		1.5745	0.635124	3.172	0.167153	0.000425111	1.07618	0.929214	1.04511	0.0601524	0.230516	1.46304	0.683507	3.03508	2.77883	0.00184417
COL	20	20	3	R3	1	E10	41 FP3	1.8933	1.88914	1.91039	1.73986	1.84365	1.96e-06	6.16e-07	9.47e-08	8.07e-09	7.41e-10	1.1e-06		1.78571	0.560001	0.0861015	0.00733413	0.000673617	1.07618	0.929214	1.04511	0.0601524	0.230516	1.65931	0.602661	0.082385	0.121926	0.00292222
SF2	20	20	3	R1	1	C6	44 FP2	1.91056	1.88782	1.90293	1.71602	1.83642	1.72e-06	5.94e-07	2.46e-06	7.36e-08	3.22e-09	1.01e-06		1.70052	0.588054	2.4334	0.072817	0.00318783	1.01194	0.988201	1.4208	0.0974359	0.442002	1.68046	0.595075	1.71269	0.747332	0.00721225
NDX	20	20	3	R3	1	D10	41 FP3	1.8933	1.88914	1.91039	1.73986	1.84365	2.06e-06	6.33e-07	3.04e-06	2.53e-07	2.05e-08	1.14e-06		1.8026	0.554755	2.66504	0.221778	0.0179289	1.07618	0.929214	1.04511	0.0601524	0.230516	1.675	0.597015	2.55	3.68693	0.0777774
FCAF	20	20	3	R3	1	C10	41 FP3	1.8933	1.88914	1.91039	1.73986	1.84365	1.95e-06	6.17e-07	2.06e-06	1.7e-07	3.78e-10	1.1e-06		1.7791	0.562083	1.8732	0.155021	0.000344211	1.07618	0.929214	1.04511	0.0601524	0.230516	1.65316	0.604902	1.79235	2.57713	0.00149322
LHP	20	20	3	R3	1	B11	41 FP3	1.8933	1.88914	1.91039	1.73986	1.84365	1.29e-06	9.17e-07	1.85e-06	1.73e-07	1.6e-09	1.09e-06		1.18406	0.844552	1.70645	0.159691	0.00147796	1.07618	0.929214	1.04511	0.0601524	0.230516	1.10024	0.908889	1.63279	2.65477	0.00641155
VIN3-1	20	20	3	R3	1	G12	41 FP3	1.8933	1.88914	1.91039	1.73986	1.84365	3.87e-06	1.26e-06	3.28e-06	1.98e-07	1.14e-09	2.21e-06		1.75008	0.571401	1.48255	0.0896488	0.000515548	1.07618	0.929214	1.04511	0.0601524	0.230516	1.6262	0.614929	1.41856	1.49036	0.0022365
VRN5	20	20	3	R3	1	C9	41 FP3	1.8933	1.88914	1.91039	1.73986	1.84365	3.86e-06	1.01e-06	3.84e-06	2.65e-07	2.58e-09	1.97e-06		1.95817	0.51068	1.94677	0.134602	0.00130993	1.07618	0.929214	1.04511	0.0601524	0.230516	1.81956	0.549583	1.86274	2.23769	0.00568263
LOV	20	20	3	R3	1	C12	41 FP3	1.8933	1.88914	1.91039	1.73986	1.84365	2.49e-06	7.6e-07	3.53e-06	1.74e-07	5.71e-10	1.38e-06		1.81036	0.552375	2.56673	0.126213	0.00041504	1.07618	0.929214	1.04511	0.0601524	0.230516	1.68221	0.594455	2.45593	2.09821	0.00180049
NIL2	20	20	3	R3	1	E12	41 FP3	1.8933	1.88914	1.91039	1.73986	1.84365	2.08e-06	6.55e-07	3.38e-06	2.06e-07	6.99e-10	1.17e-06		1.78072	0.561569	2.90012	0.176723	0.000598967	1.07618	0.929214	1.04511	0.0601524	0.230516	1.65467	0.604349	2.77494	2.93793	0.00259838
FLDF	20	20	3	R3	1	F10	41 FP3	1.8933	1.88914	1.91039	1.73986	1.84365	1.69e-06	7.13e-07	2.2e-06	1.61e-07	4.86e-10	1.1e-06		1.54103	0.648918	2.0049	0.146701	0.000442188	1.07618	0.929214	1.04511	0.0601524	0.230516	1.43194	0.698352	1.91836	2.43882	0.00191826
BRON	20	20	3	R3	1	B12	41 FP3	1.8933	1.88914	1.91039	1.73986	1.84365	2.26e-06	1.16e-06	5.13e-06	3.27e-07	8.28e-10	1.62e-06		1.39963	0.714477	3.17038	0.202224	0.000512098	1.07618	0.929214	1.04511	0.0601524	0.230516	1.30055	0.768905	3.03353	3.36187	0.00222154
SDG8	20	20	3	R3	1	H9	41 FP3	1.8933	1.88914	1.91039	1.73986	1.84365	2.99e-06	5.27e-07	1.3e-07	9.56e-09	5.03e-10	1.26e-06		2.38068	0.420048	0.103637	0.00761093	0.000400534	1.07618	0.929214	1.04511	0.0601524	0.230516	2.21216	0.452046	0.0991632	0.126528	0.00173756
VRN2	20	20	3	R3	1	B9	41 FP3	1.8933	1.88914	1.91039	1.73986	1.84365	5.11e-06	9.06e-07	3.4e-06	1.77e-07	7.68e-10	2.15e-06		2.37399	0.421232	1.58219	0.0821658	0.000356848	1.07618	0.929214	1.04511	0.0601524	0.230516	2.20594	0.453321	1.5139	1.36596	0.00154804
FVEF	20	20	3	R3	1	D9	41 FP3	1.8933	1.88914	1.91039	1.73986	1.84365	2.91e-06	7.31e-07	2.39e-06	1.51e-07	8.61e-10	1.46e-06		1.99424	0.501444	1.63922	0.10357	0.000590815	1.07618	0.929214	1.04511	0.0601524	0.230516	1.85308	0.539643	1.56847	1.7218	0.00256302
VIN3	27	27	4	R2	2	G8	34 FP2	1.887	1.906	1.887	1.758	1.884	1.78e-06	6.17e-07	1.3e-06	1.97e-08	1.7e-09	1.05e-06		1.69672	0.589374	1.24332	0.0188242	0.00162318	1.11716	0.895131	1.21766	0.0518166	0.32288	1.51878	0.658422	1.02107	0.363285	0.0050272
EDI	20	20	3	R3	1	B10	41 FP3	1.8933	1.88914	1.91039	1.73986	1.84365	1.97e-06	5.25e-07	2.28e-06	1.28e-07	2.5e-09	1.02e-06		1.9398	0.515518	2.24344	0.126158	0.00245794	1.07618	0.929214	1.04511	0.0601524	0.230516	1.80249	0.55479	2.1466	2.09731	0.0106628
ULL	20	20	3	R3	1	E11	41 FP3	1.8933	1.88914	1.91039	1.73986	1.84365	1.74e-06	6.73e-07	3.02e-06	1.94e-07	1.04e-09	1.08e-06		1.60598	0.622675	2.79451	0.179497	0.000959983	1.07618	0.929214	1.04511	0.0601524	0.230516	1.49229	0.670109	2.67389	2.98404	0.0041645
VARN	20	20	3	R3	1	G10	41 FP3	1.8933	1.88914	1.91039	1.73986	1.84365	2.38e-06	5.67e-07	2.51e-06	1.26e-07	7.22e-10	1.16e-06		2.05019	0.48776	2.15927	0.108029	0.00062134	1.07618	0.929214	1.04511	0.0601524	0.230516	1.90506	0.524917	2.06606	1.79593	0.00269544
VAL	20	20	3	R3	1	G11	41 FP3	1.8933	1.88914	1.91039	1.73986	1.84365	2.15e-06	7.51e-07	3.22e-06	2.73e-07	2.03e-09	1.27e-06		1.69016	0.59166	2.53658	0.21512	0.00160276	1.07618	0.929214	1.04511	0.0601524	0.230516	1.57052	0.636732	2.42709	3.57626	0.00695293
ULLN	20	20	3	R3	1	H11	41 FP3	1.8933	1.88914	1.91039	1.73986	1.84365	2.43e-06	6.29e-07	2.01e-06	1.62e-07	8.62e-10	1.24e-06		1.96659	0.508493	1.62044	0.130691	0.000696367	1.07618	0.929214	1.04511	0.0601524	0.230516	1.82739	0.54723	1.5505	2.17267	0.00302091
NIL1	20	20	3	R3	1	D12	41 FP3	1.8933	1.88914	1.91039	1.73986	1.84365	1.84e-06	6.33e-07	3.34e-06	2.02e-07	8.4e-10	1.08e-06		1.7028	0.587268	3.09778	0.186939	0.000779427	1.07618	0.929214	1.04511	0.0601524	0.230516	1.58226	0.632006	2.96407	3.10776	0.00338123
FLDF	20	20	3	R2	1	B11	42 FP3	1.88414	1.88905	1.88701	1.71846	1.83123	1.14e-06	4.82e-07	2e-06	4.78e-07	5.06e-10	7.41e-07		1.53665	0.650768	2.69268	0.644957	0.00068223	1.15094	0.868852	1.21967	0.084304	0.392446	1.33512	0.748998	2.2077	7.65037	0.0017384
VARN	20	20	3	R2	1	F9	42 FP3	1.88414	1.88905	1.88701	1.71846	1.83123	1.42e-06	3.15e-07	1.83e-06	5.71e-08	9.19e-10	6.69e-07		2.12454	0.470689	2.74176	0.0853412	0.00137354	1.15094	0.868852	1.21967	0.084304	0.392446	1.84591	0.541737	2.24795	1.0123	0.00349994
LHP	20	20	3	R2	1	E10	42 FP3	1.88414	1.88905	1.88701	1.71846	1.83123	1.44e-06	4.16e-07	1.02e-06	6.18e-08	3.28e-09	7.75e-07		1.86295	0.536782	1.32174	0.0797901	0.00423876	1.15094	0.868852	1.21967	0.084304	0.392446	1.61863	0.617806	1.08368	0.946457	0.0108009
FCAF	20	20	3	R2	1	D9	42 FP3	1.88414	1.88905	1.88701	1.71846	1.83123	1.44e-06	5.38e-07	1.33e-06	5.69e-08	8.48e-10	8.8e-07		1.63605	0.611229	1.51043	0.064658	0.000962932	1.15094	0.868852	1.21967	0.084304	0.392446	1.42148	0.703491	1.23839	0.766962	0.00245367
VIN3	27	27	4	R3	1	H6	34 FP2	1.887	1.906	1.887	1.758	1.884	3.7e-06	5.88e-07	2.1e-06	7.65e-08	2.66e-09	1.48e-06		2.50974	0.398447	1.426	0.0518829	0.00180303	1.11716	0.895131	1.21766	0.0518166	0.32288	2.24655	0.445127	1.1711	1.00128	0.0055842
BRO	20	20	3	R2	1	E11	42 FP3	1.88414	1.88905	1.88701	1.71846	1.83123	1.19e-06	4.34e-07	2.87e-06	9.72e-08	9.7e-10	7.17e-07		1.65356	0.604758	4.00673	0.135497	0.00135153	1.15094	0.868852	1.21967	0.084304	0.392446	1.43669	0.696042	3.28509	1.60725	0.00344387
ULLN	20	20	3	R2	1	H9	42 FP3	1.88414	1.88905	1.88701	1.71846	1.83123	1.56e-06	3.75e-07	1.69e-06	9.47e-08	1.26e-09	7.65e-07		2.04206	0.489702	2.20452	0.123794	0.00164349	1.15094	0.868852	1.21967	0.084304	0.392446	1.77425	0.56362	1.80747	1.46842	0.00418781
EDI	20	20	3	R2	1	E9	42 FP3	1.88414	1.88905	1.88701	1.71846	1.83123	1.24e-06	3.93e-07	1.67e-06	5.27e-08	7.18e-09	6.97e-07		1.77376	0.563774	2.39379	0.0755395	0.010289	1.15094	0.868852	1.21967	0.084304	0.392446	1.54114	0.648872	1.96265	0.896036	0.0262177
BRON	20	20	3	R2	1	D11	42 FP3	1.88414	1.88905	1.88701	1.71846	1.83123	9.74e-07	4.51e-07	2.34e-06	1.8e-07	6.78e-10	6.63e-07		1.47006	0.680246	3.52706	0.271544	0.00102364	1.15094	0.868852	1.21967	0.084304	0.392446	1.27726	0.782925	2.8918	3.22101	0.00260837
LOV	20	20	3	R2	1	G9	42 FP3	1.88414	1.88905	1.88701	1.71846	1.83123	1.17e-06	3.37e-07	1.81e-06	1.04e-07	1.59e-09	6.29e-07		1.86432	0.53639	2.87687	0.164883	0.00252198	1.15094	0.868852	1.21967	0.084304	0.392446	1.61981	0.617355	2.35872	1.95581	0.00642631
SDG8	20	20	3	R2	1	D10	42 FP3	1.88414	1.88905	1.88701	1.71846	1.83123	1.35e-06	3.52e-07	9.63e-08	8.53e-09	5.42e-10	6.91e-07		1.95987	0.510237	0.139467	0.0123583	0.000785307	1.15094	0.868852	1.21967	0.084304	0.392446	1.70284	0.587254	0.114348	0.146592	0.00200106
VAR	20	20	3	R2	1	C11	42 FP3	1.88414	1.88905	1.88701	1.71846	1.83123	1.33e-06	4.49e-07	3.32e-06	5.63e-07	3.76e-10	7.72e-07		1.71787	0.582118	4.29674	0.728627	0.00048656	1.15094	0.868852	1.21967	0.084304	0.392446	1.49257	0.669985	3.52285	8.64285	0.00123982
VRN5	20	20	3	R2	1	B12	42 FP3	1.88414	1.88905	1.88701	1.71846	1.83123	1.58e-06	4.41e-07	2.66e-06	1.68e-07	2.78e-09	8.35e-07		1.89401	0.52798	3.18131	0.201422	0.00333174	1.15094	0.868852	1.21967	0.084304	0.392446	1.64562	0.607676	2.60832	2.38923	0.00848968
VRN2	20	20	3	R2	1	B9	042 FP3	1.88414	1.88905	1.88701	1.71846	1.83123	1.43e-06	5.03e-07	2.13e-06	2.25e-07	1.26e-09	8.48e-07		1.68501	0.593468	2.51599	0.264903	0.00148576	1.15094	0.868852	1.21967	0.084304	0.392446	1.46403	0.683048	2.06284	3.14223	0.0037859
NIL2	20	20	3	R2	1	G11	42 FP3	1.88414	1.88905	1.88701	1.71846	1.83123	1.14e-06	4.01e-07	1.91e-06	1.26e-07	1.37e-09	6.77e-07		1.68824	0.592333	2.81684	0.185417	0.002026	1.15094	0.868852	1.21967	0.084304	0.392446	1.46683	0.681742	2.3095	2.19938	0.0051625
COL	20	20	3	R2	1	H12	42 FP3	1.88414	1.88905	1.88701	1.71846	1.83123	1.17e-06	3.35e-07	6.36e-08	5.57e-09	3.78e-10	6.26e-07		1.86835	0.53523	0.101542	0.00890238	0.000603393	1.15094	0.868852	1.21967	0.084304	0.392446	1.62332	0.61602	0.0832534	0.105598	0.00153752
SF2	27	27	4	R3	1	F6	34 FP2	1.887	1.906	1.887	1.758	1.884	3.09e-06	7.93e-07	2.29e-06	8.39e-08	2.79e-09	1.57e-06		1.97388	0.506617	1.46523	0.0535819	0.00177966	1.11716	0.895131	1.21766	0.0518166	0.32288	1.76688	0.56597	1.20331	1.03407	0.00551185
ULL	20	20	3	R2	1	F11	42 FP3	1.88414	1.88905	1.88701	1.71846	1.83123	1.31e-06	3.42e-07	1.98e-06	1.46e-07	6.25e-10	6.69e-07		1.95815	0.510687	2.96458	0.21813	0.000934035	1.15094	0.868852	1.21967	0.084304	0.392446	1.70134	0.587772	2.43064	2.58742	0.00238003
EDIN	20	20	3	R2	1	C12	42 FP3	1.88414	1.88905	1.88701	1.71846	1.83123	1.65e-06	5.27e-07	2e-06	1.04e-07	1.25e-09	9.31e-07		1.76836	0.565497	2.15144	0.111645	0.00133668	1.15094	0.868852	1.21967	0.084304	0.392446	1.53644	0.650856	1.76395	1.32432	0.00340602
FVEF	20	20	3	R2	1	H10	42 FP3	1.88414	1.88905	1.88701	1.71846	1.83123	1.13e-06	3.12e-07	1.34e-06	6.06e-08	1.87e-09	5.93e-07		1.9011	0.526013	2.26618	0.102162	0.00315501	1.15094	0.868852	1.21967	0.084304	0.392446	1.65177	0.605411	1.85802	1.21183	0.00803934
VAL	20	20	3	R2	1	C9	42 FP3	1.88414	1.88905	1.88701	1.71846	1.83123	1.18e-06	3.24e-07	1.74e-06	2.78e-07	2e-09	6.18e-07		1.90581	0.524711	2.8109	0.449003	0.00324119	1.15094	0.868852	1.21967	0.084304	0.392446	1.65587	0.603913	2.30463	5.32599	0.00825894
NDX	20	20	3	R2	1	H11	42 FP3	1.88414	1.88905	1.88701	1.71846	1.83123	1.51e-06	4.54e-07	2.18e-06	1.12e-07	4.04e-08	8.29e-07		1.82677	0.547414	2.62923	0.134684	0.0487131	1.15094	0.868852	1.21967	0.084304	0.392446	1.58719	0.630043	2.15568	1.5976	0.124127
VIN3-1	20	20	3	R2	1	E12	42 FP3	1.88414	1.88905	1.88701	1.71846	1.83123	1.76e-06	4.31e-07	1.08e-06	6.33e-08	0	8.71e-07		2.02029	0.494977	1.23382	0.0726991	0	1.15094	0.868852	1.21967	0.084304	0.392446	1.75534	0.569691	1.0116	0.862345	0
NIL1	20	20	3	R2	1	G12	42 FP3	1.88414	1.88905	1.88701	1.71846	1.83123	1.52e-06	3.1e-07	2.55e-06	1.28e-07	1.13e-09	6.86e-07		2.21625	0.451213	3.72134	0.187112	0.00164835	1.15094	0.868852	1.21967	0.084304	0.392446	1.92559	0.519321	3.0511	2.21949	0.0042002
FVEF	20	20	3	R1	1	D7	44 FP2	1.91056	1.88782	1.90293	1.71602	1.83642	2.23e-06	5.69e-07	1.98e-06	1.62e-07	4.36e-09	1.13e-06		1.98172	0.504613	1.75612	0.14418	0.00387236	1.01194	0.988201	1.4208	0.0974359	0.442002	1.95833	0.510638	1.23601	1.47974	0.00876095
VRN5	20	20	3	R1	1	E6	44 FP2	1.91056	1.88782	1.90293	1.71602	1.83642	1.59e-06	3.02e-07	1.16e-06	9.42e-08	3.63e-09	6.94e-07		2.29574	0.43559	1.66584	0.135677	0.00522448	1.01194	0.988201	1.4208	0.0974359	0.442002	2.26865	0.440791	1.17247	1.39247	0.01182
NDX	20	20	3	R1	1	E5	44 FP2	1.91056	1.88782	1.90293	1.71602	1.83642	1.12e-06	3.13e-07	1.4e-06	6.92e-08	1.66e-08	5.92e-07		1.89111	0.52879	2.35989	0.116872	0.0280174	1.01194	0.988201	1.4208	0.0974359	0.442002	1.8688	0.535104	1.66096	1.19948	0.0633874
COL	20	20	3	R1	1	B7	44 FP2	1.91056	1.88782	1.90293	1.71602	1.83642	2.51e-06	8.89e-07	1.66e-07	1.09e-08	3.95e-09	1.49e-06		1.67927	0.595495	0.110996	0.00730758	0.00264763	1.01194	0.988201	1.4208	0.0974359	0.442002	1.65946	0.602606	0.0781222	0.0749989	0.00599009
NIL1	20	20	3	R1	1	E7	44 FP2	1.91056	1.88782	1.90293	1.71602	1.83642	2.76e-06	5.65e-07	3.02e-06	2.25e-07	4.82e-09	1.25e-06		2.21092	0.4523	2.41956	0.179875	0.00386353	1.01194	0.988201	1.4208	0.0974359	0.442002	2.18484	0.4577	1.70295	1.84608	0.00874099
FCAF	20	20	3	R1	1	D8	44 FP2	1.91056	1.88782	1.90293	1.71602	1.83642	2.76e-06	5.29e-07	2.35e-06	1.37e-07	4.61e-09	1.21e-06		2.28285	0.438048	1.94728	0.113334	0.00381607	1.01194	0.988201	1.4208	0.0974359	0.442002	2.25592	0.443279	1.37055	1.16317	0.00863361
BRO	20	20	3	R1	1	B8	44 FP2	1.91056	1.88782	1.90293	1.71602	1.83642	1.88e-06	3.82e-07	2.51e-06	1.22e-07	3.85e-09	8.48e-07		2.21892	0.450669	2.96307	0.143987	0.00454204	1.01194	0.988201	1.4208	0.0974359	0.442002	2.19274	0.45605	2.08549	1.47777	0.0102761
SF2	27	27	4	R2	2	H8	34 FP2	1.887	1.906	1.887	1.758	1.884	2.4e-06	6.18e-07	1.23e-06	2.15e-08	1.79e-09	1.22e-06		1.97183	0.507142	1.00573	0.0176102	0.00146966	1.11716	0.895131	1.21766	0.0518166	0.32288	1.76505	0.566556	0.825951	0.339856	0.00455171
SDG8	20	20	3	R1	1	B6	44 FP2	1.91056	1.88782	1.90293	1.71602	1.83642	2.36e-06	6.2e-07	1.67e-07	1.45e-08	2e-09	1.21e-06		1.95338	0.511932	0.138336	0.0119738	0.00165534	1.01194	0.988201	1.4208	0.0974359	0.442002	1.93033	0.518045	0.0973647	0.122889	0.0037451
LHP	20	20	3	R1	1	G7	44 FP2	1.91056	1.88782	1.90293	1.71602	1.83642	2.25e-06	5.51e-07	1.34e-06	1.11e-07	9.8e-09	1.11e-06		2.02216	0.494521	1.20084	0.0995495	0.00879692	1.01194	0.988201	1.4208	0.0974359	0.442002	1.9983	0.500426	0.845181	1.02169	0.0199024
ULLN	20	20	3	R1	1	F5	44 FP2	1.91056	1.88782	1.90293	1.71602	1.83642	8.85e-07	3.22e-07	1.26e-06	5.61e-08	1.62e-09	5.34e-07		1.65828	0.603036	2.35545	0.105154	0.00304033	1.01194	0.988201	1.4208	0.0974359	0.442002	1.63871	0.610236	1.65783	1.07922	0.00687855
VARN	20	20	3	R1	1	E8	44 FP2	1.91056	1.88782	1.90293	1.71602	1.83642	2.44e-06	5.07e-07	2.92e-06	1.79e-07	5.88e-09	1.11e-06		2.19419	0.455749	2.61803	0.161115	0.00528163	1.01194	0.988201	1.4208	0.0974359	0.442002	2.1683	0.461191	1.84264	1.65355	0.0119493
VIN3-1	20	20	3	R1	1	C7	44 FP2	1.91056	1.88782	1.90293	1.71602	1.83642	2.11e-06	7.3e-07	3.39e-06	1.93e-07	0	1.24e-06		1.69877	0.588661	2.73432	0.15565	0	1.01194	0.988201	1.4208	0.0974359	0.442002	1.67873	0.59569	1.92449	1.59746	0
BRON	20	20	3	R1	1	B5	44 FP2	1.91056	1.88782	1.90293	1.71602	1.83642	1.23e-06	4.2e-07	1.96e-06	5.11e-08	1.66e-09	7.2e-07		1.71195	0.584129	2.72579	0.0709612	0.00230058	1.01194	0.988201	1.4208	0.0974359	0.442002	1.69175	0.591104	1.91848	0.728286	0.0052049
ULL	20	20	3	R1	1	G5	44 FP2	1.91056	1.88782	1.90293	1.71602	1.83642	1.78e-06	4.43e-07	2.15e-06	1.01e-07	1.75e-09	8.87e-07		2.00149	0.499628	2.41957	0.113667	0.00197706	1.01194	0.988201	1.4208	0.0974359	0.442002	1.97787	0.505594	1.70296	1.16658	0.00447297
VAR	20	20	3	R1	1	D5	44 FP2	1.91056	1.88782	1.90293	1.71602	1.83642	1.19e-06	3.98e-07	1.91e-06	1.05e-07	9.22e-10	6.87e-07		1.72626	0.579288	2.77952	0.152886	0.0013419	1.01194	0.988201	1.4208	0.0974359	0.442002	1.70589	0.586205	1.9563	1.56909	0.00303596
VRN2	20	20	3	R1	1	G6	44 FP2	1.91056	1.88782	1.90293	1.71602	1.83642	2.03e-06	4.69e-07	2.51e-06	9.25e-08	3.19e-09	9.75e-07		2.07981	0.480813	2.57656	0.0949059	0.00327324	1.01194	0.988201	1.4208	0.0974359	0.442002	2.05527	0.486554	1.81345	0.974034	0.00740549
NIL2	20	20	3	R1	1	H8	44 FP2	1.91056	1.88782	1.90293	1.71602	1.83642	3.39e-06	8.12e-07	4.11e-06	2.02e-07	6.25e-09	1.66e-06		2.04225	0.489655	2.47824	0.121882	0.00376841	1.01194	0.988201	1.4208	0.0974359	0.442002	2.01816	0.495502	1.74425	1.25089	0.00852577
LOV	20	20	3	R1	1	H7	44 FP2	1.91056	1.88782	1.90293	1.71602	1.83642	5.48e-06	9.49e-07	5.31e-06	3.09e-07	7.59e-09	2.28e-06		2.40259	0.416217	2.32595	0.135585	0.00332654	1.01194	0.988201	1.4208	0.0974359	0.442002	2.37424	0.421187	1.63707	1.39153	0.00752608
EDIN	20	20	3	R1	1	H5	44 FP2	1.91056	1.88782	1.90293	1.71602	1.83642	1.72e-06	4.15e-07	1.46e-06	7.71e-08	2.68e-09	8.45e-07		2.03909	0.490415	1.72162	0.0911373	0.00316493	1.01194	0.988201	1.4208	0.0974359	0.442002	2.01503	0.496271	1.21172	0.935357	0.00716045
VAL	20	20	3	R1	1	H6	44 FP2	1.91056	1.88782	1.90293	1.71602	1.83642	1.8e-06	2.86e-07	1.38e-06	1.5e-07	2.73e-09	7.18e-07		2.5127	0.397978	1.92621	0.209041	0.00380626	1.01194	0.988201	1.4208	0.0974359	0.442002	2.48305	0.40273	1.35572	2.14542	0.00861142
VIN3	27	27	4	R2	1	D12	37 FP3	1.89376	1.89035	1.87733	1.7121	1.85846	1.73e-06	3.49e-07	6.64e-07	5.16e-08	2.05e-09	7.77e-07		2.22796	0.44884	0.855043	0.0664703	0.00263992	1.15903	0.862792	1.24862	0.11741	0.37378	1.92227	0.520218	0.684787	0.566137	0.00706277
FLDF	20	20	3	R1	1	C8	44 FP2	1.91056	1.88782	1.90293	1.71602	1.83642	1.9e-06	5.03e-07	1.35e-06	5.38e-08	2.11e-09	9.78e-07		1.94259	0.514776	1.38265	0.0550089	0.00216333	1.01194	0.988201	1.4208	0.0974359	0.442002	1.91967	0.520922	0.973143	0.564565	0.00489439
EDI	20	20	3	R1	1	C5	44 FP2	1.91056	1.88782	1.90293	1.71602	1.83642	1.04e-06	3.55e-07	2.02e-06	4.57e-08	8.09e-09	6.08e-07		1.70992	0.584823	3.32517	0.0751435	0.0133161	1.01194	0.988201	1.4208	0.0974359	0.442002	1.68974	0.591805	2.34034	0.771209	0.0301267
BRON	34	34	5	R1	2	D8	35 FP2	1.9	1.889	1.891	1.718	1.839	1.3e-06	5.19e-07	1.26e-06	5.63e-08	7.92e-09	8.21e-07		1.58172	0.632223	1.5282	0.0684947	0.00964421	1.00832	0.99175	1.03881	0.10545	0.543541	1.56867	0.637483	1.4711	0.649549	0.0177433
VAL	34	34	5	R1	2	F6	35 FP2	1.9	1.889	1.891	1.718	1.839	9.14e-07	6.66e-07	2.72e-06	2.09e-07	1.21e-08	7.8e-07		1.17173	0.853436	3.48099	0.267979	0.0155203	1.00832	0.99175	1.03881	0.10545	0.543541	1.16207	0.860536	3.35093	2.5413	0.028554
VRN2	34	34	5	R1	2	F8	35 FP2	1.9	1.889	1.891	1.718	1.839	2.08e-06	6.55e-07	1.03e-06	4.7e-08	1.24e-08	1.17e-06		1.78185	0.561216	0.8846	0.0402936	0.010645	1.00832	0.99175	1.03881	0.10545	0.543541	1.76714	0.565885	0.851549	0.382112	0.0195845
BRO	34	34	5	R1	2	B7	35 FP2	1.9	1.889	1.891	1.718	1.839	9.99e-07	4.7e-07	1.9e-06	6.31e-08	3.25e-09	6.85e-07		1.45737	0.686169	2.77577	0.0920323	0.00474646	1.00832	0.99175	1.03881	0.10545	0.543541	1.44534	0.691877	2.67206	0.872762	0.00873249
SDG8	34	34	5	R1	2	D5	35 FP2	1.9	1.889	1.891	1.718	1.839	9.37e-07	5.74e-07	4.76e-08	0	1.78e-09	7.34e-07		1.27755	0.782746	0.0648813	0	0.00242747	1.00832	0.99175	1.03881	0.10545	0.543541	1.26701	0.789257	0.0624572	0	0.00446603
VARN	34	34	5	R1	2	H8	35 FP2	1.9	1.889	1.891	1.718	1.839	1.43e-06	5.62e-07	2e-06	7.31e-08	5.44e-09	8.96e-07		1.59362	0.627502	2.23471	0.0816143	0.00607391	1.00832	0.99175	1.03881	0.10545	0.543541	1.58047	0.632722	2.15122	0.773965	0.0111747
VAR	34	34	5	R1	2	G5	35 FP2	1.9	1.889	1.891	1.718	1.839	5.28e-07	7.1e-07	3.39e-06	1.38e-07	2.3e-09	6.12e-07		0.862109	1.15995	5.54615	0.225063	0.0037659	1.00832	0.99175	1.03881	0.10545	0.543541	0.854996	1.1696	5.33894	2.13432	0.00692847
NIL2	34	34	5	R1	2	G6	35 FP2	1.9	1.889	1.891	1.718	1.839	8.45e-07	5.47e-07	1.54e-06	5.15e-07	5.57e-09	6.8e-07		1.24266	0.804727	2.26578	0.757194	0.00819495	1.00832	0.99175	1.03881	0.10545	0.543541	1.2324	0.811422	2.18113	7.18063	0.015077
FCAF	34	34	5	R1	2	C5	35 FP2	1.9	1.889	1.891	1.718	1.839	1.03e-06	6.25e-07	1.39e-06	4.75e-08	6.19e-09	8.01e-07		1.28092	0.780686	1.74074	0.0593329	0.00773215	1.00832	0.99175	1.03881	0.10545	0.543541	1.27036	0.787181	1.6757	0.562666	0.0142255
VIN3	27	27	4	3	2	H9	37 FP3	1.89376	1.89035	1.87733	1.7121	1.85846	3e-06	4.4e-07	1.14e-06	8.66e-08	6.97e-09	1.15e-06		2.61043	0.383079	0.98936	0.0754129	0.00606477	1.15903	0.862792	1.24862	0.11741	0.37378	2.25226	0.443999	0.79236	0.642303	0.0162255
NDX	34	34	5	R1	2	D7	35 FP2	1.9	1.889	1.891	1.718	1.839	8.82e-07	8.13e-07	1.37e-06	7.81e-08	4.38e-08	8.47e-07		1.04165	0.960011	1.61676	0.0921938	0.0516853	1.00832	0.99175	1.03881	0.10545	0.543541	1.03306	0.967997	1.55635	0.874292	0.0950901
EDIN	34	34	5	R1	2	C8	35 FP2	1.9	1.889	1.891	1.718	1.839	1.75e-06	5.95e-07	9.48e-07	4.93e-08	7.04e-09	1.02e-06		1.71386	0.58348	0.930105	0.0483633	0.0069128	1.00832	0.99175	1.03881	0.10545	0.543541	1.69972	0.588334	0.895354	0.458639	0.0127181
VRN5	34	34	5	R1	2	G8	35 FP2	1.9	1.889	1.891	1.718	1.839	2.06e-06	6.46e-07	9.82e-07	3.61e-08	1.71e-08	1.15e-06		1.78658	0.55973	0.851698	0.031314	0.0148434	1.00832	0.99175	1.03881	0.10545	0.543541	1.77184	0.564386	0.819877	0.296957	0.0273087
ULL	34	34	5	R1	2	C6	35 FP2	1.9	1.889	1.891	1.718	1.839	9.87e-07	2.32e-07	1.26e-06	9.9e-08	3.44e-09	4.79e-07		2.06184	0.485003	2.63836	0.206914	0.00719529	1.00832	0.99175	1.03881	0.10545	0.543541	2.04483	0.489038	2.53978	1.96221	0.0132378
SF2	27	27	4	R2	1	E12	37 FP3	1.89376	1.89035	1.87733	1.7121	1.85846	1.61e-06	3.03e-07	5.92e-07	2.47e-08	3.11e-09	6.98e-07		2.30512	0.433818	0.847619	0.0354044	0.00445059	1.15903	0.862792	1.24862	0.11741	0.37378	1.98884	0.502807	0.678842	0.301544	0.011907
LOV	34	34	5	R1	2	B5	35 FP2	1.9	1.889	1.891	1.718	1.839	1.07e-06	5.75e-07	1.86e-06	8.59e-08	1.01e-08	7.83e-07		1.36284	0.73376	2.36942	0.109662	0.0128331	1.00832	0.99175	1.03881	0.10545	0.543541	1.3516	0.739864	2.2809	1.03995	0.0236102
NIL1	34	34	5	R1	2	E8	35 FP2	1.9	1.889	1.891	1.718	1.839	1.7e-06	4.56e-07	1.43e-06	8.78e-08	9.29e-09	8.81e-07		1.93324	0.517265	1.61723	0.0995637	0.010543	1.00832	0.99175	1.03881	0.10545	0.543541	1.91729	0.521568	1.55681	0.944183	0.0193969
EDI	34	34	5	R1	2	H6	35 FP2	1.9	1.889	1.891	1.718	1.839	1.04e-06	3.2e-07	9.96e-07	4.66e-07	1.11e-08	5.76e-07		1.8028	0.554694	1.7288	0.808976	0.0191718	1.00832	0.99175	1.03881	0.10545	0.543541	1.78792	0.559308	1.66421	7.67169	0.035272
COL	34	34	5	R1	2	B6	35 FP2	1.9	1.889	1.891	1.718	1.839	1.17e-06	2.35e-07	1.96e-08	0	4.42e-09	5.25e-07		2.23441	0.447546	0.03739	0	0.0084304	1.00832	0.99175	1.03881	0.10545	0.543541	2.21597	0.451269	0.0359931	0	0.0155101
ULLN	34	34	5	R1	2	H7	35 FP2	1.9	1.889	1.891	1.718	1.839	1.43e-06	6.39e-07	1.37e-06	2.83e-08	6.73e-09	9.55e-07		1.49495	0.668917	1.43061	0.0296633	0.00704458	1.00832	0.99175	1.03881	0.10545	0.543541	1.48262	0.674482	1.37716	0.281303	0.0129605
FLDF	34	34	5	R1	2	F7	35 FP2	1.9	1.889	1.891	1.718	1.839	6.27e-07	8.23e-07	1.2e-06	2.94e-08	5.72e-09	7.19e-07		0.8732	1.14521	1.66976	0.040884	0.00795444	1.00832	0.99175	1.03881	0.10545	0.543541	0.865996	1.15474	1.60738	0.387711	0.0146345
VIN3-1	34	34	5	R1	2	C7	35 FP2	1.9	1.889	1.891	1.718	1.839	1.31e-06	6.47e-07	1.12e-06	5.53e-08	0	9.21e-07		1.42402	0.702238	1.21375	0.0600167	0	1.00832	0.99175	1.03881	0.10545	0.543541	1.41227	0.708079	1.1684	0.56915	0
FVEF	34	34	5	R1	2	E5	35 FP2	1.9	1.889	1.891	1.718	1.839	1.01e-06	9.04e-07	2.04e-06	5.65e-08	7.18e-09	9.56e-07		1.05729	0.945818	2.13607	0.0591105	0.00751258	1.00832	0.99175	1.03881	0.10545	0.543541	1.04856	0.953687	2.05626	0.560557	0.0138216
LHP	34	34	5	R1	2	G7	35 FP2	1.9	1.889	1.891	1.718	1.839	7.94e-07	8.71e-07	1.06e-06	5.39e-08	1.18e-08	8.31e-07		0.954927	1.0472	1.27082	0.0648928	0.0141899	1.00832	0.99175	1.03881	0.10545	0.543541	0.947049	1.05591	1.22334	0.615391	0.0261064
SF2	27	27	4	3	2	F9	37 FP3	1.89376	1.89035	1.87733	1.7121	1.85846	1.56e-06	2.55e-07	6.88e-07	4.03e-08	1.25e-09	6.3e-07		2.47128	0.404649	1.09226	0.0640176	0.00197927	1.15903	0.862792	1.24862	0.11741	0.37378	2.1322	0.468999	0.874768	0.545248	0.00529529
VIN3	27	27	4	R1	1	F11	38 FP3	1.88424	1.88371	1.87288	1.74371	1.8741	1.31e-06	6.6e-07	1.32e-06	4.24e-08	1.12e-09	9.29e-07		1.40835	0.710051	1.42073	0.0456448	0.001203	1.04674	0.955347	1.28768	0.0438876	0.312099	1.34546	0.743239	1.10332	1.04004	0.00385456
SF2	27	27	4	R1	1	G11	38 FP3	1.88424	1.88371	1.87288	1.74371	1.8741	1.05e-06	5.98e-07	7.09e-07	2.38e-08	1.33e-09	7.92e-07		1.32588	0.754217	0.894657	0.0300313	0.0016793	1.04674	0.955347	1.28768	0.0438876	0.312099	1.26667	0.789469	0.69478	0.684276	0.00538067
VIN3	27	27	4	R1	2	G3	41 FP1	1.89023	1.88812	1.9013	1.73901	1.84621	3.27e-06	1.42e-06	3.01e-06	9.51e-08	1.73e-09	2.15e-06		1.5188	0.658416	1.39947	0.0441651	0.000801162	1.0889	0.918361	1.1708	0.0588638	0.323463	1.3948	0.716947	1.19531	0.750292	0.00247683
SF2	27	27	4	R1	2	H3	41 FP1	1.89023	1.88812	1.9013	1.73901	1.84621	2.67e-06	1.09e-06	2.32e-06	1.21e-07	5.71e-09	1.7e-06		1.56507	0.638948	1.36154	0.0708489	0.00334892	1.0889	0.918361	1.1708	0.0588638	0.323463	1.4373	0.695748	1.16291	1.20361	0.0103533
VIN3	34	34	5	R1	2	B8	35 FP2	1.9	1.889	1.891	1.718	1.839	1.6e-06	5.22e-07	5.99e-07	3.45e-08	1.07e-09	9.14e-07		1.75129	0.571007	0.654867	0.0377092	0.0011699	1.00832	0.99175	1.03881	0.10545	0.543541	1.73684	0.575758	0.6304	0.357604	0.00215236
SF2	34	34	5	R1	2	E6	35 FP2	1.9	1.889	1.891	1.718	1.839	1.36e-06	7.38e-07	1.04e-06	5.69e-08	6.84e-09	1e-06		1.35505	0.737978	1.0378	0.0568805	0.00684175	1.00832	0.99175	1.03881	0.10545	0.543541	1.34387	0.744117	0.999021	0.539409	0.0125874
VIN3	34	34	5	R3	1	B11	39 FP3	1.89307	1.87229	1.88267	1.7122	1.85025	5.48e-07	6.13e-07	1.38e-06	3.29e-08	2.86e-10	5.8e-07		0.945115	1.05807	2.38734	0.0567343	0.000493505	0.885841	1.12887	1.02006	0.102728	0.380048	1.06691	0.937284	2.34038	0.552275	0.00129853
VIN3	34	34	5	R3	2	B12	40 FP3	1.88186	1.88227	1.89024	1.73203	1.83262	7.46e-07	3.78e-07	8.77e-07	1.27e-08	7.43e-10	5.31e-07		1.40513	0.711679	1.65199	0.0239322	0.00140051	1.16703	0.856874	1.131	0.060369	0.351644	1.20402	0.830553	1.46065	0.396431	0.00398275
SF2	34	34	5	R3	2	E10	40 FP3	1.88186	1.88227	1.89024	1.73203	1.83262	1.23e-06	4.72e-07	1.19e-06	1.47e-08	4.17e-09	7.62e-07		1.61373	0.619683	1.56278	0.0192362	0.00546496	1.16703	0.856874	1.131	0.060369	0.351644	1.38276	0.723191	1.38177	0.318643	0.0155412
VIN3	34	34	5	R2	1	F5	42 FP2	1.89407	1.90465	1.89517	1.73849	1.85328	1.94e-06	7.03e-07	1.18e-06	9.24e-09	1.02e-09	1.17e-06		1.66023	0.602327	1.01383	0.00791866	0.000874665	1.19087	0.839725	1.43321	0.0690586	0.326914	1.39413	0.717291	0.707381	0.114666	0.00267552
VIN3	34	34	5	R1	1	G8	43 FP2	1.90255	1.89726	1.89322	1.75825	1.86603	3.28e-06	1.09e-06	3.66e-06	3.79e-08	2.11e-09	1.89e-06		1.72988	0.578075	1.93038	0.0200194	0.00111447	1.29849	0.770125	1.59722	0.0486313	0.328576	1.33222	0.750625	1.20858	0.411656	0.00339184
SF2	34	34	5	R2	1	G6	42 FP2	1.89407	1.90465	1.89517	1.73849	1.85328	2.24e-06	4.26e-07	1.17e-06	2.65e-08	2.71e-09	9.78e-07		2.29328	0.436056	1.20013	0.0270645	0.00277479	1.19087	0.839725	1.43321	0.0690586	0.326914	1.92573	0.519284	0.837367	0.391907	0.00848784
VIN3	34	34	5	R2	2	G11	44 FP3	1.90031	1.88556	1.89571	1.76328	1.87429	2.1e-06	5.82e-07	1.66e-06	2.59e-08	8.09e-10	1.11e-06		1.89957	0.526434	1.50303	0.0234815	0.000731747	1.10849	0.902128	1.40595	0.0402707	0.235881	1.71366	0.583546	1.06905	0.583091	0.00310218
SF2	34	34	5	R1	1	H7	43 FP2	1.90255	1.89726	1.89322	1.75825	1.86603	2.58e-06	1.17e-06	3.08e-06	2.34e-08	1.81e-08	1.74e-06		1.48472	0.673527	1.77201	0.0134501	0.0104333	1.29849	0.770125	1.59722	0.0486313	0.328576	1.14342	0.874568	1.10943	0.276574	0.031753
VIN3	41	41	6	R3	1	C5	34 FP2	1.887	1.906	1.887	1.758	1.884	2.7e-06	6.34e-07	2.25e-06	1.43e-07	2.65e-09	1.31e-06		2.06361	0.484588	1.72151	0.109043	0.00202873	1.11716	0.895131	1.21766	0.0518166	0.32288	1.8472	0.54136	1.41378	2.1044	0.00628324
SF2	34	34	5	R2	2	G9	44 FP3	1.90031	1.88556	1.89571	1.76328	1.87429	3.65e-06	9.47e-07	2e-06	1.31e-08	4.11e-09	1.86e-06		1.96243	0.509571	1.07629	0.00704043	0.00221148	1.10849	0.902128	1.40595	0.0402707	0.235881	1.77037	0.564854	0.76552	0.174827	0.00937539
LHP	34	34	5	R3	1	D11	39 FP3	1.89307	1.87229	1.88267	1.7122	1.85025	5.6e-07	5.85e-07	6.69e-07	2.36e-08	7.44e-09	5.72e-07		0.978472	1.022	1.16907	0.0412094	0.0130059	0.885841	1.12887	1.02006	0.102728	0.380048	1.10457	0.90533	1.14607	0.401149	0.0342218
NDX	34	34	5	R3	1	C10	39 FP3	1.89307	1.87229	1.88267	1.7122	1.85025	7.68e-07	5.3e-07	1.18e-06	4.49e-08	4.12e-08	6.38e-07		1.20369	0.830779	1.85559	0.070454	0.064524	0.885841	1.12887	1.02006	0.102728	0.380048	1.35881	0.735938	1.81909	0.685827	0.169779
ULLN	34	34	5	R3	1	G11	39 FP3	1.89307	1.87229	1.88267	1.7122	1.85025	7.59e-07	5.19e-07	1.67e-06	5.73e-08	3.33e-09	6.27e-07		1.20942	0.826843	2.66469	0.0913256	0.00531239	0.885841	1.12887	1.02006	0.102728	0.380048	1.36528	0.732452	2.61227	0.889	0.0139782
VARN	34	34	5	R3	1	H10	39 FP3	1.89307	1.87229	1.88267	1.7122	1.85025	8.69e-07	4.69e-07	2.16e-06	4.3e-08	2.51e-09	6.38e-07		1.36169	0.734379	3.38814	0.0673592	0.00394027	0.885841	1.12887	1.02006	0.102728	0.380048	1.53718	0.650543	3.3215	0.655702	0.0103678
EDI	34	34	5	R3	1	G12	39 FP3	1.89307	1.87229	1.88267	1.7122	1.85025	7.75e-07	8.61e-07	1.68e-06	3.68e-08	7.94e-09	8.16e-07		0.948835	1.05392	2.05513	0.0450475	0.00972605	0.885841	1.12887	1.02006	0.102728	0.380048	1.07111	0.933609	2.0147	0.43851	0.0255916
SF2	41	41	6	R3	1	D5	34 FP2	1.887	1.906	1.887	1.758	1.884	2.92e-06	6.26e-07	1.57e-06	4.4e-08	6.23e-09	1.35e-06		2.16052	0.462851	1.16096	0.0325263	0.00460612	1.11716	0.895131	1.21766	0.0518166	0.32288	1.93395	0.517077	0.953437	0.627719	0.0142657
FVEF	34	34	5	R3	1	D9	39 FP3	1.89307	1.87229	1.88267	1.7122	1.85025	4.76e-07	2.92e-07	6.95e-07	1.45e-08	3.02e-09	3.73e-07		1.27641	0.783444	1.8641	0.0387955	0.00810593	0.885841	1.12887	1.02006	0.102728	0.380048	1.44091	0.694007	1.82743	0.377651	0.0213287
FLDF	34	34	5	R3	1	F9	39 FP3	1.89307	1.87229	1.88267	1.7122	1.85025	4.96e-07	3.61e-07	5.35e-07	1.32e-08	1.45e-09	4.23e-07		1.17213	0.853149	1.26559	0.0311078	0.00343191	0.885841	1.12887	1.02006	0.102728	0.380048	1.32318	0.755755	1.2407	0.302816	0.00903021
BRO	34	34	5	R3	1	F11	39 FP3	1.89307	1.87229	1.88267	1.7122	1.85025	8.43e-07	5.92e-07	2.32e-06	5.57e-08	2.95e-09	7.06e-07		1.19348	0.837883	3.28823	0.078825	0.00418032	0.885841	1.12887	1.02006	0.102728	0.380048	1.34729	0.742231	3.22355	0.767315	0.0109994
NIL2	34	34	5	R3	1	F12	39 FP3	1.89307	1.87229	1.88267	1.7122	1.85025	6.36e-07	5.37e-07	1.55e-06	3.85e-08	2.11e-09	5.84e-07		1.08859	0.918623	2.65995	0.0658577	0.00360775	0.885841	1.12887	1.02006	0.102728	0.380048	1.22887	0.813753	2.60763	0.641085	0.00949289
BRON	34	34	5	R3	1	H11	39 FP3	1.89307	1.87229	1.88267	1.7122	1.85025	7.76e-07	5.21e-07	1.76e-06	3.36e-08	1.1e-09	6.36e-07		1.22056	0.819299	2.76141	0.0528521	0.00173322	0.885841	1.12887	1.02006	0.102728	0.380048	1.37785	0.725769	2.70709	0.514484	0.00456053
VIN3	41	41	6	R1	2	D10	37 FP3	1.89376	1.89035	1.87733	1.7121	1.85846	1.51e-06	4.96e-07	1.01e-06	1.42e-07	3.1e-09	8.65e-07		1.74471	0.573161	1.17	0.163948	0.00358691	1.15903	0.862792	1.24862	0.11741	0.37378	1.50532	0.664309	0.937032	1.39637	0.00959632
ULL	34	34	5	R3	1	E12	39 FP3	1.89307	1.87229	1.88267	1.7122	1.85025	8.55e-07	5.04e-07	2.08e-06	3.68e-08	2.2e-09	6.56e-07		1.30305	0.767429	3.17167	0.0559931	0.00334616	0.885841	1.12887	1.02006	0.102728	0.380048	1.47098	0.67982	3.10928	0.54506	0.00880458
VIN3-1	34	34	5	R3	1	B9	39 FP3	1.89307	1.87229	1.88267	1.7122	1.85025	8.93e-07	4.67e-07	1.21e-06	7.17e-08	0	6.46e-07		1.38182	0.723685	1.88032	0.110999	0	0.885841	1.12887	1.02006	0.102728	0.380048	1.55989	0.64107	1.84333	1.08051	0
NIL1	34	34	5	R3	1	G10	39 FP3	1.89307	1.87229	1.88267	1.7122	1.85025	8.28e-07	6.39e-07	2.59e-06	6.23e-08	3.6e-09	7.27e-07		1.13818	0.878599	3.56593	0.085672	0.00494415	0.885841	1.12887	1.02006	0.102728	0.380048	1.28485	0.778299	3.49579	0.833966	0.0130093
VRN5	34	34	5	R3	1	D10	39 FP3	1.89307	1.87229	1.88267	1.7122	1.85025	5.46e-07	4.36e-07	7.62e-07	3.8e-08	3.76e-09	4.88e-07		1.11923	0.893474	1.56187	0.0779525	0.00771501	0.885841	1.12887	1.02006	0.102728	0.380048	1.26346	0.791476	1.53115	0.758821	0.0203001
VAR	34	34	5	R3	1	C9	39 FP3	1.89307	1.87229	1.88267	1.7122	1.85025	3.33e-07	2.05e-07	9.63e-07	2.73e-08	8.1e-10	2.61e-07		1.27396	0.784953	3.68494	0.104611	0.00309855	0.885841	1.12887	1.02006	0.102728	0.380048	1.43814	0.695343	3.61245	1.01832	0.00815305
VRN2	34	34	5	R3	1	H9	39 FP3	1.89307	1.87229	1.88267	1.7122	1.85025	1.1e-06	5.32e-07	1.95e-06	4.25e-08	4.64e-09	7.66e-07		1.44002	0.694437	2.55125	0.0555039	0.00605853	0.885841	1.12887	1.02006	0.102728	0.380048	1.62559	0.615161	2.50106	0.540297	0.0159415
SDG8	34	34	5	R3	1	G9	39 FP3	1.89307	1.87229	1.88267	1.7122	1.85025	6.03e-07	2.76e-07	2.93e-08	4.12e-09	1.33e-09	4.08e-07		1.47874	0.676252	0.0718964	0.0101083	0.00326756	0.885841	1.12887	1.02006	0.102728	0.380048	1.66931	0.599051	0.0704822	0.0983986	0.00859775
COL	34	34	5	R3	1	B10	39 FP3	1.89307	1.87229	1.88267	1.7122	1.85025	8.06e-07	3.11e-07	3.5e-08	3.58e-09	2.24e-09	5e-07		1.61109	0.620698	0.0700377	0.00715165	0.00447176	0.885841	1.12887	1.02006	0.102728	0.380048	1.81871	0.54984	0.0686601	0.069617	0.0117663
EDIN	34	34	5	R3	1	F10	39 FP3	1.89307	1.87229	1.88267	1.7122	1.85025	9.88e-07	4.21e-07	8.95e-07	2.1e-08	2.4e-09	6.45e-07		1.53227	0.652626	1.38912	0.0325196	0.00372976	0.885841	1.12887	1.02006	0.102728	0.380048	1.72974	0.578123	1.3618	0.316559	0.00981391
FCAF	34	34	5	R3	1	E10	39 FP3	1.89307	1.87229	1.88267	1.7122	1.85025	6.51e-07	5.35e-07	1.01e-06	2.85e-08	2.39e-09	5.9e-07		1.10256	0.906983	1.71207	0.0482734	0.00404157	0.885841	1.12887	1.02006	0.102728	0.380048	1.24464	0.803443	1.67839	0.469913	0.0106344
NIL1	34	34	5	R3	2	G10	40 FP3	1.88186	1.88227	1.89024	1.73203	1.83262	1.42e-06	4.98e-07	2.33e-06	3.57e-08	5.56e-09	8.4e-07		1.68703	0.592757	2.77646	0.042556	0.00662161	1.16703	0.856874	1.131	0.060369	0.351644	1.44557	0.691766	2.45488	0.704932	0.0188305
LHP	34	34	5	R3	2	F12	40 FP3	1.88186	1.88227	1.89024	1.73203	1.83262	1.03e-06	7.52e-07	1.53e-06	1.81e-08	1.33e-08	8.81e-07		1.17153	0.853585	1.73789	0.0205536	0.0150541	1.16703	0.856874	1.131	0.060369	0.351644	1.00385	0.996162	1.5366	0.340466	0.0428107
SDG8	34	34	5	R3	2	E11	40 FP3	1.88186	1.88227	1.89024	1.73203	1.83262	1.45e-06	4.74e-07	4.51e-08	7.53e-10	1.53e-09	8.3e-07		1.75043	0.571288	0.0543144	0.000907076	0.0018385	1.16703	0.856874	1.131	0.060369	0.351644	1.4999	0.666712	0.0480234	0.0150255	0.0052283
COL	34	34	5	R3	2	D11	40 FP3	1.88186	1.88227	1.89024	1.73203	1.83262	1.21e-06	5.05e-07	4.29e-08	5.92e-10	2.3e-09	7.81e-07		1.54668	0.646546	0.054875	0.000757845	0.00294138	1.16703	0.856874	1.131	0.060369	0.351644	1.32531	0.754541	0.0485191	0.0125535	0.00836466
BRO	34	34	5	R3	2	D9	40 FP3	1.88186	1.88227	1.89024	1.73203	1.83262	1.52e-06	3.66e-07	1.85e-06	2.84e-08	4.77e-09	7.44e-07		2.0359	0.491183	2.48001	0.0381771	0.006409	1.16703	0.856874	1.131	0.060369	0.351644	1.74451	0.573227	2.19277	0.632396	0.0182258
EDI	34	34	5	R3	2	C11	40 FP3	1.88186	1.88227	1.89024	1.73203	1.83262	9.58e-07	3.26e-07	9.41e-07	2.03e-08	9.73e-09	5.59e-07		1.71299	0.583774	1.68305	0.036252	0.0174008	1.16703	0.856874	1.131	0.060369	0.351644	1.46782	0.681283	1.48811	0.600507	0.0494841
BRON	34	34	5	R3	2	H10	40 FP3	1.88186	1.88227	1.89024	1.73203	1.83262	1.65e-06	6.18e-07	2.35e-06	3.58e-08	3.14e-09	1.01e-06		1.63277	0.612457	2.32691	0.0354501	0.00310766	1.16703	0.856874	1.131	0.060369	0.351644	1.39908	0.714757	2.05739	0.587224	0.00883752
LOV	34	34	5	R3	2	C10	40 FP3	1.88186	1.88227	1.89024	1.73203	1.83262	1.72e-06	4.32e-07	2.03e-06	3.91e-08	1.32e-08	8.61e-07		1.9939	0.50153	2.35611	0.0453864	0.0153339	1.16703	0.856874	1.131	0.060369	0.351644	1.70852	0.585301	2.08322	0.751816	0.0436064
NDX	34	34	5	R3	2	H12	40 FP3	1.88186	1.88227	1.89024	1.73203	1.83262	1.72e-06	1.14e-06	4.44e-06	7.26e-08	9.29e-08	1.4e-06		1.22846	0.814025	3.1723	0.0519312	0.0664355	1.16703	0.856874	1.131	0.060369	0.351644	1.05264	0.949994	2.80486	0.86023	0.188928
FCAF	34	34	5	R3	2	G12	40 FP3	1.88186	1.88227	1.89024	1.73203	1.83262	1.16e-06	7.42e-07	2.06e-06	2.06e-08	3.27e-09	9.26e-07		1.24789	0.801354	2.22245	0.0222342	0.00353003	1.16703	0.856874	1.131	0.060369	0.351644	1.06928	0.935207	1.96503	0.368305	0.0100387
EDIN	34	34	5	R3	2	G9	40 FP3	1.88186	1.88227	1.89024	1.73203	1.83262	1.3e-06	4.37e-07	1.02e-06	1.21e-08	3.31e-09	7.54e-07		1.72285	0.580432	1.34885	0.0160892	0.00439131	1.16703	0.856874	1.131	0.060369	0.351644	1.47627	0.677383	1.19262	0.266515	0.012488
VAR	34	34	5	R3	2	F11	40 FP3	1.88186	1.88227	1.89024	1.73203	1.83262	1.63e-06	7.11e-07	2.69e-06	5.24e-08	2.62e-09	1.07e-06		1.51238	0.661209	2.50415	0.0487417	0.00244133	1.16703	0.856874	1.131	0.060369	0.351644	1.29592	0.771653	2.2141	0.807396	0.00694263
VRN5	34	34	5	R3	2	E9	40 FP3	1.88186	1.88227	1.89024	1.73203	1.83262	1.16e-06	4.15e-07	1.54e-06	2.87e-08	5.99e-09	6.94e-07		1.67239	0.597948	2.21911	0.0413961	0.0086267	1.16703	0.856874	1.131	0.060369	0.351644	1.43302	0.697825	1.96208	0.685719	0.0245325
ULL	34	34	5	R3	2	B11	40 FP3	1.88186	1.88227	1.89024	1.73203	1.83262	8.48e-07	2.6e-07	1.38e-06	2.66e-08	4.99e-09	4.7e-07		1.80476	0.554089	2.93536	0.0565301	0.0106212	1.16703	0.856874	1.131	0.060369	0.351644	1.54646	0.64664	2.59537	0.93641	0.0302044
VIN3-1	34	34	5	R3	2	B9	040 FP3	1.88186	1.88227	1.89024	1.73203	1.83262	1.42e-06	4.4e-07	1.42e-06	2.05e-08	5.07e-10	7.91e-07		1.79693	0.556504	1.79865	0.0259678	0.00064007	1.16703	0.856874	1.131	0.060369	0.351644	1.53975	0.649458	1.59032	0.430151	0.00182022
VARN	34	34	5	R3	2	H9	40 FP3	1.88186	1.88227	1.89024	1.73203	1.83262	1.98e-06	6.35e-07	2.55e-06	4e-08	5.53e-09	1.12e-06		1.76484	0.566622	2.27624	0.0356804	0.00493685	1.16703	0.856874	1.131	0.060369	0.351644	1.51225	0.661267	2.0126	0.591038	0.0140394
SF2	41	41	6	R1	2	C10	37 FP3	1.89376	1.89035	1.87733	1.7121	1.85846	8.23e-07	2.83e-07	3.98e-07	5.39e-08	1.26e-08	4.83e-07		1.70529	0.586411	0.825306	0.111609	0.0262027	1.15903	0.862792	1.24862	0.11741	0.37378	1.47131	0.679667	0.660972	0.95059	0.070102
NIL2	34	34	5	R3	2	F10	40 FP3	1.88186	1.88227	1.89024	1.73203	1.83262	1.52e-06	5.58e-07	2.22e-06	3.51e-08	4.8e-09	9.22e-07		1.65315	0.604905	2.41004	0.0380809	0.00520338	1.16703	0.856874	1.131	0.060369	0.351644	1.41654	0.705944	2.1309	0.630802	0.0147973
FLDF	34	34	5	R3	2	D12	40 FP3	1.88186	1.88227	1.89024	1.73203	1.83262	1.34e-06	6.54e-07	1.43e-06	2.06e-08	4.19e-09	9.37e-07		1.43272	0.697974	1.52979	0.0219848	0.0044679	1.16703	0.856874	1.131	0.060369	0.351644	1.22766	0.814559	1.3526	0.364174	0.0127058
ULLN	34	34	5	R3	2	C9	40 FP3	1.88186	1.88227	1.89024	1.73203	1.83262	1.2e-06	3.38e-07	1.4e-06	2.45e-08	1.49e-09	6.36e-07		1.88148	0.531498	2.1947	0.0384789	0.00234616	1.16703	0.856874	1.131	0.060369	0.351644	1.61219	0.620275	1.9405	0.637396	0.00667197
VRN2	34	34	5	R3	2	B10	40 FP3	1.88186	1.88227	1.89024	1.73203	1.83262	1.12e-06	3.8e-07	1.11e-06	2.21e-08	5.8e-09	6.51e-07		1.7154	0.582953	1.70852	0.0339683	0.00891448	1.16703	0.856874	1.131	0.060369	0.351644	1.46989	0.680325	1.51063	0.562678	0.0253509
VAL	34	34	5	R3	2	E12	40 FP3	1.88186	1.88227	1.89024	1.73203	1.83262	1.01e-06	5.64e-07	3.16e-06	3.9e-08	1.06e-08	7.56e-07		1.33975	0.746407	4.18016	0.0516402	0.0139866	1.16703	0.856874	1.131	0.060369	0.351644	1.148	0.871082	3.696	0.85541	0.0397749
FVEF	34	34	5	R3	2	F9	40 FP3	1.88186	1.88227	1.89024	1.73203	1.83262	1.15e-06	3.9e-07	8.83e-07	1.72e-08	7.71e-09	6.71e-07		1.71908	0.581708	1.31606	0.0255754	0.0114915	1.16703	0.856874	1.131	0.060369	0.351644	1.47303	0.678872	1.16363	0.423651	0.0326795
VIN3	41	41	6	R1	1	E9	37 FP3	1.89376	1.89035	1.87733	1.7121	1.85846	3.36e-06	4.53e-07	1.12e-06	1.29e-07	2.47e-09	1.23e-06		2.72356	0.367167	0.911555	0.104262	0.00200006	1.15903	0.862792	1.24862	0.11741	0.37378	2.34986	0.425557	0.730047	0.888014	0.00535091
VIN3	41	41	6	R2	2	C12	38 FP3	1.88424	1.88371	1.87288	1.74371	1.8741	4.29e-06	1.37e-06	1.65e-06	1.31e-07	3.18e-09	2.43e-06		1.76767	0.565716	0.678316	0.0537274	0.00130841	1.04674	0.955347	1.28768	0.0438876	0.312099	1.68874	0.592158	0.526772	1.2242	0.00419228
SF2	41	41	6	R1	1	D9	37 FP3	1.89376	1.89035	1.87733	1.7121	1.85846	6.17e-06	1.08e-06	2.4e-06	2.68e-07	3.03e-08	2.59e-06		2.38453	0.419371	0.927118	0.103451	0.0117323	1.15903	0.862792	1.24862	0.11741	0.37378	2.05735	0.486062	0.742511	0.88111	0.0313882
SF2	41	41	6	R2	2	E12	38 FP3	1.88424	1.88371	1.87288	1.74371	1.8741	1.79e-06	4.45e-07	6.63e-07	1.91e-08	9.06e-09	8.92e-07		2.00426	0.498937	0.743286	0.0214553	0.0101525	1.04674	0.955347	1.28768	0.0438876	0.312099	1.91476	0.522258	0.577227	0.488868	0.0325299
VIN3	41	41	6	R2	1	B3	42 FP1	1.90308	1.88404	1.88973	1.70096	1.849	1.3e-06	4.16e-07	6.78e-07	4.48e-08	8.19e-10	7.37e-07		1.77084	0.564703	0.91976	0.0607948	0.0011121	1.03003	0.970847	1.29221	0.126543	0.347439	1.71922	0.58166	0.711776	0.48043	0.00320086
VIN3	41	41	6	R3	2	H2	43 FP1	1.90691	1.88404	1.88879	1.70696	1.85024	2.1e-06	5.88e-07	1.56e-06	1.29e-07	1.52e-09	1.11e-06		1.8886	0.529494	1.40553	0.115665	0.00136807	1.22907	0.813622	1.60415	0.120469	0.387149	1.5366	0.650786	0.876186	0.960117	0.0035337
VIN3	48	48	7	R1	2	G11	37 FP3	1.89376	1.89035	1.87733	1.7121	1.85846	4.61e-06	1.67e-06	2.88e-06	3.12e-07	9.72e-09	2.77e-06		1.66287	0.601368	1.0398	0.112623	0.00350762	1.15903	0.862792	1.24862	0.11741	0.37378	1.43472	0.697002	0.832756	0.959229	0.00938419
SF2	41	41	6	R3	2	F2	43 FP1	1.90691	1.88404	1.88879	1.70696	1.85024	1.55e-06	6.09e-07	1.66e-06	1.08e-07	1.64e-08	9.71e-07		1.59257	0.627916	1.71021	0.110945	0.0168818	1.22907	0.813622	1.60415	0.120469	0.387149	1.29575	0.771753	1.06611	0.92094	0.0436054
VIN3	48	48	7	R3	2	D11	38 FP3	1.88424	1.88371	1.87288	1.74371	1.8741	2.52e-06	1.23e-06	2.17e-06	7.93e-08	1.88e-09	1.76e-06		1.43466	0.697032	1.23444	0.0450791	0.001069	1.04674	0.955347	1.28768	0.0438876	0.312099	1.37059	0.729611	0.958651	1.02715	0.0034252
SF2	48	48	7	R1	2	H11	37 FP3	1.89376	1.89035	1.87733	1.7121	1.85846	2.85e-06	7.67e-07	1.03e-06	6.29e-08	2.06e-07	1.48e-06		1.92841	0.518562	0.693694	0.0425442	0.139418	1.15903	0.862792	1.24862	0.11741	0.37378	1.66382	0.601028	0.555566	0.362355	0.372995
VIN3	48	48	7	R2	1	C2	41 FP1	1.89023	1.88812	1.9013	1.73901	1.84621	2.08e-06	4.63e-07	1.17e-06	7.01e-08	1.86e-09	9.8e-07		2.11831	0.472074	1.19744	0.0715067	0.00189655	1.0889	0.918361	1.1708	0.0588638	0.323463	1.94538	0.514039	1.02275	1.21478	0.00586326
VIN3	48	48	7	R1	1	H4	41 FP1	1.89023	1.88812	1.9013	1.73901	1.84621	1.44e-06	7.61e-07	6.91e-07	4.74e-08	3.13e-09	1.05e-06		1.37419	0.7277	0.660837	0.0453493	0.00298921	1.0889	0.918361	1.1708	0.0588638	0.323463	1.26201	0.792389	0.564433	0.770411	0.00924128
VIN3	48	48	7	R3	1	F1	42 FP1	1.90308	1.88404	1.88973	1.70096	1.849	1.1e-06	3.96e-07	7.79e-07	6.24e-08	1.13e-09	6.61e-07		1.67143	0.59829	1.17798	0.0944067	0.00171386	1.03003	0.970847	1.29221	0.126543	0.347439	1.6227	0.616256	0.911601	0.746047	0.00493283
VIN3	48	48	7	R2	2	D2	43 FP1	1.90691	1.88404	1.88879	1.70696	1.85024	1.72e-06	5.04e-07	1.5e-06	7.43e-08	1.37e-09	9.32e-07		1.84773	0.541204	1.60567	0.0797937	0.00146681	1.22907	0.813622	1.60415	0.120469	0.387149	1.50336	0.665178	1.00095	0.662357	0.00378874
SF2	48	48	7	R3	2	C11	38 FP3	1.88424	1.88371	1.87288	1.74371	1.8741	2.06e-06	6.92e-07	1.03e-06	4.75e-08	6.55e-08	1.19e-06		1.72559	0.57951	0.863543	0.0398024	0.0549125	1.04674	0.955347	1.28768	0.0438876	0.312099	1.64854	0.606597	0.670617	0.906917	0.175946
SF2	48	48	7	R2	1	D2	41 FP1	1.89023	1.88812	1.9013	1.73901	1.84621	1.82e-06	3.78e-07	5.24e-07	2.98e-08	1.51e-07	8.3e-07		2.19324	0.455946	0.631548	0.0359447	0.181671	1.0889	0.918361	1.1708	0.0588638	0.323463	2.01419	0.496478	0.539417	0.610642	0.561644
SF2	48	48	7	R1	1	F4	41 FP1	1.89023	1.88812	1.9013	1.73901	1.84621	2.37e-06	1.38e-06	1.6e-06	4.61e-08	8.23e-08	1.81e-06		1.31307	0.761576	0.884821	0.0255201	0.0455725	1.0889	0.918361	1.1708	0.0588638	0.323463	1.20587	0.829277	0.755742	0.433545	0.140889
SF2	48	48	7	R3	1	G1	42 FP1	1.90308	1.88404	1.88973	1.70096	1.849	1.08e-06	4.26e-07	5.09e-07	5.39e-08	4.49e-08	6.78e-07		1.59077	0.628627	0.750526	0.0793845	0.0662483	1.03003	0.970847	1.29221	0.126543	0.347439	1.54439	0.647504	0.58081	0.627334	0.190676
VARN	34	34	5	R2	1	D8	42 FP2	1.89407	1.90465	1.89517	1.73849	1.85328	2.33e-06	7.54e-07	3.69e-06	4.8e-08	4.04e-09	1.32e-06		1.75653	0.569304	2.78928	0.0362097	0.00305154	1.19087	0.839725	1.43321	0.0690586	0.326914	1.475	0.677964	1.94617	0.524334	0.00933439
FLDF	34	34	5	R2	1	G5	42 FP2	1.89407	1.90465	1.89517	1.73849	1.85328	2.17e-06	6.38e-07	1.33e-06	3.59e-08	2.27e-09	1.18e-06		1.84264	0.542701	1.13571	0.0305773	0.0019282	1.19087	0.839725	1.43321	0.0690586	0.326914	1.54731	0.646284	0.792425	0.442774	0.00589818
EDI	34	34	5	R2	1	G8	42 FP2	1.89407	1.90465	1.89517	1.73849	1.85328	1.95e-06	5.11e-07	2e-06	1.51e-08	9.03e-09	9.97e-07		1.95222	0.512237	2.00423	0.0151848	0.00905729	1.19087	0.839725	1.43321	0.0690586	0.326914	1.63933	0.610005	1.39841	0.219883	0.0277054
FVEF	34	34	5	R2	1	B7	042 FP2	1.89407	1.90465	1.89517	1.73849	1.85328	1.22e-06	5.09e-07	1.76e-06	1.27e-08	4.54e-09	7.9e-07		1.55112	0.644697	2.22497	0.0160583	0.00574609	1.19087	0.839725	1.43321	0.0690586	0.326914	1.30251	0.767748	1.55244	0.232531	0.0175768
COL	34	34	5	R2	1	B6	042 FP2	1.89407	1.90465	1.89517	1.73849	1.85328	1.92e-06	4.42e-07	1.18e-08	5.58e-10	3.25e-09	9.22e-07		2.08728	0.479092	0.0128395	0.000605888	0.00352873	1.19087	0.839725	1.43321	0.0690586	0.326914	1.75274	0.570534	0.00895851	0.00877354	0.0107941
VAL	34	34	5	R2	1	C6	42 FP2	1.89407	1.90465	1.89517	1.73849	1.85328	2.15e-06	4.43e-07	2.34e-06	4.53e-08	4.76e-09	9.76e-07		2.20273	0.453982	2.39647	0.0464471	0.00488017	1.19087	0.839725	1.43321	0.0690586	0.326914	1.84969	0.540632	1.6721	0.672576	0.014928
VAR	34	34	5	R2	1	B8	042 FP2	1.89407	1.90465	1.89517	1.73849	1.85328	2.22e-06	7.26e-07	4.68e-06	6.2e-08	2.05e-09	1.27e-06		1.74763	0.572202	3.68709	0.048868	0.00162009	1.19087	0.839725	1.43321	0.0690586	0.326914	1.46753	0.681416	2.5726	0.707632	0.00495571
LOV	34	34	5	R2	1	C8	42 FP2	1.89407	1.90465	1.89517	1.73849	1.85328	2.03e-06	4.7e-07	2.01e-06	2.55e-08	7.7e-09	9.76e-07		2.07613	0.481664	2.06392	0.0261554	0.00788545	1.19087	0.839725	1.43321	0.0690586	0.326914	1.74338	0.573598	1.44007	0.378743	0.0241209
NIL2	34	34	5	R2	1	C5	42 FP2	1.89407	1.90465	1.89517	1.73849	1.85328	1.97e-06	3.47e-07	1.55e-06	1.57e-08	2.45e-09	8.27e-07		2.38509	0.419271	1.87642	0.0190098	0.002956	1.19087	0.839725	1.43321	0.0690586	0.326914	2.00282	0.499296	1.30924	0.275271	0.00904214
EDIN	34	34	5	R2	1	E8	42 FP2	1.89407	1.90465	1.89517	1.73849	1.85328	2.13e-06	5.6e-07	2.05e-06	1.86e-08	3.07e-09	1.09e-06		1.94896	0.513095	1.8784	0.0170089	0.00281077	1.19087	0.839725	1.43321	0.0690586	0.326914	1.63659	0.611027	1.31062	0.246297	0.00859788
FCAF	34	34	5	R2	1	D6	42 FP2	1.89407	1.90465	1.89517	1.73849	1.85328	1.98e-06	3.89e-07	9.06e-07	2.25e-08	2.31e-09	8.77e-07		2.25728	0.443012	1.03314	0.0256952	0.00262883	1.19087	0.839725	1.43321	0.0690586	0.326914	1.89549	0.527568	0.720858	0.372078	0.00804135
SF2	48	48	7	R2	2	C2	43 FP1	1.90691	1.88404	1.88879	1.70696	1.85024	1.77e-06	5.79e-07	1.75e-06	9.73e-08	1.78e-07	1.01e-06		1.74873	0.571844	1.73033	0.0960953	0.175757	1.22907	0.813622	1.60415	0.120469	0.387149	1.4228	0.702837	1.07866	0.797674	0.453978
SDG8	34	34	5	R2	1	H7	42 FP2	1.89407	1.90465	1.89517	1.73849	1.85328	7.93e-07	2.18e-07	3.27e-08	1.2e-09	7.9e-10	4.15e-07		1.90918	0.523785	0.0787229	0.00287668	0.00190112	1.19087	0.839725	1.43321	0.0690586	0.326914	1.60319	0.623758	0.0549275	0.0416557	0.00581536
ULLN	34	34	5	R2	1	E6	42 FP2	1.89407	1.90465	1.89517	1.73849	1.85328	1.5e-06	2.65e-07	9.87e-07	1.52e-08	1.17e-09	6.3e-07		2.38337	0.419575	1.56491	0.0241307	0.00185848	1.19087	0.839725	1.43321	0.0690586	0.326914	2.00137	0.499657	1.09189	0.349424	0.00568491
VIN3-1	34	34	5	R2	1	F8	42 FP2	1.89407	1.90465	1.89517	1.73849	1.85328	1.91e-06	6.18e-07	1.2e-06	1.35e-08	0	1.09e-06		1.75753	0.568979	1.10108	0.0124021	0	1.19087	0.839725	1.43321	0.0690586	0.326914	1.47585	0.677578	0.768261	0.179588	0
BRON	34	34	5	R2	1	C7	42 FP2	1.89407	1.90465	1.89517	1.73849	1.85328	1.31e-06	3.92e-07	1.76e-06	2.08e-08	1.69e-09	7.17e-07		1.83091	0.546178	2.45829	0.0290165	0.00235631	1.19087	0.839725	1.43321	0.0690586	0.326914	1.53746	0.650424	1.71523	0.420172	0.00720776
NIL1	34	34	5	R2	1	D7	42 FP2	1.89407	1.90465	1.89517	1.73849	1.85328	2.01e-06	3.08e-07	2.1e-06	4.41e-08	3.18e-09	7.87e-07		2.55757	0.390996	2.67371	0.0560863	0.00403981	1.19087	0.839725	1.43321	0.0690586	0.326914	2.14766	0.465624	1.86554	0.812156	0.0123574
VIN3	55	55	8	R2	2	C6	34 FP2	1.887	1.906	1.887	1.758	1.884	3.43e-06	9.29e-07	2.26e-06	1.2e-07	4.32e-09	1.79e-06		1.9223	0.52021	1.26544	0.0673752	0.00241798	1.11716	0.895131	1.21766	0.0518166	0.32288	1.72071	0.581155	1.03923	1.30026	0.0074888
NDX	34	34	5	R2	1	E5	42 FP2	1.89407	1.90465	1.89517	1.73849	1.85328	2.16e-06	4.38e-07	1.26e-06	1.21e-08	4.19e-08	9.73e-07		2.22074	0.450299	1.28991	0.0124815	0.0430492	1.19087	0.839725	1.43321	0.0690586	0.326914	1.86482	0.536246	0.900013	0.180739	0.131684
LHP	34	34	5	R2	1	F6	42 FP2	1.89407	1.90465	1.89517	1.73849	1.85328	2.03e-06	3.82e-07	6.68e-07	1.75e-08	7.74e-09	8.81e-07		2.30731	0.433406	0.757423	0.0198201	0.00877841	1.19087	0.839725	1.43321	0.0690586	0.326914	1.9375	0.516128	0.528479	0.287004	0.0268524
VRN5	34	34	5	R2	1	D5	42 FP2	1.89407	1.90465	1.89517	1.73849	1.85328	1.63e-06	2.81e-07	9.41e-07	1.92e-08	8.64e-09	6.76e-07		2.40703	0.41545	1.39265	0.028433	0.0127834	1.19087	0.839725	1.43321	0.0690586	0.326914	2.02124	0.494746	0.971701	0.411722	0.0391033
BRO	34	34	5	R2	1	H5	42 FP2	1.89407	1.90465	1.89517	1.73849	1.85328	1.95e-06	4.58e-07	1.93e-06	2.24e-08	1.82e-09	9.46e-07		2.06307	0.484714	2.03919	0.0236352	0.00192244	1.19087	0.839725	1.43321	0.0690586	0.326914	1.73241	0.57723	1.42281	0.342249	0.00588058
ULL	34	34	5	R2	1	H6	42 FP2	1.89407	1.90465	1.89517	1.73849	1.85328	1.79e-06	3.93e-07	1.76e-06	3.3e-08	3.57e-09	8.39e-07		2.13429	0.46854	2.09795	0.0393454	0.00425108	1.19087	0.839725	1.43321	0.0690586	0.326914	1.79222	0.557968	1.46381	0.569739	0.0130037
VRN2	34	34	5	R2	1	E7	42 FP2	1.89407	1.90465	1.89517	1.73849	1.85328	1.2e-06	5.52e-07	2.72e-06	4.09e-08	6.58e-09	8.14e-07		1.47602	0.6775	3.3418	0.050185	0.00807593	1.19087	0.839725	1.43321	0.0690586	0.326914	1.23945	0.806811	2.33168	0.726702	0.0247035
VIN3	55	55	8	R1	1	D7	34 FP2	1.887	1.906	1.887	1.758	1.884	1.56e-06	3.1e-07	6.47e-07	2.73e-08	1.34e-09	6.95e-07		2.2422	0.44599	0.930961	0.0393101	0.00193236	1.11716	0.895131	1.21766	0.0518166	0.32288	2.00706	0.49824	0.764547	0.758639	0.00598477
EDI	34	34	5	R1	1	D7	43 FP2	1.90255	1.89726	1.89322	1.75825	1.86603	1.63e-06	6.69e-07	2.19e-06	2.26e-08	2.15e-08	1.04e-06		1.56102	0.640608	2.09529	0.0215863	0.0206231	1.29849	0.770125	1.59722	0.0486313	0.328576	1.20218	0.831823	1.31183	0.443878	0.0627652
BRON	34	34	5	R1	1	H8	43 FP2	1.90255	1.89726	1.89322	1.75825	1.86603	5.16e-06	1.35e-06	6.84e-06	4.55e-08	9.83e-09	2.64e-06		1.95513	0.511474	2.59092	0.0172326	0.00372471	1.29849	0.770125	1.59722	0.0486313	0.328576	1.5057	0.664144	1.62214	0.354352	0.0113359
NIL1	34	34	5	R1	1	B8	43 FP2	1.90255	1.89726	1.89322	1.75825	1.86603	3.92e-06	9e-07	6.3e-06	7.3e-08	8.91e-09	1.88e-06		2.08727	0.479096	3.35453	0.0388625	0.00474479	1.29849	0.770125	1.59722	0.0486313	0.328576	1.60746	0.622101	2.10023	0.799125	0.0144405
ULL	34	34	5	R1	1	F8	43 FP2	1.90255	1.89726	1.89322	1.75825	1.86603	3.45e-06	1.18e-06	7.13e-06	7.38e-08	1.25e-08	2.01e-06		1.71123	0.584376	3.54013	0.0366541	0.00619222	1.29849	0.770125	1.59722	0.0486313	0.328576	1.31786	0.758806	2.21643	0.753714	0.0188456
LHP	34	34	5	R1	1	E6	43 FP2	1.90255	1.89726	1.89322	1.75825	1.86603	3.12e-06	6.4e-07	1.95e-06	4.09e-08	2.74e-08	1.41e-06		2.20869	0.452757	1.38235	0.0289212	0.0193579	1.29849	0.770125	1.59722	0.0486313	0.328576	1.70097	0.587901	0.865473	0.594704	0.0589146
ULLN	34	34	5	R1	1	D6	43 FP2	1.90255	1.89726	1.89322	1.75825	1.86603	4.16e-06	6.59e-07	3.64e-06	5.42e-08	9.49e-09	1.66e-06		2.51205	0.398081	2.19967	0.0327189	0.00573004	1.29849	0.770125	1.59722	0.0486313	0.328576	1.9346	0.516904	1.37719	0.672797	0.017439
VIN3-1	34	34	5	R1	1	C6	43 FP2	1.90255	1.89726	1.89322	1.75825	1.86603	2.93e-06	7.99e-07	2.51e-06	3.19e-08	0	1.53e-06		1.91488	0.522227	1.63946	0.0208577	0	1.29849	0.770125	1.59722	0.0486313	0.328576	1.47469	0.678106	1.02644	0.428894	0
COL	34	34	5	R1	1	C5	43 FP2	1.90255	1.89726	1.89322	1.75825	1.86603	5.5e-06	1.15e-06	1.55e-07	1.27e-09	2.22e-08	2.51e-06		2.19002	0.456617	0.0618923	0.000504718	0.00886468	1.29849	0.770125	1.59722	0.0486313	0.328576	1.68659	0.592913	0.03875	0.0103785	0.0269791
FCAF	34	34	5	R1	1	B6	43 FP2	1.90255	1.89726	1.89322	1.75825	1.86603	3.62e-06	6.49e-07	2.75e-06	3.06e-08	1.31e-08	1.53e-06		2.36199	0.423372	1.79226	0.0199364	0.00852893	1.29849	0.770125	1.59722	0.0486313	0.328576	1.81903	0.549744	1.12211	0.409951	0.0259573
BRO	34	34	5	R1	1	D5	43 FP2	1.90255	1.89726	1.89322	1.75825	1.86603	5.18e-06	1.04e-06	8.77e-06	8.38e-08	1.53e-08	2.32e-06		2.23011	0.448408	3.77121	0.0360292	0.0065781	1.29849	0.770125	1.59722	0.0486313	0.328576	1.71747	0.582253	2.3611	0.740865	0.02002
SF2	55	55	8	R2	2	E6	34 FP2	1.887	1.906	1.887	1.758	1.884	2.85e-06	7.72e-07	1.33e-06	4.1e-08	5.39e-07	1.48e-06		1.92105	0.520548	0.897265	0.0276423	0.363369	1.11716	0.895131	1.21766	0.0518166	0.32288	1.71959	0.581533	0.736874	0.533464	1.1254
NIL2	34	34	5	R1	1	G7	43 FP2	1.90255	1.89726	1.89322	1.75825	1.86603	2.56e-06	1.14e-06	6.3e-06	5.55e-08	9.94e-09	1.71e-06		1.49829	0.667428	3.68602	0.0325135	0.00582088	1.29849	0.770125	1.59722	0.0486313	0.328576	1.15387	0.866649	2.30777	0.668571	0.0177155
NDX	34	34	5	R1	1	C8	43 FP2	1.90255	1.89726	1.89322	1.75825	1.86603	3.31e-06	1.04e-06	3.86e-06	4.66e-08	9.87e-08	1.85e-06		1.78388	0.560577	2.08115	0.025155	0.0532275	1.29849	0.770125	1.59722	0.0486313	0.328576	1.37381	0.727904	1.30298	0.51726	0.161995
LOV	34	34	5	R1	1	H5	43 FP2	1.90255	1.89726	1.89322	1.75825	1.86603	5.83e-06	8.38e-07	5.55e-06	8.11e-08	5.54e-08	2.21e-06		2.63747	0.379151	2.50823	0.0366936	0.0250518	1.29849	0.770125	1.59722	0.0486313	0.328576	2.03118	0.492324	1.57037	0.754528	0.0762435
VRN2	34	34	5	R1	1	E5	43 FP2	1.90255	1.89726	1.89322	1.75825	1.86603	6.59e-06	1.72e-06	9.25e-06	6.82e-08	2.97e-08	3.37e-06		1.95681	0.511035	2.74583	0.020244	0.00881046	1.29849	0.770125	1.59722	0.0486313	0.328576	1.50699	0.663574	1.71913	0.416275	0.0268141
VAL	34	34	5	R1	1	D8	43 FP2	1.90255	1.89726	1.89322	1.75825	1.86603	2.01e-06	6.43e-07	3.95e-06	3.67e-08	1.07e-08	1.14e-06		1.76706	0.565912	3.47636	0.0323475	0.00941189	1.29849	0.770125	1.59722	0.0486313	0.328576	1.36086	0.734831	2.1765	0.665158	0.0286445
EDIN	34	34	5	R1	1	E8	43 FP2	1.90255	1.89726	1.89322	1.75825	1.86603	2.96e-06	7.31e-07	2.76e-06	2.08e-08	7.21e-09	1.47e-06		2.01344	0.496663	1.87513	0.0141284	0.0049042	1.29849	0.770125	1.59722	0.0486313	0.328576	1.5506	0.644912	1.174	0.29052	0.0149256
FLDF	34	34	5	R1	1	G5	43 FP2	1.90255	1.89726	1.89322	1.75825	1.86603	5.85e-06	1.27e-06	3.07e-06	3.33e-08	1.66e-08	2.72e-06		2.14932	0.465264	1.13004	0.0122331	0.00611381	1.29849	0.770125	1.59722	0.0486313	0.328576	1.65524	0.604141	0.707504	0.251548	0.018607
VAR	34	34	5	R1	1	E7	43 FP2	1.90255	1.89726	1.89322	1.75825	1.86603	2.4e-06	1.02e-06	5.34e-06	7.22e-08	3.49e-09	1.57e-06		1.52973	0.653709	3.41135	0.046144	0.00223005	1.29849	0.770125	1.59722	0.0486313	0.328576	1.17809	0.848835	2.1358	0.948854	0.00678702
VRN5	34	34	5	R1	1	F6	43 FP2	1.90255	1.89726	1.89322	1.75825	1.86603	3.69e-06	1.15e-06	6.14e-06	5.03e-08	2.44e-08	2.05e-06		1.79355	0.557553	2.98788	0.0244973	0.0118682	1.29849	0.770125	1.59722	0.0486313	0.328576	1.38126	0.723977	1.87068	0.503736	0.03612
SDG8	34	34	5	R1	1	G6	43 FP2	1.90255	1.89726	1.89322	1.75825	1.86603	2.76e-06	6.55e-07	2.28e-07	1.38e-09	4.13e-09	1.35e-06		2.05471	0.486688	0.169323	0.00102632	0.00306813	1.29849	0.770125	1.59722	0.0486313	0.328576	1.58238	0.631959	0.106011	0.0211042	0.00933766
FVEF	34	34	5	R1	1	B7	43 FP2	1.90255	1.89726	1.89322	1.75825	1.86603	2.24e-06	8.61e-07	2.85e-06	2.25e-08	1.59e-08	1.39e-06		1.61144	0.620562	2.0556	0.0162472	0.0114607	1.29849	0.770125	1.59722	0.0486313	0.328576	1.24101	0.805793	1.28699	0.33409	0.0348799
VIN3-1	34	34	5	R2	2	D12	44 FP3	1.90031	1.88556	1.89571	1.76328	1.87429	2.88e-06	1.23e-06	3.59e-06	2.38e-08	0	1.89e-06		1.52927	0.653908	1.90182	0.0126429	0	1.10849	0.902128	1.40595	0.0402707	0.235881	1.3796	0.72485	1.35269	0.313948	0
COL	34	34	5	R2	2	B11	44 FP3	1.90031	1.88556	1.89571	1.76328	1.87429	1.77e-06	5.79e-07	3.06e-08	4.84e-10	3.41e-09	1.01e-06		1.74792	0.572108	0.0302005	0.000477958	0.00336731	1.10849	0.902128	1.40595	0.0402707	0.235881	1.57685	0.634176	0.0214804	0.0118686	0.0142755
VIN3	55	55	8	R3	1	F9	38 FP3	1.88424	1.88371	1.87288	1.74371	1.8741	7.87e-06	1.79e-06	3.49e-06	1.52e-07	6.71e-09	3.75e-06		2.09947	0.476311	0.930417	0.0405503	0.00178906	1.04674	0.955347	1.28768	0.0438876	0.312099	2.00572	0.498573	0.722551	0.923959	0.00573235
LOV	34	34	5	R2	2	F9	44 FP3	1.90031	1.88556	1.89571	1.76328	1.87429	3.18e-06	8.85e-07	3.44e-06	3.41e-08	8.41e-09	1.68e-06		1.89528	0.527627	2.04948	0.0203044	0.00501393	1.10849	0.902128	1.40595	0.0402707	0.235881	1.70979	0.584869	1.45772	0.504198	0.0212561
VAR	34	34	5	R2	2	B10	44 FP3	1.90031	1.88556	1.89571	1.76328	1.87429	2.7e-06	7.15e-07	4.69e-06	5.54e-08	1.17e-09	1.39e-06		1.94478	0.514198	3.37395	0.0398623	0.000841344	1.10849	0.902128	1.40595	0.0402707	0.235881	1.75444	0.569983	2.39976	0.989857	0.00356681
NDX	34	34	5	R2	2	H12	44 FP3	1.90031	1.88556	1.89571	1.76328	1.87429	2.25e-06	9.83e-07	2.07e-06	1.89e-08	5.38e-08	1.49e-06		1.51138	0.661646	1.38964	0.0126887	0.03618	1.10849	0.902128	1.40595	0.0402707	0.235881	1.36346	0.733428	0.988398	0.315084	0.153382
VAL	34	34	5	R2	2	D11	44 FP3	1.90031	1.88556	1.89571	1.76328	1.87429	2.21e-06	7.65e-07	4.83e-06	5.22e-08	7.77e-09	1.3e-06		1.69967	0.588349	3.7137	0.0400952	0.00597034	1.10849	0.902128	1.40595	0.0402707	0.235881	1.53332	0.652179	2.64141	0.995641	0.0253108
FVEF	34	34	5	R2	2	F10	44 FP3	1.90031	1.88556	1.89571	1.76328	1.87429	2e-06	5.3e-07	1.72e-06	8.05e-09	4.23e-09	1.03e-06		1.94444	0.514286	1.66978	0.00780513	0.00410137	1.10849	0.902128	1.40595	0.0402707	0.235881	1.75414	0.570081	1.18765	0.193816	0.0173875
VRN5	34	34	5	R2	2	D10	44 FP3	1.90031	1.88556	1.89571	1.76328	1.87429	2.89e-06	6.79e-07	2.26e-06	3.99e-08	9.63e-09	1.4e-06		2.06375	0.484556	1.61117	0.0284628	0.006874	1.10849	0.902128	1.40595	0.0402707	0.235881	1.86176	0.537125	1.14596	0.706786	0.0291418
LHP	34	34	5	R2	2	E10	44 FP3	1.90031	1.88556	1.89571	1.76328	1.87429	3.06e-06	7.18e-07	1.34e-06	1.27e-08	1.34e-08	1.48e-06		2.06659	0.483889	0.900365	0.00854356	0.00906508	1.10849	0.902128	1.40595	0.0402707	0.235881	1.86433	0.536386	0.640395	0.212153	0.0384307
SF2	55	55	8	R3	1	G9	38 FP3	1.88424	1.88371	1.87288	1.74371	1.8741	3.04e-06	7.41e-07	9.46e-07	5.74e-08	5.4e-07	1.5e-06		2.02436	0.493983	0.630417	0.0382527	0.359688	1.04674	0.955347	1.28768	0.0438876	0.312099	1.93397	0.517072	0.489575	0.871605	1.15248
FCAF	34	34	5	R2	2	C9	44 FP3	1.90031	1.88556	1.89571	1.76328	1.87429	1.74e-06	7.76e-07	2.33e-06	1.19e-08	1.77e-09	1.16e-06		1.49532	0.668753	2.00726	0.0102428	0.00152307	1.10849	0.902128	1.40595	0.0402707	0.235881	1.34897	0.741306	1.42769	0.254348	0.00645692
ULL	34	34	5	R2	2	G10	44 FP3	1.90031	1.88556	1.89571	1.76328	1.87429	2.11e-06	4.1e-07	2.7e-06	2.29e-08	3.91e-09	9.3e-07		2.26563	0.441379	2.90764	0.0246017	0.00419979	1.10849	0.902128	1.40595	0.0402707	0.235881	2.04389	0.489264	2.06809	0.610907	0.0178047
FLDF	34	34	5	R2	2	E12	44 FP3	1.90031	1.88556	1.89571	1.76328	1.87429	2.92e-06	9.53e-07	2.08e-06	2.13e-08	3.62e-09	1.67e-06		1.75041	0.571294	1.24636	0.0127858	0.0021688	1.10849	0.902128	1.40595	0.0402707	0.235881	1.5791	0.633273	0.886491	0.317496	0.00919447
EDIN	34	34	5	R2	2	B12	44 FP3	1.90031	1.88556	1.89571	1.76328	1.87429	1.9e-06	7.19e-07	2.09e-06	1.87e-08	5.2e-09	1.17e-06		1.62491	0.615417	1.78538	0.0160215	0.00444882	1.10849	0.902128	1.40595	0.0402707	0.235881	1.46588	0.682184	1.26987	0.397845	0.0188604
BRO	34	34	5	R2	2	E11	44 FP3	1.90031	1.88556	1.89571	1.76328	1.87429	1.86e-06	6.76e-07	3.36e-06	2.1e-08	2.12e-09	1.12e-06		1.65887	0.60282	2.99836	0.0187384	0.00188797	1.10849	0.902128	1.40595	0.0402707	0.235881	1.49651	0.66822	2.13262	0.465311	0.00800389
NIL2	34	34	5	R2	2	G12	44 FP3	1.90031	1.88556	1.89571	1.76328	1.87429	2.51e-06	1.12e-06	3.74e-06	4.87e-08	4.28e-09	1.67e-06		1.49834	0.667405	2.23581	0.02911	0.00255552	1.10849	0.902128	1.40595	0.0402707	0.235881	1.3517	0.739811	1.59024	0.722857	0.0108339
SDG8	34	34	5	R2	2	C12	44 FP3	1.90031	1.88556	1.89571	1.76328	1.87429	4.08e-06	1.13e-06	2.46e-07	3.37e-09	2.3e-09	2.14e-06		1.90204	0.525752	0.114721	0.00157026	0.00107312	1.10849	0.902128	1.40595	0.0402707	0.235881	1.71588	0.58279	0.0815966	0.0389926	0.00454939
NIL1	34	34	5	R2	2	F12	44 FP3	1.90031	1.88556	1.89571	1.76328	1.87429	2.03e-06	6.29e-07	2.93e-06	4.24e-08	4.82e-09	1.13e-06		1.79817	0.556122	2.59474	0.0374474	0.00426018	1.10849	0.902128	1.40595	0.0402707	0.235881	1.62218	0.616456	1.84554	0.929891	0.0180607
ULLN	34	34	5	R2	2	H9	44 FP3	1.90031	1.88556	1.89571	1.76328	1.87429	5.25e-06	1.11e-06	3.33e-06	2.5e-08	3.03e-09	2.41e-06		2.17537	0.459692	1.37901	0.01037	0.00125643	1.10849	0.902128	1.40595	0.0402707	0.235881	1.96246	0.509564	0.980834	0.257507	0.00532654
EDI	34	34	5	R2	2	B9	44 FP3	1.90031	1.88556	1.89571	1.76328	1.87429	1.65e-06	5.09e-07	1.64e-06	1.39e-08	5.13e-09	9.17e-07		1.80305	0.554617	1.78642	0.0151479	0.0055947	1.10849	0.902128	1.40595	0.0402707	0.235881	1.62658	0.614787	1.27061	0.376151	0.0237183
VRN2	34	34	5	R2	2	F11	44 FP3	1.90031	1.88556	1.89571	1.76328	1.87429	1.19e-06	4.31e-07	1.37e-06	2.03e-08	4.33e-09	7.17e-07		1.66061	0.602189	1.91823	0.0282693	0.0060416	1.10849	0.902128	1.40595	0.0402707	0.235881	1.49808	0.667521	1.36436	0.701981	0.0256129
VARN	34	34	5	R2	2	E9	44 FP3	1.90031	1.88556	1.89571	1.76328	1.87429	3.19e-06	8.41e-07	3.34e-06	1.89e-08	2.75e-09	1.64e-06		1.94695	0.513625	2.03921	0.011517	0.00167989	1.10849	0.902128	1.40595	0.0402707	0.235881	1.75639	0.569348	1.45041	0.285989	0.00712176
BRON	34	34	5	R2	2	D9	44 FP3	1.90031	1.88556	1.89571	1.76328	1.87429	3.34e-06	9.44e-07	4.47e-06	2.48e-08	4.88e-09	1.78e-06		1.88226	0.531276	2.51782	0.0139727	0.0027477	1.10849	0.902128	1.40595	0.0402707	0.235881	1.69804	0.588914	1.79083	0.346968	0.0116487
VRN5	62	62	9	R2	1	B6	33 FP2	1.88744	1.89703	1.88544	1.76435	1.8921	3.94e-06	1.46e-06	3.82e-06	2.15e-07	5.11e-07	2.4e-06		1.6424	0.608867	1.59142	0.0895572	0.212916	1.08718	0.919807	1.11077	0.0529241	0.238933	1.51069	0.66195	1.43271	1.69218	0.891114
NDX	62	62	9	R2	1	F5	33 FP2	1.88744	1.89703	1.88544	1.76435	1.8921	2.07e-06	1.22e-06	6.7e-07	4.1e-08	5.23e-07	1.59e-06		1.30509	0.766233	0.421982	0.0258555	0.329407	1.08718	0.919807	1.11077	0.0529241	0.238933	1.20043	0.833037	0.379899	0.48854	1.37866
FLDF	62	62	9	R2	1	G7	33 FP2	1.88744	1.89703	1.88544	1.76435	1.8921	2.57e-06	1.99e-06	1.32e-06	4.88e-08	3.68e-07	2.26e-06		1.13494	0.881103	0.582566	0.0215785	0.162919	1.08718	0.919807	1.11077	0.0529241	0.238933	1.04393	0.957922	0.524469	0.407724	0.681863
ULLN	62	62	9	R2	1	G6	33 FP2	1.88744	1.89703	1.88544	1.76435	1.8921	2.34e-06	1.08e-06	1.35e-06	1.02e-07	3.67e-07	1.59e-06		1.47175	0.679461	0.851486	0.0641517	0.230674	1.08718	0.919807	1.11077	0.0529241	0.238933	1.35373	0.7387	0.76657	1.21215	0.965437
LHP	62	62	9	R2	1	C6	33 FP2	1.88744	1.89703	1.88544	1.76435	1.8921	3.23e-06	1.21e-06	7.32e-07	4.14e-08	3.54e-07	1.98e-06		1.63328	0.612264	0.369858	0.0209525	0.178782	1.08718	0.919807	1.11077	0.0529241	0.238933	1.50231	0.665644	0.332974	0.395897	0.748251
VAR	62	62	9	R2	1	F6	33 FP2	1.88744	1.89703	1.88544	1.76435	1.8921	2.63e-06	1.28e-06	2.6e-06	1.14e-07	1.62e-07	1.84e-06		1.42961	0.699492	1.41532	0.0621241	0.0883276	1.08718	0.919807	1.11077	0.0529241	0.238933	1.31496	0.760478	1.27417	1.17383	0.369676
COL	62	62	9	R2	1	G5	33 FP2	1.88744	1.89703	1.88544	1.76435	1.8921	2.57e-06	1.5e-06	1.13e-08	0	2.57e-07	1.96e-06		1.31085	0.762865	0.00577552	0	0.13093	1.08718	0.919807	1.11077	0.0529241	0.238933	1.20573	0.829376	0.00519955	0	0.547977
VARN	62	62	9	R2	1	G8	33 FP2	1.88744	1.89703	1.88544	1.76435	1.8921	2.54e-06	2.04e-06	2.99e-06	1.1e-07	2.67e-07	2.28e-06		1.11661	0.895566	1.31211	0.048429	0.117306	1.08718	0.919807	1.11077	0.0529241	0.238933	1.02707	0.973646	1.18126	0.915065	0.49096
BRON	62	62	9	R2	1	E7	33 FP2	1.88744	1.89703	1.88544	1.76435	1.8921	4.01e-06	2.62e-06	3.67e-06	1.44e-07	4.36e-07	3.24e-06		1.23778	0.807897	1.13189	0.0445879	0.134791	1.08718	0.919807	1.11077	0.0529241	0.238933	1.13852	0.878334	1.01901	0.842488	0.56414
EDI	62	62	9	R2	1	B5	33 FP2	1.88744	1.89703	1.88544	1.76435	1.8921	3.29e-06	1.13e-06	8.42e-07	4.05e-08	4.42e-07	1.93e-06		1.70387	0.586898	0.435856	0.0209668	0.228671	1.08718	0.919807	1.11077	0.0529241	0.238933	1.56724	0.638066	0.392389	0.396167	0.95705
LOV	62	62	9	R2	1	E8	33 FP2	1.88744	1.89703	1.88544	1.76435	1.8921	2.6e-06	2.17e-06	3.51e-06	1.57e-07	4.71e-07	2.37e-06		1.09431	0.913814	1.48051	0.0663371	0.198711	1.08718	0.919807	1.11077	0.0529241	0.238933	1.00656	0.993485	1.33286	1.25344	0.831661
VAL	62	62	9	R2	1	H8	33 FP2	1.88744	1.89703	1.88544	1.76435	1.8921	3.88e-06	3.01e-06	5.23e-06	3.59e-07	1.01e-06	3.42e-06		1.13456	0.8814	1.53017	0.105057	0.296793	1.08718	0.919807	1.11077	0.0529241	0.238933	1.04357	0.958245	1.37757	1.98505	1.24216
NIL1	62	62	9	R2	1	E6	33 FP2	1.88744	1.89703	1.88544	1.76435	1.8921	1.62e-06	5.25e-07	1.03e-06	4.61e-08	1.82e-07	9.23e-07		1.75888	0.568544	1.11643	0.0499455	0.197094	1.08718	0.919807	1.11077	0.0529241	0.238933	1.61783	0.618113	1.00509	0.943718	0.824895
FVEF	62	62	9	R2	1	H6	33 FP2	1.88744	1.89703	1.88544	1.76435	1.8921	2.72e-06	1.19e-06	1.17e-06	5.6e-08	3.44e-07	1.8e-06		1.51061	0.661985	0.647016	0.0310719	0.191242	1.08718	0.919807	1.11077	0.0529241	0.238933	1.38947	0.7197	0.582491	0.587102	0.800401
EDIN	62	62	9	R2	1	H7	33 FP2	1.88744	1.89703	1.88544	1.76435	1.8921	1.65e-06	1.32e-06	9.75e-07	4.33e-08	2.46e-07	1.48e-06		1.11649	0.895668	0.660074	0.0293512	0.166884	1.08718	0.919807	1.11077	0.0529241	0.238933	1.02695	0.973757	0.594247	0.55459	0.698457
NIL2	62	62	9	R2	1	H5	33 FP2	1.88744	1.89703	1.88544	1.76435	1.8921	2.68e-06	9.84e-07	1.28e-06	4.96e-08	2.52e-07	1.63e-06		1.65142	0.60554	0.786218	0.0305125	0.154971	1.08718	0.919807	1.11077	0.0529241	0.238933	1.51899	0.658334	0.707811	0.576533	0.648597
FCAF	62	62	9	R2	1	F7	33 FP2	1.88744	1.89703	1.88544	1.76435	1.8921	4.02e-06	1.53e-06	1.26e-06	6.53e-08	3.77e-07	2.48e-06		1.61902	0.617658	0.507511	0.0263387	0.15187	1.08718	0.919807	1.11077	0.0529241	0.238933	1.48919	0.671508	0.456899	0.497669	0.635617
SDG8	62	62	9	R2	1	F8	33 FP2	1.88744	1.89703	1.88544	1.76435	1.8921	1.5e-06	1.39e-06	2.82e-07	3.33e-09	4.48e-07	1.44e-06		1.03807	0.963329	0.195529	0.00231212	0.310814	1.08718	0.919807	1.11077	0.0529241	0.238933	0.954821	1.04732	0.17603	0.0436874	1.30084
BRO	62	62	9	R2	1	D7	33 FP2	1.88744	1.89703	1.88544	1.76435	1.8921	3.13e-06	1.34e-06	2.96e-06	1.88e-07	6.84e-07	2.05e-06		1.52695	0.6549	1.44237	0.0914151	0.333182	1.08718	0.919807	1.11077	0.0529241	0.238933	1.4045	0.711997	1.29853	1.72729	1.39446
VIN3	55	55	8	R3	2	G1	41 FP1	1.89023	1.88812	1.9013	1.73901	1.84621	2.83e-06	1.45e-06	2.39e-06	1.98e-07	5.77e-09	2.02e-06		1.39851	0.715048	1.18405	0.0981297	0.00285182	1.0889	0.918361	1.1708	0.0588638	0.323463	1.28434	0.778612	1.01132	1.66706	0.00881651
SF2	55	55	8	R3	2	F1	41 FP1	1.89023	1.88812	1.9013	1.73901	1.84621	2.32e-06	1.27e-06	8.79e-07	5.02e-08	3.69e-07	1.72e-06		1.35247	0.739389	0.511877	0.0292226	0.215176	1.0889	0.918361	1.1708	0.0588638	0.323463	1.24205	0.805118	0.437204	0.496444	0.665228
VIN3-1	62	62	9	R2	1	C5	33 FP2	1.88744	1.89703	1.88544	1.76435	1.8921	3.38e-06	1.74e-06	3.8e-06	1.84e-07	0	2.43e-06		1.39299	0.717881	1.56741	0.0757371	0	1.08718	0.919807	1.11077	0.0529241	0.238933	1.28128	0.78047	1.41109	1.43105	0
ULL	62	62	9	R2	1	C8	33 FP2	1.88744	1.89703	1.88544	1.76435	1.8921	3.42e-06	1.52e-06	2.47e-06	1.33e-07	4.85e-07	2.28e-06		1.5021	0.665734	1.08651	0.0582367	0.213052	1.08718	0.919807	1.11077	0.0529241	0.238933	1.38164	0.723776	0.978159	1.10038	0.891684
VRN2	62	62	9	R2	1	D5	33 FP2	1.88744	1.89703	1.88544	1.76435	1.8921	1.89e-06	1.28e-06	3.79e-06	9.13e-08	2.54e-07	1.56e-06		1.21579	0.822508	2.43335	0.0586437	0.162966	1.08718	0.919807	1.11077	0.0529241	0.238933	1.1183	0.894218	2.19068	1.10807	0.682057
NIL1	62	62	9	R1	1	D3	34 FP1	1.903	1.911	1.893	1.689	1.888	1.89e-06	1.24e-06	2.47e-06	2.24e-07	3.76e-07	1.53e-06		1.23661	0.808664	1.61618	0.146342	0.245663	1.16031	0.861841	1.28799	0.232944	0.345792	1.06576	0.938299	1.25481	0.628229	0.710435
SDG8	62	62	9	R1	1	G1	34 FP1	1.903	1.911	1.893	1.689	1.888	2.34e-06	4.07e-07	1.5e-08	0	7.63e-08	9.76e-07		2.39742	0.417116	0.0153508	0	0.0781955	1.16031	0.861841	1.28799	0.232944	0.345792	2.06619	0.483982	0.0119184	0	0.226134
COL	62	62	9	R1	1	H1	34 FP1	1.903	1.911	1.893	1.689	1.888	2.2e-06	4.46e-07	1.43e-08	0	1.89e-07	9.89e-07		2.22038	0.450374	0.014444	0	0.191513	1.16031	0.861841	1.28799	0.232944	0.345792	1.91361	0.522572	0.0112144	0	0.553838
VIN3-1	62	62	9	R1	1	D4	34 FP1	1.903	1.911	1.893	1.689	1.888	2.74e-06	5.75e-07	7.59e-07	8.51e-08	7.65e-10	1.26e-06		2.1828	0.458126	0.604702	0.0677515	0.000608939	1.16031	0.861841	1.28799	0.232944	0.345792	1.88123	0.531567	0.469494	0.290848	0.001761
EDIN	62	62	9	R1	1	H4	34 FP1	1.903	1.911	1.893	1.689	1.888	1.12e-06	4.65e-07	3.33e-07	2.94e-08	1.72e-07	7.23e-07		1.5538	0.643582	0.460869	0.0407168	0.237821	1.16031	0.861841	1.28799	0.232944	0.345792	1.33913	0.746753	0.357821	0.174792	0.687755
VAR	62	62	9	R1	1	E3	34 FP1	1.903	1.911	1.893	1.689	1.888	2.99e-06	7.54e-07	1.53e-06	2.74e-07	1.87e-07	1.5e-06		1.98988	0.502542	1.01758	0.182226	0.124247	1.16031	0.861841	1.28799	0.232944	0.345792	1.71496	0.583103	0.790051	0.782272	0.359312
VARN	62	62	9	R1	1	F3	34 FP1	1.903	1.911	1.893	1.689	1.888	2.05e-06	5.46e-07	5.68e-07	5.83e-08	2.24e-07	1.06e-06		1.93856	0.515847	0.53633	0.0550538	0.21139	1.16031	0.861841	1.28799	0.232944	0.345792	1.67073	0.598542	0.416409	0.236339	0.61132
LHP	62	62	9	R1	1	G3	34 FP1	1.903	1.911	1.893	1.689	1.888	5.49e-08	1.75e-08	7.87e-09	0	7.16e-09	3.1e-08		1.76945	0.565148	0.25359	0	0.230881	1.16031	0.861841	1.28799	0.232944	0.345792	1.52498	0.655745	0.196889	0	0.667687
VRN2	62	62	9	R1	1	F2	34 FP1	1.903	1.911	1.893	1.689	1.888	3.13e-06	7.44e-07	1.5e-06	1.91e-07	3.78e-07	1.53e-06		2.05064	0.487653	0.985019	0.124902	0.247909	1.16031	0.861841	1.28799	0.232944	0.345792	1.76732	0.565828	0.764773	0.536189	0.71693
VRN5	62	62	9	R1	1	D2	34 FP1	1.903	1.911	1.893	1.689	1.888	1.8e-06	4.97e-07	1.11e-06	9.8e-08	2.7e-07	9.47e-07		1.90379	0.525268	1.17088	0.103486	0.28501	1.16031	0.861841	1.28799	0.232944	0.345792	1.64076	0.609472	0.909079	0.44425	0.824223
ULL	62	62	9	R1	1	B1	34 FP1	1.903	1.911	1.893	1.689	1.888	2.12e-06	3.88e-07	1.17e-06	3.49e-07	3.09e-07	9.07e-07		2.33921	0.427495	1.28924	0.385211	0.340181	1.16031	0.861841	1.28799	0.232944	0.345792	2.01603	0.496025	1.00098	1.65366	0.983772
VAL	62	62	9	R1	1	F4	34 FP1	1.903	1.911	1.893	1.689	1.888	1.7e-06	5.29e-07	6.28e-07	6.26e-08	4.12e-07	9.47e-07		1.78975	0.558738	0.662958	0.0661297	0.434894	1.16031	0.861841	1.28799	0.232944	0.345792	1.54248	0.648308	0.514724	0.283886	1.25767
FCAF	62	62	9	R1	1	C3	34 FP1	1.903	1.911	1.893	1.689	1.888	1.66e-06	4.87e-07	3.84e-07	4.74e-08	2.17e-07	8.99e-07		1.8447	0.542095	0.427793	0.0527483	0.241577	1.16031	0.861841	1.28799	0.232944	0.345792	1.58983	0.628997	0.332141	0.226442	0.698619
LOV	62	62	9	R1	1	E1	34 FP1	1.903	1.911	1.893	1.689	1.888	2.78e-06	4.21e-07	6e-07	1.56e-07	4.1e-07	1.08e-06		2.57236	0.388749	0.55384	0.144058	0.378322	1.16031	0.861841	1.28799	0.232944	0.345792	2.21696	0.451068	0.430004	0.618421	1.09407
ULLN	62	62	9	R1	1	B2	34 FP1	1.903	1.911	1.893	1.689	1.888	2.01e-06	6.59e-07	1.04e-06	1.51e-07	4.22e-07	1.15e-06		1.74577	0.572812	0.906994	0.131303	0.366942	1.16031	0.861841	1.28799	0.232944	0.345792	1.50458	0.664638	0.704194	0.563668	1.06116
FVEF	62	62	9	R1	1	H2	34 FP1	1.903	1.911	1.893	1.689	1.888	1.11e-06	1.97e-07	2.28e-07	3.82e-08	1.44e-07	4.67e-07		2.37844	0.420444	0.488493	0.0817544	0.308978	1.16031	0.861841	1.28799	0.232944	0.345792	2.04984	0.487844	0.379268	0.350961	0.893537
NDX	62	62	9	R1	1	B3	34 FP1	1.903	1.911	1.893	1.689	1.888	3.17e-06	6.24e-07	2.8e-07	3.84e-08	8.4e-07	1.41e-06		2.25268	0.443916	0.199276	0.0273002	0.597284	1.16031	0.861841	1.28799	0.232944	0.345792	1.94145	0.515079	0.154719	0.117196	1.72729
BRON	62	62	9	R1	1	E4	34 FP1	1.903	1.911	1.893	1.689	1.888	2.08e-06	4.32e-07	4.94e-07	4.14e-08	2.76e-07	9.48e-07		2.19598	0.455378	0.521032	0.0436414	0.291333	1.16031	0.861841	1.28799	0.232944	0.345792	1.89258	0.528379	0.404532	0.187347	0.842508
BRO	62	62	9	R1	1	E2	34 FP1	1.903	1.911	1.893	1.689	1.888	1.96e-06	3.93e-07	9.56e-07	8.77e-08	1.62e-07	8.77e-07		2.23448	0.447532	1.08996	0.0999056	0.185193	1.16031	0.861841	1.28799	0.232944	0.345792	1.92576	0.519274	0.846251	0.428882	0.535562
NIL2	62	62	9	R1	1	B4	34 FP1	1.903	1.911	1.893	1.689	1.888	2.1e-06	6.32e-07	6.82e-07	1.02e-07	5.43e-07	1.15e-06		1.82434	0.548144	0.591866	0.088573	0.471414	1.16031	0.861841	1.28799	0.232944	0.345792	1.57229	0.636016	0.459528	0.380232	1.36329
EDI	62	62	9	R1	1	G2	34 FP1	1.903	1.911	1.893	1.689	1.888	1.95e-06	3.67e-07	3.34e-07	5.45e-08	2.54e-07	8.46e-07		2.30357	0.434109	0.395097	0.064404	0.300559	1.16031	0.861841	1.28799	0.232944	0.345792	1.98531	0.5037	0.306755	0.276478	0.869188
FLDF	62	62	9	R1	1	C2	34 FP1	1.903	1.911	1.893	1.689	1.888	1.62e-06	4.53e-07	3.86e-07	5.77e-08	2.43e-07	8.55e-07		1.8895	0.52924	0.451571	0.0674208	0.284368	1.16031	0.861841	1.28799	0.232944	0.345792	1.62845	0.614081	0.350602	0.289429	0.822365
VIN3-1	62	62	9	R3	1	D11	35 FP3	1.89555	1.92418	1.90102	1.75903	1.91814	3.02e-06	7.22e-07	8.13e-07	5.91e-08	2.19e-08	1.48e-06		2.04461	0.48909	0.55085	0.040041	0.0148398	1.26262	0.792003	1.18778	0.0608761	0.224401	1.61934	0.617536	0.463763	0.657746	0.0661308
VRN2	62	62	9	R3	1	B11	35 FP3	1.89555	1.92418	1.90102	1.75903	1.91814	2.43e-06	6.27e-07	1.02e-06	8.17e-08	1.81e-07	1.23e-06		1.96838	0.508033	0.823448	0.0662594	0.146754	1.26262	0.792003	1.18778	0.0608761	0.224401	1.55896	0.641453	0.693265	1.08843	0.653982
ULL	62	62	9	R3	1	F10	35 FP3	1.89555	1.92418	1.90102	1.75903	1.91814	1.98e-06	4.1e-07	5.03e-07	2.58e-08	1.71e-07	9e-07		2.19566	0.455444	0.559163	0.0287045	0.189802	1.26262	0.792003	1.18778	0.0608761	0.224401	1.73897	0.575053	0.470762	0.471523	0.845816
VIN3	55	55	8	R2	1	B2	43 FP1	1.90691	1.88404	1.88879	1.70696	1.85024	3.87e-06	9.12e-07	2.86e-06	2.63e-07	4.66e-09	1.88e-06		2.06128	0.485135	1.5228	0.139683	0.00247719	1.22907	0.813622	1.60415	0.120469	0.387149	1.6771	0.596266	0.949289	1.15949	0.00639855
ULLN	62	62	9	R3	1	E11	35 FP3	1.89555	1.92418	1.90102	1.75903	1.91814	2.86e-06	9.82e-07	1.2e-06	8.89e-08	3.93e-07	1.68e-06		1.70601	0.586162	0.714838	0.0530443	0.234715	1.26262	0.792003	1.18778	0.0608761	0.224401	1.35117	0.740101	0.601826	0.871348	1.04596
LOV	62	62	9	R3	1	G9	35 FP3	1.89555	1.92418	1.90102	1.75903	1.91814	3.3e-06	6.53e-07	1.05e-06	7.84e-08	4.23e-07	1.47e-06		2.24743	0.444953	0.716113	0.0534479	0.288554	1.26262	0.792003	1.18778	0.0608761	0.224401	1.77997	0.561807	0.602899	0.877979	1.28589
EDI	62	62	9	R3	1	H12	35 FP3	1.89555	1.92418	1.90102	1.75903	1.91814	2.47e-06	7.56e-07	4.57e-07	3.23e-08	2.12e-07	1.37e-06		1.80747	0.55326	0.334324	0.0236685	0.154876	1.26262	0.792003	1.18778	0.0608761	0.224401	1.43152	0.698559	0.281469	0.388798	0.690177
BRO	62	62	9	R3	1	C10	35 FP3	1.89555	1.92418	1.90102	1.75903	1.91814	3.44e-06	6.58e-07	1.39e-06	7.39e-08	3.54e-07	1.5e-06		2.2863	0.437389	0.923309	0.0491814	0.235584	1.26262	0.792003	1.18778	0.0608761	0.224401	1.81075	0.552256	0.777339	0.807893	1.04984
COL	62	62	9	R3	1	G12	35 FP3	1.89555	1.92418	1.90102	1.75903	1.91814	2.52e-06	7.27e-07	3.7e-09	0	1.24e-07	1.35e-06		1.86212	0.537023	0.00272833	0	0.0918618	1.26262	0.792003	1.18778	0.0608761	0.224401	1.4748	0.678057	0.002297	0	0.409364
FLDF	62	62	9	R3	1	G11	35 FP3	1.89555	1.92418	1.90102	1.75903	1.91814	3.73e-06	7.36e-07	4.32e-07	3.73e-08	3.16e-07	1.66e-06		2.25333	0.443787	0.260548	0.0224856	0.190839	1.26262	0.792003	1.18778	0.0608761	0.224401	1.78465	0.560335	0.219357	0.369366	0.850435
VRN5	62	62	9	R3	1	C12	35 FP3	1.89555	1.92418	1.90102	1.75903	1.91814	2.05e-06	9.07e-07	1.21e-06	7.32e-08	1.8e-07	1.36e-06		1.50244	0.665582	0.889234	0.0536883	0.132041	1.26262	0.792003	1.18778	0.0608761	0.224401	1.18994	0.840378	0.748651	0.881928	0.588417
SF2	55	55	8	R2	1	B1	43 FP1	1.90691	1.88404	1.88879	1.70696	1.85024	4.16e-06	1.06e-06	2.39e-06	2.09e-07	3.79e-07	2.1e-06		1.9773	0.505739	1.13678	0.0992315	0.180513	1.22907	0.813622	1.60415	0.120469	0.387149	1.60878	0.62159	0.708648	0.823707	0.466263
SDG8	62	62	9	R3	1	F11	35 FP3	1.89555	1.92418	1.90102	1.75903	1.91814	2.24e-06	6.51e-07	4.5e-08	4.95e-09	4.99e-08	1.21e-06		1.85543	0.53896	0.0372865	0.00409861	0.0412849	1.26262	0.792003	1.18778	0.0608761	0.224401	1.4695	0.680502	0.0313917	0.0673271	0.183978
VAL	62	62	9	R3	1	E12	35 FP3	1.89555	1.92418	1.90102	1.75903	1.91814	3.03e-06	9.46e-07	1.54e-06	1.15e-07	6.43e-07	1.69e-06		1.79099	0.558349	0.909703	0.0681312	0.379589	1.26262	0.792003	1.18778	0.0608761	0.224401	1.41847	0.704984	0.765884	1.11918	1.69157
FVEF	62	62	9	R3	1	D12	35 FP3	1.89555	1.92418	1.90102	1.75903	1.91814	1.01e-06	5.07e-07	2.76e-07	1.44e-08	1.61e-07	7.15e-07		1.40874	0.709855	0.386038	0.0201731	0.224789	1.26262	0.792003	1.18778	0.0608761	0.224401	1.11572	0.896278	0.325007	0.331379	1.00173
NIL2	62	62	9	R3	1	E10	35 FP3	1.89555	1.92418	1.90102	1.75903	1.91814	3.75e-06	6.96e-07	1.02e-06	6.69e-08	2.7e-07	1.62e-06		2.32218	0.430631	0.629679	0.0413851	0.166776	1.26262	0.792003	1.18778	0.0608761	0.224401	1.83917	0.543723	0.53013	0.679825	0.743204
VAR	62	62	9	R3	1	E9	35 FP3	1.89555	1.92418	1.90102	1.75903	1.91814	3.17e-06	7.36e-07	2.58e-06	1.86e-07	1.57e-07	1.53e-06		2.07558	0.481792	1.6905	0.122009	0.102492	1.26262	0.792003	1.18778	0.0608761	0.224401	1.64387	0.608321	1.42324	2.00421	0.456735
LHP	62	62	9	R3	1	G10	35 FP3	1.89555	1.92418	1.90102	1.75903	1.91814	2.63e-06	5.49e-07	2.65e-07	9.89e-09	2.13e-07	1.2e-06		2.18743	0.457157	0.220564	0.00823352	0.17711	1.26262	0.792003	1.18778	0.0608761	0.224401	1.73245	0.577216	0.185694	0.135251	0.789256
EDIN	62	62	9	R3	1	B9	35 FP3	1.89555	1.92418	1.90102	1.75903	1.91814	3.75e-06	7.46e-07	6.73e-07	3.46e-08	3.48e-07	1.67e-06		2.24075	0.446279	0.402153	0.0206905	0.208095	1.26262	0.792003	1.18778	0.0608761	0.224401	1.77468	0.563481	0.338575	0.339879	0.927336
NIL1	62	62	9	R3	1	B10	35 FP3	1.89555	1.92418	1.90102	1.75903	1.91814	2.83e-06	4.42e-07	5.51e-07	3.21e-08	1.86e-07	1.12e-06		2.53182	0.394973	0.492718	0.0286612	0.166218	1.26262	0.792003	1.18778	0.0608761	0.224401	2.00521	0.498702	0.414822	0.470811	0.740719
FCAF	62	62	9	R3	1	B12	35 FP3	1.89555	1.92418	1.90102	1.75903	1.91814	2.24e-06	9.85e-07	7.4e-07	4.65e-08	2.43e-07	1.49e-06		1.50925	0.662583	0.498081	0.0312823	0.163411	1.26262	0.792003	1.18778	0.0608761	0.224401	1.19533	0.836591	0.419337	0.513869	0.728208
VARN	62	62	9	R3	1	D9	35 FP3	1.89555	1.92418	1.90102	1.75903	1.91814	4.69e-06	5.98e-07	1.61e-06	7.2e-08	3.09e-07	1.68e-06		2.80121	0.356989	0.961007	0.042993	0.184503	1.26262	0.792003	1.18778	0.0608761	0.224401	2.21856	0.450742	0.809077	0.706238	0.822203
BRON	62	62	9	R3	1	D10	35 FP3	1.89555	1.92418	1.90102	1.75903	1.91814	4.05e-06	7.82e-07	1.15e-06	3.49e-08	2.34e-07	1.78e-06		2.27527	0.439509	0.645379	0.0195979	0.131433	1.26262	0.792003	1.18778	0.0608761	0.224401	1.80202	0.554933	0.543348	0.321931	0.585707
NDX	62	62	9	R3	1	H10	35 FP3	1.89555	1.92418	1.90102	1.75903	1.91814	2.02e-06	6.41e-07	2.36e-07	8.71e-09	3.42e-07	1.14e-06		1.7753	0.563287	0.207835	0.00765109	0.300438	1.26262	0.792003	1.18778	0.0608761	0.224401	1.40604	0.711218	0.174978	0.125683	1.33885
VIN3	62	62	9	R2	1	E5	33 FP2	1.88744	1.89703	1.88544	1.76435	1.8921	2.39e-06	1.27e-06	1.93e-06	6.46e-08	0	1.75e-06		1.36982	0.730025	1.10604	0.0370054	0	1.08718	0.919807	1.11077	0.0529241	0.238933	1.25997	0.793672	0.99574	0.699216	0
SF2	62	62	9	R1	1	C1	34 FP1	1.903	1.911	1.893	1.689	1.888	1.79e-06	5.4e-07	4.06e-07	8.22e-08	2.11e-07	9.83e-07		1.82066	0.549253	0.412765	0.083621	0.215162	1.16031	0.861841	1.28799	0.232944	0.345792	1.56911	0.637302	0.320473	0.358974	0.62223
VIN3	62	62	9	R1	1	G4	34 FP1	1.903	1.911	1.893	1.689	1.888	1.89e-06	5.01e-07	6.17e-07	6.18e-08	7.53e-10	9.72e-07		1.94098	0.515204	0.634418	0.0636234	0.000774749	1.16031	0.861841	1.28799	0.232944	0.345792	1.67281	0.597795	0.492565	0.273127	0.0022405
VIN3	62	62	9	R3	1	F12	35 FP3	1.89555	1.92418	1.90102	1.75903	1.91814	2.05e-06	6.87e-07	5.45e-07	2.44e-08	6.22e-10	1.19e-06		1.72785	0.578754	0.459333	0.0205493	0.000524267	1.26262	0.792003	1.18778	0.0608761	0.224401	1.36846	0.730748	0.386715	0.33756	0.0023363
SF2	62	62	9	R3	1	C9	35 FP3	1.89555	1.92418	1.90102	1.75903	1.91814	3.51e-06	4.94e-07	3.31e-07	1.57e-08	1.57e-07	1.32e-06		2.66456	0.375297	0.251513	0.0119036	0.119666	1.26262	0.792003	1.18778	0.0608761	0.224401	2.11034	0.473858	0.21175	0.195539	0.533267
SF2	62	62	9	R3	2	C6	36 FP2	1.89566	1.91169	1.90336	1.75501	1.90065	1.65e-06	5.46e-07	3.92e-07	1.91e-08	2.57e-07	9.49e-07		1.73788	0.575413	0.413301	0.0201065	0.270437	1.17014	0.854596	1.08703	0.066668	0.266043	1.48519	0.673315	0.380212	0.301591	1.01652
SF2	62	62	9	R1	2	F7	38 FP2	1.89805	1.90838	1.88331	1.68335	1.88649	1.73e-06	6.21e-07	3.71e-07	8.54e-08	3.29e-07	1.04e-06		1.66896	0.599174	0.357967	0.0824161	0.31785	1.19284	0.838337	1.48887	0.195186	0.327899	1.39915	0.714718	0.240428	0.422243	0.969353
VIN3	62	62	9	R3	2	G6	36 FP2	1.89566	1.91169	1.90336	1.75501	1.90065	1.72e-06	9.1e-07	1.01e-06	5.88e-08	1.24e-09	1.25e-06		1.37575	0.726876	0.80939	0.0469572	0.000989297	1.17014	0.854596	1.08703	0.066668	0.266043	1.17571	0.850549	0.74459	0.704344	0.00371857
VIN3	62	62	9	R1	2	H8	38 FP2	1.89805	1.90838	1.88331	1.68335	1.88649	6.19e-06	1.25e-06	2.51e-06	2.91e-07	2.82e-09	2.78e-06		2.22288	0.449867	0.902704	0.104637	0.00101401	1.19284	0.838337	1.48887	0.195186	0.327899	1.86352	0.536618	0.606299	0.536087	0.00309244
SF2	62	62	9	R2	2	F6	40 FP2	1.88716	1.87328	1.87762	1.72247	1.86897	2.21e-06	1.21e-06	9.27e-07	2.81e-07	3.21e-07	1.63e-06		1.35179	0.739759	0.567352	0.171797	0.19628	1.06194	0.941669	1.43055	0.0789058	0.233659	1.27294	0.785583	0.396598	2.17724	0.840027
VIN3	62	62	9	R2	2	H8	40 FP2	1.88716	1.87328	1.87762	1.72247	1.86897	3.58e-06	1.12e-06	1.61e-06	8.62e-08	1.3e-09	2e-06		1.79036	0.558547	0.805069	0.0430855	0.00065007	1.06194	0.941669	1.43055	0.0789058	0.233659	1.68592	0.593147	0.56277	0.546037	0.00278213
SF2	69	69	10	R1	2	D11	37 FP3	1.89376	1.89035	1.87733	1.7121	1.85846	3.06e-06	7.72e-07	4.96e-07	1.33e-07	9.26e-07	1.54e-06		1.9918	0.502059	0.322401	0.0865804	0.601823	1.15903	0.862792	1.24862	0.11741	0.37378	1.71851	0.5819	0.258205	0.737418	1.6101
VIN3	69	69	10	R1	2	C11	37 FP3	1.89376	1.89035	1.87733	1.7121	1.85846	2.21e-06	5.63e-07	7.14e-07	5.36e-08	7.08e-09	1.12e-06		1.98258	0.504392	0.640306	0.0480739	0.00634492	1.15903	0.862792	1.24862	0.11741	0.37378	1.71056	0.584605	0.512809	0.409453	0.016975
SF2	69	69	10	R2	1	C3	42 FP1	1.90308	1.88404	1.88973	1.70096	1.849	1.79e-06	4.16e-07	2.27e-07	2.22e-08	3.29e-07	8.64e-07		2.07604	0.481686	0.262477	0.0256753	0.380955	1.03003	0.970847	1.29221	0.126543	0.347439	2.01552	0.49615	0.203124	0.202898	1.09647
VIN3	69	69	10	R3	2	E1	42 FP1	1.90308	1.88404	1.88973	1.70096	1.849	1.34e-06	4.66e-07	4.95e-07	3.61e-08	1.12e-09	7.91e-07		1.6992	0.588514	0.624962	0.0455618	0.00141513	1.03003	0.970847	1.29221	0.126543	0.347439	1.64966	0.606186	0.48364	0.360051	0.00407304
SF2	69	69	10	R3	2	D1	42 FP1	1.90308	1.88404	1.88973	1.70096	1.849	1.28e-06	3.99e-07	1.81e-07	1e-08	2.19e-07	7.16e-07		1.79335	0.557616	0.252593	0.0139905	0.305856	1.03003	0.970847	1.29221	0.126543	0.347439	1.74107	0.57436	0.195475	0.11056	0.880316
VIN3	69	69	10	R2	1	E3	42 FP1	1.90308	1.88404	1.88973	1.70096	1.849	2.09e-06	3.89e-07	6.81e-07	4.15e-08	1.26e-09	9.02e-07		2.31686	0.431619	0.755463	0.0459577	0.00140007	1.03003	0.970847	1.29221	0.126543	0.347439	2.24931	0.44458	0.584631	0.36318	0.00402968
NIL1	62	62	9	R3	2	H8	36 FP2	1.89566	1.91169	1.90336	1.75501	1.90065	1.62e-06	5.67e-07	8.17e-07	3.01e-08	1.63e-07	9.57e-07		1.68891	0.592099	0.853476	0.0314787	0.169859	1.17014	0.854596	1.08703	0.066668	0.266043	1.44333	0.692841	0.785146	0.472171	0.638465
VAL	62	62	9	R3	2	H6	36 FP2	1.89566	1.91169	1.90336	1.75501	1.90065	1.53e-06	7.03e-07	9.69e-07	6.14e-08	6.11e-07	1.04e-06		1.47508	0.677928	0.934883	0.0592216	0.590002	1.17014	0.854596	1.08703	0.066668	0.266043	1.2606	0.793273	0.860036	0.888307	2.2177
LOV	62	62	9	R3	2	E5	36 FP2	1.89566	1.91169	1.90336	1.75501	1.90065	3.24e-06	7.99e-07	1.02e-06	9.11e-08	7.25e-07	1.61e-06		2.01376	0.496584	0.63451	0.0566629	0.450693	1.17014	0.854596	1.08703	0.066668	0.266043	1.72095	0.581074	0.583711	0.849926	1.69407
LHP	62	62	9	R3	2	D6	36 FP2	1.89566	1.91169	1.90336	1.75501	1.90065	1.99e-06	5.85e-07	4.25e-07	3.98e-08	4.75e-07	1.08e-06		1.84402	0.542293	0.393931	0.0369363	0.440187	1.17014	0.854596	1.08703	0.066668	0.266043	1.57589	0.63456	0.362393	0.554033	1.65457
FLDF	62	62	9	R3	2	E7	36 FP2	1.89566	1.91169	1.90336	1.75501	1.90065	1.41e-06	8.98e-07	4.39e-07	3.67e-08	3.79e-07	1.13e-06		1.25276	0.798239	0.390006	0.0325951	0.337281	1.17014	0.854596	1.08703	0.066668	0.266043	1.0706	0.934054	0.358782	0.488916	1.26777
NIL2	62	62	9	R3	2	E6	36 FP2	1.89566	1.91169	1.90336	1.75501	1.90065	1.52e-06	7.34e-07	6.93e-07	4.1e-08	3.11e-07	1.06e-06		1.4378	0.695506	0.656399	0.0388154	0.294229	1.17014	0.854596	1.08703	0.066668	0.266043	1.22874	0.813842	0.603847	0.58222	1.10595
SDG8	62	62	9	R3	2	F5	36 FP2	1.89566	1.91169	1.90336	1.75501	1.90065	2.73e-06	8.44e-07	1.44e-08	0	1.08e-07	1.52e-06		1.79873	0.555947	0.00948378	0	0.0713819	1.17014	0.854596	1.08703	0.066668	0.266043	1.53719	0.650538	0.0087245	0	0.26831
FCAF	62	62	9	R3	2	D5	36 FP2	1.89566	1.91169	1.90336	1.75501	1.90065	2.33e-06	6.48e-07	3.67e-07	3.2e-08	2.81e-07	1.23e-06		1.89679	0.527207	0.298154	0.0259965	0.228448	1.17014	0.854596	1.08703	0.066668	0.266043	1.62099	0.616907	0.274284	0.389939	0.858689
NDX	62	62	9	R3	2	C8	36 FP2	1.89566	1.91169	1.90336	1.75501	1.90065	2.32e-06	1.15e-06	3.8e-07	2.7e-08	1.13e-06	1.64e-06		1.41665	0.705891	0.232499	0.0165156	0.693473	1.17014	0.854596	1.08703	0.066668	0.266043	1.21066	0.825993	0.213885	0.24773	2.60662
BRON	62	62	9	R3	2	E8	36 FP2	1.89566	1.91169	1.90336	1.75501	1.90065	2.9e-06	1.64e-06	1.86e-06	1.33e-07	5.21e-07	2.18e-06		1.33057	0.751557	0.855977	0.0609956	0.239358	1.17014	0.854596	1.08703	0.066668	0.266043	1.1371	0.879429	0.787447	0.914917	0.899697
VIN3-1	62	62	9	R3	2	D7	36 FP2	1.89566	1.91169	1.90336	1.75501	1.90065	2.03e-06	8.44e-07	1.16e-06	1.04e-07	8.33e-10	1.31e-06		1.55157	0.644508	0.887139	0.0793343	0.000636158	1.17014	0.854596	1.08703	0.066668	0.266043	1.32597	0.754166	0.816114	1.18999	0.00239119
VRN2	62	62	9	R3	2	F6	36 FP2	1.89566	1.91169	1.90336	1.75501	1.90065	1.94e-06	9.46e-07	1.89e-06	7.91e-08	3.1e-07	1.35e-06		1.43223	0.69821	1.39425	0.0584377	0.228727	1.17014	0.854596	1.08703	0.066668	0.266043	1.22398	0.817006	1.28262	0.876549	0.859739
EDIN	62	62	9	R3	2	B5	036 FP2	1.89566	1.91169	1.90336	1.75501	1.90065	2.28e-06	9.97e-07	1.9e-06	1.32e-07	2.99e-07	1.51e-06		1.51175	0.661487	1.25988	0.0874836	0.198593	1.17014	0.854596	1.08703	0.066668	0.266043	1.29193	0.774035	1.15901	1.31223	0.746472
EDI	62	62	9	R3	2	G7	36 FP2	1.89566	1.91169	1.90336	1.75501	1.90065	1.95e-06	1.15e-06	8.38e-07	4.52e-08	4.08e-07	1.5e-06		1.30213	0.767975	0.558959	0.0301729	0.272394	1.17014	0.854596	1.08703	0.066668	0.266043	1.11279	0.898641	0.514208	0.452585	1.02388
VARN	62	62	9	R3	2	H5	36 FP2	1.89566	1.91169	1.90336	1.75501	1.90065	2.54e-06	1.01e-06	1.43e-06	5.67e-08	4.05e-07	1.61e-06		1.58395	0.631334	0.888072	0.0353156	0.252353	1.17014	0.854596	1.08703	0.066668	0.266043	1.35364	0.738752	0.816973	0.529724	0.948543
COL	62	62	9	R3	2	C5	036 FP2	1.89566	1.91169	1.90336	1.75501	1.90065	2e-06	7.18e-07	6.24e-09	1.4e-09	2.51e-07	1.2e-06		1.66896	0.599177	0.00520451	0.00116402	0.209321	1.17014	0.854596	1.08703	0.066668	0.266043	1.42628	0.701123	0.00478784	0.01746	0.786797
BRO	62	62	9	R3	2	B7	036 FP2	1.89566	1.91169	1.90336	1.75501	1.90065	1.75e-06	5.02e-07	9.61e-07	6.43e-08	3.57e-07	9.38e-07		1.86898	0.535051	1.02365	0.0685296	0.379965	1.17014	0.854596	1.08703	0.066668	0.266043	1.59722	0.626087	0.941696	1.02792	1.42821
FVEF	62	62	9	R3	2	F8	36 FP2	1.89566	1.91169	1.90336	1.75501	1.90065	1.13e-06	7.9e-07	4.42e-07	2.04e-08	2.45e-07	9.45e-07		1.19594	0.836163	0.467232	0.021568	0.259562	1.17014	0.854596	1.08703	0.066668	0.266043	1.02204	0.978431	0.429825	0.323514	0.975641
ULL	62	62	9	R3	2	G8	36 FP2	1.89566	1.91169	1.90336	1.75501	1.90065	2.09e-06	7.75e-07	1.08e-06	9.29e-08	2.2e-07	1.27e-06		1.64113	0.609337	0.849748	0.0729998	0.173166	1.17014	0.854596	1.08703	0.066668	0.266043	1.4025	0.713012	0.781717	1.09498	0.650895
VAR	62	62	9	R3	2	B6	036 FP2	1.89566	1.91169	1.90336	1.75501	1.90065	2.42e-06	1.19e-06	6.71e-07	3.85e-08	6.61e-07	1.7e-06		1.42577	0.701376	0.395131	0.0226672	0.389152	1.17014	0.854596	1.08703	0.066668	0.266043	1.21846	0.82071	0.363497	0.340001	1.46274
ULLN	62	62	9	R3	2	H7	36 FP2	1.89566	1.91169	1.90336	1.75501	1.90065	1.82e-06	1.1e-06	9.07e-07	5.27e-08	4.51e-07	1.42e-06		1.28756	0.776664	0.640869	0.0372324	0.318365	1.17014	0.854596	1.08703	0.066668	0.266043	1.10034	0.908808	0.589561	0.558475	1.19667
VRN5	62	62	9	R3	2	D8	36 FP2	1.89566	1.91169	1.90336	1.75501	1.90065	2.85e-06	2.05e-06	2.75e-06	2.29e-07	7.49e-07	2.42e-06		1.17887	0.848269	1.13691	0.0945884	0.309775	1.17014	0.854596	1.08703	0.066668	0.266043	1.00746	0.992596	1.04589	1.4188	1.16438
VRN2	62	62	9	R1	2	H5	38 FP2	1.89805	1.90838	1.88331	1.68335	1.88649	6.21e-06	1.62e-06	5.42e-06	7.95e-07	1.27e-06	3.17e-06		1.95949	0.510337	1.70983	0.25076	0.400562	1.19284	0.838337	1.48887	0.195186	0.327899	1.64271	0.608749	1.14841	1.28472	1.2216
EDI	62	62	9	R1	2	C6	38 FP2	1.89805	1.90838	1.88331	1.68335	1.88649	1.85e-06	2.63e-07	2.46e-07	5.74e-08	2.57e-07	6.97e-07		2.65472	0.376687	0.352974	0.0822862	0.368655	1.19284	0.838337	1.48887	0.195186	0.327899	2.22555	0.449327	0.237075	0.421578	1.1243
LHP	62	62	9	R1	2	B6	38 FP2	1.89805	1.90838	1.88331	1.68335	1.88649	1.39e-06	2.45e-07	1.2e-07	1.68e-08	1.43e-07	5.83e-07		2.38176	0.419858	0.206055	0.0288682	0.244835	1.19284	0.838337	1.48887	0.195186	0.327899	1.99672	0.500822	0.138396	0.147901	0.746678
BRON	62	62	9	R1	2	C7	38 FP2	1.89805	1.90838	1.88331	1.68335	1.88649	1.18e-06	2.6e-07	3.69e-07	4.8e-08	1.56e-07	5.54e-07		2.13233	0.468972	0.665773	0.086693	0.281628	1.19284	0.838337	1.48887	0.195186	0.327899	1.78761	0.559407	0.447165	0.444155	0.858886
VRN5	62	62	9	R1	2	E5	38 FP2	1.89805	1.90838	1.88331	1.68335	1.88649	1.96e-06	4.75e-07	1.11e-06	2.31e-07	3.03e-07	9.65e-07		2.03013	0.492579	1.15429	0.238928	0.314154	1.19284	0.838337	1.48887	0.195186	0.327899	1.70193	0.587567	0.775275	1.2241	0.958081
FCAF	62	62	9	R1	2	D6	38 FP2	1.89805	1.90838	1.88331	1.68335	1.88649	1.08e-06	2.91e-07	2.14e-07	4.9e-08	1.49e-07	5.61e-07		1.92881	0.518453	0.381466	0.0873876	0.265055	1.19284	0.838337	1.48887	0.195186	0.327899	1.617	0.618431	0.256211	0.447714	0.808344
LOV	62	62	9	R1	2	C8	38 FP2	1.89805	1.90838	1.88331	1.68335	1.88649	2.79e-06	4.75e-07	7.57e-07	1.25e-07	4.82e-07	1.15e-06		2.42417	0.412512	0.658222	0.108829	0.419109	1.19284	0.838337	1.48887	0.195186	0.327899	2.03227	0.49206	0.442094	0.557567	1.27816
FVEF	62	62	9	R1	2	H7	38 FP2	1.89805	1.90838	1.88331	1.68335	1.88649	7.95e-06	3.24e-06	2.97e-06	2.64e-07	1.77e-06	5.08e-06		1.56546	0.638791	0.584618	0.0519541	0.348136	1.19284	0.838337	1.48887	0.195186	0.327899	1.31238	0.761975	0.392658	0.266177	1.06172
NDX	62	62	9	R1	2	D5	38 FP2	1.89805	1.90838	1.88331	1.68335	1.88649	1.99e-06	3.37e-07	1.66e-07	1.71e-08	4.72e-07	8.2e-07		2.43317	0.410987	0.20278	0.0208248	0.575608	1.19284	0.838337	1.48887	0.195186	0.327899	2.03981	0.490241	0.136197	0.106692	1.75544
BRO	62	62	9	R1	2	C5	38 FP2	1.89805	1.90838	1.88331	1.68335	1.88649	1.26e-06	1.77e-07	3.46e-07	4.5e-08	1.8e-07	4.73e-07		2.66866	0.374719	0.732594	0.0951518	0.381102	1.19284	0.838337	1.48887	0.195186	0.327899	2.23724	0.446979	0.492045	0.487493	1.16226
NIL1	62	62	9	R1	2	B5	38 FP2	1.89805	1.90838	1.88331	1.68335	1.88649	8.86e-07	1.89e-07	4.17e-07	6.23e-08	1.48e-07	4.09e-07		2.16423	0.462059	1.018	0.152263	0.362326	1.19284	0.838337	1.48887	0.195186	0.327899	1.81435	0.551162	0.683739	0.780092	1.10499
COL	62	62	9	R1	2	B8	38 FP2	1.89805	1.90838	1.88331	1.68335	1.88649	5.95e-06	2.05e-06	1.14e-08	1.25e-09	7.36e-07	3.49e-06		1.70484	0.586567	0.00327351	0.000359134	0.210774	1.19284	0.838337	1.48887	0.195186	0.327899	1.42923	0.69968	0.00219865	0.00183995	0.642802
ULL	62	62	9	R1	2	E6	38 FP2	1.89805	1.90838	1.88331	1.68335	1.88649	1.93e-06	3.54e-07	9.14e-07	1.23e-07	1.91e-07	8.28e-07		2.33602	0.428079	1.10434	0.149046	0.230264	1.19284	0.838337	1.48887	0.195186	0.327899	1.95837	0.510629	0.741726	0.763609	0.702242
EDIN	62	62	9	R1	2	D7	38 FP2	1.89805	1.90838	1.88331	1.68335	1.88649	1.04e-06	3.77e-07	2.51e-07	4.24e-08	1.72e-07	6.28e-07		1.66385	0.601015	0.400122	0.0675471	0.274064	1.19284	0.838337	1.48887	0.195186	0.327899	1.39487	0.716914	0.268741	0.346065	0.835818
FLDF	62	62	9	R1	2	G7	38 FP2	1.89805	1.90838	1.88331	1.68335	1.88649	7.64e-07	2.37e-07	1.31e-07	3.19e-08	1.22e-07	4.26e-07		1.79323	0.557653	0.307447	0.0748687	0.285435	1.19284	0.838337	1.48887	0.195186	0.327899	1.50333	0.66519	0.206496	0.383576	0.870496
SF2	69	69	10	R3	1	H3	42 FP1	1.90308	1.88404	1.88973	1.70096	1.849	3.58e-06	6.96e-07	2.63e-07	3.22e-08	5.85e-07	1.58e-06		2.26834	0.44085	0.16662	0.0203841	0.370349	1.03003	0.970847	1.29221	0.126543	0.347439	2.20221	0.454088	0.128942	0.161085	1.06594
VARN	62	62	9	R1	2	F6	38 FP2	1.89805	1.90838	1.88331	1.68335	1.88649	1.51e-06	4.99e-07	1.22e-06	1.16e-07	2.37e-07	8.68e-07		1.74069	0.574483	1.40847	0.133802	0.27336	1.19284	0.838337	1.48887	0.195186	0.327899	1.45929	0.685266	0.945994	0.685512	0.83367
VAL	62	62	9	R1	2	H6	38 FP2	1.89805	1.90838	1.88331	1.68335	1.88649	1.65e-06	4.42e-07	1.05e-06	1.87e-07	5.09e-07	8.55e-07		1.93584	0.516572	1.23092	0.219305	0.595248	1.19284	0.838337	1.48887	0.195186	0.327899	1.62288	0.616187	0.826743	1.12357	1.81534
VIN3-1	62	62	9	R1	2	E8	38 FP2	1.89805	1.90838	1.88331	1.68335	1.88649	2.23e-06	4.62e-07	8.57e-07	1.37e-07	0	1.02e-06		2.19959	0.454631	0.843764	0.134641	0	1.19284	0.838337	1.48887	0.195186	0.327899	1.84399	0.542301	0.566712	0.68981	0
SDG8	62	62	9	R1	2	B7	38 FP2	1.89805	1.90838	1.88331	1.68335	1.88649	1.39e-06	5.76e-07	3.05e-08	5.19e-09	4.32e-08	8.97e-07		1.55582	0.642747	0.0340281	0.00578869	0.0481628	1.19284	0.838337	1.48887	0.195186	0.327899	1.3043	0.766693	0.0228549	0.0296573	0.146883
VAR	62	62	9	R1	2	D8	38 FP2	1.89805	1.90838	1.88331	1.68335	1.88649	3.38e-06	7.19e-07	1.88e-06	3.68e-07	2.17e-07	1.56e-06		2.16875	0.461094	1.20523	0.236012	0.13905	1.19284	0.838337	1.48887	0.195186	0.327899	1.81814	0.550011	0.809493	1.20916	0.424064
SF2	69	69	10	R2	2	H4	43 FP1	1.90691	1.88404	1.88879	1.70696	1.85024	6.22e-07	4.44e-07	3.59e-07	9.31e-09	2.72e-07	5.26e-07		1.18419	0.844462	0.682388	0.0177092	0.517752	1.22907	0.813622	1.60415	0.120469	0.387149	0.963479	1.0379	0.42539	0.147002	1.33735
VIN3	69	69	10	R2	2	G4	43 FP1	1.90691	1.88404	1.88879	1.70696	1.85024	4.22e-06	2.55e-06	3.57e-06	1.4e-07	9.56e-09	3.28e-06		1.28701	0.776996	1.08901	0.0426207	0.00291382	1.22907	0.813622	1.60415	0.120469	0.387149	1.04714	0.954984	0.678869	0.353789	0.00752635
SF2	76	76	11	R3	1	B7	34 FP2	1.887	1.906	1.887	1.758	1.884	2.47e-06	1.27e-06	7.31e-07	2.18e-08	1.18e-06	1.77e-06		1.39358	0.717574	0.412905	0.0123228	0.663533	1.11716	0.895131	1.21766	0.0518166	0.32288	1.24744	0.801642	0.339096	0.237815	2.05505
SF2	76	76	11	R2	1	B10	38 FP3	1.88424	1.88371	1.87288	1.74371	1.8741	2.85e-06	5.67e-07	2.46e-07	5.97e-09	9e-07	1.27e-06		2.24242	0.445946	0.193685	0.0046926	0.707422	1.04674	0.955347	1.28768	0.0438876	0.312099	2.14229	0.466789	0.150413	0.106923	2.26666
SF2	76	76	11	R3	2	C10	38 FP3	1.88424	1.88371	1.87288	1.74371	1.8741	4.21e-06	1.03e-06	5.49e-07	1.38e-08	9.87e-07	2.08e-06		2.02061	0.494901	0.263252	0.00660187	0.473779	1.04674	0.955347	1.28768	0.0438876	0.312099	1.93038	0.518033	0.204439	0.150427	1.51804
SF2	76	76	11	R1	1	C1	41 FP1	1.89023	1.88812	1.9013	1.73901	1.84621	3.74e-06	8.13e-07	2.98e-07	1e-08	1.36e-06	1.74e-06		2.14376	0.46647	0.171063	0.00574737	0.778066	1.0889	0.918361	1.1708	0.0588638	0.323463	1.96875	0.507937	0.146108	0.0976384	2.40543
VIN3	76	76	11	R3	1	B6	34 FP2	1.887	1.906	1.887	1.758	1.884	4.42e-06	9.42e-07	1.99e-06	7.33e-08	5.17e-09	2.04e-06		2.16585	0.461713	0.976255	0.0359382	0.00253371	1.11716	0.895131	1.21766	0.0518166	0.32288	1.93872	0.515805	0.801745	0.693565	0.00784723
VIN3	76	76	11	R2	1	B9	38 FP3	1.88424	1.88371	1.87288	1.74371	1.8741	2.88e-06	8.43e-07	1.29e-06	2.96e-08	4.93e-09	1.56e-06		1.84878	0.540897	0.830678	0.0189844	0.00316555	1.04674	0.955347	1.28768	0.0438876	0.312099	1.76623	0.566179	0.645095	0.432569	0.0101428
VIN3	76	76	11	R3	2	E10	38 FP3	1.88424	1.88371	1.87288	1.74371	1.8741	1.34e-06	3.26e-07	4.13e-07	9.43e-09	1.88e-09	6.61e-07		2.02647	0.49347	0.625854	0.0142667	0.00284036	1.04674	0.955347	1.28768	0.0438876	0.312099	1.93598	0.516535	0.486031	0.325074	0.00910085
VIN3	76	76	11	R1	1	E1	41 FP1	1.89023	1.88812	1.9013	1.73901	1.84621	2.28e-06	1.08e-06	1.27e-06	5.64e-08	7.95e-09	1.57e-06		1.45735	0.686177	0.809138	0.0360073	0.00507276	1.0889	0.918361	1.1708	0.0588638	0.323463	1.33837	0.747176	0.6911	0.611704	0.0156827
VIN3	76	76	11	R2	2	D4	43 FP1	1.90691	1.88404	1.88879	1.70696	1.85024	2.25e-06	9.86e-07	1.77e-06	7.18e-08	4e-09	1.49e-06		1.51051	0.662028	1.19035	0.0481695	0.00268435	1.22907	0.813622	1.60415	0.120469	0.387149	1.22898	0.81368	0.742042	0.399849	0.00693363
SF2	76	76	11	R2	2	E4	43 FP1	1.90691	1.88404	1.88879	1.70696	1.85024	5.39e-06	2e-06	1.23e-06	3.58e-08	1.93e-06	3.28e-06		1.64166	0.60914	0.374939	0.0109145	0.586907	1.22907	0.813622	1.60415	0.120469	0.387149	1.33569	0.748676	0.233731	0.0905997	1.51597
SF2	76	76	11	R1	2	F1	43 FP1	1.90691	1.88404	1.88879	1.70696	1.85024	2.29e-06	9.68e-07	6.25e-07	2.19e-08	1.37e-06	1.49e-06		1.53769	0.650326	0.420229	0.0147434	0.923406	1.22907	0.813622	1.60415	0.120469	0.387149	1.2511	0.799297	0.261964	0.122383	2.38514
VIN3	76	76	11	R1	2	G1	43 FP1	1.90691	1.88404	1.88879	1.70696	1.85024	2.43e-06	9.23e-07	1.23e-06	5.02e-08	4.76e-09	1.5e-06		1.62112	0.616858	0.822392	0.0335662	0.00318279	1.22907	0.813622	1.60415	0.120469	0.387149	1.31898	0.758163	0.512666	0.278629	0.00822109
COL	62	62	9	R2	2	B8	40 FP2	1.88716	1.87328	1.87762	1.72247	1.86897	2.08e-06	8.43e-07	5.83e-09	0	2.11e-07	1.32e-06		1.56965	0.637086	0.0044072	0	0.159534	1.06194	0.941669	1.43055	0.0789058	0.233659	1.47809	0.676551	0.00308078	0	0.682764
FVEF	62	62	9	R2	2	F8	40 FP2	1.88716	1.87328	1.87762	1.72247	1.86897	3.26e-06	1.31e-06	1.38e-06	6.92e-08	6.47e-07	2.06e-06		1.5765	0.634316	0.669076	0.033514	0.313172	1.06194	0.941669	1.43055	0.0789058	0.233659	1.48454	0.673608	0.467706	0.424734	1.34029
VAR	62	62	9	R2	2	C7	40 FP2	1.88716	1.87328	1.87762	1.72247	1.86897	1.7e-06	1.21e-06	3.89e-06	2.99e-07	1.25e-07	1.43e-06		1.1854	0.843596	2.71286	0.20841	0.0875321	1.06194	0.941669	1.43055	0.0789058	0.233659	1.11625	0.895853	1.89638	2.64125	0.374614
NIL2	62	62	9	R2	2	H5	40 FP2	1.88716	1.87328	1.87762	1.72247	1.86897	4.51e-06	1.3e-06	2.09e-06	1.11e-07	1.04e-06	2.42e-06		1.86128	0.537265	0.860813	0.0457633	0.427354	1.06194	0.941669	1.43055	0.0789058	0.233659	1.75271	0.570546	0.601736	0.579974	1.82896
VAL	62	62	9	R2	2	E7	40 FP2	1.88716	1.87328	1.87762	1.72247	1.86897	2.38e-06	1.02e-06	2.12e-06	1.82e-07	6.61e-07	1.56e-06		1.52328	0.656478	1.36182	0.116781	0.424162	1.06194	0.941669	1.43055	0.0789058	0.233659	1.43442	0.697144	0.951956	1.48001	1.8153
BRON	62	62	9	R2	2	G7	40 FP2	1.88716	1.87328	1.87762	1.72247	1.86897	3.28e-06	1.12e-06	1.77e-06	8.57e-08	4e-07	1.91e-06		1.71519	0.583026	0.925909	0.0447756	0.209148	1.06194	0.941669	1.43055	0.0789058	0.233659	1.61514	0.619142	0.647241	0.567457	0.895098
LOV	62	62	9	R2	2	F5	40 FP2	1.88716	1.87328	1.87762	1.72247	1.86897	3.67e-06	7.54e-07	1.86e-06	1.36e-07	7.73e-07	1.66e-06		2.20564	0.453382	1.1185	0.0817695	0.464956	1.06194	0.941669	1.43055	0.0789058	0.233659	2.07699	0.481467	0.781871	1.03629	1.98989
VRN5	62	62	9	R2	2	D7	40 FP2	1.88716	1.87328	1.87762	1.72247	1.86897	2.17e-06	1.18e-06	2.88e-06	2.14e-07	3.79e-07	1.6e-06		1.3551	0.73795	1.80295	0.133972	0.237332	1.06194	0.941669	1.43055	0.0789058	0.233659	1.27606	0.783663	1.26032	1.69787	1.01572
FCAF	62	62	9	R2	2	E8	40 FP2	1.88716	1.87328	1.87762	1.72247	1.86897	1.89e-06	8.95e-07	8.44e-07	4.66e-08	2.83e-07	1.3e-06		1.45358	0.687955	0.648634	0.0357891	0.217542	1.06194	0.941669	1.43055	0.0789058	0.233659	1.36879	0.73057	0.453417	0.453568	0.931022
NIL1	62	62	9	R2	2	B5	40 FP2	1.88716	1.87328	1.87762	1.72247	1.86897	2.26e-06	4.44e-07	1.27e-06	8.53e-08	3.14e-07	1e-06		2.25412	0.443633	1.27012	0.0851264	0.313404	1.06194	0.941669	1.43055	0.0789058	0.233659	2.12263	0.471114	0.887853	1.07884	1.34128
VARN	62	62	9	R2	2	C8	40 FP2	1.88716	1.87328	1.87762	1.72247	1.86897	2.04e-06	7.82e-07	1.81e-06	5.64e-08	2.43e-07	1.26e-06		1.61399	0.619583	1.42991	0.0446871	0.192334	1.06194	0.941669	1.43055	0.0789058	0.233659	1.51984	0.657963	0.999554	0.566335	0.823139
NDX	62	62	9	R2	2	G5	40 FP2	1.88716	1.87328	1.87762	1.72247	1.86897	6.6e-06	1.59e-06	1.03e-06	7.79e-08	3.1e-06	3.24e-06		2.04013	0.490165	0.318104	0.0240779	0.957556	1.06194	0.941669	1.43055	0.0789058	0.233659	1.92112	0.520528	0.222365	0.305147	4.09808
ULLN	62	62	9	R2	2	F7	40 FP2	1.88716	1.87328	1.87762	1.72247	1.86897	3.27e-06	1.02e-06	1.59e-06	1.04e-07	4.91e-07	1.82e-06		1.79432	0.557315	0.87033	0.0571729	0.269562	1.06194	0.941669	1.43055	0.0789058	0.233659	1.68965	0.591837	0.60839	0.724572	1.15365
VRN2	62	62	9	R2	2	D6	40 FP2	1.88716	1.87328	1.87762	1.72247	1.86897	2.33e-06	8.7e-07	3.31e-06	2.05e-07	2.95e-07	1.42e-06		1.63475	0.611715	2.32975	0.143937	0.207257	1.06194	0.941669	1.43055	0.0789058	0.233659	1.53939	0.649607	1.62857	1.82416	0.887003
EDIN	62	62	9	R2	2	C6	40 FP2	1.88716	1.87328	1.87762	1.72247	1.86897	2.06e-06	8.78e-07	1.24e-06	5.67e-08	3.65e-07	1.35e-06		1.53294	0.652343	0.92244	0.0421129	0.27114	1.06194	0.941669	1.43055	0.0789058	0.233659	1.44352	0.692753	0.644816	0.533711	1.1604
SF2	90	90	12	R1	2	F5	34 FP2	1.887	1.906	1.887	1.758	1.884	4.95e-06	1.3e-06	3e-07	7.72e-09	7.71e-07	2.54e-06		1.94896	0.513093	0.118059	0.00303865	0.303518	1.11716	0.895131	1.21766	0.0518166	0.32288	1.74458	0.573205	0.0969557	0.0586423	0.940033
LHP	62	62	9	R2	2	D5	40 FP2	1.88716	1.87328	1.87762	1.72247	1.86897	3.26e-06	8.31e-07	7.5e-07	4.63e-08	4.81e-07	1.65e-06		1.98024	0.50499	0.455608	0.0281672	0.292283	1.06194	0.941669	1.43055	0.0789058	0.233659	1.86473	0.536272	0.318485	0.356973	1.25089
VIN3-1	62	62	9	R2	2	C5	40 FP2	1.88716	1.87328	1.87762	1.72247	1.86897	3.22e-06	8.31e-07	1.71e-06	8.1e-08	6.11e-10	1.64e-06		1.96759	0.508237	1.04399	0.0495149	0.00037373	1.06194	0.941669	1.43055	0.0789058	0.233659	1.85281	0.53972	0.729781	0.627519	0.00159946
FLDF	62	62	9	R2	2	H7	40 FP2	1.88716	1.87328	1.87762	1.72247	1.86897	2.89e-06	1e-06	7.5e-07	7.71e-08	6.15e-07	1.7e-06		1.70082	0.587953	0.440779	0.0453118	0.361837	1.06194	0.941669	1.43055	0.0789058	0.233659	1.6016	0.624374	0.308119	0.574252	1.54857
SF2	90	90	12	R3	2	G12	37 FP3	1.89376	1.89035	1.87733	1.7121	1.85846	2.59e-06	9.42e-07	1.29e-07	7.18e-09	7.51e-07	1.56e-06		1.65924	0.602685	0.0827338	0.00459573	0.480294	1.15903	0.862792	1.24862	0.11741	0.37378	1.43158	0.698529	0.0662599	0.0391425	1.28497
EDI	62	62	9	R2	2	H6	40 FP2	1.88716	1.87328	1.87762	1.72247	1.86897	3.25e-06	1.05e-06	7.62e-07	3.38e-07	3.91e-07	1.84e-06		1.76128	0.567768	0.413188	0.183176	0.212012	1.06194	0.941669	1.43055	0.0789058	0.233659	1.65854	0.602939	0.288832	2.32145	0.907354
BRO	62	62	9	R2	2	G8	40 FP2	1.88716	1.87328	1.87762	1.72247	1.86897	4.2e-06	1.63e-06	3.69e-06	1.34e-07	7.19e-07	2.61e-06		1.60466	0.623186	1.41236	0.0513579	0.274986	1.06194	0.941669	1.43055	0.0789058	0.233659	1.51105	0.66179	0.987289	0.650876	1.17687
ULL	62	62	9	R2	2	D8	40 FP2	1.88716	1.87328	1.87762	1.72247	1.86897	1.61e-06	6.96e-07	1.6e-06	6.48e-08	2.3e-07	1.06e-06		1.51963	0.658056	1.5105	0.0612095	0.217765	1.06194	0.941669	1.43055	0.0789058	0.233659	1.43098	0.69882	1.05589	0.775729	0.931976
SDG8	62	62	9	R2	2	B7	40 FP2	1.88716	1.87328	1.87762	1.72247	1.86897	1.75e-06	7.79e-07	4.47e-08	2.09e-09	4e-08	1.17e-06		1.4995	0.666888	0.0382869	0.00179144	0.0343045	1.06194	0.941669	1.43055	0.0789058	0.233659	1.41203	0.708198	0.0267638	0.0227035	0.146814
VRN2	97	97	13	R1	1	D11	33 FP3	1.90476	1.91973	1.87895	1.71363	1.89994	1.37e-06	6.63e-07	9.03e-07	6.47e-08	8.39e-07	9.52e-07		1.43648	0.696146	0.947869	0.0679291	0.880895	1.19241	0.838641	1.40727	0.166049	0.290029	1.20469	0.830089	0.673554	0.40909	3.03726
SF2	90	90	12	R2	2	E9	38 FP3	1.88424	1.88371	1.87288	1.74371	1.8741	3.99e-06	1.21e-06	1.46e-07	5.17e-09	6.44e-07	2.2e-06		1.81887	0.549791	0.0664552	0.00235447	0.293375	1.04674	0.955347	1.28768	0.0438876	0.312099	1.73766	0.575488	0.0516083	0.0536477	0.940008
FLDF	97	97	13	R1	1	C11	33 FP3	1.90476	1.91973	1.87895	1.71363	1.89994	4.97e-07	3.37e-07	5.25e-08	5.07e-09	2.82e-07	4.09e-07		1.21465	0.82328	0.128432	0.0123895	0.6902	1.19241	0.838641	1.40727	0.166049	0.290029	1.01866	0.981684	0.0912634	0.0746133	2.37976
VRN5	97	97	13	R1	1	E12	33 FP3	1.90476	1.91973	1.87895	1.71363	1.89994	4.28e-06	1.2e-06	1.42e-06	5.59e-08	8.98e-07	2.27e-06		1.8885	0.529522	0.62471	0.0246448	0.39597	1.19241	0.838641	1.40727	0.166049	0.290029	1.58377	0.631405	0.443917	0.148419	1.36528
VAL	97	97	13	R1	1	G11	33 FP3	1.90476	1.91973	1.87895	1.71363	1.89994	8.02e-07	4.49e-07	1.34e-07	5.2e-09	3.3e-07	6.01e-07		1.33615	0.748418	0.222404	0.00866164	0.549185	1.19241	0.838641	1.40727	0.166049	0.290029	1.12055	0.892417	0.15804	0.052163	1.89355
VAR	97	97	13	R1	1	G10	33 FP3	1.90476	1.91973	1.87895	1.71363	1.89994	1.45e-06	4.16e-07	6.39e-07	4.72e-08	5.48e-07	7.77e-07		1.86785	0.535375	0.822471	0.060757	0.70511	1.19241	0.838641	1.40727	0.166049	0.290029	1.56645	0.638384	0.584446	0.365897	2.43117
EDIN	97	97	13	R1	1	C12	33 FP3	1.90476	1.91973	1.87895	1.71363	1.89994	1.43e-06	5.11e-07	6.54e-08	4.37e-09	3.38e-07	8.54e-07		1.67058	0.598595	0.0765985	0.0051114	0.395467	1.19241	0.838641	1.40727	0.166049	0.290029	1.40101	0.713769	0.0544308	0.0307824	1.36354
FCAF	97	97	13	R1	1	F11	33 FP3	1.90476	1.91973	1.87895	1.71363	1.89994	1.22e-06	6.08e-07	8.47e-08	4.28e-09	3.86e-07	8.62e-07		1.4195	0.704473	0.0982462	0.00496584	0.447097	1.19241	0.838641	1.40727	0.166049	0.290029	1.19045	0.840017	0.0698136	0.0299058	1.54156
SDG8	97	97	13	R1	1	E11	33 FP3	1.90476	1.91973	1.87895	1.71363	1.89994	1.44e-06	5.26e-07	1.51e-08	2.92e-09	1.7e-07	8.71e-07		1.65642	0.60371	0.0173075	0.00335294	0.194955	1.19241	0.838641	1.40727	0.166049	0.290029	1.38915	0.719867	0.0122987	0.0201925	0.67219
BRON	97	97	13	R1	1	E9	33 FP3	1.90476	1.91973	1.87895	1.71363	1.89994	9.56e-07	2.94e-07	1.51e-07	6.01e-09	3.3e-07	5.3e-07		1.80341	0.554504	0.284644	0.0113432	0.622682	1.19241	0.838641	1.40727	0.166049	0.290029	1.51242	0.661194	0.202267	0.068312	2.14696
SF2	90	90	12	R3	1	G10	38 FP3	1.88424	1.88371	1.87288	1.74371	1.8741	1.13e-05	3.08e-06	4.12e-07	3.2e-08	2.65e-06	5.88e-06		1.91245	0.522888	0.0699749	0.00543803	0.449911	1.04674	0.955347	1.28768	0.0438876	0.312099	1.82706	0.547328	0.0543417	0.123908	1.44157
EDI	97	97	13	R1	1	B12	33 FP3	1.90476	1.91973	1.87895	1.71363	1.89994	2.36e-06	7.99e-07	5.29e-08	3.8e-09	5.18e-07	1.37e-06		1.72081	0.581121	0.0384967	0.00276889	0.376877	1.19241	0.838641	1.40727	0.166049	0.290029	1.44314	0.692932	0.0273557	0.0166751	1.29944
LHP	97	97	13	R1	1	F9	33 FP3	1.90476	1.91973	1.87895	1.71363	1.89994	1.52e-06	2.76e-07	6.7e-08	4.44e-09	4.16e-07	6.48e-07		2.35028	0.425481	0.103402	0.00685226	0.64295	1.19241	0.838641	1.40727	0.166049	0.290029	1.97104	0.507346	0.0734775	0.0412664	2.21684
BRO	97	97	13	R1	1	B9	33 FP3	1.90476	1.91973	1.87895	1.71363	1.89994	1.47e-06	4.59e-07	2.53e-07	1.48e-08	6.78e-07	8.21e-07		1.78989	0.558693	0.30815	0.0180757	0.82589	1.19241	0.838641	1.40727	0.166049	0.290029	1.50108	0.666189	0.218971	0.108857	2.84761
VIN3-1	97	97	13	R1	1	C9	33 FP3	1.90476	1.91973	1.87895	1.71363	1.89994	1.46e-06	4.38e-07	5.82e-07	2.71e-08	4.55e-09	7.99e-07		1.82664	0.547453	0.727453	0.0339358	0.00569696	1.19241	0.838641	1.40727	0.166049	0.290029	1.5319	0.652786	0.516927	0.204372	0.0196427
VARN	97	97	13	R1	1	C10	33 FP3	1.90476	1.91973	1.87895	1.71363	1.89994	1.5e-06	4e-07	1.75e-07	7.92e-09	5.19e-07	7.76e-07		1.93789	0.516025	0.225543	0.010203	0.668908	1.19241	0.838641	1.40727	0.166049	0.290029	1.62519	0.615311	0.16027	0.0614453	2.30634
ULL	97	97	13	R1	1	E10	33 FP3	1.90476	1.91973	1.87895	1.71363	1.89994	1.61e-06	5.25e-07	3.36e-07	2.11e-08	6.11e-07	9.21e-07		1.75374	0.57021	0.365162	0.022877	0.663801	1.19241	0.838641	1.40727	0.166049	0.290029	1.47076	0.679922	0.259484	0.137772	2.28874
LOV	97	97	13	R1	1	G12	33 FP3	1.90476	1.91973	1.87895	1.71363	1.89994	1.4e-06	5.63e-07	1.17e-07	6.14e-09	4.95e-07	8.86e-07		1.57413	0.635271	0.131727	0.00693183	0.558692	1.19241	0.838641	1.40727	0.166049	0.290029	1.32013	0.757501	0.0936051	0.0417456	1.92633
SF2	90	90	12	R1	1	C4	42 FP1	1.90308	1.88404	1.88973	1.70096	1.849	6.85e-07	1.98e-07	2.76e-08	1.44e-09	1.48e-07	3.68e-07		1.86157	0.53718	0.0750079	0.00391902	0.400805	1.03003	0.970847	1.29221	0.126543	0.347439	1.8073	0.553311	0.0580464	0.03097	1.1536
NIL2	97	97	13	R1	1	H9	33 FP3	1.90476	1.91973	1.87895	1.71363	1.89994	1.93e-06	4.89e-07	1.6e-07	8.77e-09	5.13e-07	9.72e-07		1.988	0.503018	0.164428	0.00902686	0.527655	1.19241	0.838641	1.40727	0.166049	0.290029	1.66722	0.599802	0.116842	0.0543625	1.81932
NIL1	97	97	13	R1	1	F10	33 FP3	1.90476	1.91973	1.87895	1.71363	1.89994	1.17e-06	3.73e-07	1.67e-07	7.84e-09	4.2e-07	6.62e-07		1.77427	0.563613	0.252588	0.0118466	0.634136	1.19241	0.838641	1.40727	0.166049	0.290029	1.48797	0.672056	0.179488	0.0713436	2.18645
FVEF	97	97	13	R1	1	B11	33 FP3	1.90476	1.91973	1.87895	1.71363	1.89994	7.58e-07	5.54e-07	1.41e-07	1.23e-08	6.14e-07	6.48e-07		1.16943	0.855118	0.217586	0.0189998	0.947113	1.19241	0.838641	1.40727	0.166049	0.290029	0.980731	1.01965	0.154616	0.114422	3.26558
NDX	97	97	13	R1	1	D12	33 FP3	1.90476	1.91973	1.87895	1.71363	1.89994	1.6e-06	4.55e-07	2.74e-08	1.7e-09	3.86e-07	8.52e-07		1.8742	0.533561	0.0320985	0.00199501	0.452279	1.19241	0.838641	1.40727	0.166049	0.290029	1.57178	0.636222	0.0228092	0.0120146	1.55942
COL	97	97	13	R1	1	D10	33 FP3	1.90476	1.91973	1.87895	1.71363	1.89994	1.37e-06	5.02e-07	5.03e-09	1.61e-09	5.98e-07	8.29e-07		1.65241	0.605178	0.00607007	0.00194688	0.721497	1.19241	0.838641	1.40727	0.166049	0.290029	1.38577	0.721618	0.00431338	0.0117247	2.48767
SF2	90	90	12	R2	1	D1	43 FP1	1.90691	1.88404	1.88879	1.70696	1.85024	4.85e-06	1.22e-06	5.04e-07	2.08e-08	1.05e-06	2.43e-06		1.99516	0.501213	0.207134	0.00856932	0.430505	1.22907	0.813622	1.60415	0.120469	0.387149	1.62331	0.616027	0.129124	0.0711328	1.11199
VIN3	90	90	12	R1	2	G5	34 FP2	1.887	1.906	1.887	1.758	1.884	2.12e-06	5.74e-07	9.88e-07	3.24e-08	2.41e-09	1.1e-06		1.9228	0.520076	0.896049	0.02941	0.00218032	1.11716	0.895131	1.21766	0.0518166	0.32288	1.72115	0.581006	0.735876	0.567578	0.00675273
VIN3	90	90	12	R3	2	F12	37 FP3	1.89376	1.89035	1.87733	1.7121	1.85846	1.96e-06	5.06e-07	4.21e-07	2.95e-08	6.39e-09	9.96e-07		1.97038	0.507516	0.422963	0.0296402	0.006408	1.15903	0.862792	1.24862	0.11741	0.37378	1.70003	0.588225	0.338743	0.25245	0.0171438
VIN3	90	90	12	R2	2	D9	38 FP3	1.88424	1.88371	1.87288	1.74371	1.8741	5.31e-06	9.59e-07	1.15e-06	4.13e-08	4.81e-09	2.26e-06		2.35292	0.425003	0.507774	0.0182926	0.00212969	1.04674	0.955347	1.28768	0.0438876	0.312099	2.24786	0.444868	0.394331	0.416805	0.00682377
VIN3	90	90	12	R3	1	F10	38 FP3	1.88424	1.88371	1.87288	1.74371	1.8741	3.91e-06	9.93e-07	4.38e-07	4.08e-08	4.59e-07	1.97e-06		1.98549	0.503654	0.222255	0.0206822	0.232691	1.04674	0.955347	1.28768	0.0438876	0.312099	1.89683	0.527195				some contamination?
SF2	97	97	13	R1	1	H12	33 FP3	1.90476	1.91973	1.87895	1.71363	1.89994	1.19e-06	6.5e-07	9.97e-08	4.12e-09	3.73e-07	8.79e-07		1.35315	0.739018	0.113415	0.0046871	0.424427	1.19241	0.838641	1.40727	0.166049	0.290029	1.1348	0.881209	0.0805927	0.0282272	1.46339
VIN3	90	90	12	R2	1	E1	43 FP1	1.90691	1.88404	1.88879	1.70696	1.85024	3.79e-06	8.57e-07	1.18e-06	7.13e-08	1.13e-08	1.8e-06		2.10264	0.475593	0.656095	0.03954	0.00624362	1.22907	0.813622	1.60415	0.120469	0.387149	1.71075	0.584538	0.408999	0.328216	0.0161272
VIN3	97	97	13	R1	1	F12	33 FP3	1.90476	1.91973	1.87895	1.71363	1.89994	1.47e-06	4.9e-07	3.7e-07	1.75e-08	2.67e-09	8.47e-07		1.72987	0.578079	0.436882	0.0206504	0.00315369	1.19241	0.838641	1.40727	0.166049	0.290029	1.45074	0.689305	0.310447	0.124363	0.0108737
VIN3	97	97	13	R1	2	B9	34 FP3	1.90007	1.9081	1.89161	1.70595	1.8921	1.05e-06	4.03e-07	3.49e-07	1.16e-08	1.36e-09	6.5e-07		1.61361	0.619727	0.537747	0.0177921	0.00209132	1.10837	0.902228	1.19943	0.163467	0.305652	1.45585	0.686884	0.448334	0.108843	0.00684216
VIN3	97	97	13	R3	1	C11	36 FP3	1.90484	1.92254	1.88493	1.70758	1.90467	1.47e-06	6.08e-07	9.15e-07	7.45e-08	1.54e-09	9.47e-07		1.55777	0.641943	0.966545	0.0786619	0.00163125	1.29712	0.770942	1.62889	0.199244	0.296335	1.20095	0.832673	0.593375	0.394802	0.00550473
SF2	97	97	13	R1	2	D11	34 FP3	1.90007	1.9081	1.89161	1.70595	1.8921	2.31e-06	8.71e-07	9.89e-08	5.19e-09	5.79e-07	1.42e-06		1.62828	0.614146	0.0697399	0.003659	0.408237	1.10837	0.902228	1.19943	0.163467	0.305652	1.46908	0.680699	0.058144	0.0223838	1.33563
SF2	97	97	13	R3	1	G9	36 FP3	1.90484	1.92254	1.88493	1.70758	1.90467	1.65e-06	3.85e-07	5.42e-08	3.16e-09	3.85e-07	7.98e-07		2.07165	0.482708	0.0678865	0.00396405	0.482015	1.29712	0.770942	1.62889	0.199244	0.296335	1.59712	0.626128	0.0416764	0.0198955	1.62659
SF2	97	97	13	R3	2	F6	37 FP2	1.89408	1.901	1.88665	1.74972	1.89907	1.9e-06	6.76e-07	7.35e-08	6.57e-09	1.17e-06	1.13e-06		1.67768	0.596062	0.0647809	0.00579767	1.03591	1.06512	0.93886	1.2439	0.0541089	0.234938	1.5751	0.634879	0.0520787	0.107148	4.4093
SF2	97	97	13	R2	1	D10	43 FP3	1.92215	1.89058	1.89853	1.73018	1.87335	3.31e-06	9.5e-07	2.18e-07	3.67e-09	1.78e-06	1.77e-06		1.86591	0.535932	0.123097	0.00206912	1.0056	0.93755	1.06661	1.44035	0.0976499	0.270031	1.9902	0.502463	0.0854634	0.0211892	3.72401
SF2	97	97	13	R2	2	D4	44 FP1	1.93455	1.89655	1.90875	1.77613	1.89321	2.82e-06	2.1e-06	2.1e-07	7.06e-09	9.33e-07	2.43e-06		1.15861	0.863101	0.0865796	0.00290518	0.384077	0.951411	1.05107	1.41709	0.0384577	0.224735	1.21778	0.821164	0.0610967	0.0755423	1.70902
VIN3	97	97	13	R3	2	E5	37 FP2	1.89408	1.901	1.88665	1.74972	1.89907	3.52e-06	1.06e-06	1.24e-06	2.75e-08	2.85e-09	1.93e-06		1.82002	0.549443	0.643484	0.0142138	0.00147623	1.06512	0.93886	1.2439	0.0541089	0.234938	1.70875	0.585224	0.51731	0.262689	0.00628347
VIN3	97	97	13	R2	1	C10	43 FP3	1.92215	1.89058	1.89853	1.73018	1.87335	5e-06	1.51e-06	3.23e-06	9.87e-08	1.81e-08	2.75e-06		1.82153	0.548988	1.17699	0.0359213	0.00660623	0.93755	1.06661	1.44035	0.0976499	0.270031	1.94287	0.514703	0.817158	0.367858	0.0244647
VIN3	97	97	13	R2	2	E3	44 FP1	1.93455	1.89655	1.90875	1.77613	1.89321	4.74e-06	1.82e-06	1.73e-06	2.66e-08	2.63e-09	2.93e-06		1.61643	0.618646	0.589711	0.00905458	0.000896137	0.951411	1.05107	1.41709	0.0384577	0.224735	1.69899	0.588587	0.416142	0.235443	0.00398752
VIN3	132	132	14	R1	1	D8	34 FP2	1.887	1.906	1.887	1.758	1.884	3.9e-06	1.31e-06	7.96e-07	1.57e-08	1.18e-08	2.26e-06		1.72493	0.579734	0.352469	0.00695899	0.00524165	1.11716	0.895131	1.21766	0.0518166	0.32288	1.54404	0.647652	0.289463	0.1343	0.0162341
SF2	132	132	14	R1	1	C8	34 FP2	1.887	1.906	1.887	1.758	1.884	2.66e-06	1.08e-06	1.34e-08	0	1.33e-06	1.69e-06		1.56996	0.63696	0.00792013	0	0.789024	1.11716	0.895131	1.21766	0.0518166	0.32288	1.40532	0.711583	0.00650437	0	2.44371
FCAF	97	97	13	R1	2	G12	34 FP3	1.90007	1.9081	1.89161	1.70595	1.8921	3.18e-06	8.9e-07	1.12e-07	7.68e-09	1.09e-06	1.68e-06		1.89018	0.52905	0.0666101	0.00456156	0.649769	1.10837	0.902228	1.19943	0.163467	0.305652	1.70537	0.586382	0.0555346	0.0279051	2.12585
FVEF	97	97	13	R1	2	B12	34 FP3	1.90007	1.9081	1.89161	1.70595	1.8921	2.23e-06	7.77e-07	7.49e-08	4.06e-09	7.56e-07	1.32e-06		1.69412	0.590276	0.0568832	0.00308258	0.574773	1.10837	0.902228	1.19943	0.163467	0.305652	1.52849	0.654242	0.047425	0.0188575	1.88049
NIL1	97	97	13	R1	2	G9	34 FP3	1.90007	1.9081	1.89161	1.70595	1.8921	1.97e-06	5.2e-07	2.03e-07	1.14e-08	6.63e-07	1.01e-06		1.94622	0.513815	0.200469	0.0112115	0.654427	1.10837	0.902228	1.19943	0.163467	0.305652	1.75594	0.569496	0.167137	0.068586	2.14109
COL	97	97	13	R1	2	H10	34 FP3	1.90007	1.9081	1.89161	1.70595	1.8921	1.58e-06	4.85e-07	6.53e-10	1.62e-09	3.54e-07	8.75e-07		1.80509	0.553988	0.000746526	0.0018511	0.40484	1.10837	0.902228	1.19943	0.163467	0.305652	1.62861	0.614022	0.000622399	0.011324	1.32452
VIN3-1	97	97	13	R1	2	G10	34 FP3	1.90007	1.9081	1.89161	1.70595	1.8921	2.13e-06	6.54e-07	6.85e-07	5.73e-08	3.7e-09	1.18e-06		1.80626	0.55363	0.580481	0.0485811	0.00313178	1.10837	0.902228	1.19943	0.163467	0.305652	1.62966	0.613625	0.483963	0.297193	0.0102462
NDX	97	97	13	R1	2	E12	34 FP3	1.90007	1.9081	1.89161	1.70595	1.8921	3e-06	8.1e-07	4.55e-08	5.12e-09	8.44e-07	1.56e-06		1.92512	0.519448	0.0291874	0.0032846	0.541448	1.10837	0.902228	1.19943	0.163467	0.305652	1.7369	0.575739	0.0243343	0.0200934	1.77146
BRO	97	97	13	R1	2	C11	34 FP3	1.90007	1.9081	1.89161	1.70595	1.8921	1.76e-06	6.07e-07	1.79e-07	8.13e-09	6.89e-07	1.03e-06		1.70439	0.586721	0.172708	0.0078592	0.665792	1.10837	0.902228	1.19943	0.163467	0.305652	1.53775	0.650302	0.143992	0.0480783	2.17827
ULLN	97	97	13	R1	2	H11	34 FP3	1.90007	1.9081	1.89161	1.70595	1.8921	2.88e-06	9.38e-07	2.15e-07	2.4e-08	9.35e-07	1.65e-06		1.75357	0.570265	0.130953	0.0146064	0.568511	1.10837	0.902228	1.19943	0.163467	0.305652	1.58212	0.632063	0.109179	0.0893538	1.86
EDI	97	97	13	R1	2	F11	34 FP3	1.90007	1.9081	1.89161	1.70595	1.8921	3.03e-06	9.1e-07	5.68e-08	1.06e-08	7.46e-07	1.66e-06		1.82361	0.548364	0.0342128	0.00638181	0.44986	1.10837	0.902228	1.19943	0.163467	0.305652	1.64531	0.607789	0.0285241	0.0390404	1.47181
VAL	97	97	13	R1	2	B11	34 FP3	1.90007	1.9081	1.89161	1.70595	1.8921	1.9e-06	6.78e-07	1.61e-07	9.11e-09	5.77e-07	1.14e-06		1.67646	0.596495	0.141965	0.00801797	0.508119	1.10837	0.902228	1.19943	0.163467	0.305652	1.51255	0.661135	0.11836	0.0490496	1.66241
VRN2	97	97	13	R1	2	H12	34 FP3	1.90007	1.9081	1.89161	1.70595	1.8921	2.5e-06	7.72e-07	9e-07	6.19e-08	8.72e-07	1.39e-06		1.79815	0.556126	0.648442	0.0446355	0.628124	1.10837	0.902228	1.19943	0.163467	0.305652	1.62234	0.616392	0.540624	0.273056	2.05503
LHP	97	97	13	R1	2	F10	34 FP3	1.90007	1.9081	1.89161	1.70595	1.8921	1.63e-06	4.74e-07	1e-07	9.13e-09	3.51e-07	8.8e-07		1.85616	0.538747	0.113773	0.0103779	0.398533	1.10837	0.902228	1.19943	0.163467	0.305652	1.67468	0.597129	0.0948554	0.0634864	1.30388
VAR	97	97	13	R1	2	E10	34 FP3	1.90007	1.9081	1.89161	1.70595	1.8921	1.83e-06	5.84e-07	3.8e-07	2.42e-08	3.95e-07	1.03e-06		1.7717	0.564429	0.3677	0.023394	0.382211	1.10837	0.902228	1.19943	0.163467	0.305652	1.59848	0.625594	0.306562	0.143112	1.25048
EDIN	97	97	13	R1	2	D9	34 FP3	1.90007	1.9081	1.89161	1.70595	1.8921	1.8e-06	3.56e-07	6e-08	9.38e-09	4.49e-07	7.99e-07		2.247	0.445038	0.0750447	0.0117361	0.561364	1.10837	0.902228	1.19943	0.163467	0.305652	2.02731	0.493265	0.0625668	0.071795	1.83662
VRN5	97	97	13	R1	2	C12	34 FP3	1.90007	1.9081	1.89161	1.70595	1.8921	2.05e-06	5.2e-07	5.06e-07	2.92e-08	5.8e-07	1.03e-06		1.98497	0.503787	0.489709	0.0283037	0.561194	1.10837	0.902228	1.19943	0.163467	0.305652	1.79089	0.558381	0.408283	0.173147	1.83606
ULL	97	97	13	R1	2	H9	34 FP3	1.90007	1.9081	1.89161	1.70595	1.8921	1.95e-06	6.42e-07	2.55e-07	1.61e-08	6.45e-07	1.12e-06		1.74519	0.573002	0.227651	0.0143619	0.576051	1.10837	0.902228	1.19943	0.163467	0.305652	1.57456	0.635097	0.189799	0.0878585	1.88467
FLDF	97	97	13	R1	2	D12	34 FP3	1.90007	1.9081	1.89161	1.70595	1.8921	2.2e-06	6.03e-07	4.85e-08	2.9e-09	4.9e-07	1.15e-06		1.90943	0.523717	0.0420985	0.00251587	0.425619	1.10837	0.902228	1.19943	0.163467	0.305652	1.72274	0.580471	0.0350987	0.0153907	1.3925
SDG8	97	97	13	R1	2	F12	34 FP3	1.90007	1.9081	1.89161	1.70595	1.8921	2.63e-06	6.45e-07	2.07e-08	5.06e-09	2.42e-07	1.3e-06		2.02104	0.494796	0.0158558	0.00388299	0.185928	1.10837	0.902228	1.19943	0.163467	0.305652	1.82344	0.548415	0.0132194	0.023754	0.608301
NIL2	97	97	13	R1	2	B10	34 FP3	1.90007	1.9081	1.89161	1.70595	1.8921	1.64e-06	2.84e-07	9.18e-08	4.14e-09	3.05e-07	6.82e-07		2.40109	0.416478	0.134722	0.00607176	0.44745	1.10837	0.902228	1.19943	0.163467	0.305652	2.16633	0.46161	0.112321	0.0371437	1.46392
VIN3	132	132	14	R2	2	F10	37 FP3	1.89376	1.89035	1.87733	1.7121	1.85846	2.79e-06	9.97e-07	5.49e-07	3.79e-08	1.22e-08	1.67e-06		1.6735	0.59755	0.329384	0.0227473	0.0073421	1.15903	0.862792	1.24862	0.11741	0.37378	1.44388	0.692577	0.263797	0.193742	0.0196428
LOV	97	97	13	R1	2	G11	34 FP3	1.90007	1.9081	1.89161	1.70595	1.8921	2.36e-06	7.25e-07	1.66e-07	2.43e-08	9.67e-07	1.31e-06		1.80246	0.554797	0.126611	0.0186107	0.73992	1.10837	0.902228	1.19943	0.163467	0.305652	1.62623	0.614918	0.105559	0.11385	2.4208
VARN	97	97	13	R1	2	D10	34 FP3	1.90007	1.9081	1.89161	1.70595	1.8921	1.99e-06	5.25e-07	1.22e-07	3.38e-09	4.45e-07	1.02e-06		1.94792	0.513367	0.119791	0.00330531	0.434865	1.10837	0.902228	1.19943	0.163467	0.305652	1.75747	0.568999	0.0998731	0.0202201	1.42275
SF2	132	132	14	R2	2	G10	37 FP3	1.89376	1.89035	1.87733	1.7121	1.85846	4.46e-06	1.77e-06	1.18e-08	1.97e-10	4.14e-06	2.81e-06		1.58738	0.629969	0.00420594	7.01e-05	1.47301	1.15903	0.862792	1.24862	0.11741	0.37378	1.36958	0.730151	0.00336846	0.00059711	3.94084
BRON	97	97	13	R1	2	E9	34 FP3	1.90007	1.9081	1.89161	1.70595	1.8921	2.17e-06	5.25e-07	1.41e-07	9.14e-09	6.68e-07	1.07e-06		2.03296	0.491893	0.132192	0.00856021	0.62582	1.10837	0.902228	1.19943	0.163467	0.305652	1.8342	0.545198	0.110212	0.0523667	2.04749
ULL	97	97	13	R3	1	G10	36 FP3	1.90484	1.92254	1.88493	1.70758	1.90467	9.7e-07	3.58e-07	2.85e-07	1.94e-08	4.07e-07	5.9e-07		1.64509	0.60787	0.483326	0.0328322	0.69018	1.29712	0.770942	1.62889	0.199244	0.296335	1.26827	0.788478	0.29672	0.164784	2.32905
BRO	97	97	13	R3	1	C12	36 FP3	1.90484	1.92254	1.88493	1.70758	1.90467	1.72e-06	4.89e-07	2.56e-07	2.25e-08	8.38e-07	9.16e-07		1.87322	0.53384	0.279384	0.0245853	0.915066	1.29712	0.770942	1.62889	0.199244	0.296335	1.44414	0.692451	0.171518	0.123393	3.08794
FLDF	97	97	13	R3	1	B9	036 FP3	1.90484	1.92254	1.88493	1.70758	1.90467	6.6e-07	3.3e-07	6.27e-08	3.12e-09	2.03e-07	4.67e-07		1.41536	0.706535	0.134288	0.00668052	0.435787	1.29712	0.770942	1.62889	0.199244	0.296335	1.09116	0.916457	0.0824409	0.0335293	1.47059
NIL2	97	97	13	R3	1	F10	36 FP3	1.90484	1.92254	1.88493	1.70758	1.90467	1.38e-06	4.14e-07	1.35e-07	9.26e-09	3.87e-07	7.57e-07		1.82584	0.547694	0.1781	0.0122374	0.51168	1.29712	0.770942	1.62889	0.199244	0.296335	1.40761	0.710423	0.109338	0.0614193	1.72669
VIN3	132	132	14	R2	1	F12	38 FP3	1.88424	1.88371	1.87288	1.74371	1.8741	8.82e-07	5.43e-07	2.13e-07	3.51e-09	1.57e-09	6.92e-07		1.27409	0.784876	0.307827	0.00507649	0.00226962	1.04674	0.955347	1.28768	0.0438876	0.312099	1.21719	0.821561	0.239055	0.11567	0.00727213
NIL1	97	97	13	R3	1	H12	36 FP3	1.90484	1.92254	1.88493	1.70758	1.90467	1.24e-06	3.64e-07	1.56e-07	9.7e-09	4.34e-07	6.72e-07		1.84655	0.54155	0.232033	0.014439	0.64646	1.29712	0.770942	1.62889	0.199244	0.296335	1.42358	0.702453	0.142448	0.072469	2.18151
COL	97	97	13	R3	1	F12	36 FP3	1.90484	1.92254	1.88493	1.70758	1.90467	1.35e-06	4.42e-07	9.61e-10	1.4e-09	3.96e-07	7.73e-07		1.74685	0.572458	0.00124322	0.00180904	0.511908	1.29712	0.770942	1.62889	0.199244	0.296335	1.34672	0.742544	0.000763232	0.00907949	1.72746
LHP	97	97	13	R3	1	C9	36 FP3	1.90484	1.92254	1.88493	1.70758	1.90467	5.9e-07	3.3e-07	1.36e-07	1.2e-08	2.93e-07	4.41e-07		1.33753	0.747646	0.307584	0.0272376	0.663564	1.29712	0.770942	1.62889	0.199244	0.296335	1.03116	0.969782	0.18883	0.136705	2.23924
SF2	132	132	14	R2	1	H12	38 FP3	1.88424	1.88371	1.87288	1.74371	1.8741	1.02e-06	4.17e-07	1.2e-08	6.21e-10	7.4e-07	6.52e-07		1.56515	0.638917	0.018455	0.000952051	1.13422	1.04674	0.955347	1.28768	0.0438876	0.312099	1.49526	0.66878	0.0143319	0.0216929	3.63416
VIN3-1	97	97	13	R3	1	H11	36 FP3	1.90484	1.92254	1.88493	1.70758	1.90467	1.48e-06	5.8e-07	6.84e-07	6e-08	6.26e-09	9.25e-07		1.59534	0.626825	0.738917	0.064789	0.0067697	1.29712	0.770942	1.62889	0.199244	0.296335	1.22992	0.813064	0.453631	0.325174	0.0228447
NDX	97	97	13	R3	1	H10	36 FP3	1.90484	1.92254	1.88493	1.70758	1.90467	1.13e-06	4.08e-07	3.63e-08	1.79e-09	4.51e-07	6.78e-07		1.66385	0.601017	0.053444	0.00263262	0.664719	1.29712	0.770942	1.62889	0.199244	0.296335	1.28273	0.779588	0.03281	0.013213	2.24313
VARN	97	97	13	R3	1	B12	36 FP3	1.90484	1.92254	1.88493	1.70758	1.90467	1.29e-06	3.66e-07	2.02e-07	9.76e-09	5.68e-07	6.88e-07		1.88002	0.531909	0.293271	0.0141952	0.826617	1.29712	0.770942	1.62889	0.199244	0.296335	1.44939	0.689947	0.180043	0.0712453	2.78946
FCAF	97	97	13	R3	1	C10	36 FP3	1.90484	1.92254	1.88493	1.70758	1.90467	1.35e-06	4.34e-07	9.15e-08	7.34e-09	4.19e-07	7.66e-07		1.76508	0.566546	0.119391	0.00958051	0.546769	1.29712	0.770942	1.62889	0.199244	0.296335	1.36078	0.734875	0.0732956	0.0480843	1.8451
LOV	97	97	13	R3	1	D12	36 FP3	1.90484	1.92254	1.88493	1.70758	1.90467	1.62e-06	3.93e-07	1.6e-07	1.94e-08	7.31e-07	7.98e-07		2.03085	0.492404	0.200422	0.0242794	0.916079	1.29712	0.770942	1.62889	0.199244	0.296335	1.56567	0.638705	0.123042	0.121858	3.09136
EDIN	97	97	13	R3	1	G11	36 FP3	1.90484	1.92254	1.88493	1.70758	1.90467	9.6e-07	4.55e-07	8.04e-08	8.07e-09	5.02e-07	6.61e-07		1.45192	0.688743	0.121601	0.0122156	0.759626	1.29712	0.770942	1.62889	0.199244	0.296335	1.11935	0.893378	0.0746523	0.0613096	2.5634
BRON	97	97	13	R3	1	D11	36 FP3	1.90484	1.92254	1.88493	1.70758	1.90467	1.59e-06	6.23e-07	2.22e-07	1.5e-08	6.73e-07	9.96e-07		1.6003	0.624884	0.222613	0.0150679	0.675212	1.29712	0.770942	1.62889	0.199244	0.296335	1.23374	0.810546	0.136665	0.0756252	2.27854
VAL	97	97	13	R3	1	H9	36 FP3	1.90484	1.92254	1.88493	1.70758	1.90467	1.73e-06	3.73e-07	2.21e-07	1.75e-08	6.49e-07	8.03e-07		2.15486	0.464067	0.274759	0.0217374	0.808619	1.29712	0.770942	1.62889	0.199244	0.296335	1.66127	0.601948	0.168678	0.109099	2.72873
ULLN	97	97	13	R3	1	D9	36 FP3	1.90484	1.92254	1.88493	1.70758	1.90467	9.61e-07	4.22e-07	1.15e-07	1.41e-08	3.1e-07	6.37e-07		1.50846	0.662926	0.180625	0.0220508	0.486498	1.29712	0.770942	1.62889	0.199244	0.296335	1.16294	0.859892	0.110888	0.110672	1.64171
VRN5	97	97	13	R3	1	E12	36 FP3	1.90484	1.92254	1.88493	1.70758	1.90467	1.52e-06	4.96e-07	9.11e-07	9.64e-08	4.87e-07	8.69e-07		1.75035	0.571314	1.0484	0.110977	0.560517	1.29712	0.770942	1.62889	0.199244	0.296335	1.34942	0.74106	0.643627	0.556992	1.8915
EDI	97	97	13	R3	1	D10	36 FP3	1.90484	1.92254	1.88493	1.70758	1.90467	1.49e-06	4.58e-07	5.13e-08	6.97e-09	4.1e-07	8.27e-07		1.80454	0.554157	0.0620041	0.0084307	0.49616	1.29712	0.770942	1.62889	0.199244	0.296335	1.3912	0.718805	0.0380651	0.0423134	1.67432
SDG8	97	97	13	R3	1	E9	36 FP3	1.90484	1.92254	1.88493	1.70758	1.90467	1.19e-06	4.38e-07	1.02e-08	2.54e-09	1.22e-07	7.21e-07		1.64735	0.607037	0.0141943	0.00352759	0.169464	1.29712	0.770942	1.62889	0.199244	0.296335	1.27001	0.787397	0.00871406	0.0177049	0.571867
VAR	97	97	13	R3	1	E11	36 FP3	1.90484	1.92254	1.88493	1.70758	1.90467	1.68e-06	7.24e-07	9.93e-07	8.35e-08	6.05e-07	1.1e-06		1.52419	0.656087	0.899896	0.0756775	0.548456	1.29712	0.770942	1.62889	0.199244	0.296335	1.17506	0.851021	0.552458	0.379823	1.8508
VRN2	97	97	13	R3	2	B8	37 FP2	1.89408	1.901	1.88665	1.74972	1.89907	1.11e-05	6.1e-06	7.76e-06	2.7e-07	7.2e-06	8.21e-06		1.34662	0.742601	0.944954	0.0328535	0.877269	1.06512	0.93886	1.2439	0.0541089	0.234938	1.26428	0.790961	0.759668	0.607174	3.73404
LHP	97	97	13	R3	2	H7	37 FP2	1.89408	1.901	1.88665	1.74972	1.89907	2.43e-06	1.11e-06	1.46e-07	2.14e-09	8.98e-07	1.64e-06		1.47972	0.675802	0.0889283	0.00130329	0.547583	1.06512	0.93886	1.2439	0.0541089	0.234938	1.38925	0.719812	0.0714913	0.0240864	2.33075
VIN3-1	97	97	13	R3	2	H5	37 FP2	1.89408	1.901	1.88665	1.74972	1.89907	2.09e-06	5.34e-07	7.38e-07	1.91e-08	1.33e-08	1.06e-06		1.98012	0.50502	0.698059	0.0180264	0.012562	1.06512	0.93886	1.2439	0.0541089	0.234938	1.85905	0.537908	0.561184	0.33315	0.0534694
FVEF	97	97	13	R3	2	H6	37 FP2	1.89408	1.901	1.88665	1.74972	1.89907	8.56e-06	4.95e-06	8.35e-07	1.28e-08	4.65e-06	6.51e-06		1.31503	0.760439	0.128204	0.00196335	0.713738	1.06512	0.93886	1.2439	0.0541089	0.234938	1.23463	0.80996	0.103066	0.0362851	3.03798
BRON	97	97	13	R3	2	B6	37 FP2	1.89408	1.901	1.88665	1.74972	1.89907	3.52e-06	1.38e-06	2.72e-07	2.72e-09	1.14e-06	2.21e-06		1.59662	0.626324	0.123045	0.00123064	0.516654	1.06512	0.93886	1.2439	0.0541089	0.234938	1.499	0.667111	0.0989183	0.0227438	2.1991
COL	97	97	13	R3	2	G6	37 FP2	1.89408	1.901	1.88665	1.74972	1.89907	9.31e-06	4.98e-06	1.02e-08	6.76e-10	4.13e-06	6.81e-06		1.36824	0.730865	0.00149831	9.93e-05	0.607016	1.06512	0.93886	1.2439	0.0541089	0.234938	1.28459	0.77846	0.00120452	0.00183511	2.58373
EDI	97	97	13	R3	2	G5	37 FP2	1.89408	1.901	1.88665	1.74972	1.89907	5.06e-06	2.2e-06	1.87e-07	6.38e-09	1.92e-06	3.34e-06		1.51749	0.658983	0.055961	0.00191239	0.575431	1.06512	0.93886	1.2439	0.0541089	0.234938	1.42471	0.701897	0.0449882	0.0353433	2.44929
VARN	97	97	13	R3	2	C8	37 FP2	1.89408	1.901	1.88665	1.74972	1.89907	2.56e-06	1.43e-06	3.78e-07	6.82e-09	1.24e-06	1.91e-06		1.33859	0.747056	0.197559	0.0035682	0.650865	1.06512	0.93886	1.2439	0.0541089	0.234938	1.25675	0.795705	0.158822	0.0659448	2.77037
ULL	97	97	13	R3	2	F5	37 FP2	1.89408	1.901	1.88665	1.74972	1.89907	3.66e-06	1.05e-06	3.87e-07	9.44e-09	1.48e-06	1.96e-06		1.86644	0.53578	0.197605	0.0048161	0.755205	1.06512	0.93886	1.2439	0.0541089	0.234938	1.75232	0.570671	0.158859	0.0890075	3.21448
NIL1	97	97	13	R3	2	F8	37 FP2	1.89408	1.901	1.88665	1.74972	1.89907	1.56e-06	1.13e-06	4.03e-07	5.57e-09	9.23e-07	1.32e-06		1.17404	0.851759	0.304257	0.00420672	0.696895	1.06512	0.93886	1.2439	0.0541089	0.234938	1.10226	0.907227	0.244598	0.0777455	2.96629
LOV	97	97	13	R3	2	F7	37 FP2	1.89408	1.901	1.88665	1.74972	1.89907	2.88e-06	1.24e-06	2.98e-07	1.33e-08	1.75e-06	1.89e-06		1.52316	0.656531	0.157607	0.00705699	0.927081	1.06512	0.93886	1.2439	0.0541089	0.234938	1.43003	0.699286	0.126704	0.130422	3.94607
NDX	97	97	13	R3	2	E6	37 FP2	1.89408	1.901	1.88665	1.74972	1.89907	3.42e-06	1.56e-06	8.71e-08	1.68e-09	1.95e-06	2.31e-06		1.4805	0.675449	0.0377225	0.000728512	0.846386	1.06512	0.93886	1.2439	0.0541089	0.234938	1.38998	0.719435	0.0303259	0.0134638	3.60259
VIN3	132	132	14	R3	2	C3	41 FP1	1.89023	1.88812	1.9013	1.73901	1.84621	2.98e-06	2.16e-06	1.24e-06	1.88e-08	6.12e-09	2.54e-06		1.1743	0.851568	0.488214	0.00740216	0.0024095	1.0889	0.918361	1.1708	0.0588638	0.323463	1.07844	0.927269	0.416993	0.12575	0.00744906
VAR	97	97	13	R3	2	D5	37 FP2	1.89408	1.901	1.88665	1.74972	1.89907	3.49e-06	1.43e-06	8.95e-07	2.21e-08	1.01e-06	2.24e-06		1.56015	0.640965	0.399841	0.00987406	0.452598	1.06512	0.93886	1.2439	0.0541089	0.234938	1.46476	0.682706	0.32144	0.182485	1.92646
VAL	97	97	13	R3	2	B7	37 FP2	1.89408	1.901	1.88665	1.74972	1.89907	4.45e-06	2.16e-06	5.58e-07	1.3e-08	2.18e-06	3.1e-06		1.4334	0.697642	0.179855	0.00419051	0.703557	1.06512	0.93886	1.2439	0.0541089	0.234938	1.34576	0.743074	0.144589	0.0774459	2.99465
SDG8	97	97	13	R3	2	C7	37 FP2	1.89408	1.901	1.88665	1.74972	1.89907	2.29e-06	5.76e-07	1.5e-08	1.07e-09	3.37e-07	1.15e-06		1.99543	0.501145	0.0130134	0.000933654	0.293554	1.06512	0.93886	1.2439	0.0541089	0.234938	1.87343	0.53378	0.0104618	0.0172551	1.24949
FLDF	97	97	13	R3	2	G8	37 FP2	1.89408	1.901	1.88665	1.74972	1.89907	2.93e-06	2.27e-06	1.82e-07	2.57e-09	1.85e-06	2.58e-06		1.13614	0.880176	0.0705389	0.000998251	0.717378	1.06512	0.93886	1.2439	0.0541089	0.234938	1.06667	0.937495	0.0567077	0.0184489	3.05348
BRO	97	97	13	R3	2	C6	37 FP2	1.89408	1.901	1.88665	1.74972	1.89907	4.38e-06	8.86e-07	4.28e-07	1.13e-08	2.29e-06	1.97e-06		2.22435	0.44957	0.216913	0.00571988	1.16049	1.06512	0.93886	1.2439	0.0541089	0.234938	2.08835	0.478847	0.174381	0.10571	4.93954
NIL2	97	97	13	R3	2	D7	37 FP2	1.89408	1.901	1.88665	1.74972	1.89907	4.54e-06	1.69e-06	3.59e-07	8.38e-09	1.93e-06	2.77e-06		1.64069	0.609498	0.12983	0.00303031	0.696486	1.06512	0.93886	1.2439	0.0541089	0.234938	1.54038	0.649189	0.104373	0.0560038	2.96455
EDIN	97	97	13	R3	2	E7	37 FP2	1.89408	1.901	1.88665	1.74972	1.89907	2.19e-06	6.1e-07	1.06e-07	2.2e-09	1.1e-06	1.16e-06		1.89488	0.527738	0.0913175	0.00189958	0.950247	1.06512	0.93886	1.2439	0.0541089	0.234938	1.77903	0.562105	0.0734121	0.0351066	4.04467
ULLN	97	97	13	R3	2	G7	37 FP2	1.89408	1.901	1.88665	1.74972	1.89907	4.33e-06	1.28e-06	2.91e-07	7.12e-09	1.83e-06	2.35e-06		1.84049	0.543333	0.123749	0.00302348	0.778768	1.06512	0.93886	1.2439	0.0541089	0.234938	1.72796	0.578716	0.0994846	0.0558776	3.31478
VRN5	97	97	13	R3	2	E8	37 FP2	1.89408	1.901	1.88665	1.74972	1.89907	4.48e-06	3e-06	4.06e-06	1.12e-07	2e-06	3.67e-06		1.22326	0.817488	1.10735	0.0304279	0.546636	1.06512	0.93886	1.2439	0.0541089	0.234938	1.14847	0.870724	0.890221	0.562346	2.32672
FCAF	97	97	13	R3	2	D8	37 FP2	1.89408	1.901	1.88665	1.74972	1.89907	2.42e-06	1.45e-06	2.25e-07	6.57e-09	1.1e-06	1.87e-06		1.29192	0.774042	0.120294	0.00350513	0.58717	1.06512	0.93886	1.2439	0.0541089	0.234938	1.21293	0.824448	0.0967067	0.0647791	2.49925
BRON	97	97	13	R2	1	F10	43 FP3	1.92215	1.89058	1.89853	1.73018	1.87335	4.9e-06	1.26e-06	6.81e-07	1.75e-08	2.5e-06	2.49e-06		1.96996	0.507624	0.273666	0.00701601	1.0068	0.93755	1.06661	1.44035	0.0976499	0.270031	2.10118	0.475923	0.19	0.0718487	3.72848
SDG8	97	97	13	R2	1	H9	43 FP3	1.92215	1.89058	1.89853	1.73018	1.87335	1.23e-06	3.25e-07	3.34e-08	9.59e-10	1.56e-07	6.34e-07		1.94796	0.513357	0.052712	0.00151275	0.246196	0.93755	1.06661	1.44035	0.0976499	0.270031	2.07772	0.481298	0.0365968	0.0154916	0.911735
COL	97	97	13	R2	1	C12	43 FP3	1.92215	1.89058	1.89853	1.73018	1.87335	3.71e-06	1.01e-06	7.2e-10	3.09e-10	6.72e-07	1.94e-06		1.9158	0.521975	0.000371888	0.000159413	0.347082	0.93755	1.06661	1.44035	0.0976499	0.270031	2.04341	0.489377	0.000258193	0.0016325	1.28534
BRO	97	97	13	R2	1	B11	43 FP3	1.92215	1.89058	1.89853	1.73018	1.87335	3.86e-06	1.1e-06	4.13e-07	1e-08	1.6e-06	2.06e-06		1.87817	0.532434	0.200719	0.00488311	0.778882	0.93755	1.06661	1.44035	0.0976499	0.270031	2.00327	0.499183	0.139355	0.0500063	2.88442
EDI	97	97	13	R2	1	G12	43 FP3	1.92215	1.89058	1.89853	1.73018	1.87335	3.83e-06	1.34e-06	1.08e-07	1.91e-09	1e-06	2.27e-06		1.69101	0.591361	0.0476775	0.00084303	0.443235	0.93755	1.06661	1.44035	0.0976499	0.270031	1.80365	0.554431	0.0331015	0.00863319	1.64143
SF2	132	132	14	R1	2	E3	43 FP1	1.90691	1.88404	1.88879	1.70696	1.85024	1.81e-06	9.37e-07	1.88e-08	7.32e-10	1.31e-06	1.3e-06		1.39147	0.718663	0.0144346	0.000561426	1.00644	1.22907	0.813622	1.60415	0.120469	0.387149	1.13213	0.883288	0.0089983	0.00466032	2.59961
VIN3-1	97	97	13	R2	1	D12	43 FP3	1.92215	1.89058	1.89853	1.73018	1.87335	2.11e-06	6.38e-07	7.53e-07	1.08e-08	1.28e-08	1.16e-06		1.81721	0.550295	0.650369	0.00930813	0.0110079	0.93755	1.06661	1.44035	0.0976499	0.270031	1.93825	0.515929	0.451537	0.0953215	0.0407653
FLDF	97	97	13	R2	1	B12	43 FP3	1.92215	1.89058	1.89853	1.73018	1.87335	1.15e-06	5.07e-07	4.54e-08	9.28e-10	3.85e-07	7.62e-07		1.50365	0.665049	0.0595722	0.00121756	0.505431	0.93755	1.06661	1.44035	0.0976499	0.270031	1.60381	0.623516	0.0413596	0.0124686	1.87176
VAR	97	97	13	R2	1	H12	43 FP3	1.92215	1.89058	1.89853	1.73018	1.87335	4.22e-06	1.4e-06	9.43e-07	3.11e-08	1.35e-06	2.43e-06		1.73644	0.575889	0.388065	0.0128166	0.555109	0.93755	1.06661	1.44035	0.0976499	0.270031	1.85211	0.539925	0.269425	0.13125	2.05573
VIN3	132	132	14	R1	2	D3	43 FP1	1.90691	1.88404	1.88879	1.70696	1.85024	1.2e-06	5.08e-07	3.82e-07	9.14e-09	3.94e-09	7.81e-07		1.53836	0.650043	0.489707	0.011706	0.00504269	1.22907	0.813622	1.60415	0.120469	0.387149	1.25164	0.798949	0.305275	0.0971699	0.0130252
FVEF	97	97	13	R2	1	D11	43 FP3	1.92215	1.89058	1.89853	1.73018	1.87335	6.91e-07	3.52e-07	6.14e-08	5.97e-10	2.83e-07	4.93e-07		1.40052	0.714023	0.124357	0.00120903	0.573874	0.93755	1.06661	1.44035	0.0976499	0.270031	1.4938	0.669432	0.0863384	0.0123812	2.12522
FCAF	97	97	13	R2	1	E11	43 FP3	1.92215	1.89058	1.89853	1.73018	1.87335	2.04e-06	1.09e-06	3.46e-07	3.98e-09	7.89e-07	1.49e-06		1.37208	0.728822	0.232265	0.00267237	0.529819	0.93755	1.06661	1.44035	0.0976499	0.270031	1.46347	0.683306	0.161256	0.0273668	1.96207
NDX	97	97	13	R2	1	E9	43 FP3	1.92215	1.89058	1.89853	1.73018	1.87335	2.94e-06	7.98e-07	1.49e-07	4.47e-09	1.88e-06	1.53e-06		1.92085	0.520604	0.0974777	0.00291543	1.22703	0.93755	1.06661	1.44035	0.0976499	0.270031	2.04879	0.488092	0.0676766	0.0298559	4.54403
VRN5	97	97	13	R2	1	G11	43 FP3	1.92215	1.89058	1.89853	1.73018	1.87335	7.64e-07	5.24e-07	1.19e-06	4.13e-08	6.87e-07	6.33e-07		1.20828	0.827621	1.87607	0.0653483	1.08545	0.93755	1.06661	1.44035	0.0976499	0.270031	1.28877	0.775935	1.30251	0.669211	4.01971
NIL1	97	97	13	R2	1	C11	43 FP3	1.92215	1.89058	1.89853	1.73018	1.87335	2.18e-06	1.13e-06	4.51e-07	4.81e-09	8.25e-07	1.57e-06		1.38753	0.720706	0.287488	0.00306413	0.525871	0.93755	1.06661	1.44035	0.0976499	0.270031	1.47995	0.675698	0.199597	0.0313788	1.94745
VARN	97	97	13	R2	1	E10	43 FP3	1.92215	1.89058	1.89853	1.73018	1.87335	4.14e-06	1.21e-06	5.29e-07	1.04e-08	2.27e-06	2.24e-06		1.84942	0.540711	0.236313	0.00464156	1.01474	0.93755	1.06661	1.44035	0.0976499	0.270031	1.97261	0.506943	0.164067	0.0475327	3.75788
ULLN	97	97	13	R2	1	G9	43 FP3	1.92215	1.89058	1.89853	1.73018	1.87335	5.1e-06	1.28e-06	3.73e-07	8.95e-09	1.97e-06	2.55e-06		1.9995	0.500124	0.146054	0.00350589	0.77366	0.93755	1.06661	1.44035	0.0976499	0.270031	2.13269	0.468891	0.101402	0.0359027	2.86508
ULL	97	97	13	R2	1	B9	43 FP3	1.92215	1.89058	1.89853	1.73018	1.87335	4.28e-06	1.67e-06	1.13e-06	3.12e-08	2.01e-06	2.68e-06		1.60105	0.62459	0.421943	0.011657	0.751037	0.93755	1.06661	1.44035	0.0976499	0.270031	1.7077	0.585584	0.292946	0.119376	2.7813
VRN2	97	97	13	R2	1	H11	43 FP3	1.92215	1.89058	1.89853	1.73018	1.87335	2.71e-06	1.6e-06	1.51e-06	3.73e-08	1.35e-06	2.08e-06		1.30279	0.767582	0.7238	0.017905	0.646773	0.93755	1.06661	1.44035	0.0976499	0.270031	1.38957	0.719646	0.502518	0.183359	2.39518
LHP	97	97	13	R2	1	D9	43 FP3	1.92215	1.89058	1.89853	1.73018	1.87335	1.12e-06	2.97e-07	1.32e-07	3.48e-09	5.01e-07	5.76e-07		1.93901	0.515726	0.229521	0.00603819	0.869539	0.93755	1.06661	1.44035	0.0976499	0.270031	2.06817	0.483519	0.159351	0.0618351	3.22015
EDIN	97	97	13	R2	1	F9	43 FP3	1.92215	1.89058	1.89853	1.73018	1.87335	2.42e-06	5.65e-07	1.53e-07	3.94e-09	1.25e-06	1.17e-06		2.06754	0.483666	0.130527	0.00337132	1.06797	0.93755	1.06661	1.44035	0.0976499	0.270031	2.20526	0.453461	0.0906221	0.0345246	3.95501
VAL	97	97	13	R2	1	F12	43 FP3	1.92215	1.89058	1.89853	1.73018	1.87335	3.71e-06	1.15e-06	4.16e-07	5.44e-09	1.43e-06	2.06e-06		1.7983	0.556081	0.201716	0.00263743	0.695083	0.93755	1.06661	1.44035	0.0976499	0.270031	1.91808	0.521354	0.140047	0.027009	2.57409
LOV	97	97	13	R2	1	E12	43 FP3	1.92215	1.89058	1.89853	1.73018	1.87335	3.27e-06	1.01e-06	4.29e-07	6.38e-09	1.58e-06	1.82e-06		1.80275	0.554708	0.23609	0.00351405	0.870142	0.93755	1.06661	1.44035	0.0976499	0.270031	1.92283	0.520067	0.163912	0.0359862	3.22238
NIL2	97	97	13	R2	1	C9	43 FP3	1.92215	1.89058	1.89853	1.73018	1.87335	2.69e-06	9.45e-07	5.42e-07	1.11e-08	1.14e-06	1.6e-06		1.6878	0.592487	0.339871	0.00693631	0.717042	0.93755	1.06661	1.44035	0.0976499	0.270031	1.80023	0.555486	0.235965	0.0710324	2.65541
EDI	97	97	13	R2	2	C3	44 FP1	1.93455	1.89655	1.90875	1.77613	1.89321	4.27e-06	1.87e-06	1.3e-07	1.11e-09	8.78e-07	2.82e-06		1.51346	0.660737	0.0459956	0.000392762	0.311137	0.951411	1.05107	1.41709	0.0384577	0.224735	1.59076	0.628632	0.0324578	0.0102128	1.38446
VAR	97	97	13	R2	2	E4	44 FP1	1.93455	1.89655	1.90875	1.77613	1.89321	2.33e-06	2.3e-06	1.58e-06	2.87e-08	1.06e-06	2.32e-06		1.00648	0.993565	0.683388	0.0123681	0.459273	0.951411	1.05107	1.41709	0.0384577	0.224735	1.05788	0.945289	0.482247	0.321603	2.04362
COL	97	97	13	R2	2	C2	44 FP1	1.93455	1.89655	1.90875	1.77613	1.89321	5.6e-06	1.66e-06	1.29e-09	2.28e-10	1.51e-06	3.05e-06		1.83501	0.544956	0.000423118	7.46e-05	0.494308	0.951411	1.05107	1.41709	0.0384577	0.224735	1.92873	0.518477	0.000298582	0.00193971	2.19951
EDIN	97	97	13	R2	2	G3	44 FP1	1.93455	1.89655	1.90875	1.77613	1.89321	5.17e-06	1.84e-06	1.19e-07	1.04e-09	1.23e-06	3.08e-06		1.67698	0.596311	0.0384731	0.000336995	0.398106	0.951411	1.05107	1.41709	0.0384577	0.224735	1.76262	0.567337	0.0271493	0.00876276	1.77145
FCAF	97	97	13	R2	2	H4	44 FP1	1.93455	1.89655	1.90875	1.77613	1.89321	3.36e-06	3.51e-06	2.13e-07	1.35e-09	1.28e-06	3.43e-06		0.977752	1.02275	0.0620604	0.000394681	0.37376	0.951411	1.05107	1.41709	0.0384577	0.224735	1.02769	0.973059	0.0437942	0.0102627	1.66311
SDG8	97	97	13	R2	2	F3	44 FP1	1.93455	1.89655	1.90875	1.77613	1.89321	1.13e-06	6.07e-07	5.87e-09	7.34e-11	9.07e-08	8.29e-07		1.36514	0.732527	0.00708676	8.86e-05	0.109444	0.951411	1.05107	1.41709	0.0384577	0.224735	1.43486	0.696934	0.00500092	0.0023045	0.486988
BRON	97	97	13	R2	2	C1	44 FP1	1.93455	1.89655	1.90875	1.77613	1.89321	1.72e-06	7.91e-07	1.71e-07	1.59e-09	7.45e-07	1.17e-06		1.47404	0.678408	0.146886	0.00136515	0.638373	0.951411	1.05107	1.41709	0.0384577	0.224735	1.54932	0.645445	0.103653	0.0354975	2.84056
VRN5	97	97	13	R2	2	H3	44 FP1	1.93455	1.89655	1.90875	1.77613	1.89321	5.1e-06	3.65e-06	3.98e-06	7.07e-08	2.27e-06	4.31e-06		1.18163	0.846285	0.922345	0.0163983	0.526448	0.951411	1.05107	1.41709	0.0384577	0.224735	1.24198	0.805165	0.650872	0.426399	2.34252
VIN3-1	97	97	13	R2	2	B3	44 FP1	1.93455	1.89655	1.90875	1.77613	1.89321	4.15e-06	1.96e-06	1.5e-06	2.65e-08	8.02e-09	2.85e-06		1.45407	0.687723	0.52623	0.00928321	0.00281215	0.951411	1.05107	1.41709	0.0384577	0.224735	1.52833	0.654307	0.371345	0.241388	0.0125131
VARN	97	97	13	R2	2	C4	44 FP1	1.93455	1.89655	1.90875	1.77613	1.89321	2.14e-06	1.62e-06	3.7e-07	4.15e-09	8.22e-07	1.86e-06		1.14731	0.871607	0.198499	0.00223052	0.441491	0.951411	1.05107	1.41709	0.0384577	0.224735	1.2059	0.829256	0.140075	0.0579994	1.96449
LHP	97	97	13	R2	2	B2	44 FP1	1.93455	1.89655	1.90875	1.77613	1.89321	3.94e-06	1.36e-06	2.27e-07	2.27e-09	1.09e-06	2.31e-06		1.70162	0.587676	0.0980907	0.000982052	0.471844	0.951411	1.05107	1.41709	0.0384577	0.224735	1.78852	0.559121	0.0692198	0.0255359	2.09956
BRO	97	97	13	R2	2	G1	44 FP1	1.93455	1.89655	1.90875	1.77613	1.89321	8.57e-06	1e-06	1.13e-06	3.02e-08	4.8e-06	2.93e-06		2.92777	0.341557	0.386965	0.0103056	1.63912	0.951411	1.05107	1.41709	0.0384577	0.224735	3.07729	0.324962	0.27307	0.267973	7.29356
FLDF	97	97	13	R2	2	F4	44 FP1	1.93455	1.89655	1.90875	1.77613	1.89321	2.04e-06	2.25e-06	1.77e-07	1.95e-09	1.16e-06	2.14e-06		0.953585	1.04867	0.0827354	0.00091076	0.539897	0.951411	1.05107	1.41709	0.0384577	0.224735	1.00229	0.99772	0.058384	0.0236821	2.40237
LOV	97	97	13	R2	2	E1	44 FP1	1.93455	1.89655	1.90875	1.77613	1.89321	2.79e-06	9.47e-07	2.72e-07	7.54e-09	1.97e-06	1.62e-06		1.71589	0.582788	0.167171	0.0046436	1.21337	0.951411	1.05107	1.41709	0.0384577	0.224735	1.80352	0.554471	0.117968	0.120746	5.3991
FVEF	97	97	13	R2	2	B4	44 FP1	1.93455	1.89655	1.90875	1.77613	1.89321	4.62e-06	3.31e-06	4.89e-07	5.43e-09	1.84e-06	3.91e-06		1.18184	0.846138	0.125187	0.00138999	0.47048	0.951411	1.05107	1.41709	0.0384577	0.224735	1.2422	0.805025	0.088341	0.0361435	2.09349
VRN2	97	97	13	R2	2	B1	44 FP1	1.93455	1.89655	1.90875	1.77613	1.89321	3.21e-06	1.09e-06	1.14e-06	2.24e-08	1.52e-06	1.87e-06		1.71754	0.582228	0.6081	0.0119906	0.812171	0.951411	1.05107	1.41709	0.0384577	0.224735	1.80526	0.553938	0.429119	0.311786	3.6139
NIL1	97	97	13	R2	2	D3	44 FP1	1.93455	1.89655	1.90875	1.77613	1.89321	4.36e-06	1.8e-06	6.25e-07	5.26e-09	1.09e-06	2.8e-06		1.55682	0.642334	0.223261	0.0018797	0.390943	0.951411	1.05107	1.41709	0.0384577	0.224735	1.63633	0.611123	0.157549	0.0488772	1.73957
SF2	132	132	14	R3	1	F3	43 FP1	1.90691	1.88404	1.88879	1.70696	1.85024	4.61e-06	2.93e-06	2.75e-08	1.99e-09	2.91e-06	3.67e-06		1.25431	0.79725	0.00749394	0.000541654	0.791503	1.22907	0.813622	1.60415	0.120469	0.387149	1.02054	0.979877	0.0046716	0.0044962	2.04444
ULL	97	97	13	R2	2	D1	44 FP1	1.93455	1.89655	1.90875	1.77613	1.89321	2.41e-06	9.2e-07	3.06e-07	7.76e-09	1.06e-06	1.49e-06		1.61724	0.618339	0.20547	0.00521691	0.71416	0.951411	1.05107	1.41709	0.0384577	0.224735	1.69983	0.588295	0.144994	0.135653	3.17778
VIN3	132	132	14	R3	1	G3	43 FP1	1.90691	1.88404	1.88879	1.70696	1.85024	4.23e-06	2.68e-06	2.3e-06	8.59e-08	8.82e-09	3.36e-06		1.25603	0.79616	0.683009	0.0255313	0.00262149	1.22907	0.813622	1.60415	0.120469	0.387149	1.02193	0.978538	0.425777	0.211932	0.00677125
NIL2	97	97	13	R2	2	G2	44 FP1	1.93455	1.89655	1.90875	1.77613	1.89321	4.23e-06	1.11e-06	2.33e-07	3.14e-09	1.06e-06	2.17e-06		1.94864	0.51318	0.107225	0.00144771	0.489312	0.951411	1.05107	1.41709	0.0384577	0.224735	2.04815	0.488245	0.0756655	0.0376443	2.17728
ULLN	97	97	13	R2	2	G4	44 FP1	1.93455	1.89655	1.90875	1.77613	1.89321	3.02e-06	2.54e-06	5.86e-07	5.54e-09	1.56e-06	2.77e-06		1.09078	0.916776	0.21176	0.0020045	0.564823	0.951411	1.05107	1.41709	0.0384577	0.224735	1.14649	0.872231	0.149433	0.0521221	2.51328
NDX	97	97	13	R2	2	E2	44 FP1	1.93455	1.89655	1.90875	1.77613	1.89321	2.57e-06	1.5e-06	8.51e-08	1.14e-09	1.66e-06	1.96e-06		1.30797	0.764545	0.0433298	0.000582203	0.843494	0.951411	1.05107	1.41709	0.0384577	0.224735	1.37477	0.727397	0.0305766	0.0151388	3.75328

## Sheet: Norwich_16_48hrs_Fig_S3-3
Gen	Series	TimeofDay	Day in sequence	Rep	tissueCode	plateCode	UBC_N0	PP2A_N0	FLC_N0	UNF_N0	VIN3_N0	CCA1_N0	geoMean	Flag	UBC	PP2A	FLC	UNF	VIN3	CCA1	UBC_plCtrl	PP2A_plCtrl	FLC_plCtrl	UNF_plCtrl	VIN3_plCtrl	CCA1_pltCt	UBC_plateCorrected	PP2A_plateCorrected	FLC_plateCorrected	UNF_plateCorrected	VIN3_plateCorrected	CCA1_plateCorrected
CF	481	1	1	2	H1	45 FP1	8.85735e-07	1.05733e-06	1.54872e-06	2.13663e-08	3.32645e-09	2.62402e-07	9.67738e-07		0.915264	1.09258	1.60035	0.0220786	0.00343734	0.271149	0.74326	1.34542	1.8442	0.0610575	0.384323	0.0144313	1.23142	0.812072	0.867775	0.361604	0.00894391	18.789
CF	481	1	1	1	H2	45 FP1	1.03703e-06	1.29532e-06	2.31802e-06	2.82377e-08	6.78113e-09	4.54762e-07	1.159e-06		0.894763	1.11761	2.00001	0.0243638	0.00585082	0.392373	0.74326	1.34542	1.8442	0.0610575	0.384323	0.0144313	1.20383	0.830679	1.08448	0.39903	0.0152237	27.189
CF	481	1	1	3	C8	45 FP2	8.74841e-07	1.0352e-06	1.55074e-06	2.15637e-08	2.50971e-09	2.80168e-07	9.51651e-07		0.919288	1.0878	1.62953	0.0226592	0.00263722	0.294402	0.798398	1.25251	1.39492	0.0601386	0.379958	0.0144396	1.15142	0.868496	1.16819	0.376783	0.00694082	20.3885
VAR	481	1	1	1	F2	046 FP1	1.98572e-06	1.25053e-06			3.41543e-09	2.50948e-07	1.57582e-06		1.26012	0.793575			0.0021674	0.159249	0.861031	1.1614			0.258767	0.0153003	1.4635	0.683292			0.00837587	10.4082
VAR	481	1	1	3	E11	046 FP3	4.53138e-06	8.57758e-07	3.27676e-06	1.07519e-07	5.70054e-07	1.36571e-06	1.9715e-06		2.29844	0.435078	1.66206	0.0545367	0.289147	0.692725	0.949281	1.05343	1.34601	0.0571498	0.301703	0.016402	2.42124	0.413011	1.23481	0.954276	0.958381	42.2342
VAR	481	1	1	2	F11	046 FP3	9.43e-06	7.46994e-07	1.4023e-05	8.95826e-08	7.68931e-08	1.60849e-07	2.65408e-06		3.55302	0.281451	5.28355	0.0337527	0.0289717	0.0606045	0.949281	1.05343	1.34601	0.0571498	0.301703	0.016402	3.74285	0.267176	3.92536	0.590601	0.096027	3.69495
CF	482	1	1	3	C1	45 FP1	5.29373e-07	1.017e-06	3.46403e-07	6.30425e-09	6.70985e-08	5.82034e-06	7.33739e-07		0.721473	1.38605	0.472106	0.00859194	0.0914473	7.93244	0.74326	1.34542	1.8442	0.0610575	0.384323	0.0144313	0.970687	1.0302	0.255995	0.140719	0.237944	549.669
CF	482	1	1	2	G5	45 FP2	1.21355e-06	1.38144e-06	5.14916e-07	4.64015e-09	8.85122e-08	3.75141e-06	1.29478e-06		0.937268	1.06693	0.397688	0.00358375	0.068361	2.89735	0.798398	1.25251	1.39492	0.0601386	0.379958	0.0144396	1.17394	0.851836	0.285097	0.0595915	0.179917	200.653
CF	482	1	1	1	G6	45 FP2	9.17656e-07	1.28589e-06	4.00329e-07	5.51901e-09	9.17588e-08	4.97978e-06	1.08628e-06		0.84477	1.18375	0.368532	0.00508065	0.0844707	4.58425	0.798398	1.25251	1.39492	0.0601386	0.379958	0.0144396	1.05808	0.945107	0.264196	0.0844824	0.222316	317.478
VAR	482	1	1	2	E2	046 FP1	2.92881e-06	1.59197e-06			7.55289e-08	1.78248e-06	2.1593e-06		1.35637	0.737263			0.0349784	0.825488	0.861031	1.1614			0.258767	0.0153003	1.57528	0.634806			0.135173	53.9523
VAR	482	1	1	1	H8	046 FP2	3.76474e-06	9.80423e-07	4.49112e-06	1.19813e-07	8.74941e-08	1.69587e-06	1.92121e-06		1.95957	0.510316	2.33765	0.0623632	0.0455412	0.882712	0.997	1.00301	1.24464	0.0654053	0.303625	0.015432	1.96547	0.508785	1.87817	0.953489	0.149992	57.2
VAR	482	1	1	3	B10	046 FP3	4.99106e-06	1.56117e-06	1.00661e-05	1.54449e-07	1.13994e-06	2.10596e-06	2.7914e-06		1.78801	0.55928	3.60612	0.0553305	0.408377	0.754447	0.949281	1.05343	1.34601	0.0571498	0.301703	0.016402	1.88355	0.530914	2.67913	0.968166	1.35357	45.9973
CF	481	1	2	1	B2	45 FP1	7.34039e-07	2.01971e-06	1.47508e-06	3.00776e-08	6.09165e-09	4.80685e-07	1.2176e-06		0.602859	1.65876	1.21147	0.0247024	0.00500301	0.394782	0.74326	1.34542	1.8442	0.0610575	0.384323	0.0144313	0.8111	1.23289	0.656906	0.404576	0.0130177	27.3559
CF	481	1	2	2	D1	45 FP1	5.78742e-07	1.02112e-06	1.00404e-06	1.77141e-08	2.44665e-09	4.42127e-07	7.68744e-07		0.752841	1.3283	1.30608	0.0230429	0.00318265	0.575129	0.74326	1.34542	1.8442	0.0610575	0.384323	0.0144313	1.01289	0.987274	0.708209	0.377397	0.0082812	39.8528
CF	481	1	2	3	B8	45 FP2	9.61548e-07	1.35973e-06	1.65387e-06	2.49937e-08	1.94903e-09	1.48421e-05	1.14344e-06		0.840928	1.18916	1.44641	0.0218585	0.00170454	12.9803	0.798398	1.25251	1.39492	0.0601386	0.379958	0.0144396	1.05327	0.949425	1.03691	0.363468	0.00448612	898.936
VAR	481	1	2	1	B8	046 FP2	3.59447e-06	2.22939e-06	2.00673e-05	3.94302e-07	6.04826e-09	2.24007e-07	2.83081e-06		1.26977	0.787546	7.08891	0.13929	0.00213659	0.0791318	0.997	1.00301	1.24464	0.0654053	0.303625	0.015432	1.27359	0.785183	5.69553	2.12964	0.00703693	5.12777
VAR	481	1	2	3	D5	046 FP2	2.11637e-06	5.19463e-07	1.21908e-05	1.64257e-07	2.13546e-09	3.01715e-06	1.04851e-06		2.01845	0.49543	11.6268	0.156658	0.00203666	2.87756	0.997	1.00301	1.24464	0.0654053	0.303625	0.015432	2.02452	0.493943	9.34147	2.39519	0.00670784	186.467
VAR	481	1	2	2	H12	046 FP3	4.44e-06	6.93609e-07	1.92934e-05	3.13003e-07	5.80405e-09	9.80607e-08	1.75488e-06		2.53008	0.395245	10.9941	0.178361	0.00330737	0.0558787	0.949281	1.05343	1.34601	0.0571498	0.301703	0.016402	2.66526	0.375198	8.16797	3.12094	0.0109623	3.40683
CF	482	1	2	1	D2	45 FP1	6.74569e-07	8.96952e-07	6.57961e-07	4.87455e-09	7.65738e-08	4.56067e-06	7.77853e-07		0.867219	1.15311	0.845868	0.00626667	0.0984424	5.86315	0.74326	1.34542	1.8442	0.0610575	0.384323	0.0144313	1.16678	0.857062	0.458663	0.102636	0.256145	406.28
CF	482	1	2	2	G4	45 FP1	1.09245e-06	9.01157e-07	4.94012e-07	5.19706e-09	8.63094e-08	3.27684e-06	9.92205e-07		1.10103	0.908237	0.497893	0.00523789	0.0869875	3.30259	0.74326	1.34542	1.8442	0.0610575	0.384323	0.0144313	1.48136	0.675057	0.269977	0.0857861	0.22634	228.849
CF	482	1	2	3	H4	45 FP1	1.03587e-06	8.75137e-07	5.52972e-07	1.00302e-08	1.21128e-07	3.06515e-06	9.52116e-07		1.08796	0.919149	0.580782	0.0105347	0.12722	3.2193	0.74326	1.34542	1.8442	0.0610575	0.384323	0.0144313	1.46377	0.683167	0.314923	0.172537	0.331025	223.078
VAR	482	1	2	3	C5	046 FP2	4.54764e-06	6.65917e-07	8.09763e-06	8.50592e-08	6.96117e-08	1.09133e-06	1.74022e-06		2.61326	0.382663	4.65324	0.0488785	0.0400018	0.627124	0.997	1.00301	1.24464	0.0654053	0.303625	0.015432	2.62113	0.381515	3.73861	0.747318	0.131747	40.6379
VAR	482	1	2	1	D8	046 FP2	3.03909e-06	1.44731e-06	5.70645e-06	8.92361e-08	1.23392e-07	2.14415e-06	2.09726e-06		1.44907	0.690096	2.7209	0.0425488	0.0588348	1.02235	0.997	1.00301	1.24464	0.0654053	0.303625	0.015432	1.45344	0.688025	2.18609	0.650542	0.193775	66.2489
VAR	482	1	2	2	B9	046 FP3	3.228e-06	1.099e-06	6.07891e-06	5.28075e-08	6.24391e-08	2.18483e-06	1.8835e-06		1.71383	0.583488	3.22745	0.0280369	0.0331506	1.15999	0.949281	1.05343	1.34601	0.0571498	0.301703	0.016402	1.8054	0.553894	2.3978	0.490587	0.109878	70.7223
CF	481	5	1	1	E2	45 FP1	4.85481e-07	1.01322e-06	1.22728e-06	1.47431e-08	1.52249e-09	1.44779e-05	7.01355e-07		0.692205	1.44466	1.74987	0.0210209	0.00217078	20.6427	0.74326	1.34542	1.8442	0.0610575	0.384323	0.0144313	0.931309	1.07376	0.948846	0.344281	0.00564832	1430.41
CF	481	5	1	3	G1	45 FP1	8.30834e-07	8.87556e-07	1.55859e-06	1.59143e-08	1.01614e-09	1.18958e-05	8.58727e-07		0.967518	1.03357	1.81501	0.0185324	0.00118331	13.8529	0.74326	1.34542	1.8442	0.0610575	0.384323	0.0144313	1.30172	0.768213	0.984167	0.303524	0.00307894	959.917
CF	481	5	1	2	H6	45 FP2	9.29712e-07	1.66061e-06	1.08646e-06	1.97991e-08	1.73116e-09	1.84011e-05	1.24253e-06		0.748239	1.33647	0.874387	0.0159344	0.00139325	14.8093	0.798398	1.25251	1.39492	0.0601386	0.379958	0.0144396	0.937175	1.06704	0.626836	0.264962	0.00366684	1025.6
VAR	481	5	1	1	C1	046 FP1	2.44607e-06	1.22306e-06			6.97814e-09	7.23e-06	1.72965e-06		1.4142	0.707115			0.00403442	4.18003	0.861031	1.1614			0.258767	0.0153003	1.64245	0.608848			0.0155909	273.199
VAR	481	5	1	3	D2	046 FP1	1.42822e-06	9.76881e-07			1.79944e-09	6.32471e-06	1.18119e-06		1.20914	0.827034			0.00152342	5.35454	0.861031	1.1614			0.258767	0.0153003	1.40429	0.712102			0.00588721	349.962
VAR	481	5	1	2	D9	046 FP3	4.17878e-06	1.48001e-06	1.48218e-05	2.42952e-07	1.24398e-09	5.85462e-06	2.48689e-06		1.68032	0.595125	5.95996	0.0976928	0.000500214	2.35419	0.949281	1.05343	1.34601	0.0571498	0.301703	0.016402	1.7701	0.564941	4.42789	1.70942	0.00165797	143.531
CF	482	5	1	1	F3	45 FP1	5.73401e-07	7.34269e-07	4.40516e-07	2.48593e-09	5.92727e-08	9.66157e-06	6.48869e-07		0.883694	1.13161	0.678899	0.00383118	0.0913477	14.8899	0.74326	1.34542	1.8442	0.0610575	0.384323	0.0144313	1.18894	0.841083	0.368126	0.0627471	0.237685	1031.78
CF	482	5	1	3	F6	45 FP2	1.18601e-06	1.8905e-06	7.81421e-07	6.04602e-09	1.06919e-07	2.56215e-05	1.49738e-06		0.792055	1.26254	0.521859	0.00403773	0.0714042	17.1109	0.798398	1.25251	1.39492	0.0601386	0.379958	0.0144396	0.992055	1.00801	0.374113	0.0671405	0.187927	1185
CF	482	5	1	2	F10	45 FP3	4.41591e-07	7.60131e-07	2.8841e-07	4.21971e-09	3.51744e-08	1.43442e-05	5.79368e-07		0.762194	1.312	0.497801	0.0072833	0.0607117	24.7583	0.75437	1.32561	1.66307	0.0738204	0.321585	0.0152364	1.01037	0.989734	0.299327	0.0986624	0.188789	1624.95
VAR	482	5	1	3	G1	046 FP1	3.7295e-06	1.66116e-06			9.38223e-08	8.10258e-06	2.48904e-06		1.49837	0.667392			0.0376942	3.25531	0.861031	1.1614			0.258767	0.0153003	1.7402	0.574645			0.145669	212.761
VAR	482	5	1	1	B7	046 FP2	2.89934e-06	1.00223e-06	1.26551e-05	2.3957e-07	4.21385e-08	5.693e-08	1.70464e-06		1.70085	0.587942	7.4239	0.140539	0.0247198	0.033397	0.997	1.00301	1.24464	0.0654053	0.303625	0.015432	1.70597	0.586178	5.96468	2.14875	0.0814157	2.16414
VAR	482	5	1	2	H10	046 FP3	3.73953e-06	8.07717e-07	1.59037e-05	2.11399e-07	6.75138e-09	5.0661e-06	1.73795e-06		2.15169	0.464752	9.15084	0.121637	0.00388467	2.91498	0.949281	1.05343	1.34601	0.0571498	0.301703	0.016402	2.26665	0.44118	6.79852	2.12838	0.0128758	177.721
CF	481	5	2	1	E8	45 FP2	1.58025e-06	1.03149e-06	1.59348e-06	1.65056e-08	3.62394e-09	1.05894e-05	1.27672e-06		1.23774	0.807921	1.24811	0.0129282	0.00283848	8.29423	0.798398	1.25251	1.39492	0.0601386	0.379958	0.0144396	1.55029	0.645042	0.894752	0.214973	0.00747052	574.409
CF	481	5	2	2	H8	45 FP2	9.1502e-07	9.92975e-07	1.17131e-06	2.29626e-08	2.08575e-09	2.13102e-05	9.53201e-07		0.959945	1.04173	1.22882	0.02409	0.00218816	22.3564	0.798398	1.25251	1.39492	0.0601386	0.379958	0.0144396	1.20234	0.831713	0.880923	0.400575	0.00575894	1548.27
CF	481	5	2	3	B12	45 FP3	9.01588e-07	8.91776e-07	1.88592e-06	5.03777e-08	3.951e-09	2.16363e-07	8.96668e-07		1.00549	0.994544	2.10326	0.0561832	0.00440631	0.241297	0.75437	1.32561	1.66307	0.0738204	0.321585	0.0152364	1.33288	0.750254	1.26468	0.76108	0.0137019	15.8369
VAR	481	5	2	1	G6	046 FP2	1.99344e-06	1.49944e-06	1.19267e-05	3.46364e-07	2.22052e-08	5.03389e-08	1.72889e-06		1.15302	0.867289	6.89847	0.200339	0.0128437	0.0291164	0.997	1.00301	1.24464	0.0654053	0.303625	0.015432	1.15649	0.864687	5.54253	3.06304	0.0423011	1.88675
VAR	481	5	2	2	E12	046 FP3	3.14005e-06	1.75757e-06	1.77414e-05	1.74425e-07	5.12237e-09	5.91833e-06	2.34922e-06		1.33663	0.748149	7.55204	0.0742481	0.00218045	2.51927	0.949281	1.05343	1.34601	0.0571498	0.301703	0.016402	1.40805	0.710203	5.61071	1.29918	0.00722714	153.596
VAR	481	5	2	3	F12	046 FP3	2.82701e-06	1.12155e-06	1.40703e-05	1.56378e-07	3.4691e-09	7.15736e-08	1.78063e-06		1.58765	0.629862	7.90186	0.0878216	0.00194825	0.0401958	0.949281	1.05343	1.34601	0.0571498	0.301703	0.016402	1.67248	0.597916	5.8706	1.53669	0.0064575	2.45067
CF	482	5	2	2	E4	45 FP1	1.18314e-06	1.22308e-06	7.01227e-07	5.80816e-09	9.52673e-08	1.6103e-05	1.20294e-06		0.983534	1.01674	0.582925	0.00482829	0.0791951	13.3864	0.74326	1.34542	1.8442	0.0610575	0.384323	0.0144313	1.32327	0.755704	0.316085	0.0790777	0.206064	927.591
CF	482	5	2	1	D12	45 FP3	9.25306e-07	7.41811e-07	3.48141e-07	4.86645e-09	1.094e-07	8.71303e-06	8.28494e-07		1.11685	0.895373	0.420209	0.00587385	0.132047	10.5167	0.75437	1.32561	1.66307	0.0738204	0.321585	0.0152364	1.48051	0.675442	0.252671	0.0795694	0.410614	690.238
CF	482	5	2	3	F12	45 FP3	7.36203e-07	5.45592e-07	2.67234e-07	2.9694e-09	4.35733e-08	1.4123e-05	6.33772e-07		1.16162	0.860866	0.421657	0.00468528	0.0687524	22.2841	0.75437	1.32561	1.66307	0.0738204	0.321585	0.0152364	1.53986	0.649411	0.253542	0.0634687	0.213793	1462.56
VAR	482	5	2	1	F4	046 FP1	2.93095e-06	3.52315e-07			3.59876e-08	2.39327e-06	1.01618e-06		2.88429	0.346706			0.0354146	2.35517	0.861031	1.1614			0.258767	0.0153003	3.34981	0.298525			0.136859	153.929
VAR	482	5	2	3	C7	046 FP2	2.35586e-06	1.11579e-06	1.4072e-05	2.10608e-07	2.79081e-09	7.63961e-06	1.62131e-06		1.45306	0.688203	8.67943	0.1299	0.00172133	4.71199	0.997	1.00301	1.24464	0.0654053	0.303625	0.015432	1.45743	0.686138	6.97342	1.98608	0.00566928	305.339
VAR	482	5	2	2	C10	046 FP3	4.03351e-06	1.17613e-06	5.67394e-06	8.62354e-08	1.05887e-06	1.98646e-06	2.17805e-06		1.85189	0.53999	2.60505	0.0395929	0.486153	0.912032	0.949281	1.05343	1.34601	0.0571498	0.301703	0.016402	1.95083	0.512602	1.9354	0.692791	1.61136	55.605
CF	481	9	1	3	E3	45 FP1	6.01309e-07	7.43195e-07	9.51189e-07	1.12481e-08	3.53978e-09	1.4952e-05	6.68498e-07		0.899493	1.11174	1.42288	0.0168259	0.00529512	22.3666	0.74326	1.34542	1.8442	0.0610575	0.384323	0.0144313	1.2102	0.826311	0.771539	0.275574	0.0137778	1549.87
CF	481	9	1	1	F4	45 FP1	8.51238e-07	8.90629e-07	1.76209e-06	2.30317e-08	8.77704e-09	1.24332e-05	8.7071e-07		0.977636	1.02288	2.02373	0.0264516	0.0100803	14.2793	0.74326	1.34542	1.8442	0.0610575	0.384323	0.0144313	1.31533	0.760263	1.09735	0.433225	0.0262288	989.469
CF	481	9	1	1	B6	45 FP2	7.85079e-07	1.77397e-06	1.88144e-06	2.31562e-08	2.85855e-09	2.42625e-05	1.18013e-06		0.665248	1.5032	1.59427	0.0196217	0.00242223	20.5592	0.798398	1.25251	1.39492	0.0601386	0.379958	0.0144396	0.833228	1.20015	1.14291	0.326275	0.00637499	1423.81
VAR	481	9	1	1	H3	046 FP1	1.97561e-07	4.85053e-08			1.72257e-09	8.98459e-07	9.78915e-08		2.01816	0.4955			0.0175967	9.1781	0.861031	1.1614			0.258767	0.0153003	2.34389	0.426641			0.0680022	599.863
VAR	481	9	1	3	C6	046 FP2	4.00979e-06	1.37739e-06	6.13934e-06	1.67358e-07	1.04413e-07	1.4661e-05	2.35011e-06		1.70621	0.586094	2.61236	0.0712129	0.0444287	6.2384	0.997	1.00301	1.24464	0.0654053	0.303625	0.015432	1.71135	0.584335	2.09888	1.0888	0.146328	404.251
VAR	481	9	1	2	E5	046 FP2	2.82179e-06	6.99435e-07	1.67769e-05	1.81951e-07	4.50561e-09	5.37067e-06	1.40487e-06		2.00858	0.497865	11.942	0.129515	0.00320713	3.82289	0.997	1.00301	1.24464	0.0654053	0.303625	0.015432	2.01462	0.496371	9.59471	1.98019	0.0105628	247.725
CF	482	9	1	2	D6	45 FP2	6.62509e-07	1.35938e-06	3.85539e-07	6.51938e-09	3.67493e-07	1.4277e-05	9.48999e-07		0.698113	1.43243	0.406259	0.00686974	0.387243	15.0443	0.798398	1.25251	1.39492	0.0601386	0.379958	0.0144396	0.874392	1.14365	0.291242	0.114232	1.01917	1041.88
CF	482	9	1	2	H9	45 FP3	4.35411e-07	9.31307e-07	2.27849e-07	3.35477e-09	1.62501e-07	9.01295e-06	6.3679e-07		0.683759	1.4625	0.357808	0.00526825	0.255188	14.1537	0.75437	1.32561	1.66307	0.0738204	0.321585	0.0152364	0.906398	1.10327	0.215149	0.0713658	0.793533	928.945
CF	482	9	1	3	E3	046 FP1	1.95155e-06	9.85877e-07			4.86882e-07	3.12268e-06	1.38708e-06		1.40695	0.710757			0.351012	2.25127	0.861031	1.1614			0.258767	0.0153003	1.63403	0.611984			1.35648	147.138
VAR	482	9	1	3	G9	45 FP3	9.91557e-07	2.2512e-06	1.51078e-06	3.38479e-08	3.43647e-07	2.23519e-05	1.49405e-06		0.663669	1.50678	1.0112	0.0226551	0.23001	14.9605	0.75437	1.32561	1.66307	0.0738204	0.321585	0.0152364	0.879766	1.13667	0.60803	0.306894	0.715238	981.898
VAR	482	9	1	1	D1	046 FP1	3.07994e-06	2.23135e-06			6.48065e-07	1.32679e-05	2.62153e-06		1.17486	0.851162			0.247209	5.06114	0.861031	1.1614			0.258767	0.0153003	1.36449	0.732877			0.955333	330.786
VAR	482	9	1	2	C8	046 FP2	3.45884e-06	1.85017e-06	8.37183e-06	1.40675e-07	6.23379e-07	8.77661e-06	2.52972e-06		1.36729	0.731376	3.30939	0.055609	0.246422	3.4694	0.997	1.00301	1.24464	0.0654053	0.303625	0.015432	1.3714	0.729182	2.65891	0.850221	0.811603	224.819
CF	481	9	2	1	B1	45 FP1	4.48781e-07	1.34564e-06	1.21694e-06	1.52156e-08	5.10113e-09	1.99688e-05	7.7711e-07		0.577501	1.7316	1.56598	0.0195798	0.00656423	25.6962	0.74326	1.34542	1.8442	0.0610575	0.384323	0.0144313	0.776983	1.28703	0.849136	0.320677	0.01708	1780.59
CF	481	9	2	3	G2	45 FP1	7.59671e-07	9.50861e-07	1.39615e-06	2.59906e-08	6.38671e-09	1.61272e-05	8.49907e-07		0.893829	1.11878	1.64271	0.0305806	0.0075146	18.9752	0.74326	1.34542	1.8442	0.0610575	0.384323	0.0144313	1.20258	0.831547	0.890744	0.500849	0.0195529	1314.86
CF	481	9	2	2	E6	45 FP2	9.72919e-07	1.33412e-06	1.46904e-06	2.94935e-08	2.19552e-08	1.9554e-05	1.13929e-06		0.853967	1.171	1.28944	0.0258875	0.0192709	17.1633	0.798398	1.25251	1.39492	0.0601386	0.379958	0.0144396	1.0696	0.934928	0.924379	0.430465	0.0507185	1188.63
VAR	481	9	2	3	B12	046 FP3	1.52751e-06	1.80398e-06	1.83918e-05	2.21869e-07	1.23481e-08	1.17565e-05	1.66e-06		0.920185	1.08674	11.0794	0.133656	0.0074386	7.08224	0.949281	1.05343	1.34601	0.0571498	0.301703	0.016402	0.969349	1.03162	8.23132	2.3387	0.0246553	431.791
VAR	481	9	2	1	D11	046 FP3	4.47307e-06	5.85071e-07	1.63751e-05	1.03126e-07	2.25497e-09	4.70852e-09	1.61773e-06		2.76502	0.361661	10.1223	0.0637474	0.0013939	0.00291057	0.949281	1.05343	1.34601	0.0571498	0.301703	0.016402	2.91275	0.343318	7.52023	1.11544	0.00462011	0.177452
VAR	481	9	2	2	H11	046 FP3	6.85542e-06	4.40868e-07	1.03287e-05	7.19171e-08	2.89737e-08	3.81129e-06	1.73849e-06		3.94333	0.253593	5.94117	0.0413676	0.016666	2.1923	0.949281	1.05343	1.34601	0.0571498	0.301703	0.016402	4.15401	0.240731	4.41393	0.723845	0.0552398	133.661
CF	482	9	2	2	F7	45 FP2	6.91205e-07	1.33662e-06	3.86375e-07	3.45125e-09	2.17297e-07	1.23647e-05	9.61185e-07		0.719118	1.39059	0.401978	0.00359062	0.226072	12.864	0.798398	1.25251	1.39492	0.0601386	0.379958	0.0144396	0.900701	1.11025	0.288173	0.0597057	0.594993	890.885
CF	482	9	2	1	C10	45 FP3	3.78337e-07	8.99322e-07	3.18644e-07	3.95912e-09	2.76339e-07	1.38554e-05	5.83307e-07		0.648607	1.54177	0.546272	0.00678738	0.473745	23.7532	0.75437	1.32561	1.66307	0.0738204	0.321585	0.0152364	0.8598	1.16306	0.328472	0.0919445	1.47316	1558.98
CF	482	9	2	3	H11	45 FP3	7.29838e-07	7.2928e-07	4.06381e-07	6.76551e-09	2.04669e-07	8.71869e-06	7.29559e-07		1.00038	0.999618	0.557023	0.00927342	0.280539	11.9506	0.75437	1.32561	1.66307	0.0738204	0.321585	0.0152364	1.32612	0.754081	0.334937	0.125621	0.872363	784.35
VAR	482	9	2	3	G3	046 FP1	2.80653e-06	1.12696e-06			4.44337e-07	5.75201e-06	1.77844e-06		1.57809	0.633679			0.249847	3.2343	0.861031	1.1614			0.258767	0.0153003	1.83279	0.545617			0.965526	211.387
VAR	482	9	2	2	F5	046 FP2	3.59381e-06	7.63933e-07	1.00076e-05	1.0311e-07	3.07709e-07	6.19079e-06	1.65693e-06		2.16895	0.461052	6.03983	0.0622294	0.18571	3.73629	0.997	1.00301	1.24464	0.0654053	0.303625	0.015432	2.17548	0.459669	4.85266	0.951444	0.611643	242.113
VAR	482	9	2	1	G11	046 FP3	6.26081e-06	3.95989e-07	1.20434e-05	2.29035e-07	2.43554e-07	8.66763e-08	1.57455e-06		3.97625	0.251493	7.64878	0.14546	0.154682	0.0550483	0.949281	1.05343	1.34601	0.0571498	0.301703	0.016402	4.1887	0.238738	5.68258	2.54525	0.512695	3.3562
CF	481	13	1	2	C6	45 FP2	6.52631e-07	1.39559e-06	1.0578e-06	1.78887e-08	4.65216e-09	1.80099e-06	9.54362e-07		0.68384	1.46233	1.10839	0.0187442	0.00487462	1.88711	0.798398	1.25251	1.39492	0.0601386	0.379958	0.0144396	0.856515	1.16752	0.794588	0.311683	0.0128294	130.69
CF	481	13	1	3	E9	45 FP3	3.61655e-07	1.60672e-06	1.12687e-06	2.06646e-08	8.12018e-09	1.26434e-06	7.62286e-07		0.474435	2.10777	1.47828	0.0271087	0.0106524	1.65862	0.75437	1.32561	1.66307	0.0738204	0.321585	0.0152364	0.628915	1.59004	0.888885	0.367225	0.0331247	108.86
CF	481	13	1	1	G12	45 FP3	8.62311e-07	7.39458e-07	8.68851e-07	1.12974e-08	1.26996e-08	1.16894e-06	7.98525e-07		1.07988	0.92603	1.08807	0.0141478	0.0159038	1.46388	0.75437	1.32561	1.66307	0.0738204	0.321585	0.0152364	1.4315	0.698569	0.654254	0.191652	0.0494546	96.0779
VAR	481	13	1	2	F7	046 FP2	3.38347e-06	8.68834e-07	1.35854e-05	2.4109e-07	3.47995e-09	9.42877e-09	1.71455e-06		1.97339	0.506742	7.92363	0.140615	0.00202966	0.00549928	0.997	1.00301	1.24464	0.0654053	0.303625	0.015432	1.97933	0.505222	6.36618	2.1499	0.00668478	0.356355
VAR	481	13	1	1	G8	046 FP2	2.67649e-06	9.28879e-07	1.49272e-05	1.77936e-07	1.63695e-08	5.53323e-07	1.57675e-06		1.69747	0.58911	9.4671	0.11285	0.0103818	0.350926	0.997	1.00301	1.24464	0.0654053	0.303625	0.015432	1.70258	0.587343	7.60627	1.72539	0.034193	22.7402
VAR	481	13	1	3	G12	046 FP3	2.59722e-06	9.51925e-07	1.55738e-05	1.46813e-07	1.08869e-08	4.90874e-07	1.57237e-06		1.65178	0.605406	9.90461	0.0933703	0.00692383	0.312187	0.949281	1.05343	1.34601	0.0571498	0.301703	0.016402	1.74004	0.574701	7.35852	1.63378	0.0229491	19.0335
CF	482	13	1	1	D9	45 FP3	4.76848e-07	1.64549e-06	3.23064e-07	1.95394e-08	9.4199e-07	6.55086e-06	8.85804e-07		0.538322	1.85762	0.364713	0.0220583	1.06343	7.39538	0.75437	1.32561	1.66307	0.0738204	0.321585	0.0152364	0.713605	1.40134	0.219301	0.298811	3.30684	485.377
CF	482	13	1	3	E10	45 FP3	5.20588e-07	1.57072e-06	3.81874e-07	1.65937e-08	4.48362e-07	5.73166e-06	9.04266e-07		0.575703	1.73701	0.422303	0.0183505	0.49583	6.33847	0.75437	1.32561	1.66307	0.0738204	0.321585	0.0152364	0.763157	1.31035	0.25393	0.248583	1.54183	416.009
CF	482	13	1	2	E12	45 FP3	7.95859e-07	1.05974e-06	2.84199e-07	1.35433e-08	3.32856e-07	6.00865e-06	9.18373e-07		0.866598	1.15394	0.309459	0.014747	0.362441	6.54271	0.75437	1.32561	1.66307	0.0738204	0.321585	0.0152364	1.14877	0.870496	0.186077	0.199769	1.12705	429.415
VAR	482	13	1	2	C2	046 FP1	2.10477e-06	1.29687e-06			7.63626e-07	2.16876e-06	1.65215e-06		1.27395	0.784958			0.462201	1.31269	0.861031	1.1614			0.258767	0.0153003	1.47957	0.675873			1.78616	85.7946
VAR	482	13	1	2	D4	046 FP1	2.9351e-06	1.32744e-06			6.29147e-07	1.2938e-06	1.97387e-06		1.48698	0.672505			0.318737	0.655465	0.861031	1.1614			0.258767	0.0153003	1.72697	0.579048			1.23175	42.8399
VAR	482	13	1	3	H2	046 FP1	1.88486e-06	1.0832e-06			4.92739e-07	1.74264e-06	1.42887e-06		1.31912	0.758079			0.344845	1.2196	0.861031	1.1614			0.258767	0.0153003	1.53203	0.65273			1.33265	79.7104
CF	481	13	2	1	B3	45 FP1	6.57286e-07	9.30658e-07	1.48728e-06	2.03536e-08	2.07124e-08	8.17857e-07	7.82118e-07		0.840392	1.18992	1.90161	0.0260237	0.0264825	1.0457	0.74326	1.34542	1.8442	0.0610575	0.384323	0.0144313	1.13068	0.884421	1.03113	0.426216	0.068907	72.4602
CF	481	13	2	3	H7	45 FP2	4.36509e-08	5.04167e-08	4.99483e-08	1.83962e-09	3.08209e-10	3.90432e-08	4.6912e-08		0.930485	1.07471	1.06472	0.0392143	0.00656995	0.832266	0.798398	1.25251	1.39492	0.0601386	0.379958	0.0144396	1.16544	0.858045	0.763285	0.652066	0.0172912	57.6378
CF	481	13	2	2	D10	45 FP3	5.20947e-07	1.29583e-06	1.22286e-06	4.04678e-08	1.24651e-08	9.55255e-07	8.21619e-07		0.634049	1.57716	1.48836	0.0492537	0.0151713	1.16265	0.75437	1.32561	1.66307	0.0738204	0.321585	0.0152364	0.840502	1.18977	0.894946	0.66721	0.0471768	76.3076
VAR	481	13	2	2	B3	046 FP1	2.08746e-06	8.37912e-07			7.41392e-09	2.4921e-07	1.32254e-06		1.57837	0.633563			0.00560583	0.188433	0.861031	1.1614			0.258767	0.0153003	1.83312	0.545518			0.0216636	12.3156
VAR	481	13	2	3	B4	046 FP1	9.29702e-07	6.39033e-07			3.98686e-09	2.06014e-07	7.70786e-07		1.20617	0.829068			0.00517246	0.267278	0.861031	1.1614			0.258767	0.0153003	1.40085	0.713853			0.0199889	17.4688
VAR	481	13	2	2	G2	046 FP1	1.45521e-06	9.36619e-07			1.30093e-08	3.90863e-07	1.16747e-06		1.24647	0.802267			0.0111432	0.334796	0.861031	1.1614			0.258767	0.0153003	1.44765	0.690777			0.0430627	21.8816
CF	482	13	2	3	C5	45 FP2	8.25425e-07	1.16312e-06	5.31708e-07	1.05644e-08	4.31205e-07	4.3946e-06	9.79831e-07		0.842416	1.18706	0.542653	0.0107819	0.440081	4.48506	0.798398	1.25251	1.39492	0.0601386	0.379958	0.0144396	1.05513	0.947748	0.389021	0.179284	1.15824	310.609
CF	482	13	2	1	D7	45 FP2	1.41788e-06	1.99182e-06	7.37095e-07	1.09526e-08	7.15194e-07	4.05825e-06	1.68052e-06		0.843714	1.18524	0.43861	0.00651737	0.425578	2.41487	0.798398	1.25251	1.39492	0.0601386	0.379958	0.0144396	1.05676	0.94629	0.314434	0.108372	1.12007	167.24
CF	482	13	2	2	F11	45 FP3	1.8436e-08	1.90129e-08	1.09163e-08	0	5.747e-09	7.10875e-08	1.87223e-08		0.984713	1.01552	0.583067	0	0.306961	3.79695	0.75437	1.32561	1.66307	0.0738204	0.321585	0.0152364	1.30534	0.766081	0.350597	0	0.954526	249.204
VAR	482	13	2	2	B11	046 FP3	5.9488e-06	3.58805e-07	7.87863e-06	1.47974e-07	3.09373e-08	6.8676e-07	1.46098e-06		4.07179	0.245592	5.39271	0.101284	0.0211758	0.470069	0.949281	1.05343	1.34601	0.0571498	0.301703	0.016402	4.28934	0.233136	4.00646	1.77225	0.0701874	28.6593
VAR	482	13	2	1	C11	046 FP3	6.47474e-06	9.94085e-07	9.15599e-06	1.62806e-07	6.98337e-08	3.62344e-06	2.53701e-06		2.55211	0.391833	3.60896	0.0641725	0.027526	1.42823	0.949281	1.05343	1.34601	0.0571498	0.301703	0.016402	2.68847	0.371959	2.68124	1.12288	0.0912352	87.0767
VAR	482	13	2	3	E9	046 FP3	4.99652e-06	2.00044e-06	9.18406e-06	1.49862e-07	1.3674e-06	2.81614e-06	3.16152e-06		1.58042	0.632745	2.90495	0.0474019	0.432512	0.890753	0.949281	1.05343	1.34601	0.0571498	0.301703	0.016402	1.66486	0.600652	2.1582	0.829432	1.43357	54.3077
CF	481	17	1	2	F8	45 FP2	1.08136e-06	1.02388e-06	1.81036e-06	3.68096e-08	3.6684e-08	4.304e-08	1.05223e-06		1.02769	0.973057	1.7205	0.0349825	0.0348632	0.0409037	0.798398	1.25251	1.39492	0.0601386	0.379958	0.0144396	1.28719	0.776887	1.23341	0.581698	0.0917554	2.83275
CF	481	17	1	3	B10	45 FP3	4.99659e-07	1.32144e-06	1.45493e-06	5.2999e-08	2.52513e-08	3.92531e-08	8.12571e-07		0.614911	1.62625	1.79053	0.0652238	0.0310759	0.0483073	0.75437	1.32561	1.66307	0.0738204	0.321585	0.0152364	0.815132	1.22679	1.07664	0.883548	0.0966335	3.17053
CF	481	17	1	1	H10	45 FP3	6.22573e-07	9.71255e-07	9.53412e-07	3.4419e-08	2.50098e-08	4.83418e-08	7.7761e-07		0.800624	1.24903	1.22608	0.0442625	0.0321624	0.0621672	0.75437	1.32561	1.66307	0.0738204	0.321585	0.0152364	1.06131	0.942228	0.73724	0.599598	0.100012	4.08019
VAR	481	17	1	1	B6	046 FP2	3.50618e-06	1.28598e-06	5.15291e-06	1.41785e-07	1.24222e-07	1.21073e-05	2.12341e-06		1.6512	0.605621	2.42671	0.0667722	0.0585011	5.70179	0.997	1.00301	1.24464	0.0654053	0.303625	0.015432	1.65617	0.603804	1.94972	1.0209	0.192676	369.478
VAR	481	17	1	2	G7	046 FP2	3.32355e-06	7.68899e-07	1.56279e-05	2.33763e-07	4.39693e-09	6.45146e-06	1.59859e-06		2.07906	0.480987	9.77607	0.146231	0.00275051	4.03573	0.997	1.00301	1.24464	0.0654053	0.303625	0.015432	2.08531	0.479544	7.85451	2.23577	0.00905892	261.517
VAR	481	17	1	3	C12	046 FP3	1.46735e-06	1.90785e-06	1.21131e-05	3.47177e-07	2.27904e-08	7.31258e-08	1.67317e-06		0.876991	1.14026	7.23964	0.207497	0.0136211	0.043705	0.949281	1.05343	1.34601	0.0571498	0.301703	0.016402	0.923848	1.08243	5.37861	3.63075	0.0451473	2.66462
CF	482	17	1	1	F2	45 FP1	8.32826e-07	1.08514e-06	5.00364e-07	8.7344e-09	5.70415e-07	6.52417e-07	9.50648e-07		0.876061	1.14147	0.526339	0.00918784	0.600027	0.686287	0.74326	1.34542	1.8442	0.0610575	0.384323	0.0144313	1.17867	0.848411	0.285402	0.150478	1.56126	47.5554
CF	482	17	1	2	H3	45 FP1	1.3121e-06	1.27902e-06	8.35897e-07	1.93357e-08	8.49378e-07	4.97594e-07	1.29545e-06		1.01285	0.987316	0.645255	0.0149258	0.655661	0.384108	0.74326	1.34542	1.8442	0.0610575	0.384323	0.0144313	1.36271	0.733833	0.349882	0.244455	1.70602	26.6163
CF	482	17	1	3	B11	45 FP3	7.63014e-07	9.28152e-07	5.18354e-07	1.20974e-08	4.6805e-07	6.29264e-07	8.41542e-07		0.906686	1.10292	0.615957	0.0143753	0.556182	0.747751	0.75437	1.32561	1.66307	0.0738204	0.321585	0.0152364	1.20191	0.832008	0.370374	0.194733	1.7295	49.0768
VAR	482	17	1	1	H6	046 FP2	2.38829e-06	2.05721e-06	1.23406e-05	2.33949e-07	9.82673e-09	6.36584e-08	2.21658e-06		1.07747	0.928104	5.5674	0.105545	0.00443329	0.0287193	0.997	1.00301	1.24464	0.0654053	0.303625	0.015432	1.08071	0.925319	4.47309	1.61371	0.0146012	1.86102
VAR	482	17	1	3	G9	046 FP3	3.69811e-06	1.59947e-06	6.30905e-06	1.36541e-07	6.12945e-07	4.11583e-07	2.43208e-06		1.52056	0.657654	2.5941	0.0561417	0.252025	0.169231	0.949281	1.05343	1.34601	0.0571498	0.301703	0.016402	1.6018	0.624299	1.92726	0.982361	0.835341	10.3177
VAR	482	17	1	2	G10	046 FP3	6.84884e-06	1.07325e-06	8.34452e-06	6.81003e-08	6.2867e-07	7.62332e-06	2.71118e-06		2.52615	0.395859	3.07782	0.0251184	0.231881	2.81181	0.949281	1.05343	1.34601	0.0571498	0.301703	0.016402	2.66112	0.375782	2.28663	0.439518	0.768572	171.431
CF	481	17	2	1	G3	45 FP1	1.16983e-06	1.50337e-06	1.74124e-06	3.40381e-08	3.18195e-08	5.71728e-08	1.32616e-06		0.882124	1.13363	1.313	0.0256667	0.0239938	0.0431117	0.74326	1.34542	1.8442	0.0610575	0.384323	0.0144313	1.18683	0.84258	0.711961	0.42037	0.0624313	2.98737
CF	481	17	2	3	B7	45 FP2	9.5288e-07	1.67273e-06	1.59912e-06	3.78971e-08	2.78414e-08	4.13361e-08	1.2625e-06		0.754755	1.32493	1.26662	0.0300174	0.0220525	0.0327414	0.798398	1.25251	1.39492	0.0601386	0.379958	0.0144396	0.945336	1.05782	0.908026	0.499137	0.0580393	2.26747
CF	481	17	2	2	G11	45 FP3	7.42875e-07	6.81394e-07	1.0427e-06	1.76422e-08	1.4221e-08	3.3393e-08	7.11471e-07		1.04414	0.957726	1.46556	0.0247968	0.0199882	0.0469352	0.75437	1.32561	1.66307	0.0738204	0.321585	0.0152364	1.38412	0.72248	0.881238	0.335908	0.0621554	3.08047
VAR	481	17	2	1	B5	046 FP2	3.86756e-06	8.47301e-07	1.99451e-05	2.72094e-07	3.71149e-08	2.21009e-08	1.81025e-06		2.13649	0.468058	11.0179	0.150308	0.0205027	0.0122088	0.997	1.00301	1.24464	0.0654053	0.303625	0.015432	2.14292	0.466654	8.85227	2.2981	0.0675265	0.791133
VAR	481	17	2	3	G5	046 FP2	3.34001e-06	8.05952e-07	1.50912e-05	2.84821e-07	3.36867e-08	4.6092e-08	1.6407e-06		2.03573	0.491225	9.19806	0.173598	0.0205319	0.0280929	0.997	1.00301	1.24464	0.0654053	0.303625	0.015432	2.04185	0.489751	7.39012	2.65418	0.0676227	1.82043
VAR	481	17	2	2	F9	046 FP3	3.22111e-06	1.84822e-06	1.43925e-05	3.84192e-07	6.87761e-08	1.01149e-07	2.43995e-06		1.32016	0.757485	5.89868	0.157459	0.0281876	0.0414555	0.949281	1.05343	1.34601	0.0571498	0.301703	0.016402	1.39069	0.719067	4.38236	2.7552	0.0934281	2.52747
CF	482	17	2	3	C2	45 FP1	5.54719e-07	1.33061e-06	5.32568e-07	9.03885e-09	4.05308e-07	5.54929e-07	8.59135e-07		0.645672	1.54878	0.619888	0.0105209	0.471763	0.645916	0.74326	1.34542	1.8442	0.0610575	0.384323	0.0144313	0.868702	1.15114	0.336128	0.172311	1.22752	44.758
CF	482	17	2	2	B5	45 FP2	6.80156e-07	1.18807e-06	4.84843e-07	5.63589e-09	2.93694e-07	5.50755e-07	8.9893e-07		0.756629	1.32165	0.539355	0.00626955	0.326715	0.612678	0.798398	1.25251	1.39492	0.0601386	0.379958	0.0144396	0.947683	1.0552	0.386656	0.104252	0.85987	42.4305
CF	482	17	2	1	D11	45 FP3	6.73481e-07	8.74281e-07	4.44157e-07	1.3895e-08	5.73622e-07	6.43347e-07	7.6734e-07		0.877682	1.13937	0.578827	0.018108	0.747546	0.838412	0.75437	1.32561	1.66307	0.0738204	0.321585	0.0152364	1.16346	0.859503	0.348048	0.245298	2.32457	55.0271
VAR	482	17	2	2	F1	046 FP1	4.45114e-06	2.13254e-06			1.4274e-07	1.52882e-07	3.08094e-06		1.44473	0.69217			0.04633	0.0496219	0.861031	1.1614			0.258767	0.0153003	1.67791	0.59598			0.179041	3.24319
VAR	482	17	2	3	H1	046 FP1	3.45598e-06	1.12096e-06			3.11601e-07	2.45607e-07	1.96826e-06		1.75586	0.569521			0.158313	0.124784	0.861031	1.1614			0.258767	0.0153003	2.03925	0.490375			0.611798	8.15566
VAR	482	17	2	1	E8	046 FP2	4.81225e-06	1.42946e-06	6.33346e-06	6.02552e-08	4.39789e-07	2.29688e-07	2.62277e-06		1.8348	0.545019	2.4148	0.0229739	0.167681	0.0875748	0.997	1.00301	1.24464	0.0654053	0.303625	0.015432	1.84032	0.543384	1.94016	0.351255	0.552265	5.67488
CF	481	21	1	2	E1	45 FP1	6.5639e-07	6.31629e-07	1.11049e-06	1.54525e-08	5.25973e-09	5.69572e-08	6.43891e-07		1.01941	0.980957	1.72465	0.0239987	0.00816867	0.088458	0.74326	1.34542	1.8442	0.0610575	0.384323	0.0144313	1.37154	0.729106	0.935175	0.39305	0.0212547	6.12959
CF	481	21	1	1	G7	45 FP2	1.12335e-06	1.09109e-06	1.30221e-06	1.31536e-08	7.44301e-09	2.01933e-08	1.1071e-06		1.01468	0.985537	1.17623	0.011881	0.00672295	0.0182397	0.798398	1.25251	1.39492	0.0601386	0.379958	0.0144396	1.27089	0.786851	0.843223	0.197561	0.0176939	1.26317
CF	481	21	1	3	G8	45 FP2	1.12105e-06	1.04244e-06	1.72841e-06	3.1424e-08	7.23806e-09	2.18752e-08	1.08103e-06		1.03702	0.964304	1.59885	0.0290685	0.00669552	0.0202355	0.798398	1.25251	1.39492	0.0601386	0.379958	0.0144396	1.29887	0.769899	1.1462	0.483359	0.0176217	1.40139
VAR	481	21	1	2	F6	046 FP2	2.27239e-06	1.75024e-06	1.34694e-05	2.19388e-07	1.12231e-08	1.39079e-06	1.9943e-06		1.13944	0.877623	6.75397	0.110007	0.00562758	0.697381	0.997	1.00301	1.24464	0.0654053	0.303625	0.015432	1.14287	0.87499	5.42643	1.68194	0.0185347	45.1906
VAR	481	21	1	1	H7	046 FP2	3.31885e-06	1.0617e-06	5.28033e-06	5.55828e-08	4.50229e-07	4.13514e-07	1.87713e-06		1.76804	0.565598	2.81298	0.0296104	0.239849	0.22029	0.997	1.00301	1.24464	0.0654053	0.303625	0.015432	1.77336	0.563901	2.26006	0.452723	0.789954	14.2749
VAR	481	21	1	3	D10	046 FP3	4.10476e-06	1.23726e-06	1.80012e-05	2.79466e-07	1.04505e-08	9.30098e-06	2.25359e-06		1.82143	0.549018	7.98777	0.124009	0.00463729	4.12719	0.949281	1.05343	1.34601	0.0571498	0.301703	0.016402	1.91875	0.521172	5.93443	2.1699	0.0153704	251.627
CF	482	21	1	3	C3	45 FP1	7.94914e-07	1.08752e-06	4.62246e-07	3.32809e-09	1.24647e-07	5.48586e-07	9.29776e-07		0.854952	1.16966	0.497159	0.00357946	0.134061	0.59002	0.74326	1.34542	1.8442	0.0610575	0.384323	0.0144313	1.15027	0.869359	0.269579	0.0586244	0.348824	40.8847
CF	482	21	1	1	C11	45 FP3	9.01641e-07	1.16386e-06	5.1106e-07	7.73233e-09	1.24307e-07	6.12255e-07	1.02439e-06		0.88017	1.13614	0.49889	0.0075482	0.121346	0.597675	0.75437	1.32561	1.66307	0.0738204	0.321585	0.0152364	1.16676	0.857073	0.299982	0.102251	0.377339	39.2269
CF	482	21	1	2	F9	45 FP3	7.03211e-07	2.16916e-06	4.30954e-07	1.17952e-08	2.66123e-07	1.40544e-06	1.23506e-06		0.569373	1.75632	0.348933	0.00955027	0.215473	1.13795	0.75437	1.32561	1.66307	0.0738204	0.321585	0.0152364	0.754766	1.32491	0.209813	0.129372	0.670036	74.6865
VAR	482	21	1	3	E7	046 FP2	2.18472e-06	1.01251e-06	2.54122e-06	8.9054e-08	1.04096e-06	1.94018e-06	1.4873e-06		1.46892	0.680772	1.70861	0.0598763	0.699901	1.3045	0.997	1.00301	1.24464	0.0654053	0.303625	0.015432	1.47334	0.67873	1.37277	0.915467	2.30515	84.5318
VAR	482	21	1	2	H5	046 FP2	4.81757e-06	8.10422e-07	1.04304e-05	7.05766e-08	9.59761e-08	2.28003e-07	1.97592e-06		2.43814	0.410149	5.27876	0.0357183	0.0485728	0.115391	0.997	1.00301	1.24464	0.0654053	0.303625	0.015432	2.44548	0.408918	4.24118	0.546108	0.159976	7.47737
VAR	482	21	1	1	H9	046 FP3	3.77801e-06	1.32288e-06	6.51463e-06	9.19036e-08	7.90806e-08	1.78686e-07	2.23559e-06		1.68994	0.591737	2.91406	0.0411094	0.0353735	0.0799281	0.949281	1.05343	1.34601	0.0571498	0.301703	0.016402	1.78023	0.561724	2.16497	0.719327	0.117246	4.87307
CF	481	21	2	2	D4	45 FP1	9.6511e-07	1.04269e-06	1.34031e-06	2.83287e-08	7.89808e-09	1.80444e-08	1.00315e-06		0.962077	1.03942	1.3361	0.0282397	0.00787326	0.0179877	0.74326	1.34542	1.8442	0.0610575	0.384323	0.0144313	1.2944	0.772558	0.724485	0.462509	0.0204861	1.24643
CF	481	21	2	1	F1	45 FP1	7.6904e-07	5.58509e-07	7.63524e-07	1.34079e-08	5.7296e-09	1.40967e-07	6.55375e-07		1.17344	0.852198	1.16502	0.0204583	0.00874248	0.215093	0.74326	1.34542	1.8442	0.0610575	0.384323	0.0144313	1.57877	0.633405	0.631719	0.335066	0.0227478	14.9046
CF	481	21	2	3	F5	45 FP2	7.5727e-07	1.44912e-06	1.42181e-06	4.50328e-08	6.51745e-09	3.44769e-08	1.04756e-06		0.722892	1.38333	1.35726	0.0429885	0.00622158	0.0329118	0.798398	1.25251	1.39492	0.0601386	0.379958	0.0144396	0.905428	1.10445	0.973005	0.714823	0.0163744	2.27927
VAR	481	21	2	3	C3	046 FP1	1.5255e-06	8.87424e-07			2.29841e-09	1.14766e-08	1.16351e-06		1.31111	0.762711			0.0019754	0.00986376	0.861031	1.1614			0.258767	0.0153003	1.52272	0.656717			0.00763389	0.644676
VAR	481	21	2	1	E4	046 FP1	2.29423e-06	6.09133e-07			3.91754e-09	4.12752e-09	1.18215e-06		1.94072	0.515274			0.0033139	0.00349152	0.861031	1.1614			0.258767	0.0153003	2.25394	0.443667			0.0128065	0.228199
VAR	481	21	2	1	C9	046 FP3	4.14357e-06	1.25505e-06	1.61317e-05	2.15606e-07	7.69208e-09	3.18123e-08	2.28043e-06		1.81701	0.550355	7.07394	0.0945459	0.00337308	0.0139501	0.949281	1.05343	1.34601	0.0571498	0.301703	0.016402	1.91409	0.522442	5.25551	1.65435	0.0111801	0.850512
CF	482	21	2	2	C4	45 FP1	1.11388e-06	1.10827e-06	7.46577e-07	1.03076e-08	1.81831e-07	4.07496e-07	1.11107e-06		1.00253	0.997479	0.671945	0.00927718	0.163654	0.36676	0.74326	1.34542	1.8442	0.0610575	0.384323	0.0144313	1.34882	0.741387	0.364355	0.151942	0.425825	25.4142
CF	482	21	2	3	D3	45 FP1	9.74923e-07	1.27512e-06	4.71573e-07	5.04749e-09	1.82332e-07	3.98199e-07	1.11496e-06		0.8744	1.14364	0.42295	0.00452705	0.163532	0.357141	0.74326	1.34542	1.8442	0.0610575	0.384323	0.0144313	1.17644	0.850023	0.22934	0.0741441	0.425507	24.7476
CF	482	21	2	1	B9	45 FP3	3.66931e-07	1.40127e-06	4.41027e-07	9.6979e-09	1.56885e-07	5.82974e-07	7.17056e-07		0.511719	1.9542	0.615053	0.0135246	0.21879	0.813009	0.75437	1.32561	1.66307	0.0738204	0.321585	0.0152364	0.67834	1.47419	0.36983	0.18321	0.68035	53.3598
VAR	482	21	2	3	D3	046 FP1	3.98788e-06	1.64771e-06			9.42142e-08	3.29064e-07	2.56337e-06		1.55572	0.64279			0.0367541	0.128372	0.861031	1.1614			0.258767	0.0153003	1.80681	0.553462			0.142035	8.39013
VAR	482	21	2	2	D12	046 FP3	5.97475e-06	9.4163e-07	1.40697e-05	1.989e-07	3.15832e-07	1.4752e-07	2.37192e-06		2.51895	0.39699	5.93179	0.0838561	0.133155	0.0621943	0.949281	1.05343	1.34601	0.0571498	0.301703	0.016402	2.65354	0.376855	4.40696	1.4673	0.441343	3.79188
VAR	482	21	2	1	F10	046 FP3	4.48942e-06	1.14744e-06	2.01588e-05	2.81943e-07	8.52464e-09	2.32484e-07	2.26966e-06		1.97802	0.505557	8.88184	0.124223	0.00375591	0.102431	0.949281	1.05343	1.34601	0.0571498	0.301703	0.016402	2.0837	0.479916	6.59867	2.17363	0.012449	6.24505

## Sheet: North_Sweden_16
Gen	Sampling	Timepoint	Timepoint_Cold	Tray	PlantNo	tissueCode	plateCode	efficiency_PP2A	efficiency_UBC	efficiency_FLC	efficiency_UNF	efficiency_VIN3	PP2A_N0	UBC_N0	FLC_N0	UNF_N0	VIN3_N0	geoMean	Flag	PP2A	UBC	FLC	UNF	VIN3	PP2A_plCtrl	UBC_plCtrl	FLC_plCtrl	UNF_plCtrl	VIN3_plCtrl	PP2A_plateCorrected	UBC_plateCorrected	FLC_plateCorrected	UNF_plateCorrected	VIN3_plateCorrected
BRO	1	11	11	1	23	D7	SA1 FP2	1.88108	1.87202	1.89195	1.68745	1.85625	7.99e-08	2.19e-08	1.66e-07	7.75e-08	3.01e-10	4.18e-08	Bad UBC	1.90871	0.523915	3.95916	1.85212	0.00719373	0.995604	1.00442	1.26557	0.102839	0.205655	1.91713	0.521612	3.12837	18.01	0.0349797
BRO	1	11	11	2	13	G3	SA2 FP1	1.86516	1.87824	1.88261	1.60706	1.80947	2.77e-07	8.52e-08	6.48e-07	6.99e-07	3.15e-09	1.54e-07	NaN	1.8023	0.554847	4.22018	4.55349	0.0205165	1.03694	0.964375	1.30048	0.404548	0.307802	1.73809	0.575344	3.2451	11.2557	0.0666548
BRO	1	11	11	2	11	H1	SA2 FP1	1.86516	1.87824	1.88261	1.60706	1.80947	3.37e-08	2.17e-08	1.92e-07	1.73e-07	8.32e-10	2.7e-08	Bad UBC	1.24659	0.802189	7.10815	6.42213	0.0307883	1.03694	0.964375	1.30048	0.404548	0.307802	1.20218	0.831822	5.46581	15.8748	0.100026
BRO	1	11	11	3	16	B5	SA4 FP2	1.90303	1.88082	1.89989	1.68512	1.86345	2.18e-06	6.39e-07	1.68e-06	1.75e-07	2.34e-07	1.18e-06	NaN	1.84495	0.542019	1.42329	0.148068	0.197949	1.1967	0.835629	1.14411	0.126625	0.312368	1.5417	0.648636	1.24401	1.16934	0.633704
BRO	1	11	11	3	18	E12	SA4 FP3	1.891	1.881	1.9	1.739	1.87	4.2e-08	2.59e-08	2.53e-07	3.01e-08	7.79e-10	3.3e-08	NaN	1.27454	0.784598	7.6626	0.913139	0.0236283	1.08237	0.923895	1.18757	0.0436103	0.241931	1.17754	0.849229	6.45235	20.9386	0.0976654
BRO	1	11	11	3	25	F12	SA4 FP3	1.891	1.881	1.9	1.739	1.87	5.27e-08	4.59e-08	3.83e-07	4.45e-08	1.45e-09	4.92e-08	NaN	1.07177	0.933032	7.79902	0.905563	0.0294492	1.08237	0.923895	1.18757	0.0436103	0.241931	0.990207	1.00989	6.56722	20.7649	0.121725
EDI	1	11	11	2	1	C8	SA1 FP2	1.88108	1.87202	1.89195	1.68745	1.85625	1.88e-07	9.3e-08	4.12e-07	1.3e-07	3.26e-09	1.32e-07	NaN	1.42365	0.702421	3.11598	0.978725	0.0246099	0.995604	1.00442	1.26557	0.102839	0.205655	1.42993	0.699334	2.46213	9.51708	0.119666
EDI	1	11	11	2	9	D4	SA2 FP1	1.86516	1.87824	1.88261	1.60706	1.80947	2.8e-07	9.58e-08	4.47e-07	5.78e-07	1.07e-08	1.64e-07	NaN	1.70934	0.58502	2.72692	3.5279	0.0653821	1.03694	0.964375	1.30048	0.404548	0.307802	1.64845	0.606631	2.09686	8.72059	0.212416
EDI	1	11	11	2	3	E8	SA2 FP2	1.884	1.879	1.897	1.705	1.852	7.52e-09	3.41e-09	1.32e-08	2.5e-09	9.07e-11	5.06e-09	Bad UBC	1.48554	0.673157	2.61426	0.494402	0.0179107	1.08417	0.922366	1.16193	0.0810971	0.244553	1.37021	0.729815	2.24994	6.09642	0.0732386
EDI	1	11	11	2	4	D9	SA2 FP3	1.875	1.904	1.888	1.646	1.83	4.82e-08	1.22e-08	1.06e-07	7.45e-08	1.42e-09	2.43e-08	Bad UBC	1.98741	0.503168	4.35901	3.06901	0.0583869	1.1766	0.849908	1.21772	0.195822	0.264952	1.68911	0.592026	3.57965	15.6725	0.220368
EDI	1	11	11	2	26	E10	SA3 FP3	1.916	1.884	1.9	1.693	1.853	1.05e-08	2.87e-09	1.73e-08	1.25e-08	7.11e-10	5.48e-09	Bad UBC	1.91347	0.52261	3.14679	2.28713	0.129726	0.947537	1.05537	1.40604	0.122656	0.34761	2.01942	0.495193	2.23806	18.6468	0.373193
EDI	1	11	11	3	3	E11	SA3 FP3	1.916	1.884	1.9	1.693	1.853	4.61e-07	1.55e-07	5.5e-07	3.35e-07	2.69e-08	2.67e-07	NaN	1.72665	0.579157	2.05921	1.25355	0.100822	0.947537	1.05537	1.40604	0.122656	0.34761	1.82225	0.548773	1.46454	10.22	0.290044
EDIN	1	11	11	1	17	D10	SA1 FP3	1.89706	1.86936	1.88908	1.66336	1.82491	5.62e-08	2.52e-08	9.18e-08	7.52e-08	5.12e-10	3.76e-08	Bad UBC	1.49374	0.669459	2.44117	1.99777	0.0136002	0.918119	1.08918	1.27429	0.167865	0.299425	1.62696	0.614643	1.91571	11.9011	0.045421
EDIN	1	11	11	1	26	F10	SA1 FP3	1.89706	1.86936	1.88908	1.66336	1.82491	8.06e-08	6.63e-08	1.52e-07	1.04e-07	2.73e-09	7.31e-08	Bad UBC	1.10296	0.90665	2.07513	1.41897	0.0373718	0.918119	1.08918	1.27429	0.167865	0.299425	1.20133	0.832412	1.62846	8.45305	0.124812
EDIN	1	11	11	2	5	C3	SA2 FP1	1.86516	1.87824	1.88261	1.60706	1.80947	9.67e-08	7.13e-08	1.61e-07	2.42e-07	2.07e-09	8.3e-08	NaN	1.16481	0.858512	1.94318	2.90957	0.0249268	1.03694	0.964375	1.30048	0.404548	0.307802	1.12331	0.890227	1.4942	7.19214	0.0809832
EDIN	1	11	11	2	7	B6	SA2 FP2	1.884	1.879	1.897	1.705	1.852	7.39e-08	4.33e-08	7.25e-08	3.63e-08	1.1e-09	5.65e-08	NaN	1.30677	0.765246	1.28163	0.641415	0.0193745	1.08417	0.922366	1.16193	0.0810971	0.244553	1.20532	0.829656	1.10302	7.90923	0.0792242
EDIN	1	11	11	2	8	D5	SA2 FP2	1.884	1.879	1.897	1.705	1.852	7.47e-08	4.16e-08	1.24e-07	3.55e-08	8.52e-10	5.58e-08	NaN	1.34065	0.745908	2.21818	0.636897	0.0152849	1.08417	0.922366	1.16193	0.0810971	0.244553	1.23657	0.80869	1.90905	7.85351	0.0625014
EDIN	1	11	11	3	24	C7	SA4 FP2	1.90303	1.88082	1.89989	1.68512	1.86345	9.04e-08	8.18e-08	1.82e-07	6.29e-08	3.28e-09	8.6e-08	NaN	1.05101	0.951466	2.11048	0.731089	0.0380772	1.1967	0.835629	1.14411	0.126625	0.312368	0.878254	1.13862	1.84464	5.77365	0.121899
LOV	1	11	11	1	16	C3	SA1 FP1	1.89793	1.9112	1.91557	1.63448	1.88312	2.15e-08	8.82e-09	9.11e-08	1.96e-07	2.33e-10	1.38e-08	Bad UBC	1.55995	0.641046	6.6228	14.2812	0.0169113	1.16648	0.857281	1.18104	0.551543	0.278582	1.33732	0.747766	5.6076	25.8932	0.0607049
LOV	1	11	11	2	12	H12	SA2 FP3	1.875	1.904	1.888	1.646	1.83	1.84e-07	5.11e-08	4.37e-07	3.65e-07	4.76e-09	9.71e-08	NaN	1.89945	0.526467	4.49999	3.75973	0.0489935	1.1766	0.849908	1.21772	0.195822	0.264952	1.61436	0.61944	3.69543	19.1997	0.184915
LOV	1	11	11	2	22	C2	SA3 FP1	1.89205	1.89355	1.89836	1.75803	1.86576	4.68e-10	1.37e-12	4.06e-13	0	1.01e-10	2.54e-11	Bad UBC	NaN	NaN	NaN	NaN	NaN	NaN	NaN	NaN	NaN	NaN	NaN	NaN	NaN	NaN	NaN
LOV	1	11	11	3	1	F1	SA3 FP1	1.89205	1.89355	1.89836	1.75803	1.86576	6.44e-07	1.53e-07	1.53e-06	1.42e-07	2.08e-09	3.14e-07	NaN	2.05275	0.487152	4.87871	0.45334	0.00663326	1.22252	0.817984	1.33144	0.0366091	0.300785	1.67911	0.595552	3.66424	12.3833	0.0220532
LOV	1	11	11	3	11	H5	SA4 FP2	1.90303	1.88082	1.89989	1.68512	1.86345	2.76e-07	9.21e-08	4.58e-07	1.41e-07	8.92e-09	1.59e-07	NaN	1.73055	0.57785	2.8718	0.88312	0.055953	1.1967	0.835629	1.14411	0.126625	0.312368	1.4461	0.691515	2.51007	6.97428	0.179125
LOV	1	11	11	3	14	D12	SA4 FP3	1.891	1.881	1.9	1.739	1.87	7.93e-08	3.88e-08	4.98e-07	5.29e-08	3.91e-09	5.55e-08	NaN	1.42913	0.699728	8.97128	0.95314	0.0705416	1.08237	0.923895	1.18757	0.0436103	0.241931	1.32036	0.757367	7.55433	21.8559	0.291577
NIL2	1	11	11	1	9	D6	SA1 FP2	1.88108	1.87202	1.89195	1.68745	1.85625	2.68e-08	1.78e-08	5.73e-08	2.17e-08	1.26e-10	2.18e-08	Bad UBC	1.22726	0.814821	2.62652	0.996117	0.00576897	0.995604	1.00442	1.26557	0.102839	0.205655	1.23268	0.81124	2.07537	9.6862	0.0280518
NIL2	1	11	11	2	15	H5	SA2 FP2	1.884	1.879	1.897	1.705	1.852	6.38e-07	2.63e-07	8.35e-07	2.35e-07	5.86e-09	4.1e-07	NaN	1.5567	0.642383	2.03581	0.572811	0.0142879	1.08417	0.922366	1.16193	0.0810971	0.244553	1.43585	0.696452	1.7521	7.06327	0.0584245
NIL2	1	11	11	3	4	B1	SA3 FP1	1.89205	1.89355	1.89836	1.75803	1.86576	2.11e-09	2.29e-09	6.21e-09	1.23e-09	5.92e-11	2.2e-09	Bad UBC	0.961046	1.04053	2.82587	0.561146	0.0269439	1.22252	0.817984	1.33144	0.0366091	0.300785	0.78612	1.27207	2.12242	15.3281	0.0895787
NIL2	1	11	11	3	5	F3	SA3 FP1	1.89205	1.89355	1.89836	1.75803	1.86576	7.33e-08	2.12e-08	1.4e-07	2.06e-08	1.49e-09	3.95e-08	NaN	1.85686	0.538543	3.54225	0.522055	0.0378178	1.22252	0.817984	1.33144	0.0366091	0.300785	1.51888	0.658379	2.66046	14.2603	0.12573
NIL2	1	11	11	2	25	H4	SA3 FP1	1.89205	1.89355	1.89836	1.75803	1.86576	2.94e-10	5.94e-10	1.61e-09	2.51e-10	5.18e-11	4.18e-10	Bad UBC	0.70381	1.42084	3.86396	0.599832	0.123988	1.22252	0.817984	1.33144	0.0366091	0.300785	0.575705	1.737	2.90209	16.3848	0.412214
NIL2	1	11	11	3	6	F12	SA3 FP3	1.916	1.884	1.9	1.693	1.853	8.62e-08	8.72e-08	3.12e-07	1.74e-07	6.03e-09	8.67e-08	NaN	0.993706	1.00633	3.59349	2.0022	0.0695173	0.947537	1.05537	1.40604	0.122656	0.34761	1.04872	0.953539	2.55575	16.3237	0.199986
SF2	1	11	11	3	15	C6	S26 FP2	1.886	1.89	1.902	1.701	1.854	1.71e-06	3.06e-07	1.23e-06	5.15e-07	1.04e-08	7.23e-07	NaN	2.36246	0.423288	1.7002	0.711961	0.0144033	1.18581	0.843303	1.17086	0.0708928	0.329303	1.99227	0.50194	1.45209	10.0428	0.0437388
SF2	1	11	11	1	6	C3	S27 FP1	1.889	1.886	1.898	1.684	1.846	1.22e-07	1.57e-07	3.38e-07	8.67e-08	8.07e-10	1.38e-07	NaN	0.882228	1.13349	2.44956	0.627533	0.00584165	1.18581	0.843303	1.17086	0.0708928	0.329303	0.743986	1.34411	2.0921	8.85186	0.0177394
SF2	1	11	11	2	28	F2	S27 FP1	1.889	1.886	1.898	1.684	1.846	4.7e-07	1.45e-07	2.29e-07	5.71e-08	6.49e-09	2.61e-07	NaN	1.79666	0.556587	0.877628	0.218479	0.0248121	1.18581	0.843303	1.17086	0.0708928	0.329303	1.51513	0.660008	0.749557	3.08181	0.0753474
SF2	1	11	11	1	11	F8	S27 FP2	1.892	1.887	1.903	1.708	1.887	1.82e-08	1.37e-08	5.81e-08	1.64e-08	4.58e-11	1.58e-08	Bad UBC	1.15364	0.866822	3.67835	1.04132	0.00290132	1.15614	0.864949	1.2476	0.0563462	0.18217	0.997839	1.00217	2.94834	18.4808	0.0159264
ULL	1	11	11	1	21	F5	SA1 FP2	1.88108	1.87202	1.89195	1.68745	1.85625	2.93e-08	1.17e-08	5.35e-08	2.95e-08	6.54e-11	1.85e-08	Bad UBC	1.58186	0.632168	2.88875	1.59566	0.00353348	0.995604	1.00442	1.26557	0.102839	0.205655	1.58884	0.629389	2.28257	15.5161	0.0171816
ULL	1	11	11	1	20	G11	SA1 FP3	1.89706	1.86936	1.88908	1.66336	1.82491	7.83e-12	4.53e-13	0	2.24e-10	2.06e-12	1.88e-12	Bad UBC	NaN	NaN	NaN	NaN	NaN	NaN	NaN	NaN	NaN	NaN	NaN	NaN	NaN	NaN	NaN
ULL	1	11	11	2	10	D11	SA2 FP3	1.875	1.904	1.888	1.646	1.83	4.93e-10	1.47e-10	2.2e-10	0	4.45e-11	2.69e-10	Bad UBC	NaN	NaN	NaN	NaN	NaN	NaN	NaN	NaN	NaN	NaN	NaN	NaN	NaN	NaN	NaN
ULL	1	11	11	3	7	E3	SA3 FP1	1.89205	1.89355	1.89836	1.75803	1.86576	5.44e-08	1e-08	1.15e-07	1.96e-08	1.93e-09	2.33e-08	Bad UBC	2.33161	0.428888	4.93448	0.841954	0.0828834	1.22252	0.817984	1.33144	0.0366091	0.300785	1.90722	0.524324	3.70612	22.9985	0.275557
ULL	1	11	11	2	18	F2	SA3 FP1	1.89205	1.89355	1.89836	1.75803	1.86576	2.92e-08	4.06e-09	4.84e-08	8.97e-09	6.14e-10	1.09e-08	Bad UBC	2.68474	0.372475	4.44071	0.823198	0.0563333	1.22252	0.817984	1.33144	0.0366091	0.300785	2.19607	0.455358	3.33527	22.4862	0.187288
ULL	1	11	11	2	21	D11	SA3 FP3	1.916	1.884	1.9	1.693	1.853	5.24e-08	1.8e-08	1.55e-07	9.43e-08	2.73e-09	3.07e-08	Bad UBC	1.70635	0.586046	5.05101	3.07364	0.0890865	0.947537	1.05537	1.40604	0.122656	0.34761	1.80083	0.555301	3.59237	25.0591	0.256283
ULLN	1	11	11	1	15	C1	SA1 FP1	1.89793	1.9112	1.91557	1.63448	1.88312	2.29e-07	1.25e-07	3.69e-07	9.8e-07	2.36e-09	1.69e-07	NaN	1.35306	0.739067	2.18267	5.79586	0.0139442	1.16648	0.857281	1.18104	0.551543	0.278582	1.15995	0.862106	1.84809	10.5084	0.0500544
ULLN	1	11	11	1	10	C12	SA1 FP3	1.89706	1.86936	1.88908	1.66336	1.82491	9.06e-09	1.73e-08	6.09e-08	4.19e-08	1.56e-10	1.25e-08	Bad UBC	0.723033	1.38306	4.86309	3.34872	0.0124811	0.918119	1.08918	1.27429	0.167865	0.299425	0.787516	1.26982	3.81632	19.9489	0.0416837
ULLN	1	11	11	2	14	F5	SA2 FP2	1.884	1.879	1.897	1.705	1.852	3.04e-07	1.45e-07	5.02e-07	1.61e-07	1.87e-09	2.1e-07	NaN	1.44776	0.690721	2.39149	0.764992	0.00891231	1.08417	0.922366	1.16193	0.0810971	0.244553	1.33537	0.748858	2.05821	9.43304	0.0364433
ULLN	1	11	11	2	24	H5	SA3 FP2	1.891	1.88	1.906	1.679	1.862	4.14e-07	2.4e-07	4.51e-07	4.46e-07	7.84e-09	3.16e-07	NaN	1.313	0.761615	1.4307	1.41457	0.0248496	1.10542	0.904638	1.08647	0.12873	0.274573	1.18779	0.841901	1.31683	10.9886	0.0905025
ULLN	1	11	11	3	9	H9	SA3 FP3	1.916	1.884	1.9	1.693	1.853	3.64e-07	1.75e-07	6.17e-07	3.57e-07	1.15e-08	2.53e-07	NaN	1.44037	0.694267	2.44139	1.41134	0.0455134	0.947537	1.05537	1.40604	0.122656	0.34761	1.52012	0.657844	1.73636	11.5065	0.130932
ULLN	1	11	11	3	22	H12	SA4 FP3	1.891	1.881	1.9	1.739	1.87	7.51e-08	3.94e-08	1.71e-07	2.57e-08	1.15e-09	5.44e-08	NaN	1.38089	0.724172	3.13461	0.47274	0.0210695	1.08237	0.923895	1.18757	0.0436103	0.241931	1.2758	0.783825	2.63952	10.8401	0.087089
VAR	1	11	11	1	7	F2	SA1 FP1	1.89793	1.9112	1.91557	1.63448	1.88312	3.74e-07	8.69e-08	9.73e-07	1.94e-06	1.14e-09	1.8e-07	NaN	2.07418	0.482119	5.39875	10.7475	0.00630449	1.16648	0.857281	1.18104	0.551543	0.278582	1.77815	0.562382	4.57118	19.4863	0.0226307
VAR	1	11	11	1	27	H4	SA1 FP1	1.89793	1.9112	1.91557	1.63448	1.88312	1.29e-06	8.13e-07	4.71e-06	5.3e-06	3.25e-09	1.02e-06	NaN	1.25797	0.794932	4.60763	5.18046	0.00317977	1.16648	0.857281	1.18104	0.551543	0.278582	1.07843	0.927271	3.90133	9.39265	0.0114141
VAR	1	11	11	2	16	C8	SA2 FP2	1.884	1.879	1.897	1.705	1.852	3.18e-06	3.19e-07	4.64e-06	6.78e-07	2.85e-08	1.01e-06	NaN	3.15545	0.316912	4.60088	0.672833	0.0283101	1.08417	0.922366	1.16193	0.0810971	0.244553	2.91048	0.343585	3.9597	8.29663	0.115763
VAR	1	11	11	2	19	B2	SA3 FP1	1.89205	1.89355	1.89836	1.75803	1.86576	5.98e-07	1.16e-07	1.37e-06	1.38e-07	2.12e-09	2.63e-07	NaN	2.26985	0.440559	5.20723	0.524797	0.0080633	1.22252	0.817984	1.33144	0.0366091	0.300785	1.8567	0.538591	3.91098	14.3352	0.0268075
VAR	1	11	11	3	21	H2	SA4 FP1	1.895	1.884	1.9	1.717	1.856	1.16e-07	2.59e-08	3.12e-07	6.91e-08	2.99e-09	5.48e-08	NaN	2.11559	0.472682	5.68708	1.26018	0.0544923	1.14057	0.876753	1.23905	0.0691018	0.32793	1.85485	0.539128	4.58987	18.2366	0.166171
VAR	1	11	11	3	27	C10	SA4 FP3	1.891	1.881	1.9	1.739	1.87	1.9e-07	4.19e-08	4.99e-07	7.76e-08	9.15e-10	8.93e-08	NaN	2.12918	0.469664	5.59156	0.868825	0.0102555	1.08237	0.923895	1.18757	0.0436103	0.241931	1.96714	0.508352	4.70842	19.9225	0.0423901
VARN	1	11	11	1	8	D4	SA1 FP1	1.89793	1.9112	1.91557	1.63448	1.88312	1.86e-07	6.98e-08	3.4e-07	6.69e-07	1.12e-09	1.14e-07	NaN	1.63388	0.612039	2.97908	5.86038	0.00985532	1.16648	0.857281	1.18104	0.551543	0.278582	1.4007	0.713931	2.52242	10.6254	0.0353768
VARN	1	11	11	1	14	F9	SA1 FP3	1.89706	1.86936	1.88908	1.66336	1.82491	7.65e-08	3.91e-08	3.07e-07	1.74e-07	1.6e-09	5.47e-08	Bad UBC	1.39945	0.714565	5.61804	3.1872	0.0293059	0.918119	1.08918	1.27429	0.167865	0.299425	1.52426	0.656056	4.40877	18.9867	0.097874
VARN	1	11	11	2	6	D10	SA2 FP3	1.875	1.904	1.888	1.646	1.83	5.36e-07	1.66e-07	1.45e-06	5.93e-07	5.19e-09	2.98e-07	NaN	1.79439	0.557293	4.87199	1.98646	0.0173953	1.1766	0.849908	1.21772	0.195822	0.264952	1.52506	0.65571	4.00092	10.1442	0.0656548
VARN	1	11	11	3	26	G3	SA4 FP1	1.895	1.884	1.9	1.717	1.856	4.23e-07	1.13e-07	9.62e-07	1.85e-07	8.39e-09	2.19e-07	NaN	1.93121	0.51781	4.38952	0.843005	0.0382653	1.14057	0.876753	1.23905	0.0691018	0.32793	1.69319	0.5906	3.54265	12.1995	0.116687
VARN	1	11	11	3	19	B6	SA4 FP2	1.90303	1.88082	1.89989	1.68512	1.86345	4.01e-07	1.3e-07	6.84e-07	1.92e-07	4.92e-09	2.28e-07	NaN	1.7557	0.569575	2.99307	0.839883	0.0215348	1.1967	0.835629	1.14411	0.126625	0.312368	1.46711	0.681612	2.61607	6.63282	0.0689404
VARN	1	11	11	3	23	B11	SA4 FP3	1.891	1.881	1.9	1.739	1.87	5.64e-08	5.12e-08	3.76e-07	4.73e-08	2.72e-09	5.37e-08	NaN	1.04937	0.952957	6.99356	0.879871	0.0505445	1.08237	0.923895	1.18757	0.0436103	0.241931	0.969504	1.03146	5.88898	20.1758	0.208921
VIN3-1	1	11	11	2	20	C4	S26 FP1	1.892	1.883	1.898	1.673	1.838	1.06e-06	2.42e-07	6.29e-07	2.96e-07	3.31e-10	5.07e-07	NaN	2.09715	0.476837	1.24002	0.583213	0.000653437	1.16497	0.858394	1.29943	0.114311	0.403842	1.80018	0.555499	0.954281	5.10199	0.00161805
VIN3-1	1	11	11	1	24	B6	S26 FP2	1.886	1.89	1.902	1.701	1.854	3.38e-07	1.07e-07	2.9e-07	1.17e-07	1.21e-10	1.9e-07	NaN	1.77756	0.56257	1.52311	0.617126	0.000634672	1.18581	0.843303	1.17086	0.0708928	0.329303	1.49902	0.667103	1.30085	8.70506	0.00192732
VIN3-1	1	11	11	1	25	F5	S26 FP2	1.886	1.89	1.902	1.701	1.854	3.29e-07	6.1e-08	1.79e-07	4.58e-08	2.39e-10	1.42e-07	NaN	2.32293	0.430491	1.26723	0.323225	0.00168953	1.18581	0.843303	1.17086	0.0708928	0.329303	1.95893	0.510482	1.0823	4.55935	0.00513063
VIN3-1	1	11	11	1	13	B2	S27 FP1	1.889	1.886	1.898	1.684	1.846	4.28e-06	6.29e-07	1.21e-06	1.36e-07	2.67e-10	1.64e-06	NaN	2.60663	0.383638	0.737558	0.0830531	0.000162681	1.18581	0.843303	1.17086	0.0708928	0.329303	2.19818	0.454922	0.629928	1.17153	0.000494015
VIN3-1	1	11	11	1	4	E6	S27 FP2	1.892	1.887	1.903	1.708	1.887	6.65e-09	4.45e-09	9.75e-09	3.7e-09	0	5.44e-09	Bad UBC	1.2224	0.818064	1.79209	0.680609	NaN	1.15614	0.864949	1.2476	0.0563462	0.18217	1.05731	0.945794	1.43643	12.079	NaN
BRO	2	18	18	3	28	B3	SA4 FP1	1.895	1.884	1.9	1.717	1.856	1.2e-07	4.62e-08	4.17e-07	7.08e-08	1.83e-09	7.46e-08	NaN	1.61444	0.619412	5.58184	0.948544	0.0245389	1.14057	0.876753	1.23905	0.0691018	0.32793	1.41546	0.706484	4.50493	13.7268	0.0748298
BRO	2	18	18	2	16	D3	SA4 FP1	1.895	1.884	1.9	1.717	1.856	6.21e-08	2.54e-08	2.73e-07	4.5e-08	7.55e-10	3.97e-08	NaN	1.56496	0.638992	6.87514	1.13304	0.0190126	1.14057	0.876753	1.23905	0.0691018	0.32793	1.37209	0.728817	5.54872	16.3967	0.0579776
BRO	2	18	18	2	12	E2	SA4 FP1	1.895	1.884	1.9	1.717	1.856	5.08e-08	2.18e-08	2.17e-07	3.48e-08	7.59e-10	3.33e-08	NaN	1.52663	0.655038	6.5295	1.04556	0.0228066	1.14057	0.876753	1.23905	0.0691018	0.32793	1.33848	0.747119	5.26976	15.1307	0.0695472
BRO	2	18	18	1	7	E3	SA4 FP1	1.895	1.884	1.9	1.717	1.856	5.38e-08	1.85e-08	2.15e-07	2.38e-08	4.01e-10	3.16e-08	Bad UBC	1.70378	0.586931	6.80968	0.752406	0.0126911	1.14057	0.876753	1.23905	0.0691018	0.32793	1.49379	0.669437	5.49589	10.8884	0.0387007
BRO	2	18	18	3	7	H4	SA4 FP1	1.895	1.884	1.9	1.717	1.856	4.7e-08	2.38e-08	2.81e-07	3.2e-08	1.35e-09	3.34e-08	NaN	1.40583	0.711324	8.40909	0.95798	0.0404894	1.14057	0.876753	1.23905	0.0691018	0.32793	1.23256	0.811317	6.78673	13.8633	0.12347
BRO	2	18	18	3	14	D9	SA4 FP3	1.891	1.881	1.9	1.739	1.87	1.33e-08	3.76e-09	8.08e-08	9.07e-09	1.5e-10	7.06e-09	Bad UBC	NaN	NaN	NaN	NaN	NaN	NaN	NaN	NaN	NaN	NaN	NaN	NaN	NaN	NaN	NaN
SF2	2	18	18	1	18	B1	S26 FP1	1.892	1.883	1.898	1.673	1.838	1.42e-07	1.4e-07	2.82e-07	7.96e-08	1.28e-09	1.41e-07	NaN	1.0085	0.991573	2.005	0.565155	0.00905845	1.16497	0.858394	1.29943	0.114311	0.403842	0.865689	1.15515	1.54299	4.94402	0.0224307
SF2	2	18	18	3	22	C2	S26 FP1	1.892	1.883	1.898	1.673	1.838	7.35e-08	8.66e-08	1.94e-07	6.63e-08	3.12e-09	7.98e-08	NaN	0.921205	1.08553	2.43184	0.830413	0.0390777	1.16497	0.858394	1.29943	0.114311	0.403842	0.790757	1.26461	1.87147	7.26452	0.0967648
SF2	2	18	18	1	16	B5	S26 FP2	1.886	1.89	1.902	1.701	1.854	1.02e-06	1.31e-07	5.96e-07	1.36e-07	3.78e-09	3.66e-07	NaN	2.78945	0.358493	1.62877	0.372247	0.0103167	1.18581	0.843303	1.17086	0.0708928	0.329303	2.35236	0.425106	1.39109	5.25084	0.0313289
SF2	2	18	18	2	1	S27 H9	S26,7,8 FP3	1.88	1.892	1.904	1.701	1.845	0	6.16e-08	1.33e-07	3.51e-08	1.25e-09	0	NaN	NaN	NaN	NaN	NaN	NaN	NaN	NaN	NaN	NaN	NaN	NaN	NaN	NaN	NaN	NaN
SF2	2	18	18	1	27	B6	S27 FP2	1.892	1.887	1.903	1.708	1.887	7.66e-07	1.87e-07	2.17e-07	5.78e-08	1.32e-09	3.79e-07	NaN	2.02227	0.494494	0.571751	0.15266	0.00347738	1.15614	0.864949	1.2476	0.0563462	0.18217	1.74916	0.571703	0.45828	2.70932	0.0190886
SF2	2	18	18	3	25	G3	S26 FP1	1.892	1.883	1.898	1.673	1.838	4.14e-08	2.89e-08	6.69e-08	2.38e-08	8.23e-10	3.45e-08	NaN	1.19708	0.835364	1.93611	0.688373	0.0238268	1.16497	0.858394	1.29943	0.114311	0.403842	1.02757	0.973171	1.48997	6.02194	0.0590003
ULLN	2	18	18	1	3	D1	SA4 FP1	1.895	1.884	1.9	1.717	1.856	4.14e-08	1.42e-08	6.37e-08	1.16e-08	5.94e-10	2.42e-08	Bad UBC	1.70719	0.585757	2.6295	0.476959	0.0245151	1.14057	0.876753	1.23905	0.0691018	0.32793	1.49679	0.668098	2.12219	6.90227	0.0747572
ULLN	2	18	18	1	22	C8	SA4 FP2	1.90303	1.88082	1.89989	1.68512	1.86345	1.74e-07	7.51e-08	2.81e-07	6.92e-08	2.23e-09	1.14e-07	NaN	1.52123	0.657361	2.45728	0.606081	0.0195055	1.1967	0.835629	1.14411	0.126625	0.312368	1.27119	0.786666	2.14777	4.78642	0.0624439
ULLN	2	18	18	1	24	B9	SA4 FP3	1.891	1.881	1.9	1.739	1.87	9.17e-08	5.48e-08	2.3e-07	3.26e-08	6.76e-10	7.09e-08	NaN	1.29283	0.773498	3.24613	0.459867	0.00953674	1.08237	0.923895	1.18757	0.0436103	0.241931	1.19444	0.837213	2.73342	10.5449	0.0394192
ULLN	2	18	18	1	6	C11	SA4 FP3	1.891	1.881	1.9	1.739	1.87	1.52e-07	1.37e-07	2.74e-07	2.85e-08	1.54e-09	1.44e-07	NaN	1.05351	0.949204	1.90077	0.197305	0.0106779	1.08237	0.923895	1.18757	0.0436103	0.241931	0.973337	1.02739	1.60056	4.52427	0.0441362
ULLN	2	18	18	3	1	E10	SA4 FP3	1.891	1.881	1.9	1.739	1.87	2.66e-08	1.26e-08	6.64e-08	1.2e-08	5.64e-10	1.83e-08	Bad UBC	1.45437	0.687581	3.63531	0.659356	0.0308918	1.08237	0.923895	1.18757	0.0436103	0.241931	1.34369	0.74422	3.06114	15.1193	0.127688
ULLN	2	18	18	1	8	G12	SA4 FP3	1.891	1.881	1.9	1.739	1.87	7.68e-08	8.72e-08	3.18e-07	2.42e-08	2.85e-10	8.18e-08	NaN	0.938473	1.06556	3.88064	0.295439	0.00347702	1.08237	0.923895	1.18757	0.0436103	0.241931	0.867051	1.15334	3.26773	6.77452	0.0143719
VIN3-1	2	18	18	1	20	H1	S26 FP1	1.892	1.883	1.898	1.673	1.838	2.65e-06	3.94e-07	1.02e-06	4.98e-07	3.92e-10	1.02e-06	NaN	2.59578	0.38524	1.00271	0.487408	0.000383983	1.16497	0.858394	1.29943	0.114311	0.403842	2.2282	0.448792	0.771658	4.26388	0.000950825
VIN3-1	2	18	18	1	5	D8	S26 FP2	1.886	1.89	1.902	1.701	1.854	5.74e-08	3.52e-08	6.58e-08	2.14e-08	0	4.5e-08	NaN	1.27579	0.783828	1.46339	0.475722	NaN	1.18581	0.843303	1.17086	0.0708928	0.329303	1.07588	0.929474	1.24984	6.71044	NaN
VIN3-1	2	18	18	3	9	S26 B9	S26,7,8 FP3	1.88	1.892	1.904	1.701	1.845	4.39e-07	3.9e-08	1.31e-07	5.73e-08	2.53e-11	1.31e-07	NaN	3.35423	0.298131	1.0036	0.437679	0.000192931	1.08635	0.92051	1.26676	0.103146	0.353748	3.0876	0.323876	0.792253	4.24329	0.000545391
VIN3-1	2	18	18	3	4	C2	S27 FP1	1.889	1.886	1.898	1.684	1.846	1.67e-09	5.14e-09	9.94e-09	1.98e-09	0	2.93e-09	Bad UBC	NaN	NaN	NaN	NaN	NaN	NaN	NaN	NaN	NaN	NaN	NaN	NaN	NaN	NaN	NaN
VIN3-1	2	18	18	2	14	D4	S27 FP1	1.889	1.886	1.898	1.684	1.846	1.38e-08	1.73e-08	2.94e-08	7.75e-09	7.32e-11	1.55e-08	Bad UBC	NaN	NaN	NaN	NaN	NaN	NaN	NaN	NaN	NaN	NaN	NaN	NaN	NaN	NaN	NaN
VIN3-1	2	18	18	2	3	E3	S27 FP1	1.889	1.886	1.898	1.684	1.846	6.57e-08	4.45e-08	6.66e-08	2.37e-08	7.3e-12	5.41e-08	NaN	1.21489	0.823122	1.23042	0.437905	0.000134888	1.18581	0.843303	1.17086	0.0708928	0.329303	1.02452	0.97607	1.05087	6.177	0.000409616
BRO	3	25	25	2	6	C2	SA2 FP1	1.86516	1.87824	1.88261	1.60706	1.80947	2.51e-06	5.79e-07	2.18e-06	6.5e-07	9.18e-09	1.2e-06	NaN	2.08181	0.480351	1.80616	0.539603	0.00761605	1.03694	0.964375	1.30048	0.404548	0.307802	2.00765	0.498096	1.38885	1.33384	0.0247433
BRO	3	25	25	1	24	H11	SA2 FP3	1.875	1.904	1.888	1.646	1.83	3.08e-07	7.62e-08	7.82e-07	3.07e-07	2.53e-09	1.53e-07	NaN	2.0098	0.497561	5.10142	2.00674	0.0165226	1.1766	0.849908	1.21772	0.195822	0.264952	1.70815	0.585429	4.18933	10.2478	0.0623609
BRO	3	25	25	2	20	G3	SA3 FP1	1.89205	1.89355	1.89836	1.75803	1.86576	5.13e-06	8.81e-07	6.52e-06	1.22e-07	9.59e-09	2.13e-06	NaN	2.41317	0.414393	3.06453	0.0575346	0.00450988	1.22252	0.817984	1.33144	0.0366091	0.300785	1.97393	0.506603	2.30167	1.57159	0.0149937
BRO	3	25	25	3	12	C5	SA3 FP2	1.891	1.88	1.906	1.679	1.862	2.45e-06	3.74e-07	2.45e-06	1.28e-07	6.89e-09	9.58e-07	NaN	2.56249	0.390246	2.56201	0.133985	0.00719535	1.10542	0.904638	1.08647	0.12873	0.274573	2.31812	0.431384	2.35811	1.04082	0.0262055
BRO	3	25	25	2	18	C6	SA3 FP2	1.891	1.88	1.906	1.679	1.862	3.65e-06	6.7e-07	4.25e-06	2.99e-07	1.03e-08	1.56e-06	NaN	2.33375	0.428495	2.71742	0.191367	0.00661644	1.10542	0.904638	1.08647	0.12873	0.274573	2.1112	0.473665	2.50115	1.48657	0.0240972
BRO	3	25	25	3	14	H6	SA4 FP2	1.90303	1.88082	1.89989	1.68512	1.86345	2.18e-06	2.91e-07	3.02e-06	2.17e-07	6.14e-09	7.96e-07	NaN	2.73764	0.365278	3.79765	0.272533	0.00770326	1.1967	0.835629	1.14411	0.126625	0.312368	2.28765	0.437129	3.31931	2.15228	0.0246609
EDI	3	25	25	1	6	G4	SA1 FP1	1.89793	1.9112	1.91557	1.63448	1.88312	9.11e-07	7.02e-07	1.26e-06	1.43e-06	1.76e-08	8e-07	NaN	1.13915	0.877851	1.58154	1.78969	0.0219499	1.16648	0.857281	1.18104	0.551543	0.278582	0.976568	1.02399	1.3391	3.24487	0.0787916
EDI	3	25	25	1	15	B8	SA1 FP2	1.88108	1.87202	1.89195	1.68745	1.85625	1.41e-06	6.94e-07	1.39e-06	2.47e-07	1.87e-08	9.9e-07	NaN	1.42538	0.701567	1.40221	0.249091	0.0188926	0.995604	1.00442	1.26557	0.102839	0.205655	1.43167	0.698484	1.10797	2.42215	0.0918658
EDI	3	25	25	2	1	F1	SA2 FP1	1.86516	1.87824	1.88261	1.60706	1.80947	3.29e-06	1.35e-06	3.19e-06	1.07e-06	2.54e-08	2.11e-06	NaN	1.55862	0.641594	1.50942	0.507493	0.0120452	1.03694	0.964375	1.30048	0.404548	0.307802	1.50309	0.665295	1.16066	1.25447	0.0391329
EDI	3	25	25	1	26	D7	SA2 FP2	1.884	1.879	1.897	1.705	1.852	1.73e-07	7.19e-08	3.13e-07	6.14e-08	6.14e-09	1.12e-07	NaN	1.55211	0.644282	2.80593	0.55049	0.0550423	1.08417	0.922366	1.16193	0.0810971	0.244553	1.43162	0.69851	2.41489	6.78803	0.225073
EDI	3	25	25	3	20	B2	SA4 FP1	1.895	1.884	1.9	1.717	1.856	2.65e-06	5.32e-07	2.24e-06	6.39e-08	1.65e-08	1.19e-06	NaN	2.23214	0.448	1.88805	0.0537616	0.0139065	1.14057	0.876753	1.23905	0.0691018	0.32793	1.95704	0.510976	1.52378	0.778007	0.0424069
EDI	3	25	25	3	23	E1	SA4 FP1	1.895	1.884	1.9	1.717	1.856	2.4e-06	2.73e-07	1.14e-06	4.77e-08	1.29e-08	8.09e-07	NaN	2.96118	0.337703	1.40469	0.0589919	0.0159929	1.14057	0.876753	1.23905	0.0691018	0.32793	2.59622	0.385175	1.13368	0.853696	0.0487694
EDIN	3	25	25	1	12	E2	SA1 FP1	1.89793	1.9112	1.91557	1.63448	1.88312	2.98e-07	3.01e-07	2.66e-07	3.15e-07	3.02e-09	3e-07	NaN	0.994155	1.00588	0.889271	1.05139	0.0100896	1.16648	0.857281	1.18104	0.551543	0.278582	0.85227	1.17334	0.752956	1.90627	0.0362176
EDIN	3	25	25	1	18	H3	SA1 FP1	1.89793	1.9112	1.91557	1.63448	1.88312	7.9e-07	3.92e-07	5.12e-07	7.04e-07	7.1e-09	5.57e-07	NaN	1.41914	0.704651	0.919875	1.26472	0.0127493	1.16648	0.857281	1.18104	0.551543	0.278582	1.2166	0.82196	0.778868	2.29305	0.0457649
EDIN	3	25	25	2	5	G12	SA2 FP3	1.875	1.904	1.888	1.646	1.83	2.28e-06	5.77e-07	1.24e-06	2.2e-07	8.6e-09	1.15e-06	NaN	1.98897	0.502773	1.07753	0.191874	0.0074996	1.1766	0.849908	1.21772	0.195822	0.264952	1.69044	0.591562	0.884875	0.979839	0.0283055
EDIN	3	25	25	3	17	F2	SA4 FP1	1.895	1.884	1.9	1.717	1.856	2.32e-06	4.47e-07	8.12e-07	1.69e-08	1.24e-08	1.02e-06	NaN	2.2779	0.439	0.797052	0.0165963	0.0121371	1.14057	0.876753	1.23905	0.0691018	0.32793	1.99716	0.500712	0.643277	0.240172	0.0370112
EDIN	3	25	25	3	28	D10	SA4 FP3	1.891	1.881	1.9	1.739	1.87	2.52e-06	4.67e-07	5.62e-07	2.04e-08	1.06e-08	1.08e-06	NaN	2.32245	0.43058	0.518873	0.0188345	0.00980275	1.08237	0.923895	1.18757	0.0436103	0.241931	2.1457	0.466049	0.436921	0.431883	0.0405188
LOV	3	25	25	1	17	B2	SA1 FP1	1.89793	1.9112	1.91557	1.63448	1.88312	1.23e-06	3.63e-07	1.76e-06	2.81e-06	1.27e-08	6.68e-07	NaN	1.84269	0.542684	2.63059	4.2011	0.0189427	1.16648	0.857281	1.18104	0.551543	0.278582	1.57971	0.633029	2.22735	7.61699	0.067997
LOV	3	25	25	1	11	D9	SA1 FP3	1.89706	1.86936	1.88908	1.66336	1.82491	7.54e-07	6.19e-07	2.36e-06	4.74e-07	1.05e-08	6.83e-07	NaN	1.10333	0.906349	3.45777	0.694027	0.0153545	0.918119	1.08918	1.27429	0.167865	0.299425	1.20173	0.832136	2.71349	4.13443	0.05128
LOV	3	25	25	2	8	G1	SA2 FP1	1.86516	1.87824	1.88261	1.60706	1.80947	4.9e-06	1.95e-06	1.01e-05	3.12e-06	3.68e-08	3.09e-06	NaN	1.58556	0.630693	3.2657	1.0098	0.01191	1.03694	0.964375	1.30048	0.404548	0.307802	1.52907	0.653991	2.51116	2.49613	0.0386937
LOV	3	25	25	2	15	H4	SA2 FP1	1.86516	1.87824	1.88261	1.60706	1.80947	1.6e-06	6.47e-07	2.68e-06	7.99e-07	1.07e-08	1.02e-06	NaN	1.57227	0.636023	2.63234	0.785575	0.0105277	1.03694	0.964375	1.30048	0.404548	0.307802	1.51626	0.659518	2.02413	1.94186	0.0342029
LOV	3	25	25	3	5	C3	SA3 FP1	1.89205	1.89355	1.89836	1.75803	1.86576	5.37e-06	9.9e-07	8.17e-06	1.81e-07	2.18e-08	2.31e-06	NaN	2.32913	0.429344	3.54149	0.0783809	0.00946742	1.22252	0.817984	1.33144	0.0366091	0.300785	1.90519	0.524881	2.65989	2.14102	0.0314757
LOV	3	25	25	3	11	D3	SA3 FP1	1.89205	1.89355	1.89836	1.75803	1.86576	5.58e-06	1.08e-06	6.37e-06	1.78e-07	2.62e-08	2.46e-06	NaN	2.26887	0.440748	2.59001	0.0724055	0.0106495	1.22252	0.817984	1.33144	0.0366091	0.300785	1.8559	0.538823	1.94527	1.9778	0.0354058
NIL2	3	25	25	1	8	E11	SA1 FP3	1.89706	1.86936	1.88908	1.66336	1.82491	9.52e-07	3.34e-07	8.77e-07	2.52e-07	4.96e-09	5.64e-07	NaN	1.68856	0.592221	1.555	0.446348	0.00880332	0.918119	1.08918	1.27429	0.167865	0.299425	1.83915	0.54373	1.22029	2.65897	0.0294008
NIL2	3	25	25	1	4	E12	SA1 FP3	1.89706	1.86936	1.88908	1.66336	1.82491	3.03e-07	1.79e-07	8.97e-07	2.07e-07	5.23e-09	2.33e-07	NaN	1.29974	0.769385	3.84617	0.886498	0.0224529	0.918119	1.08918	1.27429	0.167865	0.299425	1.41566	0.706387	3.01829	5.28101	0.0749866
NIL2	3	25	25	1	22	B11	SA2 FP3	1.875	1.904	1.888	1.646	1.83	5.6e-07	3.89e-07	1.43e-06	2.67e-07	5.4e-09	4.67e-07	NaN	1.19903	0.834006	3.05465	0.572038	0.0115766	1.1766	0.849908	1.21772	0.195822	0.264952	1.01907	0.98129	2.5085	2.92121	0.0436934
NIL2	3	25	25	2	11	E12	SA2 FP3	1.875	1.904	1.888	1.646	1.83	3.44e-06	5.56e-07	2.37e-06	3.64e-07	7.01e-09	1.38e-06	NaN	2.48789	0.401948	1.7122	0.262831	0.00506614	1.1766	0.849908	1.21772	0.195822	0.264952	2.11447	0.472931	1.40607	1.34219	0.019121
NIL2	3	25	25	3	6	D7	SA3 FP2	1.891	1.88	1.906	1.679	1.862	2.64e-06	4.46e-07	1.98e-06	2.39e-07	1.06e-08	1.08e-06	NaN	2.43093	0.411365	1.82912	0.219977	0.0097467	1.10542	0.904638	1.08647	0.12873	0.274573	2.19911	0.454729	1.68354	1.70882	0.0354976
NIL2	3	25	25	3	21	G7	SA4 FP2	1.90303	1.88082	1.89989	1.68512	1.86345	2.13e-06	4.08e-07	1.27e-06	7.35e-08	6.6e-09	9.33e-07	NaN	2.28645	0.437358	1.36534	0.0787943	0.00707572	1.1967	0.835629	1.14411	0.126625	0.312368	1.91063	0.523388	1.19336	0.622264	0.0226519
SF2	3	25	25	3	15	E2	S26 FP1	1.892	1.883	1.898	1.673	1.838	2.9e-06	5.2e-07	8.97e-07	4.1e-08	8.14e-09	1.23e-06	NaN	2.35979	0.423767	0.730771	0.0334021	0.00663702	1.16497	0.858394	1.29943	0.114311	0.403842	2.02563	0.493674	0.56238	0.292204	0.0164347
SF2	3	25	25	2	9	G1	S26 FP1	1.892	1.883	1.898	1.673	1.838	4.01e-06	6.54e-07	1.48e-06	1.52e-07	7.52e-09	1.62e-06	NaN	2.47645	0.403804	0.914857	0.093764	0.00464118	1.16497	0.858394	1.29943	0.114311	0.403842	2.12577	0.470418	0.704047	0.820255	0.0114926
SF2	3	25	25	3	2	C8	S26 FP2	1.886	1.89	1.902	1.701	1.854	2.09e-06	4.3e-07	7.22e-07	4.16e-08	5.39e-09	9.47e-07	NaN	2.20284	0.45396	0.762082	0.0439226	0.00569323	1.18581	0.843303	1.17086	0.0708928	0.329303	1.85766	0.538312	0.650873	0.619563	0.0172887
SF2	3	25	25	1	25	F1	S27 FP1	1.889	1.886	1.898	1.684	1.846	2.49e-06	5.29e-07	7.52e-07	1.47e-07	9.51e-09	1.15e-06	NaN	2.1694	0.460956	0.655504	0.128292	0.00828631	1.18581	0.843303	1.17086	0.0708928	0.329303	1.82947	0.546608	0.559847	1.80966	0.0251632
SF2	3	25	25	1	5	G4	S27 FP1	1.889	1.886	1.898	1.684	1.846	3.21e-07	1.76e-07	4.4e-07	1.04e-07	1.8e-09	2.37e-07	NaN	1.34981	0.740842	1.85459	0.43992	0.00757917	1.18581	0.843303	1.17086	0.0708928	0.329303	1.1383	0.878501	1.58395	6.20542	0.0230158
SF2	3	25	25	3	16	B3	S26 FP1	1.892	1.883	1.898	1.673	1.838	7.22e-07	3.07e-07	1.97e-07	9.67e-09	1.48e-09	4.71e-07	NaN	1.53429	0.651769	0.41878	0.0205505	0.00314839	1.16497	0.858394	1.29943	0.114311	0.403842	1.31702	0.759289	0.322281	0.179778	0.00779609
ULL	3	25	25	1	10	E5	SA1 FP2	1.88108	1.87202	1.89195	1.68745	1.85625	5.85e-07	3.14e-07	1.51e-06	2.16e-07	3.75e-09	4.29e-07	NaN	1.36543	0.732372	3.5263	0.502737	0.00873795	0.995604	1.00442	1.26557	0.102839	0.205655	1.37146	0.729152	2.78634	4.8886	0.0424885
ULL	3	25	25	1	1	D12	SA1 FP3	1.89706	1.86936	1.88908	1.66336	1.82491	1.09e-07	5.52e-08	3.22e-07	1.33e-07	1.53e-09	7.76e-08	NaN	1.40531	0.711584	4.14475	1.7199	0.0197242	0.918119	1.08918	1.27429	0.167865	0.299425	1.53065	0.653319	3.2526	10.2457	0.0658736
ULL	3	25	25	1	23	B5	SA2 FP2	1.884	1.879	1.897	1.705	1.852	6.01e-07	1.67e-07	4.18e-07	4.96e-08	4.59e-09	3.17e-07	NaN	1.89608	0.527403	1.31841	0.156492	0.0144815	1.08417	0.922366	1.16193	0.0810971	0.244553	1.74888	0.571793	1.13467	1.92969	0.0592163
ULL	3	25	25	2	24	B4	SA3 FP1	1.89205	1.89355	1.89836	1.75803	1.86576	2.2e-06	1.31e-07	1.06e-06	3.53e-08	3.54e-09	5.37e-07	NaN	4.08925	0.244544	1.96718	0.0657581	0.00658662	1.22252	0.817984	1.33144	0.0366091	0.300785	3.34494	0.298959	1.47748	1.79622	0.0218981
ULL	3	25	25	3	10	F11	SA3 FP3	1.916	1.884	1.9	1.693	1.853	1.61e-06	3.52e-07	1.8e-06	1.2e-07	7.2e-09	7.54e-07	NaN	2.14041	0.467199	2.38397	0.159192	0.00954856	0.947537	1.05537	1.40604	0.122656	0.34761	2.25892	0.442689	1.69552	1.29788	0.0274691
ULLN	3	25	25	1	3	G8	SA1 FP2	1.88108	1.87202	1.89195	1.68745	1.85625	1.31e-06	8.12e-07	1.52e-06	2.84e-07	4.44e-09	1.03e-06	NaN	1.26885	0.788116	1.4751	0.275942	0.00431	0.995604	1.00442	1.26557	0.102839	0.205655	1.27445	0.784652	1.16557	2.68325	0.0209575
ULLN	3	25	25	1	7	H11	SA1 FP3	1.89706	1.86936	1.88908	1.66336	1.82491	1.53e-06	9.8e-07	1.45e-06	4.17e-07	1.06e-08	1.22e-06	NaN	1.24791	0.801341	1.18228	0.341116	0.00865803	0.918119	1.08918	1.27429	0.167865	0.299425	1.3592	0.735726	0.927794	2.03208	0.0289155
ULLN	3	25	25	1	27	G6	SA2 FP2	1.884	1.879	1.897	1.705	1.852	4.98e-07	2.11e-07	5.07e-07	7.88e-08	2.46e-09	3.24e-07	NaN	1.53567	0.651182	1.56329	0.243111	0.00758187	1.08417	0.922366	1.16193	0.0810971	0.244553	1.41645	0.70599	1.34543	2.99778	0.0310029
ULLN	3	25	25	2	19	B3	SA3 FP1	1.89205	1.89355	1.89836	1.75803	1.86576	2.45e-06	6.21e-07	2.42e-06	7.17e-08	4.73e-09	1.23e-06	NaN	1.98465	0.503867	1.96065	0.0581138	0.00383751	1.22252	0.817984	1.33144	0.0366091	0.300785	1.62341	0.615987	1.47258	1.58742	0.0127583
ULLN	3	25	25	2	23	C4	SA3 FP1	1.89205	1.89355	1.89836	1.75803	1.86576	1.47e-06	2.5e-07	1.12e-06	2.27e-08	3.7e-09	6.07e-07	NaN	2.42648	0.41212	1.85008	0.0374188	0.00608641	1.22252	0.817984	1.33144	0.0366091	0.300785	1.98482	0.503824	1.38953	1.02212	0.0202351
ULLN	3	25	25	3	26	E5	SA4 FP2	1.90303	1.88082	1.89989	1.68512	1.86345	2.2e-06	9.69e-07	1.45e-06	8.99e-08	9.26e-09	1.46e-06	NaN	1.50707	0.663538	0.990847	0.0615682	0.00634583	1.1967	0.835629	1.14411	0.126625	0.312368	1.25935	0.794058	0.866041	0.486224	0.0203152
VAR	3	25	25	1	14	F6	SA1 FP2	1.88108	1.87202	1.89195	1.68745	1.85625	6.68e-07	2.36e-07	1.32e-06	2.13e-07	8.15e-10	3.97e-07	NaN	1.68222	0.594451	3.32922	0.536489	0.00205234	0.995604	1.00442	1.26557	0.102839	0.205655	1.68965	0.591838	2.63062	5.2168	0.00997953
VAR	3	25	25	1	20	G12	SA1 FP3	1.89706	1.86936	1.88908	1.66336	1.82491	3.51e-07	1.43e-07	1.54e-06	2.75e-07	2e-09	2.24e-07	NaN	1.56869	0.637474	6.87085	1.22944	0.00892598	0.918119	1.08918	1.27429	0.167865	0.299425	1.70859	0.585277	5.39191	7.324	0.0298104
VAR	3	25	25	2	7	D6	SA2 FP2	1.884	1.879	1.897	1.705	1.852	2.75e-06	6.01e-07	4.18e-06	1.91e-07	2.72e-09	1.29e-06	NaN	2.14048	0.467185	3.24939	0.148243	0.00211663	1.08417	0.922366	1.16193	0.0810971	0.244553	1.97431	0.506507	2.79655	1.82796	0.0086551
VAR	3	25	25	2	27	B9	SA3 FP3	1.916	1.884	1.9	1.693	1.853	2.88e-06	1.43e-06	8.49e-06	1.23e-06	7.91e-09	2.03e-06	NaN	1.41779	0.705321	4.17533	0.604771	0.00388815	0.947537	1.05537	1.40604	0.122656	0.34761	1.49629	0.668318	2.96957	4.93064	0.0111854
VAR	3	25	25	3	24	C1	SA4 FP1	1.895	1.884	1.9	1.717	1.856	1.27e-06	1.85e-07	1.19e-06	6.02e-08	4.28e-09	4.84e-07	NaN	2.61942	0.381764	2.45982	0.124431	0.00885102	1.14057	0.876753	1.23905	0.0691018	0.32793	2.29658	0.43543	1.98525	1.8007	0.0269906
VAR	3	25	25	3	25	E4	SA4 FP1	1.895	1.884	1.9	1.717	1.856	2.53e-06	9.45e-07	6.75e-06	1.1e-07	4.86e-09	1.55e-06	NaN	1.63729	0.610765	4.36266	0.0707552	0.00313693	1.14057	0.876753	1.23905	0.0691018	0.32793	1.4355	0.696622	3.52097	1.02393	0.00956586
VARN	3	25	25	1	28	E5	SA2 FP2	1.884	1.879	1.897	1.705	1.852	3.87e-07	7.77e-08	5.95e-07	1.11e-07	2.48e-09	1.73e-07	NaN	2.23126	0.448177	3.43374	0.640165	0.0143054	1.08417	0.922366	1.16193	0.0810971	0.244553	2.05804	0.485899	2.95521	7.89381	0.0584962
VARN	3	25	25	2	16	F10	SA2 FP3	1.875	1.904	1.888	1.646	1.83	2.59e-06	1.18e-06	6.62e-06	6.75e-07	1.13e-08	1.75e-06	NaN	1.48178	0.674865	3.78442	0.385569	0.00644285	1.1766	0.849908	1.21772	0.195822	0.264952	1.25937	0.794045	3.10779	1.96898	0.0243171
VARN	3	25	25	3	13	B6	SA3 FP2	1.891	1.88	1.906	1.679	1.862	1.91e-06	2.17e-07	1.41e-06	1.08e-07	3.89e-09	6.42e-07	NaN	2.96707	0.337033	2.1979	0.167445	0.00605763	1.10542	0.904638	1.08647	0.12873	0.274573	2.68413	0.372561	2.02297	1.30074	0.022062
VARN	3	25	25	3	3	B10	SA3 FP3	1.916	1.884	1.9	1.693	1.853	1.5e-06	8.37e-07	2.56e-06	2.97e-07	7.58e-09	1.12e-06	NaN	1.34086	0.745791	2.2804	0.264883	0.00675526	0.947537	1.05537	1.40604	0.122656	0.34761	1.4151	0.706665	1.62186	2.15957	0.0194334
VARN	3	25	25	3	8	B11	SA3 FP3	1.916	1.884	1.9	1.693	1.853	1.87e-06	5.87e-07	1.51e-06	9.72e-08	1.92e-09	1.05e-06	NaN	1.78393	0.560559	1.44326	0.0928802	0.00183176	0.947537	1.05537	1.40604	0.122656	0.34761	1.88271	0.531151	1.02647	0.757244	0.00526957
VARN	3	25	25	3	27	E6	SA4 FP2	1.90303	1.88082	1.89989	1.68512	1.86345	3.35e-06	9.91e-07	3.61e-06	2.1e-07	1.24e-08	1.82e-06	NaN	1.83999	0.54348	1.97959	0.115313	0.00679546	1.1967	0.835629	1.14411	0.126625	0.312368	1.53755	0.650385	1.73024	0.910665	0.0217547
VIN3-1	3	25	25	3	1	D5	S26 FP2	1.886	1.89	1.902	1.701	1.854	1.64e-06	2.64e-07	1.12e-06	6.83e-08	1.78e-10	6.59e-07	NaN	2.49245	0.401212	1.70118	0.103656	0.000270114	1.18581	0.843303	1.17086	0.0708928	0.329303	2.10189	0.475763	1.45293	1.46215	0.000820261
VIN3-1	3	25	25	2	12	E1	S27 FP1	1.889	1.886	1.898	1.684	1.846	1.1e-06	4.3e-07	6.1e-07	6.5e-08	3.5e-10	6.88e-07	NaN	1.60223	0.624131	0.885566	0.0944633	0.00050774	1.18581	0.843303	1.17086	0.0708928	0.329303	1.35116	0.740102	0.756337	1.33248	0.00154186
VIN3-1	3	25	25	3	7	E4	S27 FP1	1.889	1.886	1.898	1.684	1.846	1.45e-06	4.82e-07	1e-06	1.36e-07	1.83e-09	8.35e-07	NaN	1.73244	0.577221	1.19861	0.163244	0.00218493	1.18581	0.843303	1.17086	0.0708928	0.329303	1.46097	0.684476	1.0237	2.30269	0.00663501
VIN3-1	3	25	25	2	21	H3	S27 FP1	1.889	1.886	1.898	1.684	1.846	3.27e-06	9.49e-07	1.3e-06	8.6e-08	4.48e-10	1.76e-06	NaN	1.85733	0.538408	0.735658	0.048805	0.000254176	1.18581	0.843303	1.17086	0.0708928	0.329303	1.56629	0.638451	0.628305	0.688433	0.000771859
VIN3-1	3	25	25	2	28	B7	S27 FP2	1.892	1.887	1.903	1.708	1.887	8.29e-07	3.36e-07	2.99e-07	2.76e-08	1.3e-10	5.28e-07	NaN	1.57227	0.636025	0.566	0.0522297	0.000247222	1.15614	0.864949	1.2476	0.0563462	0.18217	1.35993	0.735332	0.45367	0.926942	0.00135709
VIN3-1	3	25	25	1	19	F7	S27 FP2	1.892	1.887	1.903	1.708	1.887	1.59e-06	5.38e-07	5.81e-07	6.89e-08	9.07e-11	9.24e-07	NaN	1.71641	0.582613	0.628927	0.0745914	9.82e-05	1.15614	0.864949	1.2476	0.0563462	0.18217	1.4846	0.67358	0.504109	1.3238	0.000538944
SF2	4	32	32	2	3	B8	S26 FP2	1.886	1.89	1.902	1.701	1.854	1.08e-06	7.58e-07	1.43e-06	3.55e-08	2e-09	9.05e-07	NaN	1.1942	0.83738	1.57653	0.0391784	0.00221225	1.18581	0.843303	1.17086	0.0708928	0.329303	1.00707	0.992976	1.34647	0.552643	0.00671797
SF2	4	32	32	3	4	E5	S26 FP2	1.886	1.89	1.902	1.701	1.854	1.01e-06	1.06e-07	3.86e-07	1.74e-08	1.99e-09	3.28e-07	NaN	3.09186	0.32343	1.17722	0.0529497	0.00605837	1.18581	0.843303	1.17086	0.0708928	0.329303	2.60737	0.383528	1.00543	0.746898	0.0183976
SF2	4	32	32	2	15	S27 C9	S26,7,8 FP3	1.88	1.892	1.904	1.701	1.845	1.55e-06	3.95e-07	7.9e-07	7.37e-08	3.28e-09	7.83e-07	NaN	1.98314	0.504251	1.00874	0.0941702	0.00418504	1.08635	0.92051	1.26676	0.103146	0.353748	1.8255	0.547795	0.796315	0.91298	0.0118305
SF2	4	32	32	3	2	C5	S27 FP2	1.892	1.887	1.903	1.708	1.887	1.11e-06	6.42e-07	1.16e-06	5.14e-08	2.13e-09	8.42e-07	NaN	1.31285	0.761702	1.37339	0.0610274	0.00252487	1.15614	0.864949	1.2476	0.0563462	0.18217	1.13555	0.880633	1.10083	1.08308	0.0138599
SF2	4	32	32	1	20	H7	S27 FP2	1.892	1.887	1.903	1.708	1.887	1.12e-06	1.88e-07	3.35e-07	1.14e-08	1.22e-09	4.6e-07	NaN	2.44635	0.408773	0.72953	0.0248763	0.00264498	1.15614	0.864949	1.2476	0.0563462	0.18217	2.11596	0.472598	0.584746	0.441491	0.0145193
VIN3-1	4	32	32	2	19	E6	S26 FP2	1.886	1.89	1.902	1.701	1.854	6.1e-07	4.16e-07	8.51e-07	3.81e-08	8.61e-11	5.04e-07	NaN	1.21062	0.826021	1.69003	0.0756629	0.000171043	1.18581	0.843303	1.17086	0.0708928	0.329303	1.02092	0.979507	1.44341	1.06729	0.00051941
VIN3-1	4	32	32	3	11	G5	S26 FP2	1.886	1.89	1.902	1.701	1.854	2.59e-06	2.96e-07	8.01e-07	3.79e-08	3.8e-10	8.75e-07	NaN	2.95892	0.337962	0.915155	0.0433333	0.000434011	1.18581	0.843303	1.17086	0.0708928	0.329303	2.49526	0.400759	0.781608	0.61125	0.00131797
VIN3-1	4	32	32	3	26	H5	S26 FP2	1.886	1.89	1.902	1.701	1.854	2.49e-06	2.9e-07	6.62e-07	2.94e-08	1.69e-10	8.5e-07	NaN	2.93272	0.34098	0.779081	0.03457	0.000198949	1.18581	0.843303	1.17086	0.0708928	0.329303	2.47317	0.404339	0.665391	0.487637	0.000604151
VIN3-1	4	32	32	3	7	D1	S27 FP1	1.889	1.886	1.898	1.684	1.846	1.85e-06	4e-07	1.35e-06	1.02e-07	3.64e-10	8.59e-07	NaN	2.14989	0.465139	1.57282	0.118662	0.000423688	1.18581	0.843303	1.17086	0.0708928	0.329303	1.81301	0.551568	1.3433	1.67382	0.00128662
VIN3-1	4	32	32	3	3	G2	S27 FP1	1.889	1.886	1.898	1.684	1.846	2.83e-14	1.92e-12	6.55e-13	0	2.81e-13	2.33e-13	Bad UBC	NaN	NaN	NaN	NaN	NaN	NaN	NaN	NaN	NaN	NaN	NaN	NaN	NaN	NaN	NaN
BRO	5	39	39	1	15	B1	SA1 FP1	1.89793	1.9112	1.91557	1.63448	1.88312	3.07e-06	7.69e-07	3.53e-06	2.04e-06	1.17e-08	1.54e-06	NaN	1.99702	0.500746	2.29997	1.32701	0.00765198	1.16648	0.857281	1.18104	0.551543	0.278582	1.71201	0.58411	1.94741	2.406	0.0274676
BRO	5	39	39	1	3	D2	SA1 FP1	1.89793	1.9112	1.91557	1.63448	1.88312	3.31e-06	1.22e-06	4.44e-06	3.54e-06	2.69e-08	2.01e-06	NaN	1.64367	0.608396	2.20702	1.75908	0.0133867	1.16648	0.857281	1.18104	0.551543	0.278582	1.40908	0.709681	1.86871	3.18938	0.0480529
BRO	5	39	39	2	13	F3	SA2 FP1	1.86516	1.87824	1.88261	1.60706	1.80947	3.33e-06	8.49e-07	4.53e-06	1.5e-06	2.73e-08	1.68e-06	NaN	1.97946	0.505189	2.69758	0.892639	0.01623	1.03694	0.964375	1.30048	0.404548	0.307802	1.90894	0.523851	2.0743	2.20651	0.0527288
BRO	5	39	39	2	26	H10	SA3 FP3	1.916	1.884	1.9	1.693	1.853	2.16e-06	3.17e-07	2.26e-06	3.95e-07	3.43e-08	8.28e-07	NaN	2.61247	0.382779	2.73109	0.47732	0.041487	0.947537	1.05537	1.40604	0.122656	0.34761	2.75712	0.362697	1.9424	3.89155	0.119349
BRO	5	39	39	3	25	E11	SA4 FP3	1.891	1.881	1.9	1.739	1.87	1.24e-06	5.19e-07	3.55e-06	6.74e-08	5.6e-08	8.02e-07	NaN	1.5455	0.647039	4.42661	0.0840291	0.0698304	1.08237	0.923895	1.18757	0.0436103	0.241931	1.42788	0.700338	3.72746	1.92682	0.288638
BRO	5	39	39	3	13	F9	SA4 FP3	1.891	1.881	1.9	1.739	1.87	1.74e-06	3.14e-07	4.38e-07	8.82e-09	1.11e-08	7.39e-07	NaN	2.35127	0.425302	0.592508	0.0119344	0.0149633	1.08237	0.923895	1.18757	0.0436103	0.241931	2.17233	0.460336	0.498926	0.273661	0.0618496
EDI	5	39	39	1	13	C9	SA1 FP3	1.89706	1.86936	1.88908	1.66336	1.82491	2.17e-06	2.24e-06	3.34e-06	2.19e-07	8.28e-08	2.2e-06	NaN	0.983783	1.01648	1.51829	0.0992988	0.0376164	0.918119	1.08918	1.27429	0.167865	0.299425	1.07152	0.933253	1.19148	0.591539	0.125629
EDI	5	39	39	1	25	G7	SA2 FP2	1.884	1.879	1.897	1.705	1.852	1.52e-06	6.1e-07	1.38e-06	7.6e-08	3.17e-08	9.63e-07	NaN	1.58062	0.632665	1.43085	0.0789006	0.0328575	1.08417	0.922366	1.16193	0.0810971	0.244553	1.45791	0.685915	1.23145	0.972915	0.134357
EDI	5	39	39	2	12	H6	SA2 FP2	1.884	1.879	1.897	1.705	1.852	1.79e-06	3.49e-07	7.59e-07	5.84e-08	5.08e-08	7.91e-07	NaN	2.26472	0.441555	0.959186	0.0738765	0.0642283	1.08417	0.922366	1.16193	0.0810971	0.244553	2.0889	0.47872	0.825513	0.910964	0.262635
EDI	5	39	39	3	2	D4	SA3 FP1	1.89205	1.89355	1.89836	1.75803	1.86576	2.92e-06	3.69e-07	1.88e-06	4.02e-08	5.62e-08	1.04e-06	NaN	2.8151	0.355227	1.80985	0.0387804	0.0541543	1.22252	0.817984	1.33144	0.0366091	0.300785	2.30271	0.434272	1.35932	1.05931	0.180043
EDI	5	39	39	2	28	B8	SA3 FP2	1.891	1.88	1.906	1.679	1.862	3.26e-06	4.15e-07	1.63e-06	1.72e-07	7.17e-08	1.16e-06	NaN	2.80283	0.356782	1.40303	0.147687	0.0616714	1.10542	0.904638	1.08647	0.12873	0.274573	2.53555	0.394392	1.29136	1.14726	0.224608
EDI	5	39	39	3	9	F11	SA4 FP3	1.891	1.881	1.9	1.739	1.87	2.54e-06	5.29e-07	1.56e-06	4.63e-08	7.37e-08	1.16e-06	NaN	2.19186	0.456234	1.34631	0.0399165	0.0635608	1.08237	0.923895	1.18757	0.0436103	0.241931	2.02505	0.493816	1.13367	0.9153	0.262723
EDIN	5	39	39	1	5	E4	SA1 FP1	1.89793	1.9112	1.91557	1.63448	1.88312	2.82e-06	1.02e-06	9.54e-07	5.29e-07	1.53e-08	1.69e-06	NaN	1.66478	0.600679	0.563491	0.312164	0.00905898	1.16648	0.857281	1.18104	0.551543	0.278582	1.42719	0.70068	0.477114	0.565983	0.0325182
EDIN	5	39	39	1	12	H5	SA1 FP2	1.88108	1.87202	1.89195	1.68745	1.85625	1.05e-06	1.01e-06	8.38e-07	3.88e-08	2.16e-08	1.03e-06	NaN	1.0187	0.981645	0.816168	0.0377868	0.0210327	0.995604	1.00442	1.26557	0.102839	0.205655	1.0232	0.97733	0.644904	0.367437	0.102272
EDIN	5	39	39	1	7	C11	SA1 FP3	1.89706	1.86936	1.88908	1.66336	1.82491	3.13e-06	1.35e-06	1.21e-06	1.03e-07	3.07e-08	2.05e-06	NaN	1.52454	0.655933	0.587965	0.0503931	0.0149461	0.918119	1.08918	1.27429	0.167865	0.299425	1.66051	0.602225	0.461407	0.3002	0.0499159
EDIN	5	39	39	1	20	C11	SA2 FP3	1.875	1.904	1.888	1.646	1.83	1.88e-06	8.36e-07	9.03e-07	5.74e-08	1.39e-08	1.25e-06	NaN	1.49958	0.666853	0.720663	0.0457871	0.0110662	1.1766	0.849908	1.21772	0.195822	0.264952	1.27451	0.784618	0.591814	0.23382	0.0417667
EDIN	5	39	39	1	16	F9	SA2 FP3	1.875	1.904	1.888	1.646	1.83	3.85e-06	1.08e-06	1.27e-06	1.94e-07	5.48e-08	2.04e-06	NaN	1.88658	0.530059	0.621058	0.0948266	0.0268425	1.1766	0.849908	1.21772	0.195822	0.264952	1.60342	0.623667	0.510018	0.484249	0.101311
EDIN	5	39	39	3	4	H8	SA3 FP2	1.891	1.88	1.906	1.679	1.862	2.51e-06	5.62e-07	8.58e-07	6.01e-08	8.28e-08	1.19e-06	NaN	2.1141	0.473015	0.72169	0.0506053	0.0696965	1.10542	0.904638	1.08647	0.12873	0.274573	1.91249	0.522878	0.664253	0.393111	0.253836
LOV	5	39	39	1	14	H1	SA1 FP1	1.89793	1.9112	1.91557	1.63448	1.88312	4.06e-07	2.44e-07	1.08e-06	7.28e-07	1.37e-08	3.14e-07	NaN	1.29039	0.77496	3.44761	2.31738	0.0434942	1.16648	0.857281	1.18104	0.551543	0.278582	1.10623	0.903975	2.91913	4.20162	0.156127
LOV	5	39	39	1	11	G6	SA1 FP2	1.88108	1.87202	1.89195	1.68745	1.85625	9.86e-07	2.13e-07	8.17e-07	7.68e-08	7.66e-09	4.59e-07	NaN	2.15052	0.465004	1.78118	0.167592	0.0167098	0.995604	1.00442	1.26557	0.102839	0.205655	2.16001	0.46296	1.40742	1.62966	0.081252
LOV	5	39	39	1	2	B12	SA1 FP3	1.89706	1.86936	1.88908	1.66336	1.82491	2.9e-06	1e-06	4.96e-06	4.78e-07	2.35e-08	1.7e-06	NaN	1.70159	0.587687	2.91207	0.280843	0.0138189	0.918119	1.08918	1.27429	0.167865	0.299425	1.85334	0.539567	2.28525	1.67303	0.0461513
LOV	5	39	39	2	8	H7	SA2 FP2	1.884	1.879	1.897	1.705	1.852	4.17e-06	1.36e-06	5.4e-06	3.88e-07	1.15e-07	2.38e-06	NaN	1.75255	0.570597	2.27094	0.163301	0.0483989	1.08417	0.922366	1.16193	0.0810971	0.244553	1.61649	0.618623	1.95446	2.01364	0.197907
LOV	5	39	39	2	17	B5	SA3 FP2	1.891	1.88	1.906	1.679	1.862	2.11e-06	4.74e-07	2.22e-06	1.64e-07	2.59e-08	1e-06	NaN	2.11007	0.473917	2.22081	0.164238	0.0259396	1.10542	0.904638	1.08647	0.12873	0.274573	1.90885	0.523875	2.04406	1.27583	0.0944724
LOV	5	39	39	3	16	C3	SA4 FP1	1.895	1.884	1.9	1.717	1.856	2.37e-06	4.26e-07	2.13e-06	1.22e-07	7.08e-08	1e-06	NaN	2.35929	0.423857	2.11651	0.121706	0.0704808	1.14057	0.876753	1.23905	0.0691018	0.32793	2.06851	0.48344	1.70817	1.76126	0.214927
NIL2	5	39	39	1	1	H10	SA1 FP3	1.89706	1.86936	1.88908	1.66336	1.82491	2.73e-06	9.57e-07	3.28e-06	4.03e-07	5.06e-08	1.61e-06	NaN	1.68792	0.592446	2.02977	0.249454	0.0313511	0.918119	1.08918	1.27429	0.167865	0.299425	1.83845	0.543936	1.59287	1.48604	0.104704
NIL2	5	39	39	2	3	D2	SA2 FP1	1.86516	1.87824	1.88261	1.60706	1.80947	6.88e-07	2.32e-07	5.33e-07	2.07e-07	1.23e-08	3.99e-07	NaN	1.72209	0.58069	1.33475	0.519443	0.0309108	1.03694	0.964375	1.30048	0.404548	0.307802	1.66074	0.602141	1.02635	1.28401	0.100424
NIL2	5	39	39	2	27	F4	SA3 FP1	1.89205	1.89355	1.89836	1.75803	1.86576	4.13e-06	8.23e-07	1.8e-06	4.86e-08	3.53e-08	1.84e-06	NaN	2.23983	0.446463	0.977731	0.0263587	0.0191848	1.22252	0.817984	1.33144	0.0366091	0.300785	1.83214	0.545809	0.734341	0.720004	0.0637824
NIL2	5	39	39	2	20	F6	SA3 FP2	1.891	1.88	1.906	1.679	1.862	2.03e-06	5.78e-07	1.44e-06	8.19e-08	1.95e-08	1.08e-06	NaN	1.87462	0.533441	1.32507	0.075545	0.0180285	1.10542	0.904638	1.08647	0.12873	0.274573	1.69585	0.589674	1.21961	0.586846	0.0656599
NIL2	5	39	39	2	18	E9	SA3 FP3	1.916	1.884	1.9	1.693	1.853	1.5e-06	6.37e-07	2.21e-06	1.87e-07	4.09e-08	9.78e-07	NaN	1.53396	0.651906	2.25595	0.191402	0.0418745	0.947537	1.05537	1.40604	0.122656	0.34761	1.6189	0.617705	1.60447	1.56048	0.120464
NIL2	5	39	39	3	26	F5	SA4 FP2	1.90303	1.88082	1.89989	1.68512	1.86345	2.43e-06	9.95e-07	2.23e-06	1.64e-07	3.91e-08	1.56e-06	NaN	1.56377	0.639481	1.43254	0.105592	0.0251424	1.1967	0.835629	1.14411	0.126625	0.312368	1.30673	0.76527	1.25209	0.833891	0.0804897
SF2	5	39	39	3	27	D1	S26 FP1	1.892	1.883	1.898	1.673	1.838	2.99e-07	2.17e-07	1.84e-07	1.33e-08	4.67e-09	2.55e-07	NaN	1.17335	0.85226	0.720656	0.0521123	0.0183516	1.16497	0.858394	1.29943	0.114311	0.403842	1.0072	0.992854	0.554595	0.455883	0.0454425
SF2	5	39	39	1	22	G8	S26 FP2	1.886	1.89	1.902	1.701	1.854	7.62e-07	1.27e-07	4.3e-07	2.78e-08	1.28e-08	3.12e-07	NaN	2.44521	0.408963	1.38189	0.0892228	0.0411431	1.18581	0.843303	1.17086	0.0708928	0.329303	2.06205	0.484954	1.18023	1.25856	0.12494
SF2	5	39	39	3	12	S26 H9	S26,7,8 FP3	1.88	1.892	1.904	1.701	1.845	1.1e-06	4.5e-07	7.65e-07	4.83e-08	2.79e-08	7.02e-07	NaN	1.5607	0.64074	1.0895	0.0687751	0.0397022	1.08635	0.92051	1.26676	0.103146	0.353748	1.43664	0.69607	0.860068	0.666774	0.112233
SF2	5	39	39	1	21	H1	S27 FP1	1.889	1.886	1.898	1.684	1.846	2.28e-06	1.44e-06	1.42e-06	7.2e-08	2.76e-08	1.81e-06	NaN	1.2557	0.796368	0.785003	0.039716	0.0152392	1.18581	0.843303	1.17086	0.0708928	0.329303	1.05894	0.944343	0.670449	0.560226	0.0462772
SF2	5	39	39	3	14	C8	S27 FP2	1.892	1.887	1.903	1.708	1.887	9.72e-07	4.09e-07	3.36e-07	1.42e-08	2.21e-08	6.3e-07	NaN	1.54176	0.648609	0.533628	0.0225073	0.0350956	1.15614	0.864949	1.2476	0.0563462	0.18217	1.33354	0.749882	0.427723	0.399447	0.192653
SF2	5	39	39	2	10	C3	S26 FP1	1.892	1.883	1.898	1.673	1.838	9.79e-07	9.02e-07	9.07e-07	6.16e-08	1.9e-08	9.4e-07	NaN	1.04212	0.959582	0.965762	0.065524	0.0202028	1.16497	0.858394	1.29943	0.114311	0.403842	0.89455	1.11788	0.743222	0.573209	0.0500264
ULL	5	39	39	2	6	H2	SA2 FP1	1.86516	1.87824	1.88261	1.60706	1.80947	3.04e-06	6.84e-07	2.54e-06	1.1e-06	3.29e-08	1.44e-06	NaN	2.10847	0.474277	1.76304	0.762392	0.0227857	1.03694	0.964375	1.30048	0.404548	0.307802	2.03336	0.491798	1.35569	1.88455	0.0740272
ULL	5	39	39	2	11	H3	SA2 FP1	1.86516	1.87824	1.88261	1.60706	1.80947	1.09e-06	2.8e-07	1.19e-06	5.22e-07	1.24e-08	5.53e-07	NaN	1.97386	0.506622	2.15956	0.944076	0.0223707	1.03694	0.964375	1.30048	0.404548	0.307802	1.90354	0.525337	1.66059	2.33366	0.0726789
ULL	5	39	39	2	16	G1	SA3 FP1	1.89205	1.89355	1.89836	1.75803	1.86576	2.32e-06	5.31e-07	2.24e-06	5.57e-08	6.75e-08	1.11e-06	NaN	2.08937	0.478614	2.01295	0.0501493	0.060754	1.22252	0.817984	1.33144	0.0366091	0.300785	1.70907	0.585115	1.51186	1.36986	0.201985
ULL	5	39	39	3	18	G5	SA4 FP2	1.90303	1.88082	1.89989	1.68512	1.86345	2.01e-06	5.91e-07	9.52e-07	6.5e-08	4.24e-08	1.09e-06	NaN	1.84458	0.542128	0.873302	0.0595858	0.0388924	1.1967	0.835629	1.14411	0.126625	0.312368	1.54139	0.648767	0.763302	0.470568	0.124508
ULL	5	39	39	3	23	G6	SA4 FP2	1.90303	1.88082	1.89989	1.68512	1.86345	1.73e-06	5.43e-07	1.71e-06	8.31e-08	5.78e-08	9.68e-07	NaN	1.78205	0.56115	1.76825	0.0857785	0.0597273	1.1967	0.835629	1.14411	0.126625	0.312368	1.48914	0.671531	1.54552	0.677421	0.191208
ULL	5	39	39	3	8	B10	SA4 FP3	1.891	1.881	1.9	1.739	1.87	8.77e-07	2.05e-07	7.83e-07	1.65e-08	3.74e-08	4.24e-07	NaN	2.0688	0.483373	1.8479	0.0389819	0.0882104	1.08237	0.923895	1.18757	0.0436103	0.241931	1.91135	0.52319	1.55604	0.893871	0.36461
ULLN	5	39	39	1	6	B10	SA1 FP3	1.89706	1.86936	1.88908	1.66336	1.82491	5.15e-07	1.94e-07	3.45e-07	3.32e-08	4.64e-09	3.16e-07	NaN	1.63074	0.613219	1.09199	0.104981	0.0146744	0.918119	1.08918	1.27429	0.167865	0.299425	1.77617	0.563008	0.856939	0.625392	0.0490086
ULLN	5	39	39	1	10	F11	SA1 FP3	1.89706	1.86936	1.88908	1.66336	1.82491	1.98e-06	5.65e-07	1.35e-06	1.45e-07	3.78e-08	1.06e-06	NaN	1.86887	0.535082	1.27525	0.136852	0.0357632	0.918119	1.08918	1.27429	0.167865	0.299425	2.03555	0.491269	1.00076	0.815248	0.11944
ULLN	5	39	39	2	15	B3	SA2 FP1	1.86516	1.87824	1.88261	1.60706	1.80947	1.83e-06	8.82e-07	1.6e-06	5.04e-07	4.43e-08	1.27e-06	NaN	1.44226	0.693357	1.25933	0.395845	0.0348314	1.03694	0.964375	1.30048	0.404548	0.307802	1.39088	0.718971	0.96836	0.978486	0.113162
ULLN	5	39	39	3	6	G5	SA3 FP2	1.891	1.88	1.906	1.679	1.862	2.5e-06	5.04e-07	1.88e-06	1.1e-07	7.54e-08	1.12e-06	NaN	2.22756	0.448921	1.67129	0.0977796	0.0671652	1.10542	0.904638	1.08647	0.12873	0.274573	2.01514	0.496244	1.53828	0.759568	0.244617
ULLN	5	39	39	2	23	G9	SA3 FP3	1.916	1.884	1.9	1.693	1.853	1.33e-06	5.02e-07	1.37e-06	1.19e-07	3.96e-08	8.17e-07	NaN	1.62768	0.61437	1.68049	0.14525	0.0484678	0.947537	1.05537	1.40604	0.122656	0.34761	1.7178	0.582139	1.19519	1.18421	0.139431
ULLN	5	39	39	3	22	F10	SA4 FP3	1.891	1.881	1.9	1.739	1.87	2.39e-06	5.1e-07	1.29e-06	3.11e-08	3e-08	1.1e-06	NaN	2.16334	0.462248	1.16949	0.0282095	0.0272088	1.08237	0.923895	1.18757	0.0436103	0.241931	1.9987	0.500325	0.984776	0.646856	0.112465
VAR	5	39	39	1	4	D3	SA1 FP1	1.89793	1.9112	1.91557	1.63448	1.88312	4.81e-06	1.1e-06	6.95e-06	4.58e-06	1.61e-08	2.3e-06	NaN	2.09335	0.477702	3.02563	1.99131	0.00701198	1.16648	0.857281	1.18104	0.551543	0.278582	1.79459	0.55723	2.56183	3.61043	0.0251703
VAR	5	39	39	1	23	C12	SA2 FP3	1.875	1.904	1.888	1.646	1.83	2.1e-06	5.08e-07	3.66e-06	3.76e-07	3.59e-09	1.03e-06	NaN	2.03363	0.491732	3.54544	0.363987	0.00347919	1.1766	0.849908	1.21772	0.195822	0.264952	1.7284	0.578571	2.91154	1.85876	0.0131314
VAR	5	39	39	3	3	E6	SA3 FP2	1.891	1.88	1.906	1.679	1.862	2.56e-06	7.21e-07	3.34e-06	2.07e-07	4.38e-08	1.36e-06	NaN	1.8856	0.530335	2.45619	0.152536	0.0322165	1.10542	0.904638	1.08647	0.12873	0.274573	1.70579	0.58624	2.26071	1.18492	0.117333
VAR	5	39	39	2	25	C11	SA3 FP3	1.916	1.884	1.9	1.693	1.853	2.22e-06	1.07e-06	7e-06	5.11e-07	7.55e-08	1.54e-06	NaN	1.44273	0.69313	4.55406	0.332514	0.0491096	0.947537	1.05537	1.40604	0.122656	0.34761	1.52261	0.656767	3.23893	2.71096	0.141278
VAR	5	39	39	3	28	H7	SA4 FP2	1.90303	1.88082	1.89989	1.68512	1.86345	2.16e-06	5.04e-07	2.25e-06	1.96e-07	2.28e-08	1.04e-06	NaN	2.07158	0.482723	2.15848	0.187746	0.021868	1.1967	0.835629	1.14411	0.126625	0.312368	1.73107	0.577676	1.8866	1.48269	0.0700072
VAR	5	39	39	3	24	E9	SA4 FP3	1.891	1.881	1.9	1.739	1.87	2.16e-06	5.48e-07	3.11e-06	8.95e-08	3.32e-08	1.09e-06	NaN	1.9869	0.503296	2.85517	0.0822167	0.0305284	1.08237	0.923895	1.18757	0.0436103	0.241931	1.83569	0.544754	2.40421	1.88526	0.126186
VARN	5	39	39	1	9	C6	SA1 FP2	1.88108	1.87202	1.89195	1.68745	1.85625	1.52e-06	1.4e-06	2.5e-06	1.16e-07	7.9e-09	1.46e-06	NaN	1.04248	0.959247	1.70827	0.0792527	0.00540315	0.995604	1.00442	1.26557	0.102839	0.205655	1.04709	0.95503	1.34981	0.77065	0.026273
VARN	5	39	39	2	14	B4	SA2 FP1	1.86516	1.87824	1.88261	1.60706	1.80947	3.85e-06	1.3e-06	5.06e-06	1.71e-06	6.52e-08	2.23e-06	NaN	1.72265	0.580501	2.26509	0.764851	0.029193	1.03694	0.964375	1.30048	0.404548	0.307802	1.66128	0.601946	1.74174	1.89063	0.0948433
VARN	5	39	39	2	2	D1	SA2 FP1	1.86516	1.87824	1.88261	1.60706	1.80947	1.87e-06	1.39e-06	4.47e-06	1.28e-06	6.31e-08	1.62e-06	NaN	1.16032	0.86183	2.768	0.792991	0.03903	1.03694	0.964375	1.30048	0.404548	0.307802	1.11898	0.893668	2.12845	1.96019	0.126802
VARN	5	39	39	2	7	E1	SA2 FP1	1.86516	1.87824	1.88261	1.60706	1.80947	4.06e-06	2.81e-06	6.92e-06	1.36e-06	4.09e-08	3.38e-06	NaN	1.20234	0.83171	2.04744	0.403973	0.0121083	1.03694	0.964375	1.30048	0.404548	0.307802	1.15951	0.862434	1.57438	0.998578	0.0393379
VARN	5	39	39	2	19	F5	SA3 FP2	1.891	1.88	1.906	1.679	1.862	2.78e-06	7.38e-07	2.64e-06	1.7e-07	8.8e-08	1.43e-06	NaN	1.9401	0.515438	1.84266	0.118791	0.0614034	1.10542	0.904638	1.08647	0.12873	0.274573	1.75508	0.569773	1.69601	0.922787	0.223632
VARN	5	39	39	3	21	B7	SA4 FP2	1.90303	1.88082	1.89989	1.68512	1.86345	2.01e-06	1.11e-06	2.64e-06	8.83e-08	3.18e-08	1.49e-06	NaN	1.34707	0.742354	1.7684	0.0590397	0.0212491	1.1967	0.835629	1.14411	0.126625	0.312368	1.12565	0.888378	1.54566	0.466256	0.0680258
VIN3-1	5	39	39	2	5	D2	S26 FP1	1.892	1.883	1.898	1.673	1.838	1.98e-06	1.36e-06	1.91e-06	1.84e-06	2.78e-10	1.64e-06	NaN	1.20569	0.829402	1.1603	1.12003	0.000169321	1.16497	0.858394	1.29943	0.114311	0.403842	1.03496	0.966225	0.892931	9.79809	0.000419276
VIN3-1	5	39	39	3	17	S26 F9	S26,7,8 FP3	1.88	1.892	1.904	1.701	1.845	1.23e-06	2.73e-07	4.66e-07	2.17e-08	1.96e-10	5.79e-07	NaN	2.12345	0.470932	0.805252	0.0375683	0.000338126	1.08635	0.92051	1.26676	0.103146	0.353748	1.95466	0.511599	0.635677	0.364224	0.000955838
VIN3-1	5	39	39	1	24	B3	S27 FP1	1.889	1.886	1.898	1.684	1.846	1.04e-06	9.45e-07	1.28e-06	5.2e-08	7.01e-10	9.93e-07	NaN	1.05013	0.952265	1.29442	0.0523717	0.000706007	1.18581	0.843303	1.17086	0.0708928	0.329303	0.885576	1.12921	1.10553	0.738745	0.00214394
VIN3-1	5	39	39	1	28	D8	S27 FP2	1.892	1.887	1.903	1.708	1.887	6.54e-07	2.71e-07	2.2e-07	1.51e-08	8.76e-11	4.21e-07	NaN	1.55323	0.64382	0.523004	0.035772	0.000208048	1.15614	0.864949	1.2476	0.0563462	0.18217	1.34346	0.744344	0.419207	0.634861	0.00114205
VIN3-1	5	39	39	2	21	E5	S27 FP2	1.892	1.887	1.903	1.708	1.887	8.05e-07	4e-07	9.2e-07	3.23e-08	1.49e-09	5.67e-07	NaN	1.41968	0.704383	1.62211	0.0569385	0.00263568	1.15614	0.864949	1.2476	0.0563462	0.18217	1.22795	0.814364	1.30018	1.01051	0.0144682
VIN3-1	5	39	39	3	5	H6	S27 FP2	1.892	1.887	1.903	1.708	1.887	1.34e-06	2.13e-07	5.28e-07	2.27e-08	1.11e-10	5.35e-07	NaN	2.50576	0.39908	0.987034	0.0423593	0.000206865	1.15614	0.864949	1.2476	0.0563462	0.18217	2.16736	0.461391	0.791146	0.751769	0.00113556
SF2	6	46	46	1	10	C7	S26 FP2	1.886	1.89	1.902	1.701	1.854	5.51e-07	1.58e-07	1.65e-07	9.84e-09	2.15e-08	2.95e-07	NaN	1.86531	0.536104	0.557408	0.0333247	0.0728411	1.18581	0.843303	1.17086	0.0708928	0.329303	1.57302	0.635719	0.476067	0.470072	0.221198
SF2	6	46	46	2	4	E8	S26 FP2	1.886	1.89	1.902	1.701	1.854	1.37e-06	2.99e-07	5.57e-07	3.41e-08	2.52e-08	6.41e-07	NaN	2.14516	0.466165	0.870077	0.0532276	0.0393518	1.18581	0.843303	1.17086	0.0708928	0.329303	1.80902	0.552784	0.743108	0.750817	0.1195
SF2	6	46	46	3	16	S27 D9	S26,7,8 FP3	1.88	1.892	1.904	1.701	1.845	1.53e-06	4.08e-07	3.37e-07	3.37e-08	6.73e-08	7.9e-07	NaN	1.93761	0.5161	0.426169	0.0425827	0.0852051	1.08635	0.92051	1.26676	0.103146	0.353748	1.78359	0.560667	0.336424	0.412839	0.240864
SF2	6	46	46	2	3	F3	S27 FP1	1.889	1.886	1.898	1.684	1.846	1.38e-06	8.99e-07	8.2e-07	5.75e-08	5.39e-08	1.11e-06	NaN	1.23812	0.807676	0.737459	0.0517001	0.0484598	1.18581	0.843303	1.17086	0.0708928	0.329303	1.04411	0.957752	0.629843	0.729271	0.147159
SF2	6	46	46	3	26	G8	S27 FP2	1.892	1.887	1.903	1.708	1.887	1.17e-06	2.95e-07	6.07e-07	4.25e-08	3.51e-08	5.88e-07	NaN	1.99556	0.501112	1.03319	0.0722318	0.0596321	1.15614	0.864949	1.2476	0.0563462	0.18217	1.72606	0.579354	0.828143	1.28193	0.327343
VIN3-1	6	46	46	1	21	D4	S26 FP1	1.892	1.883	1.898	1.673	1.838	1.49e-07	5.98e-08	4.09e-08	8.79e-10	1.21e-10	9.43e-08	NaN	1.57616	0.634454	0.43399	0.00931726	0.00128445	1.16497	0.858394	1.29943	0.114311	0.403842	1.35296	0.739118	0.333986	0.0815081	0.00318058
VIN3-1	6	46	46	3	24	F7	S26 FP2	1.886	1.89	1.902	1.701	1.854	8.31e-08	8.87e-08	1.13e-07	3.44e-09	6.39e-11	8.58e-08	NaN	0.967403	1.03369	1.31046	0.0400458	0.000744118	1.18581	0.843303	1.17086	0.0708928	0.329303	0.815814	1.22577	1.11923	0.564878	0.00225968
VIN3-1	6	46	46	2	20	D2	S27 FP1	1.889	1.886	1.898	1.684	1.846	1.95e-06	9.64e-07	1.11e-06	7.25e-08	3.28e-10	1.37e-06	NaN	1.42067	0.703892	0.81265	0.0529565	0.000239401	1.18581	0.843303	1.17086	0.0708928	0.329303	1.19806	0.834685	0.694061	0.746993	0.000726993
VIN3-1	6	46	46	2	22	E8	S27 FP2	1.892	1.887	1.903	1.708	1.887	1.03e-06	2.63e-07	4.22e-07	3.1e-08	3.71e-11	5.2e-07	NaN	1.97636	0.505982	0.811469	0.0595274	7.14e-05	1.15614	0.864949	1.2476	0.0563462	0.18217	1.70945	0.584984	0.650423	1.05646	0.000391956
BRO	7	54	54	1	11	F1	SA1 FP1	1.89793	1.9112	1.91557	1.63448	1.88312	1.81e-06	4.64e-07	8.82e-07	6.8e-07	2.23e-07	9.17e-07	NaN	1.97735	0.505728	0.961647	0.742027	0.24306	1.16648	0.857281	1.18104	0.551543	0.278582	1.69514	0.589921	0.814237	1.34536	0.872492
BRO	7	54	54	1	22	B7	SA1 FP2	1.88108	1.87202	1.89195	1.68745	1.85625	3.77e-06	1.85e-06	3.04e-06	1.14e-07	1.05e-07	2.64e-06	NaN	1.42711	0.700714	1.15079	0.0432863	0.0398999	0.995604	1.00442	1.26557	0.102839	0.205655	1.43342	0.697634	0.909309	0.420915	0.194014
BRO	7	54	54	3	7	B12	SA3 FP3	1.916	1.884	1.9	1.693	1.853	2.47e-06	6.4e-07	1.74e-06	1.72e-07	3.55e-07	1.26e-06	NaN	1.96418	0.509119	1.38118	0.136954	0.282492	0.947537	1.05537	1.40604	0.122656	0.34761	2.07293	0.482409	0.982316	1.11657	0.81267
BRO	7	54	54	3	8	C12	SA3 FP3	1.916	1.884	1.9	1.693	1.853	2.66e-06	7.7e-07	2.82e-06	1.16e-07	2.93e-07	1.43e-06	NaN	1.85987	0.537672	1.9668	0.0807305	0.204846	0.947537	1.05537	1.40604	0.122656	0.34761	1.96285	0.509464	1.39882	0.658188	0.589297
BRO	7	54	54	3	25	C5	SA4 FP2	1.90303	1.88082	1.89989	1.68512	1.86345	1.91e-06	8.47e-07	2.34e-06	2.29e-07	2.44e-07	1.27e-06	NaN	1.50345	0.665136	1.83676	0.17975	0.191646	1.1967	0.835629	1.14411	0.126625	0.312368	1.25633	0.795971	1.6054	1.41954	0.613527
BRO	7	54	54	3	12	G8	SA4 FP2	1.90303	1.88082	1.89989	1.68512	1.86345	2.14e-06	5.21e-07	1.18e-06	1.03e-07	1.33e-07	1.06e-06	NaN	2.02508	0.493808	1.11676	0.0976963	0.12607	1.1967	0.835629	1.14411	0.126625	0.312368	1.69221	0.590942	0.97609	0.771539	0.403594
EDI	7	54	54	1	19	F8	SA1 FP2	1.88108	1.87202	1.89195	1.68745	1.85625	2.56e-06	1.66e-06	1.09e-06	2.72e-08	6.68e-08	2.06e-06	NaN	1.24343	0.804229	0.527409	0.0131946	0.0324432	0.995604	1.00442	1.26557	0.102839	0.205655	1.24892	0.800694	0.416738	0.128304	0.157756
EDI	7	54	54	1	23	G7	SA1 FP2	1.88108	1.87202	1.89195	1.68745	1.85625	1.68e-06	6.55e-07	5.51e-07	3.04e-08	7.07e-08	1.05e-06	NaN	1.59968	0.625126	0.526205	0.0290507	0.0675073	0.995604	1.00442	1.26557	0.102839	0.205655	1.60674	0.622379	0.415786	0.282488	0.328256
EDI	7	54	54	3	3	D9	SA3 FP3	1.916	1.884	1.9	1.693	1.853	2.02e-06	1.08e-06	1.51e-06	8.14e-08	2.32e-07	1.48e-06	NaN	1.37206	0.728831	1.02217	0.055144	0.156953	0.947537	1.05537	1.40604	0.122656	0.34761	1.44803	0.690594	0.726988	0.449584	0.451519
EDI	7	54	54	2	23	H11	SA3 FP3	1.916	1.884	1.9	1.693	1.853	2.88e-06	6.39e-07	8.56e-07	4.62e-08	2.32e-07	1.36e-06	NaN	2.1243	0.470742	0.630091	0.0340485	0.170812	0.947537	1.05537	1.40604	0.122656	0.34761	2.24192	0.446046	0.448132	0.277594	0.491391
EDI	7	54	54	3	24	G2	SA4 FP1	1.895	1.884	1.9	1.717	1.856	2.34e-06	4.48e-07	9.54e-07	3.69e-08	1.16e-07	1.02e-06	NaN	2.28489	0.437659	0.932679	0.0360971	0.113482	1.14057	0.876753	1.23905	0.0691018	0.32793	2.00328	0.499182	0.752737	0.522375	0.346055
EDI	7	54	54	3	23	G10	SA4 FP3	1.891	1.881	1.9	1.739	1.87	3.24e-06	6e-07	7.96e-07	2.39e-08	1.13e-07	1.39e-06	NaN	2.32299	0.43048	0.571388	0.0171781	0.0807942	1.08237	0.923895	1.18757	0.0436103	0.241931	2.1462	0.46594	0.481141	0.393899	0.333955
EDIN	7	54	54	1	16	H8	SA1 FP2	1.88108	1.87202	1.89195	1.68745	1.85625	1.82e-06	1.41e-06	6.32e-07	3.59e-08	6.94e-08	1.6e-06	NaN	1.13598	0.8803	0.394849	0.0224338	0.0433464	0.995604	1.00442	1.26557	0.102839	0.205655	1.14099	0.87643	0.311994	0.218146	0.210773
EDIN	7	54	54	2	16	D3	SA2 FP1	1.86516	1.87824	1.88261	1.60706	1.80947	2.75e-06	1.13e-06	4.41e-07	5.04e-08	1.58e-07	1.76e-06	NaN	1.55704	0.642244	0.249769	0.0285565	0.0896551	1.03694	0.964375	1.30048	0.404548	0.307802	1.50157	0.665969	0.19206	0.0705886	0.291275
EDIN	7	54	54	1	28	E3	SA2 FP1	1.86516	1.87824	1.88261	1.60706	1.80947	3.36e-06	1.51e-06	4.03e-07	8.57e-08	3.42e-07	2.25e-06	NaN	1.49255	0.669996	0.179325	0.0381263	0.152311	1.03694	0.964375	1.30048	0.404548	0.307802	1.43937	0.694747	0.137891	0.0942442	0.494835
EDIN	7	54	54	1	26	C9	SA2 FP3	1.875	1.904	1.888	1.646	1.83	3.09e-06	2.28e-06	9.99e-07	6.52e-08	4.42e-07	2.65e-06	NaN	1.16473	0.858571	0.377169	0.0246132	0.166628	1.1766	0.849908	1.21772	0.195822	0.264952	0.98991	1.01019	0.309734	0.125692	0.628901
EDIN	7	54	54	3	21	D4	SA4 FP1	1.895	1.884	1.9	1.717	1.856	1.9e-06	6.49e-07	2.45e-07	1e-08	7.98e-08	1.11e-06	NaN	1.70992	0.584824	0.220253	0.00902609	0.0718593	1.14057	0.876753	1.23905	0.0691018	0.32793	1.49917	0.667034	0.17776	0.13062	0.21913
EDIN	7	54	54	3	17	D11	SA4 FP3	1.891	1.881	1.9	1.739	1.87	3.44e-08	7.28e-09	5.98e-09	3.03e-10	2.16e-09	1.58e-08	Bad UBC	NaN	NaN	NaN	NaN	NaN	NaN	NaN	NaN	NaN	NaN	NaN	NaN	NaN	NaN	NaN
LOV	7	54	54	1	5	F7	SA1 FP2	1.88108	1.87202	1.89195	1.68745	1.85625	1.6e-06	5.64e-07	9.55e-07	5.64e-08	1.98e-07	9.49e-07	NaN	1.68393	0.593847	1.00576	0.059467	0.208303	0.995604	1.00442	1.26557	0.102839	0.205655	1.69137	0.591237	0.794708	0.578255	1.01288
LOV	7	54	54	2	3	B1	SA2 FP1	1.86516	1.87824	1.88261	1.60706	1.80947	1.69e-06	1.07e-06	2.25e-06	7.12e-07	1.94e-07	1.34e-06	NaN	1.26033	0.793441	1.67453	0.530612	0.144414	1.03694	0.964375	1.30048	0.404548	0.307802	1.21543	0.822752	1.28763	1.31162	0.469177
LOV	7	54	54	2	6	G2	SA2 FP1	1.86516	1.87824	1.88261	1.60706	1.80947	2.77e-06	9.9e-07	2.08e-06	5.24e-07	2.39e-07	1.66e-06	NaN	1.6727	0.597835	1.25817	0.316326	0.144134	1.03694	0.964375	1.30048	0.404548	0.307802	1.61311	0.61992	0.967469	0.781924	0.468267
LOV	7	54	54	2	4	B9	SA2 FP3	1.875	1.904	1.888	1.646	1.83	5.15e-06	1.13e-06	3.6e-06	5.32e-07	5.63e-07	2.41e-06	NaN	2.13986	0.467321	1.49386	0.220979	0.233716	1.1766	0.849908	1.21772	0.195822	0.264952	1.81868	0.549849	1.22677	1.12847	0.882109
LOV	7	54	54	2	25	G11	SA3 FP3	1.916	1.884	1.9	1.693	1.853	2e-06	8.45e-07	1.94e-06	1.23e-07	7.6e-07	1.3e-06	NaN	1.53781	0.650273	1.49158	0.0942471	0.584914	0.947537	1.05537	1.40604	0.122656	0.34761	1.62296	0.616158	1.06084	0.768388	1.68267
LOV	7	54	54	3	14	B4	SA4 FP1	1.895	1.884	1.9	1.717	1.856	3.01e-06	1.07e-06	1.46e-06	6.11e-08	3.24e-07	1.79e-06	NaN	1.68101	0.59488	0.815265	0.0340975	0.181118	1.14057	0.876753	1.23905	0.0691018	0.32793	1.47383	0.678504	0.657976	0.49344	0.552306
NIL2	7	54	54	1	12	F12	SA1 FP3	1.89706	1.86936	1.88908	1.66336	1.82491	1.88e-06	9.27e-07	9.55e-07	1.22e-07	2.48e-07	1.32e-06	NaN	1.42585	0.701338	0.722214	0.0920051	0.187324	0.918119	1.08918	1.27429	0.167865	0.299425	1.55301	0.643911	0.566759	0.548089	0.625612
NIL2	7	54	54	2	7	E2	SA2 FP1	1.86516	1.87824	1.88261	1.60706	1.80947	4.05e-07	1.63e-07	1.2e-07	4.65e-08	2.65e-08	2.57e-07	NaN	1.57571	0.634634	0.467474	0.180793	0.103213	1.03694	0.964375	1.30048	0.404548	0.307802	1.51958	0.658078	0.359464	0.446902	0.335323
NIL2	7	54	54	1	24	F2	SA2 FP1	1.86516	1.87824	1.88261	1.60706	1.80947	4.08e-06	1.39e-06	1.11e-06	2.03e-07	2.09e-07	2.39e-06	NaN	1.71133	0.584341	0.46412	0.0852401	0.087656	1.03694	0.964375	1.30048	0.404548	0.307802	1.65036	0.605928	0.356884	0.210705	0.28478
NIL2	7	54	54	2	15	E10	SA2 FP3	1.875	1.904	1.888	1.646	1.83	1.54e-06	8.84e-07	7.69e-07	4.49e-08	2.27e-07	1.17e-06	NaN	1.32116	0.756909	0.65809	0.0384669	0.194024	1.1766	0.849908	1.21772	0.195822	0.264952	1.12287	0.890578	0.540429	0.196438	0.7323
NIL2	7	54	54	2	22	C7	SA3 FP2	1.891	1.88	1.906	1.679	1.862	2.15e-06	7.08e-07	8.19e-07	7.94e-08	1.57e-07	1.23e-06	NaN	1.74281	0.573785	0.664211	0.064318	0.126999	1.10542	0.904638	1.08647	0.12873	0.274573	1.57661	0.63427	0.611349	0.499633	0.462531
NIL2	7	54	54	3	22	C9	SA4 FP3	1.891	1.881	1.9	1.739	1.87	1.48e-06	5.06e-07	6.52e-07	1.53e-08	7.1e-08	8.66e-07	NaN	1.70908	0.585109	0.753423	0.0177245	0.0820735	1.08237	0.923895	1.18757	0.0436103	0.241931	1.57902	0.633306	0.634425	0.40643	0.339243
SF2	7	54	54	1	21	F4	S26 FP1	1.892	1.883	1.898	1.673	1.838	2.57e-06	7.17e-07	2.73e-07	1.01e-08	7.15e-08	1.36e-06	NaN	1.89345	0.528135	0.201048	0.00743439	0.0526243	1.16497	0.858394	1.29943	0.114311	0.403842	1.62533	0.61526	0.15472	0.0650366	0.130309
SF2	7	54	54	1	17	D6	S26 FP2	1.886	1.89	1.902	1.701	1.854	1.2e-06	1.02e-06	5.29e-07	8.76e-09	4.15e-08	1.1e-06	NaN	1.08393	0.922565	0.479063	0.00793098	0.0375379	1.18581	0.843303	1.17086	0.0708928	0.329303	0.914086	1.09399	0.409154	0.111873	0.113992
SF2	7	54	54	3	2	G1	S27 FP1	1.889	1.886	1.898	1.684	1.846	1.56e-06	8.28e-07	8.08e-07	6.03e-08	1.27e-07	1.14e-06	NaN	1.37321	0.728222	0.710346	0.0529684	0.111718	1.18581	0.843303	1.17086	0.0708928	0.329303	1.15803	0.863535	0.606686	0.747161	0.339255
SF2	7	54	54	3	1	G5	S27 FP2	1.892	1.887	1.903	1.708	1.887	1.92e-06	4.89e-07	2.55e-07	6.1e-09	4.93e-08	9.68e-07	NaN	1.98034	0.504965	0.263	0.00630574	0.0509741	1.15614	0.864949	1.2476	0.0563462	0.18217	1.71289	0.583809	0.210804	0.111911	0.279816
ULL	7	54	54	1	4	C7	SA1 FP2	1.88108	1.87202	1.89195	1.68745	1.85625	1.03e-06	4.12e-07	4.3e-07	2.43e-08	6.61e-08	6.5e-07	NaN	1.57907	0.633283	0.660881	0.0373694	0.101713	0.995604	1.00442	1.26557	0.102839	0.205655	1.58604	0.6305	0.522202	0.363378	0.494583
ULL	7	54	54	2	10	F4	SA2 FP1	1.86516	1.87824	1.88261	1.60706	1.80947	4.41e-06	1.95e-06	1.5e-06	3.41e-07	2.85e-07	2.94e-06	NaN	1.50187	0.665838	0.512417	0.116145	0.0971763	1.03694	0.964375	1.30048	0.404548	0.307802	1.44836	0.690435	0.394022	0.287098	0.31571
ULL	7	54	54	2	5	G4	SA2 FP1	1.86516	1.87824	1.88261	1.60706	1.80947	3.2e-06	1.26e-06	1.59e-06	2.97e-07	2.57e-07	2.01e-06	NaN	1.59237	0.627994	0.792505	0.147913	0.127717	1.03694	0.964375	1.30048	0.404548	0.307802	1.53564	0.651193	0.609396	0.365625	0.414932
ULL	7	54	54	2	13	B7	SA2 FP2	1.884	1.879	1.897	1.705	1.852	3.9e-06	1.41e-06	1.39e-06	4.93e-08	3.21e-07	2.34e-06	NaN	1.66489	0.60064	0.593871	0.021066	0.13722	1.08417	0.922366	1.16193	0.0810971	0.244553	1.53564	0.651195	0.511109	0.259763	0.561104
ULL	7	54	54	2	18	D8	SA3 FP2	1.891	1.88	1.906	1.679	1.862	2.36e-06	8.33e-07	1.8e-06	1.07e-07	5.95e-07	1.4e-06	NaN	1.68416	0.593768	1.28553	0.0764435	0.4245	1.10542	0.904638	1.08647	0.12873	0.274573	1.52355	0.65636	1.18321	0.593826	1.54604
ULL	7	54	54	3	5	H6	SA3 FP2	1.891	1.88	1.906	1.679	1.862	2.84e-06	4.97e-07	1.12e-06	1.53e-07	1.2e-07	1.19e-06	NaN	2.39182	0.418091	0.945798	0.128424	0.100793	1.10542	0.904638	1.08647	0.12873	0.274573	2.16373	0.462164	0.870525	0.997621	0.367091
ULLN	7	54	54	1	8	B4	SA1 FP1	1.89793	1.9112	1.91557	1.63448	1.88312	4.24e-06	3.1e-06	1.21e-06	2.47e-07	1.73e-07	3.63e-06	NaN	1.16912	0.855347	0.333611	0.068091	0.0476747	1.16648	0.857281	1.18104	0.551543	0.278582	1.00226	0.997744	0.282472	0.123455	0.171134
ULLN	7	54	54	1	18	H7	SA1 FP2	1.88108	1.87202	1.89195	1.68745	1.85625	2.31e-06	9.75e-07	4.48e-07	3.98e-08	8.96e-08	1.5e-06	NaN	1.53893	0.6498	0.298872	0.0265283	0.0597562	0.995604	1.00442	1.26557	0.102839	0.205655	1.54573	0.646944	0.236157	0.25796	0.290566
ULLN	7	54	54	1	6	B9	SA1 FP3	1.89706	1.86936	1.88908	1.66336	1.82491	2.43e-06	2.53e-06	1.67e-06	7.96e-08	2.35e-07	2.48e-06	NaN	0.979973	1.02044	0.673783	0.0321424	0.0949443	0.918119	1.08918	1.27429	0.167865	0.299425	1.06737	0.936881	0.528752	0.191478	0.317089
ULLN	7	54	54	1	2	E9	SA1 FP3	1.89706	1.86936	1.88908	1.66336	1.82491	3e-06	3.62e-06	1.78e-06	7.15e-08	2.77e-07	3.29e-06	NaN	0.910047	1.09884	0.541393	0.0216921	0.0839658	0.918119	1.08918	1.27429	0.167865	0.299425	0.991208	1.00887	0.424859	0.129223	0.280423
ULLN	7	54	54	3	11	F8	SA3 FP2	1.891	1.88	1.906	1.679	1.862	2.34e-06	4.08e-07	6.67e-07	4.97e-08	1.09e-07	9.77e-07	NaN	2.39397	0.417716	0.682578	0.0509219	0.111374	1.10542	0.904638	1.08647	0.12873	0.274573	2.16567	0.46175	0.628253	0.39557	0.405624
ULLN	7	54	54	3	26	E7	SA4 FP2	1.90303	1.88082	1.89989	1.68512	1.86345	3.1e-06	6.6e-07	8.69e-07	5.52e-08	1.21e-07	1.43e-06	NaN	2.16588	0.461706	0.607969	0.0385919	0.084586	1.1967	0.835629	1.14411	0.126625	0.312368	1.80987	0.552525	0.53139	0.304772	0.27079
VAR	7	54	54	3	4	E2	SA3 FP1	1.89205	1.89355	1.89836	1.75803	1.86576	3.58e-06	7.18e-07	2.57e-06	3.03e-08	8.44e-08	1.6e-06	NaN	2.23476	0.447476	1.59994	0.0188643	0.0526326	1.22252	0.817984	1.33144	0.0366091	0.300785	1.828	0.547047	1.20166	0.515289	0.174984
VAR	7	54	54	3	9	C8	SA3 FP2	1.891	1.88	1.906	1.679	1.862	2.61e-06	1.15e-06	4.24e-06	2.81e-07	2.43e-07	1.73e-06	NaN	1.51011	0.662204	2.45	0.16272	0.140491	1.10542	0.904638	1.08647	0.12873	0.274573	1.3661	0.73201	2.25501	1.26404	0.511672
VAR	7	54	54	2	27	D6	SA3 FP2	1.891	1.88	1.906	1.679	1.862	2.39e-06	6.76e-07	1.74e-06	1.51e-07	1.24e-07	1.27e-06	NaN	1.87849	0.532342	1.36759	0.118932	0.0976444	1.10542	0.904638	1.08647	0.12873	0.274573	1.69935	0.588459	1.25875	0.923888	0.355622
VAR	7	54	54	3	6	G10	SA3 FP3	1.916	1.884	1.9	1.693	1.853	1.78e-06	6.83e-07	3.29e-06	2.36e-07	1.31e-07	1.1e-06	NaN	1.61185	0.620407	2.98974	0.214241	0.11908	0.947537	1.05537	1.40604	0.122656	0.34761	1.70109	0.587858	2.12635	1.74669	0.342567
VAR	7	54	54	3	18	F1	SA4 FP1	1.895	1.884	1.9	1.717	1.856	3.78e-06	6.53e-07	2.23e-06	1.01e-07	1.29e-07	1.57e-06	NaN	2.40414	0.415949	1.42146	0.0644692	0.0822462	1.14057	0.876753	1.23905	0.0691018	0.32793	2.10784	0.47442	1.14721	0.932961	0.250804
VAR	7	54	54	3	16	G4	SA4 FP1	1.895	1.884	1.9	1.717	1.856	2.46e-06	1.07e-06	3.27e-06	1.75e-07	1.67e-07	1.62e-06	NaN	1.51859	0.658506	2.01841	0.108069	0.103178	1.14057	0.876753	1.23905	0.0691018	0.32793	1.33143	0.751074	1.629	1.56392	0.314633
VARN	7	54	54	1	15	F3	SA1 FP1	1.89793	1.9112	1.91557	1.63448	1.88312	5.3e-06	2.04e-06	2.6e-06	1.6e-06	3.51e-07	3.28e-06	NaN	1.61327	0.61986	0.791062	0.48722	0.106827	1.16648	0.857281	1.18104	0.551543	0.278582	1.38302	0.723054	0.669801	0.883376	0.383468
VARN	7	54	54	1	20	B6	SA1 FP2	1.88108	1.87202	1.89195	1.68745	1.85625	1.14e-06	4.14e-07	3.32e-07	1.35e-08	3.67e-08	6.87e-07	NaN	1.65998	0.602417	0.484162	0.0197119	0.0533923	0.995604	1.00442	1.26557	0.102839	0.205655	1.66731	0.599769	0.382566	0.191678	0.259621
VARN	7	54	54	2	2	C1	SA2 FP1	1.86516	1.87824	1.88261	1.60706	1.80947	3.36e-06	2.9e-06	2.96e-06	7.78e-07	2.94e-07	3.12e-06	NaN	1.07658	0.928864	0.947969	0.249231	0.0942527	1.03694	0.964375	1.30048	0.404548	0.307802	1.03823	0.963178	0.72894	0.616073	0.306212
VARN	7	54	54	2	14	H10	SA2 FP3	1.875	1.904	1.888	1.646	1.83	4.12e-06	1.52e-06	3.06e-06	2.04e-07	3.73e-07	2.5e-06	NaN	1.6474	0.607018	1.22249	0.0817163	0.148919	1.1766	0.849908	1.21772	0.195822	0.264952	1.40014	0.714216	1.00392	0.417299	0.56206
VARN	7	54	54	2	28	E8	SA3 FP2	1.891	1.88	1.906	1.679	1.862	3.14e-06	7.32e-07	1.74e-06	8.14e-08	3.49e-07	1.52e-06	NaN	2.07079	0.482908	1.15066	0.0537174	0.230503	1.10542	0.904638	1.08647	0.12873	0.274573	1.87331	0.533814	1.05909	0.417286	0.839493
VARN	7	54	54	3	28	G9	SA4 FP3	1.891	1.881	1.9	1.739	1.87	2.63e-06	9.01e-07	1.47e-06	4.05e-08	1.79e-07	1.54e-06	NaN	1.70835	0.58536	0.953098	0.0263413	0.116228	1.08237	0.923895	1.18757	0.0436103	0.241931	1.57834	0.633578	0.802563	0.604017	0.480417
VIN3-1	7	54	54	2	24	C1	S26 FP1	1.892	1.883	1.898	1.673	1.838	3.97e-07	4.28e-07	2.3e-07	1.87e-08	7.54e-10	4.12e-07	NaN	0.963369	1.03802	0.557554	0.0453154	0.00182921	1.16497	0.858394	1.29943	0.114311	0.403842	0.82695	1.20926	0.429077	0.396422	0.00452952
VIN3-1	7	54	54	2	19	S26 C9	S26,7,8 FP3	1.88	1.892	1.904	1.701	1.845	1.57e-06	4.73e-07	3.46e-07	2.19e-08	2.77e-10	8.62e-07	NaN	1.8236	0.548365	0.401023	0.0254159	0.000321542	1.08635	0.92051	1.26676	0.103146	0.353748	1.67864	0.595719	0.316573	0.246407	0.000908956
VIN3-1	7	54	54	1	25	C4	S27 FP1	1.889	1.886	1.898	1.684	1.846	1.4e-06	1.48e-06	1.04e-06	5.23e-08	1.64e-09	1.44e-06	NaN	0.974528	1.02614	0.723947	0.0363478	0.00114085	1.18581	0.843303	1.17086	0.0708928	0.329303	0.821822	1.21681	0.618302	0.512714	0.00346445
VIN3-1	7	54	54	3	10	F6	S27 FP2	1.892	1.887	1.903	1.708	1.887	9.94e-07	3.35e-07	1.32e-07	4.53e-09	1.43e-10	5.77e-07	NaN	1.72371	0.580145	0.228895	0.00786115	0.000247678	1.15614	0.864949	1.2476	0.0563462	0.18217	1.49092	0.670728	0.183468	0.139515	0.0013596
SF2	8	60	60	2	14	B2	S26 FP1	1.892	1.883	1.898	1.673	1.838	1.67e-06	4.45e-07	4.03e-07	1.36e-07	1.85e-07	8.61e-07	NaN	1.93679	0.516319	0.46801	0.158274	0.214916	1.16497	0.858394	1.29943	0.114311	0.403842	1.66253	0.601495	0.360166	1.38459	0.532177
SF2	8	60	60	1	26	E1	S26 FP1	1.892	1.883	1.898	1.673	1.838	2.1e-06	7.76e-07	5.3e-08	2.04e-09	1.63e-07	1.28e-06	NaN	1.64588	0.607576	0.0414645	0.00159655	0.127794	1.16497	0.858394	1.29943	0.114311	0.403842	1.41282	0.707806	0.0319099	0.0139668	0.316445
SF2	8	60	60	3	3	S26 D9	S26,7,8 FP3	1.88	1.892	1.904	1.701	1.845	4.34e-07	1.3e-07	1.22e-07	5.39e-09	2.33e-08	2.38e-07	NaN	1.82456	0.548078	0.511972	0.0226725	0.0981885	1.08635	0.92051	1.26676	0.103146	0.353748	1.67952	0.595407	0.404158	0.21981	0.277566
SF2	8	60	60	3	17	S27 B9	S26,7,8 FP3	1.88	1.892	1.904	1.701	1.845	2.8e-06	5.86e-07	2.3e-07	9.69e-09	1.06e-07	1.28e-06	NaN	2.18636	0.457381	0.179372	0.00756642	0.0826936	1.08635	0.92051	1.26676	0.103146	0.353748	2.01257	0.496877	0.141599	0.0733564	0.233764
SF2	8	60	60	2	2	B1	S27 FP1	1.889	1.886	1.898	1.684	1.846	2.24e-06	5.65e-07	1.48e-07	9.08e-09	3.1e-07	1.12e-06	NaN	1.98925	0.502703	0.131957	0.00807774	0.276068	1.18581	0.843303	1.17086	0.0708928	0.329303	1.67754	0.596112	0.112701	0.113943	0.838339
SF2	8	60	60	2	6	H5	S27 FP2	1.892	1.887	1.903	1.708	1.887	1.7e-06	4.54e-07	4e-07	1.66e-08	1.16e-07	8.78e-07	NaN	1.93607	0.516511	0.455038	0.0188517	0.132544	1.15614	0.864949	1.2476	0.0563462	0.18217	1.6746	0.597158	0.364731	0.334569	0.727585
VIN3-1	8	60	60	3	21	E3	S26 FP1	1.892	1.883	1.898	1.673	1.838	1.13e-06	8.16e-07	8e-07	2.23e-08	2.15e-09	9.62e-07	NaN	1.17935	0.847927	0.831792	0.0232083	0.0022311	1.16497	0.858394	1.29943	0.114311	0.403842	1.01234	0.987806	0.640122	0.203028	0.00552469
VIN3-1	8	60	60	3	1	F2	S26 FP1	1.892	1.883	1.898	1.673	1.838	7.63e-07	1.23e-06	1.07e-06	3.08e-08	1.9e-09	9.7e-07	NaN	0.786381	1.27165	1.10049	0.0317574	0.00196152	1.16497	0.858394	1.29943	0.114311	0.403842	0.675024	1.48143	0.846905	0.277816	0.00485716
VIN3-1	8	60	60	3	10	H3	S26 FP1	1.892	1.883	1.898	1.673	1.838	1.51e-06	3.96e-07	7.07e-07	4.52e-08	3.96e-09	7.75e-07	NaN	1.95435	0.51168	0.913103	0.0583264	0.00510598	1.16497	0.858394	1.29943	0.114311	0.403842	1.6776	0.59609	0.702697	0.510244	0.0126435
VIN3-1	8	60	60	3	11	C5	S26 FP2	1.886	1.89	1.902	1.701	1.854	2.21e-06	4.89e-07	4.63e-07	1.68e-08	7.64e-10	1.04e-06	NaN	2.12451	0.470697	0.44622	0.0161471	0.000735571	1.18581	0.843303	1.17086	0.0708928	0.329303	1.79161	0.558158	0.381104	0.227768	0.00223372
VIN3-1	8	60	60	1	7	F8	S26 FP2	1.886	1.89	1.902	1.701	1.854	7.3e-07	1.99e-07	1.8e-07	5.3e-09	1.08e-09	3.81e-07	NaN	1.91664	0.521746	0.473346	0.0139188	0.00282311	1.18581	0.843303	1.17086	0.0708928	0.329303	1.61631	0.618693	0.404271	0.196335	0.00857299
VIN3-1	8	60	60	3	24	G7	S26 FP2	1.886	1.89	1.902	1.701	1.854	1.22e-06	4.26e-07	8.41e-07	2.82e-08	4.68e-10	7.2e-07	NaN	1.69032	0.591603	1.16795	0.0391662	0.000650748	1.18581	0.843303	1.17086	0.0708928	0.329303	1.42546	0.70153	0.997515	0.552471	0.00197614
SF2	9	67	67	2	17	E4	S26 FP1	1.892	1.883	1.898	1.673	1.838	1.28e-06	4.46e-07	2.64e-07	1.77e-08	3.04e-07	7.57e-07	NaN	1.69807	0.588904	0.348862	0.0234186	0.401282	1.16497	0.858394	1.29943	0.114311	0.403842	1.45761	0.686053	0.268473	0.204867	0.993661
SF2	9	67	67	3	19	E7	S26 FP2	1.886	1.89	1.902	1.701	1.854	4.05e-07	2.01e-07	7.91e-08	4.31e-09	5.67e-08	2.85e-07	NaN	1.42198	0.703243	0.277548	0.0151091	0.198778	1.18581	0.843303	1.17086	0.0708928	0.329303	1.19916	0.833914	0.237045	0.213126	0.603632
SF2	9	67	67	2	1	S27 G9	S26,7,8 FP3	1.88	1.892	1.904	1.701	1.845	1.22e-06	3.75e-07	1.37e-07	9.86e-09	2.38e-07	6.78e-07	NaN	1.80612	0.553674	0.202673	0.0145434	0.350778	1.08635	0.92051	1.26676	0.103146	0.353748	1.66255	0.601486	0.159993	0.140999	0.991603
SF2	9	67	67	2	26	E7	S27 FP2	1.892	1.887	1.903	1.708	1.887	1.29e-06	4.63e-07	2.48e-07	5.26e-09	2.14e-07	7.73e-07	NaN	1.66951	0.598977	0.320621	0.00680731	0.277181	1.15614	0.864949	1.2476	0.0563462	0.18217	1.44404	0.6925	0.25699	0.120812	1.52155
VIN3-1	9	67	67	3	26	F6	S26 FP2	1.886	1.89	1.902	1.701	1.854	9.69e-07	2.89e-07	4.45e-07	1.57e-08	2.42e-09	5.29e-07	NaN	1.83037	0.546338	0.840324	0.0296025	0.00457566	1.18581	0.843303	1.17086	0.0708928	0.329303	1.54356	0.647855	0.717697	0.417567	0.013895
VIN3-1	9	67	67	3	17	B4	S27 FP1	1.889	1.886	1.898	1.684	1.846	7.29e-07	3.11e-07	1.56e-07	9.43e-09	1.22e-09	4.76e-07	NaN	1.53172	0.652862	0.327357	0.0198067	0.00255714	1.18581	0.843303	1.17086	0.0708928	0.329303	1.2917	0.774172	0.279586	0.279389	0.00776532
VIN3-1	9	67	67	1	19	D3	S27 FP1	1.889	1.886	1.898	1.684	1.846	1.64e-06	4.57e-07	5.95e-07	2.33e-08	3.42e-09	8.66e-07	NaN	1.89509	0.52768	0.686774	0.0268789	0.00394638	1.18581	0.843303	1.17086	0.0708928	0.329303	1.59813	0.62573	0.586555	0.379149	0.011984
VIN3-1	9	67	67	3	15	D5	S27 FP2	1.892	1.887	1.903	1.708	1.887	1.85e-07	1.13e-07	1.03e-07	5.09e-09	5.24e-09	1.45e-07	NaN	1.27832	0.782275	0.711375	0.0350818	0.0361644	1.15614	0.864949	1.2476	0.0563462	0.18217	1.10568	0.904417	0.570194	0.622611	0.19852
VIN3-1	9	67	67	1	12	D6	S27 FP2	1.892	1.887	1.903	1.708	1.887	1.42e-06	2.52e-07	2.52e-07	1.56e-08	1.91e-09	5.98e-07	NaN	2.37131	0.421708	0.421531	0.0260603	0.00319038	1.15614	0.864949	1.2476	0.0563462	0.18217	2.05106	0.487552	0.337874	0.462503	0.0175132
BRO	10	76	76	2	8	C7	SA2 FP2	1.884	1.879	1.897	1.705	1.852	3.24e-06	1.12e-06	9.45e-07	8.86e-08	1.2e-06	1.9e-06	NaN	1.69848	0.58876	0.496324	0.0465379	0.631623	1.08417	0.922366	1.16193	0.0810971	0.244553	1.56662	0.638315	0.427156	0.573854	2.58276
BRO	10	76	76	1	22	F8	SA2 FP2	1.884	1.879	1.897	1.705	1.852	3.15e-06	1.36e-06	1.02e-06	4.39e-08	1e-06	2.07e-06	NaN	1.51887	0.658385	0.490048	0.021193	0.483974	1.08417	0.922366	1.16193	0.0810971	0.244553	1.40095	0.7138	0.421755	0.261328	1.97902
BRO	10	76	76	2	16	H12	SA3 FP3	1.916	1.884	1.9	1.693	1.853	1.57e-06	3.98e-07	8.07e-07	7.68e-08	1e-06	7.89e-07	NaN	1.98436	0.50394	1.0228	0.0973232	1.26829	0.947537	1.05537	1.40604	0.122656	0.34761	2.09423	0.477502	0.727437	0.793467	3.6486
BRO	10	76	76	3	24	G1	SA4 FP1	1.895	1.884	1.9	1.717	1.856	2.62e-06	4.46e-07	9.42e-07	3.65e-08	8.53e-07	1.08e-06	NaN	2.4225	0.412797	0.872615	0.0338135	0.790237	1.14057	0.876753	1.23905	0.0691018	0.32793	2.12393	0.470825	0.704262	0.489329	2.40977
BRO	10	76	76	3	12	F8	SA4 FP2	1.90303	1.88082	1.89989	1.68512	1.86345	3.8e-06	1.43e-06	1.15e-06	1.05e-07	1.21e-06	2.33e-06	NaN	1.62873	0.613976	0.494611	0.0452191	0.520996	1.1967	0.835629	1.14411	0.126625	0.312368	1.36101	0.734748	0.43231	0.35711	1.66789
BRO	10	76	76	3	14	H10	SA4 FP3	1.891	1.881	1.9	1.739	1.87	3.73e-06	1.22e-06	1.18e-06	2.7e-08	1.15e-06	2.14e-06	NaN	1.74538	0.57294	0.553757	0.0126198	0.537345	1.08237	0.923895	1.18757	0.0436103	0.241931	1.61255	0.620135	0.466295	0.289377	2.22107
EDI	10	76	76	1	9	G5	SA1 FP2	1.88108	1.87202	1.89195	1.68745	1.85625	8.63e-07	6.46e-07	2.61e-07	2.03e-08	2.21e-07	7.47e-07	NaN	1.15589	0.865132	0.349942	0.0272039	0.295873	0.995604	1.00442	1.26557	0.102839	0.205655	1.161	0.861329	0.27651	0.26453	1.43869
EDI	10	76	76	1	4	G9	SA1 FP3	1.89706	1.86936	1.88908	1.66336	1.82491	1.45e-06	1.17e-06	7.72e-07	9e-08	6.89e-07	1.3e-06	NaN	1.11432	0.897405	0.592856	0.0690934	0.529369	0.918119	1.08918	1.27429	0.167865	0.299425	1.2137	0.823925	0.465245	0.411601	1.76795
EDI	10	76	76	2	15	E9	SA2 FP3	1.875	1.904	1.888	1.646	1.83	2.25e-06	6.98e-07	7.74e-07	1.37e-07	8.76e-07	1.25e-06	NaN	1.79531	0.557008	0.617619	0.10928	0.698839	1.1766	0.849908	1.21772	0.195822	0.264952	1.52585	0.655374	0.507194	0.558058	2.63761
EDI	10	76	76	1	19	G10	SA2 FP3	1.875	1.904	1.888	1.646	1.83	2.24e-06	1.15e-06	1.19e-06	1.98e-07	8.83e-07	1.6e-06	NaN	1.39711	0.715765	0.74015	0.12354	0.550458	1.1766	0.849908	1.21772	0.195822	0.264952	1.18741	0.842168	0.607817	0.63088	2.07758
EDI	10	76	76	3	9	E1	SA3 FP1	1.89205	1.89355	1.89836	1.75803	1.86576	1.4e-06	2.8e-07	4.63e-07	1.51e-08	3.12e-07	6.25e-07	NaN	2.23582	0.447263	0.74002	0.0241295	0.498919	1.22252	0.817984	1.33144	0.0366091	0.300785	1.82886	0.546788	0.555804	0.659113	1.65872
EDI	10	76	76	3	21	C4	SA4 FP1	1.895	1.884	1.9	1.717	1.856	2.5e-06	5.93e-07	5.37e-07	2.79e-08	5.94e-07	1.22e-06	NaN	2.0547	0.486688	0.440539	0.0228781	0.487992	1.14057	0.876753	1.23905	0.0691018	0.32793	1.80147	0.555103	0.355546	0.331079	1.4881
EDIN	10	76	76	2	3	E6	SA2 FP2	1.884	1.879	1.897	1.705	1.852	2.61e-06	1.23e-06	9.96e-08	7.69e-09	7.66e-07	1.79e-06	NaN	1.45627	0.686687	0.0555401	0.00428774	0.427349	1.08417	0.922366	1.16193	0.0810971	0.244553	1.34321	0.744484	0.0478	0.0528716	1.74747
EDIN	10	76	76	1	20	C10	SA2 FP3	1.875	1.904	1.888	1.646	1.83	2.3e-06	1.04e-06	5.87e-07	5.5e-08	1.17e-06	1.55e-06	NaN	1.48894	0.671617	0.379487	0.0355694	0.758266	1.1766	0.849908	1.21772	0.195822	0.264952	1.26547	0.790223	0.311637	0.181642	2.8619
EDIN	10	76	76	3	2	C1	SA3 FP1	1.89205	1.89355	1.89836	1.75803	1.86576	3.25e-06	7.37e-07	2.58e-07	6.16e-09	6.48e-07	1.55e-06	NaN	2.10015	0.476156	0.167079	0.00398176	0.41915	1.22252	0.817984	1.33144	0.0366091	0.300785	1.71789	0.58211	0.125488	0.108764	1.39352
EDIN	10	76	76	3	1	C10	SA3 FP3	1.916	1.884	1.9	1.693	1.853	1.61e-06	3.38e-07	5.46e-08	2e-08	8.03e-07	7.37e-07	NaN	2.17885	0.458958	0.0740284	0.0271455	1.08952	0.947537	1.05537	1.40604	0.122656	0.34761	2.29948	0.43488	0.0526503	0.221315	3.13431
EDIN	10	76	76	3	25	D8	SA4 FP2	1.90303	1.88082	1.89989	1.68512	1.86345	1.36e-06	5.15e-07	6.11e-08	9.75e-09	4.65e-07	8.36e-07	NaN	1.62318	0.616074	0.0730284	0.0116611	0.556318	1.1967	0.835629	1.14411	0.126625	0.312368	1.35638	0.737258	0.0638298	0.0920913	1.78097
EDIN	10	76	76	3	17	F6	SA4 FP2	1.90303	1.88082	1.89989	1.68512	1.86345	1.21e-06	6.36e-07	8.7e-08	7.02e-09	2.77e-07	8.77e-07	NaN	1.3804	0.724426	0.099123	0.00800501	0.315413	1.1967	0.835629	1.14411	0.126625	0.312368	1.15351	0.866923	0.0866376	0.0632181	1.00975
LOV	10	76	76	1	18	B3	SA1 FP1	1.89793	1.9112	1.91557	1.63448	1.88312	2.29e-06	4.48e-07	6.81e-07	6.38e-07	1.32e-06	1.01e-06	NaN	2.26238	0.442012	0.672008	0.629122	1.30706	1.16648	0.857281	1.18104	0.551543	0.278582	1.9395	0.515597	0.568996	1.14066	4.69185
LOV	10	76	76	1	12	D8	SA1 FP2	1.88108	1.87202	1.89195	1.68745	1.85625	2.17e-06	1.41e-06	1.07e-06	9.96e-08	7.13e-07	1.75e-06	NaN	1.23819	0.807633	0.609688	0.0569618	0.407721	0.995604	1.00442	1.26557	0.102839	0.205655	1.24365	0.804082	0.481751	0.553894	1.98255
LOV	10	76	76	1	24	B8	SA2 FP2	1.884	1.879	1.897	1.705	1.852	1.69e-06	9.7e-07	1.05e-06	4.85e-08	8.48e-07	1.28e-06	NaN	1.31819	0.758616	0.823692	0.0378914	0.662691	1.08417	0.922366	1.16193	0.0810971	0.244553	1.21585	0.822467	0.708901	0.467235	2.7098
LOV	10	76	76	1	26	D8	SA2 FP2	1.884	1.879	1.897	1.705	1.852	2.4e-06	7.09e-07	8.33e-07	5.04e-08	7.64e-07	1.3e-06	NaN	1.8394	0.543656	0.638391	0.0386612	0.585732	1.08417	0.922366	1.16193	0.0810971	0.244553	1.6966	0.589414	0.549424	0.476727	2.39511
LOV	10	76	76	1	25	G9	SA2 FP3	1.875	1.904	1.888	1.646	1.83	2.1e-06	6.95e-07	9.25e-07	1.74e-07	1.01e-06	1.21e-06	NaN	1.73718	0.575645	0.765677	0.144285	0.836087	1.1766	0.849908	1.21772	0.195822	0.264952	1.47644	0.677303	0.62878	0.736817	3.15562
LOV	10	76	76	3	16	C12	SA4 FP3	1.891	1.881	1.9	1.739	1.87	1e-06	5.1e-07	7.7e-07	3.06e-08	5.74e-07	7.15e-07	NaN	1.40262	0.712954	1.07652	0.0428	0.802455	1.08237	0.923895	1.18757	0.0436103	0.241931	1.29587	0.771682	0.906493	0.981421	3.31687
NIL2	10	76	76	1	8	G3	SA1 FP1	1.89793	1.9112	1.91557	1.63448	1.88312	3.16e-06	1.57e-06	4.7e-07	4.25e-07	1.44e-06	2.23e-06	NaN	1.41853	0.704954	0.210589	0.190395	0.647632	1.16648	0.857281	1.18104	0.551543	0.278582	1.21608	0.822314	0.178308	0.345205	2.32474
NIL2	10	76	76	2	2	B10	SA2 FP3	1.875	1.904	1.888	1.646	1.83	1.7e-06	1.43e-06	8.88e-07	6.86e-08	1.15e-06	1.56e-06	NaN	1.09274	0.91513	0.569525	0.0439886	0.737895	1.1766	0.849908	1.21772	0.195822	0.264952	0.928729	1.07674	0.467698	0.224636	2.78502
NIL2	10	76	76	1	23	F11	SA2 FP3	1.875	1.904	1.888	1.646	1.83	4.26e-06	1.37e-06	8.17e-07	7.76e-08	1.62e-06	2.41e-06	NaN	1.76554	0.566397	0.338543	0.0321172	0.669007	1.1766	0.849908	1.21772	0.195822	0.264952	1.50055	0.666422	0.278014	0.164012	2.52502
NIL2	10	76	76	3	11	E7	SA3 FP2	1.891	1.88	1.906	1.679	1.862	2.44e-06	5.78e-07	6.89e-07	5.58e-08	7.56e-07	1.19e-06	NaN	2.05452	0.486731	0.580359	0.0470121	0.63629	1.10542	0.904638	1.08647	0.12873	0.274573	1.8586	0.53804	0.53417	0.365198	2.31738
NIL2	10	76	76	2	27	D10	SA3 FP3	1.916	1.884	1.9	1.693	1.853	1.27e-06	6.69e-07	4.41e-07	4.78e-08	8.08e-07	9.2e-07	NaN	1.37603	0.726726	0.479327	0.0519732	0.87869	0.947537	1.05537	1.40604	0.122656	0.34761	1.45222	0.6886	0.340906	0.423733	2.5278
NIL2	10	76	76	3	26	H11	SA4 FP3	1.891	1.881	1.9	1.739	1.87	2.31e-06	1.05e-06	2.02e-07	3.88e-09	6.39e-07	1.56e-06	NaN	1.48229	0.674631	0.129978	0.0024903	0.410631	1.08237	0.923895	1.18757	0.0436103	0.241931	1.36948	0.730203	0.109449	0.0571035	1.6973
SF2	10	76	76	2	23	H2	S26 FP1	1.892	1.883	1.898	1.673	1.838	1.84e-06	4.71e-07	3.4e-07	1.56e-07	8.87e-07	9.3e-07	NaN	1.97674	0.505884	0.364982	0.167797	0.953402	1.16497	0.858394	1.29943	0.114311	0.403842	1.69682	0.589338	0.280879	1.4679	2.36083
SF2	10	76	76	3	13	H6	S26 FP2	1.886	1.89	1.902	1.701	1.854	1.61e-06	3.9e-07	2.82e-07	1.5e-08	4.21e-07	7.92e-07	NaN	2.03023	0.492554	0.356212	0.0189092	0.530967	1.18581	0.843303	1.17086	0.0708928	0.329303	1.7121	0.584077	0.304231	0.266729	1.6124
SF2	10	76	76	3	6	H8	S26 FP2	1.886	1.89	1.902	1.701	1.854	1.42e-08	3.65e-09	3.46e-09	2.43e-10	3.46e-09	7.19e-09	Bad UBC	1.96947	0.507751	0.48153	0.0337813	0.48088	1.18581	0.843303	1.17086	0.0708928	0.329303	1.66086	0.602098	0.411261	0.476512	1.4603
SF2	10	76	76	3	19	S27 E9	S26,7,8 FP3	1.88	1.892	1.904	1.701	1.845	1.28e-06	2.62e-07	1.59e-07	6.62e-09	2.51e-07	5.79e-07	NaN	2.21338	0.451798	0.274392	0.0114234	0.433459	1.08635	0.92051	1.26676	0.103146	0.353748	2.03744	0.490812	0.216609	0.11075	1.22533
SF2	10	76	76	2	11	E2	S27 FP1	1.889	1.886	1.898	1.684	1.846	1.07e-06	5.05e-07	3.41e-07	3.15e-08	4.83e-07	7.34e-07	NaN	1.45243	0.6885	0.464359	0.0429426	0.657507	1.18581	0.843303	1.17086	0.0708928	0.329303	1.22484	0.816433	0.396596	0.60574	1.99666
SF2	10	76	76	1	21	F4	S27 FP1	1.889	1.886	1.898	1.684	1.846	4.49e-07	2.19e-07	1.16e-07	1.1e-08	2.29e-07	3.13e-07	NaN	1.43215	0.698249	0.369239	0.0351625	0.732362	1.18581	0.843303	1.17086	0.0708928	0.329303	1.20774	0.827992	0.315356	0.495995	2.22398
ULL	10	76	76	2	21	D2	SA3 FP1	1.89205	1.89355	1.89836	1.75803	1.86576	1.9e-06	3.25e-07	5.25e-07	7.47e-09	4.5e-07	7.85e-07	NaN	2.41742	0.413665	0.668848	0.00951346	0.573174	1.22252	0.817984	1.33144	0.0366091	0.300785	1.97741	0.505713	0.502349	0.259866	1.90559
ULL	10	76	76	2	19	D5	SA3 FP2	1.891	1.88	1.906	1.679	1.862	2.03e-06	6.44e-07	4.68e-07	4.44e-08	5.24e-07	1.14e-06	NaN	1.77648	0.562911	0.40885	0.0387802	0.457498	1.10542	0.904638	1.08647	0.12873	0.274573	1.60707	0.622251	0.376311	0.301251	1.66622
ULL	10	76	76	2	26	F7	SA3 FP2	1.891	1.88	1.906	1.679	1.862	1.89e-06	3.28e-07	8.17e-07	8.41e-08	4.83e-07	7.88e-07	NaN	2.40065	0.416554	1.03661	0.106646	0.612288	1.10542	0.904638	1.08647	0.12873	0.274573	2.17172	0.460465	0.954111	0.828445	2.22996
ULL	10	76	76	2	24	G6	SA3 FP2	1.891	1.88	1.906	1.679	1.862	1.34e-06	4.5e-07	7.67e-07	7.8e-08	3.99e-07	7.76e-07	NaN	1.72637	0.579252	0.988783	0.100477	0.514577	1.10542	0.904638	1.08647	0.12873	0.274573	1.56174	0.640313	0.910088	0.780526	1.8741
ULL	10	76	76	3	18	D5	SA4 FP2	1.90303	1.88082	1.89989	1.68512	1.86345	1.05e-06	6.22e-07	5.67e-07	2.55e-08	2.58e-07	8.08e-07	NaN	1.29837	0.770196	0.701362	0.0316078	0.320013	1.1967	0.835629	1.14411	0.126625	0.312368	1.08496	0.921696	0.613019	0.249617	1.02448
ULLN	10	76	76	1	6	E3	SA1 FP1	1.89793	1.9112	1.91557	1.63448	1.88312	3.29e-06	2.24e-06	1.3e-06	7.12e-07	1.39e-06	2.71e-06	NaN	1.21248	0.824755	0.478163	0.262512	0.512503	1.16648	0.857281	1.18104	0.551543	0.278582	1.03944	0.96206	0.404866	0.475959	1.83969
ULLN	10	76	76	1	10	H6	SA1 FP2	1.88108	1.87202	1.89195	1.68745	1.85625	1.05e-06	2.21e-07	1.04e-07	9.49e-09	2.29e-07	4.82e-07	NaN	2.17682	0.459387	0.216643	0.0196952	0.475349	0.995604	1.00442	1.26557	0.102839	0.205655	2.18643	0.457367	0.171183	0.191515	2.31139
ULLN	10	76	76	1	5	B11	SA1 FP3	1.89706	1.86936	1.88908	1.66336	1.82491	4.93e-13	0	2.35e-10	0	2.52e-12	0	NaN	NaN	NaN	NaN	NaN	NaN	NaN	NaN	NaN	NaN	NaN	NaN	NaN	NaN	NaN	NaN
ULLN	10	76	76	1	13	H9	SA1 FP3	1.89706	1.86936	1.88908	1.66336	1.82491	1.22e-06	1.54e-06	7.89e-07	5.05e-08	7.06e-07	1.37e-06	NaN	0.890767	1.12263	0.576764	0.036916	0.516234	0.918119	1.08918	1.27429	0.167865	0.299425	0.970209	1.03071	0.452616	0.219915	1.72408
ULLN	10	76	76	2	7	H8	SA2 FP2	1.884	1.879	1.897	1.705	1.852	3.34e-06	1.24e-06	7.31e-07	3.82e-08	9.15e-07	2.04e-06	NaN	1.64021	0.609676	0.358772	0.0187488	0.449266	1.08417	0.922366	1.16193	0.0810971	0.244553	1.51288	0.660992	0.308773	0.231189	1.83709
ULLN	10	76	76	3	4	H3	SA3 FP1	1.89205	1.89355	1.89836	1.75803	1.86576	5.01e-06	9.58e-07	3.23e-06	6.98e-08	1.25e-06	2.19e-06	NaN	2.28666	0.437318	1.4736	0.031867	0.569232	1.22252	0.817984	1.33144	0.0366091	0.300785	1.87045	0.53463	1.10677	0.870467	1.89249
VAR	10	76	76	1	16	E1	SA1 FP1	1.89793	1.9112	1.91557	1.63448	1.88312	1.91e-06	2.49e-06	2.53e-06	1.46e-06	6.41e-07	2.18e-06	NaN	0.876782	1.14053	1.16042	0.669315	0.293776	1.16648	0.857281	1.18104	0.551543	0.278582	0.751648	1.33041	0.982542	1.21353	1.05454
VAR	10	76	76	1	17	C5	SA1 FP2	1.88108	1.87202	1.89195	1.68745	1.85625	1.73e-06	3.01e-06	3.14e-06	1.66e-07	4.35e-07	2.28e-06	NaN	0.757639	1.31989	1.37415	0.0726412	0.190519	0.995604	1.00442	1.26557	0.102839	0.205655	0.760984	1.31409	1.0858	0.70636	0.926402
VAR	10	76	76	1	11	E8	SA1 FP2	1.88108	1.87202	1.89195	1.68745	1.85625	3.42e-06	3.42e-06	4.17e-06	2.43e-07	1.02e-06	3.42e-06	NaN	1.00013	0.999874	1.22062	0.0711551	0.299319	0.995604	1.00442	1.26557	0.102839	0.205655	1.00454	0.995479	0.964488	0.691909	1.45545
VAR	10	76	76	1	28	E7	SA2 FP2	1.884	1.879	1.897	1.705	1.852	2.63e-06	4.85e-07	8.77e-07	5.08e-08	8.8e-07	1.13e-06	NaN	2.32743	0.429659	0.775864	0.0450008	0.77842	1.08417	0.922366	1.16193	0.0810971	0.244553	2.14674	0.465823	0.667739	0.5549	3.18303
VAR	10	76	76	3	8	G8	SA3 FP2	1.891	1.88	1.906	1.679	1.862	1.34e-06	6.01e-07	1.73e-06	1.28e-07	2.84e-07	8.96e-07	NaN	1.4907	0.670824	1.93135	0.143378	0.317286	1.10542	0.904638	1.08647	0.12873	0.274573	1.34855	0.741539	1.77764	1.11379	1.15556
VAR	10	76	76	2	25	G12	SA3 FP3	1.916	1.884	1.9	1.693	1.853	1.56e-06	6.98e-07	1.15e-06	1e-07	4.72e-07	1.04e-06	NaN	1.4953	0.668764	1.10514	0.0960378	0.452072	0.947537	1.05537	1.40604	0.122656	0.34761	1.57809	0.633678	0.785995	0.782988	1.30051
VARN	10	76	76	1	14	D1	SA1 FP1	1.89793	1.9112	1.91557	1.63448	1.88312	3.19e-06	2.19e-06	2.05e-06	7.26e-07	1.46e-06	2.64e-06	NaN	1.20653	0.828824	0.774952	0.274732	0.551276	1.16648	0.857281	1.18104	0.551543	0.278582	1.03433	0.966805	0.65616	0.498115	1.97886
VARN	10	76	76	1	2	B5	SA1 FP2	1.88108	1.87202	1.89195	1.68745	1.85625	1.09e-06	1.3e-06	8.2e-07	5.35e-08	4.91e-07	1.19e-06	NaN	0.916841	1.0907	0.690049	0.0450054	0.413374	0.995604	1.00442	1.26557	0.102839	0.205655	0.920888	1.08591	0.545249	0.43763	2.01004
VARN	10	76	76	2	12	B2	SA2 FP1	1.86516	1.87824	1.88261	1.60706	1.80947	3.16e-06	1.8e-06	1.83e-06	2.79e-07	7.98e-07	2.38e-06	NaN	1.32448	0.755013	0.768868	0.117177	0.334544	1.03694	0.964375	1.30048	0.404548	0.307802	1.27729	0.782905	0.59122	0.289649	1.08688
VARN	10	76	76	2	22	E4	SA3 FP1	1.89205	1.89355	1.89836	1.75803	1.86576	3.05e-06	8.24e-07	9.83e-07	1.07e-08	8.43e-07	1.58e-06	NaN	1.92287	0.520056	0.620481	0.00674441	0.531937	1.22252	0.817984	1.33144	0.0366091	0.300785	1.57287	0.635778	0.466022	0.184228	1.7685
VARN	10	76	76	3	27	H3	SA4 FP1	1.895	1.884	1.9	1.717	1.856	1.98e-06	1.23e-06	1.06e-06	1.95e-08	5.84e-07	1.56e-06	NaN	1.2677	0.788832	0.674404	0.0124781	0.373567	1.14057	0.876753	1.23905	0.0691018	0.32793	1.11146	0.89972	0.544291	0.180575	1.13917
VARN	10	76	76	3	20	B12	SA4 FP3	1.891	1.881	1.9	1.739	1.87	1.4e-06	1.14e-06	9.73e-07	1.06e-08	3.81e-07	1.27e-06	NaN	1.10844	0.902168	0.768859	0.0083967	0.300745	1.08237	0.923895	1.18757	0.0436103	0.241931	1.02408	0.976483	0.647423	0.19254	1.2431
VIN3-1	10	76	76	2	10	B4	S26 FP1	1.892	1.883	1.898	1.673	1.838	1.04e-06	6.56e-07	5.15e-07	3.18e-08	7.66e-09	8.26e-07	NaN	1.25878	0.794422	0.623686	0.0385039	0.00928228	1.16497	0.858394	1.29943	0.114311	0.403842	1.08053	0.925475	0.47997	0.336835	0.0229849
VIN3-1	10	76	76	2	28	G4	S26 FP1	1.892	1.883	1.898	1.673	1.838	2.63e-08	4.23e-08	2.19e-08	6.85e-10	3.48e-10	3.34e-08	NaN	0.788411	1.26837	0.655014	0.0205193	0.0104254	1.16497	0.858394	1.29943	0.114311	0.403842	0.676767	1.47761	0.504079	0.179504	0.0258154
VIN3-1	10	76	76	2	14	S26 G9	S26,7,8 FP3	1.88	1.892	1.904	1.701	1.845	1.02e-06	2.38e-07	1.99e-07	9.98e-09	4.2e-09	4.92e-07	NaN	2.06878	0.483377	0.40467	0.0202615	0.00853837	1.08635	0.92051	1.26676	0.103146	0.353748	1.90433	0.525118	0.319452	0.196435	0.0241368
VIN3-1	10	76	76	2	9	C1	S27 FP1	1.889	1.886	1.898	1.684	1.846	1.3e-06	3.15e-07	2.03e-07	3.09e-08	8.16e-09	6.39e-07	NaN	2.02779	0.493149	0.317726	0.0482761	0.0127612	1.18581	0.843303	1.17086	0.0708928	0.329303	1.71004	0.584782	0.271361	0.680973	0.0387521
VIN3-1	10	76	76	3	15	H4	S27 FP1	1.889	1.886	1.898	1.684	1.846	3.26e-14	4.56e-13	1.38e-14	0	0	1.22e-13	Bad UBC	NaN	NaN	NaN	NaN	NaN	NaN	NaN	NaN	NaN	NaN	NaN	NaN	NaN	NaN	NaN
VIN3-1	10	76	76	2	17	H8	S27 FP2	1.892	1.887	1.903	1.708	1.887	1.13e-06	2.73e-07	4.02e-07	9.98e-09	1.07e-09	5.55e-07	NaN	2.03003	0.492604	0.724289	0.0179999	0.00193608	1.15614	0.864949	1.2476	0.0563462	0.18217	1.75587	0.569518	0.580545	0.319452	0.0106279
NIL1	11	81	81	3	19	G6	S27 FP2	1.892	1.887	1.903	1.708	1.887	0	4.72e-11	1.04e-10	5.45e-11	2.25e-13	0	Bad UBC	NaN	NaN	NaN	NaN	NaN	NaN	NaN	NaN	NaN	NaN	NaN	NaN	NaN	NaN	NaN
SF2	11	81	81	3	12	F3	S26 FP1	1.892	1.883	1.898	1.673	1.838	1e-06	1.31e-06	3.55e-07	9.3e-09	3.65e-07	1.15e-06	NaN	0.875103	1.14272	0.309545	0.00810534	0.318278	1.16497	0.858394	1.29943	0.114311	0.403842	0.751183	1.33123	0.238216	0.0709061	0.788125
SF2	11	81	81	1	27	D7	S26 FP2	1.886	1.89	1.902	1.701	1.854	1.57e-06	8.92e-07	1.15e-07	3.74e-09	3.08e-07	1.18e-06	NaN	1.32809	0.752958	0.0967238	0.00315336	0.259783	1.18581	0.843303	1.17086	0.0708928	0.329303	1.11999	0.892868	0.082609	0.0444806	0.788888
SF2	11	81	81	3	3	G7	S27 FP2	1.892	1.887	1.903	1.708	1.887	1.8e-06	7.01e-07	5.92e-08	2.34e-09	4.76e-07	1.13e-06	NaN	1.60399	0.623447	0.0526213	0.00208185	0.423122	1.15614	0.864949	1.2476	0.0563462	0.18217	1.38737	0.720791	0.042178	0.0369474	2.32267
VIN3-1	11	81	81	1	18	G2	S26 FP1	1.892	1.883	1.898	1.673	1.838	2.63e-06	1.47e-06	9.17e-07	3.52e-08	3.42e-08	1.97e-06	NaN	1.33884	0.746918	0.466415	0.0179104	0.0174111	1.16497	0.858394	1.29943	0.114311	0.403842	1.14925	0.870134	0.358939	0.156681	0.0431135
VIN3-1	11	81	81	2	6	B7	S26 FP2	1.886	1.89	1.902	1.701	1.854	3.72e-07	2.46e-07	5.82e-08	1.93e-09	3.27e-09	3.03e-07	NaN	1.23073	0.812523	0.192547	0.00639314	0.010817	1.18581	0.843303	1.17086	0.0708928	0.329303	1.03788	0.963501	0.164449	0.0901804	0.0328482
VIN3-1	11	81	81	2	3	H7	S26 FP2	1.886	1.89	1.902	1.701	1.854	1.27e-06	1.45e-06	6.81e-07	2.8e-08	2.93e-08	1.36e-06	NaN	0.936328	1.068	0.501191	0.0205647	0.0215572	1.18581	0.843303	1.17086	0.0708928	0.329303	0.789608	1.26645	0.428053	0.290082	0.065463
VIN3-1	11	81	81	2	24	B5	S27 FP2	1.892	1.887	1.903	1.708	1.887	2.75e-07	1.68e-07	1.76e-07	5.84e-09	1.55e-09	2.15e-07	NaN	1.2768	0.783209	0.818193	0.0271495	0.00719449	1.15614	0.864949	1.2476	0.0563462	0.18217	1.10436	0.905498	0.655813	0.481833	0.0394932
VIN3-1	11	81	81	1	3	C7	S27 FP2	1.892	1.887	1.903	1.708	1.887	8.88e-07	4.24e-07	1.68e-07	5.94e-09	4.59e-09	6.14e-07	NaN	1.44717	0.691003	0.273504	0.0096817	0.00748438	1.15614	0.864949	1.2476	0.0563462	0.18217	1.25173	0.798895	0.219224	0.171825	0.0410845
VIN3-1	11	81	81	1	22	F5	S27 FP2	1.892	1.887	1.903	1.708	1.887	9.85e-07	6.01e-07	1.78e-07	8.9e-09	3.09e-09	7.69e-07	NaN	1.28047	0.780961	0.231958	0.0115678	0.00402263	1.15614	0.864949	1.2476	0.0563462	0.18217	1.10754	0.902899	0.185923	0.205299	0.0220817
BRO	12	104	104	1	9	G1	SA1 FP1	1.89793	1.9112	1.91557	1.63448	1.88312	2.31e-06	1.62e-06	4.86e-07	2.3e-07	8.87e-07	1.93e-06	NaN	1.19194	0.838968	0.250977	0.118969	0.458452	1.16648	0.857281	1.18104	0.551543	0.278582	1.02183	0.978638	0.212505	0.215702	1.64566
BRO	12	104	104	2	13	E11	SA2 FP3	1.875	1.904	1.888	1.646	1.83	3.02e-06	1.13e-06	8.66e-07	1.36e-07	1.92e-06	1.84e-06	NaN	1.63634	0.61112	0.470012	0.0740199	1.04073	1.1766	0.849908	1.21772	0.195822	0.264952	1.39074	0.719043	0.385977	0.377995	3.928
BRO	12	104	104	2	9	H9	SA2 FP3	1.875	1.904	1.888	1.646	1.83	2.01e-06	6.55e-07	2.68e-07	2.48e-08	6.28e-07	1.15e-06	NaN	1.75313	0.570408	0.232836	0.0216027	0.546529	1.1766	0.849908	1.21772	0.195822	0.264952	1.49	0.671141	0.191207	0.110318	2.06275
BRO	12	104	104	2	21	G4	SA3 FP1	1.89205	1.89355	1.89836	1.75803	1.86576	2.7e-06	5.13e-07	3.39e-07	1.18e-08	9.55e-07	1.18e-06	NaN	2.29374	0.435969	0.288219	0.0100747	0.81209	1.22252	0.817984	1.33144	0.0366091	0.300785	1.87624	0.53298	0.216472	0.275196	2.6999
BRO	12	104	104	3	4	B7	SA3 FP2	1.891	1.88	1.906	1.679	1.862	1.69e-06	4.48e-07	2.89e-07	3.88e-08	4.81e-07	8.7e-07	NaN	1.94268	0.514752	0.332397	0.0445557	0.552186	1.10542	0.904638	1.08647	0.12873	0.274573	1.75742	0.569015	0.305942	0.346116	2.01107
BRO	12	104	104	3	21	D6	SA4 FP2	1.90303	1.88082	1.89989	1.68512	1.86345	2.2e-06	7.69e-07	3.51e-07	2.85e-08	6.54e-07	1.3e-06	NaN	1.69377	0.590398	0.269413	0.0219233	0.502744	1.1967	0.835629	1.14411	0.126625	0.312368	1.41537	0.706531	0.235478	0.173135	1.60946
EDI	12	104	104	1	20	G10	SA1 FP3	1.89706	1.86936	1.88908	1.66336	1.82491	7.85e-11	0	0	0	8.56e-12	0	Bad UBC	NaN	NaN	NaN	NaN	NaN	NaN	NaN	NaN	NaN	NaN	NaN	NaN	NaN	NaN	NaN
EDI	12	104	104	2	8	C5	SA2 FP2	1.884	1.879	1.897	1.705	1.852	2.52e-06	5.37e-07	1.22e-07	2.79e-09	4.7e-07	1.16e-06	NaN	2.16445	0.462012	0.104459	0.0023995	0.404146	1.08417	0.922366	1.16193	0.0810971	0.244553	1.99641	0.500898	0.0899016	0.029588	1.65259
EDI	12	104	104	2	23	E5	SA3 FP2	1.891	1.88	1.906	1.679	1.862	1.96e-06	4.66e-07	2.15e-07	2.41e-08	5.44e-07	9.56e-07	NaN	2.05284	0.487131	0.224886	0.0252021	0.569106	1.10542	0.904638	1.08647	0.12873	0.274573	1.85707	0.538481	0.206988	0.195774	2.07269
EDI	12	104	104	2	24	H7	SA3 FP2	1.891	1.88	1.906	1.679	1.862	1.89e-06	4.38e-07	1.69e-07	2.15e-08	5.44e-07	9.11e-07	NaN	2.07801	0.481229	0.185512	0.0235757	0.597707	1.10542	0.904638	1.08647	0.12873	0.274573	1.87985	0.531958	0.170748	0.18314	2.17686
EDI	12	104	104	3	22	H1	SA4 FP1	1.895	1.884	1.9	1.717	1.856	1.5e-06	4.18e-07	3.97e-07	1.88e-08	2.8e-07	7.93e-07	NaN	1.89502	0.527699	0.500222	0.0236813	0.35302	1.14057	0.876753	1.23905	0.0691018	0.32793	1.66146	0.601879	0.403714	0.342702	1.07651
EDI	12	104	104	3	27	F7	SA4 FP2	1.90303	1.88082	1.89989	1.68512	1.86345	2.75e-06	6.56e-07	1.78e-07	3.05e-08	6.88e-07	1.34e-06	NaN	2.04632	0.488682	0.132431	0.022718	0.512658	1.1967	0.835629	1.14411	0.126625	0.312368	1.70996	0.584808	0.11575	0.179412	1.6412
EDIN	12	104	104	1	3	H12	SA1 FP3	1.89706	1.86936	1.88908	1.66336	1.82491	1.87e-06	1.14e-06	1.36e-07	1e-08	7.53e-07	1.46e-06	NaN	1.28114	0.780557	0.093175	0.00686076	0.514572	0.918119	1.08918	1.27429	0.167865	0.299425	1.39539	0.716644	0.0731192	0.0408707	1.71853
EDIN	12	104	104	2	14	F6	SA2 FP2	1.884	1.879	1.897	1.705	1.852	2.71e-06	1e-06	3.38e-08	4.02e-09	3.6e-07	1.65e-06	NaN	1.64429	0.608166	0.0204867	0.00243683	0.218393	1.08417	0.922366	1.16193	0.0810971	0.244553	1.51663	0.659355	0.0176317	0.0300483	0.893029
EDIN	12	104	104	2	17	C9	SA3 FP3	1.916	1.884	1.9	1.693	1.853	1.43e-06	8.11e-07	8.46e-08	1.5e-08	6.61e-07	1.08e-06	NaN	1.32601	0.754139	0.0786959	0.0139356	0.614771	0.947537	1.05537	1.40604	0.122656	0.34761	1.39943	0.714575	0.0559699	0.113616	1.76856
EDIN	12	104	104	3	26	F3	SA4 FP1	1.895	1.884	1.9	1.717	1.856	1.76e-06	6.06e-07	4.81e-08	6.21e-09	5.96e-07	1.03e-06	NaN	1.70371	0.586953	0.0466417	0.00601695	0.577493	1.14057	0.876753	1.23905	0.0691018	0.32793	1.49374	0.669462	0.0376431	0.0870737	1.76103
EDIN	12	104	104	3	15	G11	SA4 FP3	1.891	1.881	1.9	1.739	1.87	2.29e-06	4.74e-07	1.28e-07	5.83e-09	6.63e-07	1.04e-06	NaN	2.19749	0.455064	0.12333	0.00559435	0.636465	1.08237	0.923895	1.18757	0.0436103	0.241931	2.03025	0.492549	0.103851	0.12828	2.63077
EDIN	12	104	104	3	25	H9	SA4 FP3	1.891	1.881	1.9	1.739	1.87	1.72e-06	6.25e-07	3.69e-08	2.61e-09	3.5e-07	1.04e-06	NaN	1.65665	0.603627	0.0356621	0.00252505	0.33842	1.08237	0.923895	1.18757	0.0436103	0.241931	1.53057	0.653349	0.0300296	0.0579003	1.39883
LOV	12	104	104	1	1	C10	SA1 FP3	1.89706	1.86936	1.88908	1.66336	1.82491	3.52e-06	1.19e-06	3.4e-07	4.44e-08	1.15e-06	2.05e-06	NaN	1.71801	0.58207	0.165713	0.021656	0.562378	0.918119	1.08918	1.27429	0.167865	0.299425	1.87122	0.534409	0.130044	0.129008	1.87819
LOV	12	104	104	1	25	C4	SA2 FP1	1.86516	1.87824	1.88261	1.60706	1.80947	3.62e-06	1.17e-06	5.13e-07	1.2e-07	1.03e-06	2.06e-06	NaN	1.75917	0.568451	0.249517	0.0585121	0.49944	1.03694	0.964375	1.30048	0.404548	0.307802	1.6965	0.58945	0.191866	0.144636	1.6226
LOV	12	104	104	2	1	G5	SA2 FP2	1.884	1.879	1.897	1.705	1.852	3.03e-06	7.79e-07	2.38e-07	9.4e-09	6.58e-07	1.54e-06	NaN	1.97246	0.50698	0.154713	0.00612027	0.428508	1.08417	0.922366	1.16193	0.0810971	0.244553	1.81933	0.549652	0.133152	0.0754684	1.75221
LOV	12	104	104	3	2	G2	SA3 FP1	1.89205	1.89355	1.89836	1.75803	1.86576	2.47e-06	3.14e-07	1.28e-07	7.6e-09	5.72e-07	8.81e-07	NaN	2.80523	0.356477	0.145507	0.00863054	0.649469	1.22252	0.817984	1.33144	0.0366091	0.300785	2.29463	0.4358	0.109285	0.235749	2.15925
LOV	12	104	104	3	12	F9	SA3 FP3	1.916	1.884	1.9	1.693	1.853	1.24e-06	5.13e-07	2.27e-07	2.71e-08	6.56e-07	7.96e-07	NaN	1.55157	0.644511	0.284755	0.03409	0.823805	0.947537	1.05537	1.40604	0.122656	0.34761	1.63747	0.610698	0.202523	0.277933	2.36991
LOV	12	104	104	3	18	E8	SA4 FP2	1.90303	1.88082	1.89989	1.68512	1.86345	2.98e-06	4.9e-07	3.43e-07	3.66e-08	8.38e-07	1.21e-06	NaN	2.46381	0.405876	0.283931	0.0303212	0.694244	1.1967	0.835629	1.14411	0.126625	0.312368	2.05883	0.485713	0.248167	0.239456	2.22252
NIL2	12	104	104	1	10	G2	SA1 FP1	1.89793	1.9112	1.91557	1.63448	1.88312	3.08e-06	2.42e-06	4.73e-07	1.9e-07	1.02e-06	2.73e-06	NaN	1.12876	0.885928	0.173158	0.0695194	0.372482	1.16648	0.857281	1.18104	0.551543	0.278582	0.967665	1.03342	0.146615	0.126045	1.33707
NIL2	12	104	104	1	17	H2	SA1 FP1	1.89793	1.9112	1.91557	1.63448	1.88312	3.62e-06	1.85e-06	5.38e-07	7.17e-07	1.16e-06	2.59e-06	NaN	1.3975	0.715565	0.207539	0.276795	0.446547	1.16648	0.857281	1.18104	0.551543	0.278582	1.19805	0.834691	0.175726	0.501856	1.60293
NIL2	12	104	104	2	12	G8	SA2 FP2	1.884	1.879	1.897	1.705	1.852	8.67e-07	3.51e-07	8.42e-08	3.6e-09	2.49e-07	5.52e-07	NaN	1.57196	0.636147	0.152647	0.00651832	0.45123	1.08417	0.922366	1.16193	0.0810971	0.244553	1.44993	0.68969	0.131374	0.0803767	1.84512
NIL2	12	104	104	2	15	D1	SA3 FP1	1.89205	1.89355	1.89836	1.75803	1.86576	2e-06	5.9e-07	2.62e-07	5.38e-09	6.53e-07	1.09e-06	NaN	1.84122	0.543118	0.241329	0.00495592	0.601798	1.22252	0.817984	1.33144	0.0366091	0.300785	1.50609	0.663971	0.181254	0.135374	2.00076
NIL2	12	104	104	3	10	G7	SA3 FP2	1.891	1.88	1.906	1.679	1.862	1.39e-06	2.98e-07	1.45e-07	1.83e-08	7.67e-07	6.45e-07	NaN	2.16223	0.462486	0.225065	0.0284346	1.18884	1.10542	0.904638	1.08647	0.12873	0.274573	1.95603	0.511239	0.207153	0.220885	4.32978
NIL2	12	104	104	3	6	D12	SA3 FP3	1.916	1.884	1.9	1.693	1.853	1.7e-06	6.55e-07	1.76e-07	1.77e-08	9.2e-07	1.05e-06	NaN	1.60905	0.621485	0.167451	0.016765	0.873417	0.947537	1.05537	1.40604	0.122656	0.34761	1.69814	0.58888	0.119094	0.136684	2.51263
SF2	12	104	104	1	22	H4	S26 FP1	1.892	1.883	1.898	1.673	1.838	7.38e-07	3.3e-07	2.84e-08	1.71e-09	1.74e-07	4.94e-07	NaN	1.49437	0.669177	0.0574686	0.00345772	0.352475	1.16497	0.858394	1.29943	0.114311	0.403842	1.28276	0.779569	0.0442261	0.0302484	0.872803
SF2	12	104	104	2	10	S26 E9	S26,7,8 FP3	1.88	1.892	1.904	1.701	1.845	5.78e-07	1.59e-07	2.58e-08	2.67e-09	2.24e-07	3.03e-07	NaN	1.90466	0.525028	0.0851757	0.00879159	0.738497	1.08635	0.92051	1.26676	0.103146	0.353748	1.75326	0.570367	0.0672389	0.0852345	2.08763
SF2	12	104	104	2	27	S27 F9	S26,7,8 FP3	1.88	1.892	1.904	1.701	1.845	7.02e-11	0	0	0	7.53e-12	0	Bad UBC	NaN	NaN	NaN	NaN	NaN	NaN	NaN	NaN	NaN	NaN	NaN	NaN	NaN	NaN	NaN
SF2	12	104	104	2	26	H2	S27 FP1	1.889	1.886	1.898	1.684	1.846	2.11e-06	5.64e-07	9.29e-08	4.85e-09	6.66e-07	1.09e-06	NaN	1.93436	0.516967	0.0851552	0.00444689	0.610154	1.18581	0.843303	1.17086	0.0708928	0.329303	1.63125	0.613026	0.0727286	0.0627269	1.85287
SF2	12	104	104	3	9	D3	S26 FP1	1.892	1.883	1.898	1.673	1.838	6.11e-07	6.73e-07	6.55e-08	3.95e-09	2.85e-07	6.41e-07	NaN	0.952837	1.0495	0.102217	0.00616714	0.443853	1.16497	0.858394	1.29943	0.114311	0.403842	0.81791	1.22263	0.0786633	0.0539506	1.09907
ULL	12	104	104	1	27	E4	SA2 FP1	1.86516	1.87824	1.88261	1.60706	1.80947	2.14e-06	1.04e-06	4.83e-07	1.16e-07	4.64e-07	1.49e-06	NaN	1.43479	0.696965	0.323871	0.0774737	0.311299	1.03694	0.964375	1.30048	0.404548	0.307802	1.38368	0.722711	0.24904	0.191507	1.01136
ULL	12	104	104	2	11	C6	SA2 FP2	1.884	1.879	1.897	1.705	1.852	2.41e-06	1.02e-06	4.04e-07	1.67e-08	3.85e-07	1.57e-06	NaN	1.53999	0.649354	0.258087	0.0106669	0.245494	1.08417	0.922366	1.16193	0.0810971	0.244553	1.42044	0.704009	0.22212	0.131532	1.00385
ULL	12	104	104	2	4	F7	SA2 FP2	1.884	1.879	1.897	1.705	1.852	2.08e-06	1.13e-06	3.32e-07	2.15e-08	3.31e-07	1.53e-06	NaN	1.35669	0.737089	0.216458	0.0140627	0.215921	1.08417	0.922366	1.16193	0.0810971	0.244553	1.25136	0.799128	0.186293	0.173406	0.88292
ULL	12	104	104	1	26	D12	SA2 FP3	1.875	1.904	1.888	1.646	1.83	2.56e-06	1.38e-06	6.89e-07	3.63e-08	4.34e-07	1.88e-06	NaN	1.36404	0.733119	0.36642	0.0193033	0.231007	1.1766	0.849908	1.21772	0.195822	0.264952	1.1593	0.862586	0.300907	0.0985758	0.871882
ULL	12	104	104	3	19	C6	SA4 FP2	1.90303	1.88082	1.89989	1.68512	1.86345	1.57e-06	4.97e-07	2.41e-07	2.17e-08	2.3e-07	8.83e-07	NaN	1.77551	0.563219	0.273349	0.0245621	0.260589	1.1967	0.835629	1.14411	0.126625	0.312368	1.48367	0.674006	0.238918	0.193975	0.834238
ULLN	12	104	104	1	7	C4	SA1 FP1	1.89793	1.9112	1.91557	1.63448	1.88312	5.4e-06	1.7e-06	3.61e-07	2.07e-07	1.48e-06	3.03e-06	NaN	1.78072	0.56157	0.119049	0.0683727	0.487981	1.16648	0.857281	1.18104	0.551543	0.278582	1.52658	0.65506	0.1008	0.123966	1.75166
ULLN	12	104	104	1	14	D5	SA1 FP2	1.88108	1.87202	1.89195	1.68745	1.85625	1.46e-06	1.09e-06	1.73e-07	3.75e-09	4.07e-07	1.26e-06	NaN	1.15593	0.865103	0.136703	0.00296992	0.322816	0.995604	1.00442	1.26557	0.102839	0.205655	1.16104	0.8613	0.108017	0.0288794	1.5697
ULLN	12	104	104	1	4	E10	SA1 FP3	1.89706	1.86936	1.88908	1.66336	1.82491	3.18e-06	1.17e-06	2.03e-07	9.04e-09	1.08e-06	1.93e-06	NaN	1.65095	0.605711	0.105424	0.00469255	0.560222	0.918119	1.08918	1.27429	0.167865	0.299425	1.79819	0.556115	0.0827314	0.0279543	1.87099
ULLN	12	104	104	2	2	B12	SA2 FP3	1.875	1.904	1.888	1.646	1.83	2.6e-06	4.84e-07	2.21e-07	1.22e-08	7.73e-07	1.12e-06	NaN	2.31703	0.431587	0.19729	0.0108516	0.689573	1.1766	0.849908	1.21772	0.195822	0.264952	1.96926	0.507804	0.162016	0.0554158	2.60264
ULLN	12	104	104	3	1	H1	SA3 FP1	1.89205	1.89355	1.89836	1.75803	1.86576	3.74e-06	9.01e-07	4.35e-07	1.11e-08	8.54e-07	1.84e-06	NaN	2.03792	0.490696	0.236923	0.00603984	0.465204	1.22252	0.817984	1.33144	0.0366091	0.300785	1.66699	0.599884	0.177945	0.164982	1.54663
ULLN	12	104	104	2	28	F10	SA3 FP3	1.916	1.884	1.9	1.693	1.853	1.23e-06	4.05e-07	1.13e-07	1.68e-08	5.87e-07	7.05e-07	NaN	1.7414	0.574249	0.15983	0.023842	0.832827	0.947537	1.05537	1.40604	0.122656	0.34761	1.83782	0.544123	0.113674	0.194382	2.39586
VAR	12	104	104	1	2	F4	SA1 FP1	1.89793	1.9112	1.91557	1.63448	1.88312	3.01e-06	2.57e-06	1.56e-06	7.87e-07	6.6e-07	2.78e-06	NaN	1.08277	0.923556	0.559566	0.283149	0.237428	1.16648	0.857281	1.18104	0.551543	0.278582	0.928239	1.07731	0.47379	0.513376	0.852275
VAR	12	104	104	1	8	E6	SA1 FP2	1.88108	1.87202	1.89195	1.68745	1.85625	2.33e-06	9.56e-07	6.88e-07	5.23e-08	2.16e-07	1.49e-06	NaN	1.56102	0.640605	0.461564	0.0350893	0.14495	0.995604	1.00442	1.26557	0.102839	0.205655	1.56792	0.637789	0.36471	0.341207	0.704821
VAR	12	104	104	1	5	D11	SA1 FP3	1.89706	1.86936	1.88908	1.66336	1.82491	2.43e-06	9.9e-07	9e-07	4.88e-08	3.33e-07	1.55e-06	NaN	1.56605	0.638551	0.580356	0.0314945	0.214752	0.918119	1.08918	1.27429	0.167865	0.299425	1.70571	0.586266	0.455435	0.187618	0.717215
VAR	12	104	104	2	6	F12	SA2 FP3	1.875	1.904	1.888	1.646	1.83	2.1e-06	1.39e-06	1.09e-06	7.7e-08	1.85e-07	1.71e-06	NaN	1.22929	0.813478	0.640061	0.0450484	0.1085	1.1766	0.849908	1.21772	0.195822	0.264952	1.04478	0.957136	0.525623	0.230048	0.409509
VAR	12	104	104	3	17	B1	SA4 FP1	1.895	1.884	1.9	1.717	1.856	1.92e-06	7.29e-07	8.22e-07	3.95e-08	3.4e-07	1.18e-06	NaN	1.62344	0.615975	0.694409	0.0333312	0.286838	1.14057	0.876753	1.23905	0.0691018	0.32793	1.42336	0.702564	0.560437	0.48235	0.874693
VAR	12	104	104	3	16	D2	SA4 FP1	1.895	1.884	1.9	1.717	1.856	1.7e-06	8.37e-07	8.44e-07	3.38e-08	4.03e-07	1.19e-06	NaN	1.42438	0.70206	0.70819	0.0283811	0.338287	1.14057	0.876753	1.23905	0.0691018	0.32793	1.24883	0.80075	0.571559	0.410715	1.03158
VARN	12	104	104	1	23	C2	SA1 FP1	1.89793	1.9112	1.91557	1.63448	1.88312	5.29e-06	1.41e-06	2.76e-07	2.17e-07	1.91e-06	2.73e-06	NaN	1.93458	0.516908	0.1009	0.0794136	0.700558	1.16648	0.857281	1.18104	0.551543	0.278582	1.65848	0.602963	0.0854332	0.143984	2.51473
VARN	12	104	104	1	24	G11	SA2 FP3	1.875	1.904	1.888	1.646	1.83	2.75e-06	2.67e-06	9.5e-07	6.83e-08	8.57e-07	2.71e-06	NaN	1.01554	0.984696	0.350817	0.0252125	0.316476	1.1766	0.849908	1.21772	0.195822	0.264952	0.863117	1.15859	0.288094	0.128752	1.19447
VARN	12	104	104	2	22	H2	SA3 FP1	1.89205	1.89355	1.89836	1.75803	1.86576	2.64e-06	5.77e-07	2.7e-07	5.04e-09	5.91e-07	1.23e-06	NaN	2.14174	0.466909	0.218947	0.0040802	0.47865	1.22252	0.817984	1.33144	0.0366091	0.300785	1.75191	0.570805	0.164443	0.111453	1.59134
VARN	12	104	104	3	5	E12	SA3 FP3	1.916	1.884	1.9	1.693	1.853	1.75e-06	6.35e-07	2.01e-07	1.36e-08	7.84e-07	1.05e-06	NaN	1.66003	0.602398	0.191109	0.012936	0.743439	0.947537	1.05537	1.40604	0.122656	0.34761	1.75194	0.570795	0.13592	0.105466	2.13871
VARN	12	104	104	3	20	C2	SA4 FP1	1.895	1.884	1.9	1.717	1.856	2.08e-06	1.07e-06	3.15e-07	1.27e-08	7.87e-07	1.49e-06	NaN	1.39246	0.718154	0.211448	0.00853878	0.528057	1.14057	0.876753	1.23905	0.0691018	0.32793	1.22084	0.819106	0.170654	0.123568	1.61027
VARN	12	104	104	3	24	F4	SA4 FP1	1.895	1.884	1.9	1.717	1.856	2.04e-06	5.31e-07	2.25e-07	7.29e-09	8.45e-07	1.04e-06	NaN	1.95847	0.510604	0.216722	0.00700383	0.812519	1.14057	0.876753	1.23905	0.0691018	0.32793	1.71709	0.58238	0.174909	0.101355	2.47772
VIN3-1	12	104	104	1	28	F1	S26 FP1	1.892	1.883	1.898	1.673	1.838	8.28e-07	7.97e-07	5.69e-07	2.48e-08	2.3e-08	8.12e-07	NaN	1.01893	0.98142	0.700392	0.0305668	0.0283551	1.16497	0.858394	1.29943	0.114311	0.403842	0.874645	1.14332	0.539001	0.267401	0.0702133
VIN3-1	12	104	104	1	13	G6	S26 FP2	1.886	1.89	1.902	1.701	1.854	1.7e-06	4.23e-07	3.08e-07	5.92e-09	2.43e-08	8.47e-07	NaN	2.00169	0.499579	0.364127	0.00698677	0.0286779	1.18581	0.843303	1.17086	0.0708928	0.329303	1.68803	0.592408	0.310991	0.098554	0.0870867
VIN3-1	12	104	104	3	7	G3	S27 FP1	1.889	1.886	1.898	1.684	1.846	1.29e-07	1.29e-07	2.06e-07	8.47e-08	4.82e-10	1.29e-07	NaN	1.0003	0.9997	1.59335	0.656247	0.00373303	1.18581	0.843303	1.17086	0.0708928	0.329303	0.843556	1.18546	1.36083	9.25689	0.0113362
VIN3-1	12	104	104	3	8	B8	S27 FP2	1.892	1.887	1.903	1.708	1.887	7.96e-07	4.02e-07	1.83e-07	4.61e-09	3.47e-09	5.66e-07	NaN	1.40707	0.710699	0.323096	0.00815132	0.00612652	1.15614	0.864949	1.2476	0.0563462	0.18217	1.21704	0.821666	0.258974	0.144665	0.0336307
VIN3-1	12	104	104	2	16	C6	S27 FP2	1.892	1.887	1.903	1.708	1.887	4.66e-07	7.75e-08	9.42e-08	1.22e-08	7.7e-09	1.9e-07	NaN	2.45245	0.407756	0.495715	0.064353	0.0405221	1.15614	0.864949	1.2476	0.0563462	0.18217	2.12124	0.471422	0.397334	1.1421	0.222441
VIN3-1	12	104	104	2	25	D7	S27 FP2	1.892	1.887	1.903	1.708	1.887	7.31e-07	2.09e-07	1.36e-07	5.68e-09	7.73e-09	3.91e-07	NaN	1.86993	0.53478	0.348142	0.0145281	0.0197714	1.15614	0.864949	1.2476	0.0563462	0.18217	1.61739	0.618279	0.279049	0.257837	0.108532

## Sheet: South_Sweden_16
Gen	Block	Sampling	Timepoint_Cold	Timepoint	Rep	tissueCode	plateCode	efficiency_PP2A	efficiency_UBC	efficiency_FLC	efficiency_UNF	efficiency_VIN3	PP2A_N0	UBC_N0	FLC_N0	UNF_N0	VIN3_N0	geoMean	Flag	PP2A	UBC	FLC	UNF	VIN3	PP2A_plCtrl	UBC_plCtrl	FLC_plCtrl	UNF_plCtrl	VIN3_plCtrl	PP2A_plateCorrected	UBC_plateCorrected	FLC_plateCorrected	UNF_plateCorrected	VIN3_plateCorrected
SF2	1	1	14	14	22	H5	L13 FP2	1.89875	1.88871	1.90457	1.75288	1.86615	7.27e-06	1.29e-06	1.64e-06	1.06e-07	5.69e-09	3.06e-06	NaN	2.37745	0.420619	0.537444	0.0347274	0.00186096	1.15194	0.868098	1.27151	0.0444998	0.257212	2.06386	0.484529	0.422683	0.780395	0.00723512
SF2	14	1	14	14	20	H8	L13 FP2	1.89875	1.88871	1.90457	1.75288	1.86615	1.8e-06	4.4e-07	1.05e-06	5.83e-08	3.19e-09	8.91e-07	NaN	2.02226	0.494496	1.17839	0.0654354	0.00358375	1.15194	0.868098	1.27151	0.0444998	0.257212	1.75552	0.569631	0.926766	1.47046	0.013933
SF2	27	1	14	14	5	D6	L13 FP2	1.89875	1.88871	1.90457	1.75288	1.86615	2.61e-06	5.8e-07	1.22e-06	2.3e-08	2.78e-09	1.23e-06	NaN	2.12237	0.471171	0.992335	0.0187336	0.00225956	1.15194	0.868098	1.27151	0.0444998	0.257212	1.84243	0.542763	0.780439	0.420981	0.0087848
SF2	14	1	14	14	21	F10	L13 FP3	1.89072	1.88949	1.88744	1.71232	1.82196	2.01e-06	4.32e-07	1.09e-06	8.34e-08	7.82e-09	9.3e-07	NaN	2.15498	0.464042	1.16874	0.0895944	0.00840929	1.27937	0.781632	1.35391	0.0931663	0.461608	1.6844	0.593684	0.863233	0.961661	0.0182174
SF2	1	1	14	14	9	D1	L14 FP1	1.89844	1.8983	1.90667	1.7481	1.86582	2.43e-06	2.62e-07	4.99e-07	1.85e-08	9.55e-10	7.98e-07	NaN	3.04296	0.328627	0.625583	0.0232047	0.00119657	1.1975	0.835072	1.28639	0.0526328	0.261931	2.54109	0.393531	0.486308	0.440879	0.00456826
SF2	27	1	14	14	8	F7	L14 FP2	1.90291	1.88917	1.89419	1.70125	1.83977	1.37e-06	4.51e-07	9.04e-07	6.06e-08	3.52e-09	7.86e-07	NaN	1.74341	0.57359	1.15094	0.0771162	0.00447897	1.18097	0.846765	1.40396	0.117413	0.380671	1.47626	0.677389	0.819775	0.656793	0.011766
VIN3-1	14	1	14	14	11	G1	L13 FP1	1.89573	1.88057	1.89408	1.71263	1.85312	1.11e-06	4.85e-07	1.23e-06	2.3e-07	3.58e-10	7.33e-07	NaN	1.51059	0.661995	1.67542	0.313951	0.000488818	1.10646	0.90378	1.26528	0.0845845	0.272242	1.36524	0.732473	1.32415	3.71169	0.00179553
VIN3-1	1	1	14	14	7	B5	L13 FP2	1.89875	1.88871	1.90457	1.75288	1.86615	3.69e-06	6.47e-07	1.85e-06	1.07e-07	2.63e-10	1.55e-06	NaN	2.38805	0.418751	1.19979	0.0690894	0.000170265	1.15194	0.868098	1.27151	0.0444998	0.257212	2.07306	0.482378	0.943599	1.55258	0.000661964
VIN3-1	1	1	14	14	18	G11	L13 FP3	1.89072	1.88949	1.88744	1.71232	1.82196	2.31e-06	5.59e-07	1.27e-06	5.75e-08	2.35e-10	1.14e-06	NaN	2.03229	0.492055	1.11851	0.0505487	0.000206733	1.27937	0.781632	1.35391	0.0931663	0.461608	1.58851	0.629522	0.82613	0.542564	0.000447853
VIN3-1	14	1	14	14	13	C9	L13 FP3	1.89072	1.88949	1.88744	1.71232	1.82196	1.19e-06	3.11e-07	1.35e-06	1.6e-07	3.57e-10	6.09e-07	NaN	1.95521	0.511454	2.21518	0.262052	0.00058623	1.27937	0.781632	1.35391	0.0931663	0.461608	1.52826	0.654341	1.63613	2.81274	0.00126997
VIN3-1	27	1	14	14	2	B11	L13 FP3	1.89072	1.88949	1.88744	1.71232	1.82196	1.62e-06	2.94e-07	9.28e-07	4.05e-08	7.72e-10	6.91e-07	NaN	2.352	0.42517	1.34356	0.0585685	0.00111838	1.27937	0.781632	1.35391	0.0931663	0.461608	1.8384	0.543951	0.992354	0.628645	0.0024228
VIN3-1	27	1	14	14	25	B2	L14 FP1	1.89844	1.8983	1.90667	1.7481	1.86582	3.75e-06	6.37e-07	2.35e-06	6.95e-08	2.17e-10	1.54e-06	NaN	2.42507	0.412359	1.52463	0.044976	0.0001407	1.1975	0.835072	1.28639	0.0526328	0.261931	2.02511	0.4938	1.1852	0.854524	0.000537164
SF2	2	2	21	21	9	C7	L13 FP2	1.89875	1.88871	1.90457	1.75288	1.86615	2.32e-06	5.14e-07	1.01e-06	3.06e-08	6.7e-09	1.09e-06	NaN	2.1251	0.470566	0.924189	0.028061	0.00613613	1.15194	0.868098	1.27151	0.0444998	0.257212	1.8448	0.542065	0.726845	0.630586	0.0238563
SF2	15	2	21	21	16	F7	L13 FP2	1.89875	1.88871	1.90457	1.75288	1.86615	2.59e-06	8.77e-07	1.44e-06	2.33e-08	5.89e-09	1.51e-06	NaN	1.71734	0.582295	0.954309	0.0154478	0.00391053	1.15194	0.868098	1.27151	0.0444998	0.257212	1.49082	0.670771	0.750533	0.347144	0.0152035
SF2	2	2	21	21	5	G4	L14 FP1	1.89844	1.8983	1.90667	1.7481	1.86582	1.34e-06	2.45e-07	5.46e-07	7.92e-09	2.3e-09	5.72e-07	NaN	2.33733	0.427839	0.955205	0.0138544	0.00401646	1.1975	0.835072	1.28639	0.0526328	0.261931	1.95184	0.512338	0.742545	0.263227	0.015334
SF2	15	2	21	21	8	G1	L14 FP1	1.89844	1.8983	1.90667	1.7481	1.86582	2.66e-06	4.01e-07	6.7e-07	1.51e-08	2.01e-09	1.03e-06	NaN	2.57428	0.388459	0.649344	0.0146341	0.00195077	1.1975	0.835072	1.28639	0.0526328	0.261931	2.14971	0.46518	0.504779	0.278041	0.00744766
SF2	28	2	21	21	1	C9	L14 FP3	1.90042	1.89864	1.90099	1.75084	1.8638	1.18e-06	4.23e-07	1.08e-06	3.93e-08	5.67e-09	7.08e-07	NaN	1.67245	0.597927	1.52209	0.0554856	0.00801566	1.1845	0.844238	1.36607	0.0503837	0.263873	1.41194	0.708245	1.11422	1.10126	0.030377
SF2	28	2	21	21	27	E12	L14 FP3	1.90042	1.89864	1.90099	1.75084	1.8638	2.6e-06	6.89e-07	9.33e-07	2.7e-08	1.93e-08	1.34e-06	NaN	1.94336	0.514574	0.696466	0.0201357	0.0144296	1.1845	0.844238	1.36607	0.0503837	0.263873	1.64065	0.609513	0.509833	0.399646	0.054684
VIN3-1	15	2	21	21	25	E7	L13 FP2	1.89875	1.88871	1.90457	1.75288	1.86615	3.27e-06	9.79e-07	1.77e-06	2.62e-08	3.21e-10	1.79e-06	NaN	1.82805	0.54703	0.989083	0.0146422	0.00017951	1.15194	0.868098	1.27151	0.0444998	0.257212	1.58693	0.630148	0.777882	0.32904	0.000697905
VIN3-1	2	2	21	21	1	E9	L13 FP3	1.89072	1.88949	1.88744	1.71232	1.82196	6.14e-08	1.21e-08	3.74e-08	1.23e-09	0	2.73e-08	Bad UBC	2.25114	0.444219	1.37102	0.0450882	0	1.27937	0.781632	1.35391	0.0931663	0.461608	1.75956	0.568323	1.01264	0.483954	NaN
VIN3-1	28	2	21	21	10	C10	L13 FP3	1.89072	1.88949	1.88744	1.71232	1.82196	1.26e-06	2.71e-07	7.55e-07	3.51e-08	4.48e-10	5.86e-07	NaN	2.15814	0.463362	1.28883	0.0599816	0.000765117	1.27937	0.781632	1.35391	0.0931663	0.461608	1.68687	0.592814	0.951928	0.643813	0.0016575
VIN3-1	28	2	21	21	14	E11	L13 FP3	1.89072	1.88949	1.88744	1.71232	1.82196	2.43e-06	4.5e-07	1.17e-06	3.09e-08	1.09e-09	1.05e-06	NaN	2.3257	0.429979	1.11489	0.0295796	0.00104009	1.27937	0.781632	1.35391	0.0931663	0.461608	1.81784	0.550104	0.823456	0.317493	0.00225318
VIN3-1	2	2	21	21	22	G6	L14 FP2	1.90291	1.88917	1.89419	1.70125	1.83977	1.37e-06	5.53e-07	1.3e-06	6.78e-08	0	8.69e-07	NaN	1.57173	0.636242	1.5009	0.0780033	0	1.18097	0.846765	1.40396	0.117413	0.380671	1.33088	0.75138	1.06905	0.664348	NaN
VIN3-1	15	2	21	21	9	F11	L14 FP3	1.90042	1.89864	1.90099	1.75084	1.8638	1.67e-06	6.48e-07	1.43e-06	2.21e-08	1.31e-10	1.04e-06	NaN	1.60422	0.623356	1.37836	0.0212705	0.000125875	1.1845	0.844238	1.36607	0.0503837	0.263873	1.35434	0.738365	1.009	0.42217	0.000477031
SF2	16	3	28	28	25	E5	L13 FP2	1.89875	1.88871	1.90457	1.75288	1.86615	3e-06	7.09e-07	1.03e-06	1.79e-08	4.49e-08	1.46e-06	NaN	2.05769	0.485982	0.704927	0.0122526	0.0308204	1.15194	0.868098	1.27151	0.0444998	0.257212	1.78628	0.559824	0.554402	0.275341	0.119825
SF2	29	3	28	28	4	C12	L13 FP3	1.89072	1.88949	1.88744	1.71232	1.82196	9.79e-07	5.12e-07	7.83e-07	1.71e-08	2.98e-08	7.08e-07	NaN	1.38207	0.723551	1.10565	0.0241256	0.0420538	1.27937	0.781632	1.35391	0.0931663	0.461608	1.08027	0.925693	0.816637	0.258952	0.0911028
SF2	3	3	28	28	22	E3	L14 FP1	1.89844	1.8983	1.90667	1.7481	1.86582	1.58e-06	3.24e-07	6.64e-07	1.18e-08	4.72e-08	7.14e-07	NaN	2.20769	0.452963	0.928903	0.0165267	0.0661037	1.1975	0.835072	1.28639	0.0526328	0.261931	1.84358	0.542423	0.722098	0.314	0.252371
SF2	16	3	28	28	21	D3	L14 FP1	1.89844	1.8983	1.90667	1.7481	1.86582	2.72e-06	5.69e-07	7.62e-07	2.87e-08	3.47e-08	1.24e-06	NaN	2.18732	0.45718	0.61277	0.0230887	0.027905	1.1975	0.835072	1.28639	0.0526328	0.261931	1.82657	0.547474	0.476347	0.438676	0.106536
SF2	3	3	28	28	18	C12	L14 FP3	1.90042	1.89864	1.90099	1.75084	1.8638	5.7e-07	1.99e-07	2.65e-07	3.91e-09	1.93e-08	3.37e-07	NaN	1.6936	0.590458	0.787505	0.0116174	0.057477	1.1845	0.844238	1.36607	0.0503837	0.263873	1.4298	0.699397	0.576476	0.230579	0.217821
SF2	29	3	28	28	17	B10	L14 FP3	1.90042	1.89864	1.90099	1.75084	1.8638	1.11e-06	2.36e-07	2.83e-07	4.44e-09	1.21e-08	5.12e-07	NaN	2.17352	0.460082	0.552869	0.00865939	0.023663	1.1845	0.844238	1.36607	0.0503837	0.263873	1.83497	0.544967	0.404716	0.171869	0.0896758
VIN3-1	16	3	28	28	6	B1	L13 FP1	1.89573	1.88057	1.89408	1.71263	1.85312	1.54e-06	4.14e-07	1.62e-06	3.35e-08	1.1e-08	7.97e-07	NaN	1.92735	0.518847	2.03653	0.0420135	0.0138068	1.10646	0.90378	1.26528	0.0845845	0.272242	1.7419	0.574085	1.60955	0.496705	0.050715
VIN3-1	16	3	28	28	18	G6	L13 FP2	1.89875	1.88871	1.90457	1.75288	1.86615	2.26e-06	9.44e-07	1.17e-06	1.77e-08	2.51e-10	1.46e-06	NaN	1.54568	0.646964	0.798999	0.0121299	0.000171745	1.15194	0.868098	1.27151	0.0444998	0.257212	1.3418	0.745266	0.628386	0.272584	0.000667718
VIN3-1	3	3	28	28	15	D10	L13 FP3	1.89072	1.88949	1.88744	1.71232	1.82196	1.48e-06	4.22e-07	1.08e-06	3.65e-08	7.63e-10	7.89e-07	NaN	1.8692	0.534987	1.37162	0.0461919	0.000967394	1.27937	0.781632	1.35391	0.0931663	0.461608	1.46103	0.684449	1.01307	0.4958	0.0020957
VIN3-1	29	3	28	28	18	D9	L13 FP3	1.89072	1.88949	1.88744	1.71232	1.82196	1.34e-06	4.46e-07	8.66e-07	1.77e-08	7.61e-10	7.73e-07	NaN	1.73355	0.576852	1.11949	0.0229509	0.00098465	1.27937	0.781632	1.35391	0.0931663	0.461608	1.355	0.73801	0.826855	0.246343	0.00213308
VIN3-1	16	3	28	28	7	D4	L14 FP1	1.89844	1.8983	1.90667	1.7481	1.86582	8.79e-07	2.23e-07	3.75e-07	1.03e-08	2.21e-10	4.42e-07	NaN	1.98678	0.503328	0.847824	0.0232198	0.000499177	1.1975	0.835072	1.28639	0.0526328	0.261931	1.6591	0.602736	0.65907	0.441165	0.00190576
VIN3-1	29	3	28	28	3	E5	L14 FP2	1.90291	1.88917	1.89419	1.70125	1.83977	1.21e-06	2.49e-07	6.04e-07	2.67e-08	5.58e-10	5.49e-07	NaN	2.20087	0.454366	1.10094	0.0487453	0.0010179	1.18097	0.846765	1.40396	0.117413	0.380671	1.86362	0.53659	0.784162	0.41516	0.00267396
VIN3-1	3	3	28	28	13	H10	L14 FP3	1.90042	1.89864	1.90099	1.75084	1.8638	1.44e-06	3.34e-07	7e-07	6.96e-09	8.03e-11	6.95e-07	NaN	2.07795	0.481243	1.00746	0.0100161	0.000115546	1.1845	0.844238	1.36607	0.0503837	0.263873	1.75428	0.570033	0.737487	0.198796	0.000437886
SF2	4	4	35	35	27	H4	L13 FP1	1.89573	1.88057	1.89408	1.71263	1.85312	3.14e-08	1.42e-08	1.43e-08	9.36e-10	4.32e-09	2.11e-08	Bad UBC	1.48657	0.67269	0.67752	0.0442673	0.204167	1.10646	0.90378	1.26528	0.0845845	0.272242	1.34353	0.744307	0.535469	0.52335	0.749947
SF2	4	4	35	35	29	F4	L13 FP1	1.89573	1.88057	1.89408	1.71263	1.85312	1.5e-06	5.77e-07	9.87e-07	2.21e-08	1.25e-07	9.3e-07	NaN	1.61363	0.61972	1.06068	0.0237803	0.134842	1.10646	0.90378	1.26528	0.0845845	0.272242	1.45837	0.685697	0.838296	0.281142	0.495303
SF2	17	4	35	35	15	B8	L13 FP2	1.89875	1.88871	1.90457	1.75288	1.86615	2.21e-06	8.38e-07	7.55e-07	8.33e-09	1.2e-07	1.36e-06	NaN	1.62535	0.615251	0.554302	0.00611971	0.0879387	1.15194	0.868098	1.27151	0.0444998	0.257212	1.41097	0.708735	0.43594	0.137522	0.341891
SF2	30	4	35	35	4	D8	L13 FP2	1.89875	1.88871	1.90457	1.75288	1.86615	1.58e-06	5.86e-07	5.96e-07	5.55e-09	1.14e-07	9.61e-07	NaN	1.64013	0.609707	0.620805	0.00578003	0.118921	1.15194	0.868098	1.27151	0.0444998	0.257212	1.42379	0.702349	0.488243	0.129889	0.462344
SF2	4	4	35	35	6	E10	L13 FP3	1.89072	1.88949	1.88744	1.71232	1.82196	1.31e-06	3.17e-07	9.23e-07	1.9e-08	1.43e-07	6.46e-07	NaN	2.03378	0.491695	1.42999	0.0294019	0.221129	1.27937	0.781632	1.35391	0.0931663	0.461608	1.58967	0.629062	1.05619	0.315585	0.47904
SF2	17	4	35	35	9	F8	L14 FP2	1.90291	1.88917	1.89419	1.70125	1.83977	2.22e-06	7.32e-07	5.65e-07	2.37e-08	1.98e-07	1.28e-06	NaN	1.7416	0.574185	0.442882	0.0185711	0.154955	1.18097	0.846765	1.40396	0.117413	0.380671	1.47473	0.678092	0.315451	0.158169	0.407057
SF2	30	4	35	35	1	C7	L14 FP2	1.90291	1.88917	1.89419	1.70125	1.83977	6.04e-07	3.08e-07	3.78e-07	2.1e-08	8.06e-08	4.31e-07	NaN	1.40045	0.714055	0.877183	0.0487133	0.187037	1.18097	0.846765	1.40396	0.117413	0.380671	1.18585	0.843274	0.62479	0.414888	0.491335
VIN3-1	30	4	35	35	9	F1	L13 FP1	1.89573	1.88057	1.89408	1.71263	1.85312	1.25e-06	5.98e-07	1.11e-06	4.12e-08	1.73e-09	8.63e-07	NaN	1.44349	0.692767	1.28189	0.0477298	0.00200545	1.10646	0.90378	1.26528	0.0845845	0.272242	1.30459	0.766522	1.01312	0.564286	0.00736641
VIN3-1	4	4	35	35	4	H12	L13 FP3	1.89072	1.88949	1.88744	1.71232	1.82196	1.19e-06	4.76e-07	1.28e-06	2e-08	1.16e-09	7.52e-07	NaN	1.58048	0.632719	1.70488	0.0266104	0.00154207	1.27937	0.781632	1.35391	0.0931663	0.461608	1.23535	0.809484	1.25922	0.285622	0.00334065
VIN3-1	17	4	35	35	16	G12	L13 FP3	1.89072	1.88949	1.88744	1.71232	1.82196	1.36e-06	5.66e-07	1.11e-06	2.61e-08	1.72e-09	8.77e-07	NaN	1.54891	0.645614	1.26221	0.0297674	0.00195999	1.27937	0.781632	1.35391	0.0931663	0.461608	1.21068	0.825981	0.932267	0.319508	0.00424601
VIN3-1	30	4	35	35	19	H4	L14 FP1	1.89844	1.8983	1.90667	1.7481	1.86582	1.92e-06	5.46e-07	8.25e-07	9.2e-09	1.52e-09	1.02e-06	NaN	1.87578	0.533113	0.806033	0.00898723	0.00148783	1.1975	0.835072	1.28639	0.0526328	0.261931	1.56641	0.638404	0.626583	0.170753	0.00568024
VIN3-1	4	4	35	35	17	B11	L14 FP3	1.90042	1.89864	1.90099	1.75084	1.8638	1.41e-06	6.22e-07	1.22e-06	1.58e-08	1.17e-09	9.36e-07	NaN	1.50487	0.66451	1.30307	0.0168403	0.00125134	1.1845	0.844238	1.36607	0.0503837	0.263873	1.27047	0.787112	0.953881	0.334242	0.00474222
VIN3-1	17	4	35	35	28	D10	L14 FP3	1.90042	1.89864	1.90099	1.75084	1.8638	1.18e-06	2.8e-07	5.34e-07	9.04e-09	5e-10	5.74e-07	NaN	2.04952	0.487919	0.930516	0.0157501	0.000871652	1.1845	0.844238	1.36607	0.0503837	0.263873	1.73028	0.57794	0.681165	0.312604	0.0033033
SF2	5	5	42	42	10	C8	L13 FP2	1.89875	1.88871	1.90457	1.75288	1.86615	2.07e-06	7.52e-07	8.65e-07	1.53e-08	1.15e-07	1.25e-06	NaN	1.65944	0.602612	0.693063	0.01225	0.0922504	1.15194	0.868098	1.27151	0.0444998	0.257212	1.44056	0.694175	0.545072	0.275281	0.358655
SF2	5	5	42	42	28	F6	L13 FP2	1.89875	1.88871	1.90457	1.75288	1.86615	2.38e-06	6.92e-07	7.59e-07	1.11e-08	3.36e-07	1.28e-06	NaN	1.85578	0.538857	0.590665	0.00863139	0.261805	1.15194	0.868098	1.27151	0.0444998	0.257212	1.611	0.620733	0.464539	0.193965	1.01786
SF2	18	5	42	42	18	E7	L14 FP2	1.90291	1.88917	1.89419	1.70125	1.83977	9.29e-07	3.54e-07	4.02e-07	2.04e-08	2.05e-07	5.74e-07	NaN	1.61909	0.617632	0.70015	0.0356333	0.358053	1.18097	0.846765	1.40396	0.117413	0.380671	1.37099	0.729402	0.498695	0.303486	0.940584
SF2	18	5	42	42	19	H6	L14 FP2	1.90291	1.88917	1.89419	1.70125	1.83977	0	4.24e-14	0	0	0	0	NaN	NaN	NaN	NaN	NaN	NaN	NaN	NaN	NaN	NaN	NaN	NaN	NaN	NaN	NaN	NaN
SF2	31	5	42	42	20	H7	L14 FP2	1.90291	1.88917	1.89419	1.70125	1.83977	1.51e-06	5.81e-07	5.44e-07	1.12e-08	1.97e-07	9.37e-07	NaN	1.61253	0.620144	0.580777	0.0119429	0.210104	1.18097	0.846765	1.40396	0.117413	0.380671	1.36543	0.732369	0.413669	0.101717	0.551931
SF2	31	5	42	42	1	G10	L14 FP3	1.90042	1.89864	1.90099	1.75084	1.8638	1.3e-06	2.63e-07	3.56e-07	8.22e-09	7.02e-08	5.84e-07	NaN	2.22243	0.449959	0.608875	0.0140684	0.120241	1.1845	0.844238	1.36607	0.0503837	0.263873	1.87626	0.532976	0.445714	0.279226	0.455677
VIN3-1	18	5	42	42	22	B2	L13 FP1	1.89573	1.88057	1.89408	1.71263	1.85312	1.1e-06	3.1e-07	6.6e-07	2.18e-08	1.91e-09	5.83e-07	NaN	1.87904	0.532187	1.13126	0.0374084	0.00326647	1.10646	0.90378	1.26528	0.0845845	0.272242	1.69824	0.588845	0.894078	0.442261	0.0119984
VIN3-1	31	5	42	42	19	G7	L13 FP2	1.89875	1.88871	1.90457	1.75288	1.86615	2.99e-06	9.26e-07	1.33e-06	1.73e-08	5.21e-09	1.66e-06	NaN	1.79584	0.556841	0.801899	0.0104085	0.00313519	1.15194	0.868098	1.27151	0.0444998	0.257212	1.55897	0.641449	0.630668	0.233899	0.0121891
VIN3-1	5	5	42	42	7	H2	L14 FP1	1.89844	1.8983	1.90667	1.7481	1.86582	2.91e-06	3.11e-07	6.92e-07	2.25e-08	7.32e-10	9.51e-07	NaN	3.05619	0.327205	0.728078	0.0236504	0.000770102	1.1975	0.835072	1.28639	0.0526328	0.261931	2.55213	0.391829	0.565983	0.449347	0.0029401
VIN3-1	18	5	42	42	17	C3	L14 FP1	1.89844	1.8983	1.90667	1.7481	1.86582	1.61e-06	3.86e-07	8.28e-07	1.9e-08	9.53e-10	7.88e-07	NaN	2.03948	0.490321	1.05087	0.0240567	0.00120951	1.1975	0.835072	1.28639	0.0526328	0.261931	1.70311	0.58716	0.81691	0.457066	0.00461767
VIN3-1	31	5	42	42	12	H1	L14 FP1	1.89844	1.8983	1.90667	1.7481	1.86582	1.89e-06	2.9e-07	4.21e-07	1.3e-08	2.86e-10	7.4e-07	NaN	2.55235	0.391795	0.568981	0.017492	0.000386833	1.1975	0.835072	1.28639	0.0526328	0.261931	2.1314	0.469176	0.442307	0.33234	0.00147685
VIN3-1	5	5	42	42	13	G11	L14 FP3	1.90042	1.89864	1.90099	1.75084	1.8638	2.24e-06	5.73e-07	1.06e-06	2.56e-08	9.14e-10	1.13e-06	NaN	1.97762	0.505659	0.933354	0.0225826	0.000807206	1.1845	0.844238	1.36607	0.0503837	0.263873	1.66958	0.598953	0.683242	0.448213	0.00305908
SF2	19	6	49	49	4	E3	L13 FP1	1.89573	1.88057	1.89408	1.71263	1.85312	1.72e-06	9.37e-07	3.7e-07	1.07e-08	4.27e-07	1.27e-06	NaN	1.35347	0.73884	0.291353	0.00844876	0.336508	1.10646	0.90378	1.26528	0.0845845	0.272242	1.22324	0.8175	0.230267	0.0998855	1.23606
SF2	19	6	49	49	20	E4	L13 FP1	1.89573	1.88057	1.89408	1.71263	1.85312	3.99e-08	2.01e-08	8.25e-09	3.53e-10	9.79e-09	2.83e-08	NaN	1.40796	0.710248	0.291363	0.0124423	0.345442	1.10646	0.90378	1.26528	0.0845845	0.272242	1.27248	0.785864	0.230275	0.1471	1.26888
SF2	32	6	49	49	22	D1	L13 FP1	1.89573	1.88057	1.89408	1.71263	1.85312	3.86e-08	1.66e-08	9.62e-09	5.23e-10	9.29e-09	2.53e-08	Bad UBC	1.52512	0.655684	0.380332	0.0206557	0.367303	1.10646	0.90378	1.26528	0.0845845	0.272242	1.37838	0.725491	0.300591	0.244202	1.34918
SF2	32	6	49	49	21	G9	L13 FP3	1.89072	1.88949	1.88744	1.71232	1.82196	6.61e-07	3.22e-07	1.62e-07	2.42e-09	1.25e-07	4.61e-07	NaN	1.43244	0.698111	0.350868	0.00524728	0.271875	1.27937	0.781632	1.35391	0.0931663	0.461608	1.11964	0.893145	0.259151	0.0563217	0.588973
SF2	6	6	49	49	21	D9	L14 FP3	1.90042	1.89864	1.90099	1.75084	1.8638	7.35e-07	2.72e-07	2.04e-07	3.32e-09	1.34e-07	4.47e-07	NaN	1.6428	0.608717	0.456377	0.0074278	0.300788	1.1845	0.844238	1.36607	0.0503837	0.263873	1.38691	0.721025	0.334081	0.147425	1.1399
SF2	6	6	49	49	6	D12	L14 FP3	1.90042	1.89864	1.90099	1.75084	1.8638	1.38e-06	7.66e-07	3.2e-07	4.45e-09	2.61e-07	1.03e-06	NaN	1.34403	0.744033	0.310657	0.0043246	0.253098	1.1845	0.844238	1.36607	0.0503837	0.263873	1.13468	0.881308	0.22741	0.0858333	0.959169
VIN3-1	19	6	49	49	19	F2	L13 FP1	1.89573	1.88057	1.89408	1.71263	1.85312	1.74e-06	8.09e-07	7.32e-07	1.9e-08	4.24e-09	1.19e-06	NaN	1.46483	0.682671	0.617682	0.015991	0.00357933	1.10646	0.90378	1.26528	0.0845845	0.272242	1.32389	0.755351	0.488177	0.189054	0.0131476
VIN3-1	32	6	49	49	7	G4	L13 FP1	1.89573	1.88057	1.89408	1.71263	1.85312	1.14e-06	5.06e-07	4.85e-07	1.32e-08	2.27e-09	7.6e-07	NaN	1.50234	0.665629	0.637693	0.0172962	0.00298934	1.10646	0.90378	1.26528	0.0845845	0.272242	1.35778	0.736495	0.503992	0.204484	0.0109804
VIN3-1	19	6	49	49	26	H7	L13 FP2	1.89875	1.88871	1.90457	1.75288	1.86615	2.44e-06	8.53e-07	6.04e-07	7.06e-09	1.34e-09	1.44e-06	NaN	1.69257	0.590819	0.417903	0.00488736	0.000930041	1.15194	0.868098	1.27151	0.0444998	0.257212	1.46931	0.68059	0.328667	0.109829	0.00361585
VIN3-1	6	6	49	49	19	D12	L13 FP3	1.89072	1.88949	1.88744	1.71232	1.82196	1.02e-06	3.98e-07	4.06e-07	1.59e-08	5.76e-09	6.37e-07	NaN	1.60006	0.624977	0.636446	0.0248955	0.00903929	1.27937	0.781632	1.35391	0.0931663	0.461608	1.25066	0.79958	0.470079	0.267215	0.0195822
VIN3-1	6	6	49	49	12	G3	L14 FP1	1.89844	1.8983	1.90667	1.7481	1.86582	3.39e-06	9.5e-07	1.16e-06	3.81e-08	1.2e-08	1.79e-06	NaN	1.88818	0.529611	0.6468	0.021216	0.00670096	1.1975	0.835072	1.28639	0.0526328	0.261931	1.57676	0.63421	0.502801	0.403095	0.025583
VIN3-1	32	6	49	49	28	D2	L14 FP1	1.89844	1.8983	1.90667	1.7481	1.86582	1.95e-06	3.83e-07	3.38e-07	6.25e-09	1.76e-09	8.65e-07	NaN	2.25698	0.443069	0.390794	0.00722388	0.00203928	1.1975	0.835072	1.28639	0.0526328	0.261931	1.88474	0.530576	0.30379	0.137251	0.00778559
SF2	20	7	56	56	20	E12	L13 FP3	1.89072	1.88949	1.88744	1.71232	1.82196	1.41e-06	5.63e-07	3.01e-07	7.86e-09	5.46e-07	8.92e-07	NaN	1.58524	0.630818	0.337835	0.00880833	0.611905	1.27937	0.781632	1.35391	0.0931663	0.461608	1.23908	0.807053	0.249525	0.0945441	1.32559
SF2	20	7	56	56	14	F12	L13 FP3	1.89072	1.88949	1.88744	1.71232	1.82196	1.61e-06	6.23e-07	4.25e-07	1.14e-08	7.26e-07	1e-06	NaN	1.60947	0.621323	0.423771	0.0114149	0.723971	1.27937	0.781632	1.35391	0.0931663	0.461608	1.25801	0.794904	0.312997	0.122522	1.56837
SF2	33	7	56	56	12	F9	L13 FP3	1.89072	1.88949	1.88744	1.71232	1.82196	1.78e-06	6.22e-07	5.07e-07	8.58e-09	4.63e-07	1.05e-06	NaN	1.69256	0.59082	0.481848	0.00815194	0.4397	1.27937	0.781632	1.35391	0.0931663	0.461608	1.32296	0.75588	0.355893	0.0874988	0.952538
SF2	7	7	56	56	23	C6	L14 FP2	1.90291	1.88917	1.89419	1.70125	1.83977	1.11e-06	4.04e-07	3.04e-07	1.97e-08	7.11e-07	6.69e-07	NaN	1.65689	0.603541	0.453756	0.0294507	1.06244	1.18097	0.846765	1.40396	0.117413	0.380671	1.40299	0.712761	0.323196	0.25083	2.79097
SF2	7	7	56	56	9	F9	L14 FP3	1.90042	1.89864	1.90099	1.75084	1.8638	2.51e-06	7.49e-07	5.02e-07	7.21e-09	5.64e-07	1.37e-06	NaN	1.82846	0.546909	0.366548	0.0052614	0.411585	1.1845	0.844238	1.36607	0.0503837	0.263873	1.54365	0.647814	0.268324	0.104427	1.55979
SF2	33	7	56	56	18	C10	L14 FP3	1.90042	1.89864	1.90099	1.75084	1.8638	1.66e-06	4.58e-07	2.98e-07	5.12e-09	4.43e-07	8.73e-07	NaN	1.90595	0.524671	0.341623	0.00586076	0.50701	1.1845	0.844238	1.36607	0.0503837	0.263873	1.60908	0.621473	0.250078	0.116323	1.92142
VIN3-1	20	7	56	56	21	H1	L13 FP1	1.89573	1.88057	1.89408	1.71263	1.85312	2.27e-08	1.54e-08	3.17e-08	1.48e-09	1.5e-10	1.87e-08	NaN	1.21609	0.822309	1.69918	0.0794937	0.00803433	1.10646	0.90378	1.26528	0.0845845	0.272242	1.09908	0.909855	1.34292	0.939815	0.0295117
VIN3-1	33	7	56	56	24	C4	L13 FP1	1.89573	1.88057	1.89408	1.71263	1.85312	1.88e-06	5.72e-07	6.8e-07	2.44e-08	9.61e-09	1.04e-06	NaN	1.81263	0.551683	0.655443	0.0235083	0.00926634	1.10646	0.90378	1.26528	0.0845845	0.272242	1.63822	0.610417	0.518021	0.277927	0.0340371
VIN3-1	33	7	56	56	14	E8	L13 FP2	1.89875	1.88871	1.90457	1.75288	1.86615	6.68e-07	2.69e-07	2.75e-07	2.84e-09	2.33e-09	4.24e-07	NaN	1.5761	0.634478	0.649866	0.00670676	0.00551189	1.15194	0.868098	1.27151	0.0444998	0.257212	1.36821	0.730882	0.511099	0.150714	0.0214294
VIN3-1	7	7	56	56	28	F3	L14 FP1	1.89844	1.8983	1.90667	1.7481	1.86582	1.46e-06	3.65e-07	4.01e-07	6.5e-09	3.26e-09	7.29e-07	NaN	1.99655	0.500863	0.550309	0.00890572	0.00447412	1.1975	0.835072	1.28639	0.0526328	0.261931	1.66726	0.599785	0.427792	0.169205	0.0170813
VIN3-1	20	7	56	56	6	H3	L14 FP1	1.89844	1.8983	1.90667	1.7481	1.86582	2.18e-06	5e-07	9.33e-07	1.43e-08	9.3e-09	1.04e-06	NaN	2.08651	0.479268	0.895021	0.0137187	0.00891982	1.1975	0.835072	1.28639	0.0526328	0.261931	1.74239	0.573925	0.69576	0.26065	0.0340541
VIN3-1	7	7	56	56	21	F12	L14 FP3	1.90042	1.89864	1.90099	1.75084	1.8638	2.27e-06	8.94e-07	6.15e-07	8.83e-09	6.02e-09	1.43e-06	NaN	1.59447	0.627167	0.431414	0.00619366	0.00422151	1.1845	0.844238	1.36607	0.0503837	0.263873	1.34611	0.742879	0.315808	0.12293	0.0159983
SF2	9	9	70	70	17	B1	L14 FP1	1.89844	1.8983	1.90667	1.7481	1.86582	1.55e-06	4.17e-07	7.85e-08	2.86e-09	1.73e-07	8.04e-07	NaN	1.92867	0.518491	0.0975692	0.00355028	0.215652	1.1975	0.835072	1.28639	0.0526328	0.261931	1.61058	0.620894	0.0758471	0.0674537	0.823318
SF2	22	9	70	70	21	C8	L14 FP2	1.90291	1.88917	1.89419	1.70125	1.83977	3.01e-06	1.04e-06	2.92e-07	1.29e-08	1.12e-06	1.77e-06	NaN	1.7019	0.587579	0.165076	0.0072883	0.635509	1.18097	0.846765	1.40396	0.117413	0.380671	1.44111	0.693911	0.117579	0.0620738	1.66944
SF2	22	9	70	70	18	G8	L14 FP2	1.90291	1.88917	1.89419	1.70125	1.83977	1.13e-06	4.87e-07	1.25e-07	3.04e-09	3.54e-07	7.41e-07	NaN	1.52115	0.657395	0.168792	0.00410059	0.477664	1.18097	0.846765	1.40396	0.117413	0.380671	1.28806	0.776361	0.120225	0.0349244	1.2548
SF2	35	9	70	70	7	E8	L14 FP2	1.90291	1.88917	1.89419	1.70125	1.83977	1.75e-06	6e-07	1.8e-07	6.08e-09	4.71e-07	1.02e-06	NaN	1.70926	0.585048	0.175277	0.0059347	0.459967	1.18097	0.846765	1.40396	0.117413	0.380671	1.44734	0.690922	0.124844	0.0505454	1.20831
SF2	9	9	70	70	13	H11	L14 FP3	1.90042	1.89864	1.90099	1.75084	1.8638	1.18e-06	3.66e-07	1.22e-07	2.62e-09	2.49e-07	6.57e-07	NaN	1.79541	0.556977	0.185655	0.00399503	0.378511	1.1845	0.844238	1.36607	0.0503837	0.263873	1.51575	0.659739	0.135905	0.0792922	1.43445
SF2	35	9	70	70	8	B12	L14 FP3	1.90042	1.89864	1.90099	1.75084	1.8638	2.65e-06	8.69e-07	2.16e-07	2.56e-09	3.12e-07	1.52e-06	NaN	1.74677	0.572484	0.14237	0.00168762	0.205204	1.1845	0.844238	1.36607	0.0503837	0.263873	1.47469	0.678107	0.104219	0.0334953	0.777662
VIN3-1	22	9	70	70	24	H3	L13 FP1	1.89573	1.88057	1.89408	1.71263	1.85312	5.69e-07	2.89e-07	1.44e-07	5.43e-09	2.68e-09	4.06e-07	NaN	1.40317	0.712674	0.354558	0.0133941	0.00660572	1.10646	0.90378	1.26528	0.0845845	0.272242	1.26815	0.788548	0.28022	0.158352	0.0242641
VIN3-1	9	9	70	70	18	B7	L13 FP2	1.89875	1.88871	1.90457	1.75288	1.86615	2.76e-06	9.18e-07	5.28e-07	6.72e-09	6.59e-09	1.59e-06	NaN	1.73304	0.577021	0.332026	0.00422641	0.00414573	1.15194	0.868098	1.27151	0.0444998	0.257212	1.50445	0.664696	0.261127	0.0949759	0.0161179
VIN3-1	35	9	70	70	13	H6	L13 FP2	1.89875	1.88871	1.90457	1.75288	1.86615	2.8e-06	9.91e-07	6.64e-07	9.87e-09	8.67e-09	1.67e-06	NaN	1.68207	0.594505	0.398399	0.00592466	0.00520393	1.15194	0.868098	1.27151	0.0444998	0.257212	1.4602	0.684836	0.313328	0.133139	0.020232
VIN3-1	9	9	70	70	12	F1	L14 FP1	1.89844	1.8983	1.90667	1.7481	1.86582	3.26e-06	6.18e-07	3.62e-07	5.38e-09	4.58e-09	1.42e-06	NaN	2.29486	0.435756	0.25538	0.00379166	0.00322814	1.1975	0.835072	1.28639	0.0526328	0.261931	1.91638	0.521818	0.198524	0.0720398	0.0123244
VIN3-1	22	9	70	70	13	H9	L14 FP3	1.90042	1.89864	1.90099	1.75084	1.8638	2.28e-06	4.75e-07	3.58e-07	4.99e-09	4.04e-09	1.04e-06	NaN	2.19215	0.456173	0.343862	0.00478909	0.0038816	1.1845	0.844238	1.36607	0.0503837	0.263873	1.8507	0.540337	0.251717	0.0950523	0.0147101
VIN3-1	35	9	70	70	26	E11	L14 FP3	1.90042	1.89864	1.90099	1.75084	1.8638	1.98e-06	6.4e-07	4.73e-07	6.08e-09	8.27e-09	1.12e-06	NaN	1.75758	0.568964	0.421149	0.005409	0.007356	1.1845	0.844238	1.36607	0.0503837	0.263873	1.48382	0.673938	0.308293	0.107356	0.0278771
SF2	36	10	77	77	14	H2	L13 FP1	1.89573	1.88057	1.89408	1.71263	1.85312	2.48e-06	8.65e-07	2.04e-07	2.03e-08	1.12e-06	1.47e-06	NaN	1.69308	0.590638	0.139093	0.0138893	0.762717	1.10646	0.90378	1.26528	0.0845845	0.272242	1.53018	0.653519	0.10993	0.164206	2.80162
SF2	36	10	77	77	13	B12	L13 FP3	1.89072	1.88949	1.88744	1.71232	1.82196	1.24e-06	7.48e-07	2.18e-07	1.87e-08	6.82e-07	9.64e-07	NaN	1.28917	0.775695	0.226523	0.019371	0.706683	1.27937	0.781632	1.35391	0.0931663	0.461608	1.00765	0.992404	0.16731	0.207918	1.53092
SF2	10	10	77	77	14	F2	L14 FP1	1.89844	1.8983	1.90667	1.7481	1.86582	2.89e-06	5.99e-07	9.23e-08	6.38e-09	3.51e-07	1.32e-06	NaN	2.19604	0.455365	0.0701432	0.00484955	0.266472	1.1975	0.835072	1.28639	0.0526328	0.261931	1.83385	0.5453	0.054527	0.0921394	1.01734
SF2	10	10	77	77	12	C5	L14 FP2	1.90291	1.88917	1.89419	1.70125	1.83977	2.08e-06	5.39e-07	1.55e-07	2.08e-08	4.83e-07	1.06e-06	NaN	1.96554	0.508766	0.146047	0.0196155	0.455906	1.18097	0.846765	1.40396	0.117413	0.380671	1.66435	0.600835	0.104025	0.167064	1.19764
SF2	23	10	77	77	22	F6	L14 FP2	1.90291	1.88917	1.89419	1.70125	1.83977	9.81e-07	4.65e-07	1.56e-07	2.47e-08	2.94e-07	6.75e-07	NaN	1.45282	0.688315	0.231523	0.0366183	0.435673	1.18097	0.846765	1.40396	0.117413	0.380671	1.2302	0.812876	0.164907	0.311875	1.14449
SF2	23	10	77	77	8	F10	L14 FP3	1.90042	1.89864	1.90099	1.75084	1.8638	1.56e-06	4.32e-07	1.18e-07	3.58e-09	1.82e-07	8.21e-07	NaN	1.8977	0.526955	0.144318	0.00436485	0.221506	1.1845	0.844238	1.36607	0.0503837	0.263873	1.60211	0.624178	0.105645	0.0866321	0.839442
VIN3-1	10	10	77	77	11	F5	L13 FP2	1.89875	1.88871	1.90457	1.75288	1.86615	2.91e-06	7.7e-07	6.74e-07	2.66e-08	1.31e-08	1.5e-06	NaN	1.94593	0.513892	0.449674	0.0177852	0.00876562	1.15194	0.868098	1.27151	0.0444998	0.257212	1.68926	0.591975	0.353654	0.399668	0.0340793
VIN3-1	36	10	77	77	10	E4	L14 FP1	1.89844	1.8983	1.90667	1.7481	1.86582	1.84e-06	4.97e-07	4.06e-07	8.74e-09	6.6e-08	9.55e-07	NaN	NaN	NaN	NaN	NaN	NaN	NaN	NaN	NaN	NaN	NaN	NaN	NaN	NaN	NaN	NaN
VIN3-1	10	10	77	77	22	B7	L14 FP2	1.90291	1.88917	1.89419	1.70125	1.83977	9.87e-07	5.42e-07	4.51e-07	3.81e-08	1.41e-08	7.32e-07	NaN	1.34905	0.74126	0.61689	0.0520322	0.0192585	1.18097	0.846765	1.40396	0.117413	0.380671	1.14233	0.875402	0.439392	0.443154	0.0505909
VIN3-1	23	10	77	77	11	E6	L14 FP2	1.90291	1.88917	1.89419	1.70125	1.83977	1.26e-06	5.7e-07	5.58e-07	5.25e-08	9e-09	8.46e-07	NaN	1.48463	0.673571	0.660208	0.0621254	0.0106348	1.18097	0.846765	1.40396	0.117413	0.380671	1.25713	0.795463	0.470246	0.529117	0.0279371
VIN3-1	23	10	77	77	23	H8	L14 FP2	1.90291	1.88917	1.89419	1.70125	1.83977	1.71e-06	6.37e-07	3.53e-07	2.1e-08	1.14e-08	1.04e-06	NaN	1.63934	0.610001	0.338556	0.0201078	0.0109666	1.18097	0.846765	1.40396	0.117413	0.380671	1.38814	0.72039	0.241143	0.171257	0.0288087
VIN3-1	36	10	77	77	5	B9	L14 FP3	1.90042	1.89864	1.90099	1.75084	1.8638	5.87e-08	2.72e-08	3.95e-08	5e-09	9.67e-10	3.99e-08	NaN	1.46932	0.680585	0.989018	0.125264	0.0242078	1.1845	0.844238	1.36607	0.0503837	0.263873	1.24046	0.806153	0.723989	2.48619	0.0917404
SF2	37	11	84	84	13	D2	L13 FP1	1.89573	1.88057	1.89408	1.71263	1.85312	1.49e-06	5.3e-07	5.86e-08	1.44e-09	5.05e-07	8.9e-07	NaN	1.67878	0.595671	0.0657808	0.00161256	0.567463	1.10646	0.90378	1.26528	0.0845845	0.272242	1.51725	0.659088	0.0519891	0.0190644	2.08441
SF2	37	11	84	84	25	H9	L13 FP3	1.89072	1.88949	1.88744	1.71232	1.82196	1.7e-06	5.17e-07	9.5e-08	1.8e-09	4.94e-07	9.37e-07	NaN	1.81382	0.551323	0.101318	0.00191527	0.526856	1.27937	0.781632	1.35391	0.0931663	0.461608	1.41774	0.705348	0.0748334	0.0205576	1.14135
SF2	11	11	84	84	12	C4	L14 FP1	1.89844	1.8983	1.90667	1.7481	1.86582	2.43e-06	9.56e-07	1.7e-07	1.17e-09	3.66e-07	1.53e-06	NaN	1.59597	0.626578	0.111728	0.000763829	0.23997	1.1975	0.835072	1.28639	0.0526328	0.261931	1.33275	0.750329	0.086854	0.0145124	0.916158
SF2	11	11	84	84	20	E9	L14 FP3	1.90042	1.89864	1.90099	1.75084	1.8638	1.26e-06	3.49e-07	5.25e-08	1.14e-09	2.58e-07	6.63e-07	NaN	1.9007	0.526121	0.0792239	0.00172433	0.389375	1.1845	0.844238	1.36607	0.0503837	0.263873	1.60465	0.62319	0.0579942	0.0342239	1.47562
SF2	24	11	84	84	23	G9	L14 FP3	1.90042	1.89864	1.90099	1.75084	1.8638	2.18e-06	8.23e-07	1.75e-07	1.14e-09	4.74e-07	1.34e-06	NaN	1.62666	0.614755	0.130483	0.000850526	0.354053	1.1845	0.844238	1.36607	0.0503837	0.263873	1.37329	0.728178	0.095517	0.016881	1.34176
SF2	24	11	84	84	8	G12	L14 FP3	1.90042	1.89864	1.90099	1.75084	1.8638	3.38e-06	1.58e-06	1.19e-07	7.29e-10	5.45e-07	2.31e-06	NaN	1.4634	0.683338	0.0513573	0.000315534	0.235737	1.1845	0.844238	1.36607	0.0503837	0.263873	1.23546	0.809414	0.037595	0.00626261	0.893375
VIN3-1	24	11	84	84	18	B3	L13 FP1	1.89573	1.88057	1.89408	1.71263	1.85312	4.69e-07	1.29e-07	1.22e-07	4.63e-09	2.73e-09	2.46e-07	NaN	1.90831	0.524024	0.494202	0.0188239	0.0111152	1.10646	0.90378	1.26528	0.0845845	0.272242	1.72469	0.579813	0.390586	0.222546	0.0408282
VIN3-1	37	11	84	84	11	E1	L13 FP1	1.89573	1.88057	1.89408	1.71263	1.85312	1.92e-06	7.21e-07	3.07e-07	9.94e-09	4.9e-09	1.18e-06	NaN	1.63065	0.613251	0.261325	0.00845717	0.00416811	1.10646	0.90378	1.26528	0.0845845	0.272242	1.47375	0.67854	0.206535	0.0999849	0.0153103
VIN3-1	11	11	84	84	24	H10	L13 FP3	1.89072	1.88949	1.88744	1.71232	1.82196	1.51e-06	4.82e-07	3.12e-07	5.3e-09	7.82e-09	8.54e-07	NaN	1.77309	0.563986	0.365063	0.00620611	0.00916019	1.27937	0.781632	1.35391	0.0931663	0.461608	1.38591	0.721549	0.269635	0.0666132	0.0198441
VIN3-1	24	11	84	84	1	E2	L14 FP1	1.89844	1.8983	1.90667	1.7481	1.86582	1.6e-06	3.14e-07	2.55e-07	2.9e-09	6.53e-09	7.1e-07	NaN	2.25836	0.442798	0.359237	0.00408213	0.00918906	1.1975	0.835072	1.28639	0.0526328	0.261931	1.8859	0.530252	0.279259	0.0775587	0.035082
VIN3-1	37	11	84	84	22	G2	L14 FP1	1.89844	1.8983	1.90667	1.7481	1.86582	1.95e-06	4.31e-07	1.41e-07	2.84e-09	5.33e-09	9.16e-07	NaN	2.12682	0.470186	0.153756	0.00309692	0.00581711	1.1975	0.835072	1.28639	0.0526328	0.261931	1.77605	0.563048	0.119525	0.0588402	0.0222086
VIN3-1	11	11	84	84	18	C11	L14 FP3	1.90042	1.89864	1.90099	1.75084	1.8638	8.33e-07	3.48e-07	1.9e-07	3.99e-09	3.27e-09	5.38e-07	NaN	1.5478	0.646078	0.353475	0.00741498	0.00607875	1.1845	0.844238	1.36607	0.0503837	0.263873	1.30671	0.765279	0.258754	0.14717	0.0230367
SF2	38	12	98	98	2	F3	L13 FP1	1.89573	1.88057	1.89408	1.71263	1.85312	1.74e-06	9.73e-07	7.77e-08	1.69e-09	4.92e-07	1.3e-06	NaN	1.33928	0.746671	0.0596376	0.00129545	0.377436	1.10646	0.90378	1.26528	0.0845845	0.272242	1.21041	0.826164	0.0471338	0.0153155	1.3864
SF2	38	12	98	98	1	E2	L13 FP1	1.89573	1.88057	1.89408	1.71263	1.85312	1.12e-06	4.63e-07	6.43e-08	3.29e-09	5.07e-07	7.2e-07	NaN	1.55452	0.643284	0.0893383	0.00457341	0.704284	1.10646	0.90378	1.26528	0.0845845	0.272242	1.40495	0.71177	0.0706074	0.0540691	2.58698
SF2	12	12	98	98	9	D7	L13 FP2	1.89875	1.88871	1.90457	1.75288	1.86615	3.05e-06	1.55e-06	2.08e-07	6.74e-09	9.04e-07	2.18e-06	NaN	1.40016	0.714202	0.0954881	0.00309629	0.415734	1.15194	0.868098	1.27151	0.0444998	0.257212	1.21548	0.822721	0.0750983	0.0695798	1.61631
SF2	12	12	98	98	20	F8	L13 FP2	1.89875	1.88871	1.90457	1.75288	1.86615	1.54e-06	1.01e-06	1.12e-07	3.39e-09	4.8e-07	1.25e-06	NaN	1.23904	0.807074	0.0899447	0.0027211	0.385451	1.15194	0.868098	1.27151	0.0444998	0.257212	1.07561	0.929703	0.0707386	0.0611484	1.49857
SF2	25	12	98	98	9	D5	L13 FP2	1.89875	1.88871	1.90457	1.75288	1.86615	2.48e-06	7.85e-07	6.05e-08	4.19e-09	7.37e-07	1.4e-06	NaN	1.77944	0.561974	0.0433124	0.00300369	0.527974	1.15194	0.868098	1.27151	0.0444998	0.257212	1.54473	0.647363	0.0340638	0.0674989	2.05268
SF2	25	12	98	98	11	C11	L13 FP3	1.89072	1.88949	1.88744	1.71232	1.82196	1.3e-06	5.64e-07	8.68e-08	3.94e-09	6.24e-07	8.56e-07	NaN	1.51804	0.658745	0.101407	0.00460002	0.728357	1.27937	0.781632	1.35391	0.0931663	0.461608	1.18655	0.842781	0.0748989	0.0493743	1.57787
VIN3-1	38	12	98	98	9	B6	L13 FP2	1.89875	1.88871	1.90457	1.75288	1.86615	2.43e-06	9.11e-07	4.5e-07	7.41e-09	9.56e-09	1.49e-06	NaN	1.6333	0.612258	0.302003	0.00497651	0.00642217	1.15194	0.868098	1.27151	0.0444998	0.257212	1.41786	0.705287	0.237516	0.111832	0.0249684
VIN3-1	12	12	98	98	23	H11	L13 FP3	1.89072	1.88949	1.88744	1.71232	1.82196	2.3e-06	7.52e-07	3.48e-07	1.99e-08	2.38e-08	1.32e-06	NaN	1.75026	0.571345	0.264631	0.0151292	0.0180812	1.27937	0.781632	1.35391	0.0931663	0.461608	1.36806	0.730964	0.195456	0.16239	0.03917
VIN3-1	25	12	98	98	1	B9	L13 FP3	1.89072	1.88949	1.88744	1.71232	1.82196	1.17e-06	4.54e-07	9.06e-07	2.52e-08	1.57e-08	7.28e-07	NaN	1.6031	0.62379	1.2447	0.0346991	0.0215336	1.27937	0.781632	1.35391	0.0931663	0.461608	1.25304	0.79806	0.919335	0.372443	0.0466491
VIN3-1	25	12	98	98	10	C1	L14 FP1	1.89844	1.8983	1.90667	1.7481	1.86582	3.87e-06	2.81e-06	1.82e-06	4.13e-08	3.42e-08	3.3e-06	NaN	1.1734	0.852227	0.55059	0.0125137	0.0103794	1.1975	0.835072	1.28639	0.0526328	0.261931	0.97987	1.02054	0.42801	0.237754	0.0396265
VIN3-1	38	12	98	98	5	C2	L14 FP1	1.89844	1.8983	1.90667	1.7481	1.86582	1.82e-06	3.32e-07	2.19e-07	4.5e-09	4.44e-09	7.78e-07	NaN	2.34413	0.426597	0.281484	0.00578269	0.0057025	1.1975	0.835072	1.28639	0.0526328	0.261931	1.95752	0.510851	0.218816	0.109869	0.021771
VIN3-1	12	12	98	98	17	G7	L14 FP2	1.90291	1.88917	1.89419	1.70125	1.83977	1.51e-06	9.57e-07	4.34e-07	1.64e-08	1.49e-08	1.2e-06	NaN	1.25767	0.795123	0.360173	0.0136312	0.0123801	1.18097	0.846765	1.40396	0.117413	0.380671	1.06495	0.939013	0.25654	0.116096	0.0325219
SF2	13	13	112	112	2	G3	L13 FP1	1.89573	1.88057	1.89408	1.71263	1.85312	1.65e-06	7.26e-07	2.68e-08	4.94e-09	1.31e-06	1.1e-06	NaN	1.50804	0.663114	0.0244445	0.00450776	1.19875	1.10646	0.90378	1.26528	0.0845845	0.272242	1.36293	0.733712	0.0193194	0.053293	4.40324
SF2	26	13	112	112	13	C3	L13 FP1	1.89573	1.88057	1.89408	1.71263	1.85312	1.85e-06	8.83e-07	4.31e-08	5.71e-09	1.2e-06	1.28e-06	NaN	1.44584	0.69164	0.0337266	0.00446848	0.937045	1.10646	0.90378	1.26528	0.0845845	0.272242	1.30672	0.765275	0.0266554	0.0528286	3.44196
SF2	26	13	112	112	28	G2	L13 FP1	1.89573	1.88057	1.89408	1.71263	1.85312	1.78e-06	7.64e-07	6.12e-08	6.58e-09	1.23e-06	1.17e-06	NaN	1.52562	0.655473	0.0524929	0.00564551	1.05806	1.10646	0.90378	1.26528	0.0845845	0.272242	1.37882	0.725257	0.0414871	0.0667441	3.88646
SF2	39	13	112	112	26	C2	L13 FP1	1.89573	1.88057	1.89408	1.71263	1.85312	6.88e-08	2.01e-08	1.72e-09	1.25e-09	7.45e-08	3.72e-08	NaN	1.8516	0.540074	0.0463527	0.0335961	2.00334	1.10646	0.90378	1.26528	0.0845845	0.272242	1.67344	0.597572	0.0366343	0.39719	7.35868
SF2	39	13	112	112	17	B3	L14 FP1	1.89844	1.8983	1.90667	1.7481	1.86582	2.31e-06	6.37e-07	4.91e-08	3.61e-09	1.32e-06	1.21e-06	NaN	1.90644	0.524538	0.0404281	0.00297351	1.08657	1.1975	0.835072	1.28639	0.0526328	0.261931	1.59201	0.628135	0.0314275	0.0564954	4.14831
SF2	13	13	112	112	25	D7	L14 FP2	1.90291	1.88917	1.89419	1.70125	1.83977	2.79e-06	1.33e-06	1.01e-07	1.7e-08	2.45e-06	1.93e-06	NaN	1.44793	0.690639	0.0522488	0.00883177	1.26682	1.18097	0.846765	1.40396	0.117413	0.380671	1.22606	0.815621	0.0372152	0.0752195	3.32785
VIN3-1	13	13	112	112	27	B4	L13 FP1	1.89573	1.88057	1.89408	1.71263	1.85312	1.5e-06	5.87e-07	2.64e-07	1.09e-08	4.53e-08	9.38e-07	NaN	1.59842	0.625619	0.28176	0.0115839	0.0482984	1.10646	0.90378	1.26528	0.0845845	0.272242	1.44462	0.692225	0.222685	0.13695	0.17741
VIN3-1	39	13	112	112	20	D3	L13 FP1	1.89573	1.88057	1.89408	1.71263	1.85312	3.02e-06	1.21e-06	3.66e-07	2.24e-08	9.33e-08	1.91e-06	NaN	1.57703	0.634104	0.191107	0.0117037	0.0487522	1.10646	0.90378	1.26528	0.0845845	0.272242	1.42529	0.701613	0.151039	0.138367	0.179077
VIN3-1	26	13	112	112	23	G8	L13 FP2	1.89875	1.88871	1.90457	1.75288	1.86615	2.87e-06	1.02e-06	3.77e-07	4.9e-09	2.38e-08	1.71e-06	NaN	1.68024	0.595153	0.2206	0.00287074	0.0139108	1.15194	0.868098	1.27151	0.0444998	0.257212	1.45861	0.685583	0.173495	0.0645113	0.0540828
VIN3-1	26	13	112	112	3	F11	L13 FP3	1.89072	1.88949	1.88744	1.71232	1.82196	4.03e-06	1.11e-06	4.82e-07	1.9e-08	9.47e-08	2.12e-06	NaN	1.90477	0.524997	0.227738	0.00899606	0.0447669	1.27937	0.781632	1.35391	0.0931663	0.461608	1.48883	0.671668	0.168207	0.0965591	0.0969803
VIN3-1	39	13	112	112	2	B4	L14 FP1	1.89844	1.8983	1.90667	1.7481	1.86582	2.39e-06	9.12e-07	4.57e-07	8.88e-09	3.53e-08	1.48e-06	NaN	1.61804	0.61803	0.30933	0.00601478	0.0239413	1.1975	0.835072	1.28639	0.0526328	0.261931	1.35118	0.740092	0.240463	0.114278	0.0914031
VIN3-1	13	13	112	112	17	F5	L14 FP2	1.90291	1.88917	1.89419	1.70125	1.83977	1.47e-06	3.68e-07	1.82e-07	8.86e-09	1.82e-08	7.34e-07	NaN	1.99737	0.500658	0.247376	0.0120708	0.024803	1.18097	0.846765	1.40396	0.117413	0.380671	1.6913	0.59126	0.176198	0.102806	0.0651561
