# Supplementary material for: Natural variation in autumn expression is the major adaptive determinant distinguishing Arabidopsis FLC haplotypes
Source: eLife. 2020 Sep 9;9:e57671. doi: 10.7554/eLife.57671 (PMC7518893; doi:10.7554/eLife.57671)
Supplement: Source data 4. [file elife-57671-data4.xlsx]

## Sheet: Key
Genotype
BRO	Bro1-6
BRON	Bro NIL
COL	Col-0
EDI	Edi-0
EDIN	Edi NIL
FCA	fca-9 fri
FLD	fld-4 fri
FVE	fve-3 fri
FCAF	fca-9 FRI
FLDF	fld-4 FRI
FVEF	fve-3 FRI
LHP	lhp1-3 FRI
LOV	Löv-1
NDX	ndx1-1 FRI
NIL1	Lov NIL1
NIL2	Lov NIL2
SDG8	sdg8 FRI
SF2	Col FRI
ULL	Ull2-5
ULLN	Ull NIL
VAL	val1-2 FRI
VAR	Var2-6
VARN	Var NIL
VIN3	vin3-4 FRI
VIN3-1	vin3-1 FRI
VRN1	vrn1-4 FRI
VRN2	vrn2-1 FRI
VRN5	vrn5-8 FRI
flc2	flc-2 FRI

## Sheet: Norwich 2014-15 flower & branch
block	column number	row numer	genotype	bud date	Days to budding from sowing	flowering date	Days to open flowers from sowing	Days from budding to flowering	Rosette branches	Secondary branches	Empty nodes	Date of sowing:
1	1	1	VIN3	2015-03-13	165	2015-04-20	203	38	1	7	2	2014-09-29
1	1	2	VARN	2015-02-20	144	2015-03-20	172	28	1	9	0
1	1	3	EDI	2015-02-11	135	2015-03-18	170	35	1	7	0
1	1	4	NIL2	2015-02-11	135	2015-03-13	165	30	1	6	3
1	1	5	FCA	2015-02-16	140	2015-03-27	179	39	3	8	0
1	1	6	flc2	2015-02-09	133	2015-03-16	168	35	2	8	1
1	1	7
1	1	8	FVE	2015-02-09	133	2015-03-13	165	32	1	5	1
1	1	9	SF2	2015-02-13	137	2015-03-13	165	28	1	5	1
1	1	10	NIL1	2015-02-16	140	2015-03-16	168	28	1	8	1
1	1	11	FLD	2015-02-25	149	2015-04-10	193	44	6	10	1
1	2	1	FCA	2015-02-16	140	2015-03-18	170	30	1	9	1
1	2	2	BRO	2015-02-23	147	2015-03-27	179	32	1	7	0
1	2	3	ULL	2015-02-20	144	2015-03-20	172	28	1	6	0
1	2	4	LOV	2015-02-18	142	2015-03-23	175	33	1	7	0
1	2	5	NDX	2015-02-23	147	2015-03-25	177	30	1	5	0
1	2	6	EDIN	2015-02-13	137	2015-03-16	168	31	1	8	0
1	2	7
1	2	8	VARN	2015-02-16	140	2015-03-13	165	25	1	4	2
1	2	9	VIN3	2015-03-13	165	2015-04-13	196	31	1	11	1
1	2	10	VRN2	2015-03-18	170	2015-04-13	196	26	1	7	0
1	2	11	VRN1	2015-03-11	163	2015-04-13	196	33	1	5	0
1	3	1	NIL2	2015-02-09	133	2015-03-13	165	32	1	6	1
1	3	2	FVE	2015-02-03	127	2015-03-16	168	41	1	6	0
1	3	3	LOV	2015-02-18	142	2015-03-25	177	35	1	6	1
1	3	4	BRO	2015-02-20	144	2015-03-23	175	31	1	7	1
1	3	5	flc2	2015-02-03	127	2015-03-09	161	34	1	7	1
1	3	6	EDI	2015-02-09	133	2015-03-16	168	35	1	5	0
1	3	7	NDX	2015-02-16	140	2015-03-23	175	35	1	10	2
1	3	8	COL	2015-02-04	128	2015-03-09	161	33	1	4	2
1	3	9	VIN3	2015-03-13	165	2015-04-10	193	28	1	5	0
1	3	10
1	3	11	VRN2	2015-03-18	170	2015-04-17	200	30	1	8	0
1	4	1	NDX	2015-02-16	140	2015-03-23	175	35	1	8	1
1	4	2	VAR	2015-02-18	142	2015-03-23	175	33	1	6	0
1	4	3	LOV	2015-02-18	142	2015-03-25	177	35	1	7	1
1	4	4	VRN1	2015-03-13	165	2015-04-13	196	31
1	4	5	EDIN	2015-02-16	140	2015-03-18	170	30	1	4	0
1	4	6
1	4	7
1	4	8	ULL	2015-02-18	142	2015-03-20	172	30	1	6	4
1	4	9	VRN2	2015-03-20	172	2015-04-17	200	28	1	5	1
1	4	10	COL	2015-02-04	128	2015-03-09	161	33	1	5	3
1	4	11	BRO	2015-02-25	149	2015-03-30	182	33	1	7	0
1	5	1	NIL1	2015-02-20	144	2015-04-07	190	46	6	8	0
1	5	2	VAR	2015-02-18	142	2015-03-16	168	26	1	3	0
1	5	3	FVE	2015-02-03	127	2015-03-18	170	43	2	7	1
1	5	4	FLD	2015-02-13	137	2015-03-16	168	31	1	8	1
1	5	5	EDI	2015-02-04	128	2015-03-16	168	40	1	6	0
1	5	6	flc2	2015-02-02	126	2015-03-09	161	35	1	7	1
1	5	7	SF2	2015-02-09	133	2015-03-16	168	35	1	6	0
1	5	8
1	5	9	COL	2015-02-09	133	2015-03-11	163	30	1	6	0
1	5	10
1	5	11	NIL2	2015-02-11	135	2015-03-16	168	33	1	6	1
1	6	1	FCA	2015-02-16	140	2015-03-23	175	35	1	8	0
1	6	2
1	6	3	NIL1	2015-02-18	142	2015-03-25	177	35	1	10	0
1	6	4	EDIN	2015-02-16	140	2015-03-20	172	32	1	6	2
1	6	5
1	6	6	VAR	2015-02-23	147	2015-03-27	179	32	1	5	1
1	6	7	VARN	2015-02-16	140	2015-03-18	170	30	1	4	2
1	6	8	VRN1	2015-03-16	168	2015-04-15	198	30	1	6	1
1	6	9	FLD	2015-02-13	137	2015-03-18	170	33	1	6	0
1	6	10	ULL	2015-02-23	147	2015-04-01	184	37	1	7	0
1	6	11	SF2	2015-02-09	133	2015-03-13	165	32	1	6	0
1	7	1	VRN2	2015-03-16	168	2015-04-27	210	42	1	7	3
1	7	2
1	7	3	COL	2015-01-30	123	2015-03-09	161	38	1	4	4
1	7	4
1	7	5	LOV	2015-02-18	142	2015-03-25	177	35	1	8	1
1	7	6	VAR	2015-02-25	149	2015-03-27	179	30	1	8	0
1	7	7
1	7	8	BRO	2015-02-23	147	2015-03-27	179	32	1	6	2
1	7	9	VARN	2015-02-06	130	2015-03-13	165	35	1	5	4
1	7	10	FCA	2015-02-16	140	2015-03-16	168	28	1	5	2
1	7	11	EDI	2015-02-18	142	2015-03-18	170	28	1	6	2
1	8	1	NIL2	2015-02-11	135	2015-04-03	186	51	1	7	2
1	8	2	BRO	2015-03-09	161	2015-04-03	186	25	1	9	0
1	8	3	SF2	2015-02-04	128	2015-03-16	168	40	1	6	1
1	8	4	FVE	2015-02-03	127	2015-03-16	168	41	1	4	1
1	8	5	VARN	2015-02-11	135	2015-03-16	168	33	1	6	2
1	8	6
1	8	7	ULL	2015-02-23	147	2015-04-07	190	43	1	7	2
1	8	8	FLD	2015-02-16	140	2015-03-23	175	35	1	6	0
1	8	9	FCA	2015-02-13	137	2015-03-11	163	26	1	5	1
1	8	10
1	8	11	COL	2015-02-09	133	2015-03-13	165	32	1	7	0
1	9	1	BRO	2015-03-13	165	2015-04-15	198	33	2	8	0
1	9	2	NIL2	2015-02-11	135	2015-03-16	168	33	1	6	2
1	9	3	NDX	2015-02-23	147	2015-03-23	175	28	1	6	2
1	9	4	FLD	2015-02-16	140	2015-03-18	170	30	1	8	0
1	9	5	VRN1	2015-03-13	165	2015-04-17	200	35	1	5	2
1	9	6	FVE	2015-02-04	128	2015-03-16	168	40	1	8	0
1	9	7
1	9	8	FCA	2015-02-09	133	2015-03-11	163	30	1	10	0
1	9	9	LOV	2015-02-18	142	2015-03-25	177	35	1	10	1
1	9	10	COL	2015-02-09	133	2015-03-11	163	30	1	5	3
1	9	11	VRN2	2015-04-10	193	2015-04-24	207	14	1	6	2
1	10	1	FLD	2015-03-09	161	2015-04-03	186	25	1	8	1
1	10	2	NDX	2015-03-04	156	2015-04-03	186	30	1	6	4
1	10	3	VRN1	2015-03-11	163	2015-04-13	196	33	1	5	0
1	10	4	NIL2	2015-02-09	133	2015-03-13	165	32	1	10	0
1	10	5	EDIN	2015-02-11	135	2015-03-16	168	33	1	5	1
1	10	6	ULL	2015-02-20	144	2015-03-25	177	33	1	3	3
1	10	7	NIL1	2015-02-09	133	2015-03-18	170	37	1	7	0
1	10	8	flc2	2015-02-04	128	2015-03-11	163	35	1	5	1
1	10	9	FVE	2015-02-11	135	2015-03-16	168	33	1	10	2
1	10	10	VIN3	2015-03-13	165	2015-04-03	186	21	1	10	0
1	10	11	SF2	2015-02-04	128	2015-03-18	170	42	1	7	2
1	11	1	NIL1	did not germ
1	11	2	VRN1	2015-03-16	168	2015-04-13	196	28	1	8	1
1	11	3	VRN2	2015-03-16	168	2015-04-17	200	32	1	7	0
1	11	4	LOV	2015-02-16	140	2015-03-23	175	35	1	5	2
1	11	5	VIN3	2015-03-13	165	2015-04-17	200	35	1	7	0
1	11	6
1	11	7	EDI	2015-02-11	135	2015-03-18	170	35	1	8	0
1	11	8	flc2	2015-02-04	128	2015-03-09	161	33	1	7	0
1	11	9	NDX	2015-02-23	147	2015-03-27	179	32	1	8	0
1	11	10	VAR	2015-02-23	147	2015-03-30	182	35	1	6	0
1	11	11	EDIN	2015-02-18	142	2015-03-23	175	33	1	6	0
1	12	1	VARN	2015-03-04	156	2015-04-07	190	34	2	10	0
1	12	2	flc2	2015-02-04	128	2015-03-13	165	37	1	7	1
1	12	3	EDIN	2015-02-20	144	2015-03-23	175	31	2	6	0
1	12	4	EDI	2015-02-11	135	2015-03-20	172	37	1	6	1
1	12	5	ULL	2015-02-20	144	2015-03-23	175	31	1	5	2
1	12	6	VIN3	2015-03-13	165	2015-04-13	196	31	4	5	6
1	12	7
1	12	8
1	12	9	SF2	2015-02-20	144	2015-03-18	170	26	1	6	0
1	12	10	NIL1	2015-02-16	140	2015-03-20	172	32	1	9	0
1	12	11	VAR	2015-02-18	142	2015-03-20	172	30	2	4	0
2	1	1	FLD	2015-02-23	147	2015-04-07	190	43	1	9	3
2	1	2	SF2	2015-02-11	135	2015-03-11	163	28	1	5	2
2	1	3	NIL2	2015-02-11	135	2015-03-11	163	28	1	5	1
2	1	4	flc2	2015-02-03	127	2015-03-09	161	34	1	5	2
2	1	5	VRN2	2015-03-20	172	2015-04-13	196	24	1	8	1
2	1	6	NDX	2015-02-20	144	2015-03-20	172	28	1	6	0
2	1	7	VARN	2015-02-11	135	2015-03-11	163	28	1	6	3
2	1	8	NIL1	2015-02-13	137	2015-03-13	165	28	1	6	3
2	1	9	COL	2015-01-30	123	2015-03-09	161	38	1	6	1
2	1	10	VAR	2015-02-13	137	2015-03-11	163	26	1	3	0
2	1	11	ULL	2015-02-18	142	2015-03-16	168	26	1	6	2
2	2	1	FLD	2015-02-18	142	2015-03-23	175	33	1	7	1
2	2	2	EDIN	2015-02-20	144	2015-03-16	168	24	1	6	0
2	2	3	NIL2	2015-02-13	137	2015-03-11	163	26	1	7	1
2	2	4	SF2	2015-02-06	130	2015-03-11	163	33	1	4	2
2	2	5	EDI	2015-02-18	142	2015-03-16	168	26	1	4	2
2	2	6	VRN1	2015-03-13	165	2015-04-10	193	28	1	4	1
2	2	7	VAR	2015-02-16	140	2015-03-13	165	25	1	5	0
2	2	8	NDX	2015-02-25	149	2015-03-25	177	28	1	5	3
2	2	9	BRO	2015-02-23	147	2015-03-23	175	28	1	8	1
2	2	10	NIL1	2015-02-16	140	2015-03-13	165	25	1	5	0
2	2	11
2	3	1	EDI	2015-02-13	137	2015-03-13	165	28	1	6	1
2	3	2	VAR	2015-02-09	133	2015-03-11	163	30	1	4	1
2	3	3	VIN3	2015-03-18	170	2015-04-13	196	26	1	5	2
2	3	4	BRO	2015-02-18	142	2015-03-20	172	30	1	7	1
2	3	5	EDIN	2015-02-16	140	2015-03-16	168	28	1	4	2
2	3	6	FLD	2015-02-16	140	2015-03-13	165	25	1	9	0
2	3	7	VARN	2015-02-16	140	2015-03-13	165	25	1	5	1
2	3	8	SF2	2015-02-13	137	2015-03-11	163	26	1	7	1
2	3	9	FVE	2015-02-06	130	2015-03-11	163	33	1	8	1
2	3	10
2	3	11	LOV	2015-02-16	140	2015-03-18	170	30	1	6	1
2	4	1	VRN1	2015-03-13	165	2015-04-15	198	33	1	8	1
2	4	2
2	4	3
2	4	4	EDI	2015-02-09	133	2015-03-13	165	32	1	7	0
2	4	5	EDIN	2015-02-11	135	2015-03-16	168	33	1	5	2
2	4	6	LOV	2015-02-20	144	2015-03-23	175	31	1	5	0
2	4	7	VIN3	2015-03-13	165	2015-04-10	193	28	1	6	5
2	4	8	BRO	2015-02-25	149	2015-03-25	177	28	2	7	0
2	4	9	FCA	2015-02-11	135	2015-03-09	161	26	1	6	0
2	4	10	FVE	2015-02-11	135	2015-03-11	163	28	1	7	1
2	4	11
2	5	1	COL	2015-02-03	127	2015-03-09	161	34	1	5	0
2	5	2	FCA	2015-02-06	130	2015-03-13	165	35	1	6	1
2	5	3	ULL	2015-02-11	135	2015-03-16	168	33	1	5	0
2	5	4
2	5	5	VARN	2015-02-13	137	2015-03-16	168	31	1	3	0
2	5	6	FVE	2015-02-06	130	2015-03-13	165	35	1	4	0
2	5	7	VRN2	2015-03-13	165	2015-04-13	196	31	1	0	2
2	5	8	VIN3	2015-03-13	165	2015-04-13	196	31	1	5	4
2	5	9	flc2	2015-02-04	128	2015-03-06	158	30	1	7	1
2	5	10
2	5	11	LOV	2015-02-18	142	2015-03-20	172	30	1	5	4
2	6	1	flc2	2015-02-09	133	2015-03-09	161	28	1	5	1
2	6	2
2	6	3	NDX	2015-02-23	147	2015-03-23	175	28	1	7	0
2	6	4	ULL	2015-02-18	142	2015-03-16	168	26	1	8	1
2	6	5
2	6	6	VRN2	2015-03-18	170	2015-04-13	196	26	1	4	0
2	6	7	COL	2015-02-09	133	2015-03-11	163	30	1	9	1
2	6	8	FCA	2015-02-13	137	2015-03-11	163	26	1	10	1
2	6	9	NIL2	2015-02-13	137	2015-03-11	163	26	1	5	1
2	6	10	NIL1	2015-02-11	135	2015-03-13	165	30	1	11	0
2	6	11	VRN1	2015-03-09	161	2015-04-07	190	29	1	8	0
2	7	1	flc2	2015-02-09	133	2015-03-09	161	28	2	4	0
2	7	2	VIN3	2015-03-16	168	2015-04-17	200	32	1	10	0
2	7	3	COL	2015-02-11	135	2015-03-09	161	26	1	6	0
2	7	4	SF2	2015-02-16	140	2015-03-09	161	21	3	9	0
2	7	5	NDX	2015-02-20	144	2015-03-20	172	28	1	9	0
2	7	6	LOV	2015-02-16	140	2015-03-23	175	35	1	4	2
2	7	7	NIL2	2015-02-11	135	2015-03-11	163	28	1	6	0
2	7	8	FVE	2015-02-03	127	2015-03-11	163	36	1	6	0
2	7	9	VRN1	2015-03-04	156	2015-04-03	186	30	1	6	1
2	7	10
2	7	11
2	8	1	NDX	2015-02-18	142	2015-03-23	175	33	1	5	0
2	8	2	BRO	2015-02-20	144	2015-03-20	172	28	1	8	0
2	8	3	VAR	2015-02-18	142	2015-03-16	168	26	1	7	0
2	8	4	NIL1	2015-02-11	135	2015-03-13	165	30	1	6	0
2	8	5	EDI	2015-02-11	135	2015-03-11	163	28	1	5	1
2	8	6	FVE	2015-02-06	130	2015-03-11	163	33	1	7	2
2	8	7	SF2	2015-02-11	135	2015-03-11	163	28	1	8	0
2	8	8	VRN2	2015-03-16	168	2015-04-13	196	28	1	7	1
2	8	9	FCA	2015-02-13	137	2015-03-11	163	26	1	6	0
2	8	10	flc2	2015-02-06	130	2015-03-06	158	28	1	5	0
2	8	11
2	9	1	EDI	2015-02-11	135	2015-03-11	163	28	1	9	0
2	9	2
2	9	3	FLD	2015-02-18	142	2015-03-16	168	26	1	8	0
2	9	4	flc2	2015-02-06	130	2015-03-09	161	31	1	5	1
2	9	5	SF2	2015-02-11	135	2015-03-11	163	28	1	4	1
2	9	6	EDIN	2015-02-16	140	2015-03-16	168	28	1	8	0
2	9	7	VIN3	2015-03-13	165	2015-04-10	193	28	1	9	1
2	9	8	NIL2	2015-02-13	137	2015-03-11	163	26	1	6	0
2	9	9	NIL1	2015-02-13	137	2015-03-13	165	28	1	9	0
2	9	10	LOV	2015-02-16	140	2015-03-18	170	30	1	6	0
2	9	11	VRN2	2015-03-09	161	2015-04-01	184	23	1	8	1
2	10	1	EDIN	2015-02-18	142	2015-03-16	168	26	1	6	0
2	10	2	NIL1	2015-02-16	140	2015-03-13	165	25	1	9	0
2	10	3	EDI	2015-02-18	142	2015-03-11	163	21	1	4	1
2	10	4	BRO	2015-02-18	142	2015-03-18	170	28	1	7	2
2	10	5
2	10	6	VAR	2015-02-18	142	2015-03-18	170	28	1	5	0
2	10	7	FCA	2015-02-13	137	2015-03-11	163	26	1	6	3
2	10	8	VRN2	2015-03-13	165	2015-04-10	193	28	1	5	2
2	10	9	VARN	2015-02-13	137	2015-03-11	163	26	1	7	1
2	10	10	ULL	2015-02-18	142	2015-03-18	170	28	1	5	2
2	10	11	FLD	2015-02-16	140	2015-03-13	165	25	1	7	0
2	11	1	NIL2	2015-02-11	135	2015-03-11	163	28	1	7	1
2	11	2	COL	2015-02-11	135	2015-03-09	161	26	1	5	0
2	11	3	VRN1	2015-03-13	165	2015-04-10	193	28	1	9	0
2	11	4	VIN3	2015-03-13	165	2015-04-13	196	31	1	8	0
2	11	5
2	11	6	FLD	2015-02-13	137	2015-03-13	165	28	1	7	2
2	11	7	EDIN	2015-02-20	144	2015-03-23	175	31	1	7	0
2	11	8	ULL	2015-02-20	144	2015-03-25	177	33	1	8	2
2	11	9
2	11	10	LOV	2015-02-20	144	2015-03-25	177	33	1	8	1
2	11	11	VARN	2015-02-13	137	2015-03-11	163	26	1	7	1
2	12	1
2	12	2	NDX	2015-02-25	149	2015-03-27	179	30	1	6	2
2	12	3	VRN1	2015-03-11	163	2015-04-10	193	30	1	7	0
2	12	4
2	12	5	FCA	2015-02-16	140	2015-03-13	165	25	1	7	0
2	12	6	BRO	2015-02-23	147	2015-03-25	177	30	1	9	0
2	12	7	ULL	2015-02-20	144	2015-03-16	168	24	1	7	1
2	12	8	VAR	2015-02-16	140	2015-03-16	168	28	1	6	0
2	12	9	FVE	2015-02-04	128	2015-03-13	165	37	1	5	0
2	12	10	VARN	2015-02-16	140	2015-03-13	165	25	1	6	0
2	12	11	COL	2015-01-30	123	2015-03-06	158	35	1	6	0
3	1	1	EDI	2015-02-23	147	2015-03-30	182	35	1	9	3
3	1	2	FLD	2015-02-18	142	2015-03-16	168	26	1	6	3
3	1	3	ULL	2015-02-18	142	2015-03-16	168	26	1	8	2
3	1	4
3	1	5	VRN2	2015-03-18	170	2015-04-17	200	30	1	8	1
3	1	6	VIN3	2015-03-13	165	2015-04-17	200	35	1	9	0
3	1	7
3	1	8	NDX	2015-02-23	147	2015-04-01	184	37	1	7	2
3	1	9	FVE	2015-02-16	140	2015-03-06	158	18	1	5	2
3	1	10
3	1	11	BRO	2015-03-02	154	2015-03-27	179	25	1	10	1
3	2	1
3	2	2	FVE	2015-02-06	130	2015-03-16	168	38	1	7	0
3	2	3	VARN	2015-02-13	137	2015-03-13	165	28	1	7	2
3	2	4	SF2	2015-02-11	135	2015-03-11	163	28	1	8	2
3	2	5	EDI	2015-02-13	137	2015-03-13	165	28	1	4	4
3	2	6
3	2	7
3	2	8	LOV	2015-02-20	144	2015-03-23	175	31	1	5	4
3	2	9	BRO	2015-02-20	144	2015-03-20	172	28	3	9	0
3	2	10	NIL2	2015-02-13	137	2015-03-13	165	28	1	9	1
3	2	11	VAR	2015-02-18	142	2015-03-16	168	26	1	7	1
3	3	1	VARN	2015-02-06	130	2015-03-13	165	35	1	2	5
3	3	2	BRO	2015-02-23	147	2015-03-20	172	25	2	8	0
3	3	3	EDIN	2015-02-25	149	2015-03-23	175	26	1	7	0
3	3	4	FVE	2015-02-09	133	2015-03-13	165	32	1	6	5
3	3	5
3	3	6	LOV	2015-02-20	144	2015-03-23	175	31	1	6	2
3	3	7	EDI	dead
3	3	8	COL	2015-02-06	130	2015-03-09	161	31	1	6	0
3	3	9
3	3	10	SF2	2015-02-13	137	2015-03-11	163	26	1	8	2
3	3	11	VRN2	2015-03-13	165	2015-04-13	196	31	1	7	3
3	4	1	FCA	2015-02-11	135	2015-03-11	163	28	1	6	0
3	4	2	flc2	2015-02-04	128	2015-03-09	161	33	1	7	1
3	4	3	EDIN	2015-02-23	147	2015-03-23	175	28	1	9	0
3	4	4	SF2	2015-02-11	135	2015-03-11	163	28	1	6	0
3	4	5	VRN1	2015-03-13	165	2015-04-10	193	28	1	7	2
3	4	6	LOV	2015-02-20	144	2015-03-23	175	31	1	4	4
3	4	7	NIL1	2015-02-11	135	2015-03-16	168	33	1	9	2
3	4	8	VARN	2015-02-18	142	2015-03-16	168	26	1	8	1
3	4	9	VAR	2015-02-18	142	2015-03-18	170	28	1	5	1
3	4	10	NIL2	2015-02-11	135	2015-03-13	165	30	1	7	2
3	4	11	COL	2015-02-03	127	2015-03-09	161	34	1	7	2
3	5	1	ULL	2015-02-16	140	2015-03-16	168	28	1	8	1
3	5	2	flc2	2015-02-13	137	2015-03-13	165	28	1	4	2
3	5	3	COL	2015-02-11	135	2015-03-11	163	28	1	5	1
3	5	4	VIN3	2015-03-16	168	2015-04-17	200	32	2	7	1
3	5	5	NIL1	2015-02-18	142	2015-03-18	170	28	1	12	0
3	5	6	VRN1	2015-03-11	163	2015-04-10	193	30	1	6	3
3	5	7	FCA	2015-02-11	135	2015-03-16	168	33	1	6	2
3	5	8	VRN2	2015-03-13	165	2015-04-10	193	28	1	6	3
3	5	9	FLD	2015-02-18	142	2015-03-16	168	26	1	8	0
3	5	10	EDIN	2015-02-20	144	2015-03-16	168	24	1	6	0
3	5	11	NDX	2015-02-11	135	2015-03-13	165	30	1	6	3
3	6	1	VIN3	2015-03-11	163	2015-04-07	190	27	1	11	0
3	6	2	NDX	2015-02-25	149	2015-03-25	177	28	1	10	2
3	6	3	ULL	2015-02-20	144	2015-03-18	170	26	1	7	0
3	6	4	NIL2	2015-02-11	135	2015-03-13	165	30	1	9	2
3	6	5	VAR	2015-02-18	142	2015-03-20	172	30	2	7	1
3	6	6	FCA	2015-02-16	140	2015-03-11	163	23	1	7	3
3	6	7	NIL1	2015-02-13	137	2015-03-16	168	31	1	9	3
3	6	8	FLD	2015-02-16	140	2015-03-13	165	25	6	2	1
3	6	9	VRN1	2015-03-04	156	2015-04-10	193	37	1	8	2
3	6	10
3	6	11	flc2	2015-02-09	133	2015-03-09	161	28	1	7	1
3	7	1	VIN3	2015-03-16	168	2015-04-15	198	30	1	8	0
3	7	2	VRN2	2015-03-13	165	2015-04-13	196	31	1	12	2
3	7	3	COL	2015-02-09	133	2015-03-09	161	28	1	8	2
3	7	4	SF2	2015-02-16	140	2015-03-11	163	23	1	8	2
3	7	5
3	7	6	FLD	2015-02-13	137	2015-03-13	165	28	1	9	0
3	7	7
3	7	8	VARN	2015-02-16	140	2015-03-13	165	25	1	7	0
3	7	9	NIL1	2015-02-16	140	2015-03-16	168	28	1	6	0
3	7	10	VRN1	2015-03-16	168	2015-04-13	196	28
3	7	11	EDIN	2015-02-13	137	2015-03-13	165	28	1	8	0
3	8	1	VAR	2015-02-20	144	2015-03-20	172	28	1	4	0
3	8	2	FLD	2015-02-18	142	2015-03-16	168	26	1	7	0
3	8	3	FVE	2015-02-09	133	2015-03-13	165	32	1	6	2
3	8	4	VIN3	2015-03-13	165	2015-04-14	197	32	1	7	3
3	8	5	COL	2015-02-11	135	2015-03-09	161	26	1	7	1
3	8	6	VARN	2015-02-16	140	2015-03-13	165	25	1	7	1
3	8	7	ULL	2015-02-20	144	2015-03-23	175	31	2	7	0
3	8	8	FCA	2015-02-16	140	2015-03-16	168	28	1	5	2
3	8	9	LOV	2015-02-20	144	2015-03-27	179	35	1	8	1
3	8	10	NIL1	2015-02-16	140	2015-03-16	168	28	1	7	2
3	8	11	EDI	2015-02-18	142	2015-03-20	172	30	1	10	0
3	9	1	NIL2	2015-02-11	135	2015-03-16	168	33	1	7	1
3	9	2	EDI	2015-02-20	144	2015-03-18	170	26	1	8	0
3	9	3	LOV	2015-02-20	144	2015-03-05	157	13	1	6	1
3	9	4	NDX	2015-01-28	121	2015-03-04	156	35	1	7	0
3	9	5
3	9	6	VAR	2015-02-18	142	2015-03-16	168	26	1	6	0
3	9	7	BRO	2015-02-25	149	2015-03-30	182	33	3	5	0
3	9	8	VIN3	2015-03-16	168	2015-04-17	200	32	1	8	0
3	9	9	EDIN	2015-02-18	142	2015-03-16	168	26	1	6	0
3	9	10	VRN1	2015-03-16	168	2015-04-17	200	32	1	10	0
3	9	11	NIL1	2015-02-16	140	2015-03-16	168	28	1	7	0
3	10	1	VAR	2015-02-20	144	2015-03-23	175	31	1	6	1
3	10	2	BRO	2015-02-25	149	2015-04-13	196	47	1	8	0
3	10	3	ULL	2015-02-18	142	2015-03-18	170	28	1	8	3
3	10	4	EDI	2015-02-18	142	2015-03-18	170	28	1	7	0
3	10	5	flc2	2015-02-13	137	2015-03-11	163	26	1	6	0
3	10	6
3	10	7	FCA	2015-02-11	135	2015-03-11	163	28	1	8	1
3	10	8	NDX	2015-02-13	137	2015-03-16	168	31	1	7	2
3	10	9	LOV	2015-02-18	142	2015-03-20	172	30	1	4	4
3	10	10	FVE	2015-02-03	127	2015-03-16	168	41	1	8	1
3	10	11	NIL2	2015-02-16	140	2015-03-13	165	25	1	9	1
3	11	1	SF2	2015-02-11	135	2015-03-11	163	28	1	6	0
3	11	2
3	11	3	NIL2	2015-02-13	137	2015-03-13	165	28	1	7	1
3	11	4	EDIN	2015-02-18	142	2015-03-13	165	23	1	6	0
3	11	5
3	11	6
3	11	7	NDX	2015-03-06	158	2015-04-03	186	28	1	6	0
3	11	8	BRO	2015-02-23	147	2015-04-03	186	39	6	9	0
3	11	9	VRN1	2015-03-13	165	2015-04-13	196	31	1	7	0
3	11	10	VRN2	2015-03-23	175	2015-04-20	203	28	1	6	3
3	11	11	flc2	2015-02-04	128	2015-03-09	161	33	1	7	0
3	12	1	VRN2	2015-03-18	170	2015-04-22	205	35	1	8	3
3	12	2	flc2	2015-02-03	127	2015-03-09	161	34	1	5	0
3	12	3	FLD	2015-02-20	144	2015-03-18	170	26	1	8	0
3	12	4
3	12	5	ULL	2015-03-09	161	2015-04-07	190	29	1	7	1
3	12	6	FCA	2015-02-18	142	2015-03-18	170	28	1	6	0
3	12	7	VARN	2015-02-18	142	2015-03-18	170	28	?1	?4	?1
3	12	8	COL	2015-02-13	137	2015-03-11	163	26	1	5	0
3	12	9	FVE	2015-02-04	128	2015-03-16	168	40	1	7	1
3	12	10	SF2	2015-02-09	133	2015-03-11	163	30	1	7	1
3	12	11
4	1	1	EDI	2015-02-13	137	2015-03-11	163	26	1	5	0
4	1	2
4	1	3	NIL1	2015-02-13	137	2015-03-13	165	28	1	9	0
4	1	4	COL	2015-01-30	123	2015-03-06	158	35	1	7	2
4	1	5	LOV	2015-02-18	142	2015-03-18	170	28	1	7	2
4	1	6	VRN2	2015-03-23	175	2015-04-13	196	21	1	7	0
4	1	7	VIN3	2015-03-16	168	2015-04-10	193	25	3	9	0
4	1	8
4	1	9	VRN1	2015-03-04	156	2015-04-10	193	37	1	10	0
4	1	10
4	1	11	EDIN	2015-02-11	135	2015-03-09	161	26	1	7	1
4	2	1	flc2	2015-02-04	128	2015-03-09	161	33	1	8	2
4	2	2
4	2	3	VRN2	2015-03-18	170	2015-04-13	196	26	1	7	0
4	2	4	FVE	2015-02-09	133	2015-03-11	163	30	1	8	1
4	2	5
4	2	6	EDIN	2015-02-13	137	2015-03-11	163	26	1	6	1
4	2	7	NIL2	2015-02-13	137	2015-03-13	165	28	1	6	2
4	2	8	COL	2015-02-06	130	2015-03-09	161	31	1	8	2
4	2	9	FLD	2015-02-06	130	2015-03-09	161	31	1	8	3
4	2	10	VARN	2015-02-11	135	2015-03-11	163	28	1	11	1
4	2	11	NDX	2015-02-16	140	2015-03-13	165	25	1	8	0
4	3	1
4	3	2	EDI	2015-02-16	140	2015-03-16	168	28	1	8	0
4	3	3	NDX	2015-02-23	147	2015-03-20	172	25	1	8	0
4	3	4	flc2	2015-02-11	135	2015-03-09	161	26	1	6	0
4	3	5	NIL1	2015-02-13	137	2015-03-13	165	28	1	6	4
4	3	6	FCA	2015-02-16	140	2015-03-13	165	25	1	7	3
4	3	7	VAR	2015-02-16	140	2015-03-16	168	28	1	6	0
4	3	8	VIN3	2015-03-04	156	2015-04-07	190	34	1	9	0
4	3	9
4	3	10	VRN1	2015-03-04	156	2015-04-03	186	30	1	7	0
4	3	11	LOV	2015-02-18	142	2015-03-20	172	30	1	6	1
4	4	1	VARN	2015-02-18	142	2015-03-16	168	26	1	5	1
4	4	2	ULL	2015-02-16	140	2015-03-16	168	28	1	5	6
4	4	3	NDX	2015-02-25	149	2015-03-23	175	26	1	8	2
4	4	4	FCA	2015-02-13	137	2015-03-13	165	28	1	6	2
4	4	5	BRO	2015-02-20	144	2015-03-20	172	28	1	7	1
4	4	6	SF2	2015-02-13	137	2015-03-11	163	26	1	6	0
4	4	7	NIL2	2015-02-13	137	2015-03-11	163	26	1	8	0
4	4	8	FLD	2015-02-16	140	2015-03-13	165	25	1	8	0
4	4	9	flc2	2015-02-09	133	2015-03-09	161	28	1	5	0
4	4	10	VAR	2015-02-18	142	2015-03-13	165	23	1	7	0
4	4	11	FVE	2015-01-30	123	2015-03-09	161	38	1	5	4
4	5	1	BRO	2015-02-20	144	2015-03-20	172	28	1	5	0
4	5	2	NIL1	2015-02-13	137	2015-03-13	165	28	1	5	3
4	5	3	VRN1	2015-03-09	161	2015-04-03	186	25	1	6	0
4	5	4
4	5	5	LOV	2015-02-18	142	2015-03-25	177	35	1	8	0
4	5	6	SF2	2015-02-11	135	2015-03-11	163	28	1	6	2
4	5	7	EDI	2015-02-16	140	2015-03-16	168	28	1	6	0
4	5	8	VAR	2015-02-18	142	2015-03-16	168	26	1	5	0
4	5	9	VIN3	2015-03-09	161	2015-04-01	184	23	1	6	0
4	5	10	ULL	2015-02-18	142	2015-03-16	168	26	1	5	3
4	5	11	FCA	2015-02-09	133	2015-03-09	161	28	1	8	1
4	6	1	SF2	2015-02-11	135	2015-03-09	161	26	1	6	0
4	6	2
4	6	3	FLD	2015-02-18	142	2015-03-16	168	26	1	5	3
4	6	4	VRN2	2015-03-13	165	2015-04-13	196	31	1	9	0
4	6	5	VARN	2015-02-11	135	2015-03-11	163	28	1	7	2
4	6	6	EDIN	2015-02-09	133	2015-03-09	161	28	1	4	0
4	6	7	FVE	2015-02-04	128	2015-03-11	163	35	1	6	4
4	6	8	NIL2	2015-02-06	130	2015-03-13	165	35	1	7	0
4	6	9	BRO	2015-02-20	144	2015-03-20	172	28	1	6	0
4	6	10	ULL	2015-02-18	142	2015-03-20	172	30	1	5	3
4	6	11	COL	2015-02-06	130	2015-03-09	161	31	1	5	1
4	7	1	VIN3	2015-03-20	172	2015-04-17	200	28	3	9	0
4	7	2	VRN1	2015-03-04	156	2015-04-07	190	34	1	5	0
4	7	3	NIL1	2015-02-13	137	2015-03-13	165	28	1	8	1
4	7	4	VAR	2015-02-06	130	2015-03-11	163	33	1	3	1
4	7	5	FCA	2015-02-06	130	2015-03-06	158	28	1	7	0
4	7	6	NIL2	2015-02-09	133	2015-03-11	163	30	1	5	0
4	7	7	LOV	2015-02-16	140	2015-03-16	168	28	1	5	3
4	7	8	SF2	2015-02-06	130	2015-03-13	165	35	1	6	0
4	7	9	COL	2015-02-06	130	2015-03-06	158	28	1	5	0
4	7	10	FLD	2015-02-13	137	2015-03-11	163	26	1	7	0
4	7	11
4	8	1	NIL1	2015-02-16	140	2015-03-20	172	32	1	6	2
4	8	2	ULL	2015-02-18	142	2015-03-18	170	28	1	2	6
4	8	3	VAR	2015-02-18	142	2015-03-16	168	26	1	6	0
4	8	4	LOV	2015-02-18	142	2015-03-23	175	33	1	5	4
4	8	5
4	8	6	EDIN	2015-02-11	135	2015-03-11	163	28	1	6	1
4	8	7	FLD	2015-02-13	137	2015-03-11	163	26	1	6	2
4	8	8	VRN2	2015-03-16	168	2015-04-15	198	30	1	5	0
4	8	9	NIL2	2015-02-11	135	2015-03-11	163	28	1	8	0
4	8	10	NDX	2015-02-18	142	2015-03-18	170	28	1	6	2
4	8	11	VARN	2015-02-11	135	2015-03-11	163	28	1	4	0
4	9	1	BRO	2015-02-20	144	2015-03-30	182	38	1	6	0
4	9	2
4	9	3	FLD	2015-02-16	140	2015-03-16	168	28	1	8	0
4	9	4	ULL	2015-02-18	142	2015-03-18	170	28	1	5	0
4	9	5
4	9	6	EDIN	2015-02-11	135	2015-03-11	163	28	1	5	0
4	9	7	VRN2	2015-03-11	163	2015-04-10	193	30	1	4	3
4	9	8	LOV	2015-02-18	142	2015-03-25	177	35	1	4	0
4	9	9	COL	2015-02-06	130	2015-03-09	161	31	1	6	1
4	9	10	VRN1	2015-03-04	156	2015-04-01	184	28	1	5	0
4	9	11	NIL2	2015-02-11	135	2015-03-11	163	28	1	5	0
4	10	1	FVE	2015-02-04	128	2015-03-18	170	42	1	6	0
4	10	2	ULL	2015-02-20	144	2015-03-30	182	38	1	6	3
4	10	3
4	10	4
4	10	5	VARN	2015-02-13	137	2015-03-11	163	26	1	8	1
4	10	6	BRO	2015-02-20	144	2015-03-20	172	28	1	7	0
4	10	7	EDI	2015-02-18	142	2015-03-16	168	26	1	6	2
4	10	8	VRN2	2015-03-13	165	2015-04-10	193	28	1	6	2
4	10	9	NDX	2015-02-16	140	2015-03-16	168	28	1	8	2
4	10	10	EDIN	2015-02-11	135	2015-03-11	163	28	1	5	0
4	10	11	flc2	2015-02-09	133	2015-03-09	161	28	1	6	0
4	11	1	VIN3	2015-03-13	165	2015-04-15	198	33	1	10	1
4	11	2	FCA	2015-02-13	137	2015-03-18	170	33	1	7	0
4	11	3
4	11	4	BRO	2015-02-23	147	2015-03-23	175	28	2	9	0
4	11	5	flc2	2015-02-09	133	2015-03-11	163	30	1	6	1
4	11	6
4	11	7	SF2	2015-02-11	135	2015-03-11	163	28	1	8	0
4	11	8	COL	2015-02-03	127	2015-03-06	158	31	1	6	1
4	11	9	FVE	2015-02-06	130	2015-03-13	165	35	1	5	4
4	11	10	VRN1	2015-03-04	156	2015-04-03	186	30	2	7	2
4	11	11	EDI	2015-02-11	135	2015-03-13	165	30	1	4	0
4	12	1
4	12	2	NDX	2015-02-23	147	2015-03-25	177	30	1	12	0
4	12	3	FVE	2015-02-09	133	2015-03-18	170	37	1	6	0
4	12	4	SF2	2015-02-13	137	2015-03-16	168	31	1	7	0
4	12	5	flc2	2015-02-06	130	2015-03-09	161	31	1	7	0
4	12	6	FCA	2015-02-18	142	2015-03-30	182	40	3	8	1
4	12	7	EDI	2015-02-11	135	2015-03-13	165	30	1	9	0
4	12	8	VIN3	2015-03-16	168	2015-04-17	200	32	1	0	6
4	12	9	VAR	2015-02-16	140	2015-03-16	168	28	1	6	0
4	12	10	VARN	2015-02-16	140	2015-03-11	163	23	1	7	3
4	12	11	NIL1	2015-02-13	137	2015-03-11	163	26	1	9	0
5	1	1	VARN	2015-02-23	147	2015-03-25	177	30	1	8	0
5	1	2	COL	2015-02-06	130	2015-03-09	161	31	4	5	0
5	1	3
5	1	4	FVE	2015-02-09	133	2015-03-13	165	32	1	6	0
5	1	5	NIL1	2015-02-18	142	2015-03-16	168	26	1	7	0
5	1	6	BRO	2015-02-23	147	2015-03-27	179	32	4	6	0
5	1	7	NDX	2015-02-25	149	2015-03-27	179	30	1	9	0
5	1	8	VRN2	2015-03-16	168	2015-04-17	200	32	2	7	0
5	1	9	VAR	2015-02-16	140	2015-03-13	165	25	2	2	0
5	1	10	FCA	2015-02-13	137	2015-03-11	163	26	2	5	0
5	1	11
5	2	1	VRN2	2015-03-27	179	2015-04-22	205	26	1	7	2
5	2	2	NDX	2015-02-23	147	2015-03-25	177	30	1	7	1
5	2	3	EDIN	2015-02-13	137	2015-03-09	161	24	1	8	0
5	2	4
5	2	5	COL	2015-02-09	133	2015-03-09	161	28	1	7	0
5	2	6	NIL1	2015-02-18	142	2015-03-16	168	26	1	7	1
5	2	7	LOV	2015-02-20	144	2015-03-25	177	33	1	9	0
5	2	8	VAR	2015-02-18	142	2015-03-16	168	26	1	4	0
5	2	9	NIL2	2015-02-16	140	2015-03-16	168	28	1	4	2
5	2	10
5	2	11	BRO	2015-02-23	147	2015-03-23	175	28	1	6	0
5	3	1	LOV	2015-02-20	144	2015-03-20	172	28	1	8	2
5	3	2	VARN	did not germ
5	3	3
5	3	4	VRN1	2015-03-13	165	2015-04-10	193	28	1	4	1
5	3	5
5	3	6	SF2	2015-02-13	137	2015-03-11	163	26	1	5	2
5	3	7	VRN2	2015-03-16	168	2015-04-13	196	28	1	7	0
5	3	8	ULL	2015-02-23	147	2015-03-23	175	28	1	5	2
5	3	9	NIL1	2015-02-16	140	2015-03-16	168	28	1	6	2
5	3	10	FLD	2015-02-16	140	2015-03-13	165	25	1	5	3
5	3	11	BRO	2015-02-23	147	2015-03-18	170	23	1	7	0
5	4	1	VIN3	2015-03-18	170	2015-04-17	200	30	1	11	1
5	4	2	ULL	2015-02-20	144	2015-03-20	172	28	1	4	3
5	4	3	EDI	2015-02-16	140	2015-03-16	168	28	1	4	2
5	4	4	EDIN	2015-02-16	140	2015-03-13	165	25	1	5	2
5	4	5	LOV	2015-02-20	144	2015-03-20	172	28	1	3	3
5	4	6	flc2	2015-02-11	135	2015-03-09	161	26	1	5	1
5	4	7	NIL2	2015-02-13	137	2015-03-13	165	28	1	6	1
5	4	8	SF2	2015-02-18	142	2015-03-16	168	26	1	4	1
5	4	9	VRN1	2015-03-04	156	2015-04-07	190	34	1	5	2
5	4	10
5	4	11	FLD	2015-02-18	142	2015-03-16	168	26	1	6	0
5	5	1	EDI	2015-02-18	142	2015-03-18	170	28	1	4	2
5	5	2	FLD	2015-02-16	140	2015-03-13	165	25	1	8	0
5	5	3	VRN1	2015-03-13	165	2015-04-13	196	31	1	5	3
5	5	4	FCA	2015-02-11	135	2015-03-09	161	26	1	6	0
5	5	5	VIN3	2015-03-13	165	2015-04-15	198	33	2	6	1
5	5	6	VARN	2015-02-16	140	2015-03-16	168	28	1	7	0
5	5	7
5	5	8	FVE	2015-02-04	128	2015-03-25	177	49	1	3	0
5	5	9	SF2	2015-02-13	137	2015-03-13	165	28	1	3	2
5	5	10	ULL	2015-02-18	142	2015-03-16	168	26	1	6	1
5	5	11	flc2	2015-02-11	135	2015-03-11	163	28	1	8	0
5	6	1	flc2	2015-02-13	137	2015-03-13	165	28	1	7	0
5	6	2	COL	2015-02-06	130	2015-03-09	161	31	1	6	1
5	6	3
5	6	4	VIN3	2015-03-16	168	2015-04-15	198	30	1	8	1
5	6	5	EDIN	2015-02-16	140	2015-03-13	165	25	2	8	1
5	6	6	FCA	2015-02-11	135	2015-03-13	165	30	1	7	1
5	6	7	NDX	2015-02-18	142	2015-03-18	170	28	1	6	1
5	6	8	VAR	2015-02-20	144	2015-03-16	168	24	1	6	0
5	6	9	FVE	2015-02-04	128	2015-03-13	165	37	1	4	2
5	6	10	NIL2	2015-02-13	137	2015-03-11	163	26	1	7	2
5	6	11	EDI	2015-02-11	135	2015-03-11	163	28	1	6	2
5	7	1	VAR	2015-02-20	144	2015-03-23	175	31	1	4	0
5	7	2	VARN	2015-02-16	140	2015-03-16	168	28	1	7	0
5	7	3	SF2	2015-02-16	140	2015-03-11	163	23	1	4	0
5	7	4	NDX	2015-02-18	142	2015-03-23	175	33	1	7	0
5	7	5	ULL	2015-02-23	147	2015-03-27	179	32	1	5	0
5	7	6	VIN3	2015-03-16	168	2015-04-17	200	32	1	8	1
5	7	7	NIL2	2015-02-06	130	2015-03-11	163	33	1	6	1
5	7	8	FVE	2015-02-16	140	2015-03-16	168	28	1	3	1
5	7	9	VRN2	2015-03-13	165	2015-04-13	196	31	1	4	1
5	7	10	COL	2015-02-11	135	2015-03-09	161	26	1	6	1
5	7	11	EDI	2015-02-16	140	2015-03-16	168	28	1	5	2
5	8	1	COL	2015-02-09	133	2015-03-11	163	30	1	6	0
5	8	2	LOV	2015-02-20	144	2015-03-23	175	31	1	6	1
5	8	3	EDIN	2015-02-11	135	2015-03-13	165	30	1	4	0
5	8	4
5	8	5
5	8	6	VIN3	2015-03-23	175	2015-04-17	200	25	1	4	0
5	8	7	VRN2	2015-03-18	170	2015-04-20	203	33	1	4	0
5	8	8	ULL	2015-02-18	142	2015-03-18	170	28	1	4	2
5	8	9	NDX	2015-02-23	147	2015-03-23	175	28	1	9	0
5	8	10	VRN1	2015-03-13	165	2015-04-10	193	28	1	3	0
5	8	11	FLD	2015-02-16	140	2015-03-16	168	28	1	7	0
5	9	1	EDI	2015-02-18	142	2015-03-16	168	26	1	7	2
5	9	2	VIN3	2015-03-13	165	2015-04-15	198	33	1	8	2
5	9	3	EDIN	2015-02-18	142	2015-03-23	175	33	1	5	0
5	9	4	BRO	2015-02-23	147	2015-03-11	163	16	1	5	0
5	9	5	NDX	2015-02-23	147	2015-03-13	165	18	1	6	1
5	9	6	LOV	2015-02-16	140	2015-03-13	165	25	1	5	0
5	9	7	FVE	2015-02-06	130	2015-03-20	172	42	1	5	1
5	9	8	ULL	2015-02-18	142	2015-03-11	163	21	1	5	1
5	9	9	flc2	2015-02-11	135	2015-04-10	193	58	1	3	1
5	9	10	NIL2	2015-02-13	137	2015-03-11	163	26	1	3	1
5	9	11
5	10	1	FLD	2015-02-18	142	2015-03-16	168	26	1	3	0
5	10	2	NIL1	2015-02-16	140	2015-03-16	168	28	1	5	3
5	10	3	BRO	2015-02-23	147	2015-03-23	175	28	1	5	2
5	10	4
5	10	5	EDIN	2015-02-11	135	2015-03-13	165	30	1	5	0
5	10	6
5	10	7	LOV	2015-02-20	144	2015-03-20	172	28	1	4	0
5	10	8	FCA	2015-02-13	137	2015-03-11	163	26	1	7	0
5	10	9	VRN1	2015-03-13	165	2015-04-10	193	28	1	6	1
5	10	10
5	10	11	flc2	2015-02-11	135	2015-03-09	161	26	1	7	0
5	11	1	NIL1	2015-02-16	140	2015-03-18	170	30	1	5	1
5	11	2	flc2	2015-02-11	135	2015-03-11	163	28	1	5	1
5	11	3	VARN	2015-02-13	137	2015-03-13	165	28	1	5	1
5	11	4	SF2	2015-02-11	135	2015-03-11	163	28	1	4	1
5	11	5	EDI	2015-02-13	137	2015-03-16	168	31	1	4	1
5	11	6
5	11	7	NIL2	2015-02-16	140	2015-03-13	165	25	1	5	1
5	11	8	FVE	2015-02-06	130	2015-03-13	165	35	1	4	0
5	11	9	BRO	2015-02-23	147	2015-03-23	175	28	1	6	0
5	11	10	FCA	2015-02-13	137	2015-03-11	163	26	1	5	0
5	11	11	VAR	2015-02-18	142	2015-03-16	168	26	1	3	0
5	12	1	VAR	2015-02-23	147	2015-03-25	177	30	1	4	0
5	12	2	SF2	2015-02-25	149	2015-03-18	170	21	1	3	0
5	12	3	FLD	2015-02-23	147	2015-03-23	175	28	1	4	0
5	12	4
5	12	5	NIL1	2015-02-20	144	2015-03-27	179	35	1	7	0
5	12	6	VRN2	2015-03-20	172	2015-04-20	203	31	1	9	1
5	12	7	FCA	2015-02-23	147	2015-03-30	182	35	1	5	1
5	12	8	VARN	2015-02-23	147	2015-04-03	186	39	1	5	0
5	12	9
5	12	10	VRN1	2015-03-13	165	2015-04-10	193	28	1	6	2
5	12	11	COL	2015-02-16	140	2015-03-23	175	35	2	7	0
6	1	1	EDIN	2015-02-11	135	2015-03-11	163	28	1	8	1
6	1	2	VIN3	2015-02-28	152	2015-04-03	186	34	1	9	2
6	1	3
6	1	4	VRN2	2015-03-13	165	2015-04-13	196	31	2	6	0
6	1	5	flc2	2015-02-04	128	2015-03-06	158	30	1	7	0
6	1	6	FLD	2015-02-16	140	2015-03-11	163	23	1	4	1
6	1	7	SF2	2015-02-11	135	2015-03-09	161	26	1	6	0
6	1	8
6	1	9	COL	did not germ
6	1	10	EDI	2015-02-13	137	2015-03-09	161	24	1	7	1
6	1	11	ULL	2015-02-16	140	2015-03-16	168	28	1	5	0
6	2	1	SF2	2015-02-11	135	2015-03-09	161	26	1	8	2
6	2	2
6	2	3	NIL1	2015-02-13	137	2015-03-11	163	26	1	7	4
6	2	4	VRN2	2015-03-16	168	2015-04-13	196	28	1	7	0
6	2	5	VAR	2015-02-18	142	2015-03-16	168	26	1	8	0
6	2	6	VIN3	2015-03-13	165	2015-04-10	193	28	2	6	1
6	2	7	FCA	2015-02-13	137	2015-03-09	161	24	2	9	9
6	2	8	LOV	did not germ
6	2	9
6	2	10	NDX	2015-02-18	142	2015-03-16	168	26	1	12	0
6	2	11	FVE	2015-02-04	128	2015-03-09	161	33	1	7	2
6	3	1	COL	2015-02-11	135	2015-03-09	161	26	1	9	0
6	3	2	VRN2	2015-03-18	170	2015-04-13	196	26	1	6	0
6	3	3	NDX	2015-02-27	151	2015-03-25	177	26	1	5	3
6	3	4	ULL	2015-02-18	142	2015-03-18	170	28	1	6	2
6	3	5	SF2	2015-02-06	130	2015-03-09	161	31	1	7	2
6	3	6
6	3	7	VRN1	2015-03-09	161	2015-04-03	186	25	2	6	0
6	3	8	VARN	2015-02-16	140	2015-03-13	165	25	1	4	1
6	3	9	VIN3	2015-03-11	163	2015-04-01	184	21	1	9	0
6	3	10	NIL2	2015-02-11	135	2015-03-11	163	28	1	6	3
6	3	11	flc2	2015-02-11	135	2015-03-09	161	26	1	6	2
6	4	1	NIL1	2015-02-13	137	2015-03-13	165	28	1	8	2
6	4	2	VRN1	2015-03-13	165	2015-04-13	196	31	1	6	0
6	4	3	FCA	2015-02-13	137	2015-03-11	163	26	1	8	0
6	4	4
6	4	5	LOV	2015-02-20	144	2015-03-18	170	26	1	3	0
6	4	6	NIL2	2015-02-11	135	2015-03-11	163	28	1	5	2
6	4	7	VAR	2015-02-20	144	2015-03-16	168	24	1	5	0
6	4	8	BRO	2015-02-18	142	2015-03-16	168	26	1	9	0
6	4	9	VARN	2015-02-11	135	2015-03-09	161	26	1	7	0
6	4	10	NDX	2015-02-16	140	2015-03-18	170	30	1	9	2
6	4	11	FVE	2015-02-04	128	2015-03-09	161	33	1	4	3
6	5	1	FLD	2015-02-23	147	2015-03-18	170	23	1	7	3
6	5	2	EDI	2015-02-18	142	2015-03-13	165	23	1	6	0
6	5	3	BRO	2015-02-20	144	2015-03-16	168	24	1	8	0
6	5	4	flc2	2015-02-16	140	2015-03-09	161	21	1	5	1
6	5	5	ULL	2015-02-18	142	2015-03-11	163	21	1	5	3
6	5	6	COL	2015-02-11	135	2015-03-06	158	23	1	6	3
6	5	7	VARN	2015-02-13	137	2015-03-11	163	26	1	5	2
6	5	8
6	5	9	EDIN	2015-02-11	135	2015-03-09	161	26	1	7	1
6	5	10	NIL2	2015-02-11	135	2015-03-11	163	28	1	6	2
6	5	11	VRN1	2015-02-25	149	2015-04-01	184	35	1	8	1
6	6	1	FCA	2015-02-20	144	2015-03-27	179	35	1	11	0
6	6	2	LOV	2015-02-18	142	2015-03-18	170	28	1	9	2
6	6	3
6	6	4	VAR	2015-02-18	142	2015-03-11	163	21	1	4	2
6	6	5	BRO	2015-02-23	147	2015-03-23	175	28	1	5	2
6	6	6	EDIN	2015-02-13	137	2015-03-11	163	26	1	3	0
6	6	7	FLD	2015-02-13	137	2015-03-13	165	28	1	4	0
6	6	8	NIL1	2015-02-13	137	2015-03-11	163	26	1	7	1
6	6	9	EDI	2015-02-13	137	2015-03-11	163	26	1	4	3
6	6	10	FVE	2015-02-04	128	2015-03-09	161	33	1	6	3
6	6	11
6	7	1	FLD	2015-02-20	144	2015-03-20	172	28	1	10	0
6	7	2	EDI	2015-02-16	140	2015-03-13	165	25	1	5	2
6	7	3	VIN3	2015-03-23	175	2015-04-15	198	23	3	7	0
6	7	4
6	7	5	BRO	2015-02-20	144	2015-03-16	168	24	2	9	0
6	7	6	VAR	2015-02-18	142	2015-03-13	165	23	1	5	0
6	7	7	NDX	2015-02-23	147	2015-03-23	175	28	1	8	0
6	7	8	EDIN	2015-02-11	135	2015-03-09	161	26	1	7	2
6	7	9	NIL2	2015-02-06	130	2015-03-09	161	31	1	4	2
6	7	10	VARN	2015-02-11	135	2015-03-09	161	26	1	7	2
6	7	11	NIL1	2015-02-11	135	2015-03-09	161	26	1	10	1
6	8	1	EDIN	2015-02-16	140	2015-03-11	163	23	1	7	3
6	8	2	VRN1	2015-03-13	165	2015-04-10	193	28	1	6	1
6	8	3	NDX	2015-02-20	144	2015-03-23	175	31	1	7	2
6	8	4	FCA	2015-02-04	128	2015-03-09	161	33	1	7	2
6	8	5	LOV	2015-02-20	144	2015-03-20	172	28	1	6	4
6	8	6	VIN3	2015-03-18	170	2015-04-17	200	30	2	6	2
6	8	7	VAR	2015-02-18	142	2015-03-11	163	21	1	5	0
6	8	8	ULL	2015-02-16	140	2015-03-13	165	25	1	5	4
6	8	9	COL	2015-02-04	128	2015-03-06	158	30	1	5	4
6	8	10	VARN	2015-02-11	135	2015-03-11	163	28	1	6	2
6	8	11	FVE	2015-02-04	128	2015-03-09	161	33	1	7	2
6	9	1	EDIN	2015-02-13	137	2015-03-16	168	31	1	4	0
6	9	2	VARN	2015-02-13	137	2015-03-11	163	26	1	6	4
6	9	3	COL	2015-01-30	123	2015-03-06	158	35	1	7	4
6	9	4	SF2	2015-02-04	128	2015-03-09	161	33	1	5	3
6	9	5	VIN3	2015-03-13	165	2015-04-13	196	31	1	6	4
6	9	6	NDX	2015-02-20	144	2015-03-20	172	28	1	5	2
6	9	7	VRN2	2015-03-18	170	2015-04-15	198	28	1	6	2
6	9	8
6	9	9	FLD	2015-02-13	137	2015-03-13	165	28	1	6	3
6	9	10	LOV	2015-02-20	144	2015-03-23	175	31	1	9	2
6	9	11	VRN1	2015-02-25	149	2015-03-30	182	33	1	5	0
6	10	1
6	10	2	FVE	2015-02-04	128	2015-03-11	163	35	1	7	3
6	10	3	flc2	2015-02-04	128	2015-03-09	161	33	1	6	0
6	10	4	LOV	2015-02-20	144	2015-03-23	175	31	1	7	0
6	10	5
6	10	6	ULL	2015-02-18	142	2015-03-20	172	30	1	5	0
6	10	7	VRN2	2015-03-18	170	2015-04-13	196	26	2	6	1
6	10	8	SF2	2015-02-11	135	2015-03-09	161	26	1	5	1
6	10	9	FCA	2015-02-11	135	2015-03-09	161	26	1	8	1
6	10	10	VRN1	2015-03-04	156	2015-04-01	184	28	2	6	0
6	10	11	COL	2015-02-04	128	2015-03-06	158	30	1	8	2
6	11	1	BRO	2015-02-23	147	2015-03-23	175	28	2	6	0
6	11	2	EDI	2015-02-18	142	2015-03-13	165	23	1	5	3
6	11	3	NIL2	2015-02-04	128	2015-03-11	163	35	1	7	2
6	11	4	VRN2	2015-03-18	170	2015-04-13	196	26	1	5	0
6	11	5	SF2	2015-02-13	137	2015-03-09	161	24	1	6	2
6	11	6	FLD	2015-02-16	140	2015-03-13	165	25	1	7	2
6	11	7	flc2	2015-02-09	133	2015-03-11	163	30	1	5	2
6	11	8	NIL1	2015-02-11	135	2015-03-11	163	28	1	6	1
6	11	9
6	11	10
6	11	11
6	12	1
6	12	2	VAR	2015-02-16	140	2015-03-18	170	30	1	5	1
6	12	3	NIL2	2015-02-09	133	2015-03-11	163	30	1	6	1
6	12	4	FCA	2015-02-09	133	2015-03-13	165	32	1	7	0
6	12	5
6	12	6	FVE	2015-02-06	130	2015-03-09	161	31	1	8	2
6	12	7	NIL1	2015-02-09	133	2015-03-11	163	30	1	9	0
6	12	8	EDI	2015-02-09	133	2015-03-11	163	30	1	6	0
6	12	9	BRO	2015-02-20	144	2015-03-16	168	24	1	8	0
6	12	10	ULL	2015-02-18	142	2015-03-13	165	23	1	6	1
6	12	11	flc2	2015-02-04	128	2015-03-06	158	30	1	7	1

## Sheet: North Sweden A 14-15 flowering
Genotype	Tray	Row	Position	Bud date	Days from sowing to budding	+3 cm stalk date	Days from sowing to +3 cm stalk	Flowering date	Days from sowing to open flowers	Days from budding to open flowers	Date of sowing
Bro 1-6	1	2	5	xxxxxxxxx	xxxxxxxxxxxxxxxxxxxxxxxxxx	xxxxxxxxxxxxxxxxxxxxxxxxxxxx	xxxxxxxxxxxxxxxxxxxxxxxxxxxx	xxxxxxxxxxxxxxxxxxxxxxxx	xxxxxxxxxxxxxxxxxxxxxxxxxxxxxx	xxxxxxxxxxxxxxxxxxxxxxxxxxxxxxx	2014-08-27		empty
Bro 1-6	1	2	10	2015-04-17	233	2015-05-02	248	2015-05-21	267	34		xxxxxxxx	dead
Bro 1-6	1	3	6	2015-04-20	236	2015-05-02	248	2015-05-21	267	31			"strange" leaves, "infected"(?), half dead or covered with organic matter from the beginning (just after snow)
Bro 1-6	1	4	5	2015-04-14	230	2015-05-02	248	2015-05-08	254	24			grazed or stalk broken
Bro 1-6	1	4	10	2015-04-17	233	2015-04-29	245	2015-05-08	254	21			grazed but only leaves
Bro 1-6	2	2	10	2015-04-14	230	2015-05-08	254	2015-05-08	254	24			+3 cm stalk or open flowers on 8 May (6 days after previous recording)
Bro 1-6	2	3	2	2015-04-17	233	2015-04-29	245	2015-05-08	254	21			+3 cm stalk or open flowers on 21 May (13 days after previous recording)
Bro 1-6	2	3	9	2015-04-14	230	2015-04-29	245	2015-05-08	254	24			not finished before 21 May
Bro 1-6	2	5	1	2015-04-11	227	2015-04-26	242	2015-04-29	245	18
Bro 1-6	3	1	8	2015-04-17	233	2015-05-08	254	2015-05-08	254	21
Bro 1-6	3	2	2	2015-04-17	233	2015-05-08	254	2015-05-21	267	34
Bro 1-6	3	2	10	2015-04-17	233	2015-05-02	248	2015-05-08	254	21
Bro 1-6	3	3	2	2015-04-23	239	2015-05-08	254	2015-05-21	267	28
Bro 1-6	3	4	5	2015-04-20	236	2015-05-08	254	2015-05-21	267	31
Bro 1-6	3	5	2	2015-04-14	230	2015-04-29	245	2015-05-08	254	24
Bro 1-6	3	6	4	2015-04-20	236	2015-05-08	254	2015-05-21	267	31
Bro 1-6	3	6	5	2015-04-17	233	2015-04-29	245	2015-05-08	254	21
Bro 1-6	3	6	10	2015-04-14	230	2015-04-23	239	2015-05-08	254	24
Bro 1-6	4	1	1	2015-04-14	230	2015-05-08	254	2015-05-21	267	37
Bro 1-6	4	2	3	2015-04-17	233	2015-04-29	245	2015-05-08	254	21
Bro 1-6	4	2	4	2015-04-11	227	2015-04-26	242	2015-04-29	245	18
Bro 1-6	4	3	1	2015-04-20	(236)	8 may (plant grazed)	(254)	21 may (plant grazed)	(267)	(31)
Bro 1-6	4	4	1	2015-04-17	233	leaves grazed & stalk broken
Bro 1-6	4	4	6	2015-04-17	233	2015-04-29	245	2015-05-08	254	21
Bro 1-6	4	5	1	2015-04-20	236	2015-05-08	254	2015-05-21	267	31
Bro 1-6	4	6	4	2015-04-20	236	2015-05-02	248	2015-05-21	267	31
Bro 1-6	5	1	1	2015-04-14	230	2015-05-02	248	2015-05-08	254	24
Bro 1-6	5	3	3	2015-04-23	239	2015-05-08	254	2015-05-21	267	28
Bro 1-6	5	4	1	2015-04-14	230	2015-04-29	245	2015-05-08	254	24
Bro 1-6	5	4	3	2015-04-17	233	2015-05-02	248	2015-05-21	267	34
Bro 1-6	5	6	3	2015-04-23	239	2015-05-08	254	2015-05-21	267	28
Bro 1-6	5	6	7	2015-04-20	236	2015-05-02	248	2015-05-08	254	18
Bro 1-6	6	1	8	2015-04-20	236	2015-05-02	248	2015-05-08	254	18
Bro 1-6	6	2	8	2015-04-20	236	2015-05-08	254	2015-05-21	267	31
Bro 1-6	6	4	2	2015-04-17	233	2015-05-21	267	2015-05-21	267	34
Bro 1-6	6	4	6	2015-04-20	236	2015-05-08	254	2015-05-21	267	31
Col FRI(sf2)	1	1	1	2015-04-08	224	8 may (bud grazed)	(254)	21 may (bud grazed)	(267)	(43)
Col FRI(sf2)	1	1	3	2015-04-08	224	2015-04-23	239	2015-04-29	245	21
Col FRI(sf2)	1	1	11	2015-04-11	227	2015-04-23	239	2015-04-26	242	15
Col FRI(sf2)	1	4	2	2015-04-08	224	2015-04-23	239	2015-04-29	245	21
Col FRI(sf2)	1	6	3	2015-04-08	224	2015-04-23	239	2015-04-26	242	18
Col FRI(sf2)	2	3	1	2015-04-05	221	2015-04-20	236	2015-04-23	239	18
Col FRI(sf2)	2	6	3	2015-04-08	224	2015-04-23	239	2015-04-23	239	15
Col FRI(sf2)	2	6	7	2015-04-20	236	2015-05-02	248	2015-05-21	267	31
Col FRI(sf2)	3	1	7	2015-04-20	236	2015-05-08	254	2015-05-21	267	31
Col FRI(sf2)	3	2	8	2015-04-08	224	2015-04-23	239	2015-05-08	254	30
Col FRI(sf2)	3	3	10	2015-04-11	227	2015-04-23	239	stalk grazed
Col FRI(sf2)	3	4	7	xxxxxxxxx	xxxxxxxxxxxxxxxxxxxxxxxxxx	xxxxxxxxxxxxxxxxxxxxxxxxxxxx	xxxxxxxxxxxxxxxxxxxxxxxxxxxx	xxxxxxxxxxxxxxxxxxxxxxxx	xxxxxxxxxxxxxxxxxxxxxxxxxxxxxx	xxxxxxxxxxxxxxxxxxxxxxxxxxxxxxx
Col FRI(sf2)	3	6	9	2015-04-08	224	2015-04-23	239	2015-04-26	242	18
Col FRI(sf2)	4	1	2	2015-04-08	224	2015-04-23	239	2015-05-02	248	24
Col FRI(sf2)	4	1	5	2015-04-08	224	2015-04-23	239	2015-04-29	245	21
Col FRI(sf2)	4	1	8	2015-04-08	224	2015-04-23	239	2015-04-26	242	18
Col FRI(sf2)	4	2	11	2015-04-08	224	2015-04-23	239	2015-05-02	248	24
Col FRI(sf2)	4	3	2	2015-04-11	227	2015-04-26	242	2015-05-02	248	21
Col FRI(sf2)	4	3	11	2015-04-08	224	2015-04-23	239	2015-04-26	242	18
Col FRI(sf2)	4	4	5	2015-04-23	239	2015-05-02	248	2015-05-21	267	28
Col FRI(sf2)	4	4	9	2015-04-08	224	2015-04-23	239	2015-04-29	245	21
Col FRI(sf2)	5	3	11	2015-04-20	236	2015-05-21	267	2015-05-02	248	12
Col FRI(sf2)	5	4	4	2015-04-26	242	2015-05-21	267	2015-05-21	267	25
Col FRI(sf2)	5	4	7	2015-04-23	239	2015-05-21	267	2015-05-21	267	28
Col FRI(sf2)	5	5	5	2015-04-11	227	2015-04-26	242	2015-05-02	248	21
Col FRI(sf2)	5	5	8	2015-04-23	239	2015-05-21	267	2015-05-21	267	28
Col FRI(sf2)	5	5	9	2015-04-20	236	2015-05-08	254	2015-05-21	267	31
Col FRI(sf2)	5	6	2	2015-04-11	227	2015-04-26	242	2015-04-26	242	15
Col FRI(sf2)	5	6	8	2015-04-26	242	2015-05-08	254	2015-05-21	267	25
Col FRI(sf2)	6	1	1	2015-05-02	248	2015-05-08	254	2015-05-21	267	19
Col FRI(sf2)	6	1	7	2015-04-11	227	2015-04-26	242	2015-05-08	254	27
Col FRI(sf2)	6	2	4	2015-04-17	233	2015-05-08	254	2015-05-21	267	34
Col FRI(sf2)	6	5	4	2015-04-08	224	2015-04-23	239	2015-04-29	245	21
Col FRI(sf2)	6	5	8	2015-04-11	227	2015-04-23	239	2015-04-29	245	18
Col FRI(sf2)	6	5	10	2015-04-17	233	2015-05-08	254	2015-05-08	254	21
Col FRI(sf2)	6	6	2	2015-04-08	224	2015-04-20	236	2015-04-26	242	18
Col-O	1	1	7	2015-04-08	224	2015-04-20	236	2015-04-23	239	15
Col-O	1	1	9	2015-04-05	221	2015-04-20	236	2015-04-20	236	15
Col-O	1	2	3	2015-04-11	227	2015-05-08	254	2015-05-08	254	27
Col-O	1	2	4	2015-04-05	221	2015-04-17	233	2015-04-17	233	12
Col-O	1	5	10	2015-04-05	221	2015-04-14	230	2015-04-11	227	6
Col-O	2	1	2	2015-04-05	221	2015-04-20	236	2015-04-14	230	9
Col-O	2	1	3	2015-04-05	221	2015-04-20	236	2015-04-11	227	6
Col-O	2	1	7	2015-04-05	221	2015-04-20	236	2015-04-17	233	12
Col-O	2	2	1	2015-04-05	221	2015-04-14	230	2015-04-08	224	3
Col-O	2	2	4	2015-04-05	221	2015-04-20	236	2015-04-08	224	3
Col-O	2	2	6	2015-04-05	221	2015-04-11	227	2015-04-08	224	3
Col-O	2	2	7	2015-04-05	221	2015-04-14	230	2015-04-08	224	3
Col-O	2	4	9	2015-04-05	221	2015-04-20	236	2015-04-08	224	3
Col-O	2	6	5	2015-04-05	221	2015-04-17	233	2015-04-17	233	12
Col-O	3	1	9	2015-04-05	221	2015-04-23	239	2015-04-26	242	21
Col-O	3	2	3	2015-04-08	224	2015-04-23	239	2015-05-08	254	30
Col-O	3	2	11	2015-04-05	221	2015-04-17	233	2015-04-08	224	3
Col-O	3	4	1	2015-04-05	221	2015-04-20	236	2015-04-08	224	3
Col-O	3	4	11	2015-04-05	221	2015-04-14	230	2015-04-08	224	3
Col-O	3	6	3	2015-04-05	221	2015-04-17	233	2015-04-14	230	9
Col-O	4	1	3	2015-04-05	221	2 may (stalks grazed)	(248)	21 may (stalks grazed)	(267)	(46)
Col-O	4	1	4	2015-04-05	221	2015-04-11	227	2015-04-08	224	3
Col-O	4	1	9	2015-04-05	221	2015-04-11	227	2015-04-08	224	3
Col-O	4	1	10	2015-04-05	221	2015-04-17	233	2015-04-08	224	3
Col-O	4	1	11	2015-04-05	221	2015-04-17	233	2015-04-08	224	3
Col-O	5	1	7	2015-04-05	221	2015-04-20	236	2015-04-17	233	12
Col-O	5	2	7	2015-04-05	221	2015-04-23	239	2015-04-17	233	12
Col-O	5	2	8	2015-04-05	221	2015-04-20	236	2015-04-20	236	15
Col-O	5	3	2	2015-04-05	221	2015-04-17	233	2015-04-14	230	9
Col-O	5	3	7	2015-04-11	227	2015-04-26	242	2015-05-02	248	21
Col-O	5	4	9	2015-04-14	230	2015-04-26	242	2015-05-08	254	24
Col-O	6	2	1	2015-04-05	221	2015-04-17	233	2015-04-20	236	15
Col-O	6	2	6	2015-04-05	221	20 april new (old stalk broken)	(236)	2015-04-08	224	3
Col-O	6	2	10	2015-04-05	221	2015-04-20	236	2015-04-08	224	3
Col-O	6	3	5	2015-04-05	221	2015-04-17	233	2015-04-20	236	15
Col-O	6	3	8	2015-04-05	221	2015-04-20	236	2015-04-14	230	9
Edi-O	1	1	8	xxxxxxxxx	xxxxxxxxxxxxxxxxxxxxxxxxxx	xxxxxxxxxxxxxxxxxxxxxxxxxxxx	xxxxxxxxxxxxxxxxxxxxxxxxxxxx	xxxxxxxxxxxxxxxxxxxxxxxx	xxxxxxxxxxxxxxxxxxxxxxxxxxxxxx	xxxxxxxxxxxxxxxxxxxxxxxxxxxxxxx
Edi-O	1	1	10	2015-04-11	227	2015-04-26	242	2015-04-29	245	18
Edi-O	1	2	1	2015-04-11	227	21 may (bud grazed)	(267)	21 may (bud grazed)	(267)	(40)
Edi-O	1	3	5	2015-04-14	230	2015-05-08	254	2015-05-08	254	24
Edi-O	1	3	9	2015-04-11	227	2015-04-29	245	2015-05-02	248	21
Edi-O	1	4	9	2015-04-14	230	2015-04-29	245	2015-05-08	254	24
Edi-O	1	6	1	2015-04-14	230	2015-05-08	254	2015-05-08	254	24
Edi-O	2	1	10	2015-04-11	227	2015-04-29	245	2015-05-02	248	21
Edi-O	2	1	11	2015-04-11	227	2015-04-29	245	2015-05-02	248	21
Edi-O	2	4	5	2015-04-11	227	2015-04-23	239	2015-04-29	245	18
Edi-O	2	4	6	2015-04-11	227	stalk grazed
Edi-O	3	1	1	2015-04-11	227	2015-04-26	242	2015-05-02	248	21
Edi-O	3	1	5	2015-04-11	227	2015-05-02	248	2015-05-08	254	27
Edi-O	3	1	6	2015-04-11	227	2015-04-29	245	2015-05-08	254	27
Edi-O	3	2	7	2015-04-14	230	2015-05-21	267	2015-05-21	267	37
Edi-O	3	2	9	2015-04-11	227	2015-04-23	239	2015-04-29	245	18
Edi-O	3	3	3	2015-04-11	227	2015-04-29	245	2015-05-02	248	21
Edi-O	3	4	9	2015-04-14	230	2015-05-02	248	2015-05-08	254	24
Edi-O	3	4	10	2015-04-11	227	2015-05-02	248	2015-05-08	254	27
Edi-O	3	5	3	2015-04-11	227	2015-04-29	245	2015-05-08	254	27
Edi-O	3	5	4	2015-04-11	227	2015-04-26	242	2015-04-26	242	15
Edi-O	3	5	7	2015-04-14	230	21 may (1st stalk broken)	(267)	21 may (1st stalk broken)	(267)	(37)
Edi-O	4	3	6	2015-04-11	227	2015-04-29	245	2015-05-08	254	27
Edi-O	4	5	10	2015-04-11	227	2015-04-26	242	2015-04-29	245	18
Edi-O	4	6	3	2015-04-11	227	2015-05-02	248	2015-05-02	248	21
Edi-O	5	1	6	2015-04-11	227	2015-04-29	245	2015-04-29	245	18
Edi-O	5	2	10	2015-04-14	230	2015-04-29	245	2015-05-08	254	24
Edi-O	5	4	10	2015-04-14	230	2015-05-08	254	2015-05-08	254	24
Edi-O	5	5	2	2015-04-08	224	2015-04-23	239	2015-04-23	239	15
Edi-O	5	5	6	2015-04-14	230	2015-05-02	248	2015-05-02	248	18
Edi-O	6	2	5	2015-04-14	230	2015-04-29	245	2015-05-08	254	24
Edi-O	6	2	7	2015-04-17	233	2015-05-08	254	2015-05-21	267	34
Edi-O	6	2	9	2015-04-14	230	2015-05-08	254	2015-05-08	254	24
Edi-O	6	3	3	2015-04-14	230	2015-05-02	248	2015-05-08	254	24
Edi-O	6	4	11	2015-04-11	227	2015-04-29	245	2015-05-02	248	21
Edi-O	6	6	6	2015-04-11	227	2015-04-26	242	2015-04-29	245	18
Lov-1	1	2	11	2015-04-11	227	2015-04-23	239	2015-05-02	248	21
Lov-1	1	3	2	2015-04-11	227	2015-04-29	245	2015-05-02	248	21
Lov-1	1	3	7	2015-04-11	227	2015-04-26	242	2015-05-02	248	21
Lov-1	1	5	5	2015-04-08	224	2015-04-23	239	2015-04-29	245	21
Lov-1	1	5	7	2015-04-11	227	2015-04-26	242	2015-05-08	254	27
Lov-1	1	6	7	2015-04-11	227	2015-04-26	242	2015-05-02	248	21
Lov-1	2	1	4	2015-04-11	227	stalk grazed
Lov-1	2	3	6	2015-04-08	224	stalk grazed
Lov-1	2	3	11	2015-04-11	227	2015-04-23	239	2015-04-29	245	18
Lov-1	2	4	2	2015-04-11	227	2015-04-23	239	2015-04-29	245	18
Lov-1	2	4	3	2015-04-11	227	2015-04-23	239	2015-04-29	245	18
Lov-1	2	4	10	2015-04-11	227	stalk grazed
Lov-1	2	5	2	2015-04-11	227	2015-04-23	239	2015-04-29	245	18
Lov-1	2	5	6	2015-04-08	224	2015-04-23	239	2015-05-02	248	24
Lov-1	3	1	10	2015-04-08	224	2015-04-26	242	2015-05-08	254	30
Lov-1	3	2	4	2015-04-11	227	2015-04-29	245	2015-05-08	254	27
Lov-1	3	3	4	2015-04-11	227	2015-04-29	245	2015-05-08	254	27
Lov-1	3	6	11	2015-04-11	227	2015-04-23	239	2015-05-08	254	27
Lov-1	4	2	6	xxxxxxxxx	xxxxxxxxxxxxxxxxxxxxxxxxxx	xxxxxxxxxxxxxxxxxxxxxxxxxxxx	xxxxxxxxxxxxxxxxxxxxxxxxxxxx	xxxxxxxxxxxxxxxxxxxxxxxx	xxxxxxxxxxxxxxxxxxxxxxxxxxxxxx	xxxxxxxxxxxxxxxxxxxxxxxxxxxxxxx
Lov-1	4	2	7	2015-04-08	224	2015-04-23	239	2015-05-02	248	24
Lov-1	4	3	3	2015-04-08	224	2015-04-26	242	2015-04-29	245	21
Lov-1	4	4	11	2015-04-11	227	2015-05-21	267	2015-05-02	248	21
Lov-1	4	6	10	2015-04-11	227	2015-04-26	242	2015-05-08	254	27
Lov-1	5	1	3	2015-04-08	224	2015-04-23	239	2015-05-02	248	24
Lov-1	5	3	4	2015-04-11	227	2015-04-26	242	2015-05-08	254	27
Lov-1	5	5	1	2015-04-11	227	2015-04-26	242	2015-05-02	248	21
Lov-1	5	6	10	2015-04-11	227	2015-04-26	242	2015-05-02	248	21
Lov-1	6	1	6	2015-04-11	227	2015-04-26	242	2015-05-02	248	21
Lov-1	6	2	3	2015-04-14	230	2015-05-02	248	2015-05-08	254	24
Lov-1	6	2	11	2015-04-14	230	2015-04-29	245	2015-05-08	254	24
Lov-1	6	4	4	2015-04-11	227	2015-04-26	242	2015-05-02	248	21
Lov-1	6	4	8	2015-04-26	242	2015-05-21	267	2015-05-21	267	25
Lov-1	6	4	9	2015-04-11	227	2015-04-29	245	2015-05-08	254	27
Lov-1	6	5	3	2015-04-08	224	2015-04-23	239	2015-04-29	245	21
Lov-1	6	5	9	2015-04-14	230	2015-05-02	248	2015-05-08	254	24
Lov-1	6	5	11	2015-04-11	227	2015-04-26	242	2015-05-08	254	27
NIL1 (LovA)	1	2	6	2015-04-26	242	2015-05-08	254	2015-05-21	267	25
NIL1 (LovA)	1	2	8	xxxxxxxxx	xxxxxxxxxxxxxxxxxxxxxxxxxx	xxxxxxxxxxxxxxxxxxxxxxxxxxxx	xxxxxxxxxxxxxxxxxxxxxxxxxxxx	xxxxxxxxxxxxxxxxxxxxxxxx	xxxxxxxxxxxxxxxxxxxxxxxxxxxxxx	xxxxxxxxxxxxxxxxxxxxxxxxxxxxxxx
NIL1 (LovA)	1	5	2	2015-04-08	224	2015-04-23	239	2015-04-26	242	18
NIL1 (LovA)	1	6	4	2015-04-11	227	2015-04-23	239	2015-05-02	248	21
NIL1 (LovA)	1	6	8	2015-04-08	224	2015-04-23	239	2015-04-26	242	18
NIL1 (LovA)	2	1	5	2015-04-08	224	2015-04-23	239	2015-04-29	245	21
NIL1 (LovA)	2	2	2	2015-04-08	224	2015-04-23	239	2015-04-29	245	21
NIL1 (LovA)	2	2	3	2015-04-08	224	stalk grazed
NIL1 (LovA)	2	2	9	2015-04-05	221	2015-05-08	254	2015-04-29	245	24
NIL1 (LovA)	2	5	4	2015-04-08	224	2015-04-23	239	2015-04-29	245	21
NIL1 (LovA)	2	6	1	2015-04-11	227	2015-04-23	239	2015-05-02	248	21
NIL1 (LovA)	2	6	2	2015-04-11	227	2015-04-23	239	2015-04-29	245	18
NIL1 (LovA)	2	6	4	2015-04-11	227	2015-04-23	239	2015-05-02	248	21
NIL1 (LovA)	2	6	6	2015-04-11	227	2015-04-23	239	2015-04-26	242	15
NIL1 (LovA)	2	6	11	2015-04-14	230	2015-05-02	248	2015-05-21	267	37
NIL1 (LovA)	3	1	2	xxxxxxxxx	xxxxxxxxxxxxxxxxxxxxxxxxxx	xxxxxxxxxxxxxxxxxxxxxxxxxxxx	xxxxxxxxxxxxxxxxxxxxxxxxxxxx	xxxxxxxxxxxxxxxxxxxxxxxx	xxxxxxxxxxxxxxxxxxxxxxxxxxxxxx	xxxxxxxxxxxxxxxxxxxxxxxxxxxxxxx
NIL1 (LovA)	3	1	3	2015-04-11	227	2015-04-29	245	2015-05-21	267	40
NIL1 (LovA)	3	3	5	2015-04-08	224	2015-04-26	242	2015-05-08	254	30
NIL1 (LovA)	3	3	9	2015-04-14	230	2015-04-29	245	stalk grazed
NIL1 (LovA)	3	6	2	2015-04-14	230	2015-04-29	245	2015-05-08	254	24
NIL1 (LovA)	4	2	9	2015-04-08	224	2015-04-23	239	2015-04-29	245	21
NIL1 (LovA)	4	2	10	2015-04-08	224	2015-04-23	239	2015-04-29	245	21
NIL1 (LovA)	4	3	8	2015-04-11	227	2015-04-29	245	2015-05-08	254	27
NIL1 (LovA)	4	5	6	2015-04-11	227	2015-04-26	242	2015-05-08	254	27
NIL1 (LovA)	4	5	9	2015-04-11	227	2015-04-26	242	2015-05-02	248	21
NIL1 (LovA)	4	6	5	2015-04-08	224	2015-04-23	239	2015-04-29	245	21
NIL1 (LovA)	5	1	5	2015-04-08	224	2015-04-26	242	2015-05-02	248	24
NIL1 (LovA)	5	2	1	2015-04-11	227	2015-05-02	248	2015-05-08	254	27
NIL1 (LovA)	5	4	8	2015-04-26	242	2015-05-21	267	2015-05-21	267	25
NIL1 (LovA)	5	5	11	2015-04-14	230	2015-04-29	245	2015-05-08	254	24
NIL1 (LovA)	5	6	4	2015-04-11	227	2015-04-26	242	2015-05-08	254	27
NIL1 (LovA)	6	1	9	xxxxxxxxx	xxxxxxxxxxxxxxxxxxxxxxxxxx	xxxxxxxxxxxxxxxxxxxxxxxxxxxx	xxxxxxxxxxxxxxxxxxxxxxxxxxxx	xxxxxxxxxxxxxxxxxxxxxxxx	xxxxxxxxxxxxxxxxxxxxxxxxxxxxxx	xxxxxxxxxxxxxxxxxxxxxxxxxxxxxxx
NIL1 (LovA)	6	3	1	2015-04-14	230	2015-04-29	245	2015-05-08	254	24
NIL1 (LovA)	6	4	1	2015-04-14	230	2015-05-02	248	2015-05-21	267	37
NIL1 (LovA)	6	4	3	2015-04-23	239	2015-05-08	254	2015-05-21	267	28
NIL1 (LovA)	6	4	10	2015-04-20	236	2015-05-08	254	2015-05-21	267	31
NIL2 (Lov intro)	1	1	6	2015-04-11	227	2015-04-26	242	2015-05-02	248	21
NIL2 (Lov intro)	1	2	2	2015-04-11	227	2015-04-23	239	2015-05-02	248	21
NIL2 (Lov intro)	1	2	7	2015-04-20	236	2015-05-08	254	2015-05-21	267	31
NIL2 (Lov intro)	1	3	3	2015-04-11	227	2015-04-26	242	2015-05-02	248	21
NIL2 (Lov intro)	1	3	4	2015-04-11	227	2015-04-23	239	2015-04-29	245	18
NIL2 (Lov intro)	1	3	11	2015-04-08	224	8 may (1st stalk grazed)	(254)	21 may (1st stalk grazed)	(267)	(43)
NIL2 (Lov intro)	1	4	4	2015-04-08	224	2015-04-23	239	2015-04-26	242	18
NIL2 (Lov intro)	1	4	6	2015-04-08	224	2015-04-23	239	2015-04-29	245	21
NIL2 (Lov intro)	1	4	11	2015-04-11	227	8 may (1st stalk grazed)	(254)	21 may (1st stalk grazed)	(267)	(40)
NIL2 (Lov intro)	1	5	1	2015-04-08	224	2015-04-23	239	2015-04-26	242	18
NIL2 (Lov intro)	1	5	4	2015-04-08	224	2015-04-23	239	2015-04-29	245	21
NIL2 (Lov intro)	2	1	8	2015-04-08	224	2015-04-23	239	2015-04-29	245	21
NIL2 (Lov intro)	2	4	4	2015-04-08	224	2015-04-23	239	2015-04-26	242	18
NIL2 (Lov intro)	2	4	7	2015-04-11	227	2015-04-26	242	2015-05-08	254	27
NIL2 (Lov intro)	2	5	7	2015-04-08	224	2015-04-23	239	2015-04-29	245	21
NIL2 (Lov intro)	2	6	9	xxxxxxxxx	xxxxxxxxxxxxxxxxxxxxxxxxxx	xxxxxxxxxxxxxxxxxxxxxxxxxxxx	xxxxxxxxxxxxxxxxxxxxxxxxxxxx	xxxxxxxxxxxxxxxxxxxxxxxx	xxxxxxxxxxxxxxxxxxxxxxxxxxxxxx	xxxxxxxxxxxxxxxxxxxxxxxxxxxxxxx
NIL2 (Lov intro)	3	2	5	2015-04-14	230	2015-04-29	245	2015-05-08	254	24
NIL2 (Lov intro)	3	6	1	2015-04-08	224	2015-04-23	239	2015-04-26	242	18
NIL2 (Lov intro)	3	6	7	2015-04-08	224	2015-04-23	239	2015-05-02	248	24
NIL2 (Lov intro)	3	6	8	2015-04-08	224	2015-04-23	239	2015-04-26	242	18
NIL2 (Lov intro)	4	1	6	2015-04-08	224	2015-04-20	236	2015-04-26	242	18
NIL2 (Lov intro)	4	2	1	2015-04-23	(239)	8 may (bud grazed)	(254)	21 may (bud grazed)	(267)	(28)
NIL2 (Lov intro)	4	2	2	2015-04-08	224	2015-04-23	239	2015-04-26	242	18
NIL2 (Lov intro)	4	3	7	2015-04-11	227	2015-04-23	239	2015-04-29	245	18
NIL2 (Lov intro)	4	4	8	2015-04-08	224	2015-04-23	239	2015-04-26	242	18
NIL2 (Lov intro)	4	5	3	2015-04-08	224	2015-04-26	242	2015-05-02	248	24
NIL2 (Lov intro)	4	6	7	2015-04-11	227	2015-04-26	242	2015-05-02	248	21
NIL2 (Lov intro)	5	2	6	2015-04-11	227	2015-04-23	239	2015-04-29	245	18
NIL2 (Lov intro)	5	3	1	2015-04-11	227	2015-04-26	242	2015-05-02	248	21
NIL2 (Lov intro)	5	3	10	2015-04-17	233	2015-05-02	248	2015-05-21	267	34
NIL2 (Lov intro)	5	5	4	2015-04-11	227	2015-04-26	242	2015-05-02	248	21
NIL2 (Lov intro)	5	6	9	2015-04-26	242	2015-05-21	267	2015-05-21	267	25
NIL2 (Lov intro)	6	3	4	2015-04-29	245	2015-05-21	267	2015-05-21	267	22
NIL2 (Lov intro)	6	3	10	2015-04-20	236	2015-05-08	254	2015-05-21	267	31
NIL2 (Lov intro)	6	4	7	2015-04-23	239	2015-05-08	254	2015-05-21	267	28
NIL2 (Lov intro)	6	5	2	2015-04-23	239	2015-05-21	267	2015-05-21	267	28
Ull 2-5	1	1	2	2015-04-08	224	2015-04-29	245	2015-05-02	248	24
Ull 2-5	1	2	9	2015-04-11	227	2015-04-26	242	2015-05-02	248	21
Ull 2-5	1	3	8	2015-04-17	233	2015-05-02	248	2015-05-08	254	21
Ull 2-5	1	3	10	2015-04-11	227	2015-04-23	239	2015-05-02	248	21
Ull 2-5	1	5	3	2015-04-08	224	2015-04-23	239	2015-04-26	242	18
Ull 2-5	1	5	6	2015-04-17	233	2015-05-08	254	2015-05-21	267	34
Ull 2-5	1	6	9	2015-04-11	227	2015-04-23	239	2015-04-26	242	15
Ull 2-5	1	6	10	2015-04-11	227	2015-04-26	242	2015-05-02	248	21
Ull 2-5	1	6	11	2015-04-11	227	2015-04-29	245	2015-05-02	248	21
Ull 2-5	2	3	10	2015-04-11	227	2015-05-02	248	2015-05-02	248	21
Ull 2-5	2	4	8	2015-04-11	227	2015-04-23	239	2015-04-29	245	18
Ull 2-5	3	1	11	2015-04-17	233	2015-05-21	267	2015-05-08	254	21
Ull 2-5	3	2	6	2015-04-17	233	2015-05-08	254	2015-05-21	267	34
Ull 2-5	3	3	6	2015-04-26	242	2015-05-21	267	2015-05-21	267	25
Ull 2-5	3	3	7	2015-04-20	236	2015-05-08	254	2015-05-21	267	31
Ull 2-5	3	4	4	2015-04-20	236	2015-05-08	254	2015-05-08	254	18
Ull 2-5	3	5	9	2015-04-17	233	2015-05-02	248	2015-05-08	254	21
Ull 2-5	4	3	10	2015-04-11	227	2015-04-29	245	2015-04-29	245	18
Ull 2-5	4	4	3	2015-04-14	230	2015-04-29	245	2015-05-02	248	18
Ull 2-5	4	5	4	2015-04-14	230	2015-05-08	254	2015-05-08	254	24
Ull 2-5	4	5	5	2015-04-23	(239)	21 may (bud grazed)	(267)	21 may (bud grazed)	(267)	(28)
Ull 2-5	4	6	1	2015-04-20	(236)	8 may (plant/bud grazed)	(254)	21 may (plant/bud grazed)	(267)	(31)
Ull 2-5	4	6	6	2015-04-17	(233)	8 may (bud grazed)	(254)	8 may (bud grazed)	(254)	(21)
Ull 2-5	4	6	8	2015-04-14	230	stalk grazed
Ull 2-5	4	6	11	2015-04-14	230	2015-05-21	267	2015-05-02	248	18
Ull 2-5	5	4	5	2015-04-17	233	2015-05-02	248	2015-05-08	254	21
Ull 2-5	5	4	11	2015-04-14	230	2015-05-08	254	2015-05-08	254	24
Ull 2-5	5	5	3	2015-04-14	230	2015-04-29	245	2015-05-08	254	24
Ull 2-5	5	5	10	2015-04-20	236	2015-05-08	254	2015-05-08	254	18
Ull 2-5	5	6	5	2015-04-14	230	2015-05-02	248	2015-05-02	248	18
Ull 2-5	6	1	5	2015-04-17	233	2015-05-02	248	2015-05-08	254	21
Ull 2-5	6	5	6	2015-04-14	230	2015-04-29	245	2015-05-02	248	18
Ull 2-5	6	6	1	2015-04-14	230	2015-04-26	242	2015-05-08	254	24
Ull 2-5	6	6	5	2015-04-26	242	2015-05-21	267	2015-05-21	267	25
Ull 2-5	6	6	7	2015-04-14	230	2015-04-29	245	2015-04-29	245	15
Ull 2-5	6	6	10	2015-04-17	233	2015-05-08	254	2015-05-08	254	21
Var 2-6	1	4	3	2015-04-11	227	2015-05-08	254	2015-04-29	245	18
Var 2-6	1	6	2	2015-04-14	230	2015-05-08	254	2015-05-08	254	24
Var 2-6	2	1	6	xxxxxxxxx	xxxxxxxxxxxxxxxxxxxxxxxxxx	xxxxxxxxxxxxxxxxxxxxxxxxxxxx	xxxxxxxxxxxxxxxxxxxxxxxxxxxx	xxxxxxxxxxxxxxxxxxxxxxxx	xxxxxxxxxxxxxxxxxxxxxxxxxxxxxx	xxxxxxxxxxxxxxxxxxxxxxxxxxxxxxx
Var 2-6	2	1	9	2015-04-11	227	2015-05-21	267	2015-05-02	248	21
Var 2-6	2	2	8	2015-04-05	221	2015-05-21	267	2015-05-02	248	27
Var 2-6	2	2	11	2015-04-05	221	2015-05-08	254	2015-04-26	242	21
Var 2-6	2	3	5	2015-04-11	227	2015-05-08	254	2015-04-26	242	15
Var 2-6	2	4	1	2015-04-11	227	2015-05-08	254	2015-04-29	245	18
Var 2-6	2	5	10	2015-04-08	224	8 may (1st stalk grazed)	(254)	21 may (1st stalk grazed)	(267)	(43)
Var 2-6	2	6	10	2015-04-14	230	2015-05-21	267	2015-05-02	248	18
Var 2-6	3	1	4	2015-04-11	227	2015-05-21	267	2015-05-08	254	27
Var 2-6	3	4	2	2015-04-11	227	2015-05-08	254	2015-05-02	248	21
Var 2-6	3	4	8	2015-04-17	233	2015-05-21	267	2015-05-08	254	21
Var 2-6	3	5	1	2015-04-11	227	2015-05-08	254	2015-05-02	248	21
Var 2-6	4	2	5	2015-04-11	227	2015-05-21	267	2015-05-02	248	21
Var 2-6	4	2	8	2015-04-11	227	2015-05-21	267	2015-04-29	245	18
Var 2-6	4	3	5	2015-04-11	227	2015-05-08	254	2015-04-29	245	18
Var 2-6	4	4	4	2015-04-11	227	2015-05-21	267	2015-05-02	248	21
Var 2-6	4	4	10	2015-04-11	227	2015-05-21	267	2015-05-02	248	21
Var 2-6	4	5	7	2015-04-11	227	2015-05-08	254	2015-05-08	254	27
Var 2-6	4	5	8	2015-04-08	224	2015-05-08	254	2015-04-29	245	21
Var 2-6	4	6	2	2015-04-14	230	2015-05-21	267	2015-05-08	254	24
Var 2-6	5	1	4	2015-04-11	227	2015-05-21	267	2015-04-29	245	18
Var 2-6	5	1	8	2015-04-17	233	2015-05-21	267	2015-05-08	254	21
Var 2-6	5	2	2	2015-04-11	227	2015-05-21	267	2015-04-29	245	18
Var 2-6	5	2	3	2015-04-14	230	2015-05-21	267	2015-05-08	254	24
Var 2-6	5	2	5	2015-04-11	227	2015-05-21	267	2015-04-29	245	18
Var 2-6	5	2	11	2015-04-17	233	2015-05-21	267	2015-05-21	267	34
Var 2-6	5	4	2	2015-04-14	230	2015-05-21	267	2015-05-08	254	24
Var 2-6	5	6	11	2015-04-11	227	2015-05-21	267	2015-04-29	245	18
Var 2-6	6	1	2	2015-04-14	230	2015-05-08	254	2015-05-02	248	18
Var 2-6	6	1	3	2015-04-14	230	2015-05-08	254	2015-05-02	248	18
Var 2-6	6	1	4	2015-04-14	230	2015-05-21	267	2015-05-08	254	24
Var 2-6	6	3	9	2015-04-23	239	2015-05-21	267	2015-05-21	267	28
Var 2-6	6	6	4	2015-04-14	230	2015-05-21	267	2015-05-08	254	24
Var 2-6	6	6	9	2015-04-14	230	2015-05-21	267	2015-04-29	245	15

## Sheet: North Sweden B 14-15 flowering
Genotype 2	Tray	Row	Position	Bud date	Days from sowing to budding	+3 cm stalk date	Days from sowing to +3 cm stalk	Flowering date	Days from sowing to open flowers	Days from budding to open flowers	Date of sowing
Col FRI	1	2	11	2015-04-11	213	2015-05-02	248	2015-05-08	254	41	2014-09-10		empty
Col FRI	1	3	1	2015-04-11	213	2015-05-02	248	2015-05-02	248	35		xxxxxxxx	dead
Col FRI	1	3	5	2015-04-11	213	2015-04-29	245	2015-04-29	245	32			"strange" leaves, "infected"(?), half dead or covered with organic matter from the beginning (just after snow)
Col FRI	1	4	1	2015-04-11	213	2015-04-26	242	2015-04-26	242	29			grazed or stalk broken
Col FRI	1	4	6	xxxxxxxxx		xxxxxxxxxxxxxxxxxxxxxxxx	xxxxxxxxxxxxxxxxxxxxxxxxxxxx	xxxxxxxxxxxxxxxxxxxxxxxxxxxxxxxxxxxxxxxxxxxxxx	xxxxxxxxxxxxxxxxxxxxxxxxxxxxxxx	xxxxxxxxxxxxxxxxxxxxxxxxxxxxxxxx			grazed but only leaves
Col FRI	1	6	10	2015-04-11	213	2015-04-29	245	2015-05-08	254	41			+3 cm stalk or open flowers on 8 May (6 days after previous recording)
Col FRI	2	3	3	xxxxxxxxx		xxxxxxxxxxxxxxxxxxxxxxxx	xxxxxxxxxxxxxxxxxxxxxxxxxxxx	xxxxxxxxxxxxxxxxxxxxxxxxxxxxxxxxxxxxxxxxxxxxxx	xxxxxxxxxxxxxxxxxxxxxxxxxxxxxxx	xxxxxxxxxxxxxxxxxxxxxxxxxxxxxxxx			+3 cm stalk or open flowers on 21 May (13 days after previous recording)
Col FRI	2	3	5	xxxxxxxxx		xxxxxxxxxxxxxxxxxxxxxxxx	xxxxxxxxxxxxxxxxxxxxxxxxxxxx	xxxxxxxxxxxxxxxxxxxxxxxxxxxxxxxxxxxxxxxxxxxxxx	xxxxxxxxxxxxxxxxxxxxxxxxxxxxxxx	xxxxxxxxxxxxxxxxxxxxxxxxxxxxxxxx			not finished before 21 May
Col FRI	2	4	8	2015-04-14	216	2015-05-02	248	2015-05-08	254	38
Col FRI	2	4	9	xxxxxxxxx		xxxxxxxxxxxxxxxxxxxxxxxx	xxxxxxxxxxxxxxxxxxxxxxxxxxxx	xxxxxxxxxxxxxxxxxxxxxxxxxxxxxxxxxxxxxxxxxxxxxx	xxxxxxxxxxxxxxxxxxxxxxxxxxxxxxx	xxxxxxxxxxxxxxxxxxxxxxxxxxxxxxxx
Col FRI	2	5	10	2015-04-11	213	2015-05-02	248	2015-05-02	248	35
Col FRI	2	6	3	xxxxxxxxx		xxxxxxxxxxxxxxxxxxxxxxxx	xxxxxxxxxxxxxxxxxxxxxxxxxxxx	xxxxxxxxxxxxxxxxxxxxxxxxxxxxxxxxxxxxxxxxxxxxxx	xxxxxxxxxxxxxxxxxxxxxxxxxxxxxxx	xxxxxxxxxxxxxxxxxxxxxxxxxxxxxxxx
Col FRI	3	4	6	2015-04-17	219	2015-05-21	267	2015-05-21	267	48
Col FRI	3	5	7	2015-04-29	231	2015-05-21	267	2015-05-21	267	36
Col FRI	3	5	11	2015-04-17	219	2015-05-08	254	2015-05-08	254	35
Col FRI	4	1	9	2015-04-14	216	2015-05-02	248	2015-05-08	254	38
Col FRI	4	3	1	2015-04-11	213	2015-04-26	242	2015-04-29	245	32
Col FRI	4	3	10	2015-04-17	219	2015-05-08	254	2015-05-21	267	48
Col FRI	4	6	5	xxxxxxxxx		xxxxxxxxxxxxxxxxxxxxxxxx	xxxxxxxxxxxxxxxxxxxxxxxxxxxx	xxxxxxxxxxxxxxxxxxxxxxxxxxxxxxxxxxxxxxxxxxxxxx	xxxxxxxxxxxxxxxxxxxxxxxxxxxxxxx	xxxxxxxxxxxxxxxxxxxxxxxxxxxxxxxx
Col FRI	5	1	3	2015-04-08	210	2015-04-26	242	2015-04-26	242	32
Col FRI	5	2	2	xxxxxxxxx		xxxxxxxxxxxxxxxxxxxxxxxx	xxxxxxxxxxxxxxxxxxxxxxxxxxxx	xxxxxxxxxxxxxxxxxxxxxxxxxxxxxxxxxxxxxxxxxxxxxx	xxxxxxxxxxxxxxxxxxxxxxxxxxxxxxx	xxxxxxxxxxxxxxxxxxxxxxxxxxxxxxxx
Col FRI	5	2	10	2015-04-17	219	2015-05-08	254	2015-05-08	254	35
Col FRI	5	3	2	2015-04-11	213	2015-05-02	248	2015-05-02	248	35
Col FRI	5	3	3	xxxxxxxxx		xxxxxxxxxxxxxxxxxxxxxxxx	xxxxxxxxxxxxxxxxxxxxxxxxxxxx	xxxxxxxxxxxxxxxxxxxxxxxxxxxxxxxxxxxxxxxxxxxxxx	xxxxxxxxxxxxxxxxxxxxxxxxxxxxxxx	xxxxxxxxxxxxxxxxxxxxxxxxxxxxxxxx
Col FRI	5	4	7	2015-04-14	216	2015-05-02	248	2015-05-08	254	38
Col FRI	5	5	3	2015-04-11	213	2015-05-02	248	2015-05-08	254	41
Col FRI	5	5	8	xxxxxxxxx		xxxxxxxxxxxxxxxxxxxxxxxx	xxxxxxxxxxxxxxxxxxxxxxxxxxxx	xxxxxxxxxxxxxxxxxxxxxxxxxxxxxxxxxxxxxxxxxxxxxx	xxxxxxxxxxxxxxxxxxxxxxxxxxxxxxx	xxxxxxxxxxxxxxxxxxxxxxxxxxxxxxxx
Col FRI	5	5	9	2015-04-14	216	2015-05-02	248	2015-05-08	254	38
Col FRI	5	6	2	xxxxxxxxx		xxxxxxxxxxxxxxxxxxxxxxxx	xxxxxxxxxxxxxxxxxxxxxxxxxxxx	xxxxxxxxxxxxxxxxxxxxxxxxxxxxxxxxxxxxxxxxxxxxxx	xxxxxxxxxxxxxxxxxxxxxxxxxxxxxxx	xxxxxxxxxxxxxxxxxxxxxxxxxxxxxxxx
Col FRI	5	6	9	2015-04-11	213	2015-04-29	245	2015-05-02	248	35
Col FRI	6	1	8	2015-04-08	210	2015-04-23	239	2015-04-23	239	29
Col FRI	6	2	6	2015-04-11	213	2015-04-29	245	2015-05-02	248	35
Col FRI	6	2	10	2015-04-14	216	2015-04-29	245	2015-05-02	248	32
Col FRI	6	3	7	2015-04-11	213	2015-04-26	242	2015-05-02	248	35
Col FRI	6	4	11	2015-04-11	213	2015-04-29	245	2015-05-02	248	35
Col FRI	6	5	9	2015-04-11	213	2015-04-26	242	2015-05-02	248	35
Lov NIL1	1	1	6	2015-04-29	231	2015-05-21	267	2015-05-21	267	36
Lov NIL1	1	1	9	2015-04-14	216	2015-05-02	248	2015-05-08	254	38
Lov NIL1	1	4	9	2015-04-11	213	2015-04-29	245	2015-05-02	248	35
Lov NIL1	2	1	6	2015-04-29	231	2015-05-21	267	no white
Lov NIL1	2	2	2	2015-04-11	213	2015-05-08	254	2015-05-02	248	35
Lov NIL1	2	2	4	xxxxxxxxx		xxxxxxxxxxxxxxxxxxxxxxxx	xxxxxxxxxxxxxxxxxxxxxxxxxxxx	xxxxxxxxxxxxxxxxxxxxxxxxxxxxxxxxxxxxxxxxxxxxxx	xxxxxxxxxxxxxxxxxxxxxxxxxxxxxxx	xxxxxxxxxxxxxxxxxxxxxxxxxxxxxxxx
Lov NIL1	2	3	1	2015-04-11	213	2015-05-08	254	2015-05-08	254	41
Lov NIL1	2	3	2	xxxxxxxxx		xxxxxxxxxxxxxxxxxxxxxxxx	xxxxxxxxxxxxxxxxxxxxxxxxxxxx	xxxxxxxxxxxxxxxxxxxxxxxxxxxxxxxxxxxxxxxxxxxxxx	xxxxxxxxxxxxxxxxxxxxxxxxxxxxxxx	xxxxxxxxxxxxxxxxxxxxxxxxxxxxxxxx
Lov NIL1	2	3	7	2015-04-17	219	2015-05-08	254	2015-05-21	267	48
Lov NIL1	2	5	1	2015-04-11	213	2015-05-02	248	2015-05-08	254	41
Lov NIL1	2	5	9	2015-04-11	213	2015-05-08	254	2015-05-08	254	41
Lov NIL1	3	1	2	xxxxxxxxx		xxxxxxxxxxxxxxxxxxxxxxxx	xxxxxxxxxxxxxxxxxxxxxxxxxxxx	xxxxxxxxxxxxxxxxxxxxxxxxxxxxxxxxxxxxxxxxxxxxxx	xxxxxxxxxxxxxxxxxxxxxxxxxxxxxxx	xxxxxxxxxxxxxxxxxxxxxxxxxxxxxxxx
Lov NIL1	3	1	4	2015-04-08	210	2015-04-26	242	2015-05-02	248	38
Lov NIL1	3	2	2	2015-04-11	213	2015-05-02	248	2015-05-08	254	41
Lov NIL1	4	2	2	2015-04-08	210	2015-04-26	242	2015-04-29	245	35
Lov NIL1	4	3	9	2015-04-11	213	2015-05-02	248	2015-05-08	254	41
Lov NIL1	4	4	6	2015-04-11	213	2015-04-29	245	2015-05-08	254	41
Lov NIL1	4	4	8	2015-04-14	216	2015-05-08	254	2015-05-08	254	38
Lov NIL1	4	5	4	2015-04-11	213	2015-05-02	248	2015-05-02	248	35
Lov NIL1	5	1	6	2015-04-11	213	2015-05-08	254	2015-05-08	254	41
Lov NIL1	5	1	8	2015-04-11	213	2015-04-29	245	2015-05-08	254	41
Lov NIL1	5	3	1	2015-04-11	213	2015-04-29	245	2015-05-02	248	35
Lov NIL1	5	4	6	2015-04-14	216	2015-05-02	248	2015-05-21	267	51
Lov NIL1	5	4	10	2015-04-11	213	2015-05-02	248	2015-05-02	248	35
Lov NIL1	5	5	6	xxxxxxxxx		xxxxxxxxxxxxxxxxxxxxxxxx	xxxxxxxxxxxxxxxxxxxxxxxxxxxx	xxxxxxxxxxxxxxxxxxxxxxxxxxxxxxxxxxxxxxxxxxxxxx	xxxxxxxxxxxxxxxxxxxxxxxxxxxxxxx	xxxxxxxxxxxxxxxxxxxxxxxxxxxxxxxx
Lov NIL1	5	5	7	2015-04-14	216	2015-05-08	254	2015-05-08	254	38
Lov NIL1	5	5	10	2015-04-11	213	2015-05-02	248	2015-05-08	254	41
Lov NIL1	5	6	1	2015-04-11	213	2015-04-26	242	2015-04-29	245	32
Lov NIL1	5	6	3	xxxxxxxxx		xxxxxxxxxxxxxxxxxxxxxxxx	xxxxxxxxxxxxxxxxxxxxxxxxxxxx	xxxxxxxxxxxxxxxxxxxxxxxxxxxxxxxxxxxxxxxxxxxxxx	xxxxxxxxxxxxxxxxxxxxxxxxxxxxxxx	xxxxxxxxxxxxxxxxxxxxxxxxxxxxxxxx
Lov NIL1	6	1	5	2015-04-11	213	2015-04-23	239	2015-04-29	245	32
Lov NIL1	6	1	9	2015-04-11	213	2015-04-23	239	2015-04-29	245	32
Lov NIL1	6	3	2	2015-04-08	210	2015-04-23	239	2015-04-26	242	32
Lov NIL1	6	3	6	2015-04-11	213	2015-04-23	239	2015-05-02	248	35
Lov NIL1	6	4	9	2015-04-11	213	2015-04-26	242	2015-04-29	245	32
Lov NIL1	6	6	5	2015-04-11	213	2015-04-26	242	2015-05-02	248	35
Lov NIL1	6	6	11	xxxxxxxxx		xxxxxxxxxxxxxxxxxxxxxxxx	xxxxxxxxxxxxxxxxxxxxxxxxxxxx	xxxxxxxxxxxxxxxxxxxxxxxxxxxxxxxxxxxxxxxxxxxxxx	xxxxxxxxxxxxxxxxxxxxxxxxxxxxxxx	xxxxxxxxxxxxxxxxxxxxxxxxxxxxxxxx
Lov NIL2	1	2	1	2015-04-11	213	2015-05-02	248	2015-04-29	245	32
Lov NIL2	1	3	6	xxxxxxxxx		xxxxxxxxxxxxxxxxxxxxxxxx	xxxxxxxxxxxxxxxxxxxxxxxxxxxx	xxxxxxxxxxxxxxxxxxxxxxxxxxxxxxxxxxxxxxxxxxxxxx	xxxxxxxxxxxxxxxxxxxxxxxxxxxxxxx	xxxxxxxxxxxxxxxxxxxxxxxxxxxxxxxx
Lov NIL2	1	4	8	2015-04-14	216	2015-05-02	248	2015-05-02	248	32
Lov NIL2	1	4	10	2015-04-17	219	2015-05-08	254	2015-05-08	254	35
Lov NIL2	1	5	5	2015-04-11	213	2015-05-02	248	2015-05-08	254	41
Lov NIL2	1	5	9	xxxxxxxxx		xxxxxxxxxxxxxxxxxxxxxxxx	xxxxxxxxxxxxxxxxxxxxxxxxxxxx	xxxxxxxxxxxxxxxxxxxxxxxxxxxxxxxxxxxxxxxxxxxxxx	xxxxxxxxxxxxxxxxxxxxxxxxxxxxxxx	xxxxxxxxxxxxxxxxxxxxxxxxxxxxxxxx
Lov NIL2	2	1	7	2015-04-14	216	2015-05-08	254	2015-05-08	254	38
Lov NIL2	2	3	9	2015-04-17	219	2015-05-21	267	2015-05-21	267	48
Lov NIL2	2	3	11	xxxxxxxxx		xxxxxxxxxxxxxxxxxxxxxxxx	xxxxxxxxxxxxxxxxxxxxxxxxxxxx	xxxxxxxxxxxxxxxxxxxxxxxxxxxxxxxxxxxxxxxxxxxxxx	xxxxxxxxxxxxxxxxxxxxxxxxxxxxxxx	xxxxxxxxxxxxxxxxxxxxxxxxxxxxxxxx
Lov NIL2	2	4	1	2015-04-11	213	2015-05-02	248	2015-05-02	248	35
Lov NIL2	2	5	7	2015-04-23	225	2015-05-21	267	2015-05-21	267	42
Lov NIL2	2	6	5	xxxxxxxxx		xxxxxxxxxxxxxxxxxxxxxxxx	xxxxxxxxxxxxxxxxxxxxxxxxxxxx	xxxxxxxxxxxxxxxxxxxxxxxxxxxxxxxxxxxxxxxxxxxxxx	xxxxxxxxxxxxxxxxxxxxxxxxxxxxxxx	xxxxxxxxxxxxxxxxxxxxxxxxxxxxxxxx
Lov NIL2	2	6	7	2015-04-20	222	2015-05-21	267	2015-05-21	267	45
Lov NIL2	3	1	5	2015-04-11	213	2015-05-08	254	2015-05-08	254	41
Lov NIL2	3	1	6	2015-04-11	213	2015-05-08	254	2015-05-08	254	41
Lov NIL2	3	1	11	2015-04-29	231	2015-05-21	267	2015-05-21	267	36
Lov NIL2	3	4	11	2015-04-14	216	2015-05-08	254	2015-05-08	254	38
Lov NIL2	3	5	5	2015-05-02	234	2015-05-21	267	2015-05-21	267	33
Lov NIL2	4	1	1	2015-04-08	210	2015-04-26	242	2015-04-26	242	32
Lov NIL2	4	3	11	2015-04-11	213	2015-04-26	242	2015-04-29	245	32
Lov NIL2	4	4	2	2015-04-14	216	2015-05-08	254	2015-05-21	267	51
Lov NIL2	4	4	4	2015-04-11	213	2015-04-29	245	2015-04-29	245	32
Lov NIL2	4	4	7	2015-04-14	216	2015-05-08	254	2015-05-08	254	38
Lov NIL2	4	5	10	2015-04-11	213	2015-05-02	248	2015-05-02	248	35
Lov NIL2	4	6	10	2015-04-11	213	2015-05-08	254	2015-05-08	254	41
Lov NIL2	5	2	11	2015-04-11	213	2015-04-29	245	2015-04-29	245	32
Lov NIL2	5	5	2	xxxxxxxxx		xxxxxxxxxxxxxxxxxxxxxxxx	xxxxxxxxxxxxxxxxxxxxxxxxxxxx	xxxxxxxxxxxxxxxxxxxxxxxxxxxxxxxxxxxxxxxxxxxxxx	xxxxxxxxxxxxxxxxxxxxxxxxxxxxxxx	xxxxxxxxxxxxxxxxxxxxxxxxxxxxxxxx
Lov NIL2	5	6	8	xxxxxxxxx		xxxxxxxxxxxxxxxxxxxxxxxx	xxxxxxxxxxxxxxxxxxxxxxxxxxxx	xxxxxxxxxxxxxxxxxxxxxxxxxxxxxxxxxxxxxxxxxxxxxx	xxxxxxxxxxxxxxxxxxxxxxxxxxxxxxx	xxxxxxxxxxxxxxxxxxxxxxxxxxxxxxxx
Lov NIL2	5	6	11	xxxxxxxxx		xxxxxxxxxxxxxxxxxxxxxxxx	xxxxxxxxxxxxxxxxxxxxxxxxxxxx	xxxxxxxxxxxxxxxxxxxxxxxxxxxxxxxxxxxxxxxxxxxxxx	xxxxxxxxxxxxxxxxxxxxxxxxxxxxxxx	xxxxxxxxxxxxxxxxxxxxxxxxxxxxxxxx
Lov NIL2	6	1	4	2015-04-08	210	2015-04-23	239	2015-04-23	239	29
Lov NIL2	6	2	1	2015-04-08	210	2015-04-23	239	2015-04-23	239	29
Lov NIL2	6	2	8	xxxxxxxxx		xxxxxxxxxxxxxxxxxxxxxxxx	xxxxxxxxxxxxxxxxxxxxxxxxxxxx	xxxxxxxxxxxxxxxxxxxxxxxxxxxxxxxxxxxxxxxxxxxxxx	xxxxxxxxxxxxxxxxxxxxxxxxxxxxxxx	xxxxxxxxxxxxxxxxxxxxxxxxxxxxxxxx
Lov NIL2	6	2	11	2015-04-11	213	2015-04-26	242	2015-04-29	245	32
Lov NIL2	6	3	1	2015-04-08	210	2015-04-23	239	2015-05-21	267	57
Lov NIL2	6	3	10	2015-04-11	213	2015-04-29	245	2015-05-02	248	35
Lov NIL2	6	5	8	2015-04-17	219	2015-05-21	267	2015-05-21	267	48
Col-0	1	1	2	2015-04-11	213	2015-04-26	242	2015-05-02	248	35
Col-0	1	1	4	2015-04-11	213	2015-04-29	245	2015-04-29	245	32
Col-0	1	1	11	2015-04-11	213	2015-04-29	245	2015-05-02	248	35
Col-0	1	3	4	2015-04-29	231	2015-05-21	267	no white
Col-0	1	3	9	2015-04-14	216	2015-05-02	248	2015-05-08	254	38
Col-0	1	4	11	2015-04-14	216	2015-05-02	248	2015-05-02	248	32
Col-0	1	5	10	2015-04-14	216	2015-05-02	248	2015-05-08	254	38
Col-0	1	6	1	2015-04-11	213	2015-05-02	248	2015-05-02	248	35
Col-0	1	6	7	xxxxxxxxx		xxxxxxxxxxxxxxxxxxxxxxxx	xxxxxxxxxxxxxxxxxxxxxxxxxxxx	xxxxxxxxxxxxxxxxxxxxxxxxxxxxxxxxxxxxxxxxxxxxxx	xxxxxxxxxxxxxxxxxxxxxxxxxxxxxxx	xxxxxxxxxxxxxxxxxxxxxxxxxxxxxxxx
Col-0	2	1	3	xxxxxxxxx		xxxxxxxxxxxxxxxxxxxxxxxx	xxxxxxxxxxxxxxxxxxxxxxxxxxxx	xxxxxxxxxxxxxxxxxxxxxxxxxxxxxxxxxxxxxxxxxxxxxx	xxxxxxxxxxxxxxxxxxxxxxxxxxxxxxx	xxxxxxxxxxxxxxxxxxxxxxxxxxxxxxxx
Col-0	2	1	5	2015-04-11	213	2015-05-02	248	2015-05-08	254	41
Col-0	2	2	6	2015-04-14	216	2015-05-02	248	2015-05-08	254	38
Col-0	2	4	5	2015-04-23	225	2015-05-21	267	2015-05-21	267	42
Col-0	2	5	8	2015-04-11	213	2015-05-02	248	2015-05-02	248	35
Col-0	2	6	1	2015-04-11	213	2015-05-02	248	2015-05-08	254	41
Col-0	3	2	1	2015-04-11	213	2015-04-23	239	2015-05-02	248	35
Col-0	3	2	3	2015-04-11	213	2015-04-26	242	2015-04-29	245	32
Col-0	3	3	5	2015-04-11	213	stalk grazed
Col-0	3	3	9	2015-04-29	231	2015-05-21	267	2015-05-21	267	36
Col-0	3	4	7	2015-04-14	216	2015-05-02	248	2015-05-08	254	38
Col-0	3	5	9	2015-04-17	219	2015-05-08	254	2015-05-21	267	48
Col-0	4	1	2	2015-04-08	210	2015-04-23	239	2015-04-23	239	29
Col-0	4	2	3	2015-04-08	210	2015-04-23	239	2015-04-23	239	29
Col-0	4	2	6	2015-04-11	213	2015-04-29	245	2015-05-02	248	35
Col-0	4	4	9	xxxxxxxxx		xxxxxxxxxxxxxxxxxxxxxxxx	xxxxxxxxxxxxxxxxxxxxxxxxxxxx	xxxxxxxxxxxxxxxxxxxxxxxxxxxxxxxxxxxxxxxxxxxxxx	xxxxxxxxxxxxxxxxxxxxxxxxxxxxxxx	xxxxxxxxxxxxxxxxxxxxxxxxxxxxxxxx
Col-0	4	5	6	xxxxxxxxx		xxxxxxxxxxxxxxxxxxxxxxxx	xxxxxxxxxxxxxxxxxxxxxxxxxxxx	xxxxxxxxxxxxxxxxxxxxxxxxxxxxxxxxxxxxxxxxxxxxxx	xxxxxxxxxxxxxxxxxxxxxxxxxxxxxxx	xxxxxxxxxxxxxxxxxxxxxxxxxxxxxxxx
Col-0	4	5	7	xxxxxxxxx		xxxxxxxxxxxxxxxxxxxxxxxx	xxxxxxxxxxxxxxxxxxxxxxxxxxxx	xxxxxxxxxxxxxxxxxxxxxxxxxxxxxxxxxxxxxxxxxxxxxx	xxxxxxxxxxxxxxxxxxxxxxxxxxxxxxx	xxxxxxxxxxxxxxxxxxxxxxxxxxxxxxxx
Col-0	4	5	9	xxxxxxxxx		xxxxxxxxxxxxxxxxxxxxxxxx	xxxxxxxxxxxxxxxxxxxxxxxxxxxx	xxxxxxxxxxxxxxxxxxxxxxxxxxxxxxxxxxxxxxxxxxxxxx	xxxxxxxxxxxxxxxxxxxxxxxxxxxxxxx	xxxxxxxxxxxxxxxxxxxxxxxxxxxxxxxx
Col-0	5	1	1	2015-04-08	210	stalk grazed (new 21 may)	(267)	new 21 may	(267)	(57)
Col-0	5	1	11	2015-04-11	213	2015-04-29	245	2015-04-29	245	32
Col-0	5	2	6	2015-04-26	228	2015-05-21	267	2015-05-21	267	39
Col-0	5	3	10	2015-04-14	216	2015-05-02	248	2015-05-08	254	38
Col-0	5	5	4	2015-04-11	213	2015-04-29	245	2015-05-02	248	35
Col-0	6	1	7	2015-04-08	210	2015-04-23	239	2015-04-23	239	29
Col-0	6	4	6	2015-04-14	216	2015-04-29	245	2015-05-02	248	32
Col-0	6	6	10	2015-04-11	213	2015-04-26	242	2015-04-29	245	32
Bro1-6	1	2	8	2015-04-20	222	2015-05-21	267	2015-05-21	267	45
Bro1-6	1	6	2	2015-04-20	222	2015-05-08	254	2015-05-21	267	45
Bro1-6	2	2	3	2015-04-17	219	2015-05-08	254	2015-05-08	254	35
Bro1-6	2	2	7	2015-04-20	222	2015-05-08	254	2015-05-08	254	32
Bro1-6	2	3	8	2015-04-23	225	2015-05-21	267	2015-05-21	267	42
Bro1-6	2	4	3	xxxxxxxxx		xxxxxxxxxxxxxxxxxxxxxxxx	xxxxxxxxxxxxxxxxxxxxxxxxxxxx	xxxxxxxxxxxxxxxxxxxxxxxxxxxxxxxxxxxxxxxxxxxxxx	xxxxxxxxxxxxxxxxxxxxxxxxxxxxxxx	xxxxxxxxxxxxxxxxxxxxxxxxxxxxxxxx
Bro1-6	2	5	2	xxxxxxxxx		xxxxxxxxxxxxxxxxxxxxxxxx	xxxxxxxxxxxxxxxxxxxxxxxxxxxx	xxxxxxxxxxxxxxxxxxxxxxxxxxxxxxxxxxxxxxxxxxxxxx	xxxxxxxxxxxxxxxxxxxxxxxxxxxxxxx	xxxxxxxxxxxxxxxxxxxxxxxxxxxxxxxx
Bro1-6	2	5	5	2015-04-23	225	2015-05-21	267	2015-05-21	267	42
Bro1-6	2	6	4	2015-04-23	225	2015-05-21	267	2015-05-21	267	42
Bro1-6	2	6	6	xxxxxxxxx		xxxxxxxxxxxxxxxxxxxxxxxx	xxxxxxxxxxxxxxxxxxxxxxxxxxxx	xxxxxxxxxxxxxxxxxxxxxxxxxxxxxxxxxxxxxxxxxxxxxx	xxxxxxxxxxxxxxxxxxxxxxxxxxxxxxx	xxxxxxxxxxxxxxxxxxxxxxxxxxxxxxxx
Bro1-6	2	6	8	2015-04-14	216	2015-05-08	254	2015-05-02	248	32
Bro1-6	2	6	9	xxxxxxxxx		xxxxxxxxxxxxxxxxxxxxxxxx	xxxxxxxxxxxxxxxxxxxxxxxxxxxx	xxxxxxxxxxxxxxxxxxxxxxxxxxxxxxxxxxxxxxxxxxxxxx	xxxxxxxxxxxxxxxxxxxxxxxxxxxxxxx	xxxxxxxxxxxxxxxxxxxxxxxxxxxxxxxx
Bro1-6	3	1	1	2015-04-17	219	2015-05-08	254	2015-05-08	254	35
Bro1-6	3	2	5	2015-04-23	225	2015-05-21	267	2015-05-21	267	42
Bro1-6	3	3	2	2015-04-20	222	2015-05-21	267	2015-05-21	267	45
Bro1-6	3	3	6	2015-04-20	222	2015-05-08	254	2015-05-21	267	45
Bro1-6	3	5	8	2015-04-20	222	2015-05-21	267	2015-05-21	267	45
Bro1-6	3	6	9	2015-04-20	222	2015-05-08	254	2015-05-21	267	45
Bro1-6	3	6	10	2015-04-20	222	2015-05-08	254	2015-05-21	267	45
Bro1-6	4	1	6	2015-04-20	222	2015-05-08	254	2015-05-08	254	32
Bro1-6	4	2	9	2015-04-23	225	2015-05-21	267	2015-05-21	267	42
Bro1-6	4	3	7	xxxxxxxxx		xxxxxxxxxxxxxxxxxxxxxxxx	xxxxxxxxxxxxxxxxxxxxxxxxxxxx	xxxxxxxxxxxxxxxxxxxxxxxxxxxxxxxxxxxxxxxxxxxxxx	xxxxxxxxxxxxxxxxxxxxxxxxxxxxxxx	xxxxxxxxxxxxxxxxxxxxxxxxxxxxxxxx
Bro1-6	4	4	3	2015-04-20	222	2015-05-08	254	2015-05-21	267	45
Bro1-6	4	6	7	2015-04-20	222	2015-05-21	267	2015-05-21	267	45
Bro1-6	5	1	9	2015-04-20	222	2015-05-08	254	2015-05-21	267	45
Bro1-6	5	2	1	2015-04-20	222	2015-05-08	254	2015-05-08	254	32
Bro1-6	5	2	4	2015-04-20	222	2015-05-21	267	2015-05-21	267	45
Bro1-6	5	3	5	2015-04-23	225	2015-05-08	254	2015-05-21	267	42
Bro1-6	5	3	6	2015-04-23	225	2015-05-08	254	2015-05-21	267	42
Bro1-6	5	3	7	2015-04-20	222	2015-05-08	254	2015-05-21	267	45
Bro1-6	5	4	5	2015-04-17	219	2015-05-08	254	2015-05-21	267	48
Bro1-6	6	1	3	2015-04-11	213	2015-05-02	248	2015-05-08	254	41
Bro1-6	6	2	9	2015-04-17	219	2015-05-02	248	2015-05-08	254	35
Bro1-6	6	5	5	2015-04-20	222	2015-05-08	254	2015-05-21	267	45
Bro1-6	6	6	6	2015-04-20	222	2015-05-08	254	2015-05-08	254	32
Bro1-6	6	6	8	2015-04-20	222	2015-05-08	254	2015-05-21	267	45
Edi-0	1	1	1	2015-04-14	216	2015-05-08	254	2015-05-21	267	51
Edi-0	1	1	7	2015-04-20	222	2015-05-21	267	2015-05-21	267	45
Edi-0	1	5	6	xxxxxxxxx		xxxxxxxxxxxxxxxxxxxxxxxx	xxxxxxxxxxxxxxxxxxxxxxxxxxxx	xxxxxxxxxxxxxxxxxxxxxxxxxxxxxxxxxxxxxxxxxxxxxx	xxxxxxxxxxxxxxxxxxxxxxxxxxxxxxx	xxxxxxxxxxxxxxxxxxxxxxxxxxxxxxxx
Edi-0	1	5	11	2015-04-14	216	2015-05-08	254	2015-05-08	254	38
Edi-0	1	6	3	2015-04-20	222	2015-05-21	267	2015-05-21	267	45
Edi-0	1	6	11	2015-04-20	222	2015-05-21	267	2015-05-21	267	45
Edi-0	2	1	2	2015-04-17	219	2015-05-08	254	2015-05-08	254	35
Edi-0	2	1	8	2015-04-20	222	2015-05-21	267	2015-05-21	267	45
Edi-0	2	1	11	xxxxxxxxx		xxxxxxxxxxxxxxxxxxxxxxxx	xxxxxxxxxxxxxxxxxxxxxxxxxxxx	xxxxxxxxxxxxxxxxxxxxxxxxxxxxxxxxxxxxxxxxxxxxxx	xxxxxxxxxxxxxxxxxxxxxxxxxxxxxxx	xxxxxxxxxxxxxxxxxxxxxxxxxxxxxxxx
Edi-0	2	2	8	xxxxxxxxx		xxxxxxxxxxxxxxxxxxxxxxxx	xxxxxxxxxxxxxxxxxxxxxxxxxxxx	xxxxxxxxxxxxxxxxxxxxxxxxxxxxxxxxxxxxxxxxxxxxxx	xxxxxxxxxxxxxxxxxxxxxxxxxxxxxxx	xxxxxxxxxxxxxxxxxxxxxxxxxxxxxxxx
Edi-0	2	4	2	xxxxxxxxx		xxxxxxxxxxxxxxxxxxxxxxxx	xxxxxxxxxxxxxxxxxxxxxxxxxxxx	xxxxxxxxxxxxxxxxxxxxxxxxxxxxxxxxxxxxxxxxxxxxxx	xxxxxxxxxxxxxxxxxxxxxxxxxxxxxxx	xxxxxxxxxxxxxxxxxxxxxxxxxxxxxxxx
Edi-0	2	4	4	xxxxxxxxx		xxxxxxxxxxxxxxxxxxxxxxxx	xxxxxxxxxxxxxxxxxxxxxxxxxxxx	xxxxxxxxxxxxxxxxxxxxxxxxxxxxxxxxxxxxxxxxxxxxxx	xxxxxxxxxxxxxxxxxxxxxxxxxxxxxxx	xxxxxxxxxxxxxxxxxxxxxxxxxxxxxxxx
Edi-0	3	2	6	xxxxxxxxx		xxxxxxxxxxxxxxxxxxxxxxxx	xxxxxxxxxxxxxxxxxxxxxxxxxxxx	xxxxxxxxxxxxxxxxxxxxxxxxxxxxxxxxxxxxxxxxxxxxxx	xxxxxxxxxxxxxxxxxxxxxxxxxxxxxxx	xxxxxxxxxxxxxxxxxxxxxxxxxxxxxxxx
Edi-0	3	2	11	xxxxxxxxx		xxxxxxxxxxxxxxxxxxxxxxxx	xxxxxxxxxxxxxxxxxxxxxxxxxxxx	xxxxxxxxxxxxxxxxxxxxxxxxxxxxxxxxxxxxxxxxxxxxxx	xxxxxxxxxxxxxxxxxxxxxxxxxxxxxxx	xxxxxxxxxxxxxxxxxxxxxxxxxxxxxxxx
Edi-0	3	5	1	2015-04-11	213	2015-05-08	254	2015-05-08	254	41
Edi-0	3	6	6	2015-04-17	219	2015-05-21	267	2015-05-21	267	48
Edi-0	4	1	4	2015-04-17	219	2015-05-21	267	2015-05-21	267	48
Edi-0	4	1	8	2015-04-17	219	2015-05-21	267	2015-05-08	254	35
Edi-0	4	2	4	2015-04-17	219	2015-05-08	254	2015-05-08	254	35
Edi-0	4	2	7	2015-04-17	219	2015-05-08	254	2015-05-21	267	48
Edi-0	4	2	10	2015-04-23	225	2015-05-21	267	2015-05-21	267	42
Edi-0	4	3	2	2015-04-17	219	2015-05-21	267	2015-05-21	267	48
Edi-0	4	3	3	2015-04-14	216	2015-05-02	248	2015-05-02	248	32
Edi-0	4	3	5	2015-04-20	222	2015-05-21	267	2015-05-21	267	45
Edi-0	4	3	6	2015-04-17	219	2015-05-21	267	2015-05-21	267	48
Edi-0	4	5	11	2015-04-17	219	2015-05-21	267	2015-05-08	254	35
Edi-0	5	1	7	2015-04-17	219	2015-05-08	254	2015-05-08	254	35
Edi-0	5	2	8	xxxxxxxxx		xxxxxxxxxxxxxxxxxxxxxxxx	xxxxxxxxxxxxxxxxxxxxxxxxxxxx	xxxxxxxxxxxxxxxxxxxxxxxxxxxxxxxxxxxxxxxxxxxxxx	xxxxxxxxxxxxxxxxxxxxxxxxxxxxxxx	xxxxxxxxxxxxxxxxxxxxxxxxxxxxxxxx
Edi-0	5	3	11	2015-04-17	219	2015-05-21	267	2015-05-21	267	48
Edi-0	5	4	9	xxxxxxxxx		xxxxxxxxxxxxxxxxxxxxxxxx	xxxxxxxxxxxxxxxxxxxxxxxxxxxx	xxxxxxxxxxxxxxxxxxxxxxxxxxxxxxxxxxxxxxxxxxxxxx	xxxxxxxxxxxxxxxxxxxxxxxxxxxxxxx	xxxxxxxxxxxxxxxxxxxxxxxxxxxxxxxx
Edi-0	6	1	6	2015-04-17	219	2015-05-08	254	2015-05-08	254	35
Edi-0	6	2	5	2015-04-14	216	2015-05-02	248	2015-05-02	248	32
Edi-0	6	2	7	2015-04-20	222	2015-05-08	254	2015-05-21	267	45
Edi-0	6	5	1	2015-04-14	216	2015-05-08	254	2015-05-08	254	38
Edi-0	6	5	3	2015-04-17	219	2015-05-08	254	2015-05-08	254	35
Edi-0	6	6	4	xxxxxxxxx		xxxxxxxxxxxxxxxxxxxxxxxx	xxxxxxxxxxxxxxxxxxxxxxxxxxxx	xxxxxxxxxxxxxxxxxxxxxxxxxxxxxxxxxxxxxxxxxxxxxx	xxxxxxxxxxxxxxxxxxxxxxxxxxxxxxx	xxxxxxxxxxxxxxxxxxxxxxxxxxxxxxxx
Löv-1	1	2	5	2015-04-14	216	2015-05-08	254	2015-05-08	254	38
Löv-1	1	2	10	2015-04-14	216	2015-05-08	254	2015-05-08	254	38
Löv-1	1	3	2	2015-04-14	216	2015-05-08	254	2015-05-08	254	38
Löv-1	1	5	2	2015-04-14	216	2015-05-08	254	2015-05-02	248	32
Löv-1	1	6	6	2015-04-11	213	2015-05-08	254	2015-05-08	254	41
Löv-1	2	1	1	2015-04-11	213	2015-05-08	254	2015-05-21	267	54
Löv-1	2	2	1	2015-04-14	216	2015-05-08	254	2015-05-08	254	38
Löv-1	2	2	10	2015-04-17	219	2015-05-08	254	2015-05-08	254	35
Löv-1	2	5	3	2015-04-23	225	2015-05-21	267	2015-05-21	267	42
Löv-1	3	2	9	2015-04-11	213	2015-04-29	245	2015-05-02	248	35
Löv-1	3	2	10	xxxxxxxxx		xxxxxxxxxxxxxxxxxxxxxxxx	xxxxxxxxxxxxxxxxxxxxxxxxxxxx	xxxxxxxxxxxxxxxxxxxxxxxxxxxxxxxxxxxxxxxxxxxxxx	xxxxxxxxxxxxxxxxxxxxxxxxxxxxxxx	xxxxxxxxxxxxxxxxxxxxxxxxxxxxxxxx
Löv-1	3	3	8	2015-04-17	219	2015-05-08	254	2015-05-08	254	35
Löv-1	3	3	10	xxxxxxxxx		xxxxxxxxxxxxxxxxxxxxxxxx	xxxxxxxxxxxxxxxxxxxxxxxxxxxx	xxxxxxxxxxxxxxxxxxxxxxxxxxxxxxxxxxxxxxxxxxxxxx	xxxxxxxxxxxxxxxxxxxxxxxxxxxxxxx	xxxxxxxxxxxxxxxxxxxxxxxxxxxxxxxx
Löv-1	3	3	11	2015-04-14	216	2015-05-21	267	2015-05-21	267	51
Löv-1	3	4	4	2015-04-14	216	2015-05-08	254	2015-05-08	254	38
Löv-1	3	4	9	xxxxxxxxx		xxxxxxxxxxxxxxxxxxxxxxxx	xxxxxxxxxxxxxxxxxxxxxxxxxxxx	xxxxxxxxxxxxxxxxxxxxxxxxxxxxxxxxxxxxxxxxxxxxxx	xxxxxxxxxxxxxxxxxxxxxxxxxxxxxxx	xxxxxxxxxxxxxxxxxxxxxxxxxxxxxxxx
Löv-1	3	5	4	2015-04-14	216	2015-05-21	267	2015-05-08	254	38
Löv-1	3	6	7	2015-04-14	216	2015-05-21	267	2015-05-08	254	38
Löv-1	4	1	3	2015-04-11	213	2015-05-02	248	2015-04-29	245	32
Löv-1	4	2	1	2015-04-17	219	2015-05-08	254	2015-05-08	254	35
Löv-1	4	5	2	2015-04-14	216	2015-05-21	267	2015-05-21	267	51
Löv-1	4	5	5	2015-04-17	219	2015-05-21	267	2015-05-21	267	48
Löv-1	4	6	9	2015-04-11	213	2015-05-08	254	2015-05-02	248	35
Löv-1	5	2	3	2015-04-11	213	2015-05-08	254	2015-05-08	254	41
Löv-1	5	3	4	2015-04-11	213	2015-05-08	254	2015-05-08	254	41
Löv-1	5	5	11	2015-04-11	213	2015-05-08	254	2015-05-21	267	54
Löv-1	6	1	1	2015-04-11	213	2015-04-29	245	2015-04-26	242	29
Löv-1	6	1	11	2015-04-11	213	2015-05-02	248	2015-05-02	248	35
Löv-1	6	3	5	2015-04-11	213	2015-05-08	254	2015-05-08	254	41
Löv-1	6	4	2	2015-04-11	213	2015-05-02	248	2015-05-08	254	41
Löv-1	6	4	7	2015-04-14	216	2015-05-08	254	2015-05-08	254	38
Löv-1	6	5	4	2015-04-14	216	2015-05-08	254	2015-05-08	254	38
Löv-1	6	5	10	2015-04-14	216	2015-05-08	254	2015-05-08	254	38
Löv-1	6	5	11	2015-04-14	216	2015-05-08	254	2015-05-08	254	38
Löv-1	6	6	2	2015-04-11	213	2015-05-08	254	2015-05-02	248	35
Löv-1	6	6	9	2015-04-14	216	2015-05-08	254	2015-05-08	254	38
Ull2-5	1	2	4	2015-04-20	222	dry-dying 21 may (1 cm)		no white
Ull2-5	1	2	6	xxxxxxxxx		xxxxxxxxxxxxxxxxxxxxxxxx	xxxxxxxxxxxxxxxxxxxxxxxxxxxx	xxxxxxxxxxxxxxxxxxxxxxxxxxxxxxxxxxxxxxxxxxxxxx	xxxxxxxxxxxxxxxxxxxxxxxxxxxxxxx	xxxxxxxxxxxxxxxxxxxxxxxxxxxxxxxx
Ull2-5	1	3	7	2015-04-20	222	2015-05-08	254	2015-05-21	267	45
Ull2-5	1	3	11	2015-04-20	222	2015-05-08	254	2015-05-21	267	45
Ull2-5	1	4	7	2015-04-20	222	2015-05-21	267	2015-05-21	267	45
Ull2-5	1	5	3	2015-04-20	222	2015-05-21	267	2015-05-21	267	45
Ull2-5	1	5	8	2015-04-20	222	2015-05-08	254	2015-05-08	254	32
Ull2-5	2	1	9	2015-04-29	231	2015-05-21	267	2015-05-21	267	36
Ull2-5	2	1	10	2015-04-23	225	2015-05-21	267	2015-05-21	267	42
Ull2-5	2	2	9	2015-04-26	228	2015-05-21	267	no white
Ull2-5	2	6	11	2015-04-20	222	2015-05-21	267	2015-05-21	267	45
Ull2-5	3	1	3	2015-04-17	219	2015-05-21	267	2015-05-08	254	35
Ull2-5	3	2	4	2015-04-14	216	2015-05-08	254	2015-05-02	248	32
Ull2-5	3	2	8	2015-04-17	219	2015-05-08	254	2015-05-02	248	29
Ull2-5	3	3	1	2015-04-20	222	2015-05-21	267	2015-05-08	254	32
Ull2-5	3	4	1	2015-04-14	216	2015-05-08	254	2015-05-08	254	38
Ull2-5	3	5	2	2015-04-20	222	2015-05-21	267	2015-05-21	267	45
Ull2-5	3	6	8	2015-04-20	222	2015-05-08	254	2015-05-08	254	32
Ull2-5	4	1	11	2015-04-17	219	2015-05-21	267	2015-05-21	267	48
Ull2-5	4	5	8	2015-04-20	222	2015-05-08	254	2015-05-08	254	32
Ull2-5	4	6	1	2015-04-11	213	2015-05-02	248	2015-04-29	245	32
Ull2-5	4	6	8	2015-04-17	219	2015-05-21	267	2015-05-08	254	35
Ull2-5	5	2	5	2015-04-20	222	2015-05-21	267	2015-05-21	267	45
Ull2-5	5	3	8	2015-04-17	219	2015-05-08	254	2015-05-21	267	48
Ull2-5	5	3	9	2015-04-23	225	2015-05-21	267	2015-05-21	267	42
Ull2-5	5	4	2	xxxxxxxxx		xxxxxxxxxxxxxxxxxxxxxxxx	xxxxxxxxxxxxxxxxxxxxxxxxxxxx	xxxxxxxxxxxxxxxxxxxxxxxxxxxxxxxxxxxxxxxxxxxxxx	xxxxxxxxxxxxxxxxxxxxxxxxxxxxxxx	xxxxxxxxxxxxxxxxxxxxxxxxxxxxxxxx
Ull2-5	5	4	11	2015-04-17	219	2015-05-08	254	2015-05-21	267	48
Ull2-5	5	6	6	2015-04-20	222	2015-05-08	254	2015-05-21	267	45
Ull2-5	5	6	7	2015-04-20	222	2015-05-21	267	2015-05-21	267	45
Ull2-5	6	1	10	2015-04-14	216	2015-05-08	254	2015-05-02	248	32
Ull2-5	6	2	3	2015-04-11	213	2015-05-02	248	2015-04-26	242	29
Ull2-5	6	3	8	2015-04-20	222	dry-dying 21 may (1 cm)		no white
Ull2-5	6	4	3	2015-04-23	225	2015-05-21	267	2015-05-21	267	42
Ull2-5	6	4	8	2015-04-23	225	2015-05-21	267	2015-05-21	267	42
Ull2-5	6	5	2	2015-04-17	219	2015-05-08	254	2015-05-08	254	35
Ull2-5	6	5	6	2015-04-23	225	2015-05-21	267	2015-05-21	267	42
Var2-6	1	1	8	2015-04-14	216	dry-dying 21 may (1 cm)		2015-05-08	254	38
Var2-6	1	2	3	2015-04-20	222	2015-05-21	267	2015-05-21	267	45
Var2-6	1	3	10	2015-04-17	219	2015-05-21	267	2015-05-08	254	35
Var2-6	1	4	2	2015-04-17	219	2015-05-21	267	2015-05-02	248	29
Var2-6	1	6	5	2015-04-23	225	2015-05-21	267	2015-05-21	267	42
Var2-6	1	6	8	2015-04-14	216	2015-05-21	267	2015-05-08	254	38
Var2-6	1	6	9	2015-04-14	216	2015-05-21	267	2015-05-02	248	32
Var2-6	2	1	4	2015-04-20	222	dry-dying 21 may (1 cm)		no white
Var2-6	2	3	6	2015-04-20	222	2015-05-21	267	2015-05-21	267	45
Var2-6	2	3	10	2015-04-20	222	2015-05-21	267	2015-05-08	254	32
Var2-6	2	4	10	2015-04-14	216	2015-05-21	267	2015-05-02	248	32
Var2-6	2	5	4	xxxxxxxxx		xxxxxxxxxxxxxxxxxxxxxxxx	xxxxxxxxxxxxxxxxxxxxxxxxxxxx	xxxxxxxxxxxxxxxxxxxxxxxxxxxxxxxxxxxxxxxxxxxxxx	xxxxxxxxxxxxxxxxxxxxxxxxxxxxxxx	xxxxxxxxxxxxxxxxxxxxxxxxxxxxxxxx
Var2-6	2	5	6	2015-04-20	222	2015-05-21	267	2015-05-21	267	45
Var2-6	3	1	7	2015-04-14	216	2015-05-21	267	2015-05-08	254	38
Var2-6	3	1	9	2015-04-14	216	2015-05-21	267	2015-05-08	254	38
Var2-6	3	3	3	2015-04-11	213	2015-05-21	267	2015-05-02	248	35
Var2-6	3	3	4	2015-04-14	216	2015-05-21	267	2015-05-02	248	32
Var2-6	3	4	10	2015-04-20	222	2015-05-21	267	2015-05-21	267	45
Var2-6	3	5	6	2015-04-11	213	2015-05-21	267	2015-04-29	245	32
Var2-6	3	6	5	2015-04-17	219	2015-05-21	267	2015-05-08	254	35
Var2-6	4	1	7	2015-04-17	219	2015-05-21	267	2015-05-02	248	29
Var2-6	4	1	10	2015-04-14	216	2015-05-21	267	2015-04-29	245	29
Var2-6	4	4	1	2015-04-17	219	dead 21 may (before +3 cm)		2015-05-02	248	29
Var2-6	4	4	11	2015-04-14	216	2015-05-21	267	2015-05-21	267	51
Var2-6	4	5	3	2015-04-17	219	2015-05-21	267	2015-05-08	254	35
Var2-6	5	1	4	2015-04-20	222	dry-dying 21 may (1 cm)		no white
Var2-6	5	1	5	2015-04-17	219	dry-dying 21 may (1 cm)		no white
Var2-6	5	2	7	2015-04-11	213	2015-05-21	267	2015-05-02	248	35
Var2-6	5	4	1	2015-04-14	216	dry-dying 21 may (1 cm)		2015-05-08	254	38
Var2-6	5	5	1	2015-04-11	213	2015-05-21	267	2015-05-02	248	35
Var2-6	5	6	10	2015-04-17	219	2015-05-21	267	2015-05-08	254	35
Var2-6	6	2	2	2015-04-11	213	2015-05-21	267	2015-04-23	239	26
Var2-6	6	3	4	2015-04-17	219	2015-05-21	267	2015-05-08	254	35
Var2-6	6	3	9	2015-04-17	219	2015-05-21	267	2015-05-02	248	29
Var2-6	6	4	4	2015-04-14	216	2015-05-21	267	2015-05-08	254	38
Var2-6	6	4	10	2015-04-17	219	2015-05-21	267	2015-05-08	254	35

## Sheet: South Sweden 2014-15 flowering
Code	Tray	Row	Position	Days from sowing to budding	Days from sowing to +3 cm stalk	Days from sowing to first petals	Information: Red=dead before buding, Red and "?"=dead after budding	Date of budding
Bro 1-6	1	2	9	203	212	215	Date of sowing	2015-04-15
Bro 1-6	1	5	5	194	209	209	2014-09-24	2015-04-06
Bro 1-6	2	1	6					2014-09-24
Bro 1-6	2	2	8	212	221	221		2015-04-24
Bro 1-6	2	3	3	194	206	209		2015-04-06
Bro 1-6	2	3	11					2014-09-24
Bro 1-6	2	4	6					2014-09-24
Bro 1-6	2	6	2					2014-09-24
Bro 1-6	2	6	9	200	212	212		2015-04-12
Bro 1-6	3	1	11					2014-09-24
Bro 1-6	3	2	5	197	212	212		2015-04-09
Bro 1-6	3	2	10	200	209	212		2015-04-12
Bro 1-6	3	4	11	194	209	209		2015-04-06
Bro 1-6	4	2	4	194	209	212		2015-04-06
Bro 1-6	5	1	3					2014-09-24
Bro 1-6	5	2	3	200	212	209		2015-04-12
Bro 1-6	5	2	6	200	212	212		2015-04-12
Bro 1-6	5	2	8	194	209	212		2015-04-06
Bro 1-6	5	2	9	209	215	221		2015-04-21
Bro 1-6	5	3	4	194	209	209		2015-04-06
Bro 1-6	5	3	11	194	209	grazed before petals		2015-04-06
Bro 1-6	5	4	2	194	206	209		2015-04-06
Bro 1-6	5	4	11	194	209	209		2015-04-06
Bro 1-6	5	5	1	194	212	212		2015-04-06
Bro 1-6	5	6	4					2014-09-24
Bro 1-6	5	6	8					2014-09-24
Bro 1-6	6	1	3					2014-09-24
Bro 1-6	6	2	7					2014-09-24
Bro 1-6	6	3	7					2014-09-24
Bro 1-6	6	4	1					2014-09-24
Bro 1-6	6	4	2					2014-09-24
Bro 1-6	6	4	6					2014-09-24
Bro 1-6	6	5	8	209	218	218		2015-04-21
Bro 1-6	6	5	10					2014-09-24
Bro 1-6	6	6	4					2014-09-24
Bro 1-6	6	6	7					2014-09-24
Col FRI(sf2)	1	2	1	185	206	206		2015-03-28
Col FRI(sf2)	1	2	3	203	215	218		2015-04-15
Col FRI(sf2)	1	2	8	188	206	209		2015-03-31
Col FRI(sf2)	1	3	10	185	212	209		2015-03-28
Col FRI(sf2)	1	6	5	191	209	206		2015-04-03
Col FRI(sf2)	1	6	8	185	203	206		2015-03-28
Col FRI(sf2)	2	1	11					2014-09-24
Col FRI(sf2)	2	3	8					2014-09-24
Col FRI(sf2)	2	4	8					2014-09-24
Col FRI(sf2)	2	5	3					2014-09-24
Col FRI(sf2)	2	6	8	203	212	212		2015-04-15
Col FRI(sf2)	3	3	6	185	203	203		2015-03-28
Col FRI(sf2)	3	4	8	185	203	206		2015-03-28
Col FRI(sf2)	3	4	9	188	206	209		2015-03-31
Col FRI(sf2)	3	4	10					2014-09-24
Col FRI(sf2)	3	5	8	185	203	203		2015-03-28
Col FRI(sf2)	3	6	2	185	209	203		2015-03-28
Col FRI(sf2)	3	6	10					2014-09-24
Col FRI(sf2)	4	1	4	185	209	209		2015-03-28
Col FRI(sf2)	4	1	6	185	206	206		2015-03-28
Col FRI(sf2)	4	1	10					2014-09-24
Col FRI(sf2)	4	2	11					2014-09-24
Col FRI(sf2)	4	6	11	185	212	206		2015-03-28
Col FRI(sf2)	5	3	7	185	203	206		2015-03-28
Col FRI(sf2)	5	3	8	191	209	206		2015-04-03
Col FRI(sf2)	5	4	9	185	203	203		2015-03-28
Col FRI(sf2)	5	5	5	184	203	203		2015-03-27
Col FRI(sf2)	5	6	2	185	206	203		2015-03-28
Col FRI(sf2)	6	1	8	203	212	215		2015-04-15
Col FRI(sf2)	6	2	2					2014-09-24
Col FRI(sf2)	6	2	6	185	203	206		2015-03-28
Col FRI(sf2)	6	3	2					2014-09-24
Col FRI(sf2)	6	3	3					2014-09-24
Col FRI(sf2)	6	3	4					2014-09-24
Col FRI(sf2)	6	4	7					2014-09-24
Col FRI(sf2)	6	4	8					2014-09-24
Col-O	1	1	2	183	200	200		2015-03-26
Col-O	1	2	2	185	206	206		2015-03-28
Col-O	1	3	6	191	206	209		2015-04-03
Col-O	1	4	3	191	209	206		2015-04-03
Col-O	1	5	2	185	206	209		2015-03-28
Col-O	1	6	11	191	212	212		2015-04-03
Col-O	2	2	3					2014-09-24
Col-O	2	4	2					2014-09-24
Col-O	2	4	5	185	209	209		2015-03-28
Col-O	3	3	9	185	203	203		2015-03-28
Col-O	3	4	2	185	206	206		2015-03-28
Col-O	3	4	4					2014-09-24
Col-O	3	4	5					2014-09-24
Col-O	3	4	6	185	209	206		2015-03-28
Col-O	3	4	7	185	209	209		2015-03-28
Col-O	3	5	3	183	200	200		2015-03-26
Col-O	4	1	1	185	203	206		2015-03-28
Col-O	4	2	3	185	200	206		2015-03-28
Col-O	4	2	7					2014-09-24
Col-O	4	3	10	184	203	203		2015-03-27
Col-O	4	3	11	188	212	212		2015-03-31
Col-O	4	4	7	185	200	206		2015-03-28
Col-O	4	5	3	183	200	203		2015-03-26
Col-O	5	3	5	185	200	206		2015-03-28
Col-O	5	3	10	184	200	203		2015-03-27
Col-O	5	4	3	191	203	209		2015-04-03
Col-O	5	4	4	185	200	203		2015-03-28
Col-O	5	6	6	185	209	206		2015-03-28
Col-O	6	1	2					2014-09-24
Col-O	6	2	1					2014-09-24
Col-O	6	3	5					2014-09-24
Col-O	6	3	9	200	212	212		2015-04-12
Col-O	6	5	7					2014-09-24
Col-O	6	5	11	194	209	206		2015-04-06
Col-O	6	6	1					2014-09-24
Col-O	6	6	6					2014-09-24
Edi-O	1	1	5	184	212	212		2015-03-27
Edi-O	1	2	5	185	212	212		2015-03-28
Edi-O	1	2	6	197	212	212		2015-04-09
Edi-O	1	4	1					2014-09-24
Edi-O	1	4	6					2014-09-24
Edi-O	1	6	3					2014-09-24
Edi-O	2	1	1					2014-09-24
Edi-O	2	1	7					2014-09-24
Edi-O	2	1	10					2014-09-24
Edi-O	2	2	6					2014-09-24
Edi-O	2	3	7					2014-09-24
Edi-O	2	4	11					2014-09-24
Edi-O	2	5	11					2014-09-24
Edi-O	2	6	5	203	215	215		2015-04-15
Edi-O	3	1	10	185	209	203		2015-03-28
Edi-O	3	2	4	194	212	212		2015-04-06
Edi-O	3	3	1					2014-09-24
Edi-O	3	3	8	218	227	230		2015-04-30
Edi-O	4	2	2					2014-09-24
Edi-O	4	2	8					2014-09-24
Edi-O	4	4	4	206	215	215		2015-04-18
Edi-O	4	5	10	191	212	212		2015-04-03
Edi-O	4	6	5					2014-09-24
Edi-O	5	1	8	194	209	209		2015-04-06
Edi-O	5	2	1	191	209	209		2015-04-03
Edi-O	5	2	4					2014-09-24
Edi-O	5	2	5	194	209	212		2015-04-06
Edi-O	5	2	11	191	212	212		2015-04-03
Edi-O	5	4	5					2014-09-24
Edi-O	6	1	11					2014-09-24
Edi-O	6	2	4					2014-09-24
Edi-O	6	4	4					2014-09-24
Edi-O	6	4	11					2014-09-24
Edi-O	6	5	4	212	221	215		2015-04-24
Edi-O	6	5	9	203	218	215		2015-04-15
Edi-O	6	6	9					2014-09-24
empty	1	1	7					2014-09-24
empty	1	1	8					2014-09-24
empty	1	2	7					2014-09-24
empty	1	3	2					2014-09-24
empty	1	3	5					2014-09-24
empty	1	3	8					2014-09-24
empty	1	4	8					2014-09-24
empty	1	4	10					2014-09-24
empty	1	5	3					2014-09-24
empty	1	5	8					2014-09-24
empty	1	5	10					2014-09-24
empty	1	5	11					2014-09-24
empty	1	6	2					2014-09-24
empty	1	6	4					2014-09-24
empty	1	6	10					2014-09-24
empty	2	1	8					2014-09-24
empty	2	3	9					2014-09-24
empty	2	4	1					2014-09-24
empty	2	5	1					2014-09-24
empty	2	5	2					2014-09-24
empty	2	5	4					2014-09-24
empty	2	5	6					2014-09-24
empty	2	5	9					2014-09-24
empty	2	6	4					2014-09-24
empty	2	6	10					2014-09-24
empty	3	2	8					2014-09-24
empty	3	3	4					2014-09-24
empty	3	3	11					2014-09-24
empty	3	4	3					2014-09-24
empty	3	5	1					2014-09-24
empty	3	5	6					2014-09-24
empty	3	6	1					2014-09-24
empty	3	6	4					2014-09-24
empty	3	6	5					2014-09-24
empty	3	6	9					2014-09-24
empty	4	1	3					2014-09-24
empty	4	3	2					2014-09-24
empty	4	3	3					2014-09-24
empty	4	3	8					2014-09-24
empty	4	3	9					2014-09-24
empty	4	4	5					2014-09-24
empty	4	4	9					2014-09-24
empty	4	4	11					2014-09-24
empty	4	5	8					2014-09-24
empty	5	1	2					2014-09-24
empty	5	1	4					2014-09-24
empty	5	1	5					2014-09-24
empty	5	1	7					2014-09-24
empty	5	1	10					2014-09-24
empty	5	1	11					2014-09-24
empty	5	3	3					2014-09-24
empty	5	3	6					2014-09-24
empty	5	3	9					2014-09-24
empty	5	4	1					2014-09-24
empty	5	4	10					2014-09-24
empty	5	5	2					2014-09-24
empty	5	5	3					2014-09-24
empty	5	5	4					2014-09-24
empty	5	5	7					2014-09-24
empty	5	5	8					2014-09-24
empty	5	5	9					2014-09-24
empty	5	5	10					2014-09-24
empty	5	5	11					2014-09-24
empty	5	6	5					2014-09-24
empty	5	6	7					2014-09-24
empty	6	1	1					2014-09-24
empty	6	1	4					2014-09-24
empty	6	1	9					2014-09-24
empty	6	2	10					2014-09-24
empty	6	3	1					2014-09-24
empty	6	3	6					2014-09-24
empty	6	5	5					2014-09-24
Lov intro	1	1	4	191	209	209		2015-04-03
Lov intro	1	1	6	184	206	209		2015-03-27
Lov intro	1	1	10	185	209	209		2015-03-28
Lov intro	1	2	4	203	212	212		2015-04-15
Lov intro	1	3	1	212	218	227		2015-04-24
Lov intro	1	3	4					2014-09-24
Lov intro	1	3	7	185	212	209		2015-03-28
Lov intro	1	6	9					2014-09-24
Lov intro	2	1	2					2014-09-24
Lov intro	2	2	1					2014-09-24
Lov intro	2	3	4	185	209	209		2015-03-28
Lov intro	2	5	10	185	203	203		2015-03-28
Lov intro	3	1	3	185	203	209		2015-03-28
Lov intro	3	1	4					2014-09-24
Lov intro	3	1	8	185	206	206		2015-03-28
Lov intro	3	2	1	215	?	?		2015-04-27
Lov intro	3	3	10	191	209	209		2015-04-03
Lov intro	3	5	4					2014-09-24
Lov intro	3	5	7	185	209	206		2015-03-28
Lov intro	3	6	6	185	209	209		2015-03-28
Lov intro	3	6	7					2014-09-24
Lov intro	4	2	10	188	209	209		2015-03-31
Lov intro	4	4	3					2014-09-24
Lov intro	4	5	5	185	203	206		2015-03-28
Lov intro	4	6	2	185	203	203		2015-03-28
Lov intro	4	6	3	185	212	215		2015-03-28
Lov intro	4	6	7	185	206	206		2015-03-28
Lov intro	5	2	2	191	209	209		2015-04-03
Lov intro	5	6	9	185	212	218		2015-03-28
Lov intro	6	1	6	203	212	212		2015-04-15
Lov intro	6	1	7					2014-09-24
Lov intro	6	2	8					2014-09-24
Lov intro	6	3	8	197	209	212		2015-04-09
Lov intro	6	4	10	206	215	215		2015-04-18
Lov intro	6	6	5					2014-09-24
Lov intro	6	6	10					2014-09-24
Lov-1	1	1	11					2014-09-24
Lov-1	1	4	7					2014-09-24
Lov-1	1	6	6					2014-09-24
Lov-1	1	6	7					2014-09-24
Lov-1	2	1	3					2014-09-24
Lov-1	2	2	4	191	212	212		2015-04-03
Lov-1	2	2	10					2014-09-24
Lov-1	2	3	2	188	209	209		2015-03-31
Lov-1	2	3	5	185	209	209		2015-03-28
Lov-1	2	4	9	185	206	209		2015-03-28
Lov-1	2	5	8					2014-09-24
Lov-1	2	6	1	186	209	212		2015-03-29
Lov-1	2	6	6	209	221	227		2015-04-21
Lov-1	3	1	7					2014-09-24
Lov-1	3	4	1	185	215	218		2015-03-28
Lov-1	3	5	2	194	212	212		2015-04-06
Lov-1	3	6	8	191	212	209		2015-04-03
Lov-1	4	1	8	188	212	212		2015-03-31
Lov-1	4	1	11					2014-09-24
Lov-1	4	3	4	185	212	209		2015-03-28
Lov-1	4	3	7	188	212	209		2015-03-31
Lov-1	4	4	2	185	212	209		2015-03-28
Lov-1	4	6	6					2014-09-24
Lov-1	4	6	9	188	209	209		2015-03-31
Lov-1	4	6	10					2014-09-24
Lov-1	5	1	9					2014-09-24
Lov-1	5	2	7	185	206	209		2015-03-28
Lov-1	5	3	1	184	203	203		2015-03-27
Lov-1	5	4	7	206	215	215		2015-04-18
Lov-1	5	6	3	185	212	209		2015-03-28
Lov-1	5	6	10	185	212	206		2015-03-28
Lov-1	6	2	3					2014-09-24
Lov-1	6	3	10	212	218	227		2015-04-24
Lov-1	6	3	11	194	215	212		2015-04-06
Lov-1	6	4	3					2014-09-24
Lov-1	6	5	1	206	215	215		2015-04-18
LovA	1	1	3	188	212	212		2015-03-31
LovA	1	2	10	197	212	212		2015-04-09
LovA	1	2	11					2014-09-24
LovA	1	4	4					2014-09-24
LovA	1	5	1					2014-09-24
LovA	1	5	4	183	200	203		2015-03-26
LovA	1	5	9	184	203	203		2015-03-27
LovA	1	6	1	188	212	209		2015-03-31
LovA	2	1	5	212	?	?		2015-04-24
LovA	2	1	9					2014-09-24
LovA	2	4	3	206	215	215		2015-04-18
LovA	2	4	10	194	206	209		2015-04-06
LovA	2	5	5					2014-09-24
LovA	2	6	3					2014-09-24
LovA	2	6	7	194	203	209		2015-04-06
LovA	2	6	11	206	218	215		2015-04-18
LovA	3	1	6	194	221	221		2015-04-06
LovA	3	2	2	203	215	215		2015-04-15
LovA	3	2	6	185	203	206		2015-03-28
LovA	3	2	11	184	203	206		2015-03-27
LovA	3	3	3	185	203	206		2015-03-28
LovA	3	3	5					2014-09-24
LovA	3	3	7	184	200	203		2015-03-27
LovA	4	3	6	185	203	206		2015-03-28
LovA	4	4	8					2014-09-24
LovA	4	5	4	185	203	206		2015-03-28
LovA	4	5	11	188	209	206		2015-03-31
LovA	5	3	2	206	212	221		2015-04-18
LovA	5	4	6	197	209	209		2015-04-09
LovA	5	5	6	197	212	209		2015-04-09
LovA	6	1	5					2014-09-24
LovA	6	2	5	203	215	212		2015-04-15
LovA	6	2	11					2014-09-24
LovA	6	6	2					2014-09-24
LovA	6	6	3					2014-09-24
LovA	6	6	11					2014-09-24
Ull 2-5	1	1	1	188	212	209		2015-03-31
Ull 2-5	1	1	9	185	212	209		2015-03-28
Ull 2-5	1	3	3					2014-09-24
Ull 2-5	1	5	7	185	209	209		2015-03-28
Ull 2-5	2	1	4					2014-09-24
Ull 2-5	2	2	7					2014-09-24
Ull 2-5	2	2	9					2014-09-24
Ull 2-5	2	3	6	188	212	209		2015-03-31
Ull 2-5	2	4	4					2014-09-24
Ull 2-5	2	4	7					2014-09-24
Ull 2-5	2	5	7					2014-09-24
Ull 2-5	3	1	2	218	230	230		2015-04-30
Ull 2-5	3	2	9					2014-09-24
Ull 2-5	3	3	2					2014-09-24
Ull 2-5	3	5	5	215	?	?		2015-04-27
Ull 2-5	3	5	9	188	212	206		2015-03-31
Ull 2-5	3	5	10					2014-09-24
Ull 2-5	3	6	11					2014-09-24
Ull 2-5	4	1	2	194	212	212		2015-04-06
Ull 2-5	4	1	7	212	227	230		2015-04-24
Ull 2-5	4	1	9	191	212	212		2015-04-03
Ull 2-5	4	2	5					2014-09-24
Ull 2-5	4	3	1					2014-09-24
Ull 2-5	4	4	1					2014-09-24
Ull 2-5	4	5	2	203	218	215		2015-04-15
Ull 2-5	4	5	6					2014-09-24
Ull 2-5	4	5	9	194	212	212		2015-04-06
Ull 2-5	4	6	1					2014-09-24
Ull 2-5	5	1	1					2014-09-24
Ull 2-5	5	1	6					2014-09-24
Ull 2-5	5	2	10	209	215	218		2015-04-21
Ull 2-5	5	4	8	218	?	?		2015-04-30
Ull 2-5	6	2	9					2014-09-24
Ull 2-5	6	5	2					2014-09-24
Ull 2-5	6	5	3					2014-09-24
Ull 2-5	6	5	6					2014-09-24
Var 2-6	1	3	9					2014-09-24
Var 2-6	1	3	11					2014-09-24
Var 2-6	1	4	2	191	215	209		2015-04-03
Var 2-6	1	4	5					2014-09-24
Var 2-6	1	4	9					2014-09-24
Var 2-6	1	4	11	185	212	209		2015-03-28
Var 2-6	1	5	6	194	212	209		2015-04-06
Var 2-6	2	2	2	194	212	209		2015-04-06
Var 2-6	2	2	5					2014-09-24
Var 2-6	2	2	11					2014-09-24
Var 2-6	2	3	1					2014-09-24
Var 2-6	2	3	10					2014-09-24
Var 2-6	3	1	1					2014-09-24
Var 2-6	3	1	5	185	218	209		2015-03-28
Var 2-6	3	1	9	185	212	203		2015-03-28
Var 2-6	3	2	3	188	212	209		2015-03-31
Var 2-6	3	2	7	185	212	209		2015-03-28
Var 2-6	3	5	11					2014-09-24
Var 2-6	3	6	3	188	212	209		2015-03-31
Var 2-6	4	1	5					2014-09-24
Var 2-6	4	2	1					2014-09-24
Var 2-6	4	2	6	187	212	209		2015-03-30
Var 2-6	4	2	9	215	?	?		2015-04-27
Var 2-6	4	3	5	188	215	209		2015-03-31
Var 2-6	4	4	6	206	218	215		2015-04-18
Var 2-6	4	4	10	215	227	221		2015-04-27
Var 2-6	4	5	1	194	215	209		2015-04-06
Var 2-6	4	5	7					2014-09-24
Var 2-6	4	6	4	191	215	212		2015-04-03
Var 2-6	4	6	8	194	215	209		2015-04-06
Var 2-6	5	6	1	185	212	209		2015-03-28
Var 2-6	5	6	11	185	212	209		2015-03-28
Var 2-6	6	1	10	215	227	227		2015-04-27
Var 2-6	6	4	5	209	227	215		2015-04-21
Var 2-6	6	4	9	203	215	212		2015-04-15
Var 2-6	6	6	8					2014-09-24
