# Supplementary material for: Natural variation in autumn expression is the major adaptive determinant distinguishing Arabidopsis FLC haplotypes
Source: eLife. 2020 Sep 9;9:e57671. doi: 10.7554/eLife.57671 (PMC7518893; doi:10.7554/eLife.57671)
Supplement: Source data 5. [file elife-57671-data5.xlsx]

## Sheet: Key
Genotype
BRO	Bro1-6
BRON	Bro NIL
COL	Col-0
EDI	Edi-0
EDIN	Edi NIL
FCAF	fca-9 FRI
FLDF	fld-4 FRI
FVEF	fve-3 FRI
LHP	lhp1-3 FRI
LOV	Löv-1
NDX	ndx1-1 FRI
NIL1	Lov NIL1
NIL2	Lov NIL2
SDG8	sdg8 FRI
SF2	Col FRI
ULL	Ull2-5
ULLN	Ull NIL
VAL	val1-2 FRI
VAR	Var2-6
VARN	Var NIL
VIN3	vin3-4 FRI
VIN3-1	vin3-1 FRI
VRN1	vrn1-4 FRI
VRN2	vrn2-1 FRI

## Sheet: Norwich flowering transfers
Tray No:	Move date	Row	Column	Flowering date	Genotype	Flowering from move
4	2016-10-21	1	1	x	3		x	dead
10	2016-10-21	1	1	2016-11-18	EDI	28	1, 2, 3, 4	empty cells
16	2016-10-21	1	1	x	1
22	2016-10-21	1	1	2016-11-09	COL	19
28	2016-10-21	1	1	2017-02-14	LOV	116
34	2016-10-21	1	1	dead	VRN2
4	2016-10-21	2	1	2016-11-21	EFS	31
10	2016-10-21	2	1	x	LOV
16	2016-10-21	2	1	x	3
22	2016-10-21	2	1	dead	NIL1
28	2016-10-21	2	1	2016-12-16	FVEF	56
34	2016-10-21	2	1	2016-11-17	LHP	27
4	2016-10-21	3	1	x	VAR
10	2016-10-21	3	1	2016-12-26	NIL1	66
16	2016-10-21	3	1
22	2016-10-21	3	1	2017-01-20	VRN5	91
28	2016-10-21	3	1
34	2016-10-21	3	1	2017-01-05	NIL1	76
4	2016-10-21	4	1	2016-12-12	COL	52
10	2016-10-21	4	1	2016-12-09	FVEF	49
16	2016-10-21	4	1	2016-11-09	flc2	19
22	2016-10-21	4	1	2016-11-21	NDX	31
28	2016-10-21	4	1	2017-01-30	VRN2	101
34	2016-10-21	4	1	2016-12-21	FVEF	61
4	2016-10-21	5	1	x	1
10	2016-10-21	5	1	2016-11-03	EFS	13
16	2016-10-21	5	1
22	2016-10-21	5	1	2016-12-26	ULL	66
28	2016-10-21	5	1	2016-12-28	ULL	68
34	2016-10-21	5	1
4	2016-10-21	6	1	2016-11-23	NDX	33
10	2016-10-21	6	1	2016-12-07	VIN3-1	47
16	2016-10-21	6	1	2017-01-16	NIL1	87
22	2016-10-21	6	1	2016-11-15	LHP	25
28	2016-10-21	6	1	2017-01-05	FLDF	76
34	2016-10-21	6	1	2016-11-28	EDIN	38
4	2016-10-21	7	1	2016-12-05	FCAF	45
10	2016-10-21	7	1	2016-12-09	NIL2	49
16	2016-10-21	7	1	2016-12-26	ULL	66
22	2016-10-21	7	1	x	2
28	2016-10-21	7	1	2016-11-23	EDI	33
34	2016-10-21	7	1	2016-12-12	BRON	52
4	2016-10-21	8	1	2016-12-16	VIN3	56
10	2016-10-21	8	1	2017-01-05	ULL	76
16	2016-10-21	8	1	2016-11-25	SF2	35
22	2016-10-21	8	1	x	4
28	2016-10-21	8	1
34	2016-10-21	8	1	2017-01-05	ULL	76
4	2016-10-21	9	1	2016-11-19	EDI	29
10	2016-10-21	9	1	2017-02-28	VRN5	130
16	2016-10-21	9	1	2016-12-14	VIN3	54
22	2016-10-21	9	1
28	2016-10-21	9	1	x	4
34	2016-10-21	9	1	2017-03-10	VRN5	140
4	2016-10-21	10	1	x	NIL1
10	2016-10-21	10	1	x	3
16	2016-10-21	10	1	x	4
22	2016-10-21	10	1	2017-01-23	VAR	94
28	2016-10-21	10	1	x	2
34	2016-10-21	10	1	2017-03-31	flc2	161
4	2016-10-21	11	1	2016-12-14	FLDF	54
10	2016-10-21	11	1	2016-11-21	LHP	31
16	2016-10-21	11	1	x	2
22	2016-10-21	11	1
28	2016-10-21	11	1	2016-12-05	FCAF	45
34	2016-10-21	11	1	2016-12-19	VARN	59
4	2016-10-21	1	2	2016-12-05	SF2	45
10	2016-10-21	1	2	x	2
16	2016-10-21	1	2	2016-11-25	ULLN	35
22	2016-10-21	1	2	2016-11-03	EFS	13
28	2016-10-21	1	2	2016-12-05	NDX	45
34	2016-10-21	1	2	dead	VAL
4	2016-10-21	2	2
10	2016-10-21	2	2
16	2016-10-21	2	2	2016-11-28	NDX	38
22	2016-10-21	2	2	2016-12-09	FVEF	49
28	2016-10-21	2	2	x	3
34	2016-10-21	2	2
4	2016-10-21	3	2	2016-12-12	VRN2	52
10	2016-10-21	3	2	2017-04-11	VAL	172
16	2016-10-21	3	2	2016-12-09	NIL2	49
22	2016-10-21	3	2	2016-12-12	BRON	52
28	2016-10-21	3	2	dead	VAL
34	2016-10-21	3	2	x	3
4	2016-10-21	4	2	dead	VRN5
10	2016-10-21	4	2	2016-12-07	FCAF	47
16	2016-10-21	4	2	2016-11-16	VRN5	26
22	2016-10-21	4	2	2016-11-21	EDI	31
28	2016-10-21	4	2	x	1
34	2016-10-21	4	2	x	NIL2
4	2016-10-21	5	2	2016-11-09	LHP	19
10	2016-10-21	5	2	2016-11-18	NDX	28
16	2016-10-21	5	2	2016-11-09	COL	19
22	2016-10-21	5	2	2016-12-09	VIN3-1	49
28	2016-10-21	5	2	2016-11-18	LHP	28
34	2016-10-21	5	2	2017-05-10	LOV	201
4	2016-10-21	6	2
10	2016-10-21	6	2	x	1
16	2016-10-21	6	2	2016-12-05	FCAF	45
22	2016-10-21	6	2
28	2016-10-21	6	2	2016-11-17	flc2	27
34	2016-10-21	6	2	2017-01-05	FCAF	76
4	2016-10-21	7	2	2017-06-05	LOV	227
10	2016-10-21	7	2	2016-12-07	ULLN	47
16	2016-10-21	7	2	2017-05-01	VAR	192
22	2016-10-21	7	2	2016-12-05	SF2	45
28	2016-10-21	7	2	2016-12-26	VIN3	66
34	2016-10-21	7	2	2016-12-07	ULLN	47
4	2016-10-21	8	2	2016-12-28	BRO	68
10	2016-10-21	8	2	dead	4
16	2016-10-21	8	2	2016-11-03	EFS	13
22	2016-10-21	8	2	x	3
28	2016-10-21	8	2	2016-12-14	VARN	54
34	2016-10-21	8	2	2016-11-23	EDI	33
4	2016-10-21	9	2	x	flc2
10	2016-10-21	9	2	dead	flc2
16	2016-10-21	9	2	2016-12-12	BRON	52
22	2016-10-21	9	2	2017-03-10	VAL	140
28	2016-10-21	9	2	2016-12-05	EDIN	45
34	2016-10-21	9	2	2016-11-09	COL	19
4	2016-10-21	10	2	x	2
10	2016-10-21	10	2	2017-05-10	VAR	201
16	2016-10-21	10	2	dead	VRN2
22	2016-10-21	10	2	2016-12-14	VIN3	54
28	2016-10-21	10	2	2016-12-01	BRON	41
34	2016-10-21	10	2	2016-12-07	NDX	47
4	2016-10-21	11	2	2016-12-14	FVEF	54
10	2016-10-21	11	2
16	2016-10-21	11	2	2016-12-14	VARN	54
22	2016-10-21	11	2	2016-12-09	ULLN	49
28	2016-10-21	11	2	2016-12-05	ULLN	45
34	2016-10-21	11	2	2017-07-24	VAR	276
4	2016-10-21	1	3	2016-12-05	NIL2	45
10	2016-10-21	1	3	2016-12-05	VARN	45
16	2016-10-21	1	3
22	2016-10-21	1	3	dead	LOV
28	2016-10-21	1	3	dead	VRN5
34	2016-10-21	1	3	x	2
4	2016-10-21	2	3	2016-12-09	BRON	49
10	2016-10-21	2	3	2016-12-14	FLDF	54
16	2016-10-21	2	3	2016-12-29	BRO	69
22	2016-10-21	2	3	2016-12-26	VARN	66
28	2016-10-21	2	3	2017-01-13	BRO	84
34	2016-10-21	2	3	2017-01-05	VIN3	76
4	2016-10-21	3	3	2016-12-29	VIN3-1	69
10	2016-10-21	3	3	2017-05-01	VRN2	192
16	2016-10-21	3	3	2016-11-18	EDI	28
22	2016-10-21	3	3	2017-02-03	BRO	105
28	2016-10-21	3	3	2016-12-21	VIN3-1	61
34	2016-10-21	3	3
4	2016-10-21	4	3	2016-11-28	EDIN	38
10	2016-10-21	4	3	2016-11-09	COL	19
16	2016-10-21	4	3	2017-04-11	LOV	172
22	2016-10-21	4	3	2016-11-11	flc2	21
28	2016-10-21	4	3	2016-11-09	EFS	19
34	2016-10-21	4	3	x	1
4	2016-10-21	5	3	2017-02-14	VAL	116
10	2016-10-21	5	3	2017-01-23	BRO	94
16	2016-10-21	5	3	2016-12-19	VIN3-1	59
22	2016-10-21	5	3	2016-12-19	FLDF	59
28	2016-10-21	5	3
34	2016-10-21	5	3
4	2016-10-21	6	3
10	2016-10-21	6	3	2016-12-14	VIN3	54
16	2016-10-21	6	3	2016-12-23	FVEF	63
22	2016-10-21	6	3
28	2016-10-21	6	3	2016-12-09	NIL2	49
34	2016-10-21	6	3	2016-12-07	FLDF	47
4	2016-10-21	7	3
10	2016-10-21	7	3
16	2016-10-21	7	3	2016-12-05	EDIN	45
22	2016-10-21	7	3	2017-02-20	VRN2	122
28	2016-10-21	7	3	2017-02-14	NIL1	116
34	2016-10-21	7	3	x	4
4	2016-10-21	8	3	2016-12-28	VARN	68
10	2016-10-21	8	3	2016-12-07	BRON	47
16	2016-10-21	8	3	2016-12-07	LHP	47
22	2016-10-21	8	3	dead	NIL2
28	2016-10-21	8	3	2017-06-05	VAR	227
34	2016-10-21	8	3	2016-11-03	EFS	13
4	2016-10-21	9	3	2016-12-28	ULL	68
10	2016-10-21	9	3	2016-12-07	EDIN	47
16	2016-10-21	9	3	2017-03-10	VAL	140
22	2016-10-21	9	3	2016-12-05	EDIN	45
28	2016-10-21	9	3	2016-11-14	COL	24
34	2016-10-21	9	3	2016-12-05	SF2	45
4	2016-10-21	10	3	x	4
10	2016-10-21	10	3	2016-12-05	SF2	45
16	2016-10-21	10	3
22	2016-10-21	10	3	x	1
28	2016-10-21	10	3
34	2016-10-21	10	3	2017-02-14	VIN3-1	116
4	2016-10-21	11	3	2016-11-25	ULLN	35
10	2016-10-21	11	3
16	2016-10-21	11	3	2016-12-12	FLDF	52
22	2016-10-21	11	3	2016-12-12	FCAF	52
28	2016-10-21	11	3	2016-12-01	SF2	41
34	2016-10-21	11	3	2017-01-11	BRO	82
4	2016-10-21	1	4
10	2016-10-21	1	4	2016-11-03	EFS	13
16	2016-10-21	1	4
22	2016-10-21	1	4
28	2016-10-21	1	4	2016-11-09	COL	19
34	2016-10-21	1	4	2017-02-10	ULL	112
4	2016-10-21	2	4	2016-12-12	FVEF	52
10	2016-10-21	2	4
16	2016-10-21	2	4
22	2016-10-21	2	4	2016-12-12	EDIN	52
28	2016-10-21	2	4	x	LHP
34	2016-10-21	2	4
4	2016-10-21	3	4	2017-02-24	VAL	126
10	2016-10-21	3	4	2016-11-23	LHP	33
16	2016-10-21	3	4	2017-03-01	VAL	131
22	2016-10-21	3	4
28	2016-10-21	3	4
34	2016-10-21	3	4	2016-11-06	EFS	16
4	2016-10-21	4	4	2016-11-03	EFS	13
10	2016-10-21	4	4	2017-02-10	NIL1	112
16	2016-10-21	4	4
22	2016-10-21	4	4	x	2
28	2016-10-21	4	4	2017-01-09	BRO	80
34	2016-10-21	4	4	2016-11-28	flc2	38
4	2016-10-21	5	4	dead	ULL
10	2016-10-21	5	4	2017-01-05	ULL	76
16	2016-10-21	5	4	2016-11-01	EFS	11
22	2016-10-21	5	4	2017-03-10	VAL	140
28	2016-10-21	5	4	dead	VAL
34	2016-10-21	5	4	x	1
4	2016-10-21	6	4	2016-11-09	COL	19
10	2016-10-21	6	4	x	4
16	2016-10-21	6	4	2017-01-30	BRO	101
22	2016-10-21	6	4	2017-03-31	LOV	161
28	2016-10-21	6	4	2016-12-14	ULLN	54
34	2016-10-21	6	4	2016-12-19	NIL2	59
4	2016-10-21	7	4	2017-05-05	VRN5	196
10	2016-10-21	7	4
16	2016-10-21	7	4	x	1
22	2016-10-21	7	4	2016-12-14	FLDF	54
28	2016-10-21	7	4	2016-12-14	NIL2	54
34	2016-10-21	7	4	2016-11-10	COL	20
4	2016-10-21	8	4	x	4
10	2016-10-21	8	4	2016-12-19	VARN	59
16	2016-10-21	8	4	2016-12-01	EDIN	41
22	2016-10-21	8	4	2016-12-12	FVEF	52
28	2016-10-21	8	4	2016-12-09	EDIN	49
34	2016-10-21	8	4
4	2016-10-21	9	4	x	3
10	2016-10-21	9	4	x	1
16	2016-10-21	9	4	2016-12-14	VIN3-1	54
22	2016-10-21	9	4	2017-01-05	VIN3-1	76
28	2016-10-21	9	4	2017-03-17	VRN5	147
34	2016-10-21	9	4	2016-11-18	NDX	28
4	2016-10-21	10	4	dead	VAR
10	2016-10-21	10	4	2016-12-14	VIN3	54
16	2016-10-21	10	4	2016-11-28	LHP	38
22	2016-10-21	10	4	2016-11-25	NDX	35
28	2016-10-21	10	4	2016-12-28	VIN3	68
34	2016-10-21	10	4	2017-01-11	BRO	82
4	2016-10-21	11	4	2016-11-21	LHP	31
10	2016-10-21	11	4	2016-11-10	COL	20
16	2016-10-21	11	4	2017-01-09	ULL	80
22	2016-10-21	11	4	2017-01-30	BRO	101
28	2016-10-21	11	4	2016-12-12	BRON	52
34	2016-10-21	11	4	2017-02-20	NIL1	122
4	2016-10-21	1	5	2017-01-20	BRO	91
10	2016-10-21	1	5	2016-12-19	FVEF	59
16	2016-10-21	1	5	x	4
22	2016-10-21	1	5	2016-12-19	BRON	59
28	2016-10-21	1	5	2016-12-26	NIL1	66
34	2016-10-21	1	5	2017-03-13	VAR	143
4	2016-10-21	2	5	2017-07-24	LOV	276
10	2016-10-21	2	5	2016-11-14	flc2	24
16	2016-10-21	2	5	2016-11-28	ULLN	38
22	2016-10-21	2	5	2017-01-16	VRN2	87
28	2016-10-21	2	5
34	2016-10-21	2	5	x	4
4	2016-10-21	3	5	x	1
10	2016-10-21	3	5	2016-11-23	EDI	33
16	2016-10-21	3	5	2016-12-01	SF2	41
22	2016-10-21	3	5	2016-11-23	EDI	33
28	2016-10-21	3	5
34	2016-10-21	3	5	2016-12-09	SF2	49
4	2016-10-21	4	5	2016-11-28	EDIN	38
10	2016-10-21	4	5	2016-12-14	BRON	54
16	2016-10-21	4	5	2017-01-05	NDX	76
22	2016-10-21	4	5	2016-11-03	EFS	13
28	2016-10-21	4	5	2016-12-09	NDX	49
34	2016-10-21	4	5	2017-01-20	BRON	91
4	2016-10-21	5	5	2016-11-28	NDX	38
10	2016-10-21	5	5	2017-05-10	LOV	201
16	2016-10-21	5	5	2016-12-05	BRON	45
22	2016-10-21	5	5	2016-12-12	VARN	52
28	2016-10-21	5	5	2017-03-31	LOV	161
34	2016-10-21	5	5	2017-03-17	VAL	147
4	2016-10-21	6	5	2016-12-01	BRON	41
10	2016-10-21	6	5	2017-04-11	VAL	172
16	2016-10-21	6	5	2017-01-11	NIL1	82
22	2016-10-21	6	5
28	2016-10-21	6	5	2016-12-07	FCAF	47
34	2016-10-21	6	5	2016-11-23	LHP	33
4	2016-10-21	7	5
10	2016-10-21	7	5	2016-12-01	VIN3-1	41
16	2016-10-21	7	5	2016-12-12	VARN	52
22	2016-10-21	7	5	2017-02-14	VRN5	116
28	2016-10-21	7	5	2017-01-09	VARN	80
34	2016-10-21	7	5	2016-11-23	VIN3	33
4	2016-10-21	8	5
10	2016-10-21	8	5	dead	3
16	2016-10-21	8	5	x	2
22	2016-10-21	8	5	2017-01-30	NIL1	101
28	2016-10-21	8	5	2016-12-05	VIN3-1	45
34	2016-10-21	8	5	2016-12-05	FCAF	45
4	2016-10-21	9	5	x	2
10	2016-10-21	9	5	2016-11-25	ULLN	35
16	2016-10-21	9	5	2016-12-05	NIL2	45
22	2016-10-21	9	5	2017-02-10	NIL2	112
28	2016-10-21	9	5	2017-01-01	FVEF	72
34	2016-10-21	9	5	2016-12-19	VARN	59
4	2016-10-21	10	5	2016-11-25	FCAF	35
10	2016-10-21	10	5
16	2016-10-21	10	5	2016-11-09	COL	19
22	2016-10-21	10	5	x	3
28	2016-10-21	10	5	2017-01-09	ULL	80
34	2016-10-21	10	5	2016-12-28	FVEF	68
4	2016-10-21	11	5	2016-12-19	NIL2	59
10	2016-10-21	11	5	2016-12-21	NIL2	61
16	2016-10-21	11	5	2016-11-28	FLDF	38
22	2016-10-21	11	5	x	4
28	2016-10-21	11	5	2016-11-21	EDI	31
34	2016-10-21	11	5	2016-12-07	ULLN	47
4	2016-10-21	1	6	2016-12-01	VIN3-1	41
10	2016-10-21	1	6	2017-03-31	VAR	161
16	2016-10-21	1	6	2016-12-12	FVEF	52
22	2016-10-21	1	6	2016-11-14	LHP	24
28	2016-10-21	1	6	2017-01-09	VAR	80
34	2016-10-21	1	6	2017-02-03	VRN5	105
4	2016-10-21	2	6	2016-12-05	VARN	45
10	2016-10-21	2	6	2016-12-05	EDIN	45
16	2016-10-21	2	6	2017-03-21	LOV	151
22	2016-10-21	2	6	x	1
28	2016-10-21	2	6	x	4
34	2016-10-21	2	6
4	2016-10-21	3	6	2016-12-16	VIN3	56
10	2016-10-21	3	6	2017-06-05	VRN2	227
16	2016-10-21	3	6	x	3
22	2016-10-21	3	6	2016-12-12	VIN3	52
28	2016-10-21	3	6
34	2016-10-21	3	6	2017-06-05	LOV	227
4	2016-10-21	4	6	2017-02-10	VRN2	112
10	2016-10-21	4	6	2016-12-01	NDX	41
16	2016-10-21	4	6	2017-05-10	VRN2	201
22	2016-10-21	4	6	dead	VAR
28	2016-10-21	4	6	2016-11-03	EFS	13
34	2016-10-21	4	6	2016-11-18	EDI	28
4	2016-10-21	5	6	2016-11-28	SF2	38
10	2016-10-21	5	6	x	2
16	2016-10-21	5	6	2016-12-14	VIN3	54
22	2016-10-21	5	6	2016-11-09	flc2	19
28	2016-10-21	5	6	x	3
34	2016-10-21	5	6	2016-12-01	EDIN	41
4	2016-10-21	6	6
10	2016-10-21	6	6	2017-01-09	BRO	80
16	2016-10-21	6	6	2017-06-12	VRN5	234
22	2016-10-21	6	6	2016-12-01	ULLN	41
28	2016-10-21	6	6	2016-12-16	FLDF	56
34	2016-10-21	6	6
4	2016-10-21	7	6	2016-11-28	FLDF	38
10	2016-10-21	7	6	2017-05-01	VRN5	192
16	2016-10-21	7	6	dead	VAR
22	2016-10-21	7	6	2016-11-09	COL	19
28	2016-10-21	7	6	x	1
34	2016-10-21	7	6	x	2
4	2016-10-21	8	6	2016-11-15	EDI	25
10	2016-10-21	8	6	2017-01-05	FLDF	76
16	2016-10-21	8	6	2016-12-01	flc2	41
22	2016-10-21	8	6
28	2016-10-21	8	6	2016-11-28	SF2	38
34	2016-10-21	8	6	2017-03-06	VRN2	136
4	2016-10-21	9	6	2016-11-25	ULLN	35
10	2016-10-21	9	6
16	2016-10-21	9	6
22	2016-10-21	9	6	2017-01-30	ULL	101
28	2016-10-21	9	6	x	2
34	2016-10-21	9	6	2016-11-28	FLDF	38
4	2016-10-21	10	6	2017-01-05	NIL1	76
10	2016-10-21	10	6	2016-12-01	FCAF	41
16	2016-10-21	10	6	2016-12-12	FCAF	52
22	2016-10-21	10	6	dead	SF2
28	2016-10-21	10	6	2016-11-09	flc2	19
34	2016-10-21	10	6	x	3
4	2016-10-21	11	6	2016-11-13	flc2	23
10	2016-10-21	11	6	2016-12-12	SF2	52
16	2016-10-21	11	6	2016-11-21	EDI	31
22	2016-10-21	11	6	2016-12-09	FCAF	49
28	2016-10-21	11	6	dead	VRN2
34	2016-10-21	11	6	2016-12-12	VIN3-1	52
6	2016-11-03	1	1	2016-12-07	VARN	34
12	2016-11-03	1	1	2016-12-05	ULLN	32
18	2016-11-03	1	1	2016-11-18	flc2	15
24	2016-11-03	1	1	2016-12-05	NIL2	32
30	2016-11-03	1	1	2016-12-26	BRO	53
37	2016-11-03	1	1
6	2016-11-03	2	1	2016-11-28	FLDF	25
12	2016-11-03	2	1	2016-12-28	VRN2	55
18	2016-11-03	2	1	2017-01-13	VAR	71
24	2016-11-03	2	1	x	4
30	2016-11-03	2	1	2016-12-07	VIN3-1	34
37	2016-11-03	2	1	2016-11-25	SF2	22
6	2016-11-03	3	1	x	2
12	2016-11-03	3	1	2016-12-28	VAL	55
18	2016-11-03	3	1	2016-11-23	EDIN	20
24	2016-11-03	3	1	2016-12-09	VIN3	36
30	2016-11-03	3	1	2016-11-25	FCAF	22
37	2016-11-03	3	1	2016-12-05	VIN3-1	32
6	2016-11-03	4	1	x	3
12	2016-11-03	4	1	x	2
18	2016-11-03	4	1	2016-12-05	VIN3	32
24	2016-11-03	4	1	2016-11-28	NDX	25
30	2016-11-03	4	1	2016-11-15	flc2	12
37	2016-11-03	4	1	2016-12-07	VAL	34
6	2016-11-03	5	1	x	flc2
12	2016-11-03	5	1	x	1
18	2016-11-03	5	1	x	3
24	2016-11-03	5	1
30	2016-11-03	5	1	2016-11-12	COL	9
37	2016-11-03	5	1	2016-11-14	COL	11
6	2016-11-03	6	1	2017-01-16	ULL	74
12	2016-11-03	6	1	2016-12-14	NIL1	41
18	2016-11-03	6	1	2016-11-28	NDX	25
24	2016-11-03	6	1	2016-11-28	FLDF	25
30	2016-11-03	6	1
37	2016-11-03	6	1	2016-12-09	VARN	36
6	2016-11-03	7	1	2016-12-05	ULLN	32
12	2016-11-03	7	1	2016-12-26	BRO	53
18	2016-11-03	7	1	2016-12-12	VAL	39
24	2016-11-03	7	1	2016-12-05	FVEF	32
30	2016-11-03	7	1	2017-01-16	ULL	74
37	2016-11-03	7	1	2017-01-23	VAR	81
6	2016-11-03	8	1	2016-11-23	EDI	20
12	2016-11-03	8	1	2016-12-28	VAR	55
18	2016-11-03	8	1	2016-12-07	NIL2	34
24	2016-11-03	8	1	2016-12-26	VAL	53
30	2016-11-03	8	1	2016-12-05	VARN	32
37	2016-11-03	8	1	2016-11-06	EFS	3
6	2016-11-03	9	1	2016-11-25	FCAF	22
12	2016-11-03	9	1	2016-11-06	EFS	3
18	2016-11-03	9	1	2016-12-21	NIL1	48
24	2016-11-03	9	1
30	2016-11-03	9	1	2016-11-28	EDIN	25
37	2016-11-03	9	1	2016-12-07	NIL2	34
6	2016-11-03	10	1
12	2016-11-03	10	1	2016-12-19	ULL	46
18	2016-11-03	10	1	x	4
24	2016-11-03	10	1	2016-12-26	VRN2	53
30	2016-11-03	10	1	2016-12-05	FVEF	32
37	2016-11-03	10	1	2016-11-28	NDX	25
6	2016-11-03	11	1	2017-01-18	VRN5	76
12	2016-11-03	11	1	2016-11-23	EDI	20
18	2016-11-03	11	1	2017-01-03	VRN2	61
24	2016-11-03	11	1
30	2016-11-03	11	1	2016-11-28	NDX	25
37	2016-11-03	11	1	2016-12-05	ULLN	32
6	2016-11-03	1	2	2016-12-09	VIN3-1	36
12	2016-11-03	1	2	2016-12-05	NIL2	32
18	2016-11-03	1	2	2016-11-25	FCAF	22
24	2016-11-03	1	2	2016-11-23	EDI	20
30	2016-11-03	1	2
37	2016-11-03	1	2	2016-12-07	VIN3	34
6	2016-11-03	2	2	2016-12-05	BRON	32
12	2016-11-03	2	2	2016-12-23	EDIN	50
18	2016-11-03	2	2	x	1
24	2016-11-03	2	2	2016-12-05	ULLN	32
30	2016-11-03	2	2	2016-11-24	FLDF	21
37	2016-11-03	2	2	2017-03-17	VRN2	134
6	2016-11-03	3	2	x	1
12	2016-11-03	3	2	x	4
18	2016-11-03	3	2
24	2016-11-03	3	2	dead	LOV
30	2016-11-03	3	2	2016-11-18	LHP	15
37	2016-11-03	3	2	2016-11-28	EDIN	25
6	2016-11-03	4	2	2016-11-28	SF2	25
12	2016-11-03	4	2	2016-12-01	BRON	28
18	2016-11-03	4	2	2016-12-05	BRON	32
24	2016-11-03	4	2	2017-01-05	ULL	63
30	2016-11-03	4	2
37	2016-11-03	4	2	2017-01-09	NIL1	67
6	2016-11-03	5	2	2017-03-23	LOV	140
12	2016-11-03	5	2
18	2016-11-03	5	2
24	2016-11-03	5	2	2016-12-05	VARN	32
30	2016-11-03	5	2	2017-01-23	VRN5	81
37	2016-11-03	5	2	2016-12-19	VRN5	46
6	2016-11-03	6	2	2016-12-15	VAL	42
12	2016-11-03	6	2
18	2016-11-03	6	2	dead	LOV
24	2016-11-03	6	2	x	1
30	2016-11-03	6	2	dead	LOV
37	2016-11-03	6	2	2016-11-25	FCAF	22
6	2016-11-03	7	2	2016-12-01	FVEF	28
12	2016-11-03	7	2	2016-12-01	NDX	28
18	2016-11-03	7	2	2017-01-26	ULL	84
24	2016-11-03	7	2	2016-11-15	flc2	12
30	2016-11-03	7	2	2016-11-28	ULLN	25
37	2016-11-03	7	2	2016-11-01	LHP	-2
6	2016-11-03	8	2	2016-12-07	VIN3	34
12	2016-11-03	8	2	2016-11-10	COL	7
18	2016-11-03	8	2	2016-11-15	LHP	12
24	2016-11-03	8	2	2016-11-23	EDIN	20
30	2016-11-03	8	2	2016-12-19	NIL1	46
37	2016-11-03	8	2	x	4
6	2016-11-03	9	2	2016-11-09	EFS	6
12	2016-11-03	9	2	2016-11-13	LHP	10
18	2016-11-03	9	2	2016-12-01	FLDF	28
24	2016-11-03	9	2	2016-11-23	FCAF	20
30	2016-11-03	9	2	2016-12-26	VAL	53
37	2016-11-03	9	2	2016-11-14	flc2	11
6	2016-11-03	10	2
12	2016-11-03	10	2	2017-05-01	LOV	179
18	2016-11-03	10	2	2017-01-05	BRO	63
24	2016-11-03	10	2	2016-11-16	LHP	13
30	2016-11-03	10	2	2016-12-12	VIN3	39
37	2016-11-03	10	2	x	3
6	2016-11-03	11	2	x	4
12	2016-11-03	11	2
18	2016-11-03	11	2	2016-12-05	VIN3-1	32
24	2016-11-03	11	2	2016-11-14	COL	11
30	2016-11-03	11	2	2016-11-28	SF2	25
37	2016-11-03	11	2	2016-12-05	BRON	32
6	2016-11-03	1	3
12	2016-11-03	1	3	2016-12-05	VARN	32
18	2016-11-03	1	3	2016-12-05	FVEF	32
24	2016-11-03	1	3
30	2016-11-03	1	3	x	2
37	2016-11-03	1	3	x	1
6	2016-11-03	2	3	2016-11-25	EDIN	22
12	2016-11-03	2	3	2016-11-28	VIN3-1	25
18	2016-11-03	2	3	2016-11-09	EFS	6
24	2016-11-03	2	3	2016-11-03	EFS	0
30	2016-11-03	2	3	2016-11-06	EFS	3
37	2016-11-03	2	3
6	2016-11-03	3	3	2016-12-05	NIL2	32
12	2016-11-03	3	3	2016-11-13	flc2	10
18	2016-11-03	3	3
24	2016-11-03	3	3	2016-12-26	NIL1	53
30	2016-11-03	3	3	x	1
37	2016-11-03	3	3
6	2016-11-03	4	3	2016-11-12	LHP	9
12	2016-11-03	4	3	2016-12-05	VIN3	32
18	2016-11-03	4	3	2016-11-28	SF2	25
24	2016-11-03	4	3	x	3
30	2016-11-03	4	3	x	3
37	2016-11-03	4	3	2017-02-03	ULL	92
6	2016-11-03	5	3	2017-01-05	VAR	63
12	2016-11-03	5	3
18	2016-11-03	5	3	2016-12-07	VARN	34
24	2016-11-03	5	3	x	SF2
30	2016-11-03	5	3	2017-02-10	VRN2	99
37	2016-11-03	5	3
6	2016-11-03	6	3
12	2016-11-03	6	3	2016-12-19	VRN5	46
18	2016-11-03	6	3	x	2
24	2016-11-03	6	3	dead	VAR
30	2016-11-03	6	3	2016-11-28	BRON	25
37	2016-11-03	6	3	2016-12-01	FLDF	28
6	2016-11-03	7	3	2016-11-23	NDX	20
12	2016-11-03	7	3	2016-11-21	SF2	18
18	2016-11-03	7	3	2017-01-13	VRN5	71
24	2016-11-03	7	3	2016-12-05	VRN5	32
30	2016-11-03	7	3	x	4
37	2016-11-03	7	3	2016-12-07	FVEF	34
6	2016-11-03	8	3	2016-11-14	COL	11
12	2016-11-03	8	3	x	3
18	2016-11-03	8	3	2016-11-11	COL	8
24	2016-11-03	8	3	x	2
30	2016-11-03	8	3	2016-11-21	EDI	18
37	2016-11-03	8	3	2017-03-10	LOV	127
6	2016-11-03	9	3	2016-12-07	NIL1	34
12	2016-11-03	9	3	2016-11-23	FCAF	20
18	2016-11-03	9	3
24	2016-11-03	9	3	2016-11-23	VIN3-1	20
30	2016-11-03	9	3	2016-12-05	NIL2	32
37	2016-11-03	9	3	x	2
6	2016-11-03	10	3	2016-12-26	BRO	53
12	2016-11-03	10	3	2016-12-07	FVEF	34
18	2016-11-03	10	3	2016-12-05	ULLN	32
24	2016-11-03	10	3	2016-12-26	BRO	53
30	2016-11-03	10	3	2016-11-12	VAR	9
37	2016-11-03	10	3	2017-01-05	BRO	63
6	2016-11-03	11	3	2017-01-23	VRN2	81
12	2016-11-03	11	3	2016-12-01	FLDF	28
18	2016-11-03	11	3	2016-11-21	EDI	18
24	2016-11-03	11	3	2016-12-05	BRON	32
30	2016-11-03	11	3
37	2016-11-03	11	3	2016-11-23	EDI	20
6	2016-11-03	1	4	2016-12-09	VIN3	36
12	2016-11-03	1	4	2016-11-21	EDIN	18
18	2016-11-03	1	4	2016-12-01	FLDF	28
24	2016-11-03	1	4	x	1
30	2016-11-03	1	4	2016-12-01	VIN3-1	28
37	2016-11-03	1	4	2016-11-28	VIN3-1	25
6	2016-11-03	2	4
12	2016-11-03	2	4	2016-12-26	ULL	53
18	2016-11-03	2	4	2016-11-13	COL	10
24	2016-11-03	2	4	2016-12-09	VIN3-1	36
30	2016-11-03	2	4	2016-11-09	EFS	6
37	2016-11-03	2	4	2016-12-05	VARN	32
6	2016-11-03	3	4	2017-03-31	LOV	148
12	2016-11-03	3	4	2016-11-28	FLDF	25
18	2016-11-03	3	4	x	4
24	2016-11-03	3	4
30	2016-11-03	3	4
37	2016-11-03	3	4	2016-11-23	EDI	20
6	2016-11-03	4	4	2017-01-30	VAR	88
12	2016-11-03	4	4	2016-11-28	BRON	25
18	2016-11-03	4	4	2016-12-07	VAL	34
24	2016-11-03	4	4	x	VRN2
30	2016-11-03	4	4	2017-01-16	VRN2	74
37	2016-11-03	4	4	2016-12-05	BRON	32
6	2016-11-03	5	4
12	2016-11-03	5	4	2016-12-05	VARN	32
18	2016-11-03	5	4	x	1
24	2016-11-03	5	4	dead	VRN5
30	2016-11-03	5	4	2017-01-02	VAR	60
37	2016-11-03	5	4
6	2016-11-03	6	4	2016-12-01	VIN3-1	28
12	2016-11-03	6	4	2016-12-05	VIN3	32
18	2016-11-03	6	4	2016-11-21	EDI	18
24	2016-11-03	6	4	2016-12-01	FLDF	28
30	2016-11-03	6	4	2016-12-05	BRON	32
37	2016-11-03	6	4	2016-11-23	NDX	20
6	2016-11-03	7	4	x	3
12	2016-11-03	7	4	x	4
18	2016-11-03	7	4	2016-12-05	VARN	32
24	2016-11-03	7	4	x	4
30	2016-11-03	7	4	2016-11-23	SF2	20
37	2016-11-03	7	4	2016-11-28	SF2	25
6	2016-11-03	8	4	2016-11-09	EFS	6
12	2016-11-03	8	4	2016-12-12	BRO	39
18	2016-11-03	8	4	2016-12-05	NDX	32
24	2016-11-03	8	4	2017-01-10	ULL	68
30	2016-11-03	8	4	2016-11-28	NDX	25
37	2016-11-03	8	4	2016-12-01	FCAF	28
6	2016-11-03	9	4	2017-01-30	ULL	88
12	2016-11-03	9	4	2016-11-12	flc2	9
18	2016-11-03	9	4	2016-11-15	LHP	12
24	2016-11-03	9	4	2016-11-03	EFS	0
30	2016-11-03	9	4	2017-01-16	ULL	74
37	2016-11-03	9	4	2016-12-05	NIL2	32
6	2016-11-03	10	4	2016-11-21	EDI	18
12	2016-11-03	10	4	dead	LOV
18	2016-11-03	10	4	x	2
24	2016-11-03	10	4	2016-12-05	ULLN	32
30	2016-11-03	10	4	2017-01-23	VRN5	81
37	2016-11-03	10	4	2016-11-15	LHP	12
6	2016-11-03	11	4	2016-12-01	FLDF	28
12	2016-11-03	11	4	2016-11-23	SF2	20
18	2016-11-03	11	4	2017-01-13	VRN5	71
24	2016-11-03	11	4	2016-11-15	LHP	12
30	2016-11-03	11	4	2016-12-07	VARN	34
37	2016-11-03	11	4	x	1
6	2016-11-03	1	5	2017-01-23	VRN2	81
12	2016-11-03	1	5	2017-01-09	VAR	67
18	2016-11-03	1	5
24	2016-11-03	1	5	x	3
30	2016-11-03	1	5	2016-11-14	flc2	11
37	2016-11-03	1	5	2016-11-23	EDIN	20
6	2016-11-03	2	5	2016-12-26	VRN5	53
12	2016-11-03	2	5	2016-12-01	ULLN	28
18	2016-11-03	2	5	2017-01-05	BRO	63
24	2016-11-03	2	5	2016-11-14	flc2	11
30	2016-11-03	2	5	2016-11-18	LHP	15
37	2016-11-03	2	5	2016-12-05	VIN3	32
6	2016-11-03	3	5	2016-12-05	ULLN	32
12	2016-11-03	3	5
18	2016-11-03	3	5	2016-11-09	EFS	6
24	2016-11-03	3	5	2016-11-15	COL	12
30	2016-11-03	3	5	2016-12-12	VIN3	39
37	2016-11-03	3	5	2016-11-28	FLDF	25
6	2016-11-03	4	5	2016-10-01	NDX	-33
12	2016-11-03	4	5	2016-11-03	EFS	0
18	2016-11-03	4	5	2016-12-07	FVEF	34
24	2016-11-03	4	5
30	2016-11-03	4	5
37	2016-11-03	4	5	x	3
6	2016-11-03	5	5	2016-11-12	COL	9
12	2016-11-03	5	5
18	2016-11-03	5	5
24	2016-11-03	5	5	2016-12-05	BRON	32
30	2016-11-03	5	5	2017-01-05	BRO	63
37	2016-11-03	5	5	2016-12-05	FVEF	32
6	2016-11-03	6	5	x	1
12	2016-11-03	6	5	2016-11-28	NDX	25
18	2016-11-03	6	5	2016-12-12	NIL1	39
24	2016-11-03	6	5	2016-12-07	VIN3	34
30	2016-11-03	6	5	2016-11-21	EDI	18
37	2016-11-03	6	5	2016-11-14	flc2	11
6	2016-11-03	7	5	2016-11-25	EDIN	22
12	2016-11-03	7	5	2016-12-01	NIL2	28
18	2016-11-03	7	5	2016-11-14	flc2	11
24	2016-11-03	7	5	2016-12-26	VAL	53
30	2016-11-03	7	5	2016-12-21	VAL	48
37	2016-11-03	7	5	2016-12-05	ULLN	32
6	2016-11-03	8	5
12	2016-11-03	8	5	x	3
18	2016-11-03	8	5	2016-12-01	VIN3	28
24	2016-11-03	8	5	2016-11-21	EDI	18
30	2016-11-03	8	5	x	2
37	2016-11-03	8	5	2016-12-09	VRN5	36
6	2016-11-03	9	5	x	4
12	2016-11-03	9	5	2016-12-09	VIN3-1	36
18	2016-11-03	9	5	2016-12-01	NIL2	28
24	2016-11-03	9	5	x	2
30	2016-11-03	9	5	x	3
37	2016-11-03	9	5	2016-12-28	NIL1	55
6	2016-11-03	10	5	x	2
12	2016-11-03	10	5	2016-11-15	LHP	12
18	2016-11-03	10	5	2017-01-03	ULL	61
24	2016-11-03	10	5	dead	LOV
30	2016-11-03	10	5	2016-11-28	FCAF	25
37	2016-11-03	10	5	2017-01-26	ULL	84
6	2016-11-03	11	5	2016-12-26	BRO	53
12	2016-11-03	11	5
18	2016-11-03	11	5	2016-11-28	FCAF	25
24	2016-11-03	11	5	2016-12-05	VARN	32
30	2016-11-03	11	5	2016-12-05	NIL2	32
37	2016-11-03	11	5	2016-11-11	COL	8
6	2016-11-03	1	6	2016-12-07	VARN	34
12	2016-11-03	1	6
18	2016-11-03	1	6	2016-12-01	ULLN	28
24	2016-11-03	1	6	x	SF2
30	2016-11-03	1	6	2016-12-12	NIL1	39
37	2016-11-03	1	6	2017-01-30	VAR	88
6	2016-11-03	2	6	2016-11-25	SF2	22
12	2016-11-03	2	6	2016-12-05	FVEF	32
18	2016-11-03	2	6	x	3
24	2016-11-03	2	6	2017-01-23	VAR	81
30	2016-11-03	2	6	2016-11-23	EDIN	20
37	2016-11-03	2	6
6	2016-11-03	3	6	2016-11-25	FCAF	22
12	2016-11-03	3	6	x	1
18	2016-11-03	3	6
24	2016-11-03	3	6	2016-11-23	FCAF	20
30	2016-11-03	3	6	x	ULLN
37	2016-11-03	3	6
6	2016-11-03	4	6
12	2016-11-03	4	6	2016-12-28	VRN2	55
18	2016-11-03	4	6	dead	LOV
24	2016-11-03	4	6	2016-12-01	NDX	28
30	2016-11-03	4	6	x	1
37	2016-11-03	4	6	2016-12-19	VAL	46
6	2016-11-03	5	6	2016-12-23	VAL	50
12	2016-11-03	5	6	2016-12-19	NIL1	46
18	2016-11-03	5	6	2016-11-23	SF2	20
24	2016-11-03	5	6	2016-12-01	NIL2	28
30	2016-11-03	5	6	2016-11-11	COL	8
37	2016-11-03	5	6	2016-12-26	BRO	53
6	2016-11-03	6	6	2016-12-01	BRON	28
12	2016-11-03	6	6	2016-12-01	FCAF	28
18	2016-11-03	6	6	2016-12-01	VIN3-1	28
24	2016-11-03	6	6
30	2016-11-03	6	6	2016-12-09	FVEF	36
37	2016-11-03	6	6	x	2
6	2016-11-03	7	6	2016-12-01	NIL2	28
12	2016-11-03	7	6	2016-12-16	VAL	43
18	2016-11-03	7	6	2016-11-23	EDIN	20
24	2016-11-03	7	6	2016-11-25	EDIN	22
30	2016-11-03	7	6	dead	LOV
37	2016-11-03	7	6	2016-11-09	EFS	6
6	2016-11-03	8	6	2016-11-18	LHP	15
12	2016-11-03	8	6	x	2
18	2016-11-03	8	6	2016-12-05	BRON	32
24	2016-11-03	8	6	2016-12-12	NIL1	39
30	2016-11-03	8	6
37	2016-11-03	8	6	2017-05-01	LOV	179
6	2016-11-03	9	6	2016-12-01	FVEF	28
12	2016-11-03	9	6	2016-11-23	EDI	20
18	2016-11-03	9	6
24	2016-11-03	9	6
30	2016-11-03	9	6	2016-11-25	FLDF	22
37	2016-11-03	9	6	x	4
6	2016-11-03	10	6	2016-11-14	flc2	11
12	2016-11-03	10	6	2016-12-12	VRN5	39
18	2016-11-03	10	6	2017-01-13	VAR	71
24	2016-11-03	10	6	2017-01-05	BRO	63
30	2016-11-03	10	6	x	4
37	2016-11-03	10	6
6	2016-11-03	11	6	2016-12-09	NIL1	36
12	2016-11-03	11	6	2016-11-16	COL	13
18	2016-11-03	11	6	2017-01-05	VRN2	63
24	2016-11-03	11	6	2016-12-12	FVEF	39
30	2016-11-03	11	6
37	2016-11-03	11	6	2016-12-26	VRN2	53
2	2016-11-17	1	1	2016-12-21	VAR	34
8	2016-11-17	1	1	2017-01-23	VRN5	67
14	2016-11-17	1	1	2016-12-16	VIN3-1	29
20	2016-11-17	1	1	2016-12-16	VIN3	29
26	2016-11-17	1	1	x	3
32	2016-11-17	1	1	2016-12-19	VIN3	32
2	2016-11-17	2	1	x	1
8	2016-11-17	2	1	2016-12-05	EDI	18
14	2016-11-17	2	1
20	2016-11-17	2	1
26	2016-11-17	2	1	2016-12-16	NIL1	29
32	2016-11-17	2	1	2016-12-05	NIL2	18
2	2016-11-17	3	1	2016-12-09	NIL1	22
8	2016-11-17	3	1
14	2016-11-17	3	1
20	2016-11-17	3	1	2016-12-09	VARN	22
26	2016-11-17	3	1	2016-12-23	BRO	36
32	2016-11-17	3	1	2016-12-05	NDX	18
2	2016-11-17	4	1
8	2016-11-17	4	1	x	1
14	2016-11-17	4	1	2017-01-23	LOV	67
20	2016-11-17	4	1	2016-11-17	EFS	0
26	2016-11-17	4	1	2016-12-01	LHP	14
32	2016-11-17	4	1	2016-12-01	EDI	14
2	2016-11-17	5	1	x	4
8	2016-11-17	5	1	2016-12-19	VAL	32
14	2016-11-17	5	1	2016-12-05	BRON	18
20	2016-11-17	5	1	2016-12-07	NIL2	20
26	2016-11-17	5	1	x	2
32	2016-11-17	5	1	2016-12-19	VAR	32
2	2016-11-17	6	1
8	2016-11-17	6	1	x	4
14	2016-11-17	6	1	2016-12-19	BRO	32
20	2016-11-17	6	1	2016-12-05	FCAF	18
26	2016-11-17	6	1	2016-12-21	VAL	34
32	2016-11-17	6	1
2	2016-11-17	7	1	2016-11-28	LHP	11
8	2016-11-17	7	1
14	2016-11-17	7	1	2016-12-01	FCAF	14
20	2016-11-17	7	1	2016-12-15	NIL1	28
26	2016-11-17	7	1	2016-12-30	ULL	43
32	2016-11-17	7	1	2016-12-05	SF2	18
2	2016-11-17	8	1
8	2016-11-17	8	1	2016-12-07	ULLN	20
14	2016-11-17	8	1	2016-12-09	NIL1	22
20	2016-11-17	8	1	2017-02-10	VRN2	85
26	2016-11-17	8	1	2016-11-25	COL	8
32	2016-11-17	8	1	2016-12-09	VARN	22
2	2016-11-17	9	1	2016-12-19	VIN3	32
8	2016-11-17	9	1	2016-12-09	FVEF	22
14	2016-11-17	9	1	2016-11-28	EDI	11
20	2016-11-17	9	1	2016-12-05	ULLN	18
26	2016-11-17	9	1	2016-12-07	NIL2	20
32	2016-11-17	9	1	2016-12-07	FVEF	20
2	2016-11-17	10	1	2016-12-05	SF2	18
8	2016-11-17	10	1	2016-12-05	BRON	18
14	2016-11-17	10	1	2017-01-03	VRN5	47
20	2016-11-17	10	1	2016-11-25	flc2	8
26	2016-11-17	10	1	2016-11-28	flc2	11
32	2016-11-17	10	1	2016-12-14	VIN3-1	27
2	2016-11-17	11	1	2016-12-07	FLDF	20
8	2016-11-17	11	1	2016-12-09	VARN	22
14	2016-11-17	11	1	2016-12-05	FLDF	18
20	2016-11-17	11	1	2016-12-05	EDIN	18
26	2016-11-17	11	1	2016-12-05	NDX	18
32	2016-11-17	11	1	2016-12-21	ULL	34
2	2016-11-17	1	2	2016-12-05	BRON	18
8	2016-11-17	1	2
14	2016-11-17	1	2	2016-12-07	FVEF	20
20	2016-11-17	1	2	2016-11-28	EDI	11
26	2016-11-17	1	2
32	2016-11-17	1	2	2016-12-07	ULLN	20
2	2016-11-17	2	2	2016-12-07	FCAF	20
8	2016-11-17	2	2	x	2
14	2016-11-17	2	2	2016-12-23	VAR	36
20	2016-11-17	2	2
26	2016-11-17	2	2	2016-12-12	ULLN	25
32	2016-11-17	2	2
2	2016-11-17	3	2	2016-12-09	NDX	22
8	2016-11-17	3	2	2016-12-07	FLDF	20
14	2016-11-17	3	2	2016-12-07	ULLN	20
20	2016-11-17	3	2	x	4
26	2016-11-17	3	2
32	2016-11-17	3	2	x	1
2	2016-11-17	4	2	2016-12-07	EDIN	20
8	2016-11-17	4	2	2016-12-15	VIN3	28
14	2016-11-17	4	2	2016-12-01	NDX	14
20	2016-11-17	4	2	2016-12-26	LOV	39
26	2016-11-17	4	2	x	1
32	2016-11-17	4	2	2016-11-09	EFS	-8
2	2016-11-17	5	2	2017-01-05	VRN2	49
8	2016-11-17	5	2	2016-12-07	LHP	20
14	2016-11-17	5	2	2016-12-01	EDIN	14
20	2016-11-17	5	2
26	2016-11-17	5	2	dead	VRN5
32	2016-11-17	5	2	2017-01-03	LOV	47
2	2016-11-17	6	2	2016-12-23	ULL	36
8	2016-11-17	6	2	2016-12-23	BRO	36
14	2016-11-17	6	2	x	4
20	2016-11-17	6	2	2016-12-01	LHP	14
26	2016-11-17	6	2	x	4
32	2016-11-17	6	2	2016-12-19	BRO	32
2	2016-11-17	7	2	x	3
8	2016-11-17	7	2	2017-01-23	VRN2	67
14	2016-11-17	7	2	2016-12-05	NIL2	18
20	2016-11-17	7	2	x	VAR
26	2016-11-17	7	2	2016-12-09	EDIN	22
32	2016-11-17	7	2	2016-12-25	FLDF	38
2	2016-11-17	8	2	2016-11-28	flc2	11
8	2016-11-17	8	2	2016-12-09	NDX	22
14	2016-11-17	8	2	x	3
20	2016-11-17	8	2
26	2016-11-17	8	2	2016-12-09	FLDF	22
32	2016-11-17	8	2	2016-12-19	NIL1	32
2	2016-11-17	9	2	2016-12-14	VRN5	27
8	2016-11-17	9	2	2016-12-14	ULL	27
14	2016-11-17	9	2	x	2
20	2016-11-17	9	2	2016-12-05	FVEF	18
26	2016-11-17	9	2	dead	VRN2
32	2016-11-17	9	2	2016-12-19	VRN5	32
2	2016-11-17	10	2	x	VARN
8	2016-11-17	10	2	2016-12-05	EDIN	18
14	2016-11-17	10	2
20	2016-11-17	10	2	2016-12-23	BRO	36
26	2016-11-17	10	2	2016-12-05	FCAF	18
32	2016-11-17	10	2	2016-12-01	LHP	14
2	2016-11-17	11	2	2016-11-28	COL	11
8	2016-11-17	11	2
14	2016-11-17	11	2	2016-12-19	ULL	32
20	2016-11-17	11	2	2016-12-01	SF2	14
26	2016-11-17	11	2	2016-12-07	FVEF	20
32	2016-11-17	11	2	x	4
2	2016-11-17	1	3
8	2016-11-17	1	3	x	flc2
14	2016-11-17	1	3	2017-01-26	VRN2	70
20	2016-11-17	1	3	2016-11-28	COL	11
26	2016-11-17	1	3	2016-11-23	EFS	6
32	2016-11-17	1	3	2016-12-05	FCAF	18
2	2016-11-17	2	3	2016-12-12	FVEF	25
8	2016-11-17	2	3	2016-12-15	VIN3-1	28
14	2016-11-17	2	3	2016-12-21	VIN3	34
20	2016-11-17	2	3	2017-01-03	VRN5	47
26	2016-11-17	2	3	2016-12-19	VIN3-1	32
32	2016-11-17	2	3	2017-01-16	VRN2	60
2	2016-11-17	3	3	2016-12-12	ULLN	25
8	2016-11-17	3	3	2016-12-12	FCAF	25
14	2016-11-17	3	3	2016-11-23	COL	6
20	2016-11-17	3	3	dead	VAL
26	2016-11-17	3	3	2016-12-05	EDI	18
32	2016-11-17	3	3	2016-12-05	BRON	18
2	2016-11-17	4	3	2016-12-05	NIL2	18
8	2016-11-17	4	3	2016-12-14	NIL1	27
14	2016-11-17	4	3	2016-11-09	EFS	-8
20	2016-11-17	4	3	x	1
26	2016-11-17	4	3	2016-12-05	SF2	18
32	2016-11-17	4	3	x	3
2	2016-11-17	5	3	2016-12-19	VIN3-1	32
8	2016-11-17	5	3	2017-01-11	LOV	55
14	2016-11-17	5	3	2016-11-25	flc2	8
20	2016-11-17	5	3	2016-12-05	NDX	18
26	2016-11-17	5	3	2016-12-16	VIN3	29
32	2016-11-17	5	3	2016-12-21	VAL	34
2	2016-11-17	6	3	2016-11-28	EDI	11
8	2016-11-17	6	3	2016-12-16	NIL2	29
14	2016-11-17	6	3
20	2016-11-17	6	3	x	2
26	2016-11-17	6	3
32	2016-11-17	6	3
2	2016-11-17	7	3	x	2
8	2016-11-17	7	3	2016-11-17	EFS	0
14	2016-11-17	7	3	2016-12-14	VAL	27
20	2016-11-17	7	3	2016-12-05	FLDF	18
26	2016-11-17	7	3	2016-12-09	VARN	22
32	2016-11-17	7	3	2016-11-25	COL	8
2	2016-11-17	8	3	2016-12-23	LOV	36
8	2016-11-17	8	3	2016-11-25	COL	8
14	2016-11-17	8	3	x	1
20	2016-11-17	8	3	2016-12-16	ULL	29
26	2016-11-17	8	3	2016-12-05	BRON	18
32	2016-11-17	8	3	2016-12-05	EDIN	18
2	2016-11-17	9	3	2016-12-16	BRO	29
8	2016-11-17	9	3	x	3
14	2016-11-17	9	3	2016-12-07	SF2	20
20	2016-11-17	9	3	x	3
26	2016-11-17	9	3	2016-12-19	VAR	32
32	2016-11-17	9	3
2	2016-11-17	10	3	2016-12-12	VAL	25
8	2016-11-17	10	3	2016-12-23	VAR	36
14	2016-11-17	10	3	2016-12-09	VARN	22
20	2016-11-17	10	3	2016-12-12	VIN3-1	25
26	2016-11-17	10	3	2016-12-21	LOV	34
32	2016-11-17	10	3	2016-11-25	flc2	8
2	2016-11-17	11	3	2016-11-17	EFS	0
8	2016-11-17	11	3	2016-12-05	SF2	18
14	2016-11-17	11	3	2016-11-28	LHP	11
20	2016-11-17	11	3	2016-12-05	BRON	18
26	2016-11-17	11	3
32	2016-11-17	11	3	x	2
2	2016-11-17	1	4	x	3
8	2016-11-17	1	4	2016-12-05	EDI	18
14	2016-11-17	1	4	2016-12-05	EDIN	18
20	2016-11-17	1	4	2017-01-10	VRN5	54
26	2016-11-17	1	4	2016-12-05	BRON	18
32	2016-11-17	1	4	2016-11-24	EFS	7
2	2016-11-17	2	4	2016-12-05	COL	18
8	2016-11-17	2	4	2016-12-21	BRO	34
14	2016-11-17	2	4	2016-12-28	LOV	41
20	2016-11-17	2	4	2016-12-12	NIL2	25
26	2016-11-17	2	4	2017-01-05	LOV	49
32	2016-11-17	2	4	2016-11-28	flc2	11
2	2016-11-17	3	4	2016-12-05	ULLN	18
8	2016-11-17	3	4	2017-01-23	VRN2	67
14	2016-11-17	3	4	2016-12-07	ULLN	20
20	2016-11-17	3	4	2016-12-16	VIN3-1	29
26	2016-11-17	3	4	2016-12-30	VAR	43
32	2016-11-17	3	4	x	2
2	2016-11-17	4	4	x	2
8	2016-11-17	4	4	x	3
14	2016-11-17	4	4	2016-12-14	VIN3-1	27
20	2016-11-17	4	4	2016-11-28	flc2	11
26	2016-11-17	4	4	x	4
32	2016-11-17	4	4	2016-12-16	BRO	29
2	2016-11-17	5	4	2016-12-12	VARN	25
8	2016-11-17	5	4	x	2
14	2016-11-17	5	4	2016-12-05	SF2	18
20	2016-11-17	5	4	2016-12-01	NDX	14
26	2016-11-17	5	4	2016-12-01	FCAF	14
32	2016-11-17	5	4	2016-12-15	VIN3-1	28
2	2016-11-17	6	4
8	2016-11-17	6	4	2016-12-16	VARN	29
14	2016-11-17	6	4	2016-12-14	NIL1	27
20	2016-11-17	6	4	2016-12-05	BRON	18
26	2016-11-17	6	4	x	2
32	2016-11-17	6	4	2016-11-28	COL	11
2	2016-11-17	7	4	2016-11-28	EDI	11
8	2016-11-17	7	4	2016-11-28	COL	11
14	2016-11-17	7	4	2016-12-14	VAL	27
20	2016-11-17	7	4	2016-12-05	FLDF	18
26	2016-11-17	7	4	2016-12-05	NIL2	18
32	2016-11-17	7	4	2016-12-14	NIL1	27
2	2016-11-17	8	4	2016-12-12	NIL1	25
8	2016-11-17	8	4	2017-01-05	VRN5	49
14	2016-11-17	8	4	x	4
20	2016-11-17	8	4	2016-12-09	FVEF	22
26	2016-11-17	8	4
32	2016-11-17	8	4	2016-12-19	VRN5	32
2	2016-11-17	9	4	2016-12-05	FLDF	18
8	2016-11-17	9	4	2016-12-12	FLDF	25
14	2016-11-17	9	4	2016-12-09	BRON	22
20	2016-11-17	9	4	2016-12-05	FCAF	18
26	2016-11-17	9	4	2017-01-23	VRN2	67
32	2016-11-17	9	4	x	3
2	2016-11-17	10	4	dead	VRN2
8	2016-11-17	10	4	2016-12-05	NIL2	18
14	2016-11-17	10	4	2016-12-12	FVEF	25
20	2016-11-17	10	4	x	4
26	2016-11-17	10	4	x	3
32	2016-11-17	10	4	2016-12-07	ULLN	20
2	2016-11-17	11	4	2016-12-16	ULL	29
8	2016-11-17	11	4	2016-12-16	VIN3	29
14	2016-11-17	11	4	2016-12-05	NIL2	18
20	2016-11-17	11	4	2016-12-21	VAR	34
26	2016-11-17	11	4	2016-12-16	VIN3	29
32	2016-11-17	11	4
2	2016-11-17	1	5	2016-12-16	BRO	29
8	2016-11-17	1	5	2016-12-05	NDX	18
14	2016-11-17	1	5
20	2016-11-17	1	5	2016-12-15	ULL	28
26	2016-11-17	1	5	2017-01-03	VRN5	47
32	2016-11-17	1	5	2016-11-28	LHP	11
2	2016-11-17	2	5	2016-12-14	FVEF	27
8	2016-11-17	2	5	2016-12-01	EDIN	14
14	2016-11-17	2	5	x	3
20	2016-11-17	2	5	2016-12-05	EDIN	18
26	2016-11-17	2	5	2016-12-09	FLDF	22
32	2016-11-17	2	5
2	2016-11-17	3	5	x	1
8	2016-11-17	3	5	2016-12-16	VAR	29
14	2016-11-17	3	5	2016-11-28	LHP	11
20	2016-11-17	3	5	2016-12-07	VARN	20
26	2016-11-17	3	5	2016-12-05	NDX	18
32	2016-11-17	3	5	2016-11-28	EDI	11
2	2016-11-17	4	5	2016-12-16	VRN5	29
8	2016-11-17	4	5	2016-11-28	LHP	11
14	2016-11-17	4	5	2016-12-09	VARN	22
20	2016-11-17	4	5	x	2
26	2016-11-17	4	5	2016-12-15	VIN3-1	28
32	2016-11-17	4	5	2016-12-23	VAR	36
2	2016-11-17	5	5	x	VAL
8	2016-11-17	5	5
14	2016-11-17	5	5	2016-12-05	NDX	18
20	2016-11-17	5	5	2016-12-16	NIL1	29
26	2016-11-17	5	5	2016-12-09	VARN	22
32	2016-11-17	5	5	2017-01-26	VRN2	70
2	2016-11-17	6	5	2016-11-28	LHP	11
8	2016-11-17	6	5
14	2016-11-17	6	5	2016-12-30	VAR	43
20	2016-11-17	6	5
26	2016-11-17	6	5	2016-12-07	FVEF	20
32	2016-11-17	6	5	2016-12-26	LOV	39
2	2016-11-17	7	5	2016-12-05	BRON	18
8	2016-11-17	7	5	2016-12-09	BRON	22
14	2016-11-17	7	5	2017-01-05	VRN5	49
20	2016-11-17	7	5	x	1
26	2016-11-17	7	5
32	2016-11-17	7	5
2	2016-11-17	8	5	2016-12-09	VIN3	22
8	2016-11-17	8	5	2016-12-16	ULL	29
14	2016-11-17	8	5	2017-01-05	ULL	49
20	2016-11-17	8	5	2016-12-05	SF2	18
26	2016-11-17	8	5	2016-12-07	ULLN	20
32	2016-11-17	8	5	2016-12-15	VIN3	28
2	2016-11-17	9	5	2016-11-17	FCAF	0
8	2016-11-17	9	5	2016-12-12	NIL1	25
14	2016-11-17	9	5	2017-01-03	VRN2	47
20	2016-11-17	9	5	x	3
26	2016-11-17	9	5	2016-11-17	EFS	0
32	2016-11-17	9	5	2016-12-05	SF2	18
2	2016-11-17	10	5	2016-12-05	EFS	18
8	2016-11-17	10	5	2016-12-07	FCAF	20
14	2016-11-17	10	5	2016-12-09	FLDF	22
20	2016-11-17	10	5	2016-12-01	LHP	14
26	2016-11-17	10	5	2016-12-21	VAL	34
32	2016-11-17	10	5
2	2016-11-17	11	5	2016-12-19	LOV	32
8	2016-11-17	11	5	2016-12-07	ULLN	20
14	2016-11-17	11	5	2016-12-05	EDI	18
20	2016-11-17	11	5	2017-01-13	VRN2	57
26	2016-11-17	11	5	2016-12-05	EDIN	18
32	2016-11-17	11	5	2016-12-07	EDIN	20
2	2016-11-17	1	6	2016-12-05	NDX	18
8	2016-11-17	1	6	2016-12-21	FVEF	34
14	2016-11-17	1	6
20	2016-11-17	1	6
26	2016-11-17	1	6	2016-11-28	LHP	11
32	2016-11-17	1	6	2016-12-05	FLDF	18
2	2016-11-17	2	6	2016-11-25	flc2	8
8	2016-11-17	2	6	2016-12-12	VAL	25
14	2016-11-17	2	6	2016-12-05	FCAF	18
20	2016-11-17	2	6	2016-12-01	EDI	14
26	2016-11-17	2	6
32	2016-11-17	2	6	2016-12-07	VARN	20
2	2016-11-17	3	6	2016-12-05	SF2	18
8	2016-11-17	3	6	x	1
14	2016-11-17	3	6	2016-12-16	VIN3	29
20	2016-11-17	3	6	2016-12-12	ULLN	25
26	2016-11-17	3	6	2016-11-25	flc2	8
32	2016-11-17	3	6	2016-12-12	FVEF	25
2	2016-11-17	4	6
8	2016-11-17	4	6	2016-12-19	VIN3-1	32
14	2016-11-17	4	6	2016-11-01	EFS	-16
20	2016-11-17	4	6	2016-12-28	LOV	41
26	2016-11-17	4	6	2016-12-09	NIL1	22
32	2016-11-17	4	6	2016-12-21	VAL	34
2	2016-11-17	5	6	2016-12-05	NIL2	18
8	2016-11-17	5	6
14	2016-11-17	5	6	2016-11-28	COL	11
20	2016-11-17	5	6	2016-12-19	VIN3	32
26	2016-11-17	5	6	2016-11-25	COL	8
32	2016-11-17	5	6	2016-12-05	FCAF	18
2	2016-11-17	6	6	x	4
8	2016-11-17	6	6	x	4
14	2016-11-17	6	6	2016-12-26	BRO	39
20	2016-11-17	6	6	2016-12-26	BRO	39
26	2016-11-17	6	6	2016-12-05	SF2	18
32	2016-11-17	6	6	2016-12-07	NDX	20
2	2016-11-17	7	6	2016-12-15	VIN3-1	28
8	2016-11-17	7	6	2016-12-21	LOV	34
14	2016-11-17	7	6	2016-12-01	flc2	14
20	2016-11-17	7	6	2016-11-28	COL	11
26	2016-11-17	7	6	2016-12-19	ULL	32
32	2016-11-17	7	6	2016-12-05	BRON	18
2	2016-11-17	8	6	2016-12-21	VAR	34
8	2016-11-17	8	6	2016-11-21	EFS	4
14	2016-11-17	8	6	x	2
20	2016-11-17	8	6	2016-11-09	EFS	-8
26	2016-11-17	8	6
32	2016-11-17	8	6	2016-12-26	ULL	39
2	2016-11-17	9	6	2016-12-25	EDIN	38
8	2016-11-17	9	6
14	2016-11-17	9	6
20	2016-11-17	9	6
26	2016-11-17	9	6	2016-12-01	EDI	14
32	2016-11-17	9	6	x	4
2	2016-11-17	10	6
8	2016-11-17	10	6	2016-12-05	SF2	18
14	2016-11-17	10	6
20	2016-11-17	10	6
26	2016-11-17	10	6	x	1
32	2016-11-17	10	6	2016-12-05	NIL2	18
2	2016-11-17	11	6
8	2016-11-17	11	6	2016-11-28	flc2	11
14	2016-11-17	11	6	x	1
20	2016-11-17	11	6	2016-12-19	VAL	32
26	2016-11-17	11	6	x	BRO
32	2016-11-17	11	6	x	1
9	2016-11-30	1	1	2016-12-21	NIL1	21
19	2016-11-30	1	1	x	4
25	2016-11-30	1	1
31	2016-11-30	1	1	x	2
36	2016-11-30	1	1	2016-12-21	LOV	21
42	2016-11-30	1	1	2016-12-19	BRON	19
9	2016-11-30	2	1	2016-12-12	BRON	12
19	2016-11-30	2	1
25	2016-11-30	2	1	x	1
31	2016-11-30	2	1	2016-12-12	ULLN	12
36	2016-11-30	2	1	2016-12-12	VARN	12
42	2016-11-30	2	1	2016-12-23	VAR	23
9	2016-11-30	3	1	2016-12-12	FLDF	12
19	2016-11-30	3	1	2016-12-14	NDX	14
25	2016-11-30	3	1	2017-01-05	VRN2	36
31	2016-11-30	3	1	2016-12-09	EDI	9
36	2016-11-30	3	1	2016-12-19	ULL	19
42	2016-11-30	3	1	2016-12-14	FCAF	14
9	2016-11-30	4	1	2016-12-07	flc2	7
19	2016-11-30	4	1	2016-12-19	ULL	19
25	2016-11-30	4	1	2016-12-14	FCAF	14
31	2016-11-30	4	1	2016-12-23	VAR	23
36	2016-11-30	4	1	2016-12-16	VAR	16
42	2016-11-30	4	1
9	2016-11-30	5	1	2016-12-12	FCAF	12
19	2016-11-30	5	1	2016-12-12	FCAF	12
25	2016-11-30	5	1	2016-12-09	SF2	9
31	2016-11-30	5	1	2017-01-05	VIN3	36
36	2016-11-30	5	1	2016-12-23	VIN3-1	23
42	2016-11-30	5	1	2016-12-14	VARN	14
9	2016-11-30	6	1	2016-12-19	VAL	19
19	2016-11-30	6	1	2016-12-23	VAR	23
25	2016-11-30	6	1	2016-12-12	FVEF	12
31	2016-11-30	6	1	2016-12-14	NIL2	14
36	2016-11-30	6	1	x	4
42	2016-11-30	6	1	x	3
9	2016-11-30	7	1	2016-12-19	BRO	19
19	2016-11-30	7	1	2016-11-09	EFS	-21
25	2016-11-30	7	1	2016-12-07	EDI	7
31	2016-11-30	7	1	2016-12-12	FCAF	12
36	2016-11-30	7	1	2016-11-09	EFS	-21
42	2016-11-30	7	1
9	2016-11-30	8	1	2016-12-09	EDI	9
19	2016-11-30	8	1	2016-12-14	NIL2	14
25	2016-11-30	8	1	2016-12-16	BRO	16
31	2016-11-30	8	1	2016-11-09	EFS	-21
36	2016-11-30	8	1	2016-12-16	BRO	16
42	2016-11-30	8	1	2016-12-19	ULL	19
9	2016-11-30	9	1
19	2016-11-30	9	1	2016-12-12	SF2	12
25	2016-11-30	9	1	2016-11-03	EFS	-27
31	2016-11-30	9	1	2016-12-12	EDIN	12
36	2016-11-30	9	1	2016-12-16	NIL1	16
42	2016-11-30	9	1	2016-12-12	SF2	12
9	2016-11-30	10	1	2016-12-19	ULL	19
19	2016-11-30	10	1	2016-12-19	BRO	19
25	2016-11-30	10	1	2016-12-12	EDIN	12
31	2016-11-30	10	1
36	2016-11-30	10	1	2016-12-12	SF2	12
42	2016-11-30	10	1	2016-12-12	ULLN	12
9	2016-11-30	11	1	2016-12-12	VARN	12
19	2016-11-30	11	1	2016-12-19	FVEF	19
25	2016-11-30	11	1	2016-12-12	ULLN	12
31	2016-11-30	11	1	x	1
36	2016-11-30	11	1	2016-12-14	NIL2	14
42	2016-11-30	11	1	2017-01-26	VRN5	57
9	2016-11-30	1	2	2016-12-12	EDIN	12
19	2016-11-30	1	2	x	1
25	2016-11-30	1	2	x	3
31	2016-11-30	1	2	2016-12-14	NDX	14
36	2016-11-30	1	2
42	2016-11-30	1	2	2016-12-07	COL	7
9	2016-11-30	2	2	2017-01-03	VRN2	34
19	2016-11-30	2	2
25	2016-11-30	2	2
31	2016-11-30	2	2	2016-12-05	flc2	5
36	2016-11-30	2	2	x	3
42	2016-11-30	2	2	2016-12-12	NDX	12
9	2016-11-30	3	2	x	1
19	2016-11-30	3	2	2017-01-20	VRN2	51
25	2016-11-30	3	2	2016-12-19	NIL1	19
31	2016-11-30	3	2	x	3
36	2016-11-30	3	2
42	2016-11-30	3	2	2016-12-12	FVEF	12
9	2016-11-30	4	2	2016-12-12	ULLN	12
19	2016-11-30	4	2	2016-12-12	EDIN	12
25	2016-11-30	4	2	2017-01-18	VRN5	49
31	2016-11-30	4	2
36	2016-11-30	4	2	2016-12-12	FLDF	12
42	2016-11-30	4	2	x	2
9	2016-11-30	5	2	x	3
19	2016-11-30	5	2	2016-12-16	VAL	16
25	2016-11-30	5	2	2016-12-14	NDX	14
31	2016-11-30	5	2	2016-12-19	ULL	19
36	2016-11-30	5	2	2016-12-12	NDX	12
42	2016-11-30	5	2	2016-12-12	NIL2	12
9	2016-11-30	6	2
19	2016-11-30	6	2
25	2016-11-30	6	2	2016-12-09	LHP	9
31	2016-11-30	6	2	2016-12-12	FLDF	12
36	2016-11-30	6	2	2016-12-23	VIN3	23
42	2016-11-30	6	2	2016-12-26	VIN3-1	26
9	2016-11-30	7	2
19	2016-11-30	7	2	2016-12-05	EDI	5
25	2016-11-30	7	2	2016-12-12	NIL2	12
31	2016-11-30	7	2	2016-12-12	BRON	12
36	2016-11-30	7	2	x	2
42	2016-11-30	7	2	2016-12-07	EDI	7
9	2016-11-30	8	2	x	4
19	2016-11-30	8	2	2016-12-07	flc2	7
25	2016-11-30	8	2	2016-12-12	VARN	12
31	2016-11-30	8	2	2016-12-21	VIN3-1	21
36	2016-11-30	8	2	2016-12-12	ULLN	12
42	2016-11-30	8	2	2016-12-21	LOV	21
9	2016-11-30	9	2
19	2016-11-30	9	2	2016-12-19	VIN3-1	19
25	2016-11-30	9	2
31	2016-11-30	9	2	2016-12-12	VARN	12
36	2016-11-30	9	2	2016-12-12	FCAF	12
42	2016-11-30	9	2	x	1
9	2016-11-30	10	2	x	2
19	2016-11-30	10	2	2016-12-14	VARN	14
25	2016-11-30	10	2	2016-12-07	COL	7
31	2016-11-30	10	2	2016-12-12	SF2	12
36	2016-11-30	10	2	2016-12-12	BRON	12
42	2016-11-30	10	2	2016-11-03	EFS	-27
9	2016-11-30	11	2	2016-12-12	NIL2	12
19	2016-11-30	11	2	2016-12-12	BRON	12
25	2016-11-30	11	2	2016-12-16	VAR	16
31	2016-11-30	11	2	2017-01-11	VRN5	42
36	2016-11-30	11	2	2017-01-16	VRN5	47
42	2016-11-30	11	2	2016-12-23	BRO	23
9	2016-11-30	1	3	2016-12-21	VAR	21
19	2016-11-30	1	3	2016-12-23	LOV	23
25	2016-11-30	1	3	2016-12-09	flc2	9
31	2016-11-30	1	3	x	4
36	2016-11-30	1	3	2016-12-07	EDI	7
42	2016-11-30	1	3	x	4
9	2016-11-30	2	3	2016-12-14	NDX	14
19	2016-11-30	2	3	2016-12-09	LHP	9
25	2016-11-30	2	3	2016-12-14	BRON	14
31	2016-11-30	2	3	2016-12-19	VAL	19
36	2016-11-30	2	3	x	1
42	2016-11-30	2	3
9	2016-11-30	3	3	2016-12-26	VIN3-1	26
19	2016-11-30	3	3	2016-12-12	ULLN	12
25	2016-11-30	3	3	2016-12-19	LOV	19
31	2016-11-30	3	3	2016-12-09	LHP	9
36	2016-11-30	3	3	2016-12-05	COL	5
42	2016-11-30	3	3
9	2016-11-30	4	3	2016-12-21	LOV	21
19	2016-11-30	4	3	x	3
25	2016-11-30	4	3	x	2
31	2016-11-30	4	3
36	2016-11-30	4	3
42	2016-11-30	4	3	2016-12-16	VAL	16
9	2016-11-30	5	3	2016-12-23	VIN3	23
19	2016-11-30	5	3	2016-12-12	FLDF	12
25	2016-11-30	5	3	2016-12-12	FLDF	12
31	2016-11-30	5	3
36	2016-11-30	5	3	2016-12-09	EDIN	9
42	2016-11-30	5	3	2016-12-12	FLDF	12
9	2016-11-30	6	3	2016-12-12	SF2	12
19	2016-11-30	6	3
25	2016-11-30	6	3
31	2016-11-30	6	3	2016-12-07	COL	7
36	2016-11-30	6	3	2016-12-07	flc2	7
42	2016-11-30	6	3	2016-12-07	LHP	7
9	2016-11-30	7	3	2017-01-03	VRN5	34
19	2016-11-30	7	3	x	2
25	2016-11-30	7	3	2016-12-23	VIN3-1	23
31	2016-11-30	7	3	2016-12-23	LOV	23
36	2016-11-30	7	3	2016-12-12	FVEF	12
42	2016-11-30	7	3	2016-12-19	VIN3	19
9	2016-11-30	8	3	2016-11-09	EFS	-21
19	2016-11-30	8	3	2016-12-16	NIL1	16
25	2016-11-30	8	3	x	4
31	2016-11-30	8	3	2016-12-26	VRN2	26
36	2016-11-30	8	3
42	2016-11-30	8	3	2016-12-19	NIL1	19
9	2016-11-30	9	3	2016-12-12	FVEF	12
19	2016-11-30	9	3	2017-01-16	VRN5	47
25	2016-11-30	9	3	2016-12-28	VIN3	28
31	2016-11-30	9	3	2016-12-07	FVEF	7
36	2016-11-30	9	3	2017-02-01	VRN2	63
42	2016-11-30	9	3	2016-12-03	VRN2	3
9	2016-11-30	10	3	2016-12-07	COL	7
19	2016-11-30	10	3	2016-12-05	COL	5
25	2016-11-30	10	3	2016-12-16	ULL	16
31	2016-11-30	10	3	2016-12-19	NIL1	19
36	2016-11-30	10	3	2016-12-09	LHP	9
42	2016-11-30	10	3	2016-12-09	EDIN	9
9	2016-11-30	11	3	2016-12-09	LHP	9
19	2016-11-30	11	3	2016-12-23	VIN3	23
25	2016-11-30	11	3	2016-12-23	VAL	23
31	2016-11-30	11	3	2016-12-19	BRO	19
36	2016-11-30	11	3	2016-12-16	VAL	16
42	2016-11-30	11	3	2016-12-05	flc2	5
9	2016-11-30	1	4	2016-12-19	LOV	19
19	2016-11-30	1	4	2016-12-23	VAL	23
25	2016-11-30	1	4	2016-12-14	NDX	14
31	2016-11-30	1	4
36	2016-11-30	1	4	2016-12-12	EDIN	12
42	2016-11-30	1	4	2016-12-12	SF2	12
9	2016-11-30	2	4	x	4
19	2016-11-30	2	4	x	3
25	2016-11-30	2	4	2016-12-14	ULLN	14
31	2016-11-30	2	4	2017-01-09	ULL	40
36	2016-11-30	2	4	2017-01-13	VRN2	44
42	2016-11-30	2	4	2016-12-12	ULLN	12
9	2016-11-30	3	4	2016-12-23	VRN5	23
19	2016-11-30	3	4	2016-12-12	ULLN	12
25	2016-11-30	3	4	2016-12-12	FVEF	12
31	2016-11-30	3	4	2016-12-14	VARN	14
36	2016-11-30	3	4	2016-12-14	ULLN	14
42	2016-11-30	3	4	2016-12-12	BRON	12
9	2016-11-30	4	4
19	2016-11-30	4	4	2016-12-19	VAR	19
25	2016-11-30	4	4	2016-12-23	VIN3-1	23
31	2016-11-30	4	4	2016-11-23	EFS	-7
36	2016-11-30	4	4
42	2016-11-30	4	4	2017-01-20	VRN5	51
9	2016-11-30	5	4	2016-12-16	VAL	16
19	2016-11-30	5	4	2016-12-14	FVEF	14
25	2016-11-30	5	4	2016-12-19	BRO	19
31	2016-11-30	5	4	2016-12-26	VIN3	26
36	2016-11-30	5	4	x	3
42	2016-11-30	5	4
9	2016-11-30	6	4	x	2
19	2016-11-30	6	4	2016-12-12	NIL2	12
25	2016-11-30	6	4	x	FCAF
31	2016-11-30	6	4
36	2016-11-30	6	4	2016-12-12	FCAF	12
42	2016-11-30	6	4	2016-12-12	FLDF	12
9	2016-11-30	7	4	2016-12-12	ULLN	12
19	2016-11-30	7	4
25	2016-11-30	7	4	2016-12-16	LOV	16
31	2016-11-30	7	4	2016-12-12	ULLN	12
36	2016-11-30	7	4	x	1
42	2016-11-30	7	4	x	2
9	2016-11-30	8	4	2016-12-05	COL	5
19	2016-11-30	8	4	2016-12-09	LHP	9
25	2016-11-30	8	4	2016-12-19	ULL	19
31	2016-11-30	8	4	x	3
36	2016-11-30	8	4	2016-11-09	EFS	-21
42	2016-11-30	8	4	2016-12-12	NDX	12
9	2016-11-30	9	4	2016-12-26	VIN3	26
19	2016-11-30	9	4
25	2016-11-30	9	4
31	2016-11-30	9	4	2016-12-07	flc2	7
36	2016-11-30	9	4
42	2016-11-30	9	4	2016-12-26	VIN3	26
9	2016-11-30	10	4	2016-12-19	VAR	19
19	2016-11-30	10	4	2016-12-12	BRON	12
25	2016-11-30	10	4	2016-12-16	VAR	16
31	2016-11-30	10	4	2016-12-14	FVEF	14
36	2016-11-30	10	4	x	4
42	2016-11-30	10	4	2016-12-05	COL	5
9	2016-11-30	11	4	2016-12-09	SF2	9
19	2016-11-30	11	4	x	2
25	2016-11-30	11	4	2017-01-03	VRN5	34
31	2016-11-30	11	4	2016-12-19	BRO	19
36	2016-11-30	11	4
42	2016-11-30	11	4	2016-12-16	ULL	16
9	2016-11-30	1	5	2016-12-12	NIL2	12
19	2016-11-30	1	5	2016-12-28	VIN3	28
25	2016-11-30	1	5	2016-12-21	VAL	21
31	2016-11-30	1	5	2017-01-26	VRN2	57
36	2016-11-30	1	5	2016-12-19	VAL	19
42	2016-11-30	1	5	2017-01-03	BRO	34
9	2016-11-30	2	5	2016-12-07	flc2	7
19	2016-11-30	2	5	2016-12-07	EDI	7
25	2016-11-30	2	5	2016-11-09	EFS	-21
31	2016-11-30	2	5	2016-12-09	EDI	9
36	2016-11-30	2	5	2016-12-12	FLDF	12
42	2016-11-30	2	5
9	2016-11-30	3	5	2017-01-26	VRN2	57
19	2016-11-30	3	5	2016-12-14	NDX	14
25	2016-11-30	3	5	2016-12-05	COL	5
31	2016-11-30	3	5	2016-12-12	FLDF	12
36	2016-11-30	3	5	2016-12-12	NIL2	12
42	2016-11-30	3	5	x	1
9	2016-11-30	4	5	2016-12-19	ULL	19
19	2016-11-30	4	5	2017-01-01	VRN5	32
25	2016-11-30	4	5	2016-12-12	BRON	12
31	2016-11-30	4	5	x	4
36	2016-11-30	4	5	2016-12-16	NIL1	16
42	2016-11-30	4	5	2016-12-12	EDIN	12
9	2016-11-30	5	5	2016-12-12	BRON	12
19	2016-11-30	5	5	2016-12-05	COL	5
25	2016-11-30	5	5
31	2016-11-30	5	5	2017-01-11	VRN5	42
36	2016-11-30	5	5	2016-12-26	VIN3	26
42	2016-11-30	5	5	2016-12-09	EDI	9
9	2016-11-30	6	5	x	3
19	2016-11-30	6	5	2016-12-12	VARN	12
25	2016-11-30	6	5	x	2
31	2016-11-30	6	5	2016-12-12	BRON	12
36	2016-11-30	6	5	2016-12-23	VIN3-1	23
42	2016-11-30	6	5	2016-12-19	VAR	19
9	2016-11-30	7	5	2016-12-23	VIN3-1	23
19	2016-11-30	7	5
25	2016-11-30	7	5	2016-12-09	EDIN	9
31	2016-11-30	7	5	2016-12-19	LOV	19
36	2016-11-30	7	5	2016-12-23	BRO	23
42	2016-11-30	7	5	2016-12-28	VRN2	28
9	2016-11-30	8	5	2016-12-09	LHP	9
19	2016-11-30	8	5	2016-12-12	FLDF	12
25	2016-11-30	8	5	2016-12-07	flc2	7
31	2016-11-30	8	5	2016-12-19	NIL1	19
36	2016-11-30	8	5	2016-12-09	LHP	9
42	2016-11-30	8	5
9	2016-11-30	9	5
19	2016-11-30	9	5	2016-12-12	EDIN	12
25	2016-11-30	9	5	2016-12-12	NIL2	12
31	2016-11-30	9	5
36	2016-11-30	9	5	2016-12-30	VRN5	30
42	2016-11-30	9	5	2016-11-03	EFS	-27
9	2016-11-30	10	5	2016-12-12	VARN	12
19	2016-11-30	10	5	2016-12-16	LOV	16
25	2016-11-30	10	5
31	2016-11-30	10	5
36	2016-11-30	10	5	2016-12-12	NDX	12
42	2016-11-30	10	5	2016-12-16	VAL	16
9	2016-11-30	11	5
19	2016-11-30	11	5	2016-12-02	EFS	2
25	2016-11-30	11	5	x	3
31	2016-11-30	11	5	2016-12-19	VAR	19
36	2016-11-30	11	5	2016-12-05	flc2	5
42	2016-11-30	11	5	2016-12-07	flc2	7
9	2016-11-30	1	6	dead	NDX
19	2016-11-30	1	6
25	2016-11-30	1	6
31	2016-11-30	1	6	2016-12-12	FCAF	12
36	2016-11-30	1	6	2016-12-28	FVEF	28
42	2016-11-30	1	6	2016-12-12	LHP	12
9	2016-11-30	2	6
19	2016-11-30	2	6	2016-12-09	flc2	9
25	2016-11-30	2	6	2016-12-12	VARN	12
31	2016-11-30	2	6	2016-12-19	VIN3-1	19
36	2016-11-30	2	6
42	2016-11-30	2	6	2016-12-16	NIL1	16
9	2016-11-30	3	6	2016-12-16	NIL1	16
19	2016-11-30	3	6	2016-12-23	VIN3-1	23
25	2016-11-30	3	6	2016-12-07	EDI	7
31	2016-11-30	3	6	2016-12-12	NIL2	12
36	2016-11-30	3	6	2016-12-12	BRON	12
42	2016-11-30	3	6	2016-12-12	FCAF	12
9	2016-11-30	4	6	2016-11-09	EFS	-21
19	2016-11-30	4	6	2016-12-12	FCAF	12
25	2016-11-30	4	6	x	4
31	2016-11-30	4	6	x	1
36	2016-11-30	4	6	2016-12-07	COL	7
42	2016-11-30	4	6	2016-12-16	VARN	16
9	2016-11-30	5	6	2016-12-14	FLDF	14
19	2016-11-30	5	6	2016-12-16	NIL1	16
25	2016-11-30	5	6	2016-12-12	SF2	12
31	2016-11-30	5	6	2016-12-12	SF2	12
36	2016-11-30	5	6	x	2
42	2016-11-30	5	6	x	3
9	2016-11-30	6	6	x	1
19	2016-11-30	6	6	2016-12-23	BRO	23
25	2016-11-30	6	6	2016-12-09	LHP	9
31	2016-11-30	6	6	2016-12-12	EDIN	12
36	2016-11-30	6	6	2016-12-16	ULL	16
42	2016-11-30	6	6	x	4
9	2016-11-30	7	6	2016-12-12	FVEF	12
19	2016-11-30	7	6	2016-12-09	SF2	9
25	2016-11-30	7	6	2016-12-19	NIL1	19
31	2016-11-30	7	6	2016-12-12	LHP	12
36	2016-11-30	7	6	2016-12-19	LOV	19
42	2016-11-30	7	6	2016-12-19	LOV	19
9	2016-11-30	8	6	2016-12-12	EDIN	12
19	2016-11-30	8	6	x	4
25	2016-11-30	8	6	2016-12-12	FLDF	12
31	2016-11-30	8	6	2016-12-12	NDX	12
36	2016-11-30	8	6	2016-12-12	SF2	12
42	2016-11-30	8	6	2016-12-16	VIN3-1	16
9	2016-11-30	9	6	2016-12-07	EDI	7
19	2016-11-30	9	6	2016-12-19	ULL	19
25	2016-11-30	9	6	x	1
31	2016-11-30	9	6	x	2
36	2016-11-30	9	6	2016-12-12	EDI	12
42	2016-11-30	9	6	2016-12-09	FVEF	9
9	2016-11-30	10	6	2016-12-12	FCAF	12
19	2016-11-30	10	6	2017-01-23	VRN2	54
25	2016-11-30	10	6	2016-12-23	VIN3	23
31	2016-11-30	10	6	2016-12-07	COL	7
36	2016-11-30	10	6	2016-12-14	VARN	14
42	2016-11-30	10	6	2016-12-12	NIL2	12
9	2016-11-30	11	6	2016-12-19	BRO	19
19	2016-11-30	11	6	x	1
25	2016-11-30	11	6	2017-01-26	VRN2	57
31	2016-11-30	11	6	2016-12-19	VAL	19
36	2016-11-30	11	6	2016-12-21	VAR	21
42	2016-11-30	11	6
1	2016-12-21	1	1	2016-12-28	flc2	7
7	2016-12-21	1	1	2017-01-03	LOV	13
15	2016-12-21	1	1	2016-12-30	FVEF	9
29	2016-12-21	1	1	2016-12-30	ULLN	9
38	2016-12-21	1	1	2017-01-06	VAR	16
40	2016-12-21	1	1	x	4
1	2016-12-21	2	1
7	2016-12-21	2	1	2016-12-28	EDIN	7
15	2016-12-21	2	1
29	2016-12-21	2	1	2016-11-17	EFS	-34
38	2016-12-21	2	1	2016-12-26	flc2	5
40	2016-12-21	2	1	2016-12-26	NIL2	5
1	2016-12-21	3	1	2017-01-20	VIN3	30
7	2016-12-21	3	1	2016-12-28	FLDF	7
15	2016-12-21	3	1	2016-12-26	LHP	5
29	2016-12-21	3	1	2016-12-23	flc2	2
38	2016-12-21	3	1	2016-12-30	ULLN	9
40	2016-12-21	3	1	x	NIL1
1	2016-12-21	4	1	2016-12-26	LHP	5
7	2016-12-21	4	1	2016-12-26	COL	5
15	2016-12-21	4	1	2017-01-05	VIN3	15
29	2016-12-21	4	1	2016-12-26	LHP	5
38	2016-12-21	4	1	2016-12-28	SF2	7
40	2016-12-21	4	1	2017-01-11	VIN3	21
1	2016-12-21	5	1	2017-01-03	NDX	13
7	2016-12-21	5	1	2016-12-28	FVEF	7
15	2016-12-21	5	1	2016-12-26	BRON	5
29	2016-12-21	5	1	2017-01-03	FVEF	13
38	2016-12-21	5	1	2016-12-26	COL	5
40	2016-12-21	5	1	2016-12-30	FLDF	9
1	2016-12-21	6	1	2017-01-03	VAR	13
7	2016-12-21	6	1
15	2016-12-21	6	1	x	1
29	2016-12-21	6	1	x	3
38	2016-12-21	6	1	2016-12-26	EDIN	5
40	2016-12-21	6	1	2017-01-05	BRO	15
1	2016-12-21	7	1	x	2
7	2016-12-21	7	1	x	1
15	2016-12-21	7	1	2016-12-26	COL	5
29	2016-12-21	7	1
38	2016-12-21	7	1	x	1
40	2016-12-21	7	1	2016-12-30	BRON	9
1	2016-12-21	8	1	2017-01-03	EDIN	13
7	2016-12-21	8	1	2017-01-05	VIN3-1	15
15	2016-12-21	8	1	2017-01-05	LOV	15
29	2016-12-21	8	1	2016-12-28	VARN	7
38	2016-12-21	8	1	2017-01-30	VRN2	40
40	2016-12-21	8	1	2016-12-28	EDIN	7
1	2016-12-21	9	1	2016-12-28	SF2	7
7	2016-12-21	9	1	2016-12-26	flc2	5
15	2016-12-21	9	1	2016-12-28	NIL2	7
29	2016-12-21	9	1	2016-12-28	SF2	7
38	2016-12-21	9	1	2016-12-28	VAL	7
40	2016-12-21	9	1	2016-12-28	VARN	7
1	2016-12-21	10	1	2016-12-28	EDI	7
7	2016-12-21	10	1	2016-12-26	FCAF	5
15	2016-12-21	10	1	x	2
29	2016-12-21	10	1	2016-12-30	NIL1	9
38	2016-12-21	10	1	2016-12-26	EDI	5
40	2016-12-21	10	1
1	2016-12-21	11	1	2017-01-26	VRN5	36
7	2016-12-21	11	1
15	2016-12-21	11	1	2017-02-01	VRN2	42
29	2016-12-21	11	1	2017-01-03	VAL	13
38	2016-12-21	11	1
40	2016-12-21	11	1	2016-11-03	EFS	-48
1	2016-12-21	1	2
7	2016-12-21	1	2	2017-02-10	VRN2	51
15	2016-12-21	1	2	2017-01-05	ULL	15
29	2016-12-21	1	2	x	4
38	2016-12-21	1	2	2017-01-26	VRN5	36
40	2016-12-21	1	2	2016-12-28	FCAF	7
1	2016-12-21	2	2	2017-01-11	VIN3-1	21
7	2016-12-21	2	2
15	2016-12-21	2	2	2016-12-26	SF2	5
29	2016-12-21	2	2
38	2016-12-21	2	2	2016-11-23	EFS	-28
40	2016-12-21	2	2	2016-12-28	LHP	7
1	2016-12-21	3	2	2016-12-26	NIL2	5
7	2016-12-21	3	2	2017-01-30	VRN5	40
15	2016-12-21	3	2	2016-12-28	FLDF	7
29	2016-12-21	3	2	2016-12-23	COL	2
38	2016-12-21	3	2	2017-01-05	ULL	15
40	2016-12-21	3	2	2017-01-03	FVEF	13
1	2016-12-21	4	2	2016-12-26	BRON	5
7	2016-12-21	4	2	x	2
15	2016-12-21	4	2	2016-12-30	NIL1	9
29	2016-12-21	4	2	2017-01-09	VIN3-1	19
38	2016-12-21	4	2	2017-01-05	BRO	15
40	2016-12-21	4	2	2017-01-03	VRN2	13
1	2016-12-21	5	2	2017-01-05	NIL1	15
7	2016-12-21	5	2	2016-12-26	SF2	5
15	2016-12-21	5	2	2016-12-26	ULLN	5
29	2016-12-21	5	2	2017-01-03	NDX	13
38	2016-12-21	5	2	2016-12-26	BRON	5
40	2016-12-21	5	2	2016-12-30	VAL	9
1	2016-12-21	6	2	2016-11-30	EFS	-21
7	2016-12-21	6	2	2016-12-30	BRO	9
15	2016-12-21	6	2	2017-01-05	VRN5	15
29	2016-12-21	6	2	2016-12-23	EDI	2
38	2016-12-21	6	2	x	4
40	2016-12-21	6	2	2016-12-28	LOV	7
1	2016-12-21	7	2	2016-12-26	FLDF	5
7	2016-12-21	7	2	x	3
15	2016-12-21	7	2	x	3
29	2016-12-21	7	2	2016-12-28	FCAF	7
38	2016-12-21	7	2	2016-12-26	LHP	5
40	2016-12-21	7	2	2016-12-30	VAR	9
1	2016-12-21	8	2	2016-12-28	VARN	7
7	2016-12-21	8	2
15	2016-12-21	8	2
29	2016-12-21	8	2	x	2
38	2016-12-21	8	2	2016-12-28	NIL1	7
40	2016-12-21	8	2	2017-01-16	VRN5	26
1	2016-12-21	9	2	2017-01-26	VRN2	36
7	2016-12-21	9	2	2016-12-28	VAR	7
15	2016-12-21	9	2	2016-12-28	FCAF	7
29	2016-12-21	9	2	2017-01-09	VIN3	19
38	2016-12-21	9	2	x	3
40	2016-12-21	9	2	2016-12-23	EDI	2
1	2016-12-21	10	2	2016-12-28	LOV	7
7	2016-12-21	10	2	x	VIN3
15	2016-12-21	10	2	2016-12-23	EDI	2
29	2016-12-21	10	2	2017-01-13	VRN5	23
38	2016-12-21	10	2	2017-01-09	VIN3-1	19
40	2016-12-21	10	2	x	2
1	2016-12-21	11	2	x	4
7	2016-12-21	11	2	2016-12-30	VAL	9
15	2016-12-21	11	2	x	flc2
29	2016-12-21	11	2	2017-01-03	BRO	13
38	2016-12-21	11	2	x	2
40	2016-12-21	11	2	2016-12-21	COL	0
1	2016-12-21	1	3	2016-12-28	FCAF	7
7	2016-12-21	1	3	2016-12-30	NIL1	9
15	2016-12-21	1	3	2017-01-05	VIN3-1	15
29	2016-12-21	1	3	2017-01-05	VAR	15
38	2016-12-21	1	3
40	2016-12-21	1	3	2016-12-30	NDX	9
1	2016-12-21	2	3	2017-01-09	ULL	19
7	2016-12-21	2	3	2017-01-03	NDX	13
15	2016-12-21	2	3	2016-11-17	EFS	-34
29	2016-12-21	2	3
38	2016-12-21	2	3	2017-01-03	NDX	13
40	2016-12-21	2	3	x	3
1	2016-12-21	3	3	2016-12-28	FVEF	7
7	2016-12-21	3	3	2016-12-28	NIL2	7
15	2016-12-21	3	3	2016-12-26	EDIN	5
29	2016-12-21	3	3	2016-12-26	FLDF	5
38	2016-12-21	3	3
40	2016-12-21	3	3	2016-12-28	ULL	7
1	2016-12-21	4	3	2016-12-21	COL	0
7	2016-12-21	4	3	2016-12-26	LHP	5
15	2016-12-21	4	3	2016-12-30	VAR	9
29	2016-12-21	4	3	2016-12-30	LOV	9
38	2016-12-21	4	3	2016-12-26	VARN	5
40	2016-12-21	4	3	2016-12-28	SF2	7
1	2016-12-21	5	3	2016-12-30	ULLN	9
7	2016-12-21	5	3	2016-12-26	EDI	5
15	2016-12-21	5	3
29	2016-12-21	5	3	2017-01-03	ULL	13
38	2016-12-21	5	3
40	2016-12-21	5	3	2016-12-21	flc2	0
1	2016-12-21	6	3	2017-01-03	VAL	13
7	2016-12-21	6	3	2016-12-26	ULLN	5
15	2016-12-21	6	3	2016-12-28	VAL	7
29	2016-12-21	6	3
38	2016-12-21	6	3	2016-12-26	FCAF	5
40	2016-12-21	6	3
1	2016-12-21	7	3	x	3
7	2016-12-21	7	3	2016-12-26	BRON	5
15	2016-12-21	7	3	x	4
29	2016-12-21	7	3	x	1
38	2016-12-21	7	3	2016-12-28	FLDF	7
40	2016-12-21	7	3
1	2016-12-21	8	3
7	2016-12-21	8	3	x	4
15	2016-12-21	8	3	2016-12-26	NDX	5
29	2016-12-21	8	3	2016-12-26	BRON	5
38	2016-12-21	8	3	2016-12-28	LOV	7
40	2016-12-21	8	3	2016-12-26	ULLN	5
1	2016-12-21	9	3	2017-01-03	BRO	13
7	2016-12-21	9	3	2016-12-26	VARN	5
15	2016-12-21	9	3	2017-01-03	BRO	13
29	2016-12-21	9	3	2017-01-30	VRN2	40
38	2016-12-21	9	3	2017-01-06	VIN3	16
40	2016-12-21	9	3	x	1
1	2016-12-21	10	3
7	2016-12-21	10	3	2016-11-17	EFS	-34
15	2016-12-21	10	3	2016-12-26	VARN	5
29	2016-12-21	10	3	2016-12-26	NIL2	5
38	2016-12-21	10	3	2016-12-26	NIL2	5
40	2016-12-21	10	3	2017-01-05	VIN3-1	15
1	2016-12-21	11	3	x	1
7	2016-12-21	11	3	2016-12-30	ULL	9
15	2016-12-21	11	3
29	2016-12-21	11	3	2016-12-26	EDIN	5
38	2016-12-21	11	3	2016-12-26	FVEF	5
40	2016-12-21	11	3
1	2016-12-21	1	4	2016-12-26	VAL	5
7	2016-12-21	1	4	2017-01-05	BRO	15
15	2016-12-21	1	4	2017-01-03	VAR	13
29	2016-12-21	1	4	2017-01-05	ULL	15
38	2016-12-21	1	4	2017-01-06	BRO	16
40	2016-12-21	1	4	2016-12-26	ULLN	5
1	2016-12-21	2	4	x	4
7	2016-12-21	2	4	x	4
15	2016-12-21	2	4	2016-12-30	VAL	9
29	2016-12-21	2	4	2016-12-30	FCAF	9
38	2016-12-21	2	4	x	4
40	2016-12-21	2	4	2016-12-30	LOV	9
1	2016-12-21	3	4
7	2016-12-21	3	4	2016-12-26	EDI	5
15	2016-12-21	3	4	x	3
29	2016-12-21	3	4	2016-11-09	EFS	-42
38	2016-12-21	3	4	2016-12-26	LHP	5
40	2016-12-21	3	4	2016-12-30	VAL	9
1	2016-12-21	4	4	x	2
7	2016-12-21	4	4	2016-12-26	FVEF	5
15	2016-12-21	4	4	2016-12-23	EDI	2
29	2016-12-21	4	4	x	3
38	2016-12-21	4	4	x	2
40	2016-12-21	4	4	2017-01-09	VIN3	19
1	2016-12-21	5	4
7	2016-12-21	5	4	2016-12-28	ULLN	7
15	2016-12-21	5	4	x	1
29	2016-12-21	5	4	2017-01-09	VRN5	19
38	2016-12-21	5	4	2016-12-26	VARN	5
40	2016-12-21	5	4	2017-01-05	VIN3-1	15
1	2016-12-21	6	4	2016-12-26	flc2	5
7	2016-12-21	6	4	2016-12-26	FCAF	5
15	2016-12-21	6	4	2016-12-26	ULLN	5
29	2016-12-21	6	4	2017-01-03	BRO	13
38	2016-12-21	6	4	2016-11-17	EFS	-34
40	2016-12-21	6	4	2016-12-28	FLDF	7
1	2016-12-21	7	4	2016-12-26	BRON	5
7	2016-12-21	7	4	x	1
15	2016-12-21	7	4	2016-12-26	FLDF	5
29	2016-12-21	7	4	2016-12-26	SF2	5
38	2016-12-21	7	4	2016-12-26	SF2	5
40	2016-12-21	7	4
1	2016-12-21	8	4
7	2016-12-21	8	4	2016-11-09	EFS	-42
15	2016-12-21	8	4
29	2016-12-21	8	4	2016-12-30	VAR	9
38	2016-12-21	8	4
40	2016-12-21	8	4	x	2
1	2016-12-21	9	4	2017-01-09	VIN3-1	19
7	2016-12-21	9	4	2016-12-23	LHP	2
15	2016-12-21	9	4	2016-12-26	FCAF	5
29	2016-12-21	9	4	2016-12-26	EDIN	5
38	2016-12-21	9	4	2016-12-30	NIL1	9
40	2016-12-21	9	4	2017-01-20	VRN2	30
1	2016-12-21	10	4	2016-12-26	SF2	5
7	2016-12-21	10	4	2016-12-28	LOV	7
15	2016-12-21	10	4	2017-01-06	VIN3	16
29	2016-12-21	10	4	x	4
38	2016-12-21	10	4	2016-12-26	EDI	5
40	2016-12-21	10	4	2016-12-28	BRON	7
1	2016-12-21	11	4	x	1
7	2016-12-21	11	4	x	3
15	2016-12-21	11	4
29	2016-12-21	11	4
38	2016-12-21	11	4
40	2016-12-21	11	4	2016-12-28	ULL	7
1	2016-12-21	1	5	2016-12-28	LOV	7
7	2016-12-21	1	5	2017-01-05	ULL	15
15	2016-12-21	1	5	2016-12-28	BRON	7
29	2016-12-21	1	5
38	2016-12-21	1	5	2017-01-18	VRN5	28
40	2016-12-21	1	5	2016-12-28	SF2	7
1	2016-12-21	2	5	2016-12-26	EDI	5
7	2016-12-21	2	5	dead	VRN5
15	2016-12-21	2	5	2017-02-01	VRN2	42
29	2016-12-21	2	5	2017-02-10	VRN2	51
38	2016-12-21	2	5	2017-01-03	LOV	13
40	2016-12-21	2	5	x	4
1	2016-12-21	3	5	2017-01-11	VRN5	21
7	2016-12-21	3	5	2016-12-30	NDX	9
15	2016-12-21	3	5	2016-11-09	BRO	-42
29	2016-12-21	3	5	x	1
38	2016-12-21	3	5	2017-01-18	VRN2	28
40	2016-12-21	3	5	2017-01-05	NIL1	15
1	2016-12-21	4	5	2016-12-26	NIL2	5
7	2016-12-21	4	5	2016-12-26	EDIN	5
15	2016-12-21	4	5	2016-11-09	EFS	-42
29	2016-12-21	4	5	2016-12-26	LHP	5
38	2016-12-21	4	5	2016-12-28	NIL2	7
40	2016-12-21	4	5	2016-11-09	EFS	-42
1	2016-12-21	5	5	x	3
7	2016-12-21	5	5	2016-12-26	SF2	5
15	2016-12-21	5	5
29	2016-12-21	5	5	2016-12-30	NIL1	9
38	2016-12-21	5	5	2016-12-28	VAR	7
40	2016-12-21	5	5
1	2016-12-21	6	5	2016-12-26	FVEF	5
7	2016-12-21	6	5	x	2
15	2016-12-21	6	5	2016-12-30	NIL1	9
29	2016-12-21	6	5
38	2016-12-21	6	5	2017-01-09	VIN3-1	19
40	2016-12-21	6	5	2017-01-05	BRO	15
1	2016-12-21	7	5	2016-12-26	ULLN	5
7	2016-12-21	7	5	2016-12-26	FLDF	5
15	2016-12-21	7	5	2016-12-26	LHP	5
29	2016-12-21	7	5	x	2
38	2016-12-21	7	5	2016-12-14	COL	-7
40	2016-12-21	7	5	2017-01-03	VAR	13
1	2016-12-21	8	5	2016-11-17	EFS	-34
7	2016-12-21	8	5
15	2016-12-21	8	5	x	2
29	2016-12-21	8	5	2016-12-28	LOV	7
38	2016-12-21	8	5	2016-12-28	FCAF	7
40	2016-12-21	8	5	2016-12-26	EDIN	5
1	2016-12-21	9	5	2016-12-28	VARN	7
7	2016-12-21	9	5	2016-12-26	VARN	5
15	2016-12-21	9	5	2017-01-05	VIN3-1	15
29	2016-12-21	9	5	2016-12-26	FLDF	5
38	2016-12-21	9	5
40	2016-12-21	9	5	x	3
1	2016-12-21	10	5	2016-12-26	LHP	5
7	2016-12-21	10	5
15	2016-12-21	10	5
29	2016-12-21	10	5	2016-12-26	ULLN	5
38	2016-12-21	10	5	2016-12-26	EDIN	5
40	2016-12-21	10	5	2016-12-21	flc2	0
1	2016-12-21	11	5	2017-01-03	BRO	13
7	2016-12-21	11	5	2016-12-26	BRON	5
15	2016-12-21	11	5	2016-12-23	EDIN	2
29	2016-12-21	11	5	2016-12-30	VAL	9
38	2016-12-21	11	5	2016-12-23	flc2	2
40	2016-12-21	11	5	2017-01-20	VRN5	30
1	2016-12-21	1	6	2017-01-05	VAR	15
7	2016-12-21	1	6	2017-01-16	VIN3-1	26
15	2016-12-21	1	6	2016-12-26	flc2	5
29	2016-12-21	1	6	2016-12-28	NDX	7
38	2016-12-21	1	6	2017-01-03	VAL	13
40	2016-12-21	1	6	2016-12-30	NDX	9
1	2016-12-21	2	6	2017-01-03	ULL	13
7	2016-12-21	2	6	2016-12-28	NIL1	7
15	2016-12-21	2	6	2016-12-28	FVEF	7
29	2016-12-21	2	6	2016-12-26	flc2	5
38	2016-12-21	2	6
40	2016-12-21	2	6	2016-12-28	EDI	7
1	2016-12-21	3	6	2017-01-09	VIN3	19
7	2016-12-21	3	6
15	2016-12-21	3	6	2016-12-28	VARN	7
29	2016-12-21	3	6	2017-01-11	VIN3	21
38	2016-12-21	3	6	2016-12-28	NDX	7
40	2016-12-21	3	6	2016-12-26	COL	5
1	2016-12-21	4	6	2016-12-28	NIL1	7
7	2016-12-21	4	6	2016-12-23	COL	2
15	2016-12-21	4	6	2017-01-03	ULL	13
29	2016-12-21	4	6	2016-12-30	COL	9
38	2016-12-21	4	6	2017-01-09	VIN3	19
40	2016-12-21	4	6	x	1
1	2016-12-21	5	6	2016-12-28	NDX	7
7	2016-12-21	5	6	2016-12-30	VAR	9
15	2016-12-21	5	6	2016-12-26	NIL2	5
29	2016-12-21	5	6	2016-12-28	NIL2	7
38	2016-12-21	5	6	x	ULLN
40	2016-12-21	5	6	2016-12-28	NIL2	7
1	2016-12-21	6	6	2016-12-26	EDIN	5
7	2016-12-21	6	6	2016-12-26	NIL2	5
15	2016-12-21	6	6	2017-01-23	VRN5	33
29	2016-12-21	6	6	2017-01-09	VIN3-1	19
38	2016-12-21	6	6	2016-12-26	FLDF	5
40	2016-12-21	6	6	2016-12-26	LHP	5
1	2016-12-21	7	6	2016-12-28	FLDF	7
7	2016-12-21	7	6
15	2016-12-21	7	6	2016-12-21	COL	0
29	2016-12-21	7	6	2016-12-26	BRON	5
38	2016-12-21	7	6	2016-12-26	FVEF	5
40	2016-12-21	7	6
1	2016-12-21	8	6
7	2016-12-21	8	6	2016-12-30	VAL	9
15	2016-12-21	8	6	2016-12-26	NDX	5
29	2016-12-21	8	6	2016-12-26	VARN	5
38	2016-12-21	8	6	2016-12-26	ULL	5
40	2016-12-21	8	6	2016-12-30	FCAF	9
1	2016-12-21	9	6	2016-12-23	COL	2
7	2016-12-21	9	6	2016-12-21	flc2	0
15	2016-12-21	9	6	x	4
29	2016-12-21	9	6	2016-12-26	FVEF	5
38	2016-12-21	9	6	x	1
40	2016-12-21	9	6	2016-12-28	VARN	7
1	2016-12-21	10	6	2017-01-23	VRN2	33
7	2016-12-21	10	6	2017-01-03	VIN3	13
15	2016-12-21	10	6	2016-12-26	SF2	5
29	2016-12-21	10	6
38	2016-12-21	10	6	2016-12-26	BRON	5
40	2016-12-21	10	6
1	2016-12-21	11	6	2016-12-30	FCAF	9
7	2016-12-21	11	6	2017-01-13	VRN2	23
15	2016-12-21	11	6	2016-12-28	LOV	7
29	2016-12-21	11	6	2016-12-23	EDI	2
38	2016-12-21	11	6	x	3
40	2016-12-21	11	6	2016-12-30	FVEF	9
3	2017-01-26	1	1	2017-01-30	NIL1	4
11	2017-01-26	1	1	dead	VRN5
17	2017-01-26	1	1	dead	SF2
23	2017-01-26	1	1	2017-02-01	FCAF	6
33	2017-01-26	1	1	2017-01-20	ULLN	-6
39	2017-01-26	1	1	2017-02-10	VRN5	15
3	2017-01-26	2	1
11	2017-01-26	2	1	x	2
17	2017-01-26	2	1	2017-01-30	NDX	4
23	2017-01-26	2	1	2016-12-21	COL	-36
33	2017-01-26	2	1	2017-02-01	NDX	6
39	2017-01-26	2	1
3	2017-01-26	3	1	2017-01-09	COL	-17
11	2017-01-26	3	1	2017-01-27	NIL1	1
17	2017-01-26	3	1	2017-01-30	VAR	4
23	2017-01-26	3	1	x	2
33	2017-01-26	3	1	2017-01-13	FCAF	-13
39	2017-01-26	3	1	2017-01-18	NIL1	-8
3	2017-01-26	4	1	x	2
[truncated: 377 more rows]

## Sheet: Norwich seed mass
Tray No:	Move date	Row	Column	Flowering date	Genotype	Flowering from move	Flowering date from April	Seed Mass (g)
4	2016-10-21	2	3	2016-12-09	Bro NIL	49	2016-12-09	0.0353
4	2016-10-21	6	5	2016-12-01	Bro NIL	41	2016-12-01	0.267
4	2016-10-21	8	3	2016-12-07	Bro NIL	47	2016-12-07	0.35
4	2016-10-21	4	5	2016-12-14	Bro NIL	54	2016-12-14	0.1781
4	2016-10-21	9	2	2016-12-12	Bro NIL	52	2016-12-12	0.017
4	2016-10-21	5	5	2016-12-05	Bro NIL	45	2016-12-05	0.3058
4	2016-10-21	3	2	2016-12-12	Bro NIL	52	2016-12-12	0.223
4	2016-10-21	1	5	2016-12-19	Bro NIL	59	2016-12-19	0.1167
4	2016-10-21	10	2	2016-12-01	Bro NIL	41	2016-12-01	0.1922
4	2016-10-21	11	4	2016-12-12	Bro NIL	52	2016-12-12
4	2016-10-21	7	1	2016-12-12	Bro NIL	52	2016-12-12	0.1168
4	2016-10-21	4	5	2017-01-20	Bro NIL	91	2017-01-20	0.035
4	2016-11-17	1	2	2016-12-05	Bro NIL	18	2016-12-05
4	2016-11-17	7	5	2016-12-05	Bro NIL	18	2016-12-05	0.235
4	2016-11-17	10	1	2016-12-05	Bro NIL	18	2016-12-05	0.167
4	2016-11-17	7	5	2016-12-09	Bro NIL	22	2016-12-09	0.2361
4	2016-11-17	5	1	2016-12-05	Bro NIL	18	2016-12-05	0.183
4	2016-11-17	9	4	2016-12-09	Bro NIL	22	2016-12-09	0.178
4	2016-11-17	11	3	2016-12-05	Bro NIL	18	2016-12-05	0.1525
4	2016-11-17	6	4	2016-12-05	Bro NIL	18	2016-12-05	0.2496
10	2016-11-17	8	3	2016-12-05	Bro NIL	18	2016-12-05	0.166
10	2016-11-17	1	4	2016-12-05	Bro NIL	18	2016-12-05	0.195
10	2016-11-17	3	3	2016-12-05	Bro NIL	18	2016-12-05	0.234
10	2016-11-17	7	6	2016-12-05	Bro NIL	18	2016-12-05	0.255
10	2016-10-21	1	2	2016-12-05	Col FRI	45	2016-12-05	0.2025
10	2016-10-21	5	6	2016-11-28	Col FRI	38	2016-11-28	0.1605
10	2016-10-21	10	3	2016-12-05	Col FRI	45	2016-12-05	0.09
10	2016-10-21	11	6	2016-12-12	Col FRI	52	2016-12-12	0.092
10	2016-10-21	8	1	2016-11-25	Col FRI	35	2016-11-25	0.0256
10	2016-10-21	3	5	2016-12-01	Col FRI	41	2016-12-01	0.2236
10	2016-10-21	7	2	2016-12-05	Col FRI	45	2016-12-05	0.2418
10	2016-10-21	10	6	dead	Col FRI		dead	0
10	2016-10-21	11	3	2016-12-01	Col FRI	41	2016-12-01
10	2016-10-21	8	6	2016-11-28	Col FRI	38	2016-11-28	0.343
10	2016-10-21	9	3	2016-12-05	Col FRI	45	2016-12-05	0.2229
10	2016-10-21	3	5	2016-12-09	Col FRI	49	2016-12-09	0.233
10	2016-11-17	10	1	2016-12-05	Col FRI	18	2016-12-05
10	2016-11-17	3	6	2016-12-05	Col FRI	18	2016-12-05	0.15
10	2016-11-17	11	3	2016-12-05	Col FRI	18	2016-12-05	0.177
10	2016-11-17	10	6	2016-12-05	Col FRI	18	2016-12-05	0.2433
16	2016-11-17	9	3	2016-12-07	Col FRI	20	2016-12-07	0.1954
16	2016-11-17	5	4	2016-12-05	Col FRI	18	2016-12-05
16	2016-11-17	11	2	2016-12-01	Col FRI	14	2016-12-01
16	2016-11-17	8	5	2016-12-05	Col FRI	18	2016-12-05	0.2249
16	2016-11-17	4	3	2016-12-05	Col FRI	18	2016-12-05	0.206
16	2016-11-17	6	6	2016-12-05	Col FRI	18	2016-12-05	0.162
16	2016-11-17	7	1	2016-12-05	Col FRI	18	2016-12-05	0.264
16	2016-11-17	9	5	2016-12-05	Col FRI	18	2016-12-05
16	2016-10-21	4	3	2016-11-28	Edi NIL	38	2016-11-28	0.2285
16	2016-10-21	4	5	2016-11-28	Edi NIL	38	2016-11-28	0.24
16	2016-10-21	9	3	2016-12-07	Edi NIL	47	2016-12-07	0.1795
16	2016-10-21	2	6	2016-12-05	Edi NIL	45	2016-12-05	0.2047
16	2016-10-21	7	3	2016-12-05	Edi NIL	45	2016-12-05	0.394
16	2016-10-21	8	4	2016-12-01	Edi NIL	41	2016-12-01	0.0871
16	2016-10-21	9	3	2016-12-05	Edi NIL	45	2016-12-05	0.1505
16	2016-10-21	2	4	2016-12-12	Edi NIL	52	2016-12-12	0.1675
16	2016-10-21	9	2	2016-12-05	Edi NIL	45	2016-12-05	0.2443
16	2016-10-21	8	4	2016-12-09	Edi NIL	49	2016-12-09	0.2036
16	2016-10-21	6	1	2016-11-28	Edi NIL	38	2016-11-28	0.1776
16	2016-10-21	5	6	2016-12-01	Edi NIL	41	2016-12-01	0.239
22	2016-11-17	4	2	2016-12-07	Edi NIL	20	2016-12-07	0.15
22	2016-11-17	9	6	2016-12-25	Edi NIL	38	2016-12-25
22	2016-11-17	10	2	2016-12-05	Edi NIL	18	2016-12-05	0.179
22	2016-11-17	2	5	2016-12-01	Edi NIL	14	2016-12-01	0.1797
22	2016-11-17	5	2	2016-12-01	Edi NIL	14	2016-12-01	0.147
22	2016-11-17	1	4	2016-12-05	Edi NIL	18	2016-12-05	0.191
22	2016-11-17	11	1	2016-12-05	Edi NIL	18	2016-12-05
22	2016-11-17	2	5	2016-12-05	Edi NIL	18	2016-12-05	0.1453
22	2016-11-17	7	2	2016-12-09	Edi NIL	22	2016-12-09	0.189
22	2016-11-17	11	5	2016-12-05	Edi NIL	18	2016-12-05	0.45
22	2016-11-17	8	3	2016-12-05	Edi NIL	18	2016-12-05	0.226
22	2016-11-17	11	5	2016-12-07	Edi NIL	20	2016-12-07	0.45
22	2016-10-21	1	3	2016-12-05	Lov NIL2	45	2016-12-05	0.2756
22	2016-10-21	11	5	2016-12-19	Lov NIL2	59	2016-12-19	0.0922
22	2016-10-21	7	1	2016-12-09	Lov NIL2	49	2016-12-09	0.15
22	2016-10-21	11	5	2016-12-21	Lov NIL2	61	2016-12-21	0.1062
22	2016-10-21	3	2	2016-12-09	Lov NIL2	49	2016-12-09	0.1511
22	2016-10-21	9	5	2016-12-05	Lov NIL2	45	2016-12-05	0.274
22	2016-10-21	8	3	dead	Lov NIL2		dead	0
22	2016-10-21	9	5	2017-02-10	Lov NIL2	112	2017-02-10	0.045
28	2016-10-21	6	3	2016-12-09	Lov NIL2	49	2016-12-09	0.319
28	2016-10-21	7	4	2016-12-14	Lov NIL2	54	2016-12-14
28	2016-10-21	4	2	x	Lov NIL2		x
28	2016-10-21	6	4	2016-12-19	Lov NIL2	59	2016-12-19	0.157
28	2016-11-17	4	3	2016-12-05	Lov NIL2	18	2016-12-05	0.245
28	2016-11-17	5	6	2016-12-05	Lov NIL2	18	2016-12-05	0.317
28	2016-11-17	6	3	2016-12-16	Lov NIL2	29	2016-12-16	0.1602
28	2016-11-17	10	4	2016-12-05	Lov NIL2	18	2016-12-05	0.0094
28	2016-11-17	7	2	2016-12-05	Lov NIL2	18	2016-12-05
28	2016-11-17	11	4	2016-12-05	Lov NIL2	18	2016-12-05	0.214
28	2016-11-17	5	1	2016-12-07	Lov NIL2	20	2016-12-07	0.182
28	2016-11-17	2	4	2016-12-12	Lov NIL2	25	2016-12-12	0.1618
28	2016-11-17	9	1	2016-12-07	Lov NIL2	20	2016-12-07	0.126
28	2016-11-17	7	4	2016-12-05	Lov NIL2	18	2016-12-05	0.179
28	2016-11-17	2	1	2016-12-05	Lov NIL2	18	2016-12-05	0.1424
28	2016-11-17	10	6	2016-12-05	Lov NIL2	18	2016-12-05	0.071
28	2016-10-21	11	3	2016-11-25	Ull NIL	35	2016-11-25	0.258
28	2016-10-21	9	6	2016-11-25	Ull NIL	35	2016-11-25	0.1726
28	2016-10-21	7	2	2016-12-07	Ull NIL	47	2016-12-07	0.106
28	2016-10-21	9	5	2016-11-25	Ull NIL	35	2016-11-25	0.25
34	2016-10-21	1	2	2016-11-25	Ull NIL	35	2016-11-25	0.2934
34	2016-10-21	2	5	2016-11-28	Ull NIL	38	2016-11-28	0.339
34	2016-10-21	11	2	2016-12-09	Ull NIL	49	2016-12-09	0.072
34	2016-10-21	6	6	2016-12-01	Ull NIL	41	2016-12-01	0.0717
34	2016-10-21	11	2	2016-12-05	Ull NIL	45	2016-12-05	0.171
34	2016-10-21	6	4	2016-12-14	Ull NIL	54	2016-12-14
34	2016-10-21	7	2	2016-12-07	Ull NIL	47	2016-12-07	0.0508
34	2016-10-21	11	5	2016-12-07	Ull NIL	47	2016-12-07	0.071
34	2016-11-17	3	3	2016-12-12	Ull NIL	25	2016-12-12	0.142
34	2016-11-17	3	4	2016-12-05	Ull NIL	18	2016-12-05	0.312
34	2016-11-17	8	1	2016-12-07	Ull NIL	20	2016-12-07	0.1735
34	2016-11-17	11	5	2016-12-07	Ull NIL	20	2016-12-07	0.2506
34	2016-11-17	3	2	2016-12-07	Ull NIL	20	2016-12-07	0.158
34	2016-11-17	3	4	2016-12-07	Ull NIL	20	2016-12-07	0.134
34	2016-11-17	9	1	2016-12-05	Ull NIL	18	2016-12-05	0.1487
34	2016-11-17	3	6	2016-12-12	Ull NIL	25	2016-12-12	0.1281
34	2016-11-17	2	2	2016-12-12	Ull NIL	25	2016-12-12	0.088
34	2016-11-17	8	5	2016-12-07	Ull NIL	20	2016-12-07	0.202
34	2016-11-17	1	2	2016-12-07	Ull NIL	20	2016-12-07	0.0054
34	2016-11-17	10	4	2016-12-07	Ull NIL	20	2016-12-07	0.1843
2	2016-10-21	8	3	2016-12-28	Var NIL	68	2016-12-28	0.008
2	2016-10-21	2	6	2016-12-05	Var NIL	45	2016-12-05	0.1789
2	2016-10-21	1	3	2016-12-05	Var NIL	45	2016-12-05	0.258
2	2016-10-21	8	4	2016-12-19	Var NIL	59	2016-12-19	0.128
2	2016-10-21	11	2	2016-12-14	Var NIL	54	2016-12-14	0.001
2	2016-10-21	7	5	2016-12-12	Var NIL	52	2016-12-12	0.243
2	2016-10-21	2	3	2016-12-26	Var NIL	66	2016-12-26	0.1003
2	2016-10-21	5	5	2016-12-12	Var NIL	52	2016-12-12	0.0016
2	2016-10-21	8	2	2016-12-14	Var NIL	54	2016-12-14	0.15
2	2016-10-21	7	5	2017-01-09	Var NIL	80	2017-01-09	0.0507
2	2016-10-21	11	1	2016-12-19	Var NIL	59	2016-12-19	0.19
2	2016-10-21	9	5	2016-12-19	Var NIL	59	2016-12-19	0.152
2	2016-11-17	10	2	x	Var NIL		x
2	2016-11-17	5	4	2016-12-12	Var NIL	25	2016-12-12	0.2
2	2016-11-17	11	1	2016-12-09	Var NIL	22	2016-12-09	0.2017
2	2016-11-17	6	4	2016-12-16	Var NIL	29	2016-12-16	0.1142
2	2016-11-17	10	3	2016-12-09	Var NIL	22	2016-12-09	0.149
2	2016-11-17	4	5	2016-12-09	Var NIL	22	2016-12-09	0.105
2	2016-11-17	3	1	2016-12-09	Var NIL	22	2016-12-09	0.1808
2	2016-11-17	3	5	2016-12-07	Var NIL	20	2016-12-07	0.2847
8	2016-11-17	7	3	2016-12-09	Var NIL	22	2016-12-09	0.134
8	2016-11-17	5	5	2016-12-09	Var NIL	22	2016-12-09	0.115
8	2016-11-17	8	1	2016-12-09	Var NIL	22	2016-12-09	0.138
8	2016-11-17	2	6	2016-12-07	Var NIL	20	2016-12-07	0.232
8	2016-10-21	8	1	2016-12-16	vin3-4 FRI	56	2016-12-16	0.1302
8	2016-10-21	3	6	2016-12-16	vin3-4 FRI	56	2016-12-16	0.123
8	2016-10-21	6	3	2016-12-14	vin3-4 FRI	54	2016-12-14	0.129
8	2016-10-21	10	4	2016-12-14	vin3-4 FRI	54	2016-12-14	0.15
8	2016-10-21	9	1	2016-12-14	vin3-4 FRI	54	2016-12-14	0.3961
8	2016-10-21	5	6	2016-12-14	vin3-4 FRI	54	2016-12-14	0.1827
8	2016-10-21	10	2	2016-12-14	vin3-4 FRI	54	2016-12-14	0.0222
8	2016-10-21	3	6	2016-12-12	vin3-4 FRI	52	2016-12-12	0.123
8	2016-10-21	7	2	2016-12-26	vin3-4 FRI	66	2016-12-26
8	2016-10-21	10	4	2016-12-28	vin3-4 FRI	68	2016-12-28
8	2016-10-21	2	3	2017-01-05	vin3-4 FRI	76	2017-01-05
8	2016-10-21	7	5	2016-11-23	vin3-4 FRI	33	2016-11-23	0.092
8	2016-11-17	9	1	2016-12-19	vin3-4 FRI	32	2016-12-19	0.0102
8	2016-11-17	8	5	2016-12-09	vin3-4 FRI	22	2016-12-09	0.143
8	2016-11-17	4	2	2016-12-15	vin3-4 FRI	28	2016-12-15	0.2799
8	2016-11-17	11	4	2016-12-16	vin3-4 FRI	29	2016-12-16	0.149
14	2016-11-17	2	3	2016-12-21	vin3-4 FRI	34	2016-12-21	0.136
14	2016-11-17	3	6	2016-12-16	vin3-4 FRI	29	2016-12-16	0.1434
14	2016-11-17	1	1	2016-12-16	vin3-4 FRI	29	2016-12-16	0.1033
14	2016-11-17	5	6	2016-12-19	vin3-4 FRI	32	2016-12-19	0.1022
14	2016-11-17	5	3	2016-12-16	vin3-4 FRI	29	2016-12-16	0.075
14	2016-11-17	11	4	2016-12-16	vin3-4 FRI	29	2016-12-16	0.075
14	2016-11-17	1	1	2016-12-19	vin3-4 FRI	32	2016-12-19	0.107
14	2016-11-17	8	5	2016-12-15	vin3-4 FRI	28	2016-12-15	0.258
14
14
14
14
14
14
14
14
14
14
14
14
20
20
20
20
20
20
20
20
20
20
20
20
20
20
20
20
20
20
20
20
26
26
26
26
26
26
26
26
26
26
26
26
26
26
26
26
26
26
26
26
32
32
32
32
32
32
32
32
32
32
32
32
32
32
32
32
32
32
32
32

## Sheet: South Sweden 2016 transfers
Transfer	Tray	Position	Genotype	Days to buds visible after transfer	Days to first open flower after transfer
1	1	2	BRO
1	1	38	BRO				Data left blank: did not flower/died
1	1	43	BRO
1	1	66	BRO
1	2	11	BRO
1	2	19	BRO
1	2	59	BRO
1	2	65	BRO
1	3	51	BRO
1	3	57	BRO
1	3	61	BRO
1	3	64	BRO
1	3	39	COL	10	4
1	1	36	COL	12	6
1	2	43	COL	12	5
1	2	49	COL	12	3
1	3	17	COL	12	6
1	3	24	COL	14	5
1	2	27	COL	18	3
1	1	47	COL	19	8
1	3	62	COL	23	14
1	1	40	COL	24	5
1	2	15	COL	24
1	1	34	COL	27		17.25	5.9
1	2	35	EDI	55
1	1	4	EDI
1	1	12	EDI
1	1	37	EDI
1	1	65	EDI
1	2	28	EDI
1	2	37	EDI
1	2	48	EDI
1	3	4	EDI
1	3	6	EDI
1	3	45	EDI
1	3	47	EDI
1	1	32	EDIN	26
1	1	13	EDIN	27
1	2	47	EDIN	28	23
1	2	52	EDIN	28	8
1	1	45	EDIN	29
1	1	6	EDIN
1	2	8	EDIN
1	2	38	EDIN
1	3	2	EDIN
1	3	9	EDIN
1	3	30	EDIN
1	3	55	EDIN			27.6
1	2	36	LOV	58
1	1	10	LOV
1	1	19	LOV
1	1	27	LOV
1	1	57	LOV
1	2	1	LOV
1	2	14	LOV
1	2	44	LOV
1	3	10	LOV
1	3	40	LOV
1	3	63	LOV
1	3	65	LOV
1	2	7	NIL1	37
1	1	11	NIL1
1	1	51	NIL1
1	1	60	NIL1
1	1	62	NIL1
1	2	20	NIL1
1	2	21	NIL1
1	2	50	NIL1
1	3	18	NIL1
1	3	23	NIL1
1	3	38	NIL1
1	3	60	NIL1
1	1	24	NIL2	28	9
1	3	22	NIL2	37
1	2	22	NIL2	42
1	2	18	NIL2	49	4
1	1	7	NIL2
1	1	39	NIL2
1	1	42	NIL2
1	2	10	NIL2
1	2	53	NIL2
1	3	20	NIL2
1	3	27	NIL2
1	3	37	NIL2			39	6.5
1	1	8	SF2	23	5
1	1	5	SF2	25	4
1	2	5	SF2	32	4
1	2	66	SF2	37	5
1	1	20	SF2
1	1	48	SF2
1	2	3	SF2
1	2	30	SF2
1	3	3	SF2
1	3	26	SF2
1	3	32	SF2
1	3	56	SF2			29.25	4.5
1	1	22	ULL
1	1	55	ULL
1	1	56	ULL
1	1	59	ULL
1	2	12	ULL
1	2	31	ULL
1	2	39	ULL
1	2	62	ULL
1	3	21	ULL
1	3	25	ULL
1	3	46	ULL
1	3	53	ULL
1	2	17	ULLN	30	21
1	3	5	ULLN	39
1	3	34	ULLN	44
1	1	35	ULLN
1	1	46	ULLN
1	1	50	ULLN
1	1	52	ULLN
1	2	26	ULLN
1	2	61	ULLN
1	2	64	ULLN
1	3	41	ULLN
1	3	66	ULLN			37.6667
1	1	9	VAR
1	1	18	VAR
1	1	23	VAR
1	1	33	VAR
1	2	34	VAR
1	2	40	VAR
1	2	45	VAR
1	2	55	VAR
1	3	1	VAR
1	3	13	VAR
1	3	35	VAR
1	3	59	VAR
1	2	42	VARN	58
1	1	21	VARN
1	1	53	VARN
1	1	58	VARN
1	1	61	VARN
1	2	24	VARN
1	2	32	VARN
1	2	56	VARN
1	3	14	VARN
1	3	29	VARN
1	3	33	VARN
1	3	52	VARN
1	3	36	VIN3-1	44
1	1	14	VIN3-1
1	1	26	VIN3-1
1	1	29	VIN3-1
1	1	63	VIN3-1
1	2	6	VIN3-1
1	2	9	VIN3-1
1	2	16	VIN3-1
1	2	41	VIN3-1
1	3	12	VIN3-1
1	3	49	VIN3-1
1	3	54	VIN3-1
2	5	48	BRO	37
2	4	2	BRO
2	4	8	BRO
2	4	28	BRO
2	4	52	BRO
2	5	8	BRO
2	5	14	BRO
2	5	62	BRO
2	6	11	BRO
2	6	23	BRO
2	6	47	BRO
2	6	66	BRO
2	4	14	COL	4	6
2	5	30	COL	5
2	5	25	COL	8	3
2	4	17	COL	13	3
2	5	55	COL	14	6
2	6	49	COL	14	4
2	6	35	COL	16	7
2	5	22	COL	18
2	6	26	COL	18
2	6	62	COL	18	10
2	4	24	COL	1	8
2	4	25	COL
2	5	36	EDI	20
2	4	15	EDI	21
2	5	20	EDI	21
2	5	38	EDI	21
2	6	54	EDI	21
2	6	65	EDI	23
2	4	9	EDI	26
2	4	35	EDI	30
2	6	20	EDI	32
2	6	17	EDI	33
2	4	34	EDI
2	5	64	EDI
2	4	18	EDIN	16
2	4	21	EDIN	16
2	5	51	EDIN	16	7
2	4	20	EDIN	18
2	4	31	EDIN	18	8
2	6	14	EDIN	20
2	6	19	EDIN	21	5
2	6	43	EDIN	21	9
2	5	44	EDIN	22	14
2	6	4	EDIN	34
2	5	23	EDIN	38
2	5	11	EDIN
2	5	49	LOV	37
2	4	11	LOV
2	4	16	LOV
2	4	54	LOV
2	4	66	LOV
2	5	3	LOV
2	5	17	LOV
2	5	46	LOV
2	6	2	LOV
2	6	7	LOV
2	6	36	LOV
2	6	57	LOV
2	4	27	NIL1	32
2	4	37	NIL1	32
2	6	50	NIL1	32
2	5	35	NIL1	34
2	6	24	NIL1	34
2	5	47	NIL1	37
2	5	59	NIL1	37
2	6	38	NIL1	43
2	4	12	NIL1
2	4	29	NIL1
2	5	1	NIL1
2	6	3	NIL1
2	6	52	NIL2	19
2	4	26	NIL2	20
2	4	19	NIL2	21
2	4	51	NIL2	21	9
2	5	27	NIL2	21
2	5	39	NIL2	21
2	5	61	NIL2	22
2	6	46	NIL2	26
2	5	65	NIL2	28
2	6	45	NIL2	30
2	6	34	NIL2	34
2	4	45	NIL2
2	4	49	SF2	20	10
2	5	29	SF2	20
2	6	51	SF2	20	6
2	4	38	SF2	21
2	4	44	SF2	21	11
2	5	60	SF2	21
2	6	29	SF2	21
2	6	58	SF2	23	9
2	4	56	SF2
2	5	10	SF2
2	5	12	SF2
2	6	6	SF2
2	4	46	ULL	21	13
2	6	53	ULL	31	3
2	5	4	ULL	32
2	5	43	ULL	36
2	5	37	ULL	37
2	6	59	ULL	37
2	4	33	ULL
2	4	57	ULL
2	4	60	ULL
2	5	41	ULL
2	6	40	ULL
2	6	64	ULL
2	4	30	ULLN	18	8
2	4	47	ULLN	21	13
2	5	5	ULLN	21	7
2	5	32	ULLN	21	9
2	6	15	ULLN	21
2	6	48	ULLN	21
2	5	40	ULLN	23
2	4	10	ULLN	26	6
2	4	23	ULLN	29
2	6	22	ULLN	30
2	6	30	ULLN	30
2	5	34	ULLN	34
2	5	50	VAR	43
2	5	53	VAR	43
2	4	22	VAR
2	4	40	VAR
2	4	53	VAR
2	4	65	VAR
2	5	28	VAR
2	5	58	VAR
2	6	25	VAR
2	6	32	VAR
2	6	44	VAR
2	6	55	VAR
2	4	39	VARN	21
2	4	43	VARN	21	11
2	4	48	VARN	21	9
2	6	41	VARN	22
2	5	54	VARN	23	13
2	6	31	VARN	24
2	5	21	VARN	26	8
2	6	63	VARN	29	7
2	5	2	VARN	31
2	4	3	VARN	32
2	5	63	VARN
2	6	8	VARN
2	5	18	VIN3-1	34
2	5	52	VIN3-1	36
2	6	60	VIN3-1	37
2	5	19	VIN3-1	40
2	6	33	VIN3-1	40
2	5	16	VIN3-1	43
2	4	6	VIN3-1
2	4	13	VIN3-1
2	4	32	VIN3-1
2	4	62	VIN3-1
2	6	1	VIN3-1
2	6	9	VIN3-1
3	7	27	BRO	16	8
3	7	53	BRO	16	9
3	8	2	BRO	17	8
3	7	5	BRO	18	7
3	9	25	BRO	18	8
3	9	2	BRO	19	7
3	9	12	BRO	19	9
3	9	47	BRO	19	9
3	7	42	BRO	20	6
3	8	66	BRO	20	6
3	8	41	BRO
3	8	61	BRO
3	7	15	COL	1	7
3	7	41	COL	1	8
3	7	65	COL	1	8
3	9	29	COL	1	8
3	7	21	COL	2	6
3	8	63	COL	2	7
3	9	42	COL	2	16
3	9	13	COL	3	5
3	8	13	COL	4	7
3	8	50	COL	4	7
3	8	44	COL	9	6
3	9	1	COL	12	5
3	7	16	EDI	9	8
3	8	60	EDI	9	7
3	7	35	EDI	11	10
3	8	46	EDI	11	10
3	9	32	EDI	11	8
3	7	49	EDI	12	11
3	9	18	EDI	12	9
3	7	45	EDI	13	8
3	8	31	EDI	13	8
3	9	17	EDI	13	10
3	9	28	EDI	13	8
3	8	26	EDI	14	9
3	7	3	EDIN	10	6
3	7	50	EDIN	11	5
3	8	56	EDIN	11	6
3	9	14	EDIN	11	8
3	7	30	EDIN	12	6
3	8	57	EDIN	12	8
3	9	20	EDIN	12	7
3	9	61	EDIN	12	6
3	8	53	EDIN	13	7
3	9	27	EDIN	13	10
3	7	66	EDIN	14	7
3	8	18	EDIN
3	8	29	LOV	13	11
3	8	37	LOV	13	12
3	9	50	LOV	14	9
3	7	44	LOV	15	11
3	7	48	LOV	15	10
3	9	63	LOV	15	9
3	7	10	LOV	16	10
3	8	39	LOV	16	8
3	8	15	LOV	18	6
3	9	15	LOV	22
3	7	57	LOV
3	9	39	LOV
3	7	9	NIL1	13	8
3	8	3	NIL1	13	8
3	8	5	NIL1	13	5
3	7	23	NIL1	14	8
3	8	9	NIL1	14	8
3	9	65	NIL1	14	7
3	8	6	NIL1	15	8
3	7	40	NIL1	16	8
3	9	49	NIL1	16	8
3	9	41	NIL1	18	8
3	7	46	NIL1	19	7
3	9	31	NIL1	21
3	9	43	NIL2	9	8
3	9	64	NIL2	11	6
3	8	65	NIL2	12	7
3	7	31	NIL2	13	5
3	8	47	NIL2	13	6
3	9	10	NIL2	13	7
3	9	22	NIL2	13	10
3	8	12	NIL2	14	7
3	7	25	NIL2	15	8
3	7	54	NIL2	15	8
3	7	38	NIL2	16	7
3	8	36	NIL2
3	8	42	SF2	11	6
3	8	52	SF2	11	8
3	9	52	SF2	11	7
3	7	1	SF2	12	9
3	7	51	SF2	13	7
3	8	24	SF2	13	8
3	9	11	SF2	13	7
3	9	53	SF2	13	7
3	7	36	SF2	14	9
3	9	30	SF2	16	7
3	8	27	SF2	17	7
3	7	62	SF2	19	8
3	9	62	ULL	16	9
3	8	21	ULL	17	7
3	8	7	ULL	18	7
3	8	59	ULL	18	7
3	9	57	ULL	18	8
3	7	58	ULL	19	4
3	9	58	ULL	19	7
3	7	13	ULL	20	8
3	7	28	ULL	20	8
3	7	52	ULL
3	8	45	ULL
3	9	51	ULL
3	7	2	ULLN	10	8
3	7	6	ULLN	12	8
3	7	32	ULLN	12	9
3	9	35	ULLN	12	8
3	7	26	ULLN	13	10
3	8	11	ULLN	13	14
3	8	34	ULLN	13	8
3	9	5	ULLN	13	15
3	8	51	ULLN	15	9
3	9	6	ULLN	15	9
3	9	4	ULLN	16	7
3	8	14	ULLN
3	9	33	VAR	15	8
3	8	1	VAR	17	9
3	9	55	VAR	17	8
3	7	12	VAR	18	8
3	8	32	VAR	18	9
3	9	36	VAR	18	8
3	7	7	VAR	19
3	7	60	VAR	19
3	9	26	VAR	19	9
3	7	61	VAR	20	7
3	8	33	VAR	20	6
3	8	58	VAR	26
3	7	4	VARN	12	6
3	7	14	VARN	12	6
3	7	24	VARN	12	6
3	7	29	VARN	12	7
3	8	62	VARN	13	8
3	9	21	VARN	13	8
3	9	24	VARN	13	10
3	9	48	VARN	13	8
3	9	66	VARN	14	7
3	8	19	VARN	15	8
3	8	55	VARN	15	8
3	8	43	VARN	18	8
3	8	17	VIN3-1	15	10
3	7	18	VIN3-1	18	7
3	8	20	VIN3-1	21	8
3	8	23	VIN3-1	22
3	7	63	VIN3-1	25
3	7	33	VIN3-1	26
3	9	19	VIN3-1	26
3	7	11	VIN3-1
3	8	49	VIN3-1
3	9	46	VIN3-1
3	9	56	VIN3-1
3	9	59	VIN3-1
4	10	33	BRO
4	12	39	BRO	11	8
4	10	24	BRO	12	8
4	11	2	BRO	12	8
4	11	13	BRO	12	9
4	11	57	BRO	12	9
4	12	6	BRO	12	8
4	10	63	BRO	13	6
4	12	16	BRO	14	7
4	10	7	BRO	16	6
4	11	43	BRO	18	5
4	12	29	BRO	18
4	11	4	COL
4	12	43	COL
4	10	35	COL	0	5
4	10	37	COL	0	3
4	10	29	COL	1	9
4	10	1	COL	3	4
4	11	39	COL	3	3
4	11	63	COL	3	5
4	11	59	COL	5	8
4	12	1	COL	6	10
4	12	37	COL	8	7
4	12	51	COL	9	8
4	12	61	EDI
4	10	56	EDI	9	11
4	10	60	EDI	9	10
4	11	55	EDI	9	10
4	12	3	EDI	9	9
4	12	58	EDI	9	10
4	10	16	EDI	11	8
4	11	33	EDI	11	8
4	11	64	EDI	11	8
4	11	26	EDI	12	8
4	12	17	EDI	12	7
4	10	44	EDI	15
4	10	4	EDIN	8	11
4	10	10	EDIN	8	8
4	12	33	EDIN	8	18
4	11	3	EDIN	11	7
4	11	14	EDIN	11	9
4	11	44	EDIN	11	8
4	12	62	EDIN	11	7
4	10	8	EDIN	13	10
4	11	19	EDIN	13	7
4	12	56	EDIN	14	6
4	12	57	EDIN	14
4	10	48	EDIN	15	7
4	10	5	LOV
4	11	46	LOV
4	11	35	LOV	8	11
4	11	65	LOV	8	11
4	10	26	LOV	9	11
4	11	12	LOV	9	10
4	12	21	LOV	9	11
4	10	32	LOV	10	10
4	10	62	LOV	10	13
4	12	53	LOV	10	9
4	12	54	LOV	10	9
4	12	59	LOV	13	8
4	10	9	NIL1		0
4	12	20	NIL1		0
4	10	15	NIL1	8	9
4	11	28	NIL1	10	8
4	11	27	NIL1	11	8
4	11	23	NIL1	12	10
4	12	52	NIL1	12	8
4	12	63	NIL1	12	7
4	10	13	NIL1	13	9
4	11	15	NIL1	13	9
4	10	11	NIL1	14	7
4	12	18	NIL1	14	5
4	10	18	NIL2	8	9
4	10	34	NIL2	8	7
4	11	29	NIL2	8	8
4	11	56	NIL2	8	9
4	11	61	NIL2	8	8
4	12	28	NIL2	8	14
4	10	55	NIL2	9	8
4	12	4	NIL2	9	8
4	11	22	NIL2	10	7
4	12	15	NIL2	10	9
4	10	53	NIL2	13	7
4	12	64	NIL2	14	6
4	12	40	SF2
4	11	30	SF2	8	8
4	11	66	SF2	8	7
4	12	14	SF2	8	9
4	12	32	SF2	8	8
4	10	27	SF2	9	8
4	10	66	SF2	9	14
4	12	55	SF2	10	8
4	11	32	SF2	12	8
4	10	51	SF2	13	6
4	10	65	SF2	13	6
4	11	53	SF2	16	7
4	10	12	ULL	11	7
4	12	12	ULL	11	8
4	10	25	ULL	12	6
4	11	7	ULL	12	7
4	11	58	ULL	12	8
4	11	16	ULL	13	7
4	11	52	ULL	13	7
4	12	38	ULL	13	9
4	10	54	ULL	14	6
4	10	59	ULL	15	5
4	12	26	ULL	18	5
4	12	2	ULL	19
4	11	20	ULLN
4	12	27	ULLN
4	12	47	ULLN
4	10	23	ULLN	8	8
4	10	46	ULLN	8	8
4	10	3	ULLN	9	8
4	10	14	ULLN	9	10
4	11	47	ULLN	9	9
4	11	8	ULLN	10	7
4	11	42	ULLN	10	6
4	12	48	ULLN	12	8
4	12	25	ULLN	21
4	10	20	VAR
4	10	58	VAR	10	10
4	10	30	VAR	11	9
4	10	38	VAR	12	8
4	12	7	VAR	12	8
4	12	10	VAR	12	8
4	12	36	VAR	12	8
4	11	21	VAR	13	8
4	11	51	VAR	13	7
4	12	66	VAR	13	8
4	11	5	VAR	14	6
4	11	24	VAR	14	8
4	11	48	VARN
4	10	17	VARN	8	9
4	11	41	VARN	8	9
4	11	38	VARN	9	9
4	12	31	VARN	9	8
4	12	49	VARN	9	8
4	10	57	VARN	10	9
4	11	10	VARN	10	8
4	10	22	VARN	12	7
4	10	31	VARN	12	10
4	12	50	VARN	12	7
4	12	13	VARN	14	8
4	10	39	VIN3-1
4	10	45	VIN3-1
4	11	25	VIN3-1
4	11	37	VIN3-1
4	11	54	VIN3-1
4	12	19	VIN3-1
4	12	23	VIN3-1
4	12	41	VIN3-1
4	12	44	VIN3-1
4	11	62	VIN3-1	15
4	10	6	VIN3-1	20
4	10	21	VIN3-1	21

## Sheet: North Sweden transfers 2016
Transfer 1					1	2	3	4	5	6	7	8	9	10	11	12
genotype	No. plants at transfer	Dead before bolting	Dead before flowering	Did Not Flower	Flowering dates
BRO	10	6	0	3	104
COL	10	2	0	0	41	34	24	36	7	7	7	7
EDI	12	8	2	1	78	64	66	71	34
EDIN	11	0	0	0	20	20	57	24	13	22	27	17	27	27	38
LOV	12	6	0	6
NIL1	10	3	1	2	41	41	36	48	62	104
NIL2	11	3	1	0	38	31	83	62	15	24	31	29	62
SF2	11	4	0	0	62	36	17	24	10	31	7
ULL	11	6	0	4	48
ULLN	12	3	0	0	62	38	17	45	24	22	83	64	43
VAR	11	8	0	3
VARN	10	4	0	0	41	69	43	57	38	41
VIN3-1	12	4	0	0	29	24	62	13	22	20	20	41
Transfer 2
genotype	No. plants at transfer	Dead before bolting	Dead before flowering	DNF	Flowering dates
BRO	12	3	0	1	50	55	43	38	34	50	27	38
COL	10	0	0	0	1	1	1	1	1	1	1	1	1	1
EDI	11	0	0	0	8	20	6	3	15	8	8	20	10	3	13
EDIN	11	0	0	0	6	34	29	3	1	1	1	1	1	1	1
LOV	11	2	0	9
NIL1	11	0	0	1	13	3	10	6	1	1	1	1	1	1
NIL2	11	2	1	0	17	6	34	3	22	1	1	1	1
SF2	11	0	0	0	3	6	6	1	1	1	1	1	1	1	1
ULL	10	3	0	0	50	43	34	41	38	43	1
ULLN	12	0	0	0	6	6	6	10	20	6	1	1	1	1	1	1
VAR	12	9	3	0	45	62	50
VARN	11	2	0	0	20	41	27	22	27	6	13	17	20
VIN3-1	11	1	0	0	6	6	3	6	3	3	1	1	1	1
Transfer 3
genotype	No. plants at transfer	Dead before bolting	Dead before flowering	DNF	Flowering dates
BRO	9	0	2	0	22	24	27	29	22	41	17	20	31
COL	12	0	0	0	1	1	1	1	1	1	1	1	1	1	1	1
EDI	10	1	1	0	6	8	3	6	3	3	1	1	1
EDIN	11	0	0	0	6	10	3	6	10	1	1	1	1	1	1
LOV	11	0	0	0	27	38	24	27	20	24	20	22	20	20	17
NIL1	11	0	0	0	3	10	10	13	22	10	1	1	1	1
NIL2	11	0	0	0	8	13	17	3	6	29	1	1	1	1	1
SF2	12	1	1	0	1	1	1	1	1	1	1	1	1	1	8
ULL	10	0	0	1	17	29	22	29	22	29	22	22	22
ULLN	11	0	0	0	6	6	1	1	1	1	1	1	1	1	1
VAR	11	1	1	0	17	17	17	22	41	31	22	34	24	22
VARN	11	0	0	0	13	3	6	3	8	1	1	1	1	1	1
VIN3-1	12	0	0	0	6	10	1	1	1	1	1	1	1	1	1	1
Transfer 4
genotype	No. plants at transfer	Dead before bolting	Dead before flowering	DNF	Flowering dates
BRO	12	0	0	0	18	18	15	15	15	8	15	15	13	15	15	15
COL	11	0	0	0	1	1	1	1	1	1	1	1	1	1	1
EDI	11	0	0	0	11	6	8	6	1	4	4	6	1	6	4
EDIN	12	0	0	0	1	1	1	1	1	1	1	1	1	1	1	1
LOV	11	0	0	0	13	13	13	13	11	13	11	11	11	13	11
NIL1	10	0	0	0	1	8	1	11	1	1	1	4	1	15
NIL2	11	0	0	0	1	1	1	1	1	1	1	1	1	1	13
SF2	12	0	0	0	11	1	1	1	1	1	1	1	1	1	1	1
ULL	11	1	1	0	18	13	11	11	15	13	15	13	11	15	1
ULLN	11	0	0	0	4	1	4	1	1	1	1	1	1	1	1
VAR	12	0	1	0	13	11	15	13	15	15	11	11	15	11	11	20
VARN	12	0	0	0	8	8	1	1	11	1	8	1	1	8	11	1
VIN3-1	10	0	0	0	4	1	1	1	1	1	1	1	1	1
