# Supplementary material for: Natural variation in autumn expression is the major adaptive determinant distinguishing Arabidopsis FLC haplotypes
Source: eLife. 2020 Sep 9;9:e57671. doi: 10.7554/eLife.57671 (PMC7518893; doi:10.7554/eLife.57671)
Supplement: Source data 6. — Survival and phenotypes for field experiments 2016–17. [file elife-57671-data6.xlsx]

## Sheet: Key
Code	Genotype	N. for plants surviving to set seed, North Sweden (n for statistical tests for Fig. 7D-E, S7-2D, G, H)	N. for plants surviving to bolt, North Sweden (n for statistical tests for Fig. S7-2F)
BRO	Bro1-6	12	20
COL	Col-0	3	24
EDI	Edi-0	1	4
EDIN	Edi NIL	4	25
LOV	Löv-1	10	29
NIL1	Lov NIL1	4	20
NIL2	Lov NIL2	4	26
SF2	Col FRI	2	29
ULL	Ull2-5	5	23
ULLN	Ull NIL	12	28
VAR	Var2-6	9	21
VARN	Var NIL	7	21
VIN3-1	vin3-1 FRI	5	26
Norwich only
BRON	Bro NIL
FCAF	fca-9 FRI
FLDF	fld-4 FRI
FVEF	fve-3 FRI
LHP	lhp1-3 FRI
NDX	ndx1-1 FRI
SDG8	sdg8 FRI
VAL	val1-2 FRI
VIN3	vin3-4 FRI
VRN1	vrn1-4 FRI
VRN2	vrn2-1 FRI
VRN5	vrn5-8 FRI
flc2	flc-2 FRI

## Sheet: North Sweden 2016-17
Tray pos	Genotype	individual plant	length	N of stems	no of rosette branches	n of branches	n of secondary branches	n of siliques	Dead before flowering	Dead before setting seed	Dead before winter	Dead after winter	Dead after flowering over winter	flowered before winter	Bud date	Flower date
F_1_1_1	BRO	F1.1	5	1	0	0	0	0		1					2017-04-13
F_1_1_2	EMPTY	F1.2	0	0	0	0	0	0	1	1	1
F_1_1_3	EDI	F1.3	0	0	0	0	0	0	1	1		1
F_1_1_4	BRO	F1.4	16.5	3	2	8	0	2							2017-05-03
F_1_1_5	LOV	F1.5	15	1	0	4	0	2							2017-04-13
F_1_1_6	NIL1	F1.6	0	0	0	0	0	0	1	1		1
F_1_1_7	NIL2	F1.7	0	0	0	0	0	0	1	1		1
F_1_1_8	COL	F1.8	0	0	0	0	0	0	1	1		1	1	1	2016-10-04	2016-10-04
F_1_1_9	ULLN	F1.9	5	9	8	0	0	0		1				1	2016-10-11	2017-05-03
F_1_1_10	VAR	F1.10	0	0	0	0	0	0	1	1	1
F_1_1_11	NIL2	F1.11	20.5	12	11	5	0	120							2017-05-03
F_1_2_1	EDIN	F1.12	0	0	0	0	0	0	1	1				1	2016-10-11
F_1_2_2	NIL2	F1.13	0	0	0	0	0	0	1	1					2017-04-13
F_1_2_3	ULL	F1.14	9.5	1	0	0	0	0		1					2017-05-03
F_1_2_4	COL	F1.15	0	0	0	0	0	0	1	1		1	1	1	2016-10-04	2016-10-11
F_1_2_5	BRO	F1.16	5	1	0	0	0	0		1					2017-04-13
F_1_2_6	LOV	F1.17	2	2	1	0	0	0		1					2017-04-13
F_1_2_7	BRO	F1.18	7.5	4	3	0	0	0		1					2017-04-13
F_1_2_8	EDI	F1.19	0	0	0	0	0	0	1	1		1	1	1	2016-10-11
F_1_2_9	EDIN	F1.20	0	0	0	0	0	0	1	1				1	2016-10-11
F_1_2_10	COL	F1.21	0	0	0	0	0	0	1	1		1	1	1	2016-10-04	2016-10-11
F_1_2_11	VARN	F1.22	26.5	2	1	10	0	159							2017-04-05
F_1_3_1	VAR	F1.23	0	0	0	0	0	0		1					2017-04-13
F_1_3_2	EDIN	F1.24	14.5	9	8	0	0	37						1	2016-10-11
F_1_3_3	NIL1	F1.25	0	0	0	0	0	0	1	1		1		1	2016-10-11
F_1_3_4	ULLN	F1.26	4.5	15	14	0	0	0		1					2017-04-13
F_1_3_5	SF2	F1.27	0	0	0	0	0	0	1	1
F_1_3_6	EMPTY	F1.28	0	0	0	0	0	0	1	1	1
F_1_3_7	VAR	F1.29	9	1	0	0	0	14							2017-04-13
F_1_3_8	NIL1	F1.30	16.5	12	11	1	0	90							2017-04-05
F_1_3_9	ULLN	F1.31	0	0	0	0	0	0	1	1		1	1	1	2016-10-11
F_1_3_10	EDI	F1.32	0	0	0	0	0	0	1	1		1
F_1_3_11	SF2	F1.33	3	2	1	0	0	0		1				1	2016-10-11
F_1_4_1	NIL1	F1.34	0	0	0	0	0	0		1		1	1	1	2016-10-18
F_1_4_2	VAR	F1.35	0	0	0	0	0	0		1					2017-04-13
F_1_4_3	EMPTY	F1.36	0	0	0	0	0	0	1	1	1
F_1_4_4	BRO	F1.37	6.5	3	2	2	0	1							2017-04-09
F_1_4_5	COL	F1.38	0	0	0	0	0	0	1	1		1	1	1	2016-10-04	2016-10-04
F_1_4_6	NIL1	F1.39	14	13	12	9	0	0		1				1	2016-10-11	2017-04-09
F_1_4_7	VARN	F1.40	20	13	12	1	0	199						1	2016-10-11
F_1_4_8	LOV	F1.41	11.5	2	1	1	0	6							2017-04-13
F_1_4_9	ULLN	F1.42	0	0	0	0	0	0	1	1		1	1	1	2016-10-11
F_1_4_10	ULLN	F1.43	0	0	0	0	0	0	1	1		1	1	1	2016-10-11
F_1_4_11	EMPTY	F1.44	0	0	0	0	0	0	1	1	1
F_1_5_1	EMPTY	F1.45	0	0	0	0	0	0	1	1	1
F_1_5_2	EDIN	F1.46	0	0	0	0	0	0	1	1		1	1	1	2016-10-11
F_1_5_3	VAR	F1.47	0	0	0	0	0	0	1	1		1
F_1_5_4	COL	F1.48	0	0	0	0	0	0	1	1		1	1	1	2016-10-04	2016-10-04
F_1_5_5	NIL2	F1.49	0	0	0	0	0	0	1	1		1
F_1_5_6	ULLN	F1.50	19	7	6	4	0	67						1	2016-10-11	2017-04-05
F_1_5_7	EDIN	F1.51	0	0	0	0	0	0	1	1		1
F_1_5_8	EMPTY	F1.52	0	0	0	0	0	0	1	1	1
F_1_5_9	NIL2	F1.53	0	0	0	0	0	0	1	1		1	1	1	2016-10-11
F_1_5_10	ULL	F1.54	0	0	0	0	0	0	1	1
F_1_5_11	NIL2	F1.55	0	0	0	0	0	0	1	1
F_1_6_1	BRO	F1.56	0	0	0	0	0	0	1	1		1
F_1_6_2	EDI	F1.57	0	0	0	0	0	0	1	1	1
F_1_6_3	ULL	F1.58	0	0	0	0	0	0	1	1		1
F_1_6_4	EDI	F1.59	0	0	0	0	0	0	1	1		1
F_1_6_5	ULL	F1.60	0	0	0	0	0	0	1	1		1
F_1_6_6	SF2	F1.61	0	0	0	0	0	0	1	1		1
F_1_6_7	COL	F1.62	0	0	0	0	0	0	1	1		1
F_1_6_8	NIL2	F1.63	0	0	0	0	0	0	1	1		1
F_1_6_9	VAR	F1.64	0	0	0	0	0	0	1	1		1
F_1_6_10	SF2	F1.65	10	6	5	2	0	0		1				1	2016-10-04
F_1_6_11	COL	F1.66	16.5	6	5	5	0	47						1	2016-10-11	2017-05-03
F_2_1_1	LOV	F2.1	0	0	0	0	0	0		1					2017-04-13
F_2_1_2	ULL	F2.2	8	1	0	0	0	0		1					2017-04-13
F_2_1_3	VAR	F2.3	1	1	0	0	0	0		1					2017-04-09
F_2_1_4	SF2	F2.4	11.5	13	12	4	0	0		1				1	2016-10-11
F_2_1_5	VARN	F2.5	13	15	14	3	0	0		1					2017-04-09
F_2_1_6	NIL1	F2.6	7	9	8	0	0	0		1					2017-04-13
F_2_1_7	VIN3-1	F2.7	0	0	0	0	0	0		1					2017-04-09
F_2_1_8	COL	F2.8	0	0	0	0	0	0		1				1	2016-10-04	2016-10-11
F_2_1_9	NIL2	F2.9	0	0	0	0	0	0		1
F_2_1_10	VARN	F2.10	0	0	0	0	0	0		1		1	1	1	2016-10-11
F_2_1_11	ULLN	F2.11	0	0	0	0	0	0		1		1	1	1	2016-10-11
F_2_2_1	NIL2	F2.12	0	0	0	0	0	0		1		1	1	1	2016-10-11
F_2_2_2	VAR	F2.13	16.5	1	0	2	2	17							2017-04-09
F_2_2_3	NIL2	F2.14	11.5	18	17	0	0	0		1					2017-04-05
F_2_2_4	EMPTY	F2.15	26	1	0	9	4	94							2017-04-09
F_2_2_5	VARN	F2.16	0	0	0	0	0	0	1	1	1
F_2_2_6	BRO	F2.17	0	0	0	0	0	0		1					2017-04-05
F_2_2_7	ULLN	F2.18	0	0	0	0	0	0		1					2017-04-05
F_2_2_8	VARN	F2.19	0	0	0	0	0	0	1	1	1
F_2_2_9	BRO	F2.20	0	0	0	0	0	0	1	1
F_2_2_10	VIN3-1	F2.21	0	0	0	0	0	0		1				1	2016-10-11
F_2_2_11	NIL1	F2.22	0	0	0	0	0	0		1					2017-04-05
F_2_3_1	BRO	F2.23	0	0	0	0	0	0	1	1		1
F_2_3_2	VARN	F2.24	0	0	0	0	0	0	1	1
F_2_3_3	ULLN	F2.25	14	9	8	10	0	22						1	2016-10-04	2017-05-03
F_2_3_4	NIL2	F2.26	0	0	0	0	0	0		1				1	2016-10-11
F_2_3_5	VAR	F2.27	0	0	0	0	0	0		1					2017-04-09
F_2_3_6	LOV	F2.28	0	0	0	0	0	0		1					2017-04-13
F_2_3_7	BRO	F2.29	0	0	0	0	0	0	1	1
F_2_3_8	NIL1	F2.30	0	0	0	0	0	0	1	1
F_2_3_9	VIN3-1	F2.31	0	0	0	0	0	0	1	1		1
F_2_3_10	NIL2	F2.32	0	0	0	0	0	0		1					2017-04-05
F_2_3_11	EDIN	F2.33	0	0	0	0	0	0	1	1
F_2_4_1	EDI	F2.34	0	0	0	0	0	0	1	1		1
F_2_4_2	LOV	F2.35	0	0	0	0	0	0		1					2017-04-13
F_2_4_3	LOV	F2.36	0	0	0	0	0	0		1					2017-04-13
F_2_4_4	VIN3-1	F2.37	0	0	0	0	0	0		1
F_2_4_5	NIL2	F2.38	0	0	0	0	0	0		1					2017-04-09
F_2_4_6	NIL2	F2.39	0	0	0	0	0	0		1				1	2016-10-11
F_2_4_7	ULLN	F2.40	0	0	0	0	0	0		1				1	2016-10-04
F_2_4_8	VARN	F2.41	0	0	0	0	0	0		1
F_2_4_9	COL	F2.42	0	0	0	0	0	0		1		1	1	1	2016-10-04	2016-10-04
F_2_4_10	NIL1	F2.43	0	0	0	0	0	0	1	1
F_2_4_11	COL	F2.44	0	0	0	0	0	0		1		1	1	1	2016-10-04	2016-10-04
F_2_5_1	VIN3-1	F2.45	0	0	0	0	0	0	1	1
F_2_5_2	VAR	F2.46	0	0	0	0	0	0		1					2017-04-13
F_2_5_3	NIL1	F2.47	0	0	0	0	0	0	1	1		1
F_2_5_4	VARN	F2.48	0	0	0	0	0	0	1	1		1
F_2_5_5	LOV	F2.49	0	0	0	0	0	0		1					2017-04-13
F_2_5_6	EDI	F2.50	0	0	0	0	0	0	1	1		1
F_2_5_7	VIN3-1	F2.51	0	0	0	0	0	0	1	1
F_2_5_8	VAR	F2.52	0	0	0	0	0	0	1	1
F_2_5_9	VIN3-1	F2.53	0	0	0	0	0	0		1		1	1	1	2016-10-11
F_2_5_10	NIL2	F2.54	0	0	0	0	0	0		1		1	1	1	2016-10-11
F_2_5_11	COL	F2.55	0	0	0	0	0	0		1		1	1	1	2016-10-04	2016-10-11
F_2_6_1	BRO	F2.56	0	0	0	0	0	0	1	1
F_2_6_2	EMPTY	F2.57	0	0	0	0	0	0	1	1	1
F_2_6_3	NIL1	F2.58	0	0	0	0	0	0	1	1
F_2_6_4	COL	F2.59	0	0	0	0	0	0		1				1	2016-10-04	2016-10-11
F_2_6_5	EMPTY	F2.60	0	0	0	0	0	0	1	1	1
F_2_6_6	LOV	F2.61	0	0	0	0	0	0	1	1
F_2_6_7	EDI	F2.62	0	0	0	0	0	0		1					2017-04-13
F_2_6_8	LOV	F2.63	0	0	0	0	0	0	1	1
F_2_6_9	VIN3-1	F2.64	0	0	0	0	0	0		1		1	1	1	2016-10-11
F_2_6_10	EDI	F2.65	0	0	0	0	0	0	1	1
F_2_6_11	SF2	F2.66	0	0	0	0	0	0	1	1
F_3_1_1	SF2	F3.1	3	2	1	0	0	0		1				1	2016-10-18
F_3_1_2	VAR	F3.2	0	0	0	0	0	0	1	1	1
F_3_1_3	EDIN	F3.3	0	0	0	0	0	0		1		1	1	1	2016-10-11
F_3_1_4	LOV	F3.4	8	1	0	0	0	0		1					2017-04-13
F_3_1_5	ULLN	F3.5	0	0	0	0	0	0		1		1	1	1	2016-10-18
F_3_1_6	SF2	F3.6	0	0	0	0	0	0		1				1	2016-10-11
F_3_1_7	VIN3-1	F3.7	0	0	0	0	0	0	1	1	1
F_3_1_8	VAR	F3.8	12.5	1	0	1	0	17							2017-04-05
F_3_1_9	ULLN	F3.9	15	7	6	3	0	30						1	2016-10-11	2017-04-05
F_3_1_10	SF2	F3.10	12	16	15	0	0	0		1				1	2016-10-11	2017-04-05
F_3_1_11	ULL	F3.11	7	1	0	0	0	0		1					2017-04-05
F_3_2_1	EMPTY	F3.12	0	0	0	0	0	0	1	1	1
F_3_2_2	EDI	F3.13	0	0	0	0	0	0	1	1
F_3_2_3	EDIN	F3.14	0	0	0	0	0	0		1				1	2016-10-11
F_3_2_4	EMPTY	F3.15	0	0	0	0	0	0	1	1	1
F_3_2_5	SF2	F3.16	0	0	0	0	0	0		1		1	1	1	2016-10-11
F_3_2_6	LOV	F3.17	26	1	0	5	1	56							2017-04-05
F_3_2_7	BRO	F3.18	0	0	0	0	0	0	1	1		1
F_3_2_8	SF2	F3.19	0	0	0	0	0	0		1				1	2016-10-11
F_3_2_9	ULLN	F3.20	17.5	9	8	0	0	127						1	2016-10-11	2017-04-05
F_3_2_10	ULLN	F3.21	11	13	12	2	0	37						1	2016-10-11	2017-04-09
F_3_2_11	VIN3-1	F3.22	8.5	8	7	0	0	46							2017-05-09
F_3_3_1	EMPTY	F3.23	0	0	0	0	0	0	1	1	1
F_3_3_2	EDIN	F3.24	0	0	0	0	0	0		1		1	1	1	2016-10-04
F_3_3_3	EDIN	F3.25	0	0	0	0	0	0		1		1	1	1	2016-10-11
F_3_3_4	BRO	F3.26	0	0	0	0	0	0	1	1		1
F_3_3_5	COL	F3.27	0	0	0	0	0	0		1		1	1	1	2016-10-04	2016-10-04
F_3_3_6	NIL2	F3.28	0	0	0	0	0	0		1		1	1	1	2016-10-11
F_3_3_7	EMPTY	F3.29	0	0	0	0	0	0	1	1	1
F_3_3_8	EDI	F3.30	0	0	0	0	0	0	1	1		1
F_3_3_9	NIL1	F3.31	0	0	0	0	0	0	1	1		1
F_3_3_10	VIN3-1	F3.32	0	0	0	0	0	0		1		1	1	1	2016-10-11
F_3_3_11	EDI	F3.33	0	0	0	0	0	0	1	1
F_3_4_1	EDIN	F3.34	0	0	0	0	0	0	1	1	1
F_3_4_2	BRO	F3.35	4	3	2	0	0	0		1					2017-05-03
F_3_4_3	EDI	F3.36	0	0	0	0	0	0	1	1		1
F_3_4_4	SF2	F3.37	0	0	0	0	0	0		1		1	1	1	2016-10-11
F_3_4_5	VARN	F3.38	0	0	0	0	0	0		1		1	1	1	2016-10-18
F_3_4_6	LOV	F3.39	0	0	0	0	0	0	1	1		1
F_3_4_7	BRO	F3.40	0	0	0	0	0	0	1	1		1
F_3_4_8	EMPTY	F3.41	0	0	0	0	0	0	1	1	1
F_3_4_9	SF2	F3.42	0	0	0	0	0	0		1		1	1	1	2016-10-11
F_3_4_10	EDIN	F3.43	0	0	0	0	0	0		1		1	1	1	2016-10-11
F_3_4_11	EMPTY	F3.44	0	0	0	0	0	0	1	1	1
F_3_5_1	NIL2	F3.45	0	0	0	0	0	0	1	1	1
F_3_5_2	EDI	F3.46	0	0	0	0	0	0	1	1		1
F_3_5_3	NIL2	F3.47	0	0	0	0	0	0		1		1	1	1	2016-10-11
F_3_5_4	NIL2	F3.48	0	0	0	0	0	0		1		1	1	1	2016-10-11
F_3_5_5	VARN	F3.49	0	0	0	0	0	0	1	1		1
F_3_5_6	NIL1	F3.50	0	0	0	0	0	0		1		1	1	1	2016-10-11
F_3_5_7	EMPTY	F3.51	0	0	0	0	0	0	1	1	1
F_3_5_8	ULL	F3.52	0	0	0	0	0	0		1		1	1	1	2016-10-11
F_3_5_9	BRO	F3.53	0	0	0	0	0	0	1	1		1
F_3_5_10	LOV	F3.54	0	0	0	0	0	0	1	1
F_3_5_11	VAR	F3.55	0	0	0	0	0	0		1					2017-04-13
F_3_6_1	EMPTY	F3.56	0	0	0	0	0	0	1	1	1
F_3_6_2	NIL1	F3.57	0	0	0	0	0	0	1	1	1
F_3_6_3	VARN	F3.58	0	0	0	0	0	0	1	1	1
F_3_6_4	EDI	F3.59	0	0	0	0	0	0	1	1	1
F_3_6_5	EMPTY	F3.60	0	0	0	0	0	0	1	1	1
F_3_6_6	ULL	F3.61	0	0	0	0	0	0	1	1	1
F_3_6_7	EDI	F3.62	0	0	0	0	0	0	1	1		1
F_3_6_8	VAR	F3.63	0	0	0	0	0	0	1	1
F_3_6_9	SF2	F3.64	0	0	0	0	0	0		1		1	1	1	2016-10-04
F_3_6_10	EMPTY	F3.65	0	0	0	0	0	0	1	1	1
F_3_6_11	ULL	F3.66	0	0	0	0	0	0		1				1	2016-10-11
F_4_1_1	EMPTY	F4.1	0	0	0	0	0	0	1	1	1
F_4_1_2	LOV	F4.2	5	1	0	0	0	0		1					2017-04-13
F_4_1_3	NIL1	F4.3	15.5	6	5	3	0	94							2017-04-09	2017-05-03
F_4_1_4	EMPTY	F4.4	0	0	0	0	0	0	1	1	1
F_4_1_5	VAR	F4.5	4	2	1	0	0	0		1					2017-04-13
F_4_1_6	COL	F4.6	19	10	9	4	0	127						1	2016-10-04	2016-10-04
F_4_1_7	NIL2	F4.7	0	0	0	0	0	0	1	1	1
F_4_1_8	VARN	F4.8	10	16	15	0	0	4						1	2016-10-11	2017-04-05
F_4_1_9	ULLN	F4.9	3	1	0	0	0	0		1				1	2016-10-11	2017-04-05
F_4_1_10	COL	F4.10	16	6	5	1	0	81						1	2016-10-11	2017-04-05
F_4_1_11	VARN	F4.11	5	9	8	0	0	0		1					2017-05-03
F_4_2_1	ULLN	F4.12	0	0	0	0	0	0	1	1	1
F_4_2_2	VARN	F4.13	0	0	0	0	0	0	1	1		1
F_4_2_3	EDIN	F4.14	0	0	0	0	0	0		1		1	1	1	2016-10-04
F_4_2_4	EMPTY	F4.15	0	0	0	0	0	0	1	1	1
F_4_2_5	BRO	F4.16	22.5	2	1	10	0	54							2017-04-13
F_4_2_6	NIL1	F4.17	0	0	0	0	0	0		1				1	2016-10-04
F_4_2_7	VARN	F4.18	0	0	0	0	0	0		1					2017-04-13
F_4_2_8	VIN3-1	F4.19	5	4	3	0	0	0		1					2017-05-03
F_4_2_9	BRO	F4.20	0	0	0	0	0	0		1					2017-04-13
F_4_2_10	ULL	F4.21	4	1	0	0	0	0		1					2017-04-13
F_4_2_11	SF2	F4.22	0	0	0	0	0	0	1	1	1
F_4_3_1	VARN	F4.23	0	0	0	0	0	0	1	1		1
F_4_3_2	ULL	F4.24	6	1	0	0	0	0		1					2017-04-13
F_4_3_3	EDIN	F4.25	0	0	0	0	0	0	1	1	1
F_4_3_4	SF2	F4.26	0	0	0	0	0	0		1				1	2016-10-04
F_4_3_5	VARN	F4.27	17	14	13	4	0	179						1	2016-10-11
F_4_3_6	NIL2	F4.28	0	0	0	0	0	0		1				1	2016-10-11
F_4_3_7	EDI	F4.29	0	0	0	0	0	0	1	1		1
F_4_3_8	NIL1	F4.30	0	0	0	0	0	0	1	1	1
F_4_3_9	EMPTY	F4.31	0	0	0	0	0	0	1	1	1
F_4_3_10	EDI	F4.32	15	1	0	5	0	56							2017-05-03
F_4_3_11	VIN3-1	F4.33	11.5	2	1	8	0	4							2017-04-13
F_4_4_1	BRO	F4.34	16	2	1	9	0	7							2017-04-13
F_4_4_2	VARN	F4.35	8	11	10	0	0	0		1					2017-04-09
F_4_4_3	EMPTY	F4.36	0	0	0	0	0	0	1	1	1
F_4_4_4	SF2	F4.37	0	0	0	0	0	0		1				1	2016-10-11
F_4_4_5	EDIN	F4.38	14	8	7	4	0	94						1	2016-10-11
F_4_4_6	NIL1	F4.39	0	0	0	0	0	0	1	1		1
F_4_4_7	EMPTY	F4.40	0	0	0	0	0	0	1	1	1
F_4_4_8	EDI	F4.41	0	0	0	0	0	0	1	1		1
F_4_4_9	NIL1	F4.42	18	3	2	4	0	6		1				1	2016-10-11
F_4_4_10	VAR	F4.43	15.5	1	0	0	0	17							2017-04-13
F_4_4_11	BRO	F4.44	21	5	4	18	0	98							2017-04-09
F_4_5_1	VARN	F4.45	0	0	0	0	0	0	1	1
F_4_5_2	SF2	F4.46	0	0	0	0	0	0	1	1
F_4_5_3	EMPTY	F4.47	0	0	0	0	0	0	1	1	1
F_4_5_4	ULLN	F4.48	0	0	0	0	0	0		1				1	2016-10-18
F_4_5_5	VAR	F4.49	9	1	0	0	0	6							2017-04-13
F_4_5_6	ULLN	F4.50	0	0	0	0	0	0	1	1
F_4_5_7	VARN	F4.51	0	0	0	0	0	0	1	1
F_4_5_8	ULL	F4.52	0	0	0	0	0	0	1	1	1
F_4_5_9	VIN3-1	F4.53	0	0	0	0	0	0	1	1		1
F_4_5_10	LOV	F4.54	0	0	0	0	0	0	1	1	1
F_4_5_11	COL	F4.55	0	0	0	0	0	0	1	1	1
F_4_6_1	SF2	F4.56	0	0	0	0	0	0	1	1		1
F_4_6_2	ULLN	F4.57	0	0	0	0	0	0		1		1	1	1	2016-10-11
F_4_6_3	EMPTY	F4.58	0	0	0	0	0	0	1	1	1
F_4_6_4	EMPTY	F4.59	0	0	0	0	0	0	1	1	1
F_4_6_5	EMPTY	F4.60	0	0	0	0	0	0	1	1	1
F_4_6_6	EDI	F4.61	0	0	0	0	0	0	1	1		1
F_4_6_7	VAR	F4.62	9.5	1	0	1	0	10							2017-04-13
F_4_6_8	NIL1	F4.63	0	0	0	0	0	0	1	1		1
F_4_6_9	VAR	F4.64	0	0	0	0	0	0	1	1
F_4_6_10	BRO	F4.65	0	0	0	0	0	0	1	1	1
F_4_6_11	BRO	F4.66	14.5	1	0	8	0	1							2017-05-03
F_5_1_1	COL	F5.1	0	0	0	0	0	0	1	1		1	1	1	2016-10-04	2016-10-04
F_5_1_2	LOV	F5.2	5	2	1	4	0	0		1					2017-04-05
F_5_1_3	VIN3-1	F5.3	1	1	0	0	0	2							2017-04-09
F_5_1_4	EDI	F5.4	0	0	0	0	0	0	1	1
F_5_1_5	EDI	F5.5	0	0	0	0	0	0	1	1
F_5_1_6	EMPTY	F5.6	0	0	0	0	0	0	1	1	1
F_5_1_7	ULL	F5.7	31.5	1	0	9	14	174							2017-04-05
F_5_1_8	ULLN	F5.8	18	13	12	2	0	179						1	2016-10-11
F_5_1_9	LOV	F5.9	28.5	1	0	4	4	31							2017-04-09
F_5_1_10	ULLN	F5.10	0	0	0	0	0	0	1	1	1
F_5_1_11	SF2	F5.11	10	13	12	0	0	0		1				1	2016-10-18
F_5_2_1	NIL2	F5.12	0	0	0	0	0	0		1				1	2016-10-11
F_5_2_2	SF2	F5.13	20.5	8	7	8	0	139						1	2016-10-11
F_5_2_3	NIL1	F5.14	9	14	13	0	0	0		1					2017-05-03
F_5_2_4	SF2	F5.15	10	12	11	3	0	0		1				1	2016-10-11
F_5_2_5	BRO	F5.16	0	0	0	0	0	0	1	1
F_5_2_6	NIL2	F5.17	0	0	0	0	0	0		1				1	2016-10-04	2016-10-18
F_5_2_7	LOV	F5.18	18	2	1	2	0	12							2017-04-09
F_5_2_8	ULLN	F5.19	18	20	19	0	0	212						1	2016-10-18	2017-05-03
F_5_2_9	EMPTY	F5.20	0	0	0	0	0	0	1	1	1
F_5_2_10	NIL2	F5.21	6.5	12	11	0	0	0		1				1	2016-10-11
F_5_2_11	EMPTY	F5.22	0	0	0	0	0	0	1	1	1
F_5_3_1	VIN3-1	F5.23	11.5	10	9	1	0	83						1	2016-10-11	2017-04-05
F_5_3_2	VIN3-1	F5.24	1	1	0	0	0	0		1				1	2016-10-11	2017-04-05
F_5_3_3	VARN	F5.25	13.5	12	11	1	0	174						1	2016-10-11	2017-04-05
F_5_3_4	COL	F5.26	0	0	0	0	0	0	1	1		1	1	1	2016-10-04	2016-10-04
F_5_3_5	ULLN	F5.27	0	0	0	0	0	0	1	1		1		1	2016-10-11
F_5_3_6	VIN3-1	F5.28	0	0	0	0	0	0		1					2017-04-05
F_5_3_7	LOV	F5.29	7.5	1	0	0	0	0		1					2017-04-13
F_5_3_8	EDI	F5.30	0	0	0	0	0	0	1	1		1
F_5_3_9	COL	F5.31	0	0	0	0	0	0		1		1	1	1	2016-10-04	2016-10-04
F_5_3_10	ULLN	F5.32	0	0	0	0	0	0		1		1	1	1	2016-10-18
F_5_3_11	EMPTY	F5.33	0	0	0	0	0	0	1	1	1
F_5_4_1	EDIN	F5.34	0	0	0	0	0	0		1		1	1	1	2016-10-18
F_5_4_2	BRO	F5.35	18.5	13	12	6	1	37							2017-04-09
F_5_4_3	EDIN	F5.36	0	0	0	0	0	0		1		1	1	1	2016-10-11
F_5_4_4	COL	F5.37	0	0	0	0	0	0		1		1	1	1	2016-10-04	2016-10-04
F_5_4_5	NIL1	F5.38	0	0	0	0	0	0		1		1	1	1	2016-10-11
F_5_4_6	VAR	F5.39	0	0	0	0	0	0	1	1		1
F_5_4_7	NIL1	F5.40	0	0	0	0	0	0	1	1		1
F_5_4_8	ULL	F5.41	8	1	0	0	0	0		1					2017-04-05
F_5_4_9	EDI	F5.42	0	0	0	0	0	0	1	1		1
F_5_4_10	EMPTY	F5.43	0	0	0	0	0	0	1	1	1
F_5_4_11	VAR	F5.44	1	1	0	0	0	0		1					2017-04-13
F_5_5_1	EDI	F5.45	0	0	0	0	0	0	1	1	1
F_5_5_2	NIL1	F5.46	0	0	0	0	0	0	1	1		1
F_5_5_3	VARN	F5.47	0	0	0	0	0	0		1		1	1	1	2016-10-11
F_5_5_4	ULL	F5.48	13.5	4	3	1	0	4							2017-05-03
F_5_5_5	EDIN	F5.49	0	0	0	0	0	0		1		1	1	1	2016-10-18
F_5_5_6	LOV	F5.50	0	0	0	0	0	0		1		1	1	1	2016-10-11
F_5_5_7	BRO	F5.51	0	0	0	0	0	0	1	1		1
F_5_5_8	EDIN	F5.52	0	0	0	0	0	0		1		1	1	1	2016-10-11
F_5_5_9	VARN	F5.53	0	0	0	0	0	0		1		1	1	1	2016-10-11
F_5_5_10	VAR	F5.54	0	0	0	0	0	0	1	1		1
F_5_5_11	COL	F5.55	0	0	0	0	0	0		1		1	1	1	2016-10-04	2016-10-04
F_5_6_1	LOV	F5.56	2	1	0	0	0	0		1					2017-04-13
F_5_6_2	LOV	F5.57	0	0	0	0	0	0		1					2017-04-13
F_5_6_3	SF2	F5.58	0	0	0	0	0	0		1				1	2016-10-04
F_5_6_4	EMPTY	F5.59	0	0	0	0	0	0	1	1	1
F_5_6_5	EMPTY	F5.60	0	0	0	0	0	0	1	1	1
F_5_6_6	NIL1	F5.61	0	0	0	0	0	0	1	1	1
F_5_6_7	ULL	F5.62	3	1	0	0	0	0		1					2017-04-13
F_5_6_8	COL	F5.63	0	0	0	0	0	0		1		1	1	1	2016-10-04	2016-10-11
F_5_6_9	SF2	F5.64	0	0	0	0	0	0		1		1	1	1	2016-10-18
F_5_6_10	EDIN	F5.65	0	0	0	0	0	0	1	1		1
F_5_6_11	NIL1	F5.66	0	0	0	0	0	0	1	1
F_6_1_1	COL	F6.1	0	0	0	0	0	0		1		1	1	1	2016-10-04	2016-10-04
F_6_1_2	LOV	F6.2	8	1	0	0	0	0		1					2017-04-13
F_6_1_3	EMPTY	F6.3	0	0	0	0	0	0	1	1	1
F_6_1_4	VIN3-1	F6.4	0	0	0	0	0	0		1		1	1	1	2016-10-04
F_6_1_5	NIL2	F6.5	0	0	0	0	0	0		1		1	1	1	2016-10-11
F_6_1_6	NIL2	F6.6	0	0	0	0	0	0		1		1	1	1	2016-10-11
F_6_1_7	EDIN	F6.7	0	0	0	0	0	0	1	1		1
F_6_1_8	VIN3-1	F6.8	0	0	0	0	0	0		1		1	1	1	2016-10-11
F_6_1_9	ULL	F6.9	8.5	3	2	1	0	0		1					2017-04-09
F_6_1_10	COL	F6.10	0	0	0	0	0	0		1		1	1	1	2016-10-04	2016-10-18
F_6_1_11	NIL2	F6.11	15.5	10	9	0	0	43						1	2016-10-11	2016-10-18
F_6_2_1	ULLN	F6.12	0	0	0	0	0	0		1		1	1	1	2016-10-04	2016-10-18
F_6_2_2	VARN	F6.13	0	0	0	0	0	0		1		1	1	1	2016-10-11
F_6_2_3	VAR	F6.14	0	0	0	0	0	0	1	1
F_6_2_4	NIL1	F6.15	0	0	0	0	0	0	1	1		1
F_6_2_5	VARN	F6.16	0	0	0	0	0	0	1	1		1
F_6_2_6	BRO	F6.17	16.5	2	1	3	0	23							2017-05-03
F_6_2_7	ULL	F6.18	0	0	0	0	0	0		1					2017-05-03
F_6_2_8	COL	F6.19	0	0	0	0	0	0		1		1	1	1	2016-10-04	2016-10-04
F_6_2_9	VIN3-1	F6.20	0	0	0	0	0	0	1	1	1
F_6_2_10	NIL1	F6.21	9	12	11	0	0	0		1				1	2016-10-11
F_6_2_11	VAR	F6.22	0	0	0	0	0	0		1				1	2016-10-11
F_6_3_1	COL	F6.23	0	0	0	0	0	0		1		1	1	1	2016-10-04	2016-10-04
F_6_3_2	SF2	F6.24	0	0	0	0	0	0		1		1	1	1	2016-10-11
F_6_3_3	BRO	F6.25	0	0	0	0	0	0	1	1		1
F_6_3_4	NIL2	F6.26	0	0	0	0	0	0		1		1	1	1	2016-10-04
F_6_3_5	SF2	F6.27	0	0	0	0	0	0		1		1	1	1	2016-10-04	2016-10-04
F_6_3_6	EMPTY	F6.28	0	0	0	0	0	0	1	1	1
F_6_3_7	ULLN	F6.29	0	0	0	0	0	0	1	1		1
F_6_3_8	LOV	F6.30	0	0	0	0	0	0		1					2017-04-13
F_6_3_9	LOV	F6.31	0	0	0	0	0	0		1					2017-04-13
F_6_3_10	EDIN	F6.32	0	0	0	0	0	0		1		1	1	1	2016-10-04	2016-10-18
F_6_3_11	EMPTY	F6.33	0	0	0	0	0	0	1	1	1
F_6_4_1	EMPTY	F6.34	0	0	0	0	0	0	1	1	1
F_6_4_2	EMPTY	F6.35	0	0	0	0	0	0	1	1	1
F_6_4_3	EDI	F6.36	0	0	0	0	0	0	1	1		1
F_6_4_4	NIL2	F6.37	0	0	0	0	0	0		1		1	1	1	2016-10-11
F_6_4_5	VAR	F6.38	0	0	0	0	0	0	1	1		1
F_6_4_6	EDIN	F6.39	0	0	0	0	0	0		1		1	1	1	2016-10-11	2016-10-18
F_6_4_7	ULL	F6.40	0	0	0	0	0	0	1	1
F_6_4_8	BRO	F6.41	0	0	0	0	0	0	1	1		1
F_6_4_9	ULL	F6.42	0	0	0	0	0	0	1	1		1
F_6_4_10	ULLN	F6.43	0	0	0	0	0	0		1		1	1	1	2016-10-11
F_6_4_11	ULLN	F6.44	21	11	10	20	0	121						1	2016-10-04	2016-10-18
F_6_5_1	NIL1	F6.45	0	0	0	0	0	0		1		1	1	1	2016-10-11
F_6_5_2	EDI	F6.46	0	0	0	0	0	0	1	1		1
F_6_5_3	EDI	F6.47	0	0	0	0	0	0	1	1		1
F_6_5_4	ULL	F6.48	0	0	0	0	0	0	1	1
F_6_5_5	VAR	F6.49	0	0	0	0	0	0	1	1		1
F_6_5_6	EMPTY	F6.50	0	0	0	0	0	0	1	1	1
F_6_5_7	EMPTY	F6.51	0	0	0	0	0	0	1	1	1
F_6_5_8	ULL	F6.52	0	0	0	0	0	0	1	1
F_6_5_9	NIL1	F6.53	0	0	0	0	0	0		1		1	1	1	2016-10-04
F_6_5_10	VARN	F6.54	0	0	0	0	0	0	1	1		1
F_6_5_11	ULL	F6.55	0	0	0	0	0	0	1	1	1
F_6_6_1	EMPTY	F6.56	0	0	0	0	0	0	1	1	1
F_6_6_2	EMPTY	F6.57	0	0	0	0	0	0	1	1	1
F_6_6_3	LOV	F6.58	0	0	0	0	0	0	1	1		1
F_6_6_4	EDI	F6.59	0	0	0	0	0	0		1		1	1	1	2016-10-04
F_6_6_5	EMPTY	F6.60	0	0	0	0	0	0	1	1	1
F_6_6_6	EMPTY	F6.61	0	0	0	0	0	0	1	1	1
F_6_6_7	VAR	F6.62	0	0	0	0	0	0	1	1		1
F_6_6_8	ULLN	F6.63	0	0	0	0	0	0		1		1	1	1	2016-10-04
F_6_6_9	EDIN	F6.64	0	0	0	0	0	0		1		1	1	1	2016-10-04	2016-10-18
F_6_6_10	EMPTY	F6.65	0	0	0	0	0	0	1	1	1
F_6_6_11	EDIN	F6.66	0	0	0	0	0	0		1		1	1	1	2016-10-04
F_7_1_1	EDI	F7.1	0	0	0	0	0	0	1	1		1
F_7_1_2	COL	F7.2	0	0	0	0	0	0		1		1	1	1	2016-10-04	2016-10-04
F_7_1_3	SF2	F7.3	0	0	0	0	0	0		1		1	1	1	2016-10-11
F_7_1_4	NIL2	F7.4	20.5	11	10	14	0	178							2017-04-13
F_7_1_5	COL	F7.5	0	0	0	0	0	0		1		1	1	1	2016-10-11	2016-10-11
F_7_1_6	SF2	F7.6	0	0	0	0	0	0		1		1	1	1	2016-10-11
F_7_1_7	BRO	F7.7	21	2	1	13	0	33							2017-04-13
F_7_1_8	EMPTY	F7.8	0	0	0	0	0	0	1	1	1
F_7_1_9	EDIN	F7.9	22	6	5	5	0	110						1	2016-10-04	2016-10-11
F_7_1_10	ULLN	F7.10	13.5	9	8	1	0	2							2017-05-09
F_7_1_11	EMPTY	F7.11	0	0	0	0	0	0	1	1	1
F_7_2_1	VARN	F7.12	0	0	0	0	0	0		1				1	2016-10-18
F_7_2_2	SF2	F7.13	0	0	0	0	0	0		1		1	1	1	2016-10-04	2016-10-04
F_7_2_3	SF2	F7.14	0	0	0	0	0	0		1		1	1	1	2016-10-11
F_7_2_4	EMPTY	F7.15	0	0	0	0	0	0	1	1	1
F_7_2_5	EMPTY	F7.16	0	0	0	0	0	0	1	1	1
F_7_2_6	ULL	F7.17	0	0	0	0	0	0		1					2017-04-13
F_7_2_7	ULL	F7.18	0	0	0	0	0	0	1	1					2017-04-13
F_7_2_8	VIN3-1	F7.19	8.5	4	3	0	0	17						1	2016-10-11	2016-10-18
F_7_2_9	COL	F7.20	0	0	0	0	0	0	1	1				1	2016-10-04	2016-10-11
F_7_2_10	VIN3-1	F7.21	0	0	0	0	0	0		1				1	2016-10-11	2016-10-18
F_7_2_11	BRO	F7.22	19.5	3	2	17	0	24							2017-04-13
F_7_3_1	VIN3-1	F7.23	0	0	0	0	0	0		1				1	2016-10-04	2016-10-11
F_7_3_2	ULLN	F7.24	0	0	0	0	0	0		1				1	2016-10-04
F_7_3_3	COL	F7.25	0	0	0	0	0	0		1		1	1	1	2016-10-04	2016-10-04
F_7_3_4	ULLN	F7.26	19.5	6	5	8	0	74						1	2016-10-04	2016-10-11
F_7_3_5	VARN	F7.27	0	0	0	0	0	0		1		1	1	1	2016-10-04
F_7_3_6	VARN	F7.28	13.5	4	3	12	0	61						1	2016-10-11
F_7_3_7	NIL1	F7.29	0	0	0	0	0	0		1				1	2016-10-11
F_7_3_8	VIN3-1	F7.30	0	0	0	0	0	0	1	1	1
F_7_3_9	BRO	F7.31	13	3	2	6	0	32							2017-04-13
F_7_3_10	ULL	F7.32	0	0	0	0	0	0		1					2017-04-13
F_7_3_11	LOV	F7.33	15.5	1	0	3	0	1							2017-04-13
F_7_4_1	SF2	F7.34	0	0	0	0	0	0	1	1	1
F_7_4_2	EDIN	F7.35	0	0	0	0	0	0		1		1	1	1	2016-10-04	2016-10-18
F_7_4_3	ULL	F7.36	2.5	1	0	0	0	0		1					2017-05-03
F_7_4_4	COL	F7.37	0	0	0	0	0	0		1		1	1	1	2016-10-04	2016-10-04
F_7_4_5	VIN3-1	F7.38	0	0	0	0	0	0		1				1	2016-10-04	2016-10-18
F_7_4_6	NIL1	F7.39	0	0	0	0	0	0		1		1	1	1	2016-10-18
F_7_4_7	ULL	F7.40	0	0	0	0	0	0	1	1		1
F_7_4_8	NIL2	F7.41	0	0	0	0	0	0	1	1		1
F_7_4_9	VARN	F7.42	0	0	0	0	0	0	1	1
F_7_4_10	COL	F7.43	0	0	0	0	0	0		1		1	1	1	2016-10-04	2016-10-04
F_7_4_11	EDIN	F7.44	21	11	10	11	0	173						1	2016-10-04	2017-04-05
F_7_5_1	LOV	F7.45	0	0	0	0	0	0		1					2017-04-13
F_7_5_2	VIN3-1	F7.46	0	0	0	0	0	0		1				1	2016-10-11
F_7_5_3	EDIN	F7.47	0	0	0	0	0	0		1		1	1	1	2016-10-11
F_7_5_4	VAR	F7.48	0	0	0	0	0	0	1	1
F_7_5_5	VARN	F7.49	0	0	0	0	0	0	1	1		1
F_7_5_6	ULL	F7.50	0	0	0	0	0	0	1	1
F_7_5_7	NIL2	F7.51	0	0	0	0	0	0		1		1	1	1	2016-10-11
F_7_5_8	NIL2	F7.52	0	0	0	0	0	0		1				1	2016-10-04	2016-10-11
F_7_5_9	SF2	F7.53	0	0	0	0	0	0		1		1	1	1	2016-10-04	2016-10-11
F_7_5_10	EMPTY	F7.54	0	0	0	0	0	0	1	1	1
F_7_5_11	VIN3-1	F7.55	0	0	0	0	0	0		1				1	2016-10-04	2016-11-18
F_7_6_1	VIN3-1	F7.56	0	0	0	0	0	0	1	1	1
F_7_6_2	EDI	F7.57	0	0	0	0	0	0		1		1	1	1	2016-10-18
F_7_6_3	LOV	F7.58	0	0	0	0	0	0		1					2017-04-13
F_7_6_4	VIN3-1	F7.59	0	0	0	0	0	0		1		1	1	1	2016-10-11
F_7_6_5	ULLN	F7.60	0	0	0	0	0	0		1		1	1	1	2016-10-11
F_7_6_6	EDI	F7.61	0	0	0	0	0	0	1	1		1
F_7_6_7	VIN3-1	F7.62	0	0	0	0	0	0	1	1		1
F_7_6_8	COL	F7.63	0	0	0	0	0	0		1		1	1	1	2016-10-04	2016-10-11
F_7_6_9	EMPTY	F7.64	0	0	0	0	0	0	1	1	1
F_7_6_10	EDI	F7.65	0	0	0	0	0	0	1	1		1
F_7_6_11	BRO	F7.66	0	0	0	0	0	0	1	1	1
F_8_1_1	VAR	F8.1	5	1	0	0	0	0		1
F_8_1_2	ULL	F8.2	14.5	1	0	0	0	0		1					2017-04-13
F_8_1_3	VIN3-1	F8.3	4	1	0	0	0	0		1				1	2016-10-04
F_8_1_4	ULLN	F8.4	13.5	8	7	4	0	13							2017-04-05
F_8_1_5	EDIN	F8.5	0	0	0	0	0	0		1		1	1	1	2016-10-11
F_8_1_6	VARN	F8.6	0	0	0	0	0	0		1		1	1	1	2016-10-11
F_8_1_7	EDIN	F8.7	0	0	0	0	0	0		1		1	1	1	2016-10-04	2016-10-11
F_8_1_8	NIL1	F8.8	0	0	0	0	0	0		1		1	1	1	2016-10-11
F_8_1_9	VIN3-1	F8.9	0	0	0	0	0	0	1	1	1
F_8_1_10	VAR	F8.10	21.5	1	0	1	0	26							2017-04-09
F_8_1_11	COL	F8.11	0	0	0	0	0	0	1	1	1
F_8_2_1	LOV	F8.12	25	2	1	5	0	34							2017-04-05
F_8_2_2	VARN	F8.13	13.5	11	10	0	0	110							2017-04-05
F_8_2_3	BRO	F8.14	7	3	2	0	0	0		1					2017-04-13
F_8_2_4	ULLN	F8.15	0	0	0	0	0	0		1				1	2016-10-11
F_8_2_5	EMPTY	F8.16	0	0	0	0	0	0	1	1	1
F_8_2_6	EMPTY	F8.17	0	0	0	0	0	0	1	1	1
F_8_2_7	NIL2	F8.18	16	9	8	11	0	134						1	2016-10-04	2016-10-11
F_8_2_8	ULL	F8.19	10	3	2	3	0	0		1					2017-04-13
F_8_2_9	BRO	F8.20	15	4	3	0	0	1							2017-04-13
F_8_2_10	NIL2	F8.21	0	0	0	0	0	0		1		1	1	1	2016-10-11
F_8_2_11	LOV	F8.22	32	1	0	6	6	64							2017-04-13
F_8_3_1	VAR	F8.23	0	0	0	0	0	0	1	1		1
F_8_3_2	ULL	F8.24	9.5	1	0	0	0	0		1					2017-04-05
F_8_3_3	EMPTY	F8.25	0	0	0	0	0	0	1	1	1
F_8_3_4	SF2	F8.26	0	0	0	0	0	0		1				1	2016-10-04	2016-10-18
F_8_3_5	NIL1	F8.27	0	0	0	0	0	0		1		1	1	1	2016-10-04	2016-10-04
F_8_3_6	ULL	F8.28	26.5	1	0	5	0	81							2017-04-13
F_8_3_7	EMPTY	F8.29	0	0	0	0	0	0	1	1	1
F_8_3_8	LOV	F8.30	34	1	0	3	0	61							2017-04-13
F_8_3_9	ULL	F8.31	0	0	0	0	0	0		1					2017-04-13
F_8_3_10	EDIN	F8.32	0	0	0	0	0	0		1		1	1	1	2016-10-11
F_8_3_11	VAR	F8.33	21.5	1	0	1	0	36							2017-04-13
F_8_4_1	VIN3-1	F8.34	0	0	0	0	0	0		1				1	2016-10-04
F_8_4_2	ULL	F8.35	20	1	0	11	10	18							2017-04-13
F_8_4_3	VAR	F8.36	0	0	0	0	0	0		1					2017-04-13
F_8_4_4	COL	F8.37	0	0	0	0	0	0	1	1		1	1	1	2016-10-04	2016-10-04
F_8_4_5	BRO	F8.38	0	0	0	0	0	0	1	1		1
F_8_4_6	EDIN	F8.39	0	0	0	0	0	0	1	1		1
F_8_4_7	NIL2	F8.40	0	0	0	0	0	0	1	1		1
F_8_4_8	ULLN	F8.41	14	16	15	9	0	48						1	2016-10-04
F_8_4_9	EMPTY	F8.42	0	0	0	0	0	0	1	1	1
F_8_4_10	SF2	F8.43	15.5	11	10	0	0	59							2017-04-05
F_8_4_11	COL	F8.44	0	0	0	0	0	0		1		1	1	1	2016-10-04	2016-10-04
F_8_5_1	VARN	F8.45	0	0	0	0	0	0	1	1
F_8_5_2	VIN3-1	F8.46	0	0	0	0	0	0		1				1	2016-10-04
F_8_5_3	EDI	F8.47	0	0	0	0	0	0	1	1		1
F_8_5_4	NIL1	F8.48	13.5	11	10	0	0	45						1	2016-10-04
F_8_5_5	LOV	F8.49	0	0	0	0	0	0	1	1
F_8_5_6	EDIN	F8.50	0	0	0	0	0	0		1		1	1	1	2016-10-04
F_8_5_7	NIL1	F8.51	0	0	0	0	0	0		1				1	2016-10-11
F_8_5_8	VAR	F8.52	13.5	1	0	1	1	17							2017-04-09
F_8_5_9	VARN	F8.53	0	0	0	0	0	0		1		1	1	1	2016-10-11
F_8_5_10	LOV	F8.54	1	1	0	0	0	0		1					2017-04-09
F_8_5_11	VAR	F8.55	1.5	1	0	0	0	0		1					2017-04-05
F_8_6_1	SF2	F8.56	0	0	0	0	0	0		1		1	1	1	2016-10-11
F_8_6_2	ULL	F8.57	25	1	0	7	6	91							2017-04-13
F_8_6_3	BRO	F8.58	5	3	2	0	0	0		1					2017-04-13
F_8_6_4	EDIN	F8.59	0	0	0	0	0	0		1				1	2016-10-04	2016-10-11
F_8_6_5	EDIN	F8.60	0	0	0	0	0	0		1					2017-04-05
F_8_6_6	SF2	F8.61	0	0	0	0	0	0		1		1	1	1	2016-10-11
F_8_6_7	EDI	F8.62	0	0	0	0	0	0	1	1		1
F_8_6_8	VIN3-1	F8.63	0	0	0	0	0	0		1		1	1	1	2016-10-11
F_8_6_9	EMPTY	F8.64	0	0	0	0	0	0	1	1	1
F_8_6_10	EDI	F8.65	0	0	0	0	0	0	1	1		1
F_8_6_11	LOV	F8.66	27	1	0	5	1	68							2017-04-05

## Sheet: South Sweden 2016-17
Tray	Position	Variety	DaysToBudding
19	7	BRO	215
14	17	BRO	216
13	35	BRO	217
15	61	BRO	217
19	8	BRO	217
15	27	BRO	217.5
16	7	BRO	217.5
17	10	BRO	218
17	28	BRO	218
18	38	BRO	218
19	5	BRO	218
13	38	BRO	219
15	31	BRO	219
15	38	BRO	219
16	5	BRO	219
17	41	BRO	219
18	10	BRO	219
19	45	BRO	219
20	16	BRO	219
20	37	BRO	219
16	58	BRO	221
17	11	BRO	221
20	65	BRO	221
13	14	BRO	224
14	41	BRO	224
18	14	BRO	224
18	60	BRO	224
13	46	BRO	225
14	1	BRO	228
16	27	BRO	228
20	42	BRO	228
14	62	BRO	232
17	27	COL	202
18	37	COL	204
13	19	COL	205
16	33	COL	205
18	49	COL	205
19	39	COL	205
15	46	COL	205.5
15	39	COL	206
16	62	COL	206
17	37	COL	206
19	21	COL	206
13	61	COL	207
14	19	COL	207
15	60	COL	207
19	40	COL	207
20	11	COL	207
14	60	COL	208
16	9	COL	208
17	52	COL	208
19	57	COL	208
20	18	COL	208
14	7	COL	210
18	32	COL	210
20	58	COL	211
20	26	COL	212
16	15	COL	213
17	6	COL	213
18	45	COL	216
13	64	COL	232
13	58	COL	Dead
14	59	COL	Dead
15	50	COL	Dead
15	35	EDI	211.5
16	51	EDI	211.5
17	15	EDI	211.5
15	13	EDI	213
16	10	EDI	213
18	28	EDI	213
19	53	EDI	213
19	66	EDI	213
15	51	EDI	214.5
16	66	EDI	214.5
17	25	EDI	214.5
13	5	EDI	215
16	55	EDI	215
18	66	EDI	215
19	52	EDI	215
20	6	EDI	215
20	43	EDI	215
13	7	EDI	216
13	30	EDI	216
15	40	EDI	216
18	27	EDI	216
20	22	EDI	216
14	50	EDI	217
14	56	EDI	217.5
18	25	EDI	219
20	34	EDI	219
14	61	EDI	220
17	1	EDI	220
14	36	EDI	223
13	23	EDI	226
17	2	EDI	Dead
19	62	EDI	Dead
16	50	EDIN	209
17	23	EDIN	209
14	57	EDIN	210
15	3	EDIN	210
16	60	EDIN	210
19	54	EDIN	210
19	63	EDIN	210
16	22	EDIN	211.5
17	44	EDIN	211.5
18	17	EDIN	211.5
13	40	EDIN	213
15	17	EDIN	213
15	53	EDIN	213
18	51	EDIN	213
19	20	EDIN	213
20	28	EDIN	213
20	2	EDIN	214
17	31	EDIN	214.5
13	42	EDIN	215
15	14	EDIN	215
18	21	EDIN	215
20	15	EDIN	215
13	3	EDIN	216
14	11	EDIN	216
13	27	EDIN	219
20	64	EDIN	219
16	34	EDIN	220
14	64	EDIN	221
19	3	EDIN	225
18	34	EDIN	227
17	64	EDIN	232
14	32	EDIN	Dead
13	6	LOV	214
15	12	LOV	214
17	56	LOV	214
14	3	LOV	214.5
18	6	LOV	214.5
15	6	LOV	215
15	11	LOV	215
16	12	LOV	215
17	40	LOV	215
18	48	LOV	215
18	65	LOV	215
19	15	LOV	215
19	41	LOV	215
19	64	LOV	215
20	5	LOV	215
14	25	LOV	216
16	53	LOV	216
17	24	LOV	216
20	19	LOV	216
13	34	LOV	217
15	52	LOV	217
17	32	LOV	217
14	18	LOV	217.5
20	40	LOV	217.5
13	18	LOV	218
20	4	LOV	218
16	24	LOV	219
16	63	LOV	225
19	30	LOV	225
18	36	LOV	227
14	63	LOV	233
13	49	LOV	Dead
18	55	NIL1	213
14	15	NIL1	214
17	54	NIL1	214
15	23	NIL1	214.5
15	45	NIL1	214.5
16	32	NIL1	214.5
17	16	NIL1	214.5
19	6	NIL1	214.5
19	24	NIL1	214.5
13	16	NIL1	215
13	41	NIL1	215
15	55	NIL1	215
16	16	NIL1	215
20	17	NIL1	215
20	27	NIL1	215
14	13	NIL1	216
17	4	NIL1	216
17	66	NIL1	216
20	48	NIL1	216
20	12	NIL1	217
13	66	NIL1	219
14	23	NIL1	219
14	45	NIL1	219
16	26	NIL1	219
16	61	NIL1	219
18	24	NIL1	222
15	44	NIL1	226
18	53	NIL1	228
18	61	NIL1	228
19	37	NIL1	228
13	62	NIL1	232
19	49	NIL1	Dead
18	42	NIL2	208.5
13	45	NIL2	210
17	43	NIL2	210
19	22	NIL2	210
19	23	NIL2	210
20	25	NIL2	210
14	5	NIL2	211.5
14	38	NIL2	211.5
17	29	NIL2	211.5
17	48	NIL2	211.5
18	29	NIL2	211.5
20	29	NIL2	211.5
15	4	NIL2	212
13	29	NIL2	213
18	12	NIL2	213
20	14	NIL2	213
16	39	NIL2	215
19	55	NIL2	215
13	39	NIL2	216
13	48	NIL2	216
15	18	NIL2	217
14	2	NIL2	218
14	52	NIL2	219
16	13	NIL2	219
16	40	NIL2	226
18	58	NIL2	226
15	34	NIL2	228
17	62	NIL2	229
19	11	NIL2	232
15	48	NIL2	Dead
16	44	NIL2	Dead
20	13	NIL2	Dead
18	20	SF2	207
15	26	SF2	210
18	5	SF2	210
13	12	SF2	211
15	16	SF2	211
16	38	SF2	211.5
20	62	SF2	211.5
14	22	SF2	213
18	1	SF2	213
19	2	SF2	213
20	66	SF2	213
15	56	SF2	214
18	54	SF2	214
19	18	SF2	214
16	3	SF2	214.5
17	33	SF2	214.5
17	59	SF2	215
20	24	SF2	215
17	20	SF2	216
17	58	SF2	216
19	16	SF2	216
19	25	SF2	216
13	10	SF2	217
16	1	SF2	218
16	4	SF2	219
14	66	SF2	232
20	55	SF2	233
13	22	SF2	Dead
13	32	SF2	Dead
14	42	SF2	Dead
14	47	SF2	Dead
15	36	SF2	Dead
18	43	ULL	211
16	45	ULL	212
17	30	ULL	213
19	61	ULL	213
20	10	ULL	213
13	54	ULL	214
17	45	ULL	214
15	10	ULL	214.5
18	9	ULL	214.5
19	33	ULL	214.5
14	21	ULL	215
15	29	ULL	215
15	63	ULL	215
18	11	ULL	215
19	4	ULL	215
19	19	ULL	215
20	41	ULL	215
16	48	ULL	216
16	52	ULL	216
17	57	ULL	216
18	33	ULL	216
20	57	ULL	217
14	39	ULL	217.5
14	51	ULL	218
13	4	ULL	219
15	25	ULL	219
20	49	ULL	232
13	36	ULL	Dead
14	10	ULL	Dead
16	56	ULL	Dead
17	60	ULL	Dead
13	26	ULL	Dead
15	43	ULLN	210
19	42	ULLN	210
20	30	ULLN	210
13	15	ULLN	211
16	21	ULLN	213
16	59	ULLN	213
18	8	ULLN	213
14	28	ULLN	214
15	62	ULLN	214.5
17	19	ULLN	214.5
17	53	ULLN	214.5
19	46	ULLN	214.5
20	36	ULLN	214.5
20	52	ULLN	214.5
14	54	ULLN	215
18	40	ULLN	215
20	3	ULLN	215
13	37	ULLN	216
14	65	ULLN	216
15	9	ULLN	216
15	33	ULLN	216
14	27	ULLN	217.5
16	2	ULLN	219
17	21	ULLN	219
19	43	ULLN	219
16	25	ULLN	222
13	44	ULLN	228
18	30	ULLN	228
13	60	ULLN	232
17	18	ULLN	Dead
18	39	ULLN	Dead
19	47	ULLN	Dead
14	4	VAR	212
14	49	VAR	213
15	5	VAR	213
15	58	VAR	214
16	18	VAR	214.5
13	50	VAR	215
13	52	VAR	215
17	35	VAR	215
19	27	VAR	215
19	38	VAR	215
20	31	VAR	215
20	38	VAR	215
14	26	VAR	216
16	42	VAR	216
17	3	VAR	216
19	13	VAR	216
19	14	VAR	216
18	44	VAR	217
20	8	VAR	217
15	30	VAR	217.5
17	65	VAR	217.5
16	46	VAR	218
20	59	VAR	218
13	21	VAR	219
16	49	VAR	219
18	47	VAR	219
17	36	VAR	225
15	22	VAR	240
13	24	VAR	Dead
14	46	VAR	Dead
18	7	VAR	Dead
18	64	VAR	Dead
13	28	VARN	210
15	59	VARN	210
15	28	VARN	211.5
19	10	VARN	212
19	26	VARN	212
19	50	VARN	213
13	1	VARN	214
17	38	VARN	214.5
18	22	VARN	214.5
16	47	VARN	215
20	53	VARN	215
17	12	VARN	216
15	66	VARN	218
19	48	VARN	218
20	20	VARN	218
13	9	VARN	219
16	43	VARN	219
16	54	VARN	219
17	34	VARN	219
20	33	VARN	219
18	23	VARN	220
14	31	VARN	223
14	55	VARN	225
18	62	VARN	225
20	51	VARN	225
17	8	VARN	230
13	11	VARN	237
14	44	VARN	Dead
14	48	VARN	Dead
15	8	VARN	Dead
16	31	VARN	Dead
18	41	VARN	Dead
14	58	VIN3-1	234
15	2	VIN3-1	235
18	16	VIN3-1	237
16	29	VIN3-1	238
19	44	VIN3-1	242
19	51	VIN3-1	242
20	23	VIN3-1	242
20	32	VIN3-1	242
16	6	VIN3-1	244
14	14	VIN3-1	247
17	55	VIN3-1	247
19	17	VIN3-1	247
16	28	VIN3-1	249
19	29	VIN3-1	249
15	41	VIN3-1	250
13	43	VIN3-1	252
14	12	VIN3-1	252
17	46	VIN3-1	252
20	7	VIN3-1	253
13	2	VIN3-1	Dead
13	17	VIN3-1	Dead
13	63	VIN3-1	Dead
14	35	VIN3-1	Dead
15	37	VIN3-1	Dead
15	54	VIN3-1	Dead
16	36	VIN3-1	Dead
17	50	VIN3-1	Dead
17	51	VIN3-1	Dead
18	26	VIN3-1	Dead
18	35	VIN3-1	Dead
18	52	VIN3-1	Dead
20	63	VIN3-1	Dead

## Sheet: Norwich 2016-17 'field'
Tray No:	Move date	Row	Column	Flowering date	Genotype	Days to bolting
5	2017-03-17	1	1	dead	VIN3-1
5	2017-03-17	2	1	x
5	2017-03-17	3	1	2017-02-03	NDX	155
5	2017-03-17	4	1	2017-02-20	BRO	172
5	2017-03-17	5	1	2017-01-27	EDIN	148
5	2017-03-17	6	1	2017-02-01	VAL	153
5	2017-03-17	7	1	2017-01-27	EDI	148
5	2017-03-17	8	1	x	flc2
5	2017-03-17	9	1	2017-01-30	NIL2	151
5	2017-03-17	10	1	x
5	2017-03-17	11	1	2017-03-10	VRN5	190
5	2017-03-17	1	2	x
5	2017-03-17	2	2	dead	FLDF
5	2017-03-17	3	2	2016-11-03	EFS	63
5	2017-03-17	4	2	2017-01-13	BRON	134
5	2017-03-17	5	2	x
5	2017-03-17	6	2	x
5	2017-03-17	7	2	x
5	2017-03-17	8	2	2017-01-05	COL	126
5	2017-03-17	9	2	2017-02-28	VIN3	180
5	2017-03-17	10	2	2017-02-14	FCAF	166
5	2017-03-17	11	2	2017-03-10	VRN2	190
5	2017-03-17	1	3	2017-02-10	ULLN	162
5	2017-03-17	2	3	2017-02-10	LOV	162
5	2017-03-17	3	3	2017-01-16	NIL1	137
5	2017-03-17	4	3	x
5	2017-03-17	5	3	2017-01-09	SF2	130
5	2017-03-17	6	3	x
5	2017-03-17	7	3	2017-01-13	FVEF	134
5	2017-03-17	8	3	2017-01-23	ULL	144
5	2017-03-17	9	3	2017-01-11	LHP	132
5	2017-03-17	10	3	2017-02-03	VARN	155
5	2017-03-17	11	3	2017-02-24	VAR	176
5	2017-03-17	1	4	2017-02-22	VRN5	174
5	2017-03-17	2	4	2017-02-01	VAR	153
5	2017-03-17	3	4	2017-02-03	NDX	155
5	2017-03-17	4	4	2017-01-09	FCAF	130
5	2017-03-17	5	4	2016-11-09	EFS	69
5	2017-03-17	6	4	2017-02-10	ULLN	162
5	2017-03-17	7	4	2016-12-21	COL	111
5	2017-03-17	8	4	x
5	2017-03-17	9	4	2017-01-11	SF2	132
5	2017-03-17	10	4	2017-01-23	NIL1	144
5	2017-03-17	11	4	2017-01-23	VARN	144
5	2017-03-17	1	5	2017-02-03	NIL2	155
5	2017-03-17	2	5	x
5	2017-03-17	3	5	2017-01-09	FVEF	130
5	2017-03-17	4	5	2017-03-10	VRN2	190
5	2017-03-17	5	5	x
5	2017-03-17	6	5	2017-01-23	VAL	144
5	2017-03-17	7	5	2017-01-16	LHP	137
5	2017-03-17	8	5	2017-01-25	LOV	146
5	2017-03-17	9	5	2017-02-28	VIN3	180
5	2017-03-17	10	5	x
5	2017-03-17	11	5	2017-02-03	ULL	155
5	2017-03-17	1	6	x
5	2017-03-17	2	6	x
5	2017-03-17	3	6	2017-01-23	EDIN	144
5	2017-03-17	4	6	2017-01-13	FLDF	134
5	2017-03-17	5	6	x
5	2017-03-17	6	6	x
5	2017-03-17	7	6	2017-01-05	EDI	126
5	2017-03-17	8	6	2017-02-28	VIN3-1	180
5	2017-03-17	9	6	2017-02-20	BRO	172
5	2017-03-17	10	6	2017-01-20	flc2	141
5	2017-03-17	11	6	2017-01-23	BRON	144
13	2017-03-17	1	1	x
13	2017-03-17	2	1	2017-02-16	SF2	168
13	2017-03-17	3	1	2017-01-20	LHP	141
13	2017-03-17	4	1	2017-01-05	EDI	126
13	2017-03-17	5	1	2017-01-27	NIL2	148
13	2017-03-17	6	1	x
13	2017-03-17	7	1	dead	ULL
13	2017-03-17	8	1	2017-02-10	NDX	162
13	2017-03-17	9	1	2017-01-16	NIL1	137
13	2017-03-17	10	1	x
13	2017-03-17	11	1	2017-03-17	BRO	197
13	2017-03-17	1	2	2017-01-09	flc2	130
13	2017-03-17	2	2	2017-01-23	FVEF	144
13	2017-03-17	3	2	2017-03-21	VRN5	201
13	2017-03-17	4	2	x
13	2017-03-17	5	2	2017-01-05	COL	126
13	2017-03-17	6	2	2017-02-24	VIN3-1	176
13	2017-03-17	7	2	x
13	2017-03-17	8	2	2017-01-13	ULLN	134
13	2017-03-17	9	2	x
13	2017-03-17	10	2	2017-01-27	LOV	148
13	2017-03-17	11	2	x
13	2017-03-17	1	3	2017-03-17	VRN2	197
13	2017-03-17	2	3	2017-01-25	VAL	146
13	2017-03-17	3	3	x
13	2017-03-17	4	3	2017-01-11	VAR	132
13	2017-03-17	5	3	2017-01-20	BRON	141
13	2017-03-17	6	3	2017-02-28	VIN3	180
13	2017-03-17	7	3	2017-01-11	VARN	132
13	2017-03-17	8	3	2017-01-13	FCAF	134
13	2017-03-17	9	3	2017-01-09	EDIN	130
13	2017-03-17	10	3	2016-11-23	EFS	83
13	2017-03-17	11	3	2017-01-20	FLDF	141
13	2017-03-17	1	4	2017-01-16	flc2	137
13	2017-03-17	2	4	x
13	2017-03-17	3	4	2017-01-30	LOV	151
13	2017-03-17	4	4	x
13	2017-03-17	5	4	2017-01-23	NIL1	144
13	2017-03-17	6	4	2017-02-22	VRN5	174
13	2017-03-17	7	4	2017-01-25	FVEF	146
13	2017-03-17	8	4	2017-01-27	VAR	148
13	2017-03-17	9	4	x
13	2017-03-17	10	4	2017-01-05	EDI	126
13	2017-03-17	11	4	2016-12-21	COL	111
13	2017-03-17	1	5	2017-02-22	BRO	174
13	2017-03-17	2	5	2017-01-23	FLDF	144
13	2017-03-17	3	5	2017-01-23	NDX	144
13	2017-03-17	4	5	2016-11-17	EFS	77
13	2017-03-17	5	5	2017-01-23	NIL2	144
13	2017-03-17	6	5	x
13	2017-03-17	7	5	2017-03-06	VRN2	186
13	2017-03-17	8	5	2017-01-16	SF2	137
13	2017-03-17	9	5	2017-01-11	BRON	132
13	2017-03-17	10	5	x
13	2017-03-17	11	5	x
13	2017-03-17	1	6	dead	VIN3
13	2017-03-17	2	6	2017-02-10	ULL	162
13	2017-03-17	3	6	2017-02-10	VIN3-1	162
13	2017-03-17	4	6	2017-01-11	EDIN	132
13	2017-03-17	5	6	2017-01-18	ULLN	139
13	2017-03-17	6	6	2017-01-20	LHP	141
13	2017-03-17	7	6	2017-02-01	FCAF	153
13	2017-03-17	8	6	x
13	2017-03-17	9	6	x
13	2017-03-17	10	6	2017-01-27	VAL	148
13	2017-03-17	11	6	2017-01-11	VARN	132
21	2017-03-17	1	1	dead	ULLN
21	2017-03-17	2	1	2017-02-10	ULL	162
21	2017-03-17	3	1	2017-01-09	EDIN	130
21	2017-03-17	4	1	2017-01-16	NIL1	137
21	2017-03-17	5	1	x
21	2017-03-17	6	1	dead	FLDF
21	2017-03-17	7	1	2016-11-17	EFS	77
21	2017-03-17	8	1	2017-01-23	FCAF	144
21	2017-03-17	9	1	2017-01-09	flc2	130
21	2017-03-17	10	1	x
21	2017-03-17	11	1	2017-02-24	BRO	176
21	2017-03-17	1	2	2017-01-20	FVEF	141
21	2017-03-17	2	2	2017-01-30	LOV	151
21	2017-03-17	3	2	x
21	2017-03-17	4	2	2017-01-23	SF2	144
21	2017-03-17	5	2	2017-01-13	EDI	134
21	2017-03-17	6	2	2017-02-01	VAL	153
21	2017-03-17	7	2	2017-01-18	BRON	139
21	2017-03-17	8	2	2017-01-05	COL	126
21	2017-03-17	9	2	2017-01-09	NIL2	130
21	2017-03-17	10	2	x
21	2017-03-17	11	2	2017-03-06	VRN5	186
21	2017-03-17	1	3	2017-02-10	VAR	162
21	2017-03-17	2	3	x
21	2017-03-17	3	3	x
21	2017-03-17	4	3	x
21	2017-03-17	5	3	x
21	2017-03-17	6	3	2017-02-24	VIN3-1	176
21	2017-03-17	7	3	2017-02-01	NDX	153
21	2017-03-17	8	3	2017-02-22	VRN2	174
21	2017-03-17	9	3	2017-02-28	VIN3	180
21	2017-03-17	10	3	2017-01-23	VARN	144
21	2017-03-17	11	3	2017-01-09	LHP	130
21	2017-03-17	1	4	2017-03-10	VIN3-1	190
21	2017-03-17	2	4	2017-01-11	ULLN	132
21	2017-03-17	3	4	2017-01-13	FLDF	134
21	2017-03-17	4	4	2017-02-20	VIN3	172
21	2017-03-17	5	4	x
21	2017-03-17	6	4	2017-01-16	VARN	137
21	2017-03-17	7	4	2017-03-03	VRN5	183
21	2017-03-17	8	4	2016-12-21	flc2	111
21	2017-03-17	9	4	2017-01-05	EDI	126
21	2017-03-17	10	4	2017-02-03	NDX	155
21	2017-03-17	11	4	x
21	2017-03-17	1	5	2017-01-05	COL	126
21	2017-03-17	2	5	2017-01-30	ULL	151
21	2017-03-17	3	5	x
21	2017-03-17	4	5	2017-01-25	VAL	146
21	2017-03-17	5	5	2017-01-11	LHP	132
21	2017-03-17	6	5	2017-01-25	VAR	146
21	2017-03-17	7	5	2017-01-09	SF2	130
21	2017-03-17	8	5	2017-01-13	EDIN	134
21	2017-03-17	9	5	x
21	2017-03-17	10	5	2017-01-13	BRON	134
21	2017-03-17	11	5	2016-11-17	EFS	77
21	2017-03-17	1	6	2017-01-27	FCAF	148
21	2017-03-17	2	6	2017-02-22	BRO	174
21	2017-03-17	3	6	2017-02-01	NIL1	153
21	2017-03-17	4	6	x
21	2017-03-17	5	6	x
21	2017-03-17	6	6	2017-03-17	VRN2	197
21	2017-03-17	7	6	2017-01-05	FVEF	126
21	2017-03-17	8	6	2017-01-09	NIL2	130
21	2017-03-17	9	6	2017-01-27	LOV	148
21	2017-03-17	10	6	x
21	2017-03-17	11	6	x
27	2017-03-17	1	1	x
27	2017-03-17	2	1	x	flc2
27	2017-03-17	3	1	2017-03-03	VAR	183
27	2017-03-17	4	1	2017-03-06	VIN3	186
27	2017-03-17	5	1	2017-01-05	EDI	126
27	2017-03-17	6	1	x
27	2017-03-17	7	1	2017-01-23	FVEF	144
27	2017-03-17	8	1	2017-01-20	BRO	141
27	2017-03-17	9	1	2017-01-23	NIL2	144
27	2017-03-17	10	1	x
27	2017-03-17	11	1	x
27	2017-03-17	1	2	2017-02-14	COL	166
27	2017-03-17	2	2	2017-01-23	NIL1	144
27	2017-03-17	3	2	x
27	2017-03-17	4	2	2017-01-30	LOV	151
27	2017-03-17	5	2	dead	NDX
27	2017-03-17	6	2	2017-03-10	VRN2	190
27	2017-03-17	7	2	2017-01-27	VAL	148
27	2017-03-17	8	2	2017-02-28	VIN3-1	180
27	2017-03-17	9	2	2017-01-23	FLDF	144
27	2017-03-17	10	2	2017-01-16	BRON	137
27	2017-03-17	11	2	2017-02-10	ULL	162
27	2017-03-17	1	3	x
27	2017-03-17	2	3	2017-01-20	ULLN	141
27	2017-03-17	3	3	x
27	2017-03-17	4	3	2017-01-11	LHP	132
27	2017-03-17	5	3	2017-01-16	SF2	137
27	2017-03-17	6	3	2017-02-24	VRN5	176
27	2017-03-17	7	3	2017-01-13	VARN	134
27	2017-03-17	8	3	2016-11-03	EFS	63
27	2017-03-17	9	3	2017-01-16	EDIN	137
27	2017-03-17	10	3	x
27	2017-03-17	11	3	dead	FCAF
27	2017-03-17	1	4	2017-02-16	VAL	168
27	2017-03-17	2	4	2017-01-11	LHP	132
27	2017-03-17	3	4	2017-02-01	VRN2	153
27	2017-03-17	4	4	2017-02-24	VRN5	176
27	2017-03-17	5	4	2017-01-23	VARN	144
27	2017-03-17	6	4	x
27	2017-03-17	7	4	2017-01-27	LOV	148
27	2017-03-17	8	4	x
27	2017-03-17	9	4	x
27	2017-03-17	10	4	2017-01-16	NIL2	137
27	2017-03-17	11	4	2017-01-20	SF2	141
27	2017-03-17	1	5	2017-02-02	VIN3-1	154
27	2017-03-17	2	5	2017-03-03	VIN3	183
27	2017-03-17	3	5	x
27	2017-03-17	4	5	2016-11-09	EFS	69
27	2017-03-17	5	5	2017-01-23	NIL1	144
27	2017-03-17	6	5	x
27	2017-03-17	7	5	2017-01-25	VAR	146
27	2017-03-17	8	5	x
27	2017-03-17	9	5	2017-01-18	FLDF	139
27	2017-03-17	10	5	2017-01-09	flc2	130
27	2017-03-17	11	5	2017-01-25	FCAF	146
27	2017-03-17	1	6	2017-02-01	NDX	153
27	2017-03-17	2	6	2017-01-09	EDIN	130
27	2017-03-17	3	6	2017-01-30	BRO	151
27	2017-03-17	4	6	x
27	2017-03-17	5	6	2017-01-09	EDI	130
27	2017-03-17	6	6	2017-01-09	ULLN	130
27	2017-03-17	7	6	2017-01-05	FVEF	126
27	2017-03-17	8	6	x
27	2017-03-17	9	6	2017-02-10	ULL	162
27	2017-03-17	10	6	2017-01-09	BRON	130
27	2017-03-17	11	6	2017-01-05	COL	126
35	2017-03-17	1	1	2017-03-06	EDIN	186
35	2017-03-17	2	1	x
35	2017-03-17	3	1	2017-01-30	NIL2	151
35	2017-03-17	4	1	2017-01-30	FVEF	151
35	2017-03-17	5	1	2017-01-23	EDI	144
35	2017-03-17	6	1	2017-02-01	NIL1	153
35	2017-03-17	7	1	2017-01-27	VARN	148
35	2017-03-17	8	1	x
35	2017-03-17	9	1	2017-03-06	VRN5	186
35	2017-03-17	10	1	x
35	2017-03-17	11	1	2017-01-18	FLDF	139
35	2017-03-17	1	2	2017-01-25	ULLN	146
35	2017-03-17	2	2	2017-01-09	FCAF	130
35	2017-03-17	3	2	x
35	2017-03-17	4	2	x
35	2017-03-17	5	2	x
35	2017-03-17	6	2	2017-01-23	VAL	144
35	2017-03-17	7	2	2017-01-30	VAR	151
35	2017-03-17	8	2	2017-01-16	NDX	137
35	2017-03-17	9	2	2017-01-30	ULL	151
35	2017-03-17	10	2	2017-01-05	COL	126
35	2017-03-17	11	2	2017-01-09	LHP	130
35	2017-03-17	1	3	2017-03-03	VRN2	183
35	2017-03-17	2	3	x
35	2017-03-17	3	3	2017-02-22	VIN3	174
35	2017-03-17	4	3	2017-01-09	SF2	130
35	2017-03-17	5	3	2016-11-03	EFS	63
35	2017-03-17	6	3	2017-01-05	flc2	126
35	2017-03-17	7	3	2017-02-03	BRO	155
35	2017-03-17	8	3	2017-02-03	LOV	155
35	2017-03-17	9	3	2017-02-24	VIN3-1	176
35	2017-03-17	10	3	2017-01-09	BRON	130
35	2017-03-17	11	3	x
35	2017-03-17	1	4	2017-01-23	SF2	144
35	2017-03-17	2	4	2017-01-11	LHP	132
35	2017-03-17	3	4	2017-01-11	EDIN	132
35	2017-03-17	4	4	x
35	2017-03-17	5	4	2017-01-30	FCAF	151
35	2017-03-17	6	4	2017-01-05	COL	126
35	2017-03-17	7	4	2017-01-10	FVEF	131
35	2017-03-17	8	4	2017-02-28	VIN3-1	180
35	2017-03-17	9	4	2017-02-03	LOV	155
35	2017-03-17	10	4	x
35	2017-03-17	11	4	2017-01-27	BRO	148
35	2017-03-17	1	5	2017-01-09	EDI	130
35	2017-03-17	2	5	x
35	2017-03-17	3	5	x	VAL
35	2017-03-17	4	5	2017-01-23	NIL1	144
35	2017-03-17	5	5	2017-01-18	FLDF	139
35	2017-03-17	6	5	2017-01-13	NIL2	134
35	2017-03-17	7	5	2017-03-03	VRN5	183
35	2017-03-17	8	5	2017-01-23	ULLN	144
35	2017-03-17	9	5	x
35	2017-03-17	10	5	2016-11-07	EFS	67
35	2017-03-17	11	5	x
35	2017-03-17	1	6	2017-01-11	BRON	132
35	2017-03-17	2	6	2017-01-25	ULL	146
35	2017-03-17	3	6	x
35	2017-03-17	4	6	2017-01-09	flc2	130
35	2017-03-17	5	6	2017-03-17	VRN2	197
35	2017-03-17	6	6	2017-01-16	VARN	137
35	2017-03-17	7	6	2017-02-28	VIN3	180
35	2017-03-17	8	6	x
35	2017-03-17	9	6	x
35	2017-03-17	10	6	2017-01-25	VAR	146
35	2017-03-17	11	6	2017-01-13	NDX	134
41	2017-03-17	1	1	2017-02-16	FLDF	168
41	2017-03-17	2	1	2017-01-23	EDIN	144
41	2017-03-17	3	1	2017-01-11	NIL2	132
41	2017-03-17	4	1	2017-01-30	SF2	151
41	2017-03-17	5	1	2017-02-20	VIN3	172
41	2017-03-17	6	1	2017-01-25	BRON	146
41	2017-03-17	7	1	2017-01-23	VAL	144
41	2017-03-17	8	1	x
41	2017-03-17	9	1	2017-01-20	ULLN	141
41	2017-03-17	10	1	2017-01-09	FVEF	130
41	2017-03-17	11	1	2017-01-20	LHP	141
41	2017-03-17	1	2	2017-02-20	VAR	172
41	2017-03-17	2	2	2017-02-22	VRN5	174
41	2017-03-17	3	2	2017-02-28	VIN3-1	180
41	2017-03-17	4	2	2017-01-13	FCAF	134
41	2017-03-17	5	2	2016-11-03	EFS	63
41	2017-03-17	6	2	2017-02-03	BRO	155
41	2017-03-17	7	2	x
41	2017-03-17	8	2	x
41	2017-03-17	9	2	x
41	2017-03-17	10	2	x
41	2017-03-17	11	2	2017-01-16	NDX	137
41	2017-03-17	1	3	2017-01-11	COL	132
41	2017-03-17	2	3	x
41	2017-03-17	3	3	2017-01-13	VARN	134
41	2017-03-17	4	3	2017-01-23	NIL1	144
41	2017-03-17	5	3	2016-12-14	flc2	104
41	2017-03-17	6	3	2017-01-30	LOV	151
41	2017-03-17	7	3	2017-01-05	EDI	126
41	2017-03-17	8	3	x
41	2017-03-17	9	3	2017-02-03	ULL	155
41	2017-03-17	10	3	2017-03-10	VRN2	190
41	2017-03-17	11	3	x
41	2017-03-17	1	4	2017-02-24	FLDF	176
41	2017-03-17	2	4	2017-01-05	COL	126
41	2017-03-17	3	4	2017-02-16	BRO	168
41	2017-03-17	4	4	2017-03-06	VIN3-1	186
41	2017-03-17	5	4	x
41	2017-03-17	6	4	2016-12-21	flc2	111
41	2017-03-17	7	4	x
41	2017-03-17	8	4	2017-01-16	SF2	137
41	2017-03-17	9	4	x
41	2017-03-17	10	4	2017-01-23	ULLN	144
41	2017-03-17	11	4	2017-01-11	EDI	132
41	2017-03-17	1	5	2017-03-10	VRN5	190
41	2017-03-17	2	5	2017-02-03	LOV	155
41	2017-03-17	3	5	2017-02-10	VAR	162
41	2017-03-17	4	5	2017-01-18	LHP	139
41	2017-03-17	5	5	2017-01-23	BRON	144
41	2017-03-17	6	5	x
41	2017-03-17	7	5	2017-01-05	NIL2	126
41	2017-03-17	8	5	x
41	2017-03-17	9	5	2017-01-23	VARN	144
41	2017-03-17	10	5	2016-11-09	EFS	69
41	2017-03-17	11	5	2017-01-20	FVEF	141
41	2017-03-17	1	6	2017-02-03	EDIN	155
41	2017-03-17	2	6	x
41	2017-03-17	3	6	x
41	2017-03-17	4	6	2017-01-16	NIL1	137
41	2017-03-17	5	6	x
41	2017-03-17	6	6	2017-02-10	ULL	162
41	2017-03-17	7	6	2017-01-20	FCAF	141
41	2017-03-17	8	6	2017-01-13	NDX	134
41	2017-03-17	9	6	2017-01-30	VAL	151
41	2017-03-17	10	6	2017-03-17	VRN2	197
41	2017-03-17	11	6	2017-03-03	VIN3	183
43	2017-03-17	1	1	2017-01-05	flc2	126
43	2017-03-17	2	1	2017-02-20	VIN3	172
43	2017-03-17	3	1	2016-12-21	EDI	111
43	2017-03-17	4	1	x
43	2017-03-17	5	1	2016-11-03	EFS	63
43	2017-03-17	6	1	2017-01-05	SF2	126
43	2017-03-17	7	1	2017-01-09	ULLN	130
43	2017-03-17	8	1	2017-01-09	FLDF	130
43	2017-03-17	9	1	2017-01-30	NIL1	151
43	2017-03-17	10	1	2017-01-05	LHP	126
43	2017-03-17	11	1	x
43	2017-03-17	1	2	2017-01-27	NDX	148
43	2017-03-17	2	2	2017-02-20	VIN3-1	172
43	2017-03-17	3	2	x
43	2017-03-17	4	2	2017-01-23	BRON	144
43	2017-03-17	5	2	2016-12-21	COL	111
43	2017-03-17	6	2	x
43	2017-03-17	7	2	2017-01-09	NIL2	130
43	2017-03-17	8	2	x
43	2017-03-17	9	2	2017-01-18	VARN	139
43	2017-03-17	10	2	2017-02-01	ULL	153
43	2017-03-17	11	2	2017-01-30	BRO	151
43	2017-03-17	1	3	x
43	2017-03-17	2	3	2017-02-28	VRN2	180
43	2017-03-17	3	3	2017-01-23	FVEF	144
43	2017-03-17	4	3	2017-01-30	LOV	151
43	2017-03-17	5	3	2017-02-20	VRN5	172
43	2017-03-17	6	3	x
43	2017-03-17	7	3	2017-01-23	VAL	144
43	2017-03-17	8	3	x
43	2017-03-17	9	3	2017-01-09	EDIN	130
43	2017-03-17	10	3	2017-01-09	FCAF	130
43	2017-03-17	11	3	2017-01-27	VAR	148
43	2017-03-17	1	4	2016-12-21	flc2	111
43	2017-03-17	2	4	2017-02-01	ULL	153
43	2017-03-17	3	4	2017-02-18	FLDF	170
43	2017-03-17	4	4	2017-01-16	NIL2	137
43	2017-03-17	5	4	2017-01-11	NDX	132
43	2017-03-17	6	4	x
43	2017-03-17	7	4	2017-01-16	EDIN	137
43	2017-03-17	8	4	2017-02-10	BRO	162
43	2017-03-17	9	4	x
43	2017-03-17	10	4	2017-02-22	VIN3	174
43	2017-03-17	11	4	2016-12-21	COL	111
43	2017-03-17	1	5	2017-03-03	VRN2	183
43	2017-03-17	2	5	dead	VIN3-1
43	2017-03-17	3	5	2017-01-11	BRON	132
43	2017-03-17	4	5	2017-01-23	FVEF	144
43	2017-03-17	5	5	2017-01-20	NIL1	141
43	2017-03-17	6	5	x
43	2017-03-17	7	5	2017-01-05	ULLN	126
43	2017-03-17	8	5	2017-01-05	LHP	126
43	2017-03-17	9	5	x
43	2017-03-17	10	5	2017-01-13	SF2	134
43	2017-03-17	11	5	x
43	2017-03-17	1	6	2017-01-11	FCAF	132
43	2017-03-17	2	6	2017-01-23	VARN	144
43	2017-03-17	3	6	x
43	2017-03-17	4	6	2017-01-05	EDI	126
43	2017-03-17	5	6	2016-11-03	EFS	63
43	2017-03-17	6	6	2017-02-28	VRN5	180
43	2017-03-17	7	6	2017-01-25	LOV	146
43	2017-03-17	8	6	x
43	2017-03-17	9	6	2017-01-25	VAR	146
43	2017-03-17	10	6	x
43	2017-03-17	11	6	2017-01-27	VAL	148
44	2017-03-17	1	1	2017-02-10	VIN3	162
44	2017-03-17	2	1	dead	VRN2
44	2017-03-17	3	1	x
44	2017-03-17	4	1	2016-11-03	EFS	63
44	2017-03-17	5	1	2017-01-20	NIL1	141
44	2017-03-17	6	1	2017-01-30	BRO	151
44	2017-03-17	7	1	2017-02-20	VRN5	172
44	2017-03-17	8	1	2017-01-16	VARN	137
44	2017-03-17	9	1	2017-01-23	FLDF	144
44	2017-03-17	10	1	2017-01-23	VAL	144
44	2017-03-17	11	1	2017-01-05	COL	126
44	2017-03-17	1	2	2017-01-05	flc2	126
44	2017-03-17	2	2	x
44	2017-03-17	3	2	2017-01-05	SF2	126
44	2017-03-17	4	2	2017-01-27	VAR	148
44	2017-03-17	5	2	x
44	2017-03-17	6	2	2017-01-23	ULL	144
44	2017-03-17	7	2	x
44	2017-03-17	8	2	2017-01-26	LOV	147
44	2017-03-17	9	2	2017-01-13	EDIN	134
44	2017-03-17	10	2	2017-01-11	ULLN	132
44	2017-03-17	11	2	x
44	2017-03-17	1	3	2017-01-16	FVEF	137
44	2017-03-17	2	3	2017-01-11	BRON	132
44	2017-03-17	3	3	x
44	2017-03-17	4	3	2017-02-20	VIN3-1	172
44	2017-03-17	5	3	2017-01-11	FCAF	132
44	2017-03-17	6	3	2017-01-09	NDX	130
44	2017-03-17	7	3	x
44	2017-03-17	8	3	2017-01-09	LHP	130
44	2017-03-17	9	3	x
44	2017-03-17	10	3	2017-01-13	NIL2	134
44	2017-03-17	11	3	2016-12-21	EDI	111
44	2017-03-17	1	4	x
44	2017-03-17	2	4	2017-01-30	BRON	151
44	2017-03-17	3	4	2016-12-21	COL	111
44	2017-03-17	4	4	2017-01-05	EDI	126
44	2017-03-17	5	4	x
44	2017-03-17	6	4	2017-01-30	LOV	151
44	2017-03-17	7	4	2017-01-27	BRO	148
44	2017-03-17	8	4	2017-01-11	ULLN	132
44	2017-03-17	9	4	2017-02-10	NDX	162
44	2017-03-17	10	4	2017-02-22	VRN5	174
44	2017-03-17	11	4	2017-01-25	VAL	146
44	2017-03-17	1	5	x
44	2017-03-17	2	5	x
44	2017-03-17	3	5	2016-11-01	EFS	61
44	2017-03-17	4	5	2017-02-22	VRN2	174
44	2017-03-17	5	5	2017-01-23	ULL	144
44	2017-03-17	6	5	2017-01-09	NIL2	130
44	2017-03-17	7	5	2017-02-22	VIN3-1	174
44	2017-03-17	8	5	2017-01-25	VAR	146
44	2017-03-17	9	5	x
44	2017-03-17	10	5	x
44	2017-03-17	11	5	2017-01-05	EDIN	126
44	2017-03-17	1	6	2017-02-28	VIN3	180
44	2017-03-17	2	6	2017-01-05	FCAF	126
44	2017-03-17	3	6	x
44	2017-03-17	4	6	x
44	2017-03-17	5	6	2017-01-16	VARN	137
44	2017-03-17	6	6	2017-01-09	LHP	130
44	2017-03-17	7	6	2017-01-05	flc2	126
44	2017-03-17	8	6	2017-01-25	NIL1	146
44	2017-03-17	9	6	2017-01-18	FLDF	139
44	2017-03-17	10	6	2017-01-20	FVEF	141
44	2017-03-17	11	6	dead	SF2
45	2017-03-17	1	1	x
45	2017-03-17	2	1	x
45	2017-03-17	3	1	2017-02-28	VRN2	180
45	2017-03-17	4	1	2016-11-03	EFS	63
45	2017-03-17	5	1	2017-01-16	NIL2	137
45	2017-03-17	6	1	2017-01-25	VAR	146
45	2017-03-17	7	1	2017-02-28	VRN5	180
45	2017-03-17	8	1	2017-01-16	BRON	137
45	2017-03-17	9	1	2017-03-06	VIN3	186
45	2017-03-17	10	1	2017-01-05	LHP	126
45	2017-03-17	11	1	2017-01-23	ULL	144
45	2017-03-17	1	2	2017-01-16	ULLN	137
45	2017-03-17	2	2	2017-01-05	flc2	126
45	2017-03-17	3	2	x
45	2017-03-17	4	2	x
45	2017-03-17	5	2	2017-01-25	FCAF	146
45	2017-03-17	6	2	x
45	2017-03-17	7	2	2017-01-13	FLDF	134
45	2017-03-17	8	2	2017-02-01	NDX	153
45	2017-03-17	9	2	2017-01-30	LOV	151
45	2017-03-17	10	2	2017-01-05	EDI	126
45	2017-03-17	11	2	2017-01-13	FVEF	134
45	2017-03-17	1	3	2017-01-25	NIL1	146
45	2017-03-17	2	3	2017-02-10	BRO	162
45	2017-03-17	3	3	x
45	2017-03-17	4	3	2016-12-14	COL	104
45	2017-03-17	5	3	2017-01-11	EDIN	132
45	2017-03-17	6	3	2017-01-09	SF2	130
45	2017-03-17	7	3	2017-02-22	VIN3-1	174
45	2017-03-17	8	3	2017-01-25	VAL	146
45	2017-03-17	9	3	x
45	2017-03-17	10	3	2017-01-20	VARN	141
45	2017-03-17	11	3	x
45	2017-03-17	1	4	x
45	2017-03-17	2	4	2017-01-23	FVEF	144
45	2017-03-17	3	4	2017-01-11	ULLN	132
45	2017-03-17	4	4	2017-01-30	VIN3-1	151
45	2017-03-17	5	4	x
45	2017-03-17	6	4	2017-02-22	VRN5	174
45	2017-03-17	7	4	x
45	2017-03-17	8	4	2017-01-20	VARN	141
45	2017-03-17	9	4	x
45	2017-03-17	10	4	2017-01-30	LOV	151
45	2017-03-17	11	4	2017-01-05	EDI	126
45	2017-03-17	1	5	2017-01-16	BRON	137
45	2017-03-17	2	5	2017-03-03	VRN2	183
45	2017-03-17	3	5	2017-01-30	LHP	151
45	2017-03-17	4	5	2017-01-27	VAR	148
45	2017-03-17	5	5	2017-01-09	flc2	130
45	2017-03-17	6	5	2017-01-13	FCAF	134
45	2017-03-17	7	5	x
45	2017-03-17	8	5	2017-01-16	NIL2	137
45	2017-03-17	9	5	2017-02-03	BRO	155
45	2017-03-17	10	5	2017-02-28	VIN3	180
45	2017-03-17	11	5	x
45	2017-03-17	1	6	2017-01-25	ULL	146
45	2017-03-17	2	6	2017-01-27	VAL	148
45	2017-03-17	3	6	2017-01-09	EDIN	130
45	2017-03-17	4	6	2017-01-05	SF2	126
45	2017-03-17	5	6	x
45	2017-03-17	6	6	2017-01-20	NIL1	141
45	2017-03-17	7	6	2017-01-27	NDX	148
45	2017-03-17	8	6	2017-01-16	FLDF	137
45	2017-03-17	9	6	x
45	2017-03-17	10	6	2016-11-03	EFS	63
45	2017-03-17	11	6	2016-12-14	COL	104
46	2017-03-17	1	1	2017-01-11	FCAF	132
46	2017-03-17	2	1	2017-01-16	ULLN	137
46	2017-03-17	3	1	x
46	2017-03-17	4	1	2017-02-20	VIN3	172
46	2017-03-17	5	1	2016-12-14	COL	104
46	2017-03-17	6	1	2017-01-23	BRON	144
46	2017-03-17	7	1	x
46	2017-03-17	8	1	2017-01-25	VAR	146
46	2017-03-17	9	1	2017-01-13	NIL2	134
46	2017-03-17	10	1	x
46	2017-03-17	11	1	2017-01-11	EDIN	132
46	2017-03-17	1	2	2017-03-03	VRN2	183
46	2017-03-17	2	2	2017-02-14	VIN3-1	166
46	2017-03-17	3	2	2017-01-23	VARN	144
46	2017-03-17	4	2	2017-01-23	ULL	144
46	2017-03-17	5	2	x
46	2017-03-17	6	2	2017-01-30	BRO	151
46	2017-03-17	7	2	2017-01-13	SF2	134
46	2017-03-17	8	2	x
46	2017-03-17	9	2	2017-02-01	NDX	153
46	2017-03-17	10	2	2017-01-27	LOV	148
46	2017-03-17	11	2	2017-02-28	VRN5	180
46	2017-03-17	1	3	2016-11-09	EFS	69
46	2017-03-17	2	3	2017-01-20	VAL	141
46	2017-03-17	3	3	2017-01-05	flc2	126
46	2017-03-17	4	3	2017-01-16	FLDF	137
46	2017-03-17	5	3	x
46	2017-03-17	6	3	x
46	2017-03-17	7	3	2017-01-13	FVEF	134
46	2017-03-17	8	3	2017-01-05	LHP	126
46	2017-03-17	9	3	x
46	2017-03-17	10	3	2017-01-05	EDI	126
46	2017-03-17	11	3	2017-01-18	NIL1	139
46	2017-03-17	1	4	2016-11-09	EFS	69
46	2017-03-17	2	4	2017-01-27	NDX	148
46	2017-03-17	3	4	2017-01-23	NIL1	144
46	2017-03-17	4	4	2017-01-05	EDI	126
46	2017-03-17	5	4	2016-12-21	flc2	111
46	2017-03-17	6	4	2017-01-13	EDIN	134
46	2017-03-17	7	4	x
46	2017-03-17	8	4	2017-01-16	NIL2	137
46	2017-03-17	9	4	2017-01-09	ULLN	130
46	2017-03-17	10	4	x
46	2017-03-17	11	4	2017-02-20	VIN3	172
46	2017-03-17	1	5	2017-01-13	VAL	134
46	2017-03-17	2	5	2017-01-30	LOV	151
46	2017-03-17	3	5	x
46	2017-03-17	4	5	2017-01-13	SF2	134
46	2017-03-17	5	5	2017-01-23	FLDF	144
46	2017-03-17	6	5	2017-01-20	VARN	141
46	2017-03-17	7	5	2017-01-16	FCAF	137
46	2017-03-17	8	5	2017-01-23	ULL	144
46	2017-03-17	9	5	2017-02-20	VIN3-1	172
46	2017-03-17	10	5	2017-01-09	LHP	130
46	2017-03-17	11	5	2016-12-14	COL	104
46	2017-03-17	1	6	2017-01-30	BRO	151
46	2017-03-17	2	6	2017-02-20	VRN5	172
46	2017-03-17	3	6	2017-01-23	FVEF	144
46	2017-03-17	4	6	2017-01-23	BRON	144
46	2017-03-17	5	6	x
46	2017-03-17	6	6	x
46	2017-03-17	7	6	x
46	2017-03-17	8	6	x
46	2017-03-17	9	6	2017-01-27	VAR	148
46	2017-03-17	10	6	2017-03-06	VRN2	186
46	2017-03-17	11	6	x
47	2017-03-17	1	1	2017-01-16	NDX	137
47	2017-03-17	2	1	2017-03-06	VRN2	186
47	2017-03-17	3	1	2017-01-16	FLDF	137
47	2017-03-17	4	1	2017-01-25	ULL	146
47	2017-03-17	5	1	2017-01-16	ULLN	137
47	2017-03-17	6	1	2017-01-13	VARN	134
47	2017-03-17	7	1	2017-02-01	BRO	153
47	2017-03-17	8	1	x
47	2017-03-17	9	1	x
47	2017-03-17	10	1	x
47	2017-03-17	11	1	x
47	2017-03-17	1	2	2017-02-28	VIN3	180
47	2017-03-17	2	2	2017-01-09	LHP	130
47	2017-03-17	3	2	x
47	2017-03-17	4	2	2017-02-03	VAL	155
47	2017-03-17	5	2	2016-12-21	EDI	111
47	2017-03-17	6	2	2017-01-05	EDIN	126
47	2017-03-17	7	2	x
47	2017-03-17	8	2	2017-02-22	VIN3-1	174
47	2017-03-17	9	2	2016-12-14	flc2	104
47	2017-03-17	10	2	2017-01-23	LOV	144
47	2017-03-17	11	2	x
47	2017-03-17	1	3	2017-02-28	VRN5	180
47	2017-03-17	2	3	2017-01-20	FCAF	141
47	2017-03-17	3	3	2016-11-09	EFS	69
47	2017-03-17	4	3	x
47	2017-03-17	5	3	2017-01-11	NIL1	132
47	2017-03-17	6	3	2017-01-16	FVEF	137
47	2017-03-17	7	3	2017-01-16	BRON	137
47	2017-03-17	8	3	2017-01-13	SF2	134
47	2017-03-17	9	3	2017-01-27	VAR	148
47	2017-03-17	10	3	2017-01-13	NIL2	134
47	2017-03-17	11	3	2016-12-14	COL	104
47	2017-03-17	1	4	2017-01-30	ULL	151
47	2017-03-17	2	4	2017-01-25	FVEF	146
47	2017-03-17	3	4	2017-01-23	SF2	144
47	2017-03-17	4	4	2017-02-01	VIN3	153
47	2017-03-17	5	4	x
47	2017-03-17	6	4	x
47	2017-03-17	7	4	2017-01-16	NDX	137
47	2017-03-17	8	4	2016-11-03	EFS	63
47	2017-03-17	9	4	2016-12-14	COL	104
47	2017-03-17	10	4	2017-01-11	NIL2	132
47	2017-03-17	11	4	2017-01-16	NIL1	137
47	2017-03-17	1	5	2017-01-16	EDI	137
47	2017-03-17	2	5	2017-01-20	FLDF	141
47	2017-03-17	3	5	2017-01-20	BRON	141
47	2017-03-17	4	5	2017-01-30	BRO	151
47	2017-03-17	5	5	2017-01-13	ULLN	134
47	2017-03-17	6	5	2017-01-16	VARN	137
47	2017-03-17	7	5	2017-01-27	LOV	148
47	2017-03-17	8	5	x
47	2017-03-17	9	5	2017-01-05	FCAF	126
47	2017-03-17	10	5	2017-03-06	VRN5	186
47	2017-03-17	11	5	x
47	2017-03-17	1	6	2017-02-28	VRN2	180
47	2017-03-17	2	6	x
47	2017-03-17	3	6	2017-01-25	VAL	146
47	2017-03-17	4	6	x
47	2017-03-17	5	6	2017-01-11	EDIN	132
47	2017-03-17	6	6	2017-01-09	LHP	130
47	2017-03-17	7	6	x
47	2017-03-17	8	6	2016-12-14	flc2	104
47	2017-03-17	9	6	x
47	2017-03-17	10	6	2017-02-22	VIN3-1	174
47	2017-03-17	11	6	2017-01-27	VAR	148
48	2017-03-17	1	1	x
48	2017-03-17	2	1	2016-12-14	flc2	104
48	2017-03-17	3	1	2017-02-16	VIN3	168
48	2017-03-17	4	1	x
48	2017-03-17	5	1	2017-01-11	VARN	132
48	2017-03-17	6	1	x
48	2017-03-17	7	1	2017-01-16	NIL2	137
48	2017-03-17	8	1	2016-11-09	EFS	69
48	2017-03-17	9	1	2017-01-23	ULL	144
48	2017-03-17	10	1	x
48	2017-03-17	11	1	2017-01-16	FLDF	137
48	2017-03-17	1	2	2017-01-23	NIL1	144
48	2017-03-17	2	2	2017-01-16	FCAF	137
48	2017-03-17	3	2	2017-01-18	FVEF	139
48	2017-03-17	4	2	x
48	2017-03-17	5	2	x
48	2017-03-17	6	2	2017-01-16	ULLN	137
48	2017-03-17	7	2	2017-02-20	VIN3-1	172
48	2017-03-17	8	2	x
48	2017-03-17	9	2	2017-01-30	VAL	151
48	2017-03-17	10	2	2016-12-07	COL	97
48	2017-03-17	11	2	2017-01-16	NDX	137
48	2017-03-17	1	3	2017-03-06	VRN2	186
48	2017-03-17	2	3	x
48	2017-03-17	3	3	2017-02-28	VRN5	180
48	2017-03-17	4	3	2017-01-09	LHP	130
48	2017-03-17	5	3	2017-01-27	BRO	148
48	2017-03-17	6	3	2017-01-27	VAR	148
48	2017-03-17	7	3	2017-01-03	LOV	124
48	2017-03-17	8	3	2017-01-11	EDIN	132
48	2017-03-17	9	3	2017-01-18	BRON	139
48	2017-03-17	10	3	2017-01-16	SF2	137
48	2017-03-17	11	3	2017-01-05	EDI	126
48	2017-03-17	1	4	2017-01-27	VAR	148
48	2017-03-17	2	4	2017-01-11	FCAF	132
48	2017-03-17	3	4	2017-01-18	FVEF	139
48	2017-03-17	4	4	2017-01-25	NIL1	146
48	2017-03-17	5	4	2016-12-14	COL	104
48	2017-03-17	6	4	2017-01-30	BRO	151
48	2017-03-17	7	4	2017-01-05	EDI	126
48	2017-03-17	8	4	2016-11-03	EFS	63
48	2017-03-17	9	4	x
48	2017-03-17	10	4	2017-01-11	NDX	132
48	2017-03-17	11	4	x
48	2017-03-17	1	5	2017-01-11	NIL2	132
48	2017-03-17	2	5	x
48	2017-03-17	3	5	2017-01-16	VARN	137
48	2017-03-17	4	5	2017-01-09	LHP	130
48	2017-03-17	5	5	2017-02-01	VAL	153
48	2017-03-17	6	5	x
48	2017-03-17	7	5	2017-01-05	ULLN	126
48	2017-03-17	8	5	x
48	2017-03-17	9	5	2017-02-16	VRN5	168
48	2017-03-17	10	5	x
48	2017-03-17	11	5	2017-01-13	SF2	134
48	2017-03-17	1	6	2017-02-22	VIN3	174
48	2017-03-17	2	6	2017-01-23	FLDF	144
48	2017-03-17	3	6	2017-02-28	VIN3-1	180
48	2017-03-17	4	6	2017-01-23	ULL	144
48	2017-03-17	5	6	x
48	2017-03-17	6	6	x
48	2017-03-17	7	6	2017-01-25	BRON	146
48	2017-03-17	8	6	2016-12-14	flc2	104
48	2017-03-17	9	6	2017-01-11	EDIN	132
48	2017-03-17	10	6	2017-01-27	LOV	148
48	2017-03-17	11	6	2017-02-28	VRN2	180
