# Supplementary material for: Natural variation in autumn expression is the major adaptive determinant distinguishing Arabidopsis FLC haplotypes
Source: eLife. 2020 Sep 9;9:e57671. doi: 10.7554/eLife.57671 (PMC7518893; doi:10.7554/eLife.57671)
Supplement: Source data 7. [file elife-57671-data7.xlsx]

## Sheet: Experiment 1 (Fig. S1-1A, B)
Tray	Treat	Name	Accession	Treatment	Buds Visible	Cauline branches	Rosette branches	Total branches	Empty nodes	Total cauline nodes	RSB	Total nodes	Notes	Start of experiment	Days to bud after vern	Rosette branching (no dnf)	Total branches (no dnf)
1	20	Col FRI NV	Col FRI	NV	2015-03-29	9	0	9	0	9	1	9		2015-02-09	48	0	9
3	20	Col FRI NV	Col FRI	NV	2015-03-18	13	0	13	0	13	1	13		2015-02-09	37	0	13
5	20	Col FRI NV	Col FRI	NV	2015-03-18	8	2	10	1	9	0.888889	11		2015-02-09	37	2	10
7	20	Col FRI NV	Col FRI	NV	2015-03-09	9	1	10	0	9	1	10		2015-02-09	28	1	10
7	20	Col FRI NV	Col FRI	NV	2015-03-23	13	0	13	0	13	1	13		2015-02-09	42	0	13
10	20	Col FRI NV	Col FRI	NV	2015-03-15	11	0	11	0	11	1	11		2015-02-09	34	0	11
12	20	Col FRI NV	Col FRI	NV	2015-03-16	12	4	16	0	12	1	16		2015-02-09	35	4	16
14	20	Col FRI NV	Col FRI	NV	2015-03-10	12	0	12	0	12	1	12		2015-02-09	29	0	12
15	20	Col FRI NV	Col FRI	NV	2015-03-11	7	0	7	0	7	1	7		2015-02-09	30	0	7
1	19	Col FRI 2WV	Col FRI	02W	2015-03-11	12	1	13	0	12	1	13		2015-02-09	30	1	13
3	19	Col FRI 2WV	Col FRI	02W	2015-03-09	11	0	11	0	11	1	11		2015-02-09	28	0	11
5	19	Col FRI 2WV	Col FRI	02W	2015-03-09	8	2	10	0	8	1	10		2015-02-09	28	2	10
6	19	Col FRI 2WV	Col FRI	02W	2015-03-11	7	4	11	1	8	0.875	12		2015-02-09	30	4	11
8	19	Col FRI 2WV	Col FRI	02W	2015-03-09	8	2	10	0	8	1	10		2015-02-09	28	2	10
10	19	Col FRI 2WV	Col FRI	02W	2015-03-05	9	1	10	0	9	1	10		2015-02-09	24	1	10
11	19	Col FRI 2WV	Col FRI	02W	2015-03-03	7	1	8	0	7	1	8		2015-02-09	22	1	8
14	19	Col FRI 2WV	Col FRI	02W	2015-03-09	9	1	10	1	10	0.9	11		2015-02-09	28	1	10
14	19	Col FRI 2WV	Col FRI	02W	2015-03-09	9	2	11	0	9	1	11		2015-02-09	28	2	11
1	18	Col FRI 4WV	Col FRI	04W	2015-03-02	8	9	17	0	8	1	17		2015-02-09	21	9	17
4	18	Col FRI 4WV	Col FRI	04W	2015-03-02	7	5	12	0	7	1	12		2015-02-09	21	5	12
5	18	Col FRI 4WV	Col FRI	04W	2015-02-27	6	4	10	0	6	1	10		2015-02-09	18	4	10
6	18	Col FRI 4WV	Col FRI	04W	2015-03-02	8	6	14	0	8	1	14		2015-02-09	21	6	14
9	18	Col FRI 4WV	Col FRI	04W	2015-03-02	7	6	13	0	7	1	13		2015-02-09	21	6	13
9	18	Col FRI 4WV	Col FRI	04W	2015-03-01	7	4	11	0	7	1	11		2015-02-09	20	4	11
12	18	Col FRI 4WV	Col FRI	04W	2015-02-27	8	7	15	0	8	1	15		2015-02-09	18	7	15
13	18	Col FRI 4WV	Col FRI	04W	2015-03-02	7	4	11	0	7	1	11		2015-02-09	21	4	11
14	18	Col FRI 4WV	Col FRI	04W	2015-03-04	6	5	11	0	6	1	11		2015-02-09	23	5	11
2	17	Col FRI 8WV	Col FRI	08W	2015-02-22	4	10	14	0	4	1	14		2015-02-09	13	10	14
4	17	Col FRI 8WV	Col FRI	08W	2015-02-24	4	9	13	1	5	0.8	14		2015-02-09	15	9	13
5	17	Col FRI 8WV	Col FRI	08W	2015-02-22	4	6	10	0	4	1	10	broken stem	2015-02-09	13	6	10
6	17	Col FRI 8WV	Col FRI	08W	2015-02-23	5	8	13	0	5	1	13		2015-02-09	14	8	13
8	17	Col FRI 8WV	Col FRI	08W	2015-02-23	3	9	12	0	3	1	12		2015-02-09	14	9	12
10	17	Col FRI 8WV	Col FRI	08W	2015-02-23	3	9	12	0	3	1	12		2015-02-09	14	9	12
11	17	Col FRI 8WV	Col FRI	08W	2015-02-23	6	4	10	0	6	1	10		2015-02-09	14	4	10
13	17	Col FRI 8WV	Col FRI	08W										2015-02-09
15	17	Col FRI 8WV	Col FRI	08W	2015-02-24	5	10	15	0	5	1	15		2015-02-09	15	10	15
1	16	Col FRI 12WV	Col FRI	12W	2015-02-20	7	10	17	0	7	1	17		2015-02-09	11	10	17
3	16	Col FRI 12WV	Col FRI	12W	2015-02-19	7	9	16	0	7	1	16		2015-02-09	10	9	16
4	16	Col FRI 12WV	Col FRI	12W	2015-02-19	7	11	18	0	7	1	18		2015-02-09	10	11	18
6	16	Col FRI 12WV	Col FRI	12W	2015-02-19	7	9	16	0	7	1	16		2015-02-09	10	9	16
8	16	Col FRI 12WV	Col FRI	12W	2015-02-19	7	8	15	0	7	1	15		2015-02-09	10	8	15
10	16	Col FRI 12WV	Col FRI	12W	2015-02-19	5	7	12	0	5	1	12		2015-02-09	10	7	12
11	16	Col FRI 12WV	Col FRI	12W	2015-02-19	6	7	13	0	6	1	13		2015-02-09	10	7	13
13	16	Col FRI 12WV	Col FRI	12W	2015-02-19	8	9	17	0	8	1	17		2015-02-09	10	9	17
15	16	Col FRI 12WV	Col FRI	12W										2015-02-09
1	15	Bro1-6 NV	Bro1-6	NV	2015-04-26			0	0	0	#DIV/0!	0		2015-02-09	76		0
2	15	Bro1-6 NV	Bro1-6	NV	2015-04-26	3	6	9	0	3	1	9		2015-02-09	76	6	9
5	15	Bro1-6 NV	Bro1-6	NV	2015-04-26			0	0	0	#DIV/0!	0	more than 10 stems, hard to tell which was main stem	2015-02-09	76		0
6	15	Bro1-6 NV	Bro1-6	NV	2015-05-22	0	1	1	0	0	#DIV/0!	1		2015-02-09	102	1	1
9	15	Bro1-6 NV	Bro1-6	NV	2015-05-01	1	7	8	0	1	1	8		2015-02-09	81	7	8
9	15	Bro1-6 NV	Bro1-6	NV	2015-05-10	6	5	11	0	6	1	11		2015-02-09	90	5	11
11	15	Bro1-6 NV	Bro1-6	NV	2015-05-05			0	0	0	#DIV/0!	0		2015-02-09	85		0
13	15	Bro1-6 NV	Bro1-6	NV	2015-05-05	2	9	11	0	2	1	11		2015-02-09	85	9	11
15	15	Bro1-6 NV	Bro1-6	NV	2015-05-05	11	6	17	0	11	1	17		2015-02-09	85	6	17
2	14	Bro1-6 2WV	Bro1-6	02W	2015-03-30	7	1	8	2	9	0.777778	10		2015-02-09	49	1	8
4	14	Bro1-6 2WV	Bro1-6	02W	2015-04-06	10	4	14	0	10	1	14		2015-02-09	56	4	14
5	14	Bro1-6 2WV	Bro1-6	02W	2015-04-07	7	7	14	0	7	1	14		2015-02-09	57	7	14
6	14	Bro1-6 2WV	Bro1-6	02W	2015-04-01	10	1	11	0	10	1	11		2015-02-09	51	1	11
8	14	Bro1-6 2WV	Bro1-6	02W	2015-04-04	9	3	12	0	9	1	12		2015-02-09	54	3	12
10	14	Bro1-6 2WV	Bro1-6	02W				0	0	0	#DIV/0!	0	no main stem, 12 CLB?	2015-02-09			0
12	14	Bro1-6 2WV	Bro1-6	02W	2015-04-14			0	0	0	#DIV/0!	0	no main stem, more than 10 stems	2015-02-09	64		0
13	14	Bro1-6 2WV	Bro1-6	02W	2015-04-07	3	3	6	6	9	0.333333	12		2015-02-09	57	3	6
14	14	Bro1-6 2WV	Bro1-6	02W	2015-03-06			0	0	0	#DIV/0!	0	dead plant	2015-02-09	25		0
1	13	Bro1-6 4WV	Bro1-6	04W	2015-03-17	9	2	11	0	9	1	11		2015-02-09	36	2	11
2	13	Bro1-6 4WV	Bro1-6	04W	2015-03-16	8	6	14	0	8	1	14		2015-02-09	35	6	14
4	13	Bro1-6 4WV	Bro1-6	04W	2015-03-16	7	4	11	4	11	0.636364	15		2015-02-09	35	4	11
6	13	Bro1-6 4WV	Bro1-6	04W	2015-03-14	11	3	14	1	12	0.916667	15		2015-02-09	33	3	14
7	13	Bro1-6 4WV	Bro1-6	04W	2015-03-18	9	4	13	0	9	1	13		2015-02-09	37	4	13
9	13	Bro1-6 4WV	Bro1-6	04W	2015-03-26	9	5	14	0	9	1	14		2015-02-09	45	5	14
11	13	Bro1-6 4WV	Bro1-6	04W	2015-03-23			0	0	0	#DIV/0!	0		2015-02-09	42		0
12	13	Bro1-6 4WV	Bro1-6	04W	2015-03-19	10	3	13	0	10	1	13		2015-02-09	38	3	13
14	13	Bro1-6 4WV	Bro1-6	04W	2015-03-16	10	4	14	0	10	1	14		2015-02-09	35	4	14
1	12	Bro1-6 8WV	Bro1-6	08W	2015-03-01	4	7	11	0	4	1	11		2015-02-09	20	7	11
3	12	Bro1-6 8WV	Bro1-6	08W	2015-02-27	4	5	9	0	4	1	9		2015-02-09	18	5	9
4	12	Bro1-6 8WV	Bro1-6	08W	2015-03-02	6	6	12	0	6	1	12		2015-02-09	21	6	12
7	12	Bro1-6 8WV	Bro1-6	08W	2015-02-26	5	7	12	0	5	1	12		2015-02-09	17	7	12
8	12	Bro1-6 8WV	Bro1-6	08W	2015-02-26	6	7	13	0	6	1	13		2015-02-09	17	7	13
9	12	Bro1-6 8WV	Bro1-6	08W	2015-02-19	4	11	15	0	4	1	15		2015-02-09	10	11	15
12	12	Bro1-6 8WV	Bro1-6	08W	2015-02-26	5	8	13	0	5	1	13		2015-02-09	17	8	13
13	12	Bro1-6 8WV	Bro1-6	08W	2015-02-27	5	6	11	0	5	1	11		2015-02-09	18	6	11
15	12	Bro1-6 8WV	Bro1-6	08W	2015-02-25	3	7	10	0	3	1	10		2015-02-09	16	7	10
2	11	Bro1-6 12WV	Bro1-6	12W	2015-02-22	5	11	16	0	5	1	16		2015-02-09	13	11	16
3	11	Bro1-6 12WV	Bro1-6	12W	2015-02-22	4	10	14	0	4	1	14		2015-02-09	13	10	14
4	11	Bro1-6 12WV	Bro1-6	12W	2015-02-22	3		3	0	3	1	3		2015-02-09	13		3
7	11	Bro1-6 12WV	Bro1-6	12W	2015-02-20		10	10	0	0	#DIV/0!	10		2015-02-09	11	10	10
8	11	Bro1-6 12WV	Bro1-6	12W	2015-02-22	3	18	21	0	3	1	21		2015-02-09	13	18	21
9	11	Bro1-6 12WV	Bro1-6	12W	2015-02-23	5	12	17	0	5	1	17	2 double branches =7CLB?	2015-02-09	14	12	17
12	11	Bro1-6 12WV	Bro1-6	12W	2015-02-22	5	10	15	0	5	1	15		2015-02-09	13	10	15
13	11	Bro1-6 12WV	Bro1-6	12W	2015-02-22	5	12	17	0	5	1	17		2015-02-09	13	12	17
14	11	Bro1-6 12WV	Bro1-6	12W	2015-02-20	6	12	18	0	6	1	18		2015-02-09	11	12	18
2	25	Edi-0 NV	Edi-0	NV	2015-03-18	13	0	13	1	14	0.928571	14		2015-02-09	37	0	13
3	25	Edi-0 NV	Edi-0	NV	2015-03-15	10	0	10	0	10	1	10		2015-02-09	34	0	10
4	25	Edi-0 NV	Edi-0	NV	2015-03-18	8	0	8	0	8	1	8		2015-02-09	37	0	8
7	25	Edi-0 NV	Edi-0	NV	2015-03-17	11	0	11	0	11	1	11		2015-02-09	36	0	11
8	25	Edi-0 NV	Edi-0	NV	2015-03-22	13	0	13	0	13	1	13		2015-02-09	41	0	13
9	25	Edi-0 NV	Edi-0	NV	2015-03-19	13	0	13	0	13	1	13		2015-02-09	38	0	13
12	25	Edi-0 NV	Edi-0	NV	2015-03-22	13	0	13	1	14	0.928571	14		2015-02-09	41	0	13
13	25	Edi-0 NV	Edi-0	NV	2015-03-24	13	0	13	0	13	1	13		2015-02-09	43	0	13
14	25	Edi-0 NV	Edi-0	NV	2015-03-21	4	0	4	9	13	0.307692	13		2015-02-09	40	0	4
1	24	Edi-0 2WV	Edi-0	02W	2015-03-15	13	2	15	0	13	1	15		2015-02-09	34	2	15
4	24	Edi-0 2WV	Edi-0	02W	2015-03-14	11	0	11	1	12	0.916667	12		2015-02-09	33	0	11
5	24	Edi-0 2WV	Edi-0	02W	2015-03-13	12	0	12	0	12	1	12		2015-02-09	32	0	12
7	24	Edi-0 2WV	Edi-0	02W	2015-03-14	11	1	12	0	11	1	12		2015-02-09	33	1	12
8	24	Edi-0 2WV	Edi-0	02W	2015-03-16	10	0	10	0	10	1	10		2015-02-09	35	0	10
10	24	Edi-0 2WV	Edi-0	02W	2015-03-16	9	0	9	0	9	1	9		2015-02-09	35	0	9
11	24	Edi-0 2WV	Edi-0	02W	2015-03-16	11	0	11	0	11	1	11		2015-02-09	35	0	11
14	24	Edi-0 2WV	Edi-0	02W	2015-03-10	10	0	10	1	11	0.909091	11		2015-02-09	29	0	10
14	24	Edi-0 2WV	Edi-0	02W	2015-03-11	7	0	7	4	11	0.636364	11		2015-02-09	30	0	7
2	23	Edi-0 4WV	Edi-0	04W	2015-03-04	9	0	9	0	9	1	9		2015-02-09	23	0	9
3	23	Edi-0 4WV	Edi-0	04W	2015-03-07	9	0	9	0	9	1	9		2015-02-09	26	0	9
5	23	Edi-0 4WV	Edi-0	04W	2015-03-08	8	1	9	0	8	1	9		2015-02-09	27	1	9
7	23	Edi-0 4WV	Edi-0	04W	2015-03-09	10	0	10	0	10	1	10		2015-02-09	28	0	10
8	23	Edi-0 4WV	Edi-0	04W	2015-03-09	8	0	8	0	8	1	8		2015-02-09	28	0	8
10	23	Edi-0 4WV	Edi-0	04W	2015-03-07	8	0	8	0	8	1	8		2015-02-09	26	0	8
11	23	Edi-0 4WV	Edi-0	04W	2015-03-06	8	2	10	0	8	1	10		2015-02-09	25	2	10
12	23	Edi-0 4WV	Edi-0	04W	2015-03-06	10	0	10	0	10	1	10		2015-02-09	25	0	10
15	23	Edi-0 4WV	Edi-0	04W	2015-03-04	10	1	11	0	10	1	11		2015-02-09	23	1	11
2	22	Edi-0 8WV	Edi-0	08W	2015-02-24	5	9	14	0	5	1	14		2015-02-09	15	9	14
3	22	Edi-0 8WV	Edi-0	08W	2015-02-25	5	6	11	0	5	1	11		2015-02-09	16	6	11
4	22	Edi-0 8WV	Edi-0	08W	2015-02-25	4	5	9	0	4	1	9	rep 9	2015-02-09	16	5	9
6	22	Edi-0 8WV	Edi-0	08W				0	0	0	#DIV/0!	0	rep 3	2015-02-09			0
8	22	Edi-0 8WV	Edi-0	08W	2015-02-25	3	6	9	0	3	1	9	purple plant	2015-02-09	16	6	9
9	22	Edi-0 8WV	Edi-0	08W	2015-02-25	5	9	14	0	5	1	14		2015-02-09	16	9	14
11	22	Edi-0 8WV	Edi-0	08W	2015-02-25	4	7	11	0	4	1	11		2015-02-09	16	7	11
12	22	Edi-0 8WV	Edi-0	08W	2015-02-24	4	7	11	0	4	1	11		2015-02-09	15	7	11
14	22	Edi-0 8WV	Edi-0	08W	2015-02-25	4	6	10	0	4	1	10	rep 4	2015-02-09	16	6	10
1	21	Edi-0 12WV	Edi-0	12W	2015-02-19	5	6	11	0	5	1	11		2015-02-09	10	6	11
4	21	Edi-0 12WV	Edi-0	12W	2015-02-19	5	6	11	0	5	1	11		2015-02-09	10	6	11
5	21	Edi-0 12WV	Edi-0	12W	2015-02-19	5	5	10	0	5	1	10		2015-02-09	10	5	10
7	21	Edi-0 12WV	Edi-0	12W				0	0	0	#DIV/0!	0		2015-02-09			0
9	21	Edi-0 12WV	Edi-0	12W	2015-02-19	5	8	13	0	5	1	13		2015-02-09	10	8	13
9	21	Edi-0 12WV	Edi-0	12W	2015-02-19	6	8	14	0	6	1	14		2015-02-09	10	8	14
11	21	Edi-0 12WV	Edi-0	12W	2015-02-22	4	9	13	0	4	1	13		2015-02-09	13	9	13
13	21	Edi-0 12WV	Edi-0	12W	2015-02-19	6	10	16	0	6	1	16		2015-02-09	10	10	16
15	21	Edi-0 12WV	Edi-0	12W	2015-02-23	5	1	6	0	5	1	6		2015-02-09	14	1	6
1	30	Lov-1 NV	Lov-1	NV	2015-06-09	0	0	0	0	0	0	0	very late, flowered just before cut off	2015-02-09	120	0	0
2	30	Lov-1 NV	Lov-1	NV	2015-06-09	0	0	0	0	0	0	0		2015-02-09
5	30	Lov-1 NV	Lov-1	NV	2015-06-09	0	0	0	0	0	0	0		2015-02-09
7	30	Lov-1 NV	Lov-1	NV	2015-06-09	0	0	0	0	0	0	0	very late, flowered just before cut off	2015-02-09	120	0	0
8	30	Lov-1 NV	Lov-1	NV	2015-06-09	0	0	0	0	0	0	0	very late, flowered just before cut off	2015-02-09	120	0	0
9	30	Lov-1 NV	Lov-1	NV	2015-06-09	0	0	0	0	0	0	0		2015-02-09
11	30	Lov-1 NV	Lov-1	NV	2015-06-09	0	0	0	0	0	0	0	very late, flowered just before cut off	2015-02-09	120	0	0
13	30	Lov-1 NV	Lov-1	NV	2015-06-09	0	0	0	0	0	0	0		2015-02-09
15	30	Lov-1 NV	Lov-1	NV	2015-06-09	0	0	0	0	0	0	0		2015-02-09
2	29	Lov- 1 2WV	Lov-1	02W	2015-06-01	0	0	0	0	0	#DIV/0!	0		2015-02-09	112	0	0
2	29	Lov- 1 2WV	Lov-1	02W	2015-05-01	18	0	18	0	18	1	18		2015-02-09	81	0	18
5	29	Lov- 1 2WV	Lov-1	02W				0	0	0	#DIV/0!	0		2015-02-09			0
6	29	Lov- 1 2WV	Lov-1	02W	2015-06-01	0	0	0	0	0	#DIV/0!	0		2015-02-09	112	0	0
8	29	Lov- 1 2WV	Lov-1	02W	2015-05-20	14	0	14	0	14	1	14		2015-02-09	100	0	14
10	29	Lov- 1 2WV	Lov-1	02W				0	0	0	#DIV/0!	0	very late, flowered just before cut off	2015-02-09			0
11	29	Lov- 1 2WV	Lov-1	02W	2015-06-01	0	0	0	0	0	0	0		2015-02-09	112	0	0
13	29	Lov- 1 2WV	Lov-1	02W	2015-06-09	0	0	0	0	0	0	0	very late, flowered just before cut off	2015-02-09	120	0	0
15	29	Lov- 1 2WV	Lov-1	02W	2015-06-09	0	0	0	0	0	0	0	very late, flowered just before cut off	2015-02-09	120	0	0
1	28	Lov-1 4WV	Lov-1	04W	2015-03-26	11	0	11	0	11	1	11		2015-02-09	45	0	11
3	28	Lov-1 4WV	Lov-1	04W	2015-04-05	15	1	16	0	15	1	16	aerial rosettes	2015-02-09	55	1	16
5	28	Lov-1 4WV	Lov-1	04W				0	0	0	#DIV/0!	0	aerial rosettes	2015-02-09			0
7	28	Lov-1 4WV	Lov-1	04W	2015-04-11	17	1	18	0	17	1	18	aerial rosettes	2015-02-09	61	1	18
7	28	Lov-1 4WV	Lov-1	04W	2015-03-28	17	0	17	0	17	1	17	aerial rosettes	2015-02-09	47	0	17
10	28	Lov-1 4WV	Lov-1	04W	2015-04-11	20	0	20	0	20	1	20		2015-02-09	61	0	20
12	28	Lov-1 4WV	Lov-1	04W	2015-04-28	16	3	19	0	16	1	19		2015-02-09	78	3	19
12	28	Lov-1 4WV	Lov-1	04W	2015-04-03	12	0	12	0	12	1	12		2015-02-09	53	0	12
15	28	Lov-1 4WV	Lov-1	04W	2015-03-29	16	5	21	0	16	1	21		2015-02-09	48	5	21
1	27	Lov-1 8WV	Lov-1	08W	2015-02-26	8	4	12	0	8	1	12		2015-02-09	17	4	12
3	27	Lov-1 8WV	Lov-1	08W	2015-03-01	9	4	13	0	9	1	13		2015-02-09	20	4	13
5	27	Lov-1 8WV	Lov-1	08W	2015-02-25	8	4	12	0	8	1	12		2015-02-09	16	4	12
6	27	Lov-1 8WV	Lov-1	08W	2015-03-04	10	2	12	0	10	1	12		2015-02-09	23	2	12
8	27	Lov-1 8WV	Lov-1	08W	2015-02-27	7	6	13	0	7	1	13		2015-02-09	18	6	13
10	27	Lov-1 8WV	Lov-1	08W	2015-02-27	8	6	14	0	8	1	14		2015-02-09	18	6	14
11	27	Lov-1 8WV	Lov-1	08W	2015-02-27	7	5	12	0	7	1	12		2015-02-09	18	5	12
12	27	Lov-1 8WV	Lov-1	08W	2015-03-02	6	4	10	2	8	0.75	12	2 empty cauline nodes	2015-02-09	21	4	10
15	27	Lov-1 8WV	Lov-1	08W	2015-02-28	9	2	11	0	9	1	11		2015-02-09	19	2	11
2	26	Lov-1 12WV	Lov-1	12W	2015-02-19	3	7	10	0	3	1	10		2015-02-09	10	7	10
3	26	Lov-1 12WV	Lov-1	12W	2015-02-19	5	7	12	0	5	1	12		2015-02-09	10	7	12
4	26	Lov-1 12WV	Lov-1	12W	2015-02-20	3	7	10	0	3	1	10		2015-02-09	11	7	10
7	26	Lov-1 12WV	Lov-1	12W	2015-02-22	4	7	11	0	4	1	11		2015-02-09	13	7	11
8	26	Lov-1 12WV	Lov-1	12W				0	0	0	#DIV/0!	0		2015-02-09			0
9	26	Lov-1 12WV	Lov-1	12W	2015-02-25	7	8	15	0	7	1	15		2015-02-09	16	8	15
12	26	Lov-1 12WV	Lov-1	12W	2015-02-19	4	8	12	0	4	1	12		2015-02-09	10	8	12
14	26	Lov-1 12WV	Lov-1	12W	2015-02-19	5	6	11	0	5	1	11		2015-02-09	10	6	11
15	26	Lov-1 12WV	Lov-1	12W	2015-02-19	6	6	12	0	6	1	12		2015-02-09	10	6	12
1	35	Ull2-5 NV	Ull2-5	NV	2015-06-09	0	0	0	0	0	#DIV/0!	0		2015-02-09
3	35	Ull2-5 NV	Ull2-5	NV	2015-06-09	0	0	0	0	0	#DIV/0!	0		2015-02-09
5	35	Ull2-5 NV	Ull2-5	NV	2015-06-09	0	0	0	0	0	#DIV/0!	0		2015-02-09
6	35	Ull2-5 NV	Ull2-5	NV	2015-06-09	0	0	0	0	0	#DIV/0!	0		2015-02-09
8	35	Ull2-5 NV	Ull2-5	NV	2015-06-09	0	0	0	0	0	#DIV/0!	0		2015-02-09
10	35	Ull2-5 NV	Ull2-5	NV	2015-06-09	0	0	0	0	0	#DIV/0!	0		2015-02-09
12	35	Ull2-5 NV	Ull2-5	NV	2015-06-09	0	0	0	0	0	#DIV/0!	0		2015-02-09
13	35	Ull2-5 NV	Ull2-5	NV	2015-06-09	0	0	0	0	0	#DIV/0!	0		2015-02-09
15	35	Ull2-5 NV	Ull2-5	NV	2015-06-09	0	0	0	0	0	#DIV/0!	0		2015-02-09
1	34	Ull2-5 2WV	Ull2-5	02W	2015-04-23	13	0	13	0	13	1	13		2015-02-09	73	0	13
3	34	Ull2-5 2WV	Ull2-5	02W				0	0	0	#DIV/0!	0		2015-02-09			0
4	34	Ull2-5 2WV	Ull2-5	02W	2015-04-23	18	0	18	0	18	1	18		2015-02-09	73	0	18
6	34	Ull2-5 2WV	Ull2-5	02W	2015-04-25	11	0	11	0	11	1	11		2015-02-09	75	0	11
9	34	Ull2-5 2WV	Ull2-5	02W				0	0	0	#DIV/0!	0		2015-02-09			0
9	34	Ull2-5 2WV	Ull2-5	02W				0	0	0	#DIV/0!	0		2015-02-09			0
11	34	Ull2-5 2WV	Ull2-5	02W				0	0	0	#DIV/0!	0		2015-02-09			0
12	34	Ull2-5 2WV	Ull2-5	02W	2015-05-17	0	1	1	0	0	#DIV/0!	1		2015-02-09	97	1	1
15	34	Ull2-5 2WV	Ull2-5	02W				0	0	0	#DIV/0!	0		2015-02-09			0
1	33	Ull2-5 4WV	Ull2-5	04W	2015-04-11	13	0	13	0	13	1	13	all aerial rosettes, 2 empty rosettes	2015-02-09	61	0	13
4	33	Ull2-5 4WV	Ull2-5	04W	2015-04-09	13	0	13	3	16	0.8125	16	aerial rosettes	2015-02-09	59	0	13
5	33	Ull2-5 4WV	Ull2-5	04W	2015-03-30	8	0	8	0	8	1	8	aerial rosettes	2015-02-09	49	0	8
6	33	Ull2-5 4WV	Ull2-5	04W	2015-04-06	3	0	3	0	3	1	3		2015-02-09	56	0	3
8	33	Ull2-5 4WV	Ull2-5	04W	2015-04-08	3	0	3	0	3	1	3		2015-02-09	58	0	3
9	33	Ull2-5 4WV	Ull2-5	04W	2015-04-07	14	0	14	0	14	1	14		2015-02-09	57	0	14
11	33	Ull2-5 4WV	Ull2-5	04W	2015-04-07	14	0	14	0	14	1	14	aerial rosettes	2015-02-09	57	0	14
13	33	Ull2-5 4WV	Ull2-5	04W	2015-04-12	2	0	2	0	2	1	2	16 aerial rosettes	2015-02-09	62	0	2
14	33	Ull2-5 4WV	Ull2-5	04W				0	0	0	#DIV/0!	0		2015-02-09			0
2	32	Ull2-5 8WV	Ull2-5	08W	2015-03-11	12	0	12	0	12	1	12		2015-02-09	30	0	12
3	32	Ull2-5 8WV	Ull2-5	08W	2015-03-14	12	0	12	0	12	1	12		2015-02-09	33	0	12
5	32	Ull2-5 8WV	Ull2-5	08W	2015-03-09	12	0	12	1	13	0.923077	13		2015-02-09	28	0	12
6	32	Ull2-5 8WV	Ull2-5	08W	2015-03-14	10	1	11	0	10	1	11		2015-02-09	33	1	11
7	32	Ull2-5 8WV	Ull2-5	08W	2015-03-14	14	0	14	0	14	1	14		2015-02-09	33	0	14
10	32	Ull2-5 8WV	Ull2-5	08W	2015-03-11	10	0	10	0	10	1	10		2015-02-09	30	0	10
12	32	Ull2-5 8WV	Ull2-5	08W	2015-03-14	13	0	13	0	13	1	13		2015-02-09	33	0	13
14	32	Ull2-5 8WV	Ull2-5	08W	2015-03-09	11	1	12	0	11	1	12		2015-02-09	28	1	12
14	32	Ull2-5 8WV	Ull2-5	08W	2015-03-19	12	0	12	0	12	1	12		2015-02-09	38	0	12
2	31	Ull2-5 12WV	Ull2-5	12W	2015-02-26	7	3	10	0	7	1	10		2015-02-09	17	3	10
3	31	Ull2-5 12WV	Ull2-5	12W				0	0	0	#DIV/0!	0		2015-02-09			0
5	31	Ull2-5 12WV	Ull2-5	12W	2015-02-24	6	4	10	0	6	1	10		2015-02-09	15	4	10
7	31	Ull2-5 12WV	Ull2-5	12W	2015-02-24	7	0	7	0	7	1	7		2015-02-09	15	0	7
8	31	Ull2-5 12WV	Ull2-5	12W	2015-02-26	4	1	5	0	4	1	5		2015-02-09	17	1	5
10	31	Ull2-5 12WV	Ull2-5	12W	2015-03-03	9	4	13	0	9	1	13	main stem broken, 9 CLN	2015-02-09	22	4	13
11	31	Ull2-5 12WV	Ull2-5	12W	2015-03-02	7	1	8	0	7	1	8		2015-02-09	21	1	8
14	31	Ull2-5 12WV	Ull2-5	12W	2015-02-27	5	1	6	0	5	1	6		2015-02-09	18	1	6
15	31	Ull2-5 12WV	Ull2-5	12W	2015-03-04	8	2	10	0	8	1	10		2015-02-09	23	2	10
1	40	Var2-6 NV	Var2-6	NV	2015-06-09	0	0	0	0	0	0	0		2015-02-09
3	40	Var2-6 NV	Var2-6	NV	2015-06-01	0	0	0	0	0	0	0		2015-02-09	112	0	0
4	40	Var2-6 NV	Var2-6	NV	2015-04-21	0	0	0	0	0	0	0		2015-02-09	71	0	0
6	40	Var2-6 NV	Var2-6	NV				0	0	0	0	0		2015-02-09			0
8	40	Var2-6 NV	Var2-6	NV	2015-06-09	0	0	0	0	0	0	0		2015-02-09
10	40	Var2-6 NV	Var2-6	NV	2015-05-15	11	0	11	0	11	1	11		2015-02-09	95	0	11
11	40	Var2-6 NV	Var2-6	NV	2015-05-08	0	0	0	0	0	0	0		2015-02-09	88	0	0
13	40	Var2-6 NV	Var2-6	NV	2015-06-09	0	0	0	0	0	0	0		2015-02-09
14	40	Var2-6 NV	Var2-6	NV				0	0	0	0	0		2015-02-09			0
1	39	Var2-6 2WV	Var2-6	02W	2015-06-03	0	0	0	0	0	0	0	flowered from side	2015-02-09	114	0	0
3	39	Var2-6 2WV	Var2-6	02W				0	0	0	0	0		2015-02-09			0
5	39	Var2-6 2WV	Var2-6	02W	2015-04-07	0	0	0	0	0	0	0		2015-02-09	57	0	0
7	39	Var2-6 2WV	Var2-6	02W				0	0	0	0	0		2015-02-09			0
9	39	Var2-6 2WV	Var2-6	02W				0	0	0	0	0		2015-02-09			0
10	39	Var2-6 2WV	Var2-6	02W	2015-05-08	0	1	1	0	0	0	1		2015-02-09	88	1	1
12	39	Var2-6 2WV	Var2-6	02W				0	0	0	0	0		2015-02-09			0
13	39	Var2-6 2WV	Var2-6	02W	2015-04-09	1	0	1	0	1	1	1		2015-02-09	59	0	1
14	39	Var2-6 2WV	Var2-6	02W				0	0	0	0	0		2015-02-09			0
2	38	Var2-6 4WV	Var2-6	04W	2015-03-23	4	0	4	0	4	1	4		2015-02-09	42	0	4
2	38	Var2-6 4WV	Var2-6	04W	2015-03-23	2	0	2	0	2	1	2		2015-02-09	42	0	2
4	38	Var2-6 4WV	Var2-6	04W	2015-03-25	5	0	5	0	5	1	5		2015-02-09	44	0	5
7	38	Var2-6 4WV	Var2-6	04W				0	0	0	#DIV/0!	0		2015-02-09			0
7	38	Var2-6 4WV	Var2-6	04W	2015-03-23	5	0	5	0	5	1	5		2015-02-09	42	0	5
9	38	Var2-6 4WV	Var2-6	04W	2015-03-29	0	0	0	0	0	0	0		2015-02-09	48	0	0
11	38	Var2-6 4WV	Var2-6	04W	2015-04-01	0	0	0	0	0	0	0		2015-02-09	51	0	0
13	38	Var2-6 4WV	Var2-6	04W				0	0	0	0	0		2015-02-09			0
15	38	Var2-6 4WV	Var2-6	04W	2015-04-11	0	3	3	0	0	0	3		2015-02-09	61	3	3
2	37	Var2-6 8WV	Var2-6	08W	2015-03-09	3	2	5	1	4	0.75	6		2015-02-09	28	2	5
3	37	Var2-6 8WV	Var2-6	08W	2015-03-09	5	1	6	1	6	0.833333	7		2015-02-09	28	1	6
5	37	Var2-6 8WV	Var2-6	08W	2015-03-11	5	2	7	0	5	1	7		2015-02-09	30	2	7
6	37	Var2-6 8WV	Var2-6	08W	2015-03-09	4	2	6	0	4	1	6		2015-02-09	28	2	6
8	37	Var2-6 8WV	Var2-6	08W				0	0	0	#DIV/0!	0		2015-02-09			0
10	37	Var2-6 8WV	Var2-6	08W	2015-03-10	5	1	6	0	5	1	6		2015-02-09	29	1	6
11	37	Var2-6 8WV	Var2-6	08W	2015-03-09	6	1	7	0	6	1	7		2015-02-09	28	1	7
13	37	Var2-6 8WV	Var2-6	08W	2015-03-09	5	1	6	0	5	1	6		2015-02-09	28	1	6
15	37	Var2-6 8WV	Var2-6	08W	2015-03-08	5	1	6	0	5	1	6		2015-02-09	27	1	6
1	36	Var2-6 12WV	Var2-6	12W	2015-02-27	3	7	10	0	3	1	10		2015-02-09	18	7	10
4	36	Var2-6 12WV	Var2-6	12W	2015-02-26	4	8	12	0	4	1	12		2015-02-09	17	8	12
5	36	Var2-6 12WV	Var2-6	12W	2015-02-27	4	7	11	0	4	1	11		2015-02-09	18	7	11
6	36	Var2-6 12WV	Var2-6	12W	2015-02-26	5	7	12	0	5	1	12		2015-02-09	17	7	12
8	36	Var2-6 12WV	Var2-6	12W	2015-02-24	5	8	13	0	5	1	13		2015-02-09	15	8	13
9	36	Var2-6 12WV	Var2-6	12W	2015-02-26	4	7	11	0	4	1	11		2015-02-09	17	7	11
12	36	Var2-6 12WV	Var2-6	12W	2015-02-25	3	6	9	0	3	1	9		2015-02-09	16	6	9
12	36	Var2-6 12WV	Var2-6	12W	2015-03-02	5	9	14	0	5	1	14		2015-02-09	21	9	14
15	36	Var2-6 12WV	Var2-6	12W	2015-02-24	4	5	9	0	4	1	9		2015-02-09	15	5	9

## Sheet: Experiment 2 (Fig. S1-2C, D)
Tray	Plot	Variety	Genotype	Genotype and treatment	Weeks Vern treatment	Buds visible	Position	date transfer	dtb	DNFdtb	Cauline branches	Rosette leaf branches	Total	Rosette branching (no dnf)	Total branches (no dnf)
7	42	C00	Col FRI	Col FRI NV	0	2018-05-15	1	2018-03-14	62	62	2	3	5	3	8		dnf = did not flower
7	42	C00	Col FRI	Col FRI NV	0	2018-05-25	3	2018-03-14	72	72	11	2	13	2	15		dtb = days to bolting
7	42	C00	Col FRI	Col FRI NV	0	2018-06-04	4	2018-03-14	82	82	9	0	9	0	9
7	42	C00	Col FRI	Col FRI NV	0	dnf	2	2018-03-14		100				0	0
8	43	C00	Col FRI	Col FRI NV	0	2018-06-01	1	2018-03-14	79	79	9	0	9	0	9
8	43	C00	Col FRI	Col FRI NV	0	dnf	2	2018-03-14		100				0	0
8	43	C00	Col FRI	Col FRI NV	0	dnf	3	2018-03-14		100				0	0
8	43	C00	Col FRI	Col FRI NV	0	dnf	4	2018-03-14		100				0	0
10	58	C02	Col FRI	Col FRI 2WV	2	2018-04-15	1	2018-03-14	32	32	9	2	11	2	13
10	58	C02	Col FRI	Col FRI 2WV	2	2018-04-18	3	2018-03-14	35	35	7	4	11	4	15
10	58	C02	Col FRI	Col FRI 2WV	2	2018-04-18	4	2018-03-14	35	35	8	1	9	1	10
10	58	C02	Col FRI	Col FRI 2WV	2	2018-04-20	2	2018-03-14	37	37	8	6	14	6	20
11	61	C02	Col FRI	Col FRI 2WV	2	2018-04-15	1	2018-03-14	32	32	7	3	10	3	13
11	61	C02	Col FRI	Col FRI 2WV	2	2018-04-18	3	2018-03-14	35	35	9	2	11	2	13
11	61	C02	Col FRI	Col FRI 2WV	2	2018-04-20	2	2018-03-14	37	37
11	61	C02	Col FRI	Col FRI 2WV	2	2018-04-20	4	2018-03-14	37	37	8	3	11	3	14
6	32	C04	Col FRI	Col FRI 4WV	4	2018-04-05	1	2018-03-14	22	22	5	6	11	6	17
6	32	C04	Col FRI	Col FRI 4WV	4	2018-04-05	2	2018-03-14	22	22	7	3	10	3	13
6	32	C04	Col FRI	Col FRI 4WV	4	2018-04-05	3	2018-03-14	22	22	5	4	9	4	13
6	32	C04	Col FRI	Col FRI 4WV	4	2018-04-05	4	2018-03-14	22	22	6	3	9	3	12
6	35	C04	Col FRI	Col FRI 4WV	4	2018-04-06	1	2018-03-14	23	23	6	3	9	3	12
6	35	C04	Col FRI	Col FRI 4WV	4	2018-04-07	3	2018-03-14	24	24	6	4	10	4	14
6	35	C04	Col FRI	Col FRI 4WV	4	2018-04-07	4	2018-03-14	24	24	7	2	9	2	11
6	35	C04	Col FRI	Col FRI 4WV	4	2018-04-08	2	2018-03-14	25	25	7	2	9	2	11
1	2	C06	Col FRI	Col FRI 6WV	6	2018-04-01	1	2018-03-14	18	18	4	6	10	6	16
1	2	C06	Col FRI	Col FRI 6WV	6	2018-04-01	2	2018-03-14	18	18	4	4	8	4	12
1	2	C06	Col FRI	Col FRI 6WV	6	2018-04-01	3	2018-03-14	18	18	4	5	9	5	14
1	2	C06	Col FRI	Col FRI 6WV	6	2018-04-01	4	2018-03-14	18	18	5	2	7	2	9
2	12	C06	Col FRI	Col FRI 6WV	6	2018-03-31	2	2018-03-14	17	17	3	6	9	6	15
2	12	C06	Col FRI	Col FRI 6WV	6	2018-04-01	1	2018-03-14	18	18	4	6	10	6	16
2	12	C06	Col FRI	Col FRI 6WV	6	2018-04-01	3	2018-03-14	18	18	4	6	10	6	16
2	12	C06	Col FRI	Col FRI 6WV	6	2018-04-01	4	2018-03-14	18	18	4	6	10	6	16
5	27	C08	Col FRI	Col FRI 8WV	8	2018-03-27	1	2018-03-14	13	13	4	6	10	6	16
5	27	C08	Col FRI	Col FRI 8WV	8	2018-03-27	2	2018-03-14	13	13	4	5	9	5	14
5	27	C08	Col FRI	Col FRI 8WV	8	2018-03-27	3	2018-03-14	13	13	4	6	10	6	16
5	27	C08	Col FRI	Col FRI 8WV	8	2018-03-27	4	2018-03-14	13	13	4	8	12	8	20
7	39	C08	Col FRI	Col FRI 8WV	8	2018-03-27	1	2018-03-14	13	13	4	7	11	7	18
7	39	C08	Col FRI	Col FRI 8WV	8	2018-03-28	2	2018-03-14	14	14	4	6	10	6	16
7	39	C08	Col FRI	Col FRI 8WV	8	2018-03-28	3	2018-03-14	14	14
7	39	C08	Col FRI	Col FRI 8WV	8	2018-03-28	4	2018-03-14	14	14	3	7	10	7	17
5	26	C12	Col FRI	Col FRI 12WV	12	2018-03-26	2	2018-03-14	12	12	2	7	9	7	16
5	26	C12	Col FRI	Col FRI 12WV	12	2018-03-26	4	2018-03-14	12	12	3	8	11	8	19
5	26	C12	Col FRI	Col FRI 12WV	12	2018-03-27	1	2018-03-14	13	13	3	10	13	10	23
5	26	C12	Col FRI	Col FRI 12WV	12	2018-03-27	3	2018-03-14	13	13	4	8	12	8	20
7	38	C12	Col FRI	Col FRI 12WV	12	2018-03-25	4	2018-03-14	11	11	1	11	12	11	23
7	38	C12	Col FRI	Col FRI 12WV	12	2018-03-26	1	2018-03-14	12	12	1	7	8	7	15
7	38	C12	Col FRI	Col FRI 12WV	12	2018-03-26	2	2018-03-14	12	12	1	8	9	8	17
7	38	C12	Col FRI	Col FRI 12WV	12	2018-03-27	3	2018-03-14	13	13	2	8	10	8	18
2	8	Edi-0	Edi-0	Edi-0 NV	0	2018-05-28	1	2018-03-14	75	75	10	0	10	0	10
2	8	E00	Edi-0	Edi-0 NV	0	2018-06-12	2	2018-03-14	90	90	10	0	10	0	10
2	8	E00	Edi-0	Edi-0 NV	0	dnf	3	2018-03-14		100				0	0
2	8	E00	Edi-0	Edi-0 NV	0	missing	4	2018-03-14
10	55	E00	Edi-0	Edi-0 NV	0	2018-05-25	4	2018-03-14	72	72	12	0	12	0	12
10	55	E00	Edi-0	Edi-0 NV	0	dnf	1	2018-03-14		100				0	0
10	55	E00	Edi-0	Edi-0 NV	0	dnf	2	2018-03-14		100				0	0
10	55	E00	Edi-0	Edi-0 NV	0	dnf	3	2018-03-14		100				0	0
4	21	E02	Edi-0	Edi-0 2WV	2	2018-04-20	1	2018-03-14	37	37	12	3	15	3	18
4	21	E02	Edi-0	Edi-0 2WV	2	2018-04-20	3	2018-03-14	37	37	11	0	11	0	11
4	21	E02	Edi-0	Edi-0 2WV	2	2018-04-25	4	2018-03-14	42	42	11	1	12	1	13
4	21	E02	Edi-0	Edi-0 2WV	2	missing	2	2018-03-14
12	71	E02	Edi-0	Edi-0 2WV	2	2018-04-19	3	2018-03-14	36	36	10	2	12	2	14
12	71	E02	Edi-0	Edi-0 2WV	2	2018-04-21	1	2018-03-14	38	38	11	0	11	0	11
12	71	E02	Edi-0	Edi-0 2WV	2	2018-04-21	4	2018-03-14	38	38	11	0	11	0	11
12	71	E02	Edi-0	Edi-0 2WV	2	2018-04-22	2	2018-03-14	39	39	9	1	10	1	11
1	4	E04	Edi-0	Edi-0 4WV	4	2018-04-13	1	2018-03-14	30	30	9	2	11	2	13
1	4	E04	Edi-0	Edi-0 4WV	4	2018-04-13	2	2018-03-14	30	30	8	2	10	2	12
1	4	E04	Edi-0	Edi-0 4WV	4	2018-04-18	3	2018-03-14	35	35	8	2	10	2	12
1	4	E04	Edi-0	Edi-0 4WV	4	2018-04-20	4	2018-03-14	37	37	9	1	10	1	11
7	41	E04	Edi-0	Edi-0 4WV	4	2018-04-11	1	2018-03-14	28	28	8	1	9	1	10
7	41	E04	Edi-0	Edi-0 4WV	4	2018-04-11	2	2018-03-14	28	28	10	0	10	0	10
7	41	E04	Edi-0	Edi-0 4WV	4	2018-04-11	3	2018-03-14	28	28	10	0	10	0	10
7	41	E04	Edi-0	Edi-0 4WV	4	2018-04-11	4	2018-03-14	28	28	9	3	12	3	15
2	7	E06	Edi-0	Edi-0 6WV	6	2018-04-04	1	2018-03-14	21	21	4	4	8	4	12
2	7	E06	Edi-0	Edi-0 6WV	6	2018-04-05	3	2018-03-14	22	22	7	5	12	5	17
2	7	E06	Edi-0	Edi-0 6WV	6	2018-04-05	4	2018-03-14	22	22	6	6	12	6	18
2	7	E06	Edi-0	Edi-0 6WV	6	2018-04-06	2	2018-03-14	23	23	6	5	11	5	16
10	56	E06	Edi-0	Edi-0 6WV	6	2018-04-05	1	2018-03-14	22	22	6	2	8	2	10
10	56	E06	Edi-0	Edi-0 6WV	6	2018-04-05	4	2018-03-14	22	22	6	2	8	2	10
10	56	E06	Edi-0	Edi-0 6WV	6	2018-04-07	2	2018-03-14	24	24	7	5	12	5	17
10	56	E06	Edi-0	Edi-0 6WV	6	2018-04-09	3	2018-03-14	26	26	7	4	11	4	15
7	40	E08	Edi-0	Edi-0 8WV	8	2018-04-02	1	2018-03-14	19	19	7	6	13	6	19
7	40	E08	Edi-0	Edi-0 8WV	8	2018-04-02	2	2018-03-14	19	19	7	4	11	4	15
7	40	E08	Edi-0	Edi-0 8WV	8	2018-04-02	4	2018-03-14	19	19	7	5	12	5	17
7	40	E08	Edi-0	Edi-0 8WV	8	2018-04-03	3	2018-03-14	20	20	4	5	9	5	14
11	66	E08	Edi-0	Edi-0 8WV	8	2018-04-03	2	2018-03-14	20	20	4	3	7	3	10
11	66	E08	Edi-0	Edi-0 8WV	8	2018-04-04	1	2018-03-14	21	21	4	6	10	6	16
11	66	E08	Edi-0	Edi-0 8WV	8	2018-04-04	3	2018-03-14	21	21	4	6	10	6	16
11	66	E08	Edi-0	Edi-0 8WV	8	2018-04-04	4	2018-03-14	21	21	5	5	10	5	15
5	29	EN00	Edi-NIL	Edi NIL NV	0	2018-06-02	3	2018-03-14	80	80	3	0	3	0	3
5	29	EN00	Edi-NIL	Edi NIL NV	0	2018-06-07	4	2018-03-14	85	85	3	0	3	0	3
5	29	Edi-NIL	Edi-NIL	Edi NIL NV	0	dnf	1	2018-03-14		100				0	0
5	29	EN00	Edi-NIL	Edi NIL NV	0	dnf	2	2018-03-14		100				0	0
11	63	EN00	Edi-NIL	Edi NIL NV	0	2018-06-02	3	2018-03-14	80	80	6	0	6	0	6
11	63	EN00	Edi-NIL	Edi NIL NV	0	2018-06-07	4	2018-03-14	85	85	6	0	6	0	6
11	63	EN00	Edi-NIL	Edi NIL NV	0	2018-06-12	1	2018-03-14	90	90	0	0	0	0	0
11	63	EN00	Edi-NIL	Edi NIL NV	0	dnf	2	2018-03-14		100				0	0
3	17	EN02	Edi-NIL	Edi NIL 2WV	2	2018-04-18	1	2018-03-14	35	35	9	1	10	1	11
3	17	EN02	Edi-NIL	Edi NIL 2WV	2	2018-04-19	2	2018-03-14	36	36	9	2	11	2	13
3	17	EN02	Edi-NIL	Edi NIL 2WV	2	2018-04-22	3	2018-03-14	39	39
3	17	EN02	Edi-NIL	Edi NIL 2WV	2	2018-04-22	4	2018-03-14	39	39	9	2	11	2	13
9	49	EN02	Edi-NIL	Edi NIL 2WV	2	2018-04-20	1	2018-03-14	37	37	9	0	9	0	9
9	49	EN02	Edi-NIL	Edi NIL 2WV	2	2018-04-20	2	2018-03-14	37	37	7	3	10	3	13
9	49	EN02	Edi-NIL	Edi NIL 2WV	2	2018-05-01	3	2018-03-14	48	48	8	1	9	1	10
9	49	EN02	Edi-NIL	Edi NIL 2WV	2	missing	4	2018-03-14			8	3	11	3	14
5	30	EN04	Edi-NIL	Edi NIL 4WV	4	2018-04-13	1	2018-03-14	30	30	8	3	11	3	14
5	30	EN04	Edi-NIL	Edi NIL 4WV	4	2018-04-13	3	2018-03-14	30	30	6	4	10	4	14
5	30	EN04	Edi-NIL	Edi NIL 4WV	4	2018-04-14	2	2018-03-14	31	31	7	2	9	2	11
5	30	EN04	Edi-NIL	Edi NIL 4WV	4	2018-04-15	4	2018-03-14	32	32	8	2	10	2	12
11	64	EN04	Edi-NIL	Edi NIL 4WV	4	2018-04-11	1	2018-03-14	28	28	9	2	11	2	13
11	64	EN04	Edi-NIL	Edi NIL 4WV	4	2018-04-11	2	2018-03-14	28	28	11	1	12	1	13
11	64	EN04	Edi-NIL	Edi NIL 4WV	4	2018-04-11	3	2018-03-14	28	28	7	2	9	2	11
11	64	EN04	Edi-NIL	Edi NIL 4WV	4	2018-04-11	4	2018-03-14	28	28	7	3	10	3	13
2	9	EN06	Edi-NIL	Edi NIL 6WV	6	2018-04-03	1	2018-03-14	20	20	3	5	8	5	13
2	9	EN06	Edi-NIL	Edi NIL 6WV	6	2018-04-04	2	2018-03-14	21	21	4	5	9	5	14
2	9	EN06	Edi-NIL	Edi NIL 6WV	6	2018-04-04	3	2018-03-14	21	21	4	5	9	5	14
2	9	EN06	Edi-NIL	Edi NIL 6WV	6	2018-04-04	4	2018-03-14	21	21	5	5	10	5	15
12	70	EN06	Edi-NIL	Edi NIL 6WV	6	2018-04-05	1	2018-03-14	22	22	3	4	7	4	11
12	70	EN06	Edi-NIL	Edi NIL 6WV	6	2018-04-05	2	2018-03-14	22	22	4	5	9	5	14
12	70	EN06	Edi-NIL	Edi NIL 6WV	6	2018-04-05	3	2018-03-14	22	22	4	4	8	4	12
12	70	EN06	Edi-NIL	Edi NIL 6WV	6	2018-04-10	4	2018-03-14	27	27	6	5	11	5	16
11	62	EN08	Edi-NIL	Edi NIL 8WV	8	2018-04-01	1	2018-03-14	18	18	6	5	11	5	16
11	62	EN08	Edi-NIL	Edi NIL 8WV	8	2018-04-02	2	2018-03-14	19	19	5	5	10	5	15
11	62	EN08	Edi-NIL	Edi NIL 8WV	8	2018-04-02	3	2018-03-14	19	19	2	5	7	5	12
11	65	EN08	Edi-NIL	Edi NIL 8WV	8	2018-04-03	1	2018-03-14	20	20	3	5	8	5	13
11	65	EN08	Edi-NIL	Edi NIL 8WV	8	2018-04-03	2	2018-03-14	20	20	3	5	8	5	13
11	62	EN08	Edi-NIL	Edi NIL 8WV	8	2018-04-03	4	2018-03-14	20	20	2	4	6	4	10
11	65	EN08	Edi-NIL	Edi NIL 8WV	8	2018-04-03	4	2018-03-14	20	20	5	6	11	6	17
11	65	EN08	Edi-NIL	Edi NIL 8WV	8	2018-04-04	3	2018-03-14	21	21	2	5	7	5	12
3	15	Lov-NIL	Lov NIL2	Lov NIL2 NV	0	dnf	1	2018-03-14		100				0	0
3	15	LN00	Lov NIL2	Lov NIL2 NV	0	dnf	2	2018-03-14		100				0	0
3	15	LN00	Lov NIL2	Lov NIL2 NV	0	dnf	3	2018-03-14		100				0	0
3	15	LN00	Lov NIL2	Lov NIL2 NV	0	dnf	4	2018-03-14		100				0	0
4	24	LN00	Lov NIL2	Lov NIL2 NV	0	dnf	1	2018-03-14		100				0	0
4	24	LN00	Lov NIL2	Lov NIL2 NV	0	dnf	2	2018-03-14		100				0	0
4	24	LN00	Lov NIL2	Lov NIL2 NV	0	dnf	3	2018-03-14		100				0	0
4	24	LN00	Lov NIL2	Lov NIL2 NV	0	dnf	4	2018-03-14		100				0	0
6	31	LN04	Lov NIL2	Lov NIL2 4WV	4	2018-04-15	3	2018-03-14	32	32	4	3	7	3	10
6	31	LN04	Lov NIL2	Lov NIL2 4WV	4	2018-04-17	2	2018-03-14	34	34	6	2	8	2	10
6	31	LN04	Lov NIL2	Lov NIL2 4WV	4	2018-04-19	4	2018-03-14	36	36	6	0	6	0	6
6	31	LN04	Lov NIL2	Lov NIL2 4WV	4	2018-04-20	1	2018-03-14	37	37	6	2	8	2	10
12	68	LN04	Lov NIL2	Lov NIL2 4WV	4	2018-04-19	1	2018-03-14	36	36	6	0	6	0	6
12	68	LN04	Lov NIL2	Lov NIL2 4WV	4	2018-04-19	3	2018-03-14	36	36	6	0	6	0	6
12	68	LN04	Lov NIL2	Lov NIL2 4WV	4	2018-04-22	4	2018-03-14	39	39	6	0	6	0	6
12	68	LN04	Lov NIL2	Lov NIL2 4WV	4	dnf	2	2018-03-14		100				0	0
1	3	LN06	Lov NIL2	Lov NIL2 6WV	6	2018-04-01	1	2018-03-14	18	18	4	6	10	6	16
1	3	LN06	Lov NIL2	Lov NIL2 6WV	6	2018-04-02	2	2018-03-14	19	19	3	5	8	5	13
1	3	LN06	Lov NIL2	Lov NIL2 6WV	6	2018-04-02	3	2018-03-14	19	19	3	5	8	5	13
1	3	LN06	Lov NIL2	Lov NIL2 6WV	6	2018-04-04	4	2018-03-14	21	21	3	5	8	5	13
8	47	LN06	Lov NIL2	Lov NIL2 6WV	6	2018-04-06	1	2018-03-14	23	23	3	5	8	5	13
8	47	LN06	Lov NIL2	Lov NIL2 6WV	6	2018-04-06	2	2018-03-14	23	23	6	2	8	2	10
8	47	LN06	Lov NIL2	Lov NIL2 6WV	6	2018-04-06	3	2018-03-14	23	23	3	5	8	5	13
8	47	LN06	Lov NIL2	Lov NIL2 6WV	6	2018-04-07	4	2018-03-14	24	24	2	5	7	5	12
4	23	LN08	Lov NIL2	Lov NIL2 8WV	8	2018-03-28	1	2018-03-14	14	14	4	7	11	7	18
4	23	LN08	Lov NIL2	Lov NIL2 8WV	8	2018-03-28	2	2018-03-14	14	14	5	5	10	5	15
4	23	LN08	Lov NIL2	Lov NIL2 8WV	8	2018-03-28	3	2018-03-14	14	14	5	0	5	0	5
4	23	LN08	Lov NIL2	Lov NIL2 8WV	8	2018-03-28	4	2018-03-14	14	14	5	6	11	6	17
8	44	LN08	Lov NIL2	Lov NIL2 8WV	8	2018-03-31	2	2018-03-14	17	17	3	5	8	5	13
8	44	LN08	Lov NIL2	Lov NIL2 8WV	8	2018-03-31	4	2018-03-14	17	17	4	8	12	8	20
8	44	LN08	Lov NIL2	Lov NIL2 8WV	8	2018-04-01	3	2018-03-14	18	18	3	6	9	6	15
8	44	LN08	Lov NIL2	Lov NIL2 8WV	8	2018-04-03	1	2018-03-14	20	20	3	5	8	5	13
4	20	LN12	Lov NIL2	Lov NIL2 12WV	12	2018-03-25	1	2018-03-14	11	11	3	8	11	8	19
4	20	LN12	Lov NIL2	Lov NIL2 12WV	12	2018-03-25	2	2018-03-14	11	11	2	8	10	8	18
4	20	LN12	Lov NIL2	Lov NIL2 12WV	12	2018-03-25	4	2018-03-14	11	11	3	5	8	5	13
4	20	LN12	Lov NIL2	Lov NIL2 12WV	12	2018-03-26	3	2018-03-14	12	12	3	7	10	7	17
10	60	LN12	Lov NIL2	Lov NIL2 12WV	12	2018-03-25	3	2018-03-14	11	11	3	5	8	5	13
10	60	LN12	Lov NIL2	Lov NIL2 12WV	12	2018-03-25	4	2018-03-14	11	11	2	8	10	8	18
10	60	LN12	Lov NIL2	Lov NIL2 12WV	12	2018-03-26	1	2018-03-14	12	12	4	4	8	4	12
10	60	LN12	Lov NIL2	Lov NIL2 12WV	12	2018-03-26	2	2018-03-14	12	12	*	6	6	6	12
4	22	Lov-1	Löv-1	Löv-1 NV	0	dnf	1	2018-03-14		100				0	0
4	22	L00	Löv-1	Löv-1 NV	0	dnf	2	2018-03-14		100				0	0
4	22	L00	Löv-1	Löv-1 NV	0	dnf	3	2018-03-14		100				0	0
4	22	L00	Löv-1	Löv-1 NV	0	dnf	4	2018-03-14		100				0	0
8	48	L00	Löv-1	Löv-1 NV	0	dnf	1	2018-03-14		100				0	0
8	48	L00	Löv-1	Löv-1 NV	0	dnf	2	2018-03-14		100				0	0
8	48	L00	Löv-1	Löv-1 NV	0	dnf	3	2018-03-14		100				0	0
8	48	L00	Löv-1	Löv-1 NV	0	dnf	4	2018-03-14		100				0	0
3	16	L04	Löv-1	Löv-1 4WV	4	dnf	1	2018-03-14		100				0	0
3	16	L04	Löv-1	Löv-1 4WV	4	dnf	2	2018-03-14		100				0	0
3	16	L04	Löv-1	Löv-1 4WV	4	dnf	3	2018-03-14		100				0	0
3	16	L04	Löv-1	Löv-1 4WV	4	dnf	4	2018-03-14		100				0	0
9	52	L04	Löv-1	Löv-1 4WV	4	dnf	1	2018-03-14		100				0	0
9	52	L04	Löv-1	Löv-1 4WV	4	dnf	2	2018-03-14		100				0	0
9	52	L04	Löv-1	Löv-1 4WV	4	dnf	3	2018-03-14		100				0	0
9	52	L04	Löv-1	Löv-1 4WV	4	dnf	4	2018-03-14		100				0	0
3	14	L06	Löv-1	Löv-1 6WV	6	2018-05-27	2	2018-03-14	74	74	0	0	0	0	0
3	14	L06	Löv-1	Löv-1 6WV	6	dnf	1	2018-03-14		100				0	0
3	14	L06	Löv-1	Löv-1 6WV	6	dnf	3	2018-03-14		100				0	0
3	14	L06	Löv-1	Löv-1 6WV	6	dnf	4	2018-03-14		100				0	0
5	28	L06	Löv-1	Löv-1 6WV	6	dnf	1	2018-03-14		100				0	0
5	28	L06	Löv-1	Löv-1 6WV	6	dnf	2	2018-03-14		100				0	0
5	28	L06	Löv-1	Löv-1 6WV	6	dnf	3	2018-03-14		100				0	0
5	28	L06	Löv-1	Löv-1 6WV	6	dnf	4	2018-03-14		100				0	0
12	72	L08	Löv-1	Löv-1 8WV	8	2018-04-17	1	2018-03-14	34	34	0	0	0	0	0
12	67	L08	Löv-1	Löv-1 8WV	8	2018-04-17	3	2018-03-14	34	34	8	0	8	0	8
12	72	L08	Löv-1	Löv-1 8WV	8	2018-04-17	4	2018-03-14	34	34	9	0	9	0	9
12	72	L08	Löv-1	Löv-1 8WV	8	2018-04-19	2	2018-03-14	36	36	0	0	0	0	0
12	67	L08	Löv-1	Löv-1 8WV	8	2018-04-19	4	2018-03-14	36	36	9	0	9	0	9
12	72	L08	Löv-1	Löv-1 8WV	8	2018-04-20	3	2018-03-14	37	37	4	0	4	0	4
12	67	L08	Löv-1	Löv-1 8WV	8	dnf	1	2018-03-14		100				0	0
12	67	L08	Löv-1	Löv-1 8WV	8	dnf	2	2018-03-14		100				0	0
6	33	L12	Löv-1	Löv-1 12WV	12	2018-04-02	2	2018-03-14	19	19	4	1	5	1	6
6	33	L12	Löv-1	Löv-1 12WV	12	2018-04-03	1	2018-03-14	20	20	6	6	12	6	18
6	33	L12	Löv-1	Löv-1 12WV	12	2018-04-04	3	2018-03-14	21	21	8	6	14	6	20
6	33	L12	Löv-1	Löv-1 12WV	12	2018-04-05	4	2018-03-14	22	22	8	7	15	7	22
10	59	L12	Löv-1	Löv-1 12WV	12	2018-04-03	1	2018-03-14	20	20	4	10	14	10	24
10	59	L12	Löv-1	Löv-1 12WV	12	2018-04-03	2	2018-03-14	20	20	*	5	5	5	10
10	59	L12	Löv-1	Löv-1 12WV	12	2018-04-03	3	2018-03-14	20	20	*	6	6	6	12
10	59	L12	Löv-1	Löv-1 12WV	12	2018-04-03	4	2018-03-14	20	20	3	8	11	8	19
6	36	VN00	Var NIL	Var NIL NV	0	dnf	1	2018-03-14		100				0	0
6	36	VN00	Var NIL	Var NIL NV	0	dnf	2	2018-03-14		100				0	0
6	36	VN00	Var NIL	Var NIL NV	0	dnf	3	2018-03-14		100				0	0
6	36	VN00	Var NIL	Var NIL NV	0	dnf	4	2018-03-14		100				0	0
7	37	VN00	Var NIL	Var NIL NV	0	dnf	1	2018-03-14		100				0	0
7	37	VN00	Var NIL	Var NIL NV	0	dnf	2	2018-03-14		100				0	0
7	37	VN00	Var NIL	Var NIL NV	0	dnf	3	2018-03-14		100				0	0
7	37	VN00	Var NIL	Var NIL NV	0	dnf	4	2018-03-14		100				0	0
2	10	VN04	Var NIL	Var NIL 4WV	4	2018-04-11	4	2018-03-14	28	28	5	3	8	3	11
2	10	VN04	Var NIL	Var NIL 4WV	4	2018-04-15	3	2018-03-14	32	32	7	2	9	2	11
2	10	VN04	Var NIL	Var NIL 4WV	4	2018-04-19	1	2018-03-14	36	36	7	2	9	2	11
2	10	VN04	Var NIL	Var NIL 4WV	4	2018-04-19	2	2018-03-14	36	36	5	4	9	4	13
3	18	VN04	Var NIL	Var NIL 4WV	4	2018-04-15	2	2018-03-14	32	32	7	4	11	4	15
3	18	VN04	Var NIL	Var NIL 4WV	4	2018-04-17	3	2018-03-14	34	34	6	1	7	1	8
3	18	VN04	Var NIL	Var NIL 4WV	4	2018-04-19	1	2018-03-14	36	36	7	1	8	1	9
3	18	VN04	Var NIL	Var NIL 4WV	4	2018-04-23	4	2018-03-14	40	40	8	4	12	4	16
1	1	VN06	Var NIL	Var NIL 6WV	6	2018-04-03	1	2018-03-14	20	20	5	5	10	5	15
1	5	VN06	Var NIL	Var NIL 6WV	6	2018-04-04	4	2018-03-14	21	21	6	5	11	5	16
1	5	VN06	Var NIL	Var NIL 6WV	6	2018-04-05	1	2018-03-14	22	22	5	4	9	4	13
1	1	VN06	Var NIL	Var NIL 6WV	6	2018-04-05	2	2018-03-14	22	22	4	6	10	6	16
1	1	VN06	Var NIL	Var NIL 6WV	6	2018-04-05	3	2018-03-14	22	22	4	6	10	6	16
1	5	VN06	Var NIL	Var NIL 6WV	6	2018-04-05	3	2018-03-14	22	22	4	7	11	7	18
1	1	VN06	Var NIL	Var NIL 6WV	6	2018-04-05	4	2018-03-14	22	22	5	5	10	5	15
1	5	VN06	Var NIL	Var NIL 6WV	6	2018-04-07	2	2018-03-14	24	24	3	5	8	5	13
6	34	VN08	Var NIL	Var NIL 8WV	8	2018-03-28	1	2018-03-14	14	14	6	5	11	5	16
6	34	VN08	Var NIL	Var NIL 8WV	8	2018-03-28	2	2018-03-14	14	14	3	8	11	8	19
6	34	VN08	Var NIL	Var NIL 8WV	8	2018-03-28	3	2018-03-14	14	14	6	5	11	5	16
6	34	VN08	Var NIL	Var NIL 8WV	8	2018-03-28	4	2018-03-14	14	14	5	5	10	5	15
8	46	VN08	Var NIL	Var NIL 8WV	8	2018-03-28	1	2018-03-14	14	14	5	6	11	6	17
8	46	VN08	Var NIL	Var NIL 8WV	8	2018-03-28	2	2018-03-14	14	14	6	7	13	7	20
8	46	VN08	Var NIL	Var NIL 8WV	8	2018-03-28	3	2018-03-14	14	14	4	5	9	5	14
8	46	VN08	Var NIL	Var NIL 8WV	8	2018-03-28	4	2018-03-14	14	14	5	8	13	8	21
8	45	VN12	Var NIL	Var NIL 12WV	12	2018-03-25	1	2018-03-14	11	11	2	10	12	10	22
8	45	VN12	Var NIL	Var NIL 12WV	12	2018-03-25	2	2018-03-14	11	11	3	8	11	8	19
8	45	VN12	Var NIL	Var NIL 12WV	12	2018-03-25	3	2018-03-14	11	11	4	11	15	11	26
8	45	VN12	Var NIL	Var NIL 12WV	12	2018-03-25	4	2018-03-14	11	11	2	8	10	8	18
9	54	VN12	Var NIL	Var NIL 12WV	12	2018-03-25	1	2018-03-14	11	11	4	7	11	7	18
9	54	VN12	Var NIL	Var NIL 12WV	12	2018-03-25	2	2018-03-14	11	11	4	8	12	8	20
9	54	VN12	Var NIL	Var NIL 12WV	12	2018-03-25	3	2018-03-14	11	11	3	8	11	8	19
9	54	VN12	Var NIL	Var NIL 12WV	12	2018-03-25	4	2018-03-14	11	11	10	3	13	3	16
1	6	V00	Var2-6	Var2-6 NV	0	dnf	1	2018-03-14		100				0	0
1	6	V00	Var2-6	Var2-6 NV	0	dnf	2	2018-03-14		100				0	0
1	6	V00	Var2-6	Var2-6 NV	0	dnf	3	2018-03-14		100				0	0
1	6	V00	Var2-6	Var2-6 NV	0	dnf	4	2018-03-14		100				0	0
9	53	V00	Var2-6	Var2-6 NV	0	dnf	1	2018-03-14		100				0	0
9	53	V00	Var2-6	Var2-6 NV	0	dnf	2	2018-03-14		100				0	0
9	53	V00	Var2-6	Var2-6 NV	0	dnf	3	2018-03-14		100				0	0
9	53	V00	Var2-6	Var2-6 NV	0	dnf	4	2018-03-14		100				0	0
4	19	V04	Var2-6	Var2-6 4WV	4	2018-04-20	4	2018-03-14	37	37	1	0	1	0	1
4	19	V04	Var2-6	Var2-6 4WV	4	2018-05-15	3	2018-03-14	62	62	0	0	0	0	0
4	19	V04	Var2-6	Var2-6 4WV	4	2018-05-17	2	2018-03-14	64	64	1	0	1	0	1
4	19	V04	Var2-6	Var2-6 4WV	4	dnf	1	2018-03-14		100				0	0
9	51	V04	Var2-6	Var2-6 4WV	4	2018-06-02	1	2018-03-14	80	80	0	0	0	0	0
9	51	V04	Var2-6	Var2-6 4WV	4	2018-06-09	2	2018-03-14	87	87	4	0	4	0	4
9	51	V04	Var2-6	Var2-6 4WV	4	2018-06-16	3	2018-03-14	94	94	0	0	0	0	0
9	51	V04	Var2-6	Var2-6 4WV	4	2018-06-22	4	2018-03-14	100	100	0	0	0	0	0
5	25	V06	Var2-6	Var2-6 6WV	6	2018-04-05	2	2018-03-14	22	22	2	0	2	0	2
5	25	V06	Var2-6	Var2-6 6WV	6	2018-05-15	1	2018-03-14	62	62	0	0	0	0	0
5	25	V06	Var2-6	Var2-6 6WV	6	2018-05-15	3	2018-03-14	62	62	0	0	0	0	0
5	25	V06	Var2-6	Var2-6 6WV	6	2018-05-15	4	2018-03-14	62	62	0	0	0	0	0
12	69	V06	Var2-6	Var2-6 6WV	6	2018-05-05	3	2018-03-14	52	52	9	0	9	0	9
12	69	V06	Var2-6	Var2-6 6WV	6	2018-05-07	2	2018-03-14	54	54	7	0	7	0	7
12	69	V06	Var2-6	Var2-6 6WV	6	2018-05-09	1	2018-03-14	56	56	8	0	8	0	8
12	69	V06	Var2-6	Var2-6 6WV	6	2018-05-09	4	2018-03-14	56	56	5	0	5	0	5
2	11	V08	Var2-6	Var2-6 8WV	8	2018-04-18	3	2018-03-14	35	35	6	0	6	0	6
2	11	V08	Var2-6	Var2-6 8WV	8	2018-04-19	2	2018-03-14	36	36	5	1	6	1	7
2	11	V08	Var2-6	Var2-6 8WV	8	2018-04-19	4	2018-03-14	36	36	5	2	7	2	9
2	11	V08	Var2-6	Var2-6 8WV	8	missing	1	2018-03-14			5	4	9	4	13
3	13	V08	Var2-6	Var2-6 8WV	8	2018-05-25	1	2018-03-14	72	72	4	2	6	2	8
3	13	V08	Var2-6	Var2-6 8WV	8	2018-05-27	2	2018-03-14	74	74	4	2	6	2	8
3	13	V08	Var2-6	Var2-6 8WV	8	2018-05-27	3	2018-03-14	74	74	5	2	7	2	9
3	13	V08	Var2-6	Var2-6 8WV	8	2018-05-27	4	2018-03-14	74	74	4	1	5	1	6
9	50	V12	Var2-6	Var2-6 12WV	12	2018-04-04	1	2018-03-14	21	21	2	5	7	5	12
9	50	V12	Var2-6	Var2-6 12WV	12	2018-04-04	2	2018-03-14	21	21	3	5	8	5	13
9	50	V12	Var2-6	Var2-6 12WV	12	2018-04-04	3	2018-03-14	21	21	3	5	8	5	13
9	50	V12	Var2-6	Var2-6 12WV	12	2018-04-04	4	2018-03-14	21	21	3	5	8	5	13
10	57	V12	Var2-6	Var2-6 12WV	12	2018-04-05	1	2018-03-14	22	22	3	4	7	4	11
10	57	V12	Var2-6	Var2-6 12WV	12	2018-04-05	2	2018-03-14	22	22	3	4	7	4	11
10	57	V12	Var2-6	Var2-6 12WV	12	2018-04-05	3	2018-03-14	22	22	3	5	8	5	13
10	57	V12	Var2-6	Var2-6 12WV	12	2018-04-05	4	2018-03-14	22	22	4	2	6	2	8
