# Supplementary material for: Natural variation in autumn expression is the major adaptive determinant distinguishing Arabidopsis FLC haplotypes
Source: eLife. 2020 Sep 9;9:e57671. doi: 10.7554/eLife.57671 (PMC7518893; doi:10.7554/eLife.57671)
Supplement: Supplementary file 1. [file elife-57671-supp1.xlsx]

## Sheet: Statistics for Fig. 2, 3 and 4.
Site	Year	Planting	Feature	Genotype	Estimate	Std. Error	t-value	p-value	Sig
North Sweden	2014	Early	Combined slope	Bro1-6	-6.50307e-05	0.00455412	-0.0142796	0.988611
North Sweden	2014	Early	Combined slope	Col-0	-0.0026377	0.00445871	-0.591582	0.554321
North Sweden	2014	Early	Combined slope	Edi-0	0.00450864	0.00461744	0.976437	0.329184
North Sweden	2014	Early	Combined slope	Lov-1	-0.00724552	0.00451864	-1.60348	0.10928
North Sweden	2014	Early	Combined slope	NIL2	0.00211312	0.004585	0.460878	0.645029
North Sweden	2014	Early	Combined slope	NIL1	0.00017809	0.0044825	0.03973	0.96832
North Sweden	2014	Early	Combined slope	Ull2-5	0.00178277	0.00448194	0.397768	0.690922
North Sweden	2014	Early	Combined slope	Var2-6	0.00545295	0.00450727	1.20981	0.226758
North Sweden	2014	Early	Starting	Bro1-6	2.24523	0.55021	4.08069	0.00128283	*
North Sweden	2014	Early	Starting	Col-0	-1.64656	0.55021	-2.9926	0.0282805	*
North Sweden	2014	Early	Starting	Edi-0	0.316958	0.55021	0.576067	0.9942
North Sweden	2014	Early	Starting	Lov-1	1.49905	0.55021	2.72451	0.0543826
North Sweden	2014	Early	Starting	NIL2	0.76398	0.55021	1.38852	0.628586
North Sweden	2014	Early	Starting	NIL1	1.19768	0.55021	2.17677	0.179148
North Sweden	2014	Early	Starting	Ull2-5	1.08898	0.55021	1.97921	0.259869
North Sweden	2014	Early	Starting	Var2-6	6.52501	0.55021	11.8591	3.33e-16	*
North Sweden	2014	Late	Combined slope	Bro1-6	-0.0109086	0.0042387	-2.57356	0.0103109	*
North Sweden	2014	Late	Combined slope	Col-0	-0.00754712	0.00417876	-1.80607	0.0714191
North Sweden	2014	Late	Combined slope	Edi-0	-0.00560264	0.0041838	-1.33913	0.181048
North Sweden	2014	Late	Combined slope	Lov-1	-0.0141316	0.00431991	-3.27127	0.00113329	*
North Sweden	2014	Late	Combined slope	NIL2	-0.00325849	0.00430234	-0.757376	0.449136
North Sweden	2014	Late	Combined slope	NIL1	-0.00521233	0.00421474	-1.23669	0.216696
North Sweden	2014	Late	Combined slope	Ull2-5	-0.00829765	0.00423721	-1.95828	0.0506752
North Sweden	2014	Late	Combined slope	Var2-6	-0.00443762	0.00421224	-1.05351	0.292545
North Sweden	2014	Late	Starting	Bro1-6	0.932629	0.428109	2.17849	0.18171
North Sweden	2014	Late	Starting	Col-0	-0.554096	0.428109	-1.29429	0.702642
North Sweden	2014	Late	Starting	Edi-0	0.142184	0.428109	0.332121	0.999882
North Sweden	2014	Late	Starting	Lov-1	0.819841	0.428109	1.91503	0.295317
North Sweden	2014	Late	Starting	NIL2	0.306021	0.449004	0.681555	0.984344
North Sweden	2014	Late	Starting	NIL1	0.776086	0.428109	1.81282	0.350678
North Sweden	2014	Late	Starting	Ull2-5	1.37532	0.449004	3.06304	0.0243146	*
North Sweden	2014	Late	Starting	Var2-6	2.26146	0.428109	5.28245	2.21e-05	*
Norwich	2014	Accessions	V-indep slope	Bro1-6	0.00921725	0.0106315	0.866977	0.386735
Norwich	2014	Accessions	V-indep slope	Col-0	-0.0525268	0.0112465	-4.67052	4.76908e-06	*
Norwich	2014	Accessions	V-indep slope	Edi-0	0.00691028	0.0113847	0.606978	0.544382
Norwich	2014	Accessions	V-indep slope	EDIN	0.00613392	0.0109013	0.56268	0.574126
Norwich	2014	Accessions	V-indep slope	Lov-1	0.00111251	0.0109541	0.101561	0.919181
Norwich	2014	Accessions	V-indep slope	NIL1	-0.00194129	0.0109767	-0.176856	0.859756
Norwich	2014	Accessions	V-indep slope	NIL2	0.0140895	0.0109498	1.28673	0.199305
Norwich	2014	Accessions	V-indep slope	Ull2-5	0.0306841	0.0105615	2.90528	0.00397693	*
Norwich	2014	Accessions	V-indep slope	Var2-6	0.0157752	0.0102898	1.5331	0.126439
Norwich	2014	Accessions	V-indep slope	VARN	0.017149	0.0107882	1.58961	0.113107
Norwich	2014	Accessions	V-dep slope	Bro1-6	0.00315881	0.00490608	0.643856	0.52008
Norwich	2014	Accessions	V-dep slope	Col-0	0.038909	0.00495612	7.8507	4.8167e-14	*
Norwich	2014	Accessions	V-dep slope	Edi-0	-0.0036976	0.00473694	-0.780589	0.435559
Norwich	2014	Accessions	V-dep slope	EDIN	0.000539042	0.00468349	0.115094	0.908435
Norwich	2014	Accessions	V-dep slope	Lov-1	0.00918737	0.00466237	1.97053	0.0495452	*
Norwich	2014	Accessions	V-dep slope	NIL1	-0.00212208	0.00499883	-0.424515	0.671445
Norwich	2014	Accessions	V-dep slope	NIL2	-0.00167216	0.00468349	-0.357033	0.721277
Norwich	2014	Accessions	V-dep slope	Ull2-5	0.0109687	0.00466361	2.35197	0.0192138	*
Norwich	2014	Accessions	V-dep slope	Var2-6	0.0188224	0.0046638	4.03584	6.65224e-05	*
Norwich	2014	Accessions	V-dep slope	VARN	-0.0046885	0.00515186	-0.91006	0.363401
Norwich	2014	Accessions	Starting	Bro1-6	1.11241	1.09154	1.01911	0.881393
Norwich	2014	Accessions	Starting	Col-0	-2.15733	1.22038	-1.76775	0.382676
Norwich	2014	Accessions	Starting	Edi-0	-0.621071	1.14156	-0.544053	0.997599
Norwich	2014	Accessions	Starting	EDIN	-0.671002	1.22038	-0.549829	0.9974
Norwich	2014	Accessions	Starting	Lov-1	0.533743	1.09154	0.48898	0.998967
Norwich	2014	Accessions	Starting	NIL1	0.681453	1.14156	0.596947	0.995184
Norwich	2014	Accessions	Starting	NIL2	0.830189	1.09154	0.760564	0.975183
Norwich	2014	Accessions	Starting	Ull2-5	-0.410428	1.09154	-0.376007	0.999888
Norwich	2014	Accessions	Starting	Var2-6	2.77348	1.09154	2.54088	0.092356
Norwich	2014	Accessions	Starting	VARN	1.11221	1.14156	0.974283	0.903704
Norwich	2014	Mutants	V-indep slope	Col-0	-0.0525926	0.0111586	-4.71319	4.20478e-06	*
Norwich	2014	Mutants	V-indep slope	FCA	0.000428995	0.0103791	0.0413325	0.967066
Norwich	2014	Mutants	V-indep slope	FLD	-0.000321831	0.0114687	-0.0280617	0.977637
Norwich	2014	Mutants	V-indep slope	FVE	0.0089555	0.0107916	0.829858	0.407472
Norwich	2014	Mutants	V-indep slope	NDX	-0.00220883	0.0104753	-0.210861	0.833181
Norwich	2014	Mutants	V-indep slope	VIN3	0.0022206	0.0104028	0.213462	0.831154
Norwich	2014	Mutants	V-indep slope	VRN1	0.0206511	0.0104286	1.98023	0.0488572	*
Norwich	2014	Mutants	V-indep slope	VRN2	0.0211683	0.0111606	1.89671	0.0591071
Norwich	2014	Mutants	V-dep slope	Col-0	0.0392692	0.00491948	7.98239	2.49704e-14	*
Norwich	2014	Mutants	V-dep slope	FCA	-0.00568747	0.00464749	-1.22377	0.221925
Norwich	2014	Mutants	V-dep slope	FLD	-0.00362101	0.00501783	-0.721629	0.471042
Norwich	2014	Mutants	V-dep slope	FVE	-0.00374086	0.00474315	-0.788686	0.430871
Norwich	2014	Mutants	V-dep slope	NDX	0.00490326	0.00462649	1.05982	0.290014
Norwich	2014	Mutants	V-dep slope	VIN3	0.0568239	0.00353485	16.0753	3.32808e-43	*
Norwich	2014	Mutants	V-dep slope	VRN1	0.0507734	0.00467549	10.8595	1.21638e-23	*
Norwich	2014	Mutants	V-dep slope	VRN2	0.0505143	0.00492001	10.2671	1.32858e-21	*
Norwich	2014	Mutants	Starting	Col-0	-2.15733	0.653544	-3.30097	0.0153967	*
Norwich	2014	Mutants	Starting	FCA	-0.926052	0.611334	-1.51481	0.502663
Norwich	2014	Mutants	Starting	FLD	-1.38294	0.611334	-2.26217	0.147921
Norwich	2014	Mutants	Starting	FVE	-1.6703	0.584547	-2.85743	0.0428243	*
Norwich	2014	Mutants	Starting	NDX	-0.655975	0.584547	-1.12219	0.775211
Norwich	2014	Mutants	Starting	VIN3	0.0783211	0.653544	0.119841	1
Norwich	2014	Mutants	Starting	VRN1	-1.25912	0.584547	-2.15402	0.181027
Norwich	2014	Mutants	Starting	VRN2	-0.780732	0.584547	-1.33562	0.626592
South Sweden	2014		Combined slope	Bro1-6	-0.00177676	0.00356602	-0.498248	0.618488
South Sweden	2014		Combined slope	Col-0	0.005062	0.00362423	1.39671	0.163007
South Sweden	2014		Combined slope	Edi-0	-0.00640437	0.00372593	-1.71886	0.0861455
South Sweden	2014		Combined slope	Lov-1	4.27518e-05	0.00383435	0.0111497	0.991108
South Sweden	2014		Combined slope	NIL2	0.00625811	0.00375971	1.66452	0.0965209
South Sweden	2014		Combined slope	NIL1	0.000484258	0.00371887	0.130216	0.896438
South Sweden	2014		Combined slope	Ull2-5	0.00247903	0.00376776	0.657958	0.510813
South Sweden	2014		Combined slope	Var2-6	0.00287914	0.00358502	0.803103	0.422227
South Sweden	2014		Starting	Bro1-6	1.75163	0.896099	1.95472	0.286752
South Sweden	2014		Starting	Col-0	-1.27017	1.00187	-1.2678	0.73522
South Sweden	2014		Starting	Edi-0	1.27191	0.896099	1.41939	0.627531
South Sweden	2014		Starting	Lov-1	-0.152662	0.939837	-0.162435	1
South Sweden	2014		Starting	NIL2	-0.427152	1.00187	-0.426356	0.999365
South Sweden	2014		Starting	NIL1	0.0509539	0.939837	0.0542157	1
South Sweden	2014		Starting	Ull2-5	3.28407	0.939837	3.4943	0.00839897	*
South Sweden	2014		Starting	Var2-6	5.05994	0.896099	5.64663	1.13e-05	*
North Sweden	2016		V-indep slope	Bro1-6	-0.0084134	0.0103383	-0.813805	0.416746
North Sweden	2016		V-indep slope	Edi-0	0.00162287	0.0105603	0.153677	0.878036
North Sweden	2016		V-indep slope	EDIN	-0.0131802	0.0105848	-1.2452	0.214549
North Sweden	2016		V-indep slope	Lov-1	-0.00153572	0.0108175	-0.141966	0.887252
North Sweden	2016		V-indep slope	NIL2	0.00202259	0.0105495	0.191724	0.848158
North Sweden	2016		V-indep slope	Ull2-5	-0.00350903	0.0111318	-0.315225	0.752931
North Sweden	2016		V-indep slope	ULLN	-0.00297089	0.0102962	-0.288541	0.773239
North Sweden	2016		V-indep slope	Var2-6	0.00706341	0.0105326	0.670625	0.503253
North Sweden	2016		V-indep slope	VARN	-0.00270483	0.0105521	-0.256331	0.797964
North Sweden	2016		V-indep slope	VIN3-1	0.0197108	0.0103303	1.90806	0.0578514
North Sweden	2016		V-dep slope	Bro1-6	0.0027142	0.00709655	0.382467	0.702517
North Sweden	2016		V-dep slope	Edi-0	0.00880653	0.00728773	1.20841	0.228308
North Sweden	2016		V-dep slope	EDIN	-0.00043352	0.00726094	-0.0597058	0.952449
North Sweden	2016		V-dep slope	Lov-1	-0.00511591	0.00709688	-0.720868	0.471825
North Sweden	2016		V-dep slope	NIL2	0.00812284	0.00707771	1.14767	0.252469
North Sweden	2016		V-dep slope	Ull2-5	0.0117704	0.00729308	1.61391	0.108112
North Sweden	2016		V-dep slope	ULLN	0.00522447	0.00709314	0.736552	0.462255
North Sweden	2016		V-dep slope	Var2-6	0.0101088	0.00710318	1.42314	0.156241
North Sweden	2016		V-dep slope	VARN	-0.000355519	0.00708469	-0.0501812	0.960028
North Sweden	2016		V-dep slope	VIN3-1	0.0255544	0.00632721	4.03881	7.63918e-05	*
North Sweden	2016		Starting	Bro1-6	2.53996	0.710768	3.57353	0.00615903	*
North Sweden	2016		Starting	Edi-0	0.538008	0.710768	0.756938	0.977333
North Sweden	2016		Starting	EDIN	-0.16134	0.710768	-0.226994	0.999999
North Sweden	2016		Starting	Lov-1	2.79581	0.738652	3.78502	0.00336836	*
North Sweden	2016		Starting	NIL2	0.534177	0.710768	0.751549	0.978358
North Sweden	2016		Starting	Ull2-5	1.41856	0.778608	1.82192	0.346823
North Sweden	2016		Starting	ULLN	0.425366	0.710768	0.598459	0.995529
North Sweden	2016		Starting	Var2-6	2.46306	0.710768	3.46534	0.00838114	*
North Sweden	2016		Starting	VARN	2.01944	0.710768	2.84121	0.0430423	*
North Sweden	2016		Starting	VIN3-1	-0.729764	0.738652	-0.987967	0.899863
Norwich	2016	Accessions	V-indep slope	Bro1-6	0.00441849	0.00803216	0.5501	0.582817
Norwich	2016	Accessions	V-indep slope	BRON	0.0111334	0.00803216	1.3861	0.167139
Norwich	2016	Accessions	V-indep slope	Col-0	-0.0629462	0.00779187	-8.07845	4.58067e-14	*
Norwich	2016	Accessions	V-indep slope	Edi-0	0.026813	0.00779187	3.44115	0.0006952	*
Norwich	2016	Accessions	V-indep slope	EDIN	0.00527647	0.00802935	0.657148	0.511783
Norwich	2016	Accessions	V-indep slope	Lov-1	0.0119111	0.00804917	1.47979	0.140386
Norwich	2016	Accessions	V-indep slope	NIL1	0.015876	0.00834815	1.90173	0.0585349
Norwich	2016	Accessions	V-indep slope	NIL2	0.0202636	0.00803297	2.52255	0.0123712	*
Norwich	2016	Accessions	V-indep slope	Ull2-5	0.0275775	0.00802935	3.43459	0.000710999	*
Norwich	2016	Accessions	V-indep slope	ULLN	0.0079712	0.00881549	0.904226	0.366875
Norwich	2016	Accessions	V-indep slope	Var2-6	0.0299159	0.00802935	3.72582	0.000248352	*
Norwich	2016	Accessions	V-indep slope	VARN	0.00824264	0.00908899	0.906881	0.365478
Norwich	2016	Accessions	V-indep slope	VIN3-1	0.00574266	0.00803297	0.714887	0.475451
Norwich	2016	Accessions	V-dep slope	Bro1-6	0.00869311	0.00655409	1.32636	0.186519
Norwich	2016	Accessions	V-dep slope	BRON	0.00981649	0.00655409	1.49776	0.136071
Norwich	2016	Accessions	V-dep slope	Col-0	0.00516799	0.00655409	0.788514	0.431507
Norwich	2016	Accessions	V-dep slope	Edi-0	-0.0119486	0.00655409	-1.82308	0.0700692
Norwich	2016	Accessions	V-dep slope	EDIN	-0.00732806	0.00655409	-1.11809	0.265125
Norwich	2016	Accessions	V-dep slope	Lov-1	0.00504908	0.00655409	0.77037	0.442162
Norwich	2016	Accessions	V-dep slope	NIL1	0.010414	0.00655409	1.58894	0.113955
Norwich	2016	Accessions	V-dep slope	NIL2	0.00833289	0.00684068	1.21814	0.224879
Norwich	2016	Accessions	V-dep slope	Ull2-5	0.0150565	0.00655409	2.29726	0.0228376	*
Norwich	2016	Accessions	V-dep slope	ULLN	0.0042416	0.00684068	0.620055	0.536062
Norwich	2016	Accessions	V-dep slope	Var2-6	0.0278875	0.00655409	4.25497	3.46587e-05	*
Norwich	2016	Accessions	V-dep slope	VARN	0.00399152	0.00655409	0.609012	0.543339
Norwich	2016	Accessions	V-dep slope	VIN3-1	0.0421324	0.00655409	6.42841	1.28272e-09	*
Norwich	2016	Accessions	Starting	Bro1-6	2.48737	0.602781	4.12648	0.00149741	*
Norwich	2016	Accessions	Starting	BRON	1.01278	0.602781	1.68018	0.526976
Norwich	2016	Accessions	Starting	Col-0	-1.09351	0.577119	-1.89477	0.382285
Norwich	2016	Accessions	Starting	Edi-0	-0.0886461	0.577119	-0.153601	1
Norwich	2016	Accessions	Starting	EDIN	0.275479	0.602781	0.457012	0.999937
Norwich	2016	Accessions	Starting	Lov-1	0.849147	0.577119	1.47135	0.680971
Norwich	2016	Accessions	Starting	NIL1	0.786126	0.639346	1.22958	0.845044
Norwich	2016	Accessions	Starting	NIL2	0.51486	0.602781	0.854141	0.98263
Norwich	2016	Accessions	Starting	Ull2-5	0.387527	0.602781	0.642899	0.998291
Norwich	2016	Accessions	Starting	ULLN	0.379437	0.696032	0.545143	0.999634
Norwich	2016	Accessions	Starting	Var2-6	0.734032	0.602781	1.21774	0.851943
Norwich	2016	Accessions	Starting	VARN	1.46507	0.696032	2.10488	0.266433
Norwich	2016	Mutants	V-indep slope	Col-0	-0.0628269	0.00807941	-7.77617	2.66758e-13	*
Norwich	2016	Mutants	V-indep slope	SDG8	-0.0316088	0.00832574	-3.79651	0.000188773	*
Norwich	2016	Mutants	V-indep slope	FCAF	0.0110785	0.00807941	1.3712	0.171679
Norwich	2016	Mutants	V-indep slope	FLDF	-0.00419181	0.00865643	-0.484243	0.628685
Norwich	2016	Mutants	V-indep slope	FVEF	0.014223	0.00865545	1.64324	0.101731
Norwich	2016	Mutants	V-indep slope	LHP	0.00939466	0.00807941	1.16279	0.246147
Norwich	2016	Mutants	V-indep slope	NDX	0.000328524	0.00832923	0.0394423	0.968573
Norwich	2016	Mutants	V-indep slope	VAL	0.0259195	0.00860202	3.01319	0.00288127	*
Norwich	2016	Mutants	V-indep slope	VIN3	0.000550365	0.00643009	0.0855922	0.931867
Norwich	2016	Mutants	V-indep slope	VIN3-1	0.00578447	0.00832982	0.694429	0.48813
Norwich	2016	Mutants	V-indep slope	VRN2	0.0133538	0.00832982	1.60314	0.110308
Norwich	2016	Mutants	V-indep slope	VRN5	0.0211427	0.00865545	2.4427	0.0153489	*
Norwich	2016	Mutants	V-dep slope	Col-0	0.00514722	0.00698897	0.736478	0.462368
Norwich	2016	Mutants	V-dep slope	SDG8	0.0297738	0.00698897	4.26011	3.2413e-05	*
Norwich	2016	Mutants	V-dep slope	FCAF	0.00886931	0.00698897	1.26904	0.206011
Norwich	2016	Mutants	V-dep slope	FLDF	0.00462735	0.00698897	0.662093	0.508731
Norwich	2016	Mutants	V-dep slope	FVEF	0.00892664	0.00698897	1.27725	0.203107
Norwich	2016	Mutants	V-dep slope	LHP	0.0280173	0.00698897	4.00879	8.82543e-05	*
Norwich	2016	Mutants	V-dep slope	NDX	0.000683023	0.00698897	0.0977288	0.922253
Norwich	2016	Mutants	V-dep slope	VAL	0.00251596	0.00729305	0.344981	0.730498
Norwich	2016	Mutants	V-dep slope	VIN3	0.0414299	0.00327256	12.6598	6.75185e-27	*
Norwich	2016	Mutants	V-dep slope	VIN3-1	0.0421116	0.00698897	6.02544	8.85411e-09	*
Norwich	2016	Mutants	V-dep slope	VRN2	0.0319457	0.00729304	4.3803	1.97624e-05	*
Norwich	2016	Mutants	V-dep slope	VRN5	0.0413823	0.00698897	5.92108	1.5146e-08	*
Norwich	2016	Mutants	Starting	Col-0	-1.09351	0.408006	-2.68013	0.0782459
Norwich	2016	Mutants	Starting	SDG8	-1.1174	0.426148	-2.62208	0.0894741
Norwich	2016	Mutants	Starting	FCAF	0.407085	0.408006	0.997743	0.94718
Norwich	2016	Mutants	Starting	FLDF	0.613433	0.451998	1.35716	0.754015
Norwich	2016	Mutants	Starting	FVEF	0.373	0.451998	0.825225	0.985506
Norwich	2016	Mutants	Starting	LHP	-0.147209	0.408006	-0.360802	0.999994
Norwich	2016	Mutants	Starting	NDX	1.12038	0.426148	2.62909	0.0880715
Norwich	2016	Mutants	Starting	VAL	0.956998	0.426148	2.24569	0.198933
Norwich	2016	Mutants	Starting	VIN3	0.271812	0.408006	0.666196	0.997447
Norwich	2016	Mutants	Starting	VIN3-1	0.362885	0.426148	0.851547	0.981749
Norwich	2016	Mutants	Starting	VRN2	0.564453	0.426148	1.32455	0.776727
Norwich	2016	Mutants	Starting	VRN5	-0.115293	0.451998	-0.255073	1
South Sweden	2016		V-indep slope	VIN3-1	-0.00683066	0.0136612	-0.500004	0.620892
South Sweden	2016		V-dep slope	VIN3-1	0.0204777	0.00237622	8.61777	5.72706e-13	*
South Sweden	2016		Starting	VIN3-1	two sample t-test	two sample t-test	-2.93083	0.0167407	*
