# Supplementary material for: Natural variation in autumn expression is the major adaptive determinant distinguishing Arabidopsis FLC haplotypes
Source: eLife. 2020 Sep 9;9:e57671. doi: 10.7554/eLife.57671 (PMC7518893; doi:10.7554/eLife.57671)
Supplement: Supplementary file 3. [file elife-57671-supp3.xlsx]

## Sheet: Statistics for Fig. 6.
Site	Year	Planting	Feature	Experiment	Transfer	FullCode	Genotype	Estimate	StError	tvalue	pvalue	Sig
Norwich	2014	Mutants	Flowering Time	Field		DaysToBuddingN14Mut	COL	-4.92778	1.12966	-4.36219	0.000130656	*
Norwich	2014	Mutants	Flowering Time	Field		DaysToBuddingN14Mut	FCA	1.52778	1.12167	1.36205	0.644309
Norwich	2014	Mutants	Flowering Time	Field		DaysToBuddingN14Mut	FLD	5.61111	1.12167	5.00245	5.97105e-06	*
Norwich	2014	Mutants	Flowering Time	Field		DaysToBuddingN14Mut	FVE	-5.47222	1.12167	-4.87862	1.25196e-05	*
Norwich	2014	Mutants	Flowering Time	Field		DaysToBuddingN14Mut	NDX	9.08333	1.12167	8.09802	8.50431e-14	*
Norwich	2014	Mutants	Flowering Time	Field		DaysToBuddingN14Mut	VIN3	30.4722	1.12167	27.1668	0	*
Norwich	2014	Mutants	Flowering Time	Field		DaysToBuddingN14Mut	VRN1	26.1111	1.12167	23.2787	0	*
Norwich	2014	Mutants	Flowering Time	Field		DaysToBuddingN14Mut	VRN2	33.7222	1.12167	30.0642	0	*
Norwich	2014	Mutants	Rosette Branches	Field		RosetteBranchesN14Mut	COL	0.0587302	0.13196	0.445059	0.999133
Norwich	2014	Mutants	Rosette Branches	Field		RosetteBranchesN14Mut	FCA	0.111111	0.131028	0.847997	0.949299
Norwich	2014	Mutants	Rosette Branches	Field		RosetteBranchesN14Mut	FLD	0.222222	0.131028	1.69599	0.404207
Norwich	2014	Mutants	Rosette Branches	Field		RosetteBranchesN14Mut	FVE	-0.0277778	0.131028	-0.211999	0.999997
Norwich	2014	Mutants	Rosette Branches	Field		RosetteBranchesN14Mut	NDX	-0.0555556	0.131028	-0.423998	0.999387
Norwich	2014	Mutants	Rosette Branches	Field		RosetteBranchesN14Mut	VIN3	0.305556	0.131028	2.33199	0.115577
Norwich	2014	Mutants	Rosette Branches	Field		RosetteBranchesN14Mut	VRN1	0.0326797	0.132941	0.245822	0.99999
Norwich	2014	Mutants	Rosette Branches	Field		RosetteBranchesN14Mut	VRN2	0.0277778	0.131028	0.211999	0.999997
Norwich	2014	Mutants	Total Branches	Field		TotalBranchesN14Mut	COL	0.229365	0.430765	0.532459	0.996996
Norwich	2014	Mutants	Total Branches	Field		TotalBranchesN14Mut	FCA	1.13889	0.427721	2.66269	0.0507538
Norwich	2014	Mutants	Total Branches	Field		TotalBranchesN14Mut	FLD	1.08333	0.427721	2.5328	0.0708251
Norwich	2014	Mutants	Total Branches	Field		TotalBranchesN14Mut	FVE	-4.05776e-17	0.427721	-9.48692e-17	1
Norwich	2014	Mutants	Total Branches	Field		TotalBranchesN14Mut	NDX	1.30556	0.427721	3.05235	0.016523	*
Norwich	2014	Mutants	Total Branches	Field		TotalBranchesN14Mut	VIN3	1.80556	0.427721	4.22134	0.000275874	*
Norwich	2014	Mutants	Total Branches	Field		TotalBranchesN14Mut	VRN1	0.383987	0.433966	0.884833	0.936901
Norwich	2014	Mutants	Total Branches	Field		TotalBranchesN14Mut	VRN2	0.472222	0.427721	1.10404	0.827897
Norwich	2014	Accessions	Flowering Time	Field		DaysToBuddingN14Acc	BRO	11.4444	0.898125	12.7426	0	*
Norwich	2014	Accessions	Flowering Time	Field		DaysToBuddingN14Acc	COL	-4.92778	0.904517	-5.44796	1.04472e-06	*
Norwich	2014	Accessions	Flowering Time	Field		DaysToBuddingN14Acc	EDI	2.75794	0.904517	3.04907	0.0200545	*
Norwich	2014	Accessions	Flowering Time	Field		DaysToBuddingN14Acc	EDIN	3.41667	0.898125	3.80422	0.00153883	*
Norwich	2014	Accessions	Flowering Time	Field		DaysToBuddingN14Acc	LOV	7.04365	0.904517	7.78719	2.12097e-12	*
Norwich	2014	Accessions	Flowering Time	Field		DaysToBuddingN14Acc	NIL1	2.87222	0.904517	3.17542	0.0135475	*
Norwich	2014	Accessions	Flowering Time	Field		DaysToBuddingN14Acc	NIL2	-0.388889	0.898125	-0.433001	0.999864
Norwich	2014	Accessions	Flowering Time	Field		DaysToBuddingN14Acc	ULL	7.63889	0.898125	8.50537	2.77556e-15	*
Norwich	2014	Accessions	Flowering Time	Field		DaysToBuddingN14Acc	VAR	6.30556	0.898125	7.0208	6.17786e-11	*
Norwich	2014	Accessions	Flowering Time	Field		DaysToBuddingN14Acc	VARN	3.21508	0.904517	3.55447	0.00377995	*
Norwich	2014	Accessions	Rosette Branches	Field		RosetteBranchesN14Acc	BRO	0.444444	0.110501	4.0221	0.000692208	*
Norwich	2014	Accessions	Rosette Branches	Field		RosetteBranchesN14Acc	COL	0.0587302	0.111287	0.527736	0.999244
Norwich	2014	Accessions	Rosette Branches	Field		RosetteBranchesN14Acc	EDI	-0.0555556	0.111287	-0.49921	0.999528
Norwich	2014	Accessions	Rosette Branches	Field		RosetteBranchesN14Acc	EDIN	3.89837e-16	0.110501	3.52792e-15	1
Norwich	2014	Accessions	Rosette Branches	Field		RosetteBranchesN14Acc	LOV	-0.0555556	0.111287	-0.49921	0.999528
Norwich	2014	Accessions	Rosette Branches	Field		RosetteBranchesN14Acc	NIL1	0.0873016	0.111287	0.784472	0.983826
Norwich	2014	Accessions	Rosette Branches	Field		RosetteBranchesN14Acc	NIL2	-0.0555556	0.110501	-0.502763	0.999499
Norwich	2014	Accessions	Rosette Branches	Field		RosetteBranchesN14Acc	ULL	-0.0277778	0.110501	-0.251381	0.999999
Norwich	2014	Accessions	Rosette Branches	Field		RosetteBranchesN14Acc	VAR	0.0277778	0.110501	0.251381	0.999999
Norwich	2014	Accessions	Rosette Branches	Field		RosetteBranchesN14Acc	VARN	-0.0261438	0.112114	-0.23319	1
Norwich	2014	Accessions	Total Branches	Field		TotalBranchesN14Acc	BRO	1.66667	0.393808	4.23219	0.000295099	*
Norwich	2014	Accessions	Total Branches	Field		TotalBranchesN14Acc	COL	0.229365	0.396611	0.578313	0.998384
Norwich	2014	Accessions	Total Branches	Field		TotalBranchesN14Acc	EDI	0.0293651	0.396611	0.0740401	1
Norwich	2014	Accessions	Total Branches	Field		TotalBranchesN14Acc	EDIN	0.0555556	0.393808	0.141073	1
Norwich	2014	Accessions	Total Branches	Field		TotalBranchesN14Acc	LOV	0.0865079	0.396611	0.218118	1
Norwich	2014	Accessions	Total Branches	Field		TotalBranchesN14Acc	NIL1	1.68651	0.396611	4.2523	0.000247372	*
Norwich	2014	Accessions	Total Branches	Field		TotalBranchesN14Acc	NIL2	0.333333	0.393808	0.846437	0.973116
Norwich	2014	Accessions	Total Branches	Field		TotalBranchesN14Acc	ULL	-0.25	0.393808	-0.634828	0.996599
Norwich	2014	Accessions	Total Branches	Field		TotalBranchesN14Acc	VAR	-0.805556	0.393808	-2.04556	0.247099
Norwich	2014	Accessions	Total Branches	Field		TotalBranchesN14Acc	VARN	0.236928	0.399557	0.592977	0.998021
North Sweden	2014	Early	Flowering Time	Field		A14	BRO	3.94286	1.03637	3.80449	0.0012825	*
North Sweden	2014	Early	Flowering Time	Field		A14	COL	-7.65	1.02915	-7.43334	2.64155e-12	*
North Sweden	2014	Early	Flowering Time	Field		A14	EDI	-1.28571	1.03637	-1.2406	0.734327
North Sweden	2014	Early	Flowering Time	Field		A14	LOV	-2.4	1.03637	-2.31578	0.119644
North Sweden	2014	Early	Flowering Time	Field		A14	NIL1	-1.49091	1.05195	-1.41728	0.602491
North Sweden	2014	Early	Flowering Time	Field		A14	NIL2	-0.942857	1.03637	-0.90977	0.926864
North Sweden	2014	Early	Flowering Time	Field		A14	ULL	1.93333	1.02915	1.87858	0.294416
North Sweden	2014	Early	Flowering Time	Field		A14	VAR	-1.2	1.03637	-1.15789	0.79202
North Sweden	2014	Late	Flowering Time	Field		B14	BRO	6.84491	1.08918	6.28448	1.35368e-08	*
North Sweden	2014	Late	Flowering Time	Field		B14	COL	0.638462	1.09743	0.581781	0.993212
North Sweden	2014	Late	Flowering Time	Field		B14	EDI	4.15385	1.13594	3.65674	0.00224019	*
North Sweden	2014	Late	Flowering Time	Field		B14	LOV	0.493007	1.07402	0.459031	0.998613
North Sweden	2014	Late	Flowering Time	Field		B14	NIL1	-0.461538	1.09743	-0.420565	0.999251
North Sweden	2014	Late	Flowering Time	Field		B14	NIL2	0.931319	1.11547	0.834908	0.944713
North Sweden	2014	Late	Flowering Time	Field		B14	ULL	6.24434	1.06703	5.85206	1.28713e-07	*
North Sweden	2014	Late	Flowering Time	Field		B14	VAR	3.00989	1.06041	2.83843	0.0301879	*
South Sweden	2014		Flowering Time	Field		C14	BRO	10.1938	2.71952	3.74837	0.00182408	*
South Sweden	2014		Flowering Time	Field		C14	COL	-1.50727	2.53838	-0.593794	0.99423
South Sweden	2014		Flowering Time	Field		C14	EDI	8.30606	2.90759	2.85669	0.0312691	*
South Sweden	2014		Flowering Time	Field		C14	LOV	2.90909	2.61814	1.11113	0.83104
South Sweden	2014		Flowering Time	Field		C14	NIL1	5.16403	2.58952	1.9942	0.244883
South Sweden	2014		Flowering Time	Field		C14	NIL2	2.85606	2.56301	1.11434	0.829045
South Sweden	2014		Flowering Time	Field		C14	ULL	10.9156	2.96869	3.67691	0.00227023	*
South Sweden	2014		Flowering Time	Field		C14	VAR	6.40909	2.61814	2.44796	0.0913801
Norwich	2016	Mutants	Flowering Time	Transfer	1	Transfer1N16Mut	COL	-20.7576	10.6548	-1.9482	0.346954
Norwich	2016	Mutants	Flowering Time	Transfer	1	Transfer1N16Mut	EFS	-28.0076	10.6548	-2.62864	0.0827373
Norwich	2016	Mutants	Flowering Time	Transfer	1	Transfer1N16Mut	FCAF	5.15909	10.6548	0.484205	0.99995
Norwich	2016	Mutants	Flowering Time	Transfer	1	Transfer1N16Mut	flc2	-3.89091	11.1527	-0.348876	0.999999
Norwich	2016	Mutants	Flowering Time	Transfer	1	Transfer1N16Mut	FLDF	10.4091	10.6548	0.976942	0.964461
Norwich	2016	Mutants	Flowering Time	Transfer	1	Transfer1N16Mut	FVEF	14.1591	10.6548	1.3289	0.793561
Norwich	2016	Mutants	Flowering Time	Transfer	1	Transfer1N16Mut	LHP	-12.5455	10.8839	-1.15266	0.898886
Norwich	2016	Mutants	Flowering Time	Transfer	1	Transfer1N16Mut	NDX	-2.34091	10.6548	-0.219705	1
Norwich	2016	Mutants	Flowering Time	Transfer	1	Transfer1N16Mut	VAL	99.5758	11.4727	8.67939	4.18554e-14	*
Norwich	2016	Mutants	Flowering Time	Transfer	1	Transfer1N16Mut	VIN3	13.3258	10.6548	1.25068	0.844556
Norwich	2016	Mutants	Flowering Time	Transfer	1	Transfer1N16Mut	VIN3-1	16.0758	10.6548	1.50878	0.660918
Norwich	2016	Mutants	Flowering Time	Transfer	1	Transfer1N16Mut	VRN2	93.5758	11.4727	8.1564	7.61169e-13	*
Norwich	2016	Mutants	Flowering Time	Transfer	1	Transfer1N16Mut	VRN5	94.6091	11.1527	8.48306	8.04912e-14	*
Norwich	2016	Accessions	Flowering Time	Transfer	1	Transfer1N16Acc	BRO	43.3258	9.38509	4.61644	0.000108619	*
Norwich	2016	Accessions	Flowering Time	Transfer	1	Transfer1N16Acc	BRON	9.82576	9.38509	1.04695	0.932946
Norwich	2016	Accessions	Flowering Time	Transfer	1	Transfer1N16Acc	COL	-20.7576	9.38509	-2.21176	0.201958
Norwich	2016	Accessions	Flowering Time	Transfer	1	Transfer1N16Acc	EDI	-12.8409	9.38509	-1.36822	0.747197
Norwich	2016	Accessions	Flowering Time	Transfer	1	Transfer1N16Acc	EDIN	0.575758	9.38509	0.0613481	1
Norwich	2016	Accessions	Flowering Time	Transfer	1	Transfer1N16Acc	LOV	146.209	9.8237	14.8833	0	*
Norwich	2016	Accessions	Flowering Time	Transfer	1	Transfer1N16Acc	NIL1	47.3091	9.8237	4.81581	4.4349e-05	*
Norwich	2016	Accessions	Flowering Time	Transfer	1	Transfer1N16Acc	NIL2	15.1091	9.8237	1.53802	0.618986
Norwich	2016	Accessions	Flowering Time	Transfer	1	Transfer1N16Acc	ULL	35.9091	9.58695	3.74562	0.00282643	*
Norwich	2016	Accessions	Flowering Time	Transfer	1	Transfer1N16Acc	ULLN	-0.757576	9.38509	-0.0807212	1
Norwich	2016	Accessions	Flowering Time	Transfer	1	Transfer1N16Acc	VAR	128.659	10.4471	12.3153	0	*
Norwich	2016	Accessions	Flowering Time	Transfer	1	Transfer1N16Acc	VARN	14.6591	9.38509	1.56195	0.600573
Norwich	2016	Mutants	Flowering Time	Transfer	2	Transfer2N16Mut	COL	-12.45	4.25258	-2.92763	0.035948	*
Norwich	2016	Mutants	Flowering Time	Transfer	2	Transfer2N16Mut	EFS	-18.45	4.25258	-4.33854	0.000344399	*
Norwich	2016	Mutants	Flowering Time	Transfer	2	Transfer2N16Mut	FCAF	0.8	4.25258	0.188121	1
Norwich	2016	Mutants	Flowering Time	Transfer	2	Transfer2N16Mut	flc2	-10.9273	4.33956	-2.51806	0.102224
Norwich	2016	Mutants	Flowering Time	Transfer	2	Transfer2N16Mut	FLDF	3.71667	4.25258	0.873979	0.980336
Norwich	2016	Mutants	Flowering Time	Transfer	2	Transfer2N16Mut	FVEF	10.55	4.25258	2.48085	0.111416
Norwich	2016	Mutants	Flowering Time	Transfer	2	Transfer2N16Mut	LHP	-10.95	4.25258	-2.57491	0.0893623
Norwich	2016	Mutants	Flowering Time	Transfer	2	Transfer2N16Mut	NDX	-1.78333	4.25258	-0.419353	0.999986
Norwich	2016	Mutants	Flowering Time	Transfer	2	Transfer2N16Mut	VAL	23.6333	4.25258	5.55741	1.67395e-06	*
Norwich	2016	Mutants	Flowering Time	Transfer	2	Transfer2N16Mut	VIN3	11.8	4.25258	2.77478	0.0541353
Norwich	2016	Mutants	Flowering Time	Transfer	2	Transfer2N16Mut	VIN3-1	7.8	4.25258	1.83418	0.398328
Norwich	2016	Mutants	Flowering Time	Transfer	2	Transfer2N16Mut	VRN2	51.3455	4.33956	11.832	0	*
Norwich	2016	Mutants	Flowering Time	Transfer	2	Transfer2N16Mut	VRN5	35.2545	4.33956	8.124	2.26374e-13	*
Norwich	2016	Accessions	Flowering Time	Transfer	2	Transfer2N16Acc	BRO	33.8	4.08565	8.27286	2.32148e-13	*
Norwich	2016	Accessions	Flowering Time	Transfer	2	Transfer2N16Acc	BRON	7.96667	4.08565	1.94992	0.321867
Norwich	2016	Accessions	Flowering Time	Transfer	2	Transfer2N16Acc	COL	-12.45	4.08565	-3.04725	0.0250698	*
Norwich	2016	Accessions	Flowering Time	Transfer	2	Transfer2N16Acc	EDI	-3.2	4.08565	-0.78323	0.989852
Norwich	2016	Accessions	Flowering Time	Transfer	2	Transfer2N16Acc	EDIN	1.46667	4.08565	0.35898	0.999995
Norwich	2016	Accessions	Flowering Time	Transfer	2	Transfer2N16Acc	LOV	132.4	5.22638	25.333	0	*
Norwich	2016	Accessions	Flowering Time	Transfer	2	Transfer2N16Acc	NIL1	23.05	4.08565	5.6417	1.012e-06	*
Norwich	2016	Accessions	Flowering Time	Transfer	2	Transfer2N16Acc	NIL2	8.8	4.08565	2.15388	0.219561
Norwich	2016	Accessions	Flowering Time	Transfer	2	Transfer2N16Acc	ULL	49.55	4.08565	12.1278	0	*
Norwich	2016	Accessions	Flowering Time	Transfer	2	Transfer2N16Acc	ULLN	8.43636	4.16921	2.02349	0.282042
Norwich	2016	Accessions	Flowering Time	Transfer	2	Transfer2N16Acc	VAR	44.5273	4.16921	10.68	0	*
Norwich	2016	Accessions	Flowering Time	Transfer	2	Transfer2N16Acc	VARN	10.8	4.08565	2.6434	0.0737136
Norwich	2016	Mutants	Flowering Time	Transfer	3	Transfer3N16Mut	COL	-7.66667	2.38636	-3.2127	0.0167606	*
Norwich	2016	Mutants	Flowering Time	Transfer	3	Transfer3N16Mut	EFS	-18.25	2.38636	-7.64762	1.90234e-11	*
Norwich	2016	Mutants	Flowering Time	Transfer	3	Transfer3N16Mut	FCAF	-1.08333	2.38636	-0.453968	0.999978
Norwich	2016	Mutants	Flowering Time	Transfer	3	Transfer3N16Mut	flc2	-7.92424	2.44	-3.24765	0.0150703	*
Norwich	2016	Mutants	Flowering Time	Transfer	3	Transfer3N16Mut	FLDF	3.75	2.38636	1.57143	0.62039
Norwich	2016	Mutants	Flowering Time	Transfer	3	Transfer3N16Mut	FVEF	5.33333	2.38636	2.23492	0.20429
Norwich	2016	Mutants	Flowering Time	Transfer	3	Transfer3N16Mut	LHP	-5.08333	2.38636	-2.13016	0.252047
Norwich	2016	Mutants	Flowering Time	Transfer	3	Transfer3N16Mut	NDX	0.333333	2.38636	0.139683	1
Norwich	2016	Mutants	Flowering Time	Transfer	3	Transfer3N16Mut	VAL	12.5667	2.50284	5.02096	1.64544e-05	*
Norwich	2016	Mutants	Flowering Time	Transfer	3	Transfer3N16Mut	VIN3	11.5833	2.38636	4.85397	6.00628e-05	*
Norwich	2016	Mutants	Flowering Time	Transfer	3	Transfer3N16Mut	VIN3-1	10.9167	2.38636	4.5746	0.00012671	*
Norwich	2016	Mutants	Flowering Time	Transfer	3	Transfer3N16Mut	VRN2	46.0667	2.50284	18.4058	0	*
Norwich	2016	Mutants	Flowering Time	Transfer	3	Transfer3N16Mut	VRN5	25.803	2.44	10.575	0	*
Norwich	2016	Accessions	Flowering Time	Transfer	3	Transfer3N16Acc	BRO	15.8939	1.94528	8.17051	7.55618e-13	*
Norwich	2016	Accessions	Flowering Time	Transfer	3	Transfer3N16Acc	BRON	0.833333	1.90252	0.438015	0.999967
Norwich	2016	Accessions	Flowering Time	Transfer	3	Transfer3N16Acc	COL	-7.66667	1.90252	-4.02974	0.00096543	*
Norwich	2016	Accessions	Flowering Time	Transfer	3	Transfer3N16Acc	EDI	-3.75	1.90252	-1.97107	0.32184
Norwich	2016	Accessions	Flowering Time	Transfer	3	Transfer3N16Acc	EDIN	1.83333	1.90252	0.963633	0.961503
Norwich	2016	Accessions	Flowering Time	Transfer	3	Transfer3N16Acc	LOV	25	1.90252	13.1405	0	*
Norwich	2016	Accessions	Flowering Time	Transfer	3	Transfer3N16Acc	NIL1	8.41667	1.90252	4.42395	0.000213671	*
Norwich	2016	Accessions	Flowering Time	Transfer	3	Transfer3N16Acc	NIL2	2	1.90252	1.05124	0.933097
Norwich	2016	Accessions	Flowering Time	Transfer	3	Transfer3N16Acc	ULL	16.0833	1.90252	8.45369	3.40727e-13	*
Norwich	2016	Accessions	Flowering Time	Transfer	3	Transfer3N16Acc	ULLN	3.08333	1.90252	1.62066	0.559284
Norwich	2016	Accessions	Flowering Time	Transfer	3	Transfer3N16Acc	VAR	17.5303	1.94528	9.01171	2.59792e-14	*
Norwich	2016	Accessions	Flowering Time	Transfer	3	Transfer3N16Acc	VARN	4.71212	1.94528	2.42234	0.128735
Norwich	2016	Mutants	Flowering Time	Transfer	4	Transfer4N16Mut	COL	-5.25	2.58792	-2.02866	0.301892
Norwich	2016	Mutants	Flowering Time	Transfer	4	Transfer4N16Mut	EFS	-30.6667	2.58792	-11.8499	0	*
Norwich	2016	Mutants	Flowering Time	Transfer	4	Transfer4N16Mut	FCAF	1.11364	2.64608	0.420863	0.99999
Norwich	2016	Mutants	Flowering Time	Transfer	4	Transfer4N16Mut	flc2	-4.41667	2.58792	-1.70665	0.51295
Norwich	2016	Mutants	Flowering Time	Transfer	4	Transfer4N16Mut	FLDF	0.916667	2.58792	0.35421	0.999999
Norwich	2016	Mutants	Flowering Time	Transfer	4	Transfer4N16Mut	FVEF	2.33333	2.58792	0.901626	0.980981
Norwich	2016	Mutants	Flowering Time	Transfer	4	Transfer4N16Mut	LHP	-1.91667	2.58792	-0.740621	0.996371
Norwich	2016	Mutants	Flowering Time	Transfer	4	Transfer4N16Mut	NDX	1.84091	2.64608	0.695712	0.99797
Norwich	2016	Mutants	Flowering Time	Transfer	4	Transfer4N16Mut	VAL	7.33333	2.58792	2.83368	0.0491035	*
Norwich	2016	Mutants	Flowering Time	Transfer	4	Transfer4N16Mut	VIN3	14.3333	2.58792	5.53856	1.33773e-06	*
Norwich	2016	Mutants	Flowering Time	Transfer	4	Transfer4N16Mut	VIN3-1	10.8333	2.58792	4.18612	0.000561412	*
Norwich	2016	Mutants	Flowering Time	Transfer	4	Transfer4N16Mut	VRN2	31.25	2.58792	12.0753	0	*
Norwich	2016	Mutants	Flowering Time	Transfer	4	Transfer4N16Mut	VRN5	29.4167	2.58792	11.3669	0	*
Norwich	2016	Accessions	Flowering Time	Transfer	4	Transfer4N16Acc	BRO	9.5	1.10721	8.58013	7.77156e-14	*
Norwich	2016	Accessions	Flowering Time	Transfer	4	Transfer4N16Acc	BRON	1.5	1.10721	1.35476	0.75709
Norwich	2016	Accessions	Flowering Time	Transfer	4	Transfer4N16Acc	COL	-5.25	1.10721	-4.74165	6.01637e-05	*
Norwich	2016	Accessions	Flowering Time	Transfer	4	Transfer4N16Acc	EDI	-3.33333	1.10721	-3.01057	0.028292	*
Norwich	2016	Accessions	Flowering Time	Transfer	4	Transfer4N16Acc	EDIN	-2.31156e-15	1.10721	-2.08773e-15	1
Norwich	2016	Accessions	Flowering Time	Transfer	4	Transfer4N16Acc	LOV	8.41667	1.10721	7.60169	1.21196e-11	*
Norwich	2016	Accessions	Flowering Time	Transfer	4	Transfer4N16Acc	NIL1	6.41667	1.10721	5.79535	4.24329e-07	*
Norwich	2016	Accessions	Flowering Time	Transfer	4	Transfer4N16Acc	NIL2	1.25	1.10721	1.12896	0.897206
Norwich	2016	Accessions	Flowering Time	Transfer	4	Transfer4N16Acc	ULL	8.75	1.10721	7.90275	1.40499e-12	*
Norwich	2016	Accessions	Flowering Time	Transfer	4	Transfer4N16Acc	ULLN	1.08333	1.10721	0.978436	0.956323
Norwich	2016	Accessions	Flowering Time	Transfer	4	Transfer4N16Acc	VAR	8.33333	1.10721	7.52643	2.31566e-11	*
Norwich	2016	Accessions	Flowering Time	Transfer	4	Transfer4N16Acc	VARN	1.75	1.10721	1.58055	0.586175
Norwich	2016	Mutants	Flowering Time	Transfer	5	Transfer5N16Mut	COL	-3.5	1.96418	-1.78192	0.459304
Norwich	2016	Mutants	Flowering Time	Transfer	5	Transfer5N16Mut	EFS	-42.0833	1.96418	-21.4254	0	*
Norwich	2016	Mutants	Flowering Time	Transfer	5	Transfer5N16Mut	FCAF	1	1.96418	0.50912	0.999919
Norwich	2016	Mutants	Flowering Time	Transfer	5	Transfer5N16Mut	flc2	-2.56061	2.00832	-1.275	0.833103
Norwich	2016	Mutants	Flowering Time	Transfer	5	Transfer5N16Mut	FLDF	0.333333	1.96418	0.169707	1
Norwich	2016	Mutants	Flowering Time	Transfer	5	Transfer5N16Mut	FVEF	1.66667	1.96418	0.848533	0.988374
Norwich	2016	Mutants	Flowering Time	Transfer	5	Transfer5N16Mut	LHP	-0.916667	1.96418	-0.466693	0.999969
Norwich	2016	Mutants	Flowering Time	Transfer	5	Transfer5N16Mut	NDX	3.33333	1.96418	1.69707	0.521258
Norwich	2016	Mutants	Flowering Time	Transfer	5	Transfer5N16Mut	VAL	3.5	1.96418	1.78192	0.459341
Norwich	2016	Mutants	Flowering Time	Transfer	5	Transfer5N16Mut	VIN3	13.0758	2.00832	6.5108	6.34816e-09	*
Norwich	2016	Mutants	Flowering Time	Transfer	5	Transfer5N16Mut	VIN3-1	12.25	1.96418	6.23671	2.68674e-08	*
Norwich	2016	Mutants	Flowering Time	Transfer	5	Transfer5N16Mut	VRN2	29.9167	1.96418	15.2312	0	*
Norwich	2016	Mutants	Flowering Time	Transfer	5	Transfer5N16Mut	VRN5	22.0758	2.00832	10.9922	0	*
Norwich	2016	Accessions	Flowering Time	Transfer	5	Transfer5N16Acc	BRO	3.16667	2.10388	1.50516	0.646419
Norwich	2016	Accessions	Flowering Time	Transfer	5	Transfer5N16Acc	BRON	-0.166667	2.10388	-0.0792187	1
Norwich	2016	Accessions	Flowering Time	Transfer	5	Transfer5N16Acc	COL	-3.5	2.10388	-1.66359	0.525826
Norwich	2016	Accessions	Flowering Time	Transfer	5	Transfer5N16Acc	EDI	-1.75	2.10388	-0.831796	0.986524
Norwich	2016	Accessions	Flowering Time	Transfer	5	Transfer5N16Acc	EDIN	-0.0833333	2.10388	-0.0396094	1
Norwich	2016	Accessions	Flowering Time	Transfer	5	Transfer5N16Acc	LOV	3.16667	2.10388	1.50516	0.646377
Norwich	2016	Accessions	Flowering Time	Transfer	5	Transfer5N16Acc	NIL1	3.71212	2.15116	1.72563	0.480405
Norwich	2016	Accessions	Flowering Time	Transfer	5	Transfer5N16Acc	NIL2	-3.26265e-14	2.10388	-1.55078e-14	1
Norwich	2016	Accessions	Flowering Time	Transfer	5	Transfer5N16Acc	ULL	6.33333	2.10388	3.01031	0.0286451	*
Norwich	2016	Accessions	Flowering Time	Transfer	5	Transfer5N16Acc	ULLN	0.439394	2.15116	0.204259	1
Norwich	2016	Accessions	Flowering Time	Transfer	5	Transfer5N16Acc	VAR	5.41667	2.10388	2.57461	0.0899254
Norwich	2016	Accessions	Flowering Time	Transfer	5	Transfer5N16Acc	VARN	0.166667	2.10388	0.0792187	1
Norwich	2016	Mutants	Flowering Time	Transfer	6	Transfer6N16Mut	COL	-15.2727	2.98481	-5.11682	1.19801e-05	*
Norwich	2016	Mutants	Flowering Time	Transfer	6	Transfer6N16Mut	EFS	-63.3409	2.92196	-21.6775	0	*
Norwich	2016	Mutants	Flowering Time	Transfer	6	Transfer6N16Mut	FCAF	-0.727273	2.98481	-0.243658	1
Norwich	2016	Mutants	Flowering Time	Transfer	6	Transfer6N16Mut	flc2	-11.8409	2.92196	-4.05238	0.00094048	*
Norwich	2016	Mutants	Flowering Time	Transfer	6	Transfer6N16Mut	FLDF	2.74242	2.92196	0.938556	0.971649
Norwich	2016	Mutants	Flowering Time	Transfer	6	Transfer6N16Mut	FVEF	2.74242	2.92196	0.938556	0.971668
Norwich	2016	Mutants	Flowering Time	Transfer	6	Transfer6N16Mut	LHP	-5.59091	2.92196	-1.91341	0.362317
Norwich	2016	Mutants	Flowering Time	Transfer	6	Transfer6N16Mut	NDX	5.74242	2.92196	1.96526	0.330925
Norwich	2016	Mutants	Flowering Time	Transfer	6	Transfer6N16Mut	VAL	5.63636	2.98481	1.88835	0.378066
Norwich	2016	Mutants	Flowering Time	Transfer	6	Transfer6N16Mut	VIN3	16.9091	2.92196	5.7869	3.95288e-07	*
Norwich	2016	Mutants	Flowering Time	Transfer	6	Transfer6N16Mut	VIN3-1	15.7424	2.92196	5.38762	2.88157e-06	*
Norwich	2016	Mutants	Flowering Time	Transfer	6	Transfer6N16Mut	VRN2	23.0909	2.98481	7.73615	5.44964e-12	*
Norwich	2016	Mutants	Flowering Time	Transfer	6	Transfer6N16Mut	VRN5	20	2.98481	6.7006	9.593e-09	*
Norwich	2016	Accessions	Flowering Time	Transfer	6	Transfer6N16Acc	BRO	11.9091	2.56506	4.64281	0.000101476	*
Norwich	2016	Accessions	Flowering Time	Transfer	6	Transfer6N16Acc	BRON	-1.84091	2.56506	-0.717686	0.995304
Norwich	2016	Accessions	Flowering Time	Transfer	6	Transfer6N16Acc	COL	-15.2727	2.62023	-5.82877	2.91247e-07	*
Norwich	2016	Accessions	Flowering Time	Transfer	6	Transfer6N16Acc	EDI	-6.50758	2.56506	-2.537	0.095816
Norwich	2016	Accessions	Flowering Time	Transfer	6	Transfer6N16Acc	EDIN	-3.75758	2.56506	-1.46491	0.662985
Norwich	2016	Accessions	Flowering Time	Transfer	6	Transfer6N16Acc	LOV	10.4924	2.56506	4.09051	0.000761643	*
Norwich	2016	Accessions	Flowering Time	Transfer	6	Transfer6N16Acc	NIL1	3.40909	2.56506	1.32905	0.764413
Norwich	2016	Accessions	Flowering Time	Transfer	6	Transfer6N16Acc	NIL2	-3.42424	2.56506	-1.33495	0.76018
Norwich	2016	Accessions	Flowering Time	Transfer	6	Transfer6N16Acc	ULL	9.32576	2.56506	3.63568	0.00399264	*
Norwich	2016	Accessions	Flowering Time	Transfer	6	Transfer6N16Acc	ULLN	-0.840909	2.56506	-0.327832	0.999998
Norwich	2016	Accessions	Flowering Time	Transfer	6	Transfer6N16Acc	VAR	9.74242	2.56506	3.79812	0.00228423	*
Norwich	2016	Accessions	Flowering Time	Transfer	6	Transfer6N16Acc	VARN	1.45455	2.62023	0.555121	0.99955
North Sweden	2016		Flowering Time	Transfer	1	Transfer1North16	BRO	80	19.6747	4.06614	0.00134398	*
North Sweden	2016		Flowering Time	Transfer	1	Transfer1North16	COL	-3.625	10.239	-0.354038	0.999987
North Sweden	2016		Flowering Time	Transfer	1	Transfer1North16	EDI	38.6	11.3592	3.39813	0.0105943	*
North Sweden	2016		Flowering Time	Transfer	1	Transfer1North16	EDIN	2.54545	9.68714	0.262766	0.999999
North Sweden	2016		Flowering Time	Transfer	1	Transfer1North16	NIL1	29.7778	10.0178	2.97247	0.0344687	*
North Sweden	2016		Flowering Time	Transfer	1	Transfer1North16	NIL2	13.5556	10.0178	1.35314	0.73197
North Sweden	2016		Flowering Time	Transfer	1	Transfer1North16	ULL	15	13.1164	1.1436	0.866174
North Sweden	2016		Flowering Time	Transfer	1	Transfer1North16	ULLN	22.8333	10.8756	2.0995	0.24662
North Sweden	2016		Flowering Time	Transfer	1	Transfer1North16	VAR	27	13.1164	2.05848	0.266119
North Sweden	2016		Flowering Time	Transfer	1	Transfer1North16	VARN	17.8333	10.8756	1.63976	0.522298
North Sweden	2016		Flowering Time	Transfer	1	Transfer1North16	VIN3-1	-0.8	11.3592	-0.0704277	1
North Sweden	2016		Flowering Time	Transfer	2	Transfer2North16	BRO	39.7841	3.82457	10.4022	0	*
North Sweden	2016		Flowering Time	Transfer	2	Transfer2North16	COL	-1.09091	3.59633	-0.303339	0.999999
North Sweden	2016		Flowering Time	Transfer	2	Transfer2North16	EDI	8.27273	3.50966	2.35713	0.152296
North Sweden	2016		Flowering Time	Transfer	2	Transfer2North16	EDIN	5.09091	3.50966	1.45054	0.696647
North Sweden	2016		Flowering Time	Transfer	2	Transfer2North16	NIL1	1.70909	3.59633	0.475231	0.999883
North Sweden	2016		Flowering Time	Transfer	2	Transfer2North16	NIL2	7.46465	3.69951	2.01774	0.302097
North Sweden	2016		Flowering Time	Transfer	2	Transfer2North16	ULL	33.6234	3.97958	8.44897	7.64944e-13	*
North Sweden	2016		Flowering Time	Transfer	2	Transfer2North16	ULLN	2.90909	3.43577	0.846708	0.983652
North Sweden	2016		Flowering Time	Transfer	2	Transfer2North16	VAR	50.2424	5.3611	9.37167	1.9873e-14	*
North Sweden	2016		Flowering Time	Transfer	2	Transfer2North16	VARN	19.3535	3.69951	5.23138	1.0568e-05	*
North Sweden	2016		Flowering Time	Transfer	2	Transfer2North16	VIN3-1	1.00909	3.59633	0.280589	0.999999
North Sweden	2016		Flowering Time	Transfer	3	Transfer3North16	BRO	24.2525	2.30378	10.5273	0	*
North Sweden	2016		Flowering Time	Transfer	3	Transfer3North16	COL	-0.636364	2.13954	-0.297431	1
North Sweden	2016		Flowering Time	Transfer	3	Transfer3North16	EDI	1.91919	2.30378	0.833064	0.986949
North Sweden	2016		Flowering Time	Transfer	3	Transfer3North16	EDIN	2.09091	2.18555	0.956696	0.964425
North Sweden	2016		Flowering Time	Transfer	3	Transfer3North16	LOV	21.9091	2.18555	10.0245	0	*
North Sweden	2016		Flowering Time	Transfer	3	Transfer3North16	NIL1	5.56364	2.23953	2.48429	0.113614
North Sweden	2016		Flowering Time	Transfer	3	Transfer3North16	NIL2	5.72727	2.18555	2.62051	0.0822046
North Sweden	2016		Flowering Time	Transfer	3	Transfer3North16	ULL	22.1414	2.30378	9.61093	4.44089e-16	*
North Sweden	2016		Flowering Time	Transfer	3	Transfer3North16	ULLN	0.272727	2.18555	0.124786	1
North Sweden	2016		Flowering Time	Transfer	3	Transfer3North16	VAR	23.0636	2.23953	10.2984	0	*
North Sweden	2016		Flowering Time	Transfer	3	Transfer3North16	VARN	1.90909	2.18555	0.873505	0.981325
North Sweden	2016		Flowering Time	Transfer	3	Transfer3North16	VIN3-1	0.530303	2.13954	0.247859	1
North Sweden	2016		Flowering Time	Transfer	4	Transfer4North16	BRO	12.9167	1.18684	10.8832	0	*
North Sweden	2016		Flowering Time	Transfer	4	Transfer4North16	COL	-0.833333	1.21352	-0.686709	0.9975
North Sweden	2016		Flowering Time	Transfer	4	Transfer4North16	EDI	3.34848	1.21352	2.75932	0.0578272
North Sweden	2016		Flowering Time	Transfer	4	Transfer4North16	EDIN	-0.833333	1.18684	-0.702143	0.996956
North Sweden	2016		Flowering Time	Transfer	4	Transfer4North16	LOV	10.2576	1.21352	8.45276	1.43219e-13	*
North Sweden	2016		Flowering Time	Transfer	4	Transfer4North16	NIL1	2.56667	1.24477	2.06196	0.277208
North Sweden	2016		Flowering Time	Transfer	4	Transfer4North16	NIL2	0.257576	1.21352	0.212256	1
North Sweden	2016		Flowering Time	Transfer	4	Transfer4North16	ULL	10.5303	1.21352	8.67751	7.61613e-14	*
North Sweden	2016		Flowering Time	Transfer	4	Transfer4North16	ULLN	-0.287879	1.21352	-0.237227	1
North Sweden	2016		Flowering Time	Transfer	4	Transfer4North16	VAR	11.5833	1.18684	9.75978	0	*
North Sweden	2016		Flowering Time	Transfer	4	Transfer4North16	VARN	3.16667	1.18684	2.66814	0.0730128
North Sweden	2016		Flowering Time	Transfer	4	Transfer4North16	VIN3-1	-0.533333	1.24477	-0.428459	0.999976
South Sweden	2016		Flowering Time	Transfer	1	Transfer1South16	COL	-12	3.53218	-3.39733	0.0188686	*
South Sweden	2016		Flowering Time	Transfer	1	Transfer1South16	EDI	25.75	6.84005	3.76459	0.0079695	*
South Sweden	2016		Flowering Time	Transfer	1	Transfer1South16	EDIN	-1.65	4.10403	-0.402044	0.999861
South Sweden	2016		Flowering Time	Transfer	1	Transfer1South16	LOV	28.75	6.84005	4.20319	0.00275577	*
South Sweden	2016		Flowering Time	Transfer	1	Transfer1South16	NIL1	7.75	6.84005	1.13303	0.875329
South Sweden	2016		Flowering Time	Transfer	1	Transfer1South16	NIL2	9.75	4.32603	2.2538	0.212253
South Sweden	2016		Flowering Time	Transfer	1	Transfer1South16	ULLN	8.41667	4.67264	1.80127	0.444267
South Sweden	2016		Flowering Time	Transfer	1	Transfer1South16	VARN	28.75	6.84005	4.20319	0.00277478	*
South Sweden	2016		Flowering Time	Transfer	1	Transfer1South16	VIN3-1	14.75	6.84005	2.15642	0.252462
South Sweden	2016		Flowering Time	Transfer	2	Transfer2South16	BRO	16.125	5.41286	2.97902	0.0357871	*
South Sweden	2016		Flowering Time	Transfer	2	Transfer2South16	COL	-9.14773	2.3713	-3.85769	0.0024102	*
South Sweden	2016		Flowering Time	Transfer	2	Transfer2South16	EDI	3.925	2.4207	1.62143	0.597883
South Sweden	2016		Flowering Time	Transfer	2	Transfer2South16	EDIN	0.943182	2.3713	0.397749	0.999991
South Sweden	2016		Flowering Time	Transfer	2	Transfer2South16	LOV	16.125	5.41286	2.97902	0.0359119	*
South Sweden	2016		Flowering Time	Transfer	2	Transfer2South16	NIL1	14.25	2.55165	5.58463	2.79442e-06	*
South Sweden	2016		Flowering Time	Transfer	2	Transfer2South16	NIL2	3.03409	2.3713	1.27951	0.839227
South Sweden	2016		Flowering Time	Transfer	2	Transfer2South16	ULL	11.4583	2.75609	4.15746	0.000867559	*
South Sweden	2016		Flowering Time	Transfer	2	Transfer2South16	ULLN	3.70833	2.32932	1.59202	0.620089
South Sweden	2016		Flowering Time	Transfer	2	Transfer2South16	VAR	22.125	4.03451	5.48394	4.59757e-06	*
South Sweden	2016		Flowering Time	Transfer	2	Transfer2South16	VARN	4.125	2.4207	1.70405	0.536061
South Sweden	2016		Flowering Time	Transfer	2	Transfer2South16	VIN3-1	17.4583	2.75609	6.33445	8.16442e-08	*
South Sweden	2016		Flowering Time	Transfer	3	Transfer3South16	BRO	4.61667	1.00638	4.5874	0.000121473	*
South Sweden	2016		Flowering Time	Transfer	3	Transfer3South16	COL	-10.0833	0.959545	-10.5085	0	*
South Sweden	2016		Flowering Time	Transfer	3	Transfer3South16	EDI	-1.83333	0.959545	-1.91063	0.369417
South Sweden	2016		Flowering Time	Transfer	3	Transfer3South16	EDIN	-1.67424	0.98111	-1.70648	0.509739
South Sweden	2016		Flowering Time	Transfer	3	Transfer3South16	LOV	2.11667	1.00638	2.10325	0.260289
South Sweden	2016		Flowering Time	Transfer	3	Transfer3South16	NIL1	1.91667	0.959545	1.99747	0.317126
South Sweden	2016		Flowering Time	Transfer	3	Transfer3South16	NIL2	-0.492424	0.98111	-0.501905	0.999886
South Sweden	2016		Flowering Time	Transfer	3	Transfer3South16	ULL	4.75	1.03643	4.58305	0.000121553	*
South Sweden	2016		Flowering Time	Transfer	3	Transfer3South16	ULLN	-0.492424	0.98111	-0.501905	0.999886
South Sweden	2016		Flowering Time	Transfer	3	Transfer3South16	VAR	5.25	0.959545	5.47134	3.35861e-06	*
South Sweden	2016		Flowering Time	Transfer	3	Transfer3South16	VARN	-0.0833333	0.959545	-0.0868467	1
South Sweden	2016		Flowering Time	Transfer	3	Transfer3South16	VIN3-1	8.27381	1.11784	7.40163	6.24335e-11	*
South Sweden	2016		Flowering Time	Transfer	4	Transfer4South16	BRO	3.27273	1.03476	3.16279	0.0192935	*
South Sweden	2016		Flowering Time	Transfer	4	Transfer4South16	COL	-6.56364	1.06031	-6.19028	7.54359e-08	*
South Sweden	2016		Flowering Time	Transfer	4	Transfer4South16	EDI	0.272727	1.03476	0.263566	1
South Sweden	2016		Flowering Time	Transfer	4	Transfer4South16	EDIN	1.05303	1.01297	1.03954	0.94276
South Sweden	2016		Flowering Time	Transfer	4	Transfer4South16	LOV	-0.763636	1.06031	-0.720199	0.996344
South Sweden	2016		Flowering Time	Transfer	4	Transfer4South16	NIL1	1.53636	1.06031	1.44897	0.704891
South Sweden	2016		Flowering Time	Transfer	4	Transfer4South16	NIL2	-0.94697	1.01297	-0.934842	0.971617
South Sweden	2016		Flowering Time	Transfer	4	Transfer4South16	ULL	3.2197	1.01297	3.17846	0.0184731	*
South Sweden	2016		Flowering Time	Transfer	4	Transfer4South16	ULLN	0.30303	1.09073	0.277823	1
South Sweden	2016		Flowering Time	Transfer	4	Transfer4South16	VAR	2	1.03476	1.93282	0.356074
South Sweden	2016		Flowering Time	Transfer	4	Transfer4South16	VARN	-0.0909091	1.03476	-0.0878553	1
South Sweden	2016		Flowering Time	Transfer	4	Transfer4South16	VIN3-1	8.30303	1.58062	5.25302	9.96718e-06	*
Norwich	2016	Mutants	Flowering Time	Field		N16Mut	COL	-19.3551	2.7529	-7.03079	1.29667e-10	*
Norwich	2016	Mutants	Flowering Time	Field		N16Mut	EFS	-69.1051	2.7529	-25.1026	0	*
Norwich	2016	Mutants	Flowering Time	Field		N16Mut	FCAF	1.82609	2.78203	0.656386	0.998863
Norwich	2016	Mutants	Flowering Time	Field		N16Mut	flc2	-16.1581	2.81347	-5.74312	4.085e-07	*
Norwich	2016	Mutants	Flowering Time	Field		N16Mut	FLDF	6.75099	2.81347	2.39952	0.137936
Norwich	2016	Mutants	Flowering Time	Field		N16Mut	FVEF	2.10326	2.7529	0.764016	0.995252
Norwich	2016	Mutants	Flowering Time	Field		N16Mut	LHP	-3.85507	2.7529	-1.40037	0.743124
Norwich	2016	Mutants	Flowering Time	Field		N16Mut	NDX	8.52174	2.78203	3.06313	0.0239518	*
Norwich	2016	Mutants	Flowering Time	Field		N16Mut	VAL	11.3478	2.78203	4.07897	0.000691428	*
Norwich	2016	Mutants	Flowering Time	Field		N16Mut	VIN3	39.2609	2.78203	14.1123	0	*
Norwich	2016	Mutants	Flowering Time	Field		N16Mut	VIN3-1	37.1601	2.81347	13.2079	0	*
Norwich	2016	Mutants	Flowering Time	Field		N16Mut	VRN2	48.0435	2.78203	17.2692	0	*
Norwich	2016	Mutants	Flowering Time	Field		N16Mut	VRN5	43.1033	2.7529	15.6574	0	*
Norwich	2016	Accessions	Flowering Time	Field		N16Acc	BRO	22.5199	2.77416	8.11775	5.91749e-14	*
Norwich	2016	Accessions	Flowering Time	Field		N16Acc	BRON	2.10326	2.77416	0.758162	0.993317
Norwich	2016	Accessions	Flowering Time	Field		N16Acc	COL	-19.3551	2.77416	-6.97692	3.58363e-10	*
Norwich	2016	Accessions	Flowering Time	Field		N16Acc	EDI	-9.35507	2.77416	-3.37222	0.00853155	*
Norwich	2016	Accessions	Flowering Time	Field		N16Acc	EDIN	0.103261	2.77416	0.0372224	1
Norwich	2016	Accessions	Flowering Time	Field		N16Acc	LOV	12.6866	2.77416	4.57313	8.02709e-05	*
Norwich	2016	Accessions	Flowering Time	Field		N16Acc	NIL1	6.22826	2.77416	2.2451	0.182034
Norwich	2016	Accessions	Flowering Time	Field		N16Acc	NIL2	0.686594	2.77416	0.247496	1
Norwich	2016	Accessions	Flowering Time	Field		N16Acc	ULL	14.3043	2.80351	5.10229	8.72103e-06	*
Norwich	2016	Accessions	Flowering Time	Field		N16Acc	ULLN	1.08696	2.80351	0.387712	0.999991
Norwich	2016	Accessions	Flowering Time	Field		N16Acc	VAR	15.3533	2.77416	5.53439	7.9313e-07	*
Norwich	2016	Accessions	Flowering Time	Field		N16Acc	VARN	3.01993	2.77416	1.08859	0.913987
North Sweden	2016		Flowering Time	Field		North16	BRO	182.138	16.4529	11.0702	0	*
North Sweden	2016		Flowering Time	Field		North16	COL	-11.2257	14.4079	-0.779138	0.994507
North Sweden	2016		Flowering Time	Field		North16	EDI	72.7379	27.4104	2.65366	0.0757161
North Sweden	2016		Flowering Time	Field		North16	EDIN	-0.965517	14.8654	-0.0649508	1
North Sweden	2016		Flowering Time	Field		North16	LOV	171.276	14.8654	11.5218	0	*
North Sweden	2016		Flowering Time	Field		North16	NIL1	38.2808	16.2194	2.36018	0.154789
North Sweden	2016		Flowering Time	Field		North16	NIL2	34.9898	15.1381	2.31137	0.172886
North Sweden	2016		Flowering Time	Field		North16	ULL	165.638	15.6204	10.6039	0	*
North Sweden	2016		Flowering Time	Field		North16	ULLN	17.5754	14.5128	1.21103	0.879911
North Sweden	2016		Flowering Time	Field		North16	VAR	168.138	16.4529	10.2193	0	*
North Sweden	2016		Flowering Time	Field		North16	VARN	50.4879	16.4529	3.06863	0.0235145	*
North Sweden	2016		Flowering Time	Field		North16	VIN3-1	38.5379	15.4485	2.4946	0.112936
South Sweden	2016		Flowering Time	Field		South16	BRO	5.51389	1.34604	4.09638	0.000587145	*
South Sweden	2016		Flowering Time	Field		South16	COL	-6.57663	1.37753	-4.7742	3.17388e-05	*
South Sweden	2016		Flowering Time	Field		South16	EDI	0.705556	1.36642	0.516354	0.999806
South Sweden	2016		Flowering Time	Field		South16	EDIN	-0.143369	1.35594	-0.105734	1
South Sweden	2016		Flowering Time	Field		South16	LOV	2.17921	1.35594	1.60716	0.556555
South Sweden	2016		Flowering Time	Field		South16	NIL1	2.88889	1.35594	2.13054	0.22893
South Sweden	2016		Flowering Time	Field		South16	NIL2	0.561303	1.37753	0.407469	0.999984
South Sweden	2016		Flowering Time	Field		South16	ULL	0.62963	1.40192	0.449121	0.999954
South Sweden	2016		Flowering Time	Field		South16	ULLN	1.25096	1.37753	0.908114	0.972672
South Sweden	2016		Flowering Time	Field		South16	VAR	1.97817	1.38934	1.42382	0.698007
South Sweden	2016		Flowering Time	Field		South16	VARN	3.09259	1.40192	2.20597	0.196227
South Sweden	2016		Flowering Time	Field		South16	VIN3-1	29.8363	1.54244	19.3435	0	*
