# Supplementary material for: Natural variation in autumn expression is the major adaptive determinant distinguishing Arabidopsis FLC haplotypes
Source: eLife. 2020 Sep 9;9:e57671. doi: 10.7554/eLife.57671 (PMC7518893; doi:10.7554/eLife.57671)
Supplement: Supplementary file 6. [file elife-57671-supp6.xlsx]

## Sheet: Statistics for Fig. 5. combined
comparison	pvalue	a	Sig
All	1.81177e-68	0.00208333	*
compare init - early	0.00087269	0.0291667	*
compare sites	0.997369	0.05
compare slope types	4.43525e-12	0.00833333	*
compare variables	3.31497e-12	0.00625	*
compare variables 14	1.94248e-10	0.0104167	*
compare variables 16	2.03847e-05	0.01875	*
within all Norwich	6.62644e-10	0.0145833	*
within all Norwich - early-init	0.00124474	0.0333333	*
within all Norwich - early-late	5.28727e-05	0.0229167	*
within all Norwich - init-late	0.036298	0.0395833	*
within all slopes	4.3153e-39	0.00416667	*
within all Sweden	2.6147e-10	0.0125	*
within all Sweden 14	2.79018e-08	0.0166667	*
within combined slopes	0.541351	0.0479167
within early slopes	0.0593709	0.0416667
within init	0.253021	0.0458333
within late slopes	0.224313	0.04375
within North2nd	0.0279257	0.0375	*
within Norwich1st	2.1323e-05	0.0208333	*
within Norwich2nd	0.000495718	0.0270833	*
within Sweden A	0.000924478	0.03125	*
within Sweden B	0.00409274	0.0354167	*
within Sweden C	0.000252866	0.025	*

## Sheet: Accessions
comparison	pvalue	a	Sig
All	4.15327e-05	0.0125	*
compare init - early	0.00674434	0.0229167	*
compare sites	0.998102	0.05
compare slope types	6.52941e-09	0.00208333	*
compare variables	1.49206e-08	0.00416667	*
compare variables 14	6.21288e-08	0.00625	*
compare variables 16	0.00622352	0.0208333	*
within all Norwich	0.000155795	0.0145833	*
within all Norwich - early-init	0.0540626	0.03125
within all Norwich - early-late	0.0182049	0.0291667	*
within all Norwich - init-late	0.0912681	0.0333333
within all slopes	0.555782	0.0416667
within all Sweden	1.64702e-06	0.00833333	*
within all Sweden 14	3.03517e-06	0.0104167	*
within combined slopes	0.395136	0.0395833
within early slopes	0.967024	0.0479167
within init	0.847765	0.04375
within late slopes	0.288148	0.0375
within North2nd	0.230651	0.0354167
within Norwich1st	0.00431367	0.01875	*
within Norwich2nd	0.965244	0.0458333
within Sweden A	0.00772639	0.025	*
within Sweden B	0.0166141	0.0270833	*
within Sweden C	0.00145702	0.0166667	*

## Sheet: NILs
comparison	pvalue	a	Sig
All	2.81761e-12	0.00416667	*
compare init - early	0.00549488	0.0270833	*
compare sites	0.996519	0.05
compare slope types	0.000154743	0.0125	*
compare variables	2.74481e-05	0.00625	*
compare variables 14	0.000253172	0.0145833	*
compare variables 16	0.00152101	0.0229167	*
within all Norwich	6.21629e-05	0.00833333	*
within all Norwich - early-init	0.0133601	0.0291667	*
within all Norwich - early-late	0.000930582	0.0208333	*
within all Norwich - init-late	0.202529	0.0416667
within all slopes	1.26153e-12	0.00208333	*
within all Sweden	0.000617627	0.0166667	*
within all Sweden 14	0.00371468	0.025	*
within combined slopes	0.474683	0.0458333
within early slopes	0.104853	0.0395833
within init	0.910844	0.0479167
within late slopes	0.072042	0.0354167
within North2nd	0.046355	0.0333333
within Norwich1st	0.00089964	0.01875	*
within Norwich2nd	9.11416e-05	0.0104167	*
within Sweden A	0.0309293	0.03125	*
within Sweden B	0.075224	0.0375
within Sweden C	0.239837	0.04375
